# Supplementary material for: Hydroxychloroquine in patients with mainly mild to moderate coronavirus disease 2019: open label, randomised controlled trial
Source: PubMed Central journal article supplement (PMC7221473; doi:10.1136/bmj.m1849), 2020-05-14
Supplement: weit056844.ww1.pdf [file weit056844.ww1.pdf]

**This supplement contains the following items:**

Hydroxychloroquine in patients mainly with COVID-19 mild to moderate symptoms: an open-label, randomized, controlled trial (ChiCTR2000029868)

- a. Original protocol, final protocol, summary of changes
- b. Original SAP (No amendment of SAP until the study completion)
- c. Final Case Report Form for mild/moderate and severe type
- d. Final Patient consent form

# **Original Clinical Study Protocol: KY2020-29**

Version date. 6 February 2020

This is the translated version of the original protocol  
originally written in Chinese.

# **Clinical research protocol of hydroxychloroquine in the treatment of mild to moderate COVID-19**

## **(Version 1.0)**

### **1. Background**

Since December 2019, Wuhan City, Hubei Province has found multiple cases of patients with pneumonia infected by a novel coronavirus (2019-nCoV). With the spread of the epidemic, other cases in China and abroad have also been found. [1] An important problem in the current diagnosis and treatment procedure is the lack of effective antiviral drugs. Early use of drugs with potential antiviral effects and clinically proven safety in human use is one of the fastest solutions to this problem.

Hydroxychloroquine (HCQ) is a 4-aminoquinoline antimalarial drug. It was artificially synthesized in 1944 and was first used for antimalarial treatment. Then it was used for systemic lupus erythematosus (SLE) in 1955 and in 1988. Rheumatoid arthritis has been widely recognized clinically for its role in regulating immunity and its safety and effectiveness. Hydroxychloroquine has similar effects to chloroquine (CQ), but the side effects are significantly reduced. [2] Not only in rheumatoid immune disease but also in antiviral process has HCQ shown obvious therapeutic effects, possibly by inhibiting TNF- $\alpha$ , IL-6 to treat acute respiratory distress syndrome (ARDS) caused by viral infection [3]. In special viral infections, such as HIV infection, chloroquine can reduce the inflammatory response in AIDS patients. [4] In related studies on SARS and MERS, HCQ has also shown possible antiviral efficacy at high doses. [5,6] Its antiviral action mechanism is to increase the pH of organelles such as lysosomes, interfere with intracellular iron metabolism, and prevent the virus from engulfing and shelling. At the same time, by increasing the pH of the Golgi apparatus, post-translational modification of viral proteins is inhibited, and intracellular pathogenic microorganisms are killed. [6,7] In related research on SARS virus, it can also prevent virus transmission by interfering with glycosylation of cellular receptors. [5] The safety of the drug and the distribution concentration in the tissue also perform well. [8, 9]

This study is intended to provide evidence for the therapeutic effect of high-dose hydroxychloroquine in patients with mild to moderate 2019-nCoV pneumonia. This project intends to conduct a prospective, multicenter, randomized controlled clinical trial to evaluate the drug viral negative rate, clinical symptom relief, improvement of laboratory test indicators, and prevention of increased disease severity are expected to confirm that the drug can be used as an antiviral therapy for patients with mild to moderate 2019-nCoV pneumonia.

## **2. Study content and methods**

### **2.1 Primary objective**

To evaluate the efficacy and safety of high dose of HCQ sulfate in patients with 2019-nCoV respiratory infection.

### **2.2 Study content**

#### **2.2.1 Design**

A prospective, multicenter, randomized, open-label clinical trial. A total of 200 subjects will be randomized to oral hydroxychloroquine treatment group or control group in a 1:1 ratio.

#### **2.2.2 Study population**

##### **Inclusion criteria**

Patients will be enrolled in the trial if all of the following criteria are met:

1.  $\geq 14$  years old
2. Meet criteria for 2019-nCoV pneumonia (Laboratory tests for upper and lower respiratory tract RT-PCR confirmed 2019-nCoV nucleic acid test positive combining CT imaging examination)
3. Onset time  $\leq 12$  days
4. Sign the informed consent
5. No participation in other clinical researches within 28 days

##### **Exclusion criteria**

Patients will not be enrolled if one or more of the following criteria are met:

1.  $< 14$  years old
2. Meet the criteria of severe 2019-nCoV pneumonia
3. Combining other serious medical diseases such as malignant tumors, heart, liver and kidney diseases, metabolic diseases, etc.
4. Not suitable for gastrointestinal administration
5. (For female patients) ongoing pregnancy or lactation, or childbearing potential but unwillingness to adopt abstinence or contraception measures during the study
6. Allergic to the ingredients of hydroxychloroquine tablets
7. Mental illness, or other reasons for non-cooperation in the investigator's opinion

### **2.2.3 Procedures:**

#### **Oral hydroxychloroquine group**

Day 1: Oral hydroxychloroquine 2 tablets (250mg / tablet) twice a day;

Day 2 - Day 3: Oral hydroxychloroquine 2 tablets (250mg / tablet) twice a day;

Day 4 - Day 10: Oral hydroxychloroquine (250mg / tablet) 1 tablet once a day.

#### **Control group**

Supportive and symptomatic treatment for 2019-nCoV pneumonia.

### **2.2.4 Concomitant Treatments**

#### **Permitted**

Appropriate supportive treatment(s) for 2019-nCoV pneumonia, that in the investigator's opinion will not interfere with the measurements contributing to the efficacy outcomes

Appropriate treatment(s) for any other underlying disease, that in the investigator's opinion will not interfere with the measurements contributing to the efficacy outcomes

If one or more treatments interfering with the measurements contributing to the primary efficacy outcomes are deemed necessary, the patient should not be randomized or should be discontinued from the study.

#### **Not permitted**

Antiviral drugs

### **2.2.5 Early Termination**

The trial can be terminated early in particular individual if any of the following circumstance occurs:

- Treatment needs to be changed due to disease progression during study period after comprehensive assessment by investigators.
- Serious adverse events lead to disease progression
- Patient is no longer willing to be treated with the investigated drug
- Severe liver disease (e.g. Child Pugh grade C, AST>5 times upper limit)
- Patients with severe renal impairment (estimated glomerular filtration rate  $\leq 30$  mL/min/1.73 m<sup>2</sup>) or receiving continuous renal replacement therapy, hemodialysis, peritoneal dialysis

### **1.2.6 Study endpoints**

#### **Primary endpoint**

Negative conversion rate of Sars-CoV-2 on day 10 of treatment (upper and lower respiratory tract nucleic acid detection negative rate)

## Secondary endpoints

- Oral hydroxychloroquine treatment is superior to supportive therapy in change from baseline to day 4, day 7, day 10 of clinical symptoms (criteria for improvement of clinical symptoms: body temperature returned to normal, SaO<sub>2</sub> returned to normal, respiratory symptoms were reduced by 50% from baseline);

- Oral hydroxychloroquine treatment is superior to supportive therapy in change from baseline to day 4, day 7, day 10 of laboratory indicators (CRP decreased by 50% from baseline, erythrocyte sedimentation decreased by 50%, and absolute peripheral lymphocyte count returned to normal);

- Oral hydroxychloroquine treatment is superior to supportive therapy in change from baseline to day 10 of improving rate of imaging (chest CT lesion absorption on day 10 of treatment is > 50% above baseline);

- Oral hydroxychloroquine treatment is not inferior to supportive therapy in change from baseline to day 4, day 7, day 10 of clinical exacerbation rate (the occurrence of severe / critical ill 2019-nCoV pneumonia).

Definition for severe and critically severe 2019-nCoV pneumonia:

A. Severe—Patients with 2019-nCoV pneumonia and at least one of the following:

1. Respiratory distress, RR ≥ 30 breaths per minute
2. SpO<sub>2</sub> ≤ 93% on room air
3. Partial arterial oxygen pressure (PaO<sub>2</sub>) / Fraction of inspired oxygen (FiO<sub>2</sub>) ≤ 300 mmHg (1 mmHg = 0.133 kPa).

B. Critically severe—Patients with severe 2019-nCoV pneumonia and at least one of the following:

1. Presence of lung failure requiring mechanical ventilation
2. Presence of shock;
3. Complicated with other organ failures requiring ICU monitoring

- Percentage of withdrawal from the study

### 1.2.7 Safety objectives

- **Incidence of adverse events** (Given that hydroxychloroquine is a commonly used anti-rheumatic and malaria parasite drug, the relevant adverse reactions have been fully documented, as shown in the following table):

### Side-effects of tested drug

|                              | HCQ sulphate                                                                                                                     |
|------------------------------|----------------------------------------------------------------------------------------------------------------------------------|
| Eye                          | Long-term or high dose administration could increase the risk of irreversible retinopathy and visual impairment                  |
| Hearing                      | tinnitus                                                                                                                         |
| Musculoskeletal system       | Sensory dyskinesia、 Skeletal myopathy or neuromyopathy leads to progressive proximal muscle atrophy, diminished tendon reflexes, |
| Gastrointestinal system      | Nausea, vomiting, diarrhea, bloating and burning sensation in the retrosternal area                                              |
| Skin and Subcutaneous tissue | Rash, itching, skin and mucous membranes pigmentation disorders, hair bleaching or loss                                          |
| hematological system         | Bone marrow suppression, anemia, aplastic anemia, neutrophilic granulocytosis, leukopenia, thrombocytopenia                      |
| Nervous system               | Dizziness, nystagmus, neurological aphasia、 headache, epilepsy, ataxia and extrapyramidal diseases                               |
| Psychic side effects         | Nervous, irritability, nightmare, psychosis, suicidal behavior                                                                   |
| Cardiovascular system        | Cardiomyopathy with possibility of heart failure and QT interval prolongation                                                    |
| Liver                        | Abnormality of liver function parameters                                                                                         |
| Immune system                | Urticaria, angioedema, bronchospasm                                                                                              |
| Metabolism                   | Loss of appetite、 hypoglycemia、 porphyria、 weight loss                                                                           |

### - Percentage of withdrawal from the study

#### 1.2.8 Statistical methods

Statistical analysis will be performed using SPSS or SAS software. The measurement data that follows the normal distribution will be described as mean  $\pm$  standard deviation. The comparison between groups uses analysis of variance. The comparison of rank data uses Kruskal-Wallis-H rank sum test. The correlation analysis between measurement data uses Pearson. Correlation test was performed by Spearman method.  $P < 0.05$  was considered statistically significant.

### 1.2.9 Time and Events Schedule (mild/moderate subgroup)

| Phase                        |                                                            | Screening/Baseline |         |         |         |
|------------------------------|------------------------------------------------------------|--------------------|---------|---------|---------|
|                              |                                                            | Visit 1            | Visit 2 | Visit 3 | Visit 4 |
| Visits                       |                                                            | Day -1~0           | Day 4   | Day 7   | Day 10  |
| General                      | Sign an informed consent                                   | ▲                  |         |         |         |
|                              | Demographics                                               | ▲                  |         |         |         |
|                              | Medical record                                             | ▲                  | ▲       | ▲       | ▲       |
| Clinical Symptoms            | Maximum body temperature (°C)                              | ▲                  | ▲       | ▲       | ▲       |
|                              | Visual score of respiratory symptoms                       | ▲                  | ▲       | ▲       | ▲       |
|                              | SaO2 (without oxygen intake)                               | ▲                  | ▲       | ▲       | ▲       |
|                              | Urine pregnancy test (women of childbearing age)           | ▲                  |         |         | ▲       |
| Laboratory tests             | C-reactive protein (CRP)                                   | ▲                  | ▲       | ▲       | ▲       |
|                              | ESR                                                        | ▲                  | ▲       | ▲       | ▲       |
|                              | Peripheral blood lymphocyte count                          | ▲                  | ▲       | ▲       | ▲       |
|                              | Imaging examination                                        | ▲                  |         |         | ▲       |
| Viral nucleic acid test      | Upper / lower respiratory tract sampling                   | ▲                  |         |         | ▲       |
| Disease severity assessment  | Assess whether developed into severe or critical pneumonia | ▲                  | ▲       | ▲       | ▲       |
| Inclusion/Exclusion criteria | Review inclusion / exclusion criteria                      | ▲                  |         |         |         |
|                              | Record adverse events                                      |                    | ▲       | ▲       | ▲       |
|                              | Record concomitant treatments                              | ▲                  | ▲       | ▲       | ▲       |
|                              | Assign participants drug number                            | ▲                  |         |         |         |
|                              | Distributing or recalling research drugs                   | ▲                  | ▲       | ▲       | ▲       |



### **1.3 Risk and benefits**

The current study is an open-label randomized trial for the evaluation of efficacy and safety of HCQ sulphate in the treatment of 2019-nCov respiratory infection. HCQ sulphate has been approved for clinical application as anti-inflammation and anti-microorganisms with good reported efficacy and safety profiles. We therefore anticipate that the administration of HCQ will not bring additional major risks.

Potential benefits:

1. Participants could benefit from the treatment group because the tested drug planned for investigation in this study is thought to offer potential benefits to individual subjects, based upon previous pre-clinical and several retrospective case-series investigations. With regard to control group, all patients were treated according to the latest guideline and therefore receive the best treatment at current stage.
2. For each participant, either assigned into treatment or control group, all the expenses for examination and treatment are covered by the sponsors.

Confidential:

Record of personal information will be kept private without publication according to legislation and laws. Results from this study, but not your identity, may be shared with local medical providers, government health organizations or international health workers to help them better understand 2019-nCoV infection.

## References:

1. 新型冠状病毒感染的肺炎诊疗方案（试行第五版）中华结核和呼吸杂志
2. Rainsford KD, et al. Therapy and pharmacological properties of hydroxychloroquine and chloroquine in treatment of systemic lupus erythematosus, rheumatoid arthritis and related diseases. *Inflammopharmacology*. 2015 Oct;23(5):231-69
3. A Savarino, JR Boelaert, A Cassone, et al. Effects of chloroquine on viral infections: drug against today's diseases? *The Lancet Infectious Disease* 2003.
4. Andrea Sarvarino, Lart Luca Shytaj. Chloroquine and beyond: exploring anti-rheumatic drugs to reduce immune hyperactivation in HIV/AIDS. *Retrovirology* 2015. 12-51.
5. MJ Vincent, E Bergeron, S Benjanne, et al. Chloroquine is a potent inhibitor of SARS coronavirus infection and spread. *Virology Journal*. 2005: 2:69.
6. J Dyll, CM Coleman, BJ Hart, et al. Repurposing of clinically developed drugs for treatment of middle east respiratory syndrome coronavirus infection. *Antimicrobial agents and chemotherapy*. 2014;58(8):4885-93.
7. Liang Shen, Junwei Niu, Chunhua Wang, et al. High throughput screening and identification of potent broad-spectrum inhibitors of coronaviruses. *Journal of Virology* June 2019 Volume 93 Issue 12
8. Mcchesney EW. Animal toxicity and pharmacokinetics of hydroxychloroquine sulfate. *The American Journal of Medicine*. 1983, 75(1): 11-18.
9. Mcchesney EW et al. Tissue distribution of chloroquine, hydroxychloroquine, and desethylchloroquine in the rat. *Toxicol Appl Pharmacol*. 1967, 10(3): 501-513

# **Original Clinical Study Protocol: KY2020-29**

Version date. 6 February 2020

This is the original version of the protocol in Chinese.

# 羟氯喹治疗轻中度武汉新型冠状病毒肺炎的临床 研究方案

(V1.0 版)

## 一、研究背景:

2019 年 12 月以来,湖北省武汉市陆续发现了多例新型冠状病毒感染的肺炎患者,随着疫情的蔓延,我国其他地区及境外也相继发现了此类病例。**【1】**目前严峻的诊治形式中的重要环节-有效的抗冠状病毒药物的缺乏。尽早使用有潜在抗病毒效应且临床已经证明其在人体使用中的安全性的药物是解决这一问题的最快方案之一。

羟氯喹(hydroxychloroquine, HCQ)属 4-氨基喹啉类抗疟药,1944 年人工合成,最初用于抗疟治疗,1955 年开始用于治疗系统性红斑狼疮(SLE),1988 年开始用于治疗类风湿关节炎,其调节免疫的作用及安全性和有效性已经得到了临床的广泛认可。羟氯喹与氯喹(CQ)有类似的效果,但副作用明显降低。**【2】**不仅在风湿免疫病,在抗病毒方面,氯喹也有明显的治疗作用,可能通过抑制 TNF $\alpha$ 、IL-6,治疗病毒感染引起的急性呼吸窘迫综合征(ARDS)**【3】**。在特殊病毒感染方面,如艾滋病病毒感染方面,氯喹可减轻艾滋病患者的炎症反应。**【4】**在冠状病毒 SARS 和中东呼吸道病毒的相关研究中,HCQ 也显示了高剂量使用可能存在的抗病毒疗效。**【5,6】**其抗病毒的作用机制在于通过提高溶酶体等细胞器的 PH 值,干扰细胞内铁代谢,阻止病毒的内吞、脱壳。同时通过升高高尔基体的 PH 值,抑制病毒蛋白翻译后的修饰,杀死胞内的病原微生物。**【6,7】**在 SARS 病毒的相关研究中,也可以通过干扰细胞受体的糖基化,阻止病毒传播。**【5】**其药物的安全性和组织中的分布浓度也有很好的表现。**【8, 9】**

本研究拟在确诊的新型冠状病毒肺炎的轻中度患者中,验证高剂量羟氯喹的治疗作用,本项目拟开展前瞻性、多中心、随机对照临床试验,评价该药物在新型冠状病毒肺炎的病毒转阴率、临床症状缓解、实验室检查指标的改善、预防疾病严重度增加的作用,预期可证实该药物可作为新型冠状病毒肺炎的轻中度患者抗病毒治疗用药。

## 二、研究内容和方法

### (一) 总体目标

本项目拟以高剂量羟氯喹治疗轻中度新型冠状病毒肺炎进行临床研究；对 200 例轻中度新型冠状病毒肺炎患者进行治疗有效性和安全性进行评价的临床试验，全面评价其在新型冠状病毒肺炎的临床作用。

## （二）研究内容和方法：

1. 1 研究目的：评价高剂量羟氯喹治疗轻中度新型冠状病毒肺炎的疗效和安全性。

### 1. 2 试验内容

1. 2. 1 设计：按照 100 比 100 例，前瞻性、多中心、随机、开放对照研究。

### 1. 2. 2 研究人群

入组标准：

1) 14 周岁以上。

2) 符合新型冠状病毒肺炎的诊断标准，【1】上和下呼吸道实验室检测 RT-PCR 证实 2019-nCov 核酸检测阳性，可以配合胸部 CT 影像学检查。

3) 发病时间  $\leq$  12 天。

4) 签署知情同意书。

5) 28 天内不参与其他研究药物的临床研究

排除标准

1) 年龄  $<$  14 岁患者；

2) 符合重度新型冠状病毒肺炎的诊断标准的患者【1】

3) 合并其他严重内科疾病如恶性肿瘤、心肝肾疾病，代谢性疾病等；

3) 不宜胃肠道给药者；

4) 妊娠期或哺乳期妇女；

5) 对本品成分过敏者；

6) 精神状态不能配合观察者或认知障碍者。

### 1、2、3 分组方法：

试验组：第一天口服羟氯喹（250mg/片）2 片，每日 2 次；第二天和第三天口服羟氯喹（250mg/片）2 片，每日 2 次；第四-第十天：（250mg/片）1 片，每日 1 次。

对照组：支持对症治疗

治疗周期：10 天

### 1.2.4 合并用药

治疗新型冠状病毒肺炎的支持对症药物，但不允许合并使用其他抗病毒药物。

## 1. 2. 5 提前终止

符合以下任何一种情况的均可提前结束研究，并记录结束时间

- ①研究期间出现疾病恶化，进展到重度肺炎，需要改变治疗
- ②药物不良事件的出现
- ③患者不愿意继续使用研究药物
- ④严重肝病(如 Child Pugh 评分 $\geq$ C, AST $>$ 5 倍以上)
- ⑤已知严重肾功能损害的患者(估计为肾小球)滤过率 $\leq$ 30 mL/min/1.73 m<sup>2</sup>)或连续肾脏替代疗法，血液透析，腹膜透析

## 1.2.6 研究终点

主要终点

- 1) 治疗第 10 天的新型冠状病毒检测转阴率（上、下呼吸道核酸检测转阴率）

次要终点

- 1) 评估时间点的临床症状改善率：评估时间为治疗前，治疗第 4 天，治疗第 7 天，治疗第 10 天）

临床症状改善的标准：体温恢复正常，SaO<sub>2</sub>恢复正常，呼吸道症状较基线减轻 50%，

- 2) 评估时间点的实验室指标改善率：评估时间为治疗前，治疗第 4 天，治疗第 7 天，治疗第 10 天）

C 反应蛋白（CRP）较基线下降 50%，血沉较基线下降 50%，外周血淋巴细胞绝对计数恢复正常。

- 3) 影像学好转率：治疗第 10 天胸部 CT 病灶吸收较基线 $>$ 50%

- 3) 临床恶化率：转为重型/危重型新型冠状病毒肺炎的发生。（评估时间为治疗第 4 天，治疗第 7 天，治疗第 10 天）

注：重型和危重型新型冠状病毒肺炎的定义【1】:

A: 重型——符合下列任何一条:

- 1.呼吸窘迫，RR $\geq$ 30 次/分；
- 2.静息状态下，指氧饱和度 $\leq$ 93%；

3. 动脉血氧分压 ( PaO<sub>2</sub> ) / 吸氧浓度 ( FiO<sub>2</sub> ) ≤ 300mmHg  
(1mmHg=0.133kPa)。

B: 危重型——符合以下情况之一者:

- 1.出现呼吸衰竭，且需要机械通气；
- 2.出现休克；
- 3.合并其他器官功能衰竭需 ICU 监护治疗。

安全性终点

①不良事件发生率（鉴于羟氯喹是临床常用的抗风湿及疟原虫药物，目前相关的不良反应已充分记载，具体如下表格）:

|          | 羟氯喹                                          |
|----------|----------------------------------------------|
| 眼睛       | 长期或者高剂量服用会引发不可逆的视网膜损伤以及视觉障碍。                 |
| 听力       | 耳鸣                                           |
| 肌肉骨骼系统   | 感觉运动障碍、骨骼肌肌病或神经肌病导致进行性弱和近端肌群萎缩、肌腱反射抑制和神经传导异常 |
| 胃肠系统     | 恶心、呕吐、腹泻、腹痛                                  |
| 皮肤和皮下组织等 | 皮疹、瘙痒、皮肤黏膜色素紊乱、毛色改变、脱发等                      |
| 血液系统     | 骨髓衰竭、贫血、再生障碍性贫血、粒细胞增多、白细胞减少、血小板减少等           |
| 中枢神经系统   | 眩晕、眼球震颤、神经性失语、头痛、头晕、癫痫、共济失调和锥体外系疾病           |
| 精神类副作用   | 紧张、易怒、噩梦、精神病、自杀行为                            |
| 心血管系统    | 心肌病并可能导致心力衰竭、QT 间期延长                         |
| 肝脏       | 肝功能指标异常                                      |
| 免疫系统     | 荨麻疹、血管水肿、支气管痉挛                               |
| 新陈代谢     | 食欲下降、低血糖、卟啉症、体重下降                            |

②退出研究的比例

1. 2. 7 统计学处理:

采用 SPSS 或 SAS 软件进行统计学分析。遵循正态分布的计量资料，以均数±标准差描述，组间比较采用方差分析，等级资料的比较采用 Kruskal-Wallis-H 秩和检验，计量资料之间的相关分析采用 Pearson，等级资料相关分析采用 Spearman 法进行相关性检验，P<0.05 为差异有统计学意义。

### 1. 3 临床研究流程图

| 研究阶段     |                           | 筛选入组/基线   |         |         |          |
|----------|---------------------------|-----------|---------|---------|----------|
|          |                           | 访视 1      | 访视 2    | 访视 3    | 访视 4     |
| 访视       |                           | 第-1 天~0 天 | 治疗第 4 天 | 治疗第 7 天 | 治疗第 10 天 |
| 一般情况     | 签署知情同意书                   | ▲         |         |         |          |
|          | 人口学资料                     | ▲         |         |         |          |
|          | 病史记录                      | ▲         | ▲       | ▲       | ▲        |
| 临床症状     | 日最高体温 (°C)                | ▲         | ▲       | ▲       | ▲        |
|          | 呼吸道症状可视性评分                | ▲         | ▲       | ▲       | ▲        |
|          | SaO <sub>2</sub> (不吸氧状态下) | ▲         | ▲       | ▲       | ▲        |
|          | 尿妊娠试验 (育龄妇女)              | ▲         |         |         | ▲        |
| 实验室检查    | C 反应蛋白 (CRP)              | ▲         | ▲       | ▲       | ▲        |
|          | 血沉                        | ▲         | ▲       | ▲       | ▲        |
|          | 外周血淋巴细胞绝对计数               | ▲         | ▲       | ▲       | ▲        |
|          | 影像学                       | ▲         |         |         | ▲        |
| 病毒核酸检测   | 上/下呼吸道采样                  | ▲         |         |         | ▲        |
| 疾病严重程度评估 | 评价是否转为重型或危重型肺炎            | ▲         | ▲       | ▲       | ▲        |
| 入排标准     | 审核入组/排除标准                 | ▲         |         |         |          |
|          | 记录不良事件                    |           | ▲       | ▲       | ▲        |
|          | 记录合并用药                    | ▲         | ▲       | ▲       | ▲        |
|          | 分配受试者药物编号                 | ▲         |         |         |          |
|          | 发放或回收研究药物                 | ▲         | ▲       | ▲       | ▲        |



### 三. 受试者的风险与获益风险:

本项目是一项随机对照开放性研究,羟氯喹作为已经上市数年的免疫抑制剂和抗病毒药物,安全性和疗效已经得到了一定的认可,预计不会给受试者带来额外的风险。

可能的获益:

1. 参与本研究的受试者可能从治疗组获益,对照组采样常规支持对症治疗,与目前治疗指南一致,故均可获得现有阶段最佳的治疗疗效。
2. 在参加研究期间,受试者相关检查费用和研究药物的费用将由申办方承担。

保密:

受试者的个人信息记录将被保密,根据法律和法规,将不会被公开。如果研究结果发表,受试者的个人身份仍将保密。

参考文献:

- 1.新型冠状病毒感染的肺炎诊疗方案(试行第五版)中华结核和呼吸杂志
2. Rainsford KD, et al. Therapy and pharmacological properties of hydroxychloroquine and chloroquine in treatment of systemic lupus erythematosus, rheumatoid arthritis and related diseases. *Inflammopharmacology*. 2015 Oct;23(5):231-69
3. A Savarino, JR Boelaert, A Cassone, et al. Effects of chloroquine on viral infections: drug against today's diseases? *The Lancet Infectious Disease* 2003.
4. Andrea Sarvarino, Lart Luca Shytaj. Chloroquine and beyond:exploring anti-rheumatic drugs to reduce immune hyperactivation in HIV/AIDS. *Retrovirology* 2015. 12-51.
5. MJ Vincent, E Bergeron, S Benjanne, et al. Chloroquine is a potent inhibitor of SARS coronavirus infection and spread. *Virology Journal*. 2005: 2:69.
6. J Dyall, CM Coleman, BJ Hart, et al. Repurposing of clinically developed drugs for treatment of middle east respiratory syndrome coronavirus infection. *Antimicrobial agents and chemotherapy*. 2014:58(8):4885-93.
7. Liang Shen, Junwei Niu, Chunhua Wang, et al. High throughput screening and identification of potent broad-spectrum inhibitors of coronaviruses. *Journal of Virology* June 2019 Volume 93 Issue 12
8. Mcchesney EW. Animal toxicity and pharmacokinetics of hydroxychloroquine sulfate. *The American Journal of Medicine*. 1983, 75(1): 11-18.
9. Mcchesney EW et al. Tissue distribution of chloroquine, hydroxychloroquine, and desethylchloroquine in the rat. *Toxicol Appl Pharmacol*. 1967, 10(3): 501-513

# **Final Clinical Study Protocol: KY2020-29**

Version date. 20 February 2020

This is the translated version of the final protocol originally  
written in Chinese.

# **Evaluation of the Efficacy and Safety of Hydroxychloroquine sulfate in Adult Patients With 2019-nCoV Respiratory Infection: A Multicenter, Randomized, Controlled Study (Version: 6.0)**

## **1. Background**

Since December 2019, an increasing number of cases diagnosed with “pneumonia of unknown etiology” have been identified in Wuhan, Hubei provinces, China. All these patients were subsequently confirmed with infection of a novel coronavirus (nCoV), of which, the full-length genome sequences share 79.5% identity to another CoV that caused Severe Acute Respiratory Syndrome (SARS) pandemic back in 2003 [1]. This nCov was then officially designated as “2019-nCoV” by the World Health Organization (WHO). The epidemiology of 2019-nCoV infection expanded to cities outside Wuhan and internationally [2].

The disease course and prognosis can be largely improved by the effective inhibition of virus replication, whereas no such drug has yet been approved to treat human CoV [3]. One of the best solutions to this problem is to use approved drugs with potential anti-viral effects and good safety profiles; among them, hydroxychloroquine (HCQ) is a promising candidate.

HCQ is a commonly used antimalarial drug, which together with chloroquine (CQ), belong to a class of drugs known as 4-aminoquinolines. After the first successful chemical synthesis of CQ in 1944, HCQ was generated by replacing ethyl with hydroxyethyl in the basic side chain of CQ. Comparing to CQ, HCQ is absorbed faster by the intestinal tract with a wider distribution in human body. Clinical applications of HCQ is first reported in antimalarial treatment and expands to systemic lupus erythematosus in 1955 and to rheumatoid arthritis in 1988. The immune modulatory effects,

safety and treatment efficacy of HCQ has been widely acknowledged [4]. Although HCQ and CQ have similar treatment efficacy, HCQ is preferred due its reduced toxicity [5,6] and its clinical applications have been expanded from rheumatic diseases to dermatology, malignancies and other fields because of the multifaceted effects on immune modulation, anti-inflammation, inhibiting of malignant cell growth and viability, enhancing clearance of lipid, anti-thrombosis and reducing diabetes risk [7,8]. In addition, CQ significantly reduces inflammatory response of SARS, possibly through the inhibition of TNF $\alpha$  and IL-6 [9]. Similarly, CQ is able to prevent an overexuberant inflammatory response in patients with human immunodeficiency virus (HIV) infection by inhibiting the HIV activated TLR-7 signaling pathway [10]. Treatment with HCQ (200–400 mg/day) for 8 weeks has been found to significantly reduce immune response, especially in patients with high viral load [11,12]. More importantly, high dose of HCQ treatment demonstrates anti-viral effects in studies investigating SARS-CoV and Middle East Respiratory Syndrome Coronavirus, (MERS-CoV) [13,14]. It has been proposed to use HCQ for the prophylaxis and treatment of SARS-CoV infection [13]. Animal studies demonstrate a survival rate of over 80% using CQ for the treatment of mice infected with MERS-CoV [14]. The main anti-viral mechanisms of HCQ include: 1) impairing the maturation of lysosomes and autophagosomes by increasing the pH of endosomal compartments; 2) interfering with cellular ferritin metabolism; 3) inhibiting posttranslational modification of virus protein by increasing the pH of Golgi apparatus. Moreover, CQ is able to inhibit p38 MAPK signaling pathway in HCoV-229e infected cell [14,16,17]. CQ is also reported to interfere with terminal glycosylation of the cellular receptor, angiotensin converting enzyme 2 in SARS-CoV, which negatively influence the virus-receptor binding and abrogate the infection [13]. Finally, animal studies have demonstrated good safety and tissue distribution of HCQ [18,19].

The aim of current study was to evaluate the efficacy and safety of high dose HCQ in the treatment of patients with 2019-nCoV respiratory infection stratified into mild, moderate and severe group. A prospective, multicenter, randomized clinical trial was performed to evaluate the effects of

HCQ on negative conversion rate of virus RNA, improvement of clinical symptom and laboratory parameters and prevention of disease progression. We hypothesized that HCQ could be an effective drug in the treatment of 2019-nCoV respiratory infection.

## **2. Study content and methods**

### **2.1 Primary objective**

The primary objective of this study is to evaluate the efficacy and safety of high dose of HCQ sulfate in patients with 2019-nCoV respiratory infection by comparisons between the HCQ plus standard-of-care (SOC) group and the SOC group.

### **2.2 Study design**

#### **2.2.1 Aim**

To evaluate the efficacy and safety of high dose of HCQ sulfate in patients with 2019-nCoV respiratory infection

#### **2.2.2 Study content**

##### **2.2.2.1 Study design**

This trial was a prospective, multicenter, open-label, randomized trial of patients with 2019-nCoV. The trial enrolled 360 patients with 1:1 randomization ratio stratified by disease severity (mild/moderate/severe) to receive either HCQ plus SOC or SOC alone.

##### **2.2.2.2 Study population**

Inclusion criteria:

- 1) Age  $\geq 18$  years
- 2) Upper or lower respiratory infection with 2019-nCoV as confirmed with real-time reverse-transcriptase–polymerase-chain-reaction (RT-PCR) with or without chest computed tomography examination;
- 3) Hospitalized with a SaO<sub>2</sub>/SPO<sub>2</sub>  $\leq 94\%$  on room air or PaO<sub>2</sub>/FiO<sub>2</sub> ratio  $< 300$  mmHg (only for severe group);

- 4) Willing to participate
- 5) Consent not to be enrolled by other clinical trials during study period

Exclusion Criteria:

- 1) Age <18 years
- 2) Patients with severe conditions including malignancies, heart/liver/kidney disease or poorly controlled metabolic diseases.
- 3) Not suitable to be administrated through GI tract
- 4) Pregnant or lactation
- 5) Allergy to HCQ
- 6) Unable to co-operate with investigators due to cognitive impairments or poor mental status
- 7) Severe liver disease (e.g. Child Pugh grade C, ALT>5 times upper limit)
- 8) Patients with severe renal impairment (estimated glomerular filtration rate  $\leq 30$  mL/min/1.73 m<sup>2</sup>) or receiving continuous renal replacement therapy, hemodialysis, peritoneal dialysis

### 2.2.2.3 Procedures

- SOC: SOC was aligned with the indications from the available clinical practice guidelines.
- SOC plus HCQ: HCQ was administrated in combination with SOC. Dose of HCQ: Day1~Day3: oral dose (100mg/tablet or 200mg/tablet) 400mg, three times a day; Day4~Day14/Day21: oral dose (100mg/tablet or 200mg/tablet) 400mg, twice a day.
- Duration: Mild or Moderate 14 days, Severe type 21-days.
- Dose adjustment: Treatment dose will be adjusted only when adverse events are related to the investigated drug as judged by investigators. In any case, investigator should perform evaluation carefully based on clinical experience. Treatment can be temporarily stopped or adjusted to a lower level of dose (switch from 400mg to 300mg), if the investigator considers a continued treatment with pre-defined dose will increase toxicity based on the individual safety and tolerance. Treatment can be restarted at original dose or at a lower level if the patients was recovered from

adverse events.

**Table 2-1 Study Drug Administration**

|                 | <b>Original dose level</b>                  | <b>Adjusted dose level</b>                 |
|-----------------|---------------------------------------------|--------------------------------------------|
| Day 1-3         | 1200mg/day<br>three times/day, 400mg/tablet | 900mg/day<br>three times/day, 300mg/tablet |
| Day 4~Day 14/21 | 800mg a day<br>twice/day, 400mg/tablet      | 600mg a day<br>twice/day, 300mg/tablet     |

The investigators should also evaluate the clinical benefits to decide whether continues treatment until Day14/21 in cases with disease progression.

#### **2.2.2.4 Concomitant drugs**

All standard drugs that are recommended by the guideline can be used for SOC, except for other drugs belongs to 4-aminoquinolines, *e.g.*, CQ phosphate. Patients who have received CQ can be enrolled after 48h of withdrawal. Medications for diseases other than 2019-nCoV respiratory infection can be used during the study period.

#### **2.2.2.5 Early Termination**

The trail can be terminated early if any of the following circumstance occurs:

- ① Treatment needs to be changed due to disease progression during study period after comprehensive assessment by investigators.
- ② Serious adverse events lead to disease progression
- ③ Patient is no longer willing to be treated with the investigated drug

#### **2.2.2.6 Endpoints**

Primary endpoint: Negative conversion rate of virus nucleic acid within 28-day

For severe disease subgroup, considering both virology conversion and clinical improvement.

- Definition for clinical improvement: decline of two categories from enrollment status on a six-category ordinal scale of clinical status which ranging from 1 (discharged) to 6 (death)

**Table 2-2 Six-category ordinal scale**

| Scale | Description                                                        |
|-------|--------------------------------------------------------------------|
| 6     | Death                                                              |
| 5     | ICU, requiring ECMO and/or IMV                                     |
| 4     | ICU/hospitalization, requiring NIV/ HFNC therapy                   |
| 3     | Hospitalization, requiring supplemental oxygen (but not NIV/ HFNC) |
| 2     | Hospitalization, not requiring supplemental oxygen;                |
| 1     | Discharge                                                          |

Abbreviation: IMV, invasive mechanical ventilation; NIV, non-invasive mechanical ventilation; HFNC, High-flow nasal cannula.

Secondary endpoint:

- 1) Negative conversion rate of virus nucleic acid at day 4, 7, 10, 14 or 21.
- 2) Improvement rate of clinical symptoms within 28-day
  - Definition for clinical symptoms improvement: resolving from fever (axillary temperature  $\leq 36.6^{\circ}\text{C}$ , or oral temperature  $\leq 37.2^{\circ}\text{C}$ , or rectal/ear temperature  $\leq 37.8^{\circ}\text{C}$ ), normalization of SpO<sub>2</sub> (SpO<sub>2</sub> >94% on room air), disappearance of respiratory symptom.
- 3) Improvement rate of laboratory parameters within 28-day
  - Definition for laboratory parameters improvement: 50% decline of C-reactive protein, erythrocyte sedimentation rate, IL-6 and TNF- $\alpha$  level from baseline and normalization of absolute blood lymphocyte count.
- 4) Improvement rate of chest radiology within 28-day
  - Definition for radiology improvement: Resolved more than 50% from baseline on chest CT images
- 5) All-cause mortality
- 6) Clinical status at Day 7, 14, 21, 28 in patients with severe 2019-nCoV respiratory infection
- 7) For severe disease subgroup: Duration (days) of mechanical ventilation, extracorporeal membrane oxygenation, supplemental oxygenation and hospital stay
- 8) For mild/moderate subgroup: Progression rate within 28-day



Definition for progression: progress to severe or critically severe.

Definition for severe and critically severe 2019-nCoV pneumonia [3]:

- C. Severe—Patients with 2019-nCoV pneumonia and at least one of the following:
  - 4. Respiratory distress,  $RR \geq 30$  breaths per minute
  - 5.  $SpO_2 \leq 93\%$  on room air
  - 6. Partial arterial oxygen pressure ( $PaO_2$ ) / Fraction of inspired oxygen ( $FiO_2$ )  
 $\leq 300\text{mmHg}$  ( $1\text{mmHg}=0.133\text{kPa}$ ).
  
- D. Critically severe—Patients with severe 2019-nCoV pneumonia and at least one of the following:
  - 4. Presence of lung failure requiring mechanical ventilation
  - 5. Presence of shock;
  - 6. Complicated with other organ failures requiring ICU monitoring

Safety endpoint:

① AE rate

Given that HCQ sulphate has been widely used in antimalarial and rheumatoid arthritis treatment, the side-effects of HCQ have been fully established as listed in Table 2-3. Among all the side-effects, gastrointestinal upset, particularly diarrhea, and retinopathy are relative common at a regular dose but usually resolve after treatment is stopped.

② Dropout rate

**Table 2-3 Side-effects of tested drug**

|                              |                                                                                                                                  |
|------------------------------|----------------------------------------------------------------------------------------------------------------------------------|
|                              | HCQ sulphate                                                                                                                     |
| Eye                          | Long-term or high dose administration could increase the risk of irreversible retinopathy and visual impairment                  |
| Hearing                      | tinnitus                                                                                                                         |
| Musculoskeletal system       | Sensory dyskinesia、 Skeletal myopathy or neuromyopathy leads to progressive proximal muscle atrophy, diminished tendon reflexes, |
| Gastrointestinal system      | Nausea, vomiting, diarrhea, bloating and burning sensation in the retrosternal area                                              |
| Skin and Subcutaneous tissue | Rash, itching, skin and mucous membranes pigmentation disorders, hair bleaching or loss                                          |
| hematological system         | Bone marrow suppression, anemia, aplastic anemia, neutrophilic granulocytosis, leukopenia, thrombocytopenia                      |
| Nervous system               | Dizziness, nystagmus, neurological aphasia、 headache, epilepsy, ataxia and extrapyramidal diseases                               |
| Psychic side effects         | Nervous, irritability, nightmare, psychosis, suicidal behavior                                                                   |
| Cardiovascular system        | Cardiomyopathy with possibility of heart failure and QT interval prolongation                                                    |
| Liver                        | Abnormality of liver function parameters                                                                                         |
| Immune system                | Urticaria, angioedema, bronchospasm                                                                                              |
| Metabolism                   | Loss of appetite、 hypoglycemia、 porphyria、 weight loss                                                                           |

**2.2.2.7 Statistical Methods****Sample Size Justification:**

Approximately 360 subjects (180 per group) will be randomized in the study. The sample size for this study is based on the alternative hypothesis of a 30% reduction of time to virus nucleic acid negativity. Under the exponential distribution, this benefit translates to a reduction in median time to virology negativity from 10 days to 7 days. A total of 248 events would provide a power of 80% to detect a 30% reduction of hazard ratio (control vs. treatment) of 0.70 with a Log-Rank test, assuming a two-sided significance level of 5%. A 75-day accrual period and an additional 7-day follow-up are assumed. The sample size calculation has also taken into consideration an annual dropout rate of 20%.

A co-primary endpoint in the subgroup defined by severe disease is 28-day clinical improvement. Assume 50% patients have clinical improvement by day 28 in control group, 100 patients can detect a 25% improvement in treatment group with a power=70%.

**Analysis Set:**

- Intent-to-treat (ITT): is defined as subjects who have been randomly assigned to the treatment group or control group. Analyses of efficacy will be based on this population. The ITT analyses grouping will be according to treatment planned.
- Per Protocol Set (PPS): is a subset of ITT, defined as all subjects who have been randomly assigned to the study and received at least 11-day treatment (mild/moderate disease)/16-day treatment (severe disease), and have no major PD which significantly impact primary endpoint. The analyses grouping will be according to treatment planned.
- Safety population: is defined as subjects who have received at least 1 administration of any study treatment (partial or complete). This population will be used for all safety analyses. The safety analyses grouping will be according to treatment actually received.

**Efficacy Analysis:**

- **Primary Efficacy Analysis:**

The Kaplan-Meier method will be used to estimate the distribution of time to negativity for each treatment group. The median time to negativity with 95% CI will be provided. In addition, the number and percentage of subjects who have an event or are censored will be reported. The Kaplan-Meier curve will also be plotted by treatment group and will be compared by the stratified log-rank test. The stratification factor is the same as factor considered in the randomization procedure.

In the severe disease subgroup, the rate of clinical improvement by 28-day will be

summarized and compared by Chi-square test (or Exact test, if frequency is low). As the supporting analysis, KM method may be applied to estimate the proportion of clinical status improvement by day 28.

- **Secondary Efficacy Analysis:**

Report the rates and relative risk and their 95% confidence interval by the day of 4,7,10,14,21 for secondary endpoints (Negative conversion rate of virus nucleic acid, Improvement rate of clinical symptoms, Improvement rate of laboratory parameters, Improvement rate of chest radiology, All-cause mortality, Clinical status change, progression, etc). Descriptive statistics (mean, standard deviation, median, range) will be used to summarize duration (days) of mechanical ventilation, extracorporeal membrane oxygenation, supplemental oxygenation and hospital stay. If applicable, KM method will be used to analyze time-to-events type endpoints. Median and 95% CI may be reported. KM curves will be compared by log-rank test.

**Safety:**

The incidence and prevalence of AEs, TEAEs, SAEs and ADRs will be summarized overall, by treatment group, by MedDRA (the latest version) system organ class and preferred term (PT).

Descriptive statistics (mean, standard deviation, median, range) will be used to summarize observed laboratory values, ECG, vital signs and physical examination findings and change from baseline in observed value at each scheduled visit for each treatment group. When applicable, shift table for baseline value (normal vs abnormal but not clinically meaningful vs. abnormal and clinically meaningful) and post-baseline value will be provided.

**Interim Analysis:**

An Independent Data Monitoring Committee (IDMC) will be established to review data at 1 interim analyses prior to the primary endpoint analysis.

The O'Brien-Fleming type  $\alpha$ -spending function by Lan-DeMets algorithm (Lan-Demets, 1983)

will be applied to control family-wise type-I error which is 0.05, two-sided, in this study.

The first interim analysis will occur after 40% of subjects (around 150 subjects) have been treated for 7 days or have discontinued. The goal is to evaluate efficacy and need of sample size re-estimation. p-value boundary for efficacy significance is 0.00079 (two-sided).

Final analysis will be conducted after 248 events are observed. p-value boundary is 0.04974 (two-sided).

The actual  $\alpha$  spent and p-value boundaries at each analysis will be calculated based on the exact observed number of events.

## 2.2.2.8 Study Schematic

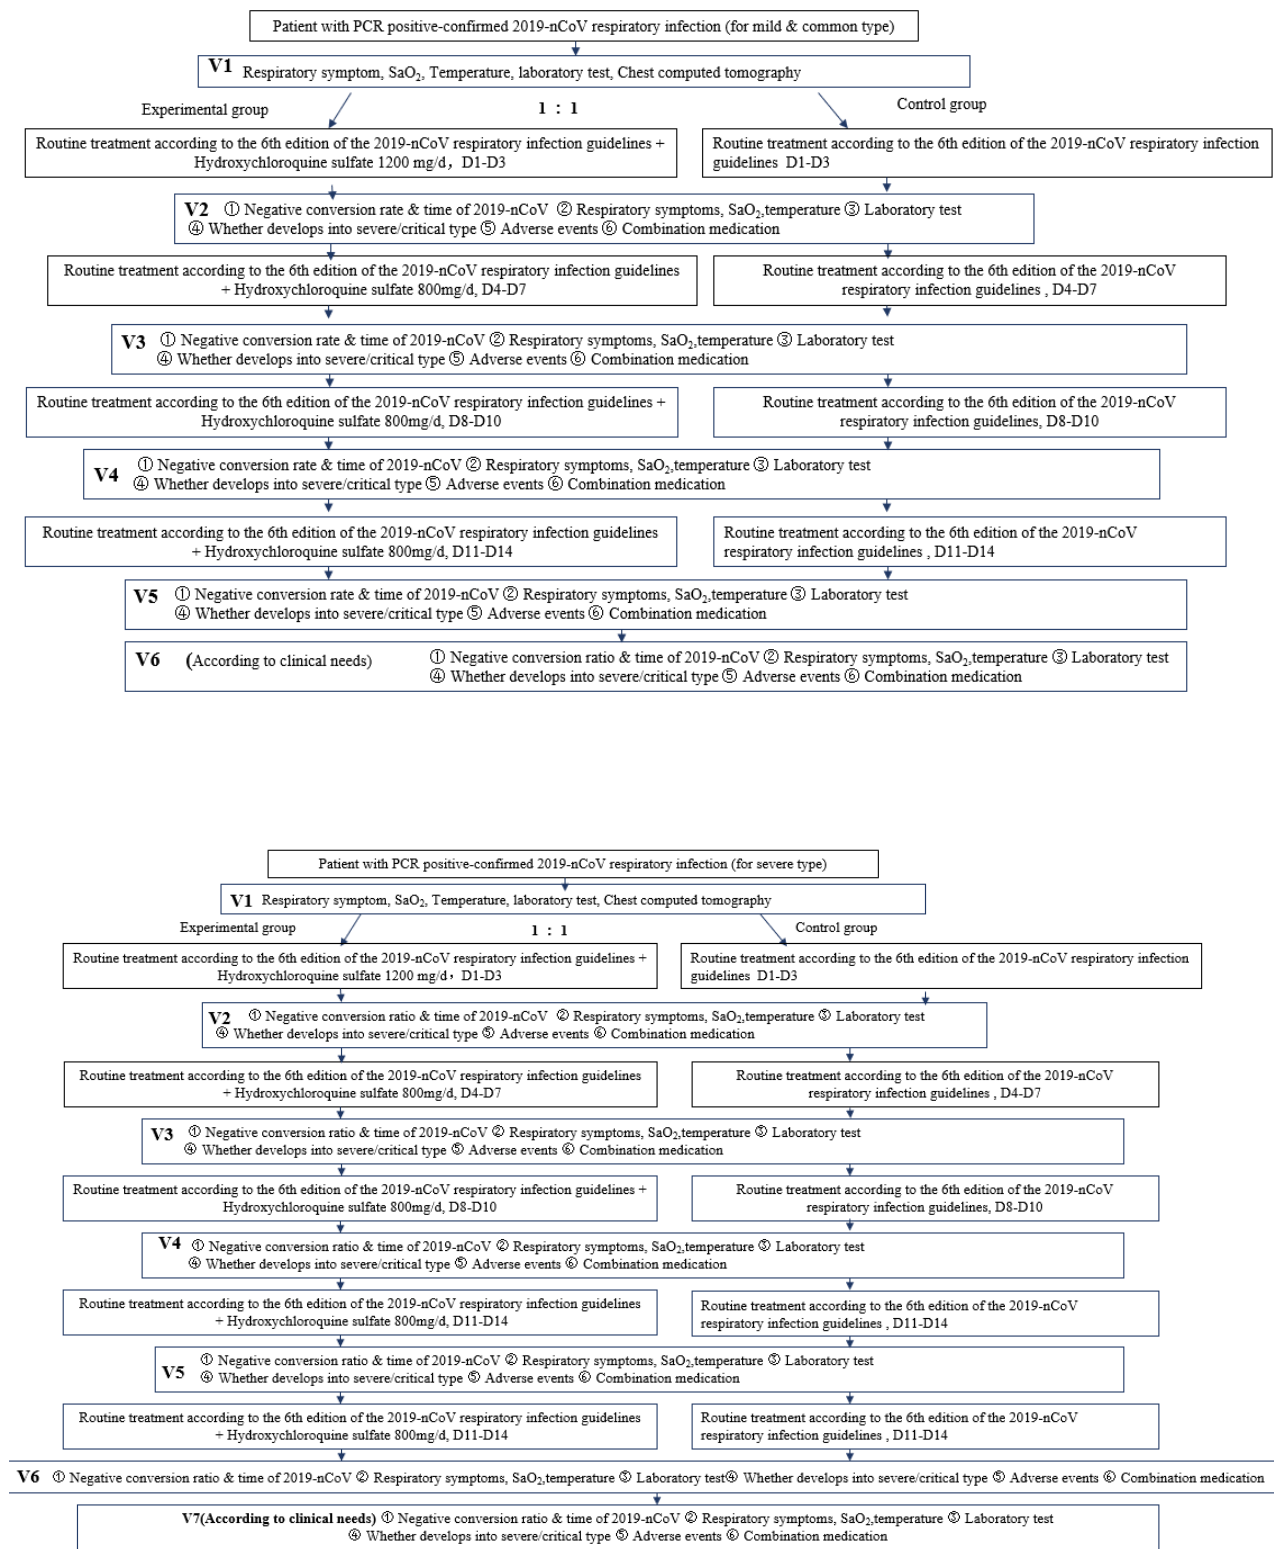

## 2.3 Time and Events Schedule

**Table 2-3 Time and Events Schedule (mild/moderate subgroup)**

| Evaluation / Procedure                                                             | Screen/<br>Treatment | Treatment and follow-up (Day 2-14) |       |        |        | Extended follow-up <sup>[13]</sup>        |        |
|------------------------------------------------------------------------------------|----------------------|------------------------------------|-------|--------|--------|-------------------------------------------|--------|
|                                                                                    |                      | V2                                 | V3    | V4     | V5     | V6                                        | V7     |
| Visit                                                                              | V1                   | V2                                 | V3    | V4     | V5     | V6                                        | V7     |
| Day +/- Window                                                                     | D-3~1                | D4±1d                              | D7±1d | D10±1d | D14±1d | D21±2d                                    | D28±2d |
| Informed Consent                                                                   | ×                    |                                    |       |        |        |                                           |        |
| I/E Criteria                                                                       | ×                    |                                    |       |        |        |                                           |        |
| Randomization                                                                      | ×                    |                                    |       |        |        |                                           |        |
| Demographics <sup>[1]</sup>                                                        | ×                    |                                    |       |        |        |                                           |        |
| Epidemiological and medical history <sup>[2]</sup>                                 | ×                    |                                    |       |        |        |                                           |        |
| Physical examination <sup>[3]</sup>                                                | ×                    |                                    |       |        | ×      | ×                                         | ×      |
| Vital signs <sup>[4]</sup>                                                         | ×                    | ×                                  | ×     | ×      | ×      | ×                                         | ×      |
| 12-lead electrocardiogram                                                          | × <sup>[11]</sup>    |                                    |       |        | ×      | ×                                         | ×      |
| CRP, ESR                                                                           | × <sup>[11]</sup>    | ×                                  | ×     | ×      | ×      | ×                                         | ×      |
| TNF- $\alpha$ , IL-6                                                               | × <sup>[11]</sup>    | ×                                  | ×     | ×      | ×      | ×                                         | ×      |
| CBC with differential <sup>[5]</sup>                                               | × <sup>[11]</sup>    | ×                                  | ×     | ×      | ×      | ×                                         | ×      |
| Urinalysis <sup>[6]</sup>                                                          | × <sup>[11]</sup>    |                                    |       |        | ×      | ×                                         | ×      |
| Blood chemistry <sup>[7]</sup><br>(hepatic and kidney panel,<br>Myocardial enzyme) | × <sup>[11]</sup>    | ×                                  | ×     | ×      | ×      | ×                                         | ×      |
| Coagulation panel <sup>[8]</sup>                                                   | × <sup>[11]</sup>    | ×                                  | ×     | ×      | ×      | ×                                         | ×      |
| 2019-nCoV RT-PCR <sup>[9]</sup>                                                    | × <sup>[12]</sup>    | ×                                  | ×     | ×      | ×      | ×                                         | ×      |
| Pulse oximetry (on room air)                                                       | ×                    | ×                                  | ×     | ×      | ×      | ×                                         | ×      |
| Pregnancy Test (Serum or Urine<br>hCG)                                             | × <sup>[11]</sup>    |                                    |       |        | ×      |                                           |        |
| Chest CT                                                                           | × <sup>[11]</sup>    |                                    |       |        | ×      | Optional ( <i>as per clinical needs</i> ) |        |
| Respiratory symptom (Y/N)                                                          | ×                    | ×                                  | ×     | ×      | ×      | ×                                         | ×      |
| Study drug administration <sup>[10]</sup>                                          | ×                    | ×                                  | ×     | ×      | ×      |                                           |        |
| Progression to severe/critically<br>severe type (Y/N)                              |                      | ×                                  | ×     | ×      | ×      | ×                                         | ×      |
| Record of SMT                                                                      | ×                    | ×                                  | ×     | ×      | ×      | ×                                         | ×      |
| AE Assessment                                                                      | ×                    | ×                                  | ×     | ×      | ×      | ×                                         | ×      |

1. Demographics include birth date, gender and ethnicity.
2. Epidemiological information includes recent travel history and exposure to epidemic area or infected patients; medical history includes present illness and past medical history including co-morbidity medications
3. Physical examination includes height, weight, general outlook, head, eye, ear, nose, throat, neck and thyroid, skin, cardiovascular system, Anterior chest and lung, abdomen, neuro system, skeletal muscle system and lymphatic system
4. Vital signs: body temperature, respiratory rate, pulse, blood pressure; record maximum temperature of the visiting day and use same measurement criteria throughout the study period.
5. CBC with differential includes: haptoglobin and absolute count of red blood cell, platelet, total white blood cell, neutrophil, lymphocyte, monocyte, eosinophil and basophil
6. Urinalysis: urinary pH, urinary red blood cell, urinary white blood cell, urinary protein, glucose and ketone
7. Blood chemistry includes alanine aminotransferase, aspartate aminotransferase, total bilirubin, albumin,  $\gamma$ -glutamyl transpeptidase, lactate dehydrogenase, creatine kinase, creatine kinase isoenzyme-MB, blood urea nitrogen and creatinine
8. Coagulation panel includes: Prothrombin time, activated partial thrombin time, thrombin time, fibrinogen and international normalized ratio.
9. RT-PCR results upon unplanned visit should also be recorded in CRF
10. Record daily administration of tested drug including under use and over use
11. These examinations can be exempted by the investigators if the participants can provide qualified examination results within 3-day prior to initiation of the study
12. RT-PCR results of 2019-nCoV within 5-day prior to initiation of the study can be used for screening
13. For patients discharge alive, only medications and AE information will be collected *via* telephone contact.



**Table 2-3 Time and Events Schedule (severe subgroup)**

| Evaluation / Procedure                                                             | Screen/<br>Treatment | Treatment and follow-up (Day 2-14)        |       |        |        |        | Extended<br>follow-up <sup>[13]</sup>             |
|------------------------------------------------------------------------------------|----------------------|-------------------------------------------|-------|--------|--------|--------|---------------------------------------------------|
|                                                                                    |                      | V2                                        | V3    | V4     | V5     | V6     |                                                   |
| Visit                                                                              | V1                   | V2                                        | V3    | V4     | V5     | V6     | V7                                                |
| Day +/- Window                                                                     | D-3~1                | D4±1d                                     | D7±1d | D10±1d | D14±1d | D21±2d | D28±2d                                            |
| Informed Consent                                                                   | ×                    |                                           |       |        |        |        |                                                   |
| I/E Criteria                                                                       | ×                    |                                           |       |        |        |        |                                                   |
| Randomization                                                                      | ×                    |                                           |       |        |        |        |                                                   |
| Demographics <sup>[1]</sup>                                                        | ×                    |                                           |       |        |        |        |                                                   |
| Epidemiological and medical<br>history <sup>[2]</sup>                              | ×                    |                                           |       |        |        |        |                                                   |
| Physical examination <sup>[3]</sup>                                                | ×                    |                                           |       |        |        | ×      | ×                                                 |
| Vital signs <sup>[4]</sup>                                                         | ×                    | ×                                         | ×     | ×      | ×      | ×      | ×                                                 |
| 12-lead electrocardiogram                                                          | × <sup>[11]</sup>    |                                           |       |        |        | ×      | ×                                                 |
| CRP, ESR                                                                           | × <sup>[11]</sup>    | ×                                         | ×     | ×      | ×      | ×      | ×                                                 |
| TNF- $\alpha$ , IL-6                                                               | × <sup>[11]</sup>    | ×                                         | ×     | ×      | ×      | ×      | ×                                                 |
| CBC with differential <sup>[5]</sup>                                               | × <sup>[11]</sup>    | ×                                         | ×     | ×      | ×      | ×      | ×                                                 |
| Urinalysis <sup>[6]</sup>                                                          | × <sup>[11]</sup>    |                                           |       |        |        | ×      | ×                                                 |
| Blood chemistry <sup>[7]</sup><br>(hepatic and kidney panel,<br>Myocardial enzyme) | × <sup>[11]</sup>    | ×                                         | ×     | ×      | ×      | ×      | ×                                                 |
| Coagulation panel <sup>[8]</sup>                                                   | × <sup>[11]</sup>    | ×                                         | ×     | ×      | ×      | ×      | ×                                                 |
| 2019-nCoV RT-PCR <sup>[9]</sup>                                                    | × <sup>[12]</sup>    | ×                                         | ×     | ×      | ×      | ×      | ×                                                 |
| Pulse oximetry (on room air)                                                       | ×                    | ×                                         | ×     | ×      | ×      | ×      | ×                                                 |
| Arterial blood gas analysis                                                        | × <sup>[11]</sup>    | Optional ( <i>as per clinical needs</i> ) |       |        |        |        |                                                   |
| Pregnancy Test (Serum or<br>Urine hCG)                                             | × <sup>[11]</sup>    |                                           |       |        |        | ×      |                                                   |
| Chest CT                                                                           | × <sup>[11]</sup>    |                                           |       |        |        | ×      | Optional ( <i>as<br/>per clinical<br/>needs</i> ) |
| Respiratory symptom (Y/N)                                                          | ×                    | ×                                         | ×     | ×      | ×      | ×      | ×                                                 |
| Study drug administration <sup>[10]</sup>                                          | ×                    | ×                                         | ×     | ×      | ×      | ×      |                                                   |
| Clinical status                                                                    | ×                    |                                           | ×     |        | ×      | ×      | ×                                                 |
| IMV/NIV, ECMO or<br>supplemental oxygen (Y/N)                                      | ×                    | ×                                         | ×     | ×      | ×      | ×      | ×                                                 |
| Record of SMT                                                                      | ×                    | ×                                         | ×     | ×      | ×      | ×      | ×                                                 |

| AE Assessment                                                                                                                                                                                                                                                                                                                                                                                                                                                                                                                                                                                                                                                                                                                                                                                                                                                                                                                                                                                                                                                                                                                                                                                                                                                                                                                                                                                                                                                                                                                                                                                                                                                                                                                                                                                                                                                                                                                                                                                                                                                                                                                                                | × | × | × | × | × | × | × |
|--------------------------------------------------------------------------------------------------------------------------------------------------------------------------------------------------------------------------------------------------------------------------------------------------------------------------------------------------------------------------------------------------------------------------------------------------------------------------------------------------------------------------------------------------------------------------------------------------------------------------------------------------------------------------------------------------------------------------------------------------------------------------------------------------------------------------------------------------------------------------------------------------------------------------------------------------------------------------------------------------------------------------------------------------------------------------------------------------------------------------------------------------------------------------------------------------------------------------------------------------------------------------------------------------------------------------------------------------------------------------------------------------------------------------------------------------------------------------------------------------------------------------------------------------------------------------------------------------------------------------------------------------------------------------------------------------------------------------------------------------------------------------------------------------------------------------------------------------------------------------------------------------------------------------------------------------------------------------------------------------------------------------------------------------------------------------------------------------------------------------------------------------------------|---|---|---|---|---|---|---|
| <ol style="list-style-type: none"> <li>1. Demographics include birth date, gender and ethnicity.</li> <li>2. Epidemiological information includes recent travel history and exposure to epidemic area or infected patients; medical history includes present illness and past medical history including co-morbidity medications</li> <li>3. Physical examination includes height, weight, general outlook, head, eye, ear, nose, throat, neck and thyroid, skin, cardiovascular system, Anterior chest and lung, abdomen, neuro system, skeletal muscle system and lymphatic system</li> <li>4. Vital signs: body temperature, respiratory rate, pulse, blood pressure; record maximum temperature of the visiting day and use same measurement criteria throughout the study period.</li> <li>5. CBC with differential includes: haptoglobin and absolute count of red blood cell, platelet, total white blood cell, neutrophil, lymphocyte, monocyte, eosinophil and basophil</li> <li>6. Urinalysis: urinary pH, urinary red blood cell, urinary white blood cell, urinary protein, glucose and ketone</li> <li>7. Blood chemistry includes alanine aminotransferase, aspartate aminotransferase, total bilirubin, albumin, <math>\gamma</math>-glutamyl transpeptidase, lactate dehydrogenase, creatine kinase, creatine kinase isoenzyme-MB, blood urea nitrogen and creatinine</li> <li>8. Coagulation panel includes: Prothrombin time, activated partial thrombin time, thrombin time, fibrinogen and international normalized ratio.</li> <li>9. RT-PCR results upon unplanned visit should also be recorded in CRF</li> <li>10. Record daily administration of tested drug including under use and over use</li> <li>11. These examinations can be exempted by the investigators if the participants can provide qualified examination results within 3-day prior to initiation of the study</li> <li>12. RT-PCR results of 2019-nCoV within 5-day prior to initiation of the study can be used for screening</li> </ol> <p>For patients discharge alive, only medications and AE information will be collected <i>via</i> telephone contact.</p> |   |   |   |   |   |   |   |

### 2.3 Risk and benefits

The current study is an open-label randomized trial for the evaluation of efficacy and safety of HCQ sulphate in the treatment of 2019-nCov respiratory infection. HCQ sulphate has been approved for clinical application as anti-inflammation and anti-microorganisms with good reported efficacy and safety profiles. We therefore anticipate that the administration of HCQ will not bring additional major risks.

Potential benefits:

Participants could benefit from the treatment group because the tested drug planned for

investigation in this study is thought to offer potential benefits to individual subjects, based upon previous pre-clinical and several retrospective case-series investigations. With regard to control group, all patients were treated according to the latest guideline and therefore receive the best treatment at current stage.

For each participant, either assigned into treatment or control group, all the expenses for examination and treatment are covered by the sponsors.

#### Confidential:

Record of personal information will be kept private without publication according to legislation and laws. Results from this study, but not your identity, may be shared with local medical providers, government health organizations or international health workers to help them better understand 2019-nCoV infection.

#### Reference:

1. Zhou P, Yang XL, Wang XG, et al. A pneumonia outbreak associated with a new coronavirus of probable bat origin [published online ahead of print, 2020 Feb 3]. *Nature*. 2020; doi:10.1038/s41586-020-2012-7
2. Wang C, Horby PW, Hayden FG, Gao GF. A novel coronavirus outbreak of global health concern [published online ahead of print, 2020 Jan 24]. *Lancet*. 2020; doi:10.1016/S0140-6736(20)30185-9.
3. 国家卫生健康委员会. 新型冠状病毒感染的肺炎诊疗方案 (试行第六版), [http://www.gov.cn/zhengce/zhengceku/2020-02/05/content\\_5474791.html](http://www.gov.cn/zhengce/zhengceku/2020-02/05/content_5474791.html), 2020.02.05 发行
4. Leden I. Antimalarial drugs-350 years. *Scand J Rheumatol*. 1981;10(4):307–312.
5. Rainsford KD, Parke AL, Clifford-Rashotte M, et al. Therapy and pharmacological properties of hydroxychloroquine and chloroquine in treatment of systemic lupus erythematosus, rheumatoid arthritis and related diseases. *Inflammopharmacology*. 2015;23(5):231–269
6. 赵义,李小霞, 用辩证的眼光看待硫酸羟氯喹的用药安全, *药物不良反应杂志* 2015;17(3): 164-166.
7. Ben-Zvi I, Kivity S, Langevitz P, Shoenfeld Y. Hydroxychloroquine: from malaria to autoimmunity. *Clin Rev*

Allergy Immunol. 2012;42(2):145–153.

8. Olsen NJ, Schleich MA, Karp DR. Multifaceted effects of hydroxychloroquine in human disease. *Semin Arthritis Rheum.* 2013;43(2):264–272.

9. Savarino A, Boelaert JR, Cassone A, Majori G, Cauda R. Effects of chloroquine on viral infections: an old drug against today's diseases?. *Lancet Infect Dis.* 2003;3(11):722–727.

10. Savarino A, Gennero L, Sperber K, Boelaert JR. The anti-HIV-1 activity of chloroquine. *J Clin Virol.* 2001;20(3):131–135.

11. Savarino A, Shytaj IL. Chloroquine and beyond: exploring anti-rheumatic drugs to reduce immune hyperactivation in HIV/AIDS. *Retrovirology.* 2015;12:51, doi: 10.1186/s12977-015-0178-0.

12. Akpovwa H. Chloroquine could be used for the treatment of filoviral infections and other viral infections that emerge or emerged from viruses requiring an acidic pH for infectivity. *Cell Biochem Funct.* 2016;34(4):191–196.

13. Vincent MJ, Bergeron E, Benjannet S, et al. Chloroquine is a potent inhibitor of SARS coronavirus infection and spread. *Virol J.* 2005;2:69, doi: 10.1186/1743-422X-2-69.

14. Dyllal J, Coleman CM, Hart BJ, et al. Repurposing of clinically developed drugs for treatment of Middle East respiratory syndrome coronavirus infection. *Antimicrob Agents Chemother.* 2014;58(8):4885–4893.

15. Keyaerts E, Vijgen L, Maes P, Neyts J, Van Ranst M. In vitro inhibition of severe acute respiratory syndrome coronavirus by chloroquine. *Biochem Biophys Res Commun.* 2004;323(1):264–268.

16. Shen L, Niu J, Wang C, et al. High-Throughput Screening and Identification of Potent Broad-Spectrum Inhibitors of Coronaviruses. *J Virol.* 2019;93(12):e00023-19.

17. Kono M, Tatsumi K, Imai AM, Saito K, Kuriyama T, Shirasawa H. Inhibition of human coronavirus 229E infection in human epithelial lung cells (L132) by chloroquine: involvement of p38 MAPK and ERK. *Antiviral Res.* 2008;77(2):150–152.

18. McChesney EW. Animal toxicity and pharmacokinetics of hydroxychloroquine sulfate. *Am J Med.* 1983;75(1A):11–18.

19. McChesney EW, Banks WF Jr, Fabian RJ. Tissue distribution of chloroquine, hydroxychloroquine, and

desethylchloroquine in the rat. *Toxicol Appl Pharmacol.* 1967;10(3):501–513.

# **Final Clinical Study Protocol: KY2020-29**

Version date. 20 February 2020

This is the final version of the protocol in Chinese.

---

# 硫酸羟氯喹治疗新型冠状病毒肺炎的 一项随机、对照、开放的多中心研究 临床研究方案

(V6.0 版)

## 一、研究背景

2019 年 12 月以来，湖北省武汉市陆续发现了多例“不明原因肺炎”患者，后续研究在这些病例中分离到了一种冠状病毒（Coronavirus, CoV），其全基因组序列与 2003 年流行的严重急性呼吸综合征冠状病毒（Severe Acute Respiratory Syndrome Coronavirus, SARS-CoV）相似度达 79.5%，世界卫生组织将其命名为“2019-新型冠状病毒（2019-nCoV, 2019-nCoV）”[1]。随着疫情的蔓延，我国其他地区及境外也相继发现了此类病例[2]。

有效控制病毒复制可以改善疾病进展和临床转归，但迄今为止，目前对 2019-nCoV 感染的肺炎的诊治方案中仍缺乏有效特异的抗冠状病毒药物[3]。尽早使用有潜在抗病毒效应且临床已经证明其在人体使用中良好安全性的药物是解决这一问题的最快方案之一。

硫酸羟氯喹（hydroxychloroquine, HCQ）属 4-氨基喹啉类抗疟药，1944 年在氯喹（chloroquine, CQ）的基础上人工合成了 HCQ，两者的区别在于用羟乙基替代了 CQ 中的一个乙基，使 HCQ 在人体胃肠道吸收更快，体内分布更广。HCQ 最初用于抗疟治疗，1955 年开始用于治疗系统性红斑狼疮，1988 年开始用于治疗类风湿关节炎，其调节免疫的作用及安全性和有效性已经得到了临床的广泛认可[4]。HCQ 在保留原有 CQ 药效的同时，毒性显著降低[5,6]，具有免疫调节、抗炎、抑制细胞增殖和诱变、降低血脂以及抗血栓、降低糖尿病风险等多重作用机制 HCQ 的临床应用范围从风湿免疫性疾病延伸到皮肤、肿瘤等领域[7,8]。同时，在抗病毒方面，CQ 也有明显的治疗作用，可能通过抑制 TNF $\alpha$  和 IL-6，治疗病毒感染引起的急性呼吸窘迫综合征（Acute respiratory distress syndrome, ARDS）[9]。在特殊病毒感染方面，CQ 可减轻艾滋病患者的免疫过度激活。人类免疫缺陷病毒（human immunodeficiency virus, HIV）进入表达 CD4 的浆细胞样树突状细胞（pDCs）；病毒被内吞、去壳，其 RNA 被 toll 样

---

受体 7 (Toll-like receptor-7, TLR-7) 识别; 刺激 TLR-7 促进核内诱导 IFN- $\alpha$  转录的信号级联; 产生 IFN- $\alpha$  有利于 T 细胞等多个细胞亚群的激活, B 细胞和自然杀伤淋巴细胞。氯喹通过在核内体中积累和减少 HIV 介导的 TLR-7 信号传导来降低这一机制的效率[10]。尤其对于高病毒载量的患者, 800mg/d 连续服用 8 周 HCQ 可显著降低免疫激活[11,12]。在 SARS-CoV 和另一种冠状病毒, 中东呼吸综合征冠状病毒病毒 (Middle East Respiratory Syndrome Coronavirus, MERS-CoV) 感染的相关研究中, HCQ 也显示了高剂量使用可能存在的抗病毒疗效[13,14]。有文献提到如果 SARS 再次出现, 推荐 HCQ 立即用于 SARS-CoV 感染的预防和治疗[13]。小鼠研究 CQ 治疗冠状病毒感染, 存活率达 80%以上[14]。而 HCQ 抗病毒的作用机制在于通过提高溶酶体等细胞器的 pH 值, 干扰细胞内铁代谢, 阻止病毒的内吞、脱壳。同时通过升高高尔基体的 pH 值, 抑制病毒蛋白翻译后的修饰, 杀死胞内的病原微生物。CQ 可以抑制 HCoV-229e 感染细胞中 p38 MAPK 的激活。从而抑制 CoV 复制[14,16,17]。在 SARS-CoV 的相关研究中, 也可以通过干扰细胞受体的糖基化, 阻止病毒传播[13]。其药物的安全性和组织中的分布浓度也有很好的表现[18,19]。

本研究拟在确诊的新型冠状病毒肺炎的轻型/普通型/重型患者中, 探索高剂量 HCQ 对新型冠状病毒肺炎的疗效和安全性。本项目拟开展一项前瞻性、多中心、随机、对照的临床试验, 评价该药物在新型冠状病毒肺炎的病毒转阴率、临床症状改善、实验室检查指标改善、预防疾病严重度增加的作用, 预期可证实该药物可作为新型冠状病毒肺炎的轻型/普通型/重型患者抗病毒治疗用药。

## 二、研究内容和方法

### (一) 总体目标

本项目拟以高剂量硫酸羟氯喹片治疗轻型/普通型/重型新型冠状病毒肺炎进行临床研究; 对 360 例轻型/普通型/重型新型冠状病毒肺炎患者进行治疗有效性和安全性评价的临床试验, 全面评价该药物治疗在新型冠状病毒肺炎的临床作用。

### (二) 研究内容和方法

#### 1.1 研究目的



---

评价高剂量硫酸羟氯喹片治疗轻型/普通型/重型新型冠状病毒肺炎的疗效和安全性。

## 1.2 试验内容

### 1.2.1 设计

按照 1:1 比例，共招募 360 例受试者，分为试验组 180 例，对照组 180 例，并以受试者临床分型（轻型/普通型或重型）作为随机分层因素。前瞻性、多中心、随机、开放对照研究。

### 1.2.2 研究人群

入组标准：

- 6) 18 周岁及以上；
- 7) 符合新型冠状病毒肺炎的诊断标准[3]，上或下呼吸道实验室检测 RT-PCR 证实 2019-nCov 核酸检测阳性，可以配合胸部 CT 影像学检查；
- 8) 室内空气下  $\text{SaO}_2/\text{SpO}_2 \leq 94\%$ ，或  $\text{PaO}_2/\text{FiO}_2 < 300 \text{mgHg}$ （适用于重型）；
- 9) 签署知情同意书；
- 10) 28 天内不计划参与其他研究药物的临床研究。

排除标准：

- 1) 年龄  $< 18$  岁；
- 2) 合并其他严重内科疾病如恶性肿瘤、心肝肾疾病、不可控制的代谢性疾病等；
- 3) 不宜胃肠道给药者；
- 4) 妊娠期或哺乳期妇女；
- 5) 对本品成分过敏者；
- 6) 精神状态不能配合观察者或认知障碍者；
- 7) 严重肝病（如 Child Pugh C 级且  $\text{ALT} > 5$  倍）；
- 8) 已知严重肾功能损害的患者（肌酐清除率  $\leq 30 \text{ mL/min}$ ）或连续肾脏替代疗法、血液透析、腹膜透析。

### 1.2.3 用药方法

- 试验组：按照指南推荐的标准治疗基础上，联合使用：第 1 天~第 3 天：口服硫酸羟氯喹

片（100mg/片、200mg/片），每次 400mg，每日 3 次；第 4 天~第 14/21 天：口服硫酸羟氯喹片（100mg/片、200mg/片），每次 400mg，每日 2 次。

- 对照组：按照指南推荐的标准治疗进行治疗。
- 治疗周期：轻型/普通型 14 天，重型 21 天。
- **剂量调整方案：**只有当研究者认为不良事件与研究药物有关时，才需进行剂量调整。若不良事件与研究药物无关，则不要求调整剂量。但是无论在任何情况下，研究者都要依据临床经验酌情判断。根据受试者个体的安全性和耐受性，如果研究者认为继续在给定剂量下使用研究药物可能会加重毒性，则可调整研究药物的剂量，允许暂停用药或剂量下调（仅可降低 1 个剂量水平）。受试者毒性反应恢复后，硫酸羟氯喹片的治疗可在原剂量，或低一级剂量重新开始。

|             | 原剂量水平                     | 调整后剂量水平                  |
|-------------|---------------------------|--------------------------|
| 第 1~3 天     | 1200mg/日<br>3 次/日，400mg/次 | 900mg/日<br>3 次/日，300mg/次 |
| 第 4~14/21 天 | 800mg/日<br>2 次/日，400mg/次  | 600mg/日<br>2 次/日，300mg/次 |

若患者出现病情加重，由研究者评估患者是否从本研究药物中获益，若获益，可继续使用本研究药物至 14/21 天研究结束。

#### 1.2.4 合并用药

治疗新型冠状病毒肺炎指南中推荐的标准治疗药物（但研究药物以外的氯喹和氯喹类药物禁用，如磷酸氯喹）均可使用。若已经使用了氯喹类药物，可停用 48 小时后参加本临床研究。受试者其他基础疾病用药可合并使用。

#### 1.2.5 提前终止

符合以下任何一种情况的均可提前结束研究，并记录结束时间

- ①研究期间出现疾病恶化，经研究者综合评估后需要改变治疗；
- ②药物不良事件导致病情加重的出现；
- ③患者不愿意继续使用研究药物。

## 1.2.6 研究终点

主要终点：

28 天内的新型冠状病毒核酸总体检测转阴率。

对重型受试者亚组同时考虑 28 天内的临床改善率。

- 临床改善：从开始治疗到临床状态（六级分类量表）较入组时下降 2 个级别。

六级分类量表：

| 级别 | 具体描述                                |
|----|-------------------------------------|
| 6  | 死亡                                  |
| 5  | ICU，需要体外膜肺氧合（ECMO）和/或有创机械通气（IMV）    |
| 4  | ICU/住院，需要无创机械通气（NIV）/高流量鼻导管氧疗（HFNC） |
| 3  | 住院，需要氧疗（非 NIV/HFNC）                 |
| 2  | 住院，不需要氧疗                            |
| 1  | 出院                                  |

次要终点：

9) 4、7、10、14、21 天内的新型冠状病毒检测转阴率

10) 28 天内的临床症状改善率

- 临床症状改善：体温恢复正常（腋温 $\leq 36.6^{\circ}\text{C}$ ，或者口温 $\leq 37.2^{\circ}\text{C}$ ，或者肛温或耳温 $\leq 37.8^{\circ}\text{C}$ ）， $\text{SpO}_2$ 恢复正常（不吸氧状态下， $\text{SpO}_2 > 94\%$ ），呼吸道症状消失。

11) 28 天内的实验室指标改善率

- 实验室指标改善：C 反应蛋白（CRP）较基线下降 $\geq 50\%$ ，血沉较基线下降 $\geq 50\%$ ，外周血淋巴细胞绝对计数恢复正常，炎症标记物 IL-6、TNF- $\alpha$  较基线下降 $\geq 50\%$ 。

12) 28 天内的影像学好转率

- 影像学好转：胸部 CT 病灶吸收较基线 $\geq 50\%$ 。

13) 全因死亡

14) 第 7、14、21、28 天的临床状态（重型）

15) 机械通气（IMV、NIV）的持续时间（天）、体外膜氧合的持续时间（天）、氧疗（鼻导管或面罩吸氧）的持续时间（天）、住院时间（天）（重型）

16) 28 天内的临床恶化率（轻型/普通型）

- 临床恶化：转为重型/危重型新型冠状病毒肺炎。

注：重型和危重型新型冠状病毒肺炎的定义[3]：

E. 重型——符合下列任何一条：

7. 呼吸窘迫，RR≥30 次/分；
8. 静息状态下，指氧饱和度≤93%；
9. 动脉血氧分压（PaO<sub>2</sub>）/吸氧浓度（FiO<sub>2</sub>）≤300mmHg（1mmHg=0.133kPa）。

F. 危重型——符合以下情况之一者：

7. 出现呼吸衰竭，且需要机械通气；
8. 出现休克；
9. 合并其他器官功能衰竭需 ICU 监护治疗。

安全性终点：

①不良事件发生率（鉴于硫酸羟氯喹片是临床常用的抗风湿及疟原虫药物，目前相关的不良反应已充分记载，具体如下表格）：其中，在临床常规使用剂量下，胃肠道反应（尤其是腹泻），视网膜病变相对较为常见，但停药后均可逆转。

|          | 硫酸羟氯喹片                                       |
|----------|----------------------------------------------|
| 眼睛       | 长期或者高剂量服用可能会引发不可逆的视网膜损伤以及视觉障碍的风险             |
| 听力       | 耳鸣                                           |
| 肌肉骨骼系统   | 感觉运动障碍、骨骼肌肌病或神经肌病导致进行性弱和近端肌群萎缩、肌腱反射抑制和神经传导异常 |
| 胃肠系统     | 恶心、呕吐、腹泻、腹痛                                  |
| 皮肤和皮下组织等 | 皮疹、瘙痒、皮肤黏膜色素紊乱、毛色改变、脱发等                      |
| 血液系统     | 骨髓衰竭、贫血、再生障碍性贫血、粒细胞增多、白细胞减少、血小板减少等           |
| 中枢神经系统   | 眩晕、眼球震颤、神经性失语、头痛、头晕、癫痫、共济失调和锥体外系疾病           |
| 精神类副作用   | 紧张、易怒、噩梦、精神病、自杀行为                            |
| 心血管系统    | 心肌病并可能导致心力衰竭、QT 间期延长                         |
| 肝脏       | 肝功能指标异常                                      |
| 免疫系统     | 荨麻疹、血管水肿、支气管痉挛                               |
| 新陈代谢     | 食欲下降、低血糖、卟啉症、体重下降                            |

---

## ②退出研究的比例

### 1.2.7 统计学处理

#### 样本量估计:

本研究试验组与对照组随机分配比例为 1:1, 假设病毒核酸转阴时间服从以转阴速度为参数的指数分布。假设对照组的中位转阴时间为 10 天, 治疗组相对于对照组病毒核酸转阴的速度比为 1.43, 即假设治疗组的中位转阴时间为 7 天, 采用成组序贯设计, 在大约 40% 的人群入组时 (至多 40% 事件信息量) 进行一次期中有效性分析, 使用 Lan-Demets 算法的 O'Brien-Fleming 类型的  $\alpha$ -消耗函数以控制总体一类错误率  $\alpha=0.025$  (单侧), 80% 的把握度, 用 Log-rank test 进行检验, 至少需要 248 个转阴事件。假设 75 天完成入组, 计划在最后一例受试者用药 7 天后进行最终分析, 考虑 20% 的脱落率, 本试验需 360 例受试者。

本研究在重型受试者亚组中同时分析 28 天临床改善率。假设对照组临床改善率为 50%, 100 例重型受试者可以至少有 70% 的把握度检测出治疗组 25% 的临床改善率的提高。

#### 分析集:

- 意向性治疗集 (ITT): 定义为所有随机进入试验的受试者。ITT 人群将作为本研究疗效分析的主要分析人群。受试者将基于其计划分配的治疗组来进行分析。
- 符合方案集 (PPS): 符合方案集为 ITT 的子集, 指所有随机入组接受过至少 11 天 (轻型/普通型) / 16 天 (重型) 的治疗, 且无明显影响主要疗效的重大方案偏离的受试者, 构成符合方案分析集。基于 PPS 的分析将作为支持性分析对基于 ITT 的分析进行补充。受试者将基于其计划分配的治疗组来进行分析。
- 安全性数据集 (SS): 定义为所有接受了至少一次试验药物的受试者。安全性分析人群是安全性指标的主要分析人群。受试者将根据其实际分配的治疗组进行分析。

#### 疗效分析:

- 主要疗效分析:

用 Kaplan-Meier 法分析整体转阴率。绘制随时间变化的转阴率的 KM 曲线, 用分层 Log-Rank Test 比较两组曲线, 以评估两组整体疗效。分层因素与随机时使用的分层因素相同。

---

在重型人群中进行亚组分析，考虑主要终点临床改善率的变化。记录各时间点的改善率。用卡方检验对两组中的 28 天临床改善率的差别进行统计检验。作为敏感性分析，也将用 KM 方法进行估算。

- **次要疗效分析：**

计算和报告各组中其他各时间点的病毒核酸转阴率、临床症状改善率、实验室指标改善率、影像学好转率、全因死亡、临床恶化率等比例型终点的受试者比例，以及风险比（RR）及其 95%置信区间。采用 Kaplan-Meier 法分析机械通气/体外膜氧合/氧疗/住院时间和其他 time-to-event 类型的终点。报告中位时间及其 95%置信区间。KM 曲线的比较由 Log-Rank 检验进行。

**安全性分析：**

不良事件将按照编码后的系统器官分类（SOC）和首选术语（PT）分别归纳例数、发生率以及例次。汇总各组 AE、TEAE、SAE 以及 ADR 例数、发生率以及例次。

将汇总特定实验室检查结果、心电图检查、生命体征及体格检查等安全指标的检查值和其相对基线的变化。在适用的情况下，基线检查值与基线后各时间点检查值用交叉表形式呈现。

**期中分析：**

本研究将设立独立数据监查委员会（IDMC）进行期中分析。IDMC 的人员组成、任务责任及实施细节将在 IDMC 章程中规定。

本次研究一共安排两次分析：一次期中分析，一次最终分析。在 Group Sequential Design 中采用 Lan-Demets 算法，使用 O'Brien-Fleming 类型的  $\alpha$ -消耗函数（累积）以控制总体 I 类错误率 0.05。

第一次期中分析在 40%（大约 150 人）的受试者入组 7 天后进行，主要目的是进行样本量重估和优效性评估，显著性水平（p-value boundary）0.00079（双侧）。

最终分析在达到 248 个转阴事件后进行，显著性水平（p-value boundary）为 0.04974（双侧）。

每次分析的实际  $\alpha$  消耗和显著性水平将根据分析时实际观察到的确切事件数进行调整。

### 1.2.8 研究流程图

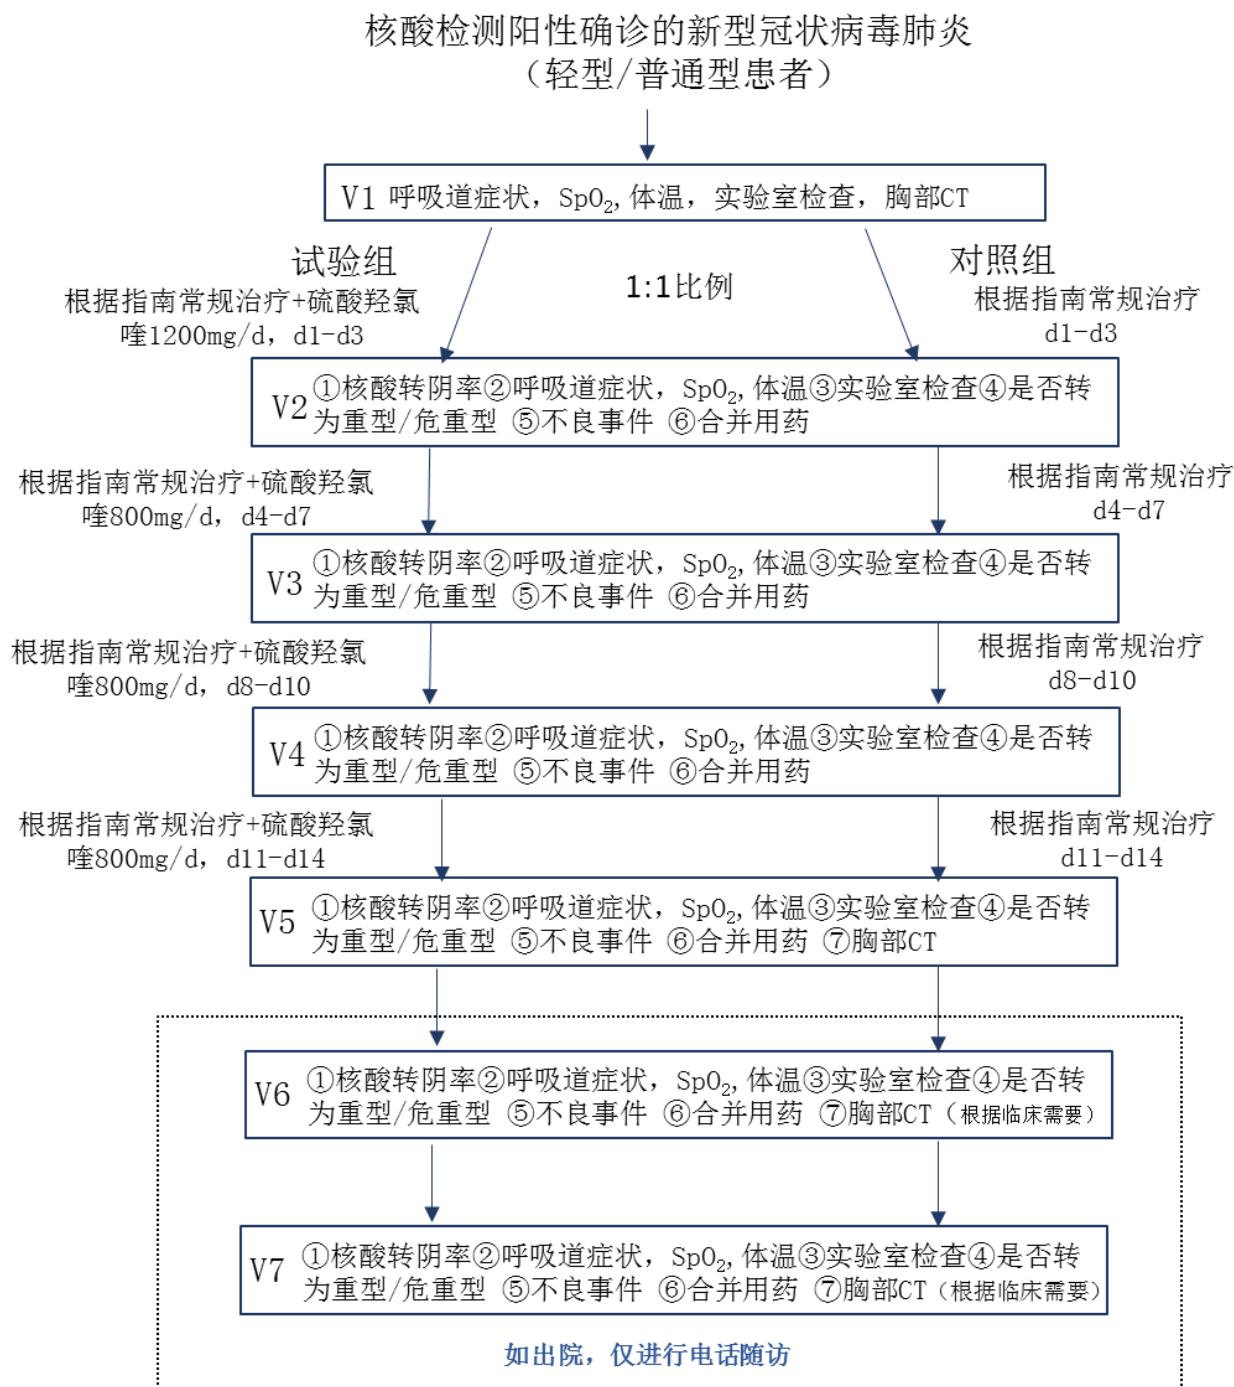

## 核酸检测阳性确诊的新型冠状病毒肺炎 (重型患者)

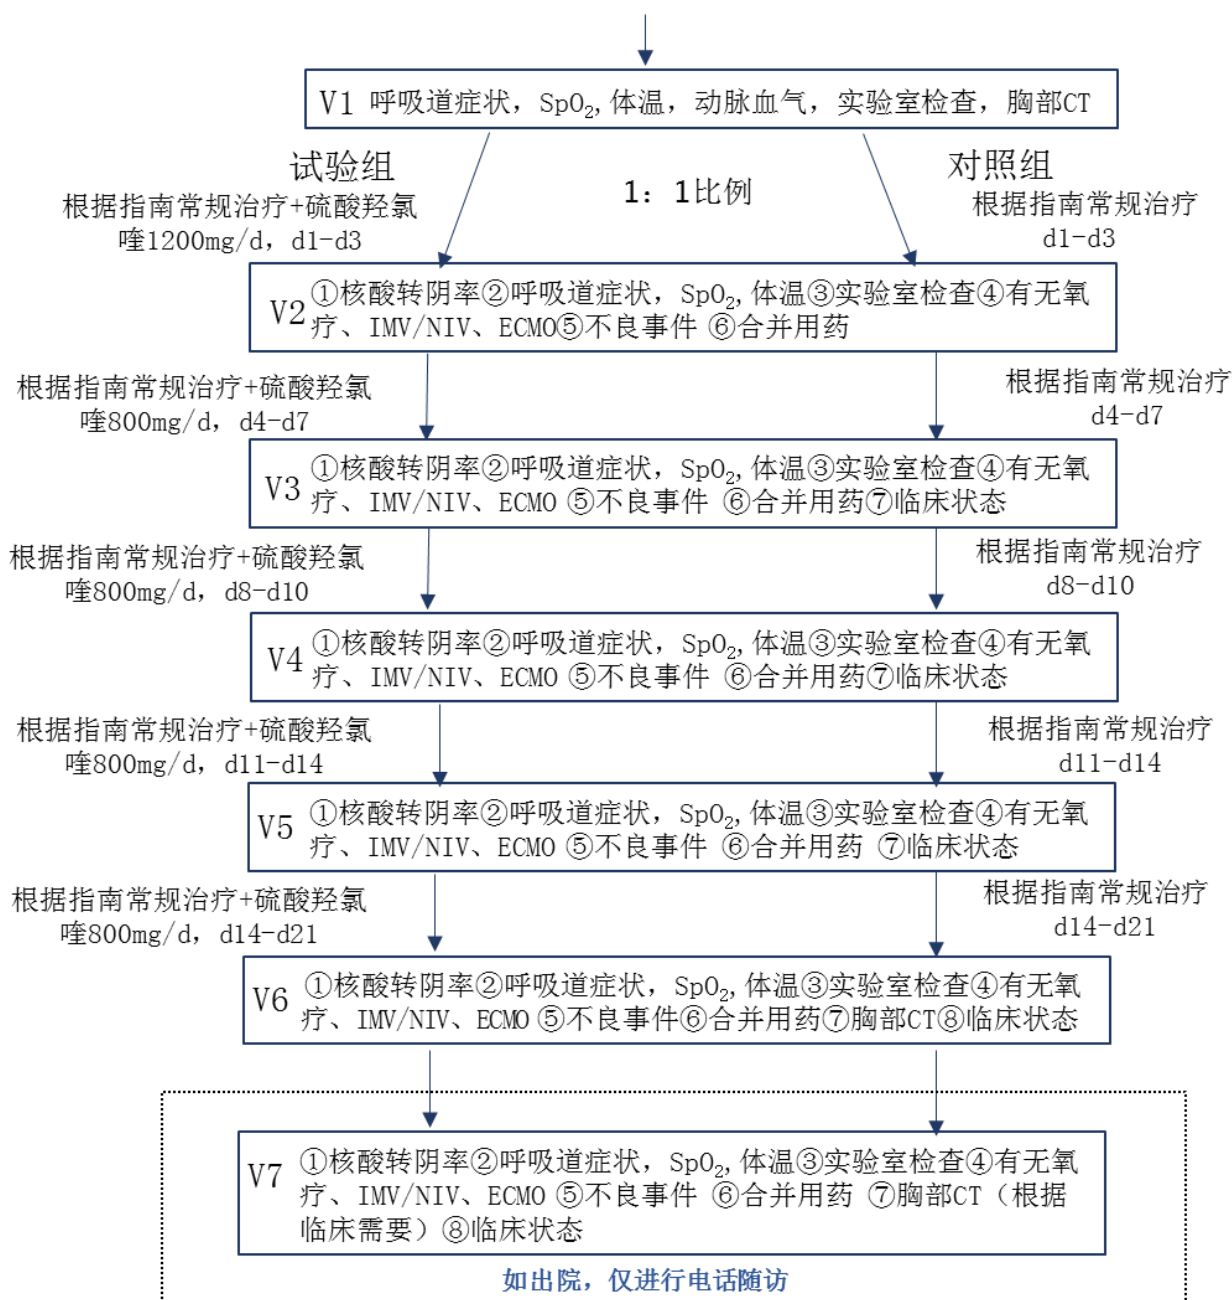



### 1.3 临床研究流程图

试验流程图（轻型/普通型）

| 研究流程                                                                                                                     | 筛选期/<br>治疗期       | 治疗期（2-14 天） |       |        |        | 延伸随访期 <sup>[13]</sup> |        |
|--------------------------------------------------------------------------------------------------------------------------|-------------------|-------------|-------|--------|--------|-----------------------|--------|
|                                                                                                                          |                   | V1          | V2    | V3     | V4     | V5                    | V6     |
| 访视名称                                                                                                                     | D-3~1             | D4±1d       | D7±1d | D10±1d | D14±1d | D21±2d                | D28±2d |
| 知情同意                                                                                                                     | ×                 |             |       |        |        |                       |        |
| 确认入选/排除标准                                                                                                                | ×                 |             |       |        |        |                       |        |
| 受试者随机化                                                                                                                   | ×                 |             |       |        |        |                       |        |
| 收集人口学资料 <sup>[1]</sup>                                                                                                   | ×                 |             |       |        |        |                       |        |
| 收集病史和伴随疾病治疗 <sup>[2]</sup>                                                                                               | ×                 |             |       |        |        |                       |        |
| 体格检查 <sup>[3]</sup>                                                                                                      | ×                 |             |       |        | ×      | ×                     | ×      |
| 生命体征 <sup>[4]</sup>                                                                                                      | ×                 | ×           | ×     | ×      | ×      | ×                     | ×      |
| 12-导联心电图                                                                                                                 | × <sup>[11]</sup> |             |       |        | ×      | ×                     | ×      |
| CRP, 血沉                                                                                                                  | × <sup>[11]</sup> | ×           | ×     | ×      | ×      | ×                     | ×      |
| TNF- $\alpha$ , IL-6                                                                                                     | × <sup>[11]</sup> | ×           | ×     | ×      | ×      | ×                     | ×      |
| 血常规 <sup>[5]</sup>                                                                                                       | × <sup>[11]</sup> | ×           | ×     | ×      | ×      | ×                     | ×      |
| 尿常规 <sup>[6]</sup>                                                                                                       | × <sup>[11]</sup> |             |       |        | ×      | ×                     | ×      |
| 血生化 <sup>[7]</sup><br>(肝功能、肾功能、心肌酶)                                                                                      | × <sup>[11]</sup> | ×           | ×     | ×      | ×      | ×                     | ×      |
| 凝血功能 <sup>[8]</sup>                                                                                                      | × <sup>[11]</sup> | ×           | ×     | ×      | ×      | ×                     | ×      |
| 新型冠状病毒核酸检测 <sup>[9]</sup>                                                                                                | × <sup>[12]</sup> | ×           | ×     | ×      | ×      | ×                     | ×      |
| 指脉氧饱和度(不吸氧情况下)                                                                                                           | ×                 | ×           | ×     | ×      | ×      | ×                     | ×      |
| 尿或血清 HCG<br>(仅适用于育龄女性)                                                                                                   | × <sup>[11]</sup> |             |       |        | ×      |                       |        |
| 胸部 CT                                                                                                                    | × <sup>[11]</sup> |             |       |        | ×      | 根据临床需要进行              |        |
| 有无呼吸道症状                                                                                                                  | ×                 | ×           | ×     | ×      | ×      | ×                     | ×      |
| 试验用药情况 <sup>[10]</sup>                                                                                                   | ×                 | ×           | ×     | ×      | ×      |                       |        |
| 是否转为重型/危重型肺炎                                                                                                             |                   | ×           | ×     | ×      | ×      | ×                     | ×      |
| 合并用药                                                                                                                     | ×                 | ×           | ×     | ×      | ×      | ×                     | ×      |
| 不良事件                                                                                                                     | ×                 | ×           | ×     | ×      | ×      | ×                     | ×      |
| 14. 人口学资料记录包括出生日期、性别、民族；<br>15. 包括现病史和既往史，以及伴随疾病治疗；<br>16. 体格检查包括整体外观、头、眼、耳、鼻、喉、颈部及甲状腺、皮肤、心血管系统、胸部及肺、腹部、神经系统、骨骼肌系统及淋巴系统； |                   |             |       |        |        |                       |        |

17. 生命体征：体温，呼吸频率，脉搏，血压；体温测量记录日最高体温，试验期间体温测量方法必须与基线保持一致；
18. 血常规：红细胞计数（RBC）、血红蛋白浓度（HGB）、白细胞计数（WBC）、血小板计数（PLT）、中性粒细胞计数（ANC）、淋巴细胞计数（LY）、单核细胞计数（MO）、嗜酸性粒细胞计数（EO）、嗜碱性粒细胞计数（BA）；
19. 尿常规：尿 pH 值、尿红细胞、尿白细胞、尿蛋白、尿葡萄糖、尿酮体；
20. 血生化：谷丙转氨酶（ALT）、谷草转氨酶（AST）、总胆红素（TBIL）、白蛋白（ALB）、 $\gamma$ -谷氨酰转肽酶（GGT）、乳酸脱氢酶（LDH）、肌酸激酶（CK）、肌酸激酶同工酶（CK-MB）、血尿素氮（BUN）、血肌酐（CR）；
21. 凝血功能：凝血酶原时间（PT）、活化部分凝血酶时间（APTT）、凝血酶时间（TT）血浆纤维蛋白原（Fbg）、国际标准化比率（INR）；
22. 研究者如果进行计划外访视的病毒核酸检测，数据结果需记录在 CRF 中；
23. 每天记录受试者用药情况，是否漏服、多服；
24. 如果受试者首次用药前 3 天内有符合要求的检查结果，获得研究者认可后，则该受试者筛选期不需要再进行检查。
25. 如果受试者有报告日期在首次用药前 5 天内的核酸检查结果，获得研究者认可后，则该受试者筛选期不需要再进行检查。
26. 对于已出院的受试者进行电话随访，仅收集合并用药、不良事件。

### 试验流程图（重型）

| 研究流程                       | 筛选期/<br>治疗期       | 治疗期（2-21 天） |       |        |        |        | 延伸随访期 <sup>[13]</sup> |
|----------------------------|-------------------|-------------|-------|--------|--------|--------|-----------------------|
|                            |                   | V2          | V3    | V4     | V5     | V6     |                       |
| 访视名称                       | V1                | V2          | V3    | V4     | V5     | V6     | V7                    |
| 访视时间                       | D-3~1             | D4±1d       | D7±1d | D10±1d | D14±1d | D21±2d | D28±2d                |
| 知情同意                       | ×                 |             |       |        |        |        |                       |
| 确认入选/排除标准                  | ×                 |             |       |        |        |        |                       |
| 受试者随机化                     | ×                 |             |       |        |        |        |                       |
| 收集人口学资料 <sup>[1]</sup>     | ×                 |             |       |        |        |        |                       |
| 收集病史和伴随疾病治疗 <sup>[2]</sup> | ×                 |             |       |        |        |        |                       |
| 体格检查 <sup>[3]</sup>        | ×                 |             |       |        |        | ×      | ×                     |
| 生命体征 <sup>[4]</sup>        | ×                 | ×           | ×     | ×      | ×      | ×      | ×                     |
| 12-导联心电图                   | × <sup>[11]</sup> |             |       |        |        | ×      | ×                     |
| CRP, 血沉                    | × <sup>[11]</sup> | ×           | ×     | ×      | ×      | ×      | ×                     |
| TNF- $\alpha$ , IL-6       | × <sup>[11]</sup> | ×           | ×     | ×      | ×      | ×      | ×                     |
| 血常规 <sup>[5]</sup>         | × <sup>[11]</sup> | ×           | ×     | ×      | ×      | ×      | ×                     |
| 尿常规 <sup>[6]</sup>         | × <sup>[11]</sup> |             |       |        |        | ×      | ×                     |
| 血生化 <sup>[7]</sup>         | × <sup>[11]</sup> | ×           | ×     | ×      | ×      | ×      | ×                     |

|                                                                                                                                                                                                                                                                                                                                                                                                                                                                                                                                                                                                                                                                                                                                                                                                                                                                                                                 |                   |          |   |   |   |   |          |
|-----------------------------------------------------------------------------------------------------------------------------------------------------------------------------------------------------------------------------------------------------------------------------------------------------------------------------------------------------------------------------------------------------------------------------------------------------------------------------------------------------------------------------------------------------------------------------------------------------------------------------------------------------------------------------------------------------------------------------------------------------------------------------------------------------------------------------------------------------------------------------------------------------------------|-------------------|----------|---|---|---|---|----------|
| (肝功能、肾功能、心肌酶)                                                                                                                                                                                                                                                                                                                                                                                                                                                                                                                                                                                                                                                                                                                                                                                                                                                                                                   |                   |          |   |   |   |   |          |
| 凝血功能 <sup>[8]</sup>                                                                                                                                                                                                                                                                                                                                                                                                                                                                                                                                                                                                                                                                                                                                                                                                                                                                                             | x <sup>[11]</sup> | x        | x | x | x | x | x        |
| 新型冠状病毒核酸检测 <sup>[9]</sup>                                                                                                                                                                                                                                                                                                                                                                                                                                                                                                                                                                                                                                                                                                                                                                                                                                                                                       | x <sup>[12]</sup> | x        | x | x | x | x | x        |
| 指脉氧饱和度 (不吸氧情况下)                                                                                                                                                                                                                                                                                                                                                                                                                                                                                                                                                                                                                                                                                                                                                                                                                                                                                                 | x                 | x        | x | x | x | x | x        |
| 动脉血气分析                                                                                                                                                                                                                                                                                                                                                                                                                                                                                                                                                                                                                                                                                                                                                                                                                                                                                                          | x <sup>[11]</sup> | 根据临床需要进行 |   |   |   |   |          |
| 尿或血清 HCG<br>(仅适用于育龄女性)                                                                                                                                                                                                                                                                                                                                                                                                                                                                                                                                                                                                                                                                                                                                                                                                                                                                                          | x <sup>[11]</sup> |          |   |   |   | x |          |
| 胸部 CT                                                                                                                                                                                                                                                                                                                                                                                                                                                                                                                                                                                                                                                                                                                                                                                                                                                                                                           | x <sup>[11]</sup> |          |   |   |   | x | 根据临床需要进行 |
| 有无呼吸道症状                                                                                                                                                                                                                                                                                                                                                                                                                                                                                                                                                                                                                                                                                                                                                                                                                                                                                                         | x                 | x        | x | x | x | x | x        |
| 试验用药情况 <sup>[10]</sup>                                                                                                                                                                                                                                                                                                                                                                                                                                                                                                                                                                                                                                                                                                                                                                                                                                                                                          | x                 | x        | x | x | x | x |          |
| 临床状态                                                                                                                                                                                                                                                                                                                                                                                                                                                                                                                                                                                                                                                                                                                                                                                                                                                                                                            | x                 |          | x |   | x | x | x        |
| 有无 IMV/NIV、ECMO、氧疗                                                                                                                                                                                                                                                                                                                                                                                                                                                                                                                                                                                                                                                                                                                                                                                                                                                                                              | x                 | x        | x | x | x | x | x        |
| 合并用药                                                                                                                                                                                                                                                                                                                                                                                                                                                                                                                                                                                                                                                                                                                                                                                                                                                                                                            | x                 | x        | x | x | x | x | x        |
| 不良事件                                                                                                                                                                                                                                                                                                                                                                                                                                                                                                                                                                                                                                                                                                                                                                                                                                                                                                            | x                 | x        | x | x | x | x | x        |
| <ol style="list-style-type: none"> <li>1. 人口学资料记录包括出生日期、性别、民族；</li> <li>2. 包括现病史和既往史，以及伴随疾病治疗；</li> <li>3. 体格检查包括整体外观、头、眼、耳、鼻、喉、颈部及甲状腺、皮肤、心血管系统、胸部及肺、腹部、神经系统、骨骼肌系统及淋巴系统；</li> <li>4. 生命体征：体温，呼吸频率，脉搏，血压；体温测量记录日最高体温，试验期间体温测量方法必须与基线保持一致；</li> <li>5. 血常规：红细胞计数 (RBC)、血红蛋白浓度 (HGB)、白细胞计数 (WBC)、血小板计数 (PLT)、中性粒细胞计数 (ANC)、淋巴细胞计数 (LY)、单核细胞计数 (MO)、嗜酸性粒细胞计数 (EO)、嗜碱性粒细胞计数 (BA)；</li> <li>6. 尿常规：尿 pH 值、尿红细胞、尿白细胞、尿蛋白、尿葡萄糖、尿酮体；</li> <li>7. 血生化：谷丙转氨酶 (ALT)、谷草转氨酶 (AST)、总胆红素 (TBIL)、白蛋白 (ALB)、<math>\gamma</math>-谷氨酰转肽酶 (GGT)、乳酸脱氢酶 (LDH)、肌酸激酶 (CK)、肌酸激酶同工酶 (CK-MB)、血尿素氮 (BUN)、血肌酐 (CR)；</li> <li>8. 凝血功能：凝血酶原时间 (PT)、活化部分凝血酶时间 (APTT)、凝血酶时间 (TT) 血浆纤维蛋白原 (Fbg)、国际标准化比率 (INR)；</li> <li>9. 研究者如果进行计划外访视的病毒核酸检测，数据结果需记录在 CRF 中；</li> <li>10. 每天记录受试者用药情况，是否漏服、多服；</li> <li>11. 如果受试者首次用药前 3 天内有符合要求的检查结果，获得研究者认可后，则该受试者筛选期不需要再进行检查。</li> <li>12. 如果受试者有报告日期在首次用药前 5 天内的核酸检查结果，获得研究者认可后，则该受试者筛选期不需要再进行检查。</li> </ol> |                   |          |   |   |   |   |          |

13. 对于已出院的受试者进行电话随访，仅收集合并用药、不良事件。

### 三、受试者的风险与获益风险

本项目是一项随机对照开放性研究，硫酸羟氯喹片作为已经上市数年的免疫抑制剂和抗病原微生物药物，安全性和疗效已经得到了一定的认可，预计不会给受试者带来额外的风险。

可能的获益：

1. 参与本研究的受试者可能从治疗组获益，对照组采样根据指南的常规治疗，故均可获得现有阶段最佳的治疗疗效。
2. 在参加研究期间，受试者相关检查费用和研究药物的费用将由申办方承担。

保密：

受试者的个人信息记录将被保密，根据法律和法规，将不会被公开。如果研究结果发表，受试者的个人身份仍将保密。

### 参考文献：

1. Zhou P, Yang XL, Wang XG, et al. A pneumonia outbreak associated with a new coronavirus of probable bat origin [published online ahead of print, 2020 Feb 3]. *Nature*. 2020; doi:10.1038/s41586-020-2012-7
2. Wang C, Horby PW, Hayden FG, Gao GF. A novel coronavirus outbreak of global health concern [published online ahead of print, 2020 Jan 24]. *Lancet*. 2020; doi:10.1016/S0140-6736(20)30185-9.
3. 国家卫生健康委员会. 新型冠状病毒感染的肺炎诊疗方案（试行第六版），[http://www.gov.cn/zhengce/zhengceku/2020-02/05/content\\_5474791.html](http://www.gov.cn/zhengce/zhengceku/2020-02/05/content_5474791.html), 2020.02.05 发行
4. Leden I. Antimalarial drugs-350 years. *Scand J Rheumatol*. 1981;10(4):307–312.
5. Rainsford KD, Parke AL, Clifford-Rashotte M, et al. Therapy and pharmacological properties of hydroxychloroquine and chloroquine in treatment of systemic lupus erythematosus, rheumatoid arthritis and related diseases. *Inflammopharmacology*. 2015;23(5):231–269
6. 赵义,李小霞, 用辩证的眼光看待硫酸羟氯喹的用药安全, *药物不良反应杂志* 2015;17(3): 164-166.
7. Ben-Zvi I, Kivity S, Langevitz P, Shoenfeld Y. Hydroxychloroquine: from malaria to autoimmunity. *Clin Rev*

---

Allergy Immunol. 2012;42(2):145–153.

8. Olsen NJ, Schleich MA, Karp DR. Multifaceted effects of hydroxychloroquine in human disease. *Semin Arthritis Rheum.* 2013;43(2):264–272.

9. Savarino A, Boelaert JR, Cassone A, Majori G, Cauda R. Effects of chloroquine on viral infections: an old drug against today's diseases?. *Lancet Infect Dis.* 2003;3(11):722–727.

10. Savarino A, Gennero L, Sperber K, Boelaert JR. The anti-HIV-1 activity of chloroquine. *J Clin Virol.* 2001;20(3):131–135.

11. Savarino A, Shytaj IL. Chloroquine and beyond: exploring anti-rheumatic drugs to reduce immune hyperactivation in HIV/AIDS. *Retrovirology.* 2015;12:51, doi: 10.1186/s12977-015-0178-0.

12. Akpovwa H. Chloroquine could be used for the treatment of filoviral infections and other viral infections that emerge or emerged from viruses requiring an acidic pH for infectivity. *Cell Biochem Funct.* 2016;34(4):191–196.

13. Vincent MJ, Bergeron E, Benjannet S, et al. Chloroquine is a potent inhibitor of SARS coronavirus infection and spread. *Virol J.* 2005;2:69, doi: 10.1186/1743-422X-2-69.

14. Dyllal J, Coleman CM, Hart BJ, et al. Repurposing of clinically developed drugs for treatment of Middle East respiratory syndrome coronavirus infection. *Antimicrob Agents Chemother.* 2014;58(8):4885–4893.

15. Keyaerts E, Vijgen L, Maes P, Neyts J, Van Ranst M. In vitro inhibition of severe acute respiratory syndrome coronavirus by chloroquine. *Biochem Biophys Res Commun.* 2004;323(1):264–268.

16. Shen L, Niu J, Wang C, et al. High-Throughput Screening and Identification of Potent Broad-Spectrum Inhibitors of Coronaviruses. *J Virol.* 2019;93(12):e00023-19.

17. Kono M, Tatsumi K, Imai AM, Saito K, Kuriyama T, Shirasawa H. Inhibition of human coronavirus 229E infection in human epithelial lung cells (L132) by chloroquine: involvement of p38 MAPK and ERK. *Antiviral Res.* 2008;77(2):150–152.

18. McChesney EW. Animal toxicity and pharmacokinetics of hydroxychloroquine sulfate. *Am J Med.* 1983;75(1A):11–18.

19. McChesney EW, Banks WF Jr, Fabian RJ. Tissue distribution of chloroquine, hydroxychloroquine, and

---

desethylchloroquine in the rat. *Toxicol Appl Pharmacol.* 1967;10(3):501–513.

---

## **Summary of Protocol changes from: KY2020-29**

This is the translated version of the final protocol originally written in Chinese.

# Evaluation of the Efficacy and Safety of Hydroxychloroquine Sulfate in Adult Patients With 2019-nCoV Respiratory Infection: A Multicenter Randomized Study

## SUMMARY OF CHANGES HISTORY

Protocol Version: 1.0-6.0

### Key Changes:

1. The name of the study drug hydroxychloroquine in the original version change to hydroxychloroquine sulfate in the newest version.
2. Introduction was modified based on updating knowledge on 2019-nCoV and Hydroxychloroquine
3. The sample size of 200 cases in the original version was replaced by 360 cases in the newest version based on the alternative hypothesis of a 30% reduction of time to virus nucleic acid negativity. Under the exponential distribution, this benefit translates to a reduction in median time to virology negativity from 10 days to 7 days. A total of 248 events would provide a power of 80% to detect a 30% reduction of hazard ratio (control vs. treatment) of 0.70 with a Log-Rank test, assuming a two-sided significance level of 5%. A 75-day accrual period and an additional 7-day follow-up are assumed. The sample size calculation has also taken into consideration an annual dropout rate of 20%.
4. In the original version of the protocol, patients with severe pneumonia were excluded. However, considering the anti-inflammatory property of HCQ favoring disease regression, we decided to change exclusion criteria in order to include patients with severe type of pneumonia. Stratified random sampling was then applied to stratify all eligible patients according to the disease severity (mild-to-moderate or severe) followed by random assignment (in a 1:1 ratio) in each stratum to ensure balanced distribution of disease severity between treatment (HCQ plus SOC) and control (SOC only) groups.
5. In the original version of the protocol, age of patients was restricted to 14 or higher. However, given no data available of COVID-19 in adolescents, we decided to focus on adult patients without risking younger patients and lifted the threshold of age limitation to 18 years.
6. Patients with severe liver disease and renal diseases were excluded due to safety concerns of using hydroxychloroquine in this population.
7. In the 4th version, "Onset of illness  $\leq 12$  days" was added to focus on as earlier stage of COVID-19 as possible. However, in hospitalized patients, this criterion would rule out too many patients that could previously participate in. We therefore remove this criterion in last version.
8. In the original version, the study drug was orally administrated 2 tablets/time of hydroxychloroquine (250mg/ tablet), twice a day, from Day1-Day3 followed by 1 tablet/time of hydroxychloroquine (250mg/ tablet) , twice a day, from Day4-Day10. In the newest version, the study drug changed to orally administrated hydroxychloroquine sulfate tablets (100mg/ tablet) 4 tablets /time, three times a day, from day 1 to day 3 followed by hydroxychloroquine sulfate (100mg/ tablet), 4 tablets/time, twice a day, from Day 4 ~ day 14( for mild-to-moderate patients), from Day 4 ~ day 21(for severe patients).



9. Concomitant anti-viral treatments were forbidden after randomization in the original version. However, considering the fact that these drugs are recommended as standard-of-care in the national guideline, we decided to remove this restriction in the later version. Moreover, usage of chloroquine was prohibited after randomization. If the subject had already used chloroquine medication prior to randomization, he or she can participate in this clinical study after 48 hours of chloroquine medication.

10. In the newest version, addition to the secondary efficacy endpoint: time to negative of the novel coronavirus nucleic acid detection (day) and rate of negative percentage of the novel coronavirus detection of the treatment day 4, day 7, day 14 & day 21.

11. In the original version, the clinical symptom improvement as one of the secondary study endpoints was described as respiratory symptom reduction  $\geq 50\%$ . In the newest version, this was described as respiratory symptom disappearance.

12. Add six-level classification scale for evaluation the clinical severity of subjects with severe type of 2019-nCoV pneumonia: Level specific description are as follows:

Score 6: death; Score 5: ICU administration and/or requiring extracorporeal membrane pulmonary oxygenation (ECMO) and/or invasive mechanical ventilation (IMV); Score 4: ICU/ hospitalization requiring non-invasive mechanical ventilation (NIV)/high-flow nasal catheter oxygen therapy (HFNC); Score 3: Hospitalization, requiring oxygen therapy (non-niv /HFNC); Score 2: Hospitalization, no need of oxygen therapy; Score 1: discharge from the hospital.

13. Add details to safety end point in the newest version: Gastrointestinal reactions (especially diarrhea) and retinopathy are relatively common at clinically prescribed doses, but can be reversed after withdrawal. Long-term or high doses may cause irreversible retinal damage and the risk of visual impairment.

14. Add secondary endpoint for subject with severe type of 2019-nCoV pneumonia: All-cause mortality.

15. Add secondary endpoint for subject with severe type of 2019-nCoV pneumonia: clinical status on days 7, 14, 21 and 28.

16. Add secondary endpoint for subject with severe type of 2019-nCoV pneumonia: duration of mechanical ventilation (IMV, NIV) (days), extracorporeal membrane oxygenation (days), oxygen therapy (nasal catheter or mask oxygen) (days), hospitalization (days).

---

## **Original Statistical Analysis Plan: KY2020-29**

Version date. 20 February 2020

No amendment of this statistical analysis plan until the  
study completion.

---

**Evaluation of the Efficacy and Safety of  
Hydroxychloroquine sulfate in Adult Patients With  
2019-nCoV Respiratory Infection: A Multicenter,  
Randomized, Controlled Study**

**Protocol Number: KY2020-29**

**Statistical Analysis Plan**

**Version: 1.0**

**Date: 2020.02.20**

---

## Content

|           |                                                         |           |
|-----------|---------------------------------------------------------|-----------|
| <b>1</b>  | <b>PRIMARY OBJECTIVE</b> .....                          | <b>4</b>  |
| <b>2</b>  | <b>STUDY DESIGN</b> .....                               | <b>4</b>  |
| 2.1       | DESIGN.....                                             | 4         |
| 2.2       | RANDOMIZATION .....                                     | 4         |
| 2.3       | VISIT SCHEDULES .....                                   | 5         |
| <b>3</b>  | <b>ENDPOINTS</b> .....                                  | <b>9</b>  |
| 3.1       | PRIMARY ENDPOINTS .....                                 | 9         |
| 3.2       | SECONDARY ENDPOINT .....                                | 9         |
| 3.3       | SAFETY ENDPOINTS .....                                  | 10        |
| <b>4</b>  | <b>SAMPLE SIZE JUSTIFICATION</b> .....                  | <b>11</b> |
| <b>5</b>  | <b>ANALYSIS SET</b> .....                               | <b>11</b> |
| <b>6</b>  | <b>STATISTICAL ANALYSIS PLAN</b> .....                  | <b>11</b> |
| 6.1       | GENERAL ANALYSIS METHOD .....                           | 11        |
| 6.2       | IMPUTATION OF MISSING DATA.....                         | 12        |
| 6.3       | THE DEFINITION OF BASELINE.....                         | 14        |
| 6.4       | DISPOSITION.....                                        | 14        |
| 6.4.1     | Disposition Information .....                           | 14        |
| 6.5       | PROTOCOL DEVIATIONS .....                               | 14        |
| 6.6       | SUBJECT INFORMATION .....                               | 15        |
| 6.6.1     | Demographics and Baseline Characteristics .....         | 15        |
| 6.6.2     | Disease Characteristics .....                           | 15        |
| 6.6.3     | Medical History .....                                   | 15        |
| 6.6.4     | Medical Allergy History.....                            | 15        |
| 6.6.5     | Historical/Concomitant Medications .....                | 15        |
| 6.6.6     | Historical/Concomitant Treatment(non-Medications) ..... | 16        |
| <b>7</b>  | <b>EFFICACY</b> .....                                   | <b>16</b> |
| 7.1.1     | Primary Efficacy Analysis .....                         | 16        |
| 7.1.2     | Secondary Efficacy Analysis .....                       | 17        |
| <b>8</b>  | <b>SAFETY</b> .....                                     | <b>18</b> |
| 8.1.1     | Drug Exposure .....                                     | 18        |
| 8.1.2     | Adverse Event.....                                      | 18        |
| 8.1.3     | Clinical Laboratory Tests .....                         | 19        |
| 8.1.4     | Electrocardiogram (ECG) .....                           | 20        |
| 8.1.5     | Vital Signs.....                                        | 20        |
| 8.1.6     | Physical Examination Findings.....                      | 20        |
| <b>9</b>  | <b>INTERIM ANALYSIS</b> .....                           | <b>20</b> |
| <b>10</b> | <b>TFL SHELLS</b> .....                                 | <b>21</b> |
| <b>11</b> | <b>REFERENCES</b> .....                                 | <b>21</b> |

---

## ABBREVIATIONS

---

|        |                                              |
|--------|----------------------------------------------|
| ADR    | Adverse Drug Reaction                        |
| AE     | adverse event                                |
| CI     | Confidence Interval                          |
| CM     | Concomitant Medication                       |
| CRF    | Case Report Form                             |
| DBL    | Database Lock                                |
| ITT    | Intended-to-treat                            |
| MedDRA | Medical Dictionary for Regulatory Activities |
| PPS    | Per Protocol                                 |
| PT     | Preferred Term                               |
| SAE    | Serious adverse event                        |
| SAP    | Statistical Analysis Plan                    |
| SOC    | System Organ Class                           |
| SS     | Safety Set                                   |
| TEAE   | Treatment-emergent Adverse Event             |
| WHO    | World Health Organization                    |

---

---

## **1 Primary objective**

The primary objective of this study is to evaluate the efficacy and safety of high dose of HCQ sulfate in patients with 2019-nCoV respiratory infection by comparisons between the HCQ group and the control group.

## **2 Study Design**

### **2.1 Design**

This trial was a prospective, multicenter, open-label, randomized trial of patients with 2019-nCoV. The trial enrolled 360 patients with 1:1 randomization ratio stratified by disease severity (mild/moderate/severe) to receive either standard-of-care (SOC) or SOC plus HCQ.

### **2.2 Randomization**

The eligible patients will be randomly assigned to one of the treatment arms with ratio 1:1. The randomization number will be generated by computer and implemented by random envelopes. The stratification factor includes severity of disease (mild/moderate and severe).

## 2.3 Visit Schedules

**Table 2-1 Time and Events Schedule (mild/moderate subgroup)**

| Evaluation / Procedure                                                             | Screen/<br>Treatment | Treatment and follow-up (Day 2-<br>14) |       |        |        | Extended<br>follow-up <sup>[13]</sup>         |        |
|------------------------------------------------------------------------------------|----------------------|----------------------------------------|-------|--------|--------|-----------------------------------------------|--------|
|                                                                                    |                      | V1                                     | V2    | V3     | V4     | V5                                            | V6     |
| Visit                                                                              | D-3~1                | D4±1d                                  | D7±1d | D10±1d | D14±1d | D21±2d                                        | D28±2d |
| Informed Consent                                                                   | ×                    |                                        |       |        |        |                                               |        |
| I/E Criteria                                                                       | ×                    |                                        |       |        |        |                                               |        |
| Randomization                                                                      | ×                    |                                        |       |        |        |                                               |        |
| Demographics <sup>[1]</sup>                                                        | ×                    |                                        |       |        |        |                                               |        |
| Epidemiological and<br>medical history <sup>[2]</sup>                              | ×                    |                                        |       |        |        |                                               |        |
| Physical examination <sup>[3]</sup>                                                | ×                    |                                        |       |        | ×      | ×                                             | ×      |
| Vital signs <sup>[4]</sup>                                                         | ×                    | ×                                      | ×     | ×      | ×      | ×                                             | ×      |
| 12-lead<br>electrocardiogram                                                       | × <sup>[11]</sup>    |                                        |       |        | ×      | ×                                             | ×      |
| CRP, ESR                                                                           | × <sup>[11]</sup>    | ×                                      | ×     | ×      | ×      | ×                                             | ×      |
| TNF- $\alpha$ , IL-6                                                               | × <sup>[11]</sup>    | ×                                      | ×     | ×      | ×      | ×                                             | ×      |
| CBC with differential <sup>[5]</sup>                                               | × <sup>[11]</sup>    | ×                                      | ×     | ×      | ×      | ×                                             | ×      |
| Urinalysis <sup>[6]</sup>                                                          | × <sup>[11]</sup>    |                                        |       |        | ×      | ×                                             | ×      |
| Blood chemistry <sup>[7]</sup><br>(hepatic and kidney panel,<br>Myocardial enzyme) | × <sup>[11]</sup>    | ×                                      | ×     | ×      | ×      | ×                                             | ×      |
| Coagulation panel <sup>[8]</sup>                                                   | × <sup>[11]</sup>    | ×                                      | ×     | ×      | ×      | ×                                             | ×      |
| 2019-nCoV RT-PCR <sup>[9]</sup>                                                    | × <sup>[12]</sup>    | ×                                      | ×     | ×      | ×      | ×                                             | ×      |
| Pulse oximetry (on room<br>air)                                                    | ×                    | ×                                      | ×     | ×      | ×      | ×                                             | ×      |
| Pregnancy Test (Serum<br>or Urine hCG)                                             | × <sup>[11]</sup>    |                                        |       |        | ×      |                                               |        |
| Chest CT                                                                           | × <sup>[11]</sup>    |                                        |       |        | ×      | Optional ( <i>as per<br/>clinical needs</i> ) |        |
| Respiratory symptom<br>(Y/N)                                                       | ×                    | ×                                      | ×     | ×      | ×      | ×                                             | ×      |
| Study drug<br>administration <sup>[10]</sup>                                       | ×                    | ×                                      | ×     | ×      | ×      |                                               |        |
| Progression to<br>severe/critically severe<br>type (Y/N)                           |                      | ×                                      | ×     | ×      | ×      | ×                                             | ×      |
| Record of SMT                                                                      | ×                    | ×                                      | ×     | ×      | ×      | ×                                             | ×      |
| AE Assessment                                                                      | ×                    | ×                                      | ×     | ×      | ×      | ×                                             | ×      |

27. Demographics include birth date, gender and ethnicity.

28. Epidemiological information includes recent travel history and exposure to epidemic area or infected patients; medical history includes present illness and past medical history including co-morbidity medications
29. Physical examination includes height, weight, general outlook, head, eye, ear, nose, throat, neck and thyroid, skin, cardiovascular system, Anterior chest and lung, abdomen, neuro system, skeletal muscle system and lymphatic system
30. Vital signs: body temperature, respiratory rate, pulse, blood pressure; record maximum temperature of the visiting day and use same measurement criteria throughout the study period.
31. CBC with differential includes: haptoglobin and absolute count of red blood cell, platelet, total white blood cell, neutrophil, lymphocyte, monocyte, eosinophil and basophil
32. Urinalysis: urinary pH, urinary red blood cell, urinary white blood cell, urinary protein, glucose and ketone
33. Blood chemistry includes alanine aminotransferase, aspartate aminotransferase, total bilirubin, albumin,  $\gamma$ -glutamyl transpeptidase, lactate dehydrogenase, creatine kinase, creatine kinase isoenzyme-MB, blood urea nitrogen and creatinine
34. Coagulation panel includes: Prothrombin time, activated partial thrombin time, thrombin time, fibrinogen and international normalized ratio.
35. RT-PCR results upon unplanned visit should also be recorded in CRF
36. Record daily administration of tested drug including under use and over use
37. These examinations can be exempted by the investigators if the participants can provide qualified examination results within 3-day prior to initiation of the study
38. RT-PCR results of 2019-nCoV within 5-day prior to initiation of the study can be used for screening
39. For patients discharge alive, only medications and AE information will be collected *via* telephone contact.

**Table 2-2 Time and Events Schedule (severe subgroup)**

| Evaluation / Procedure                             | Screen/ Treatment | Treatment and follow-up (Day 2-14) |       |        |        |        | Extended follow-up <sup>[13]</sup> |
|----------------------------------------------------|-------------------|------------------------------------|-------|--------|--------|--------|------------------------------------|
|                                                    |                   | V2                                 | V3    | V4     | V5     | V6     |                                    |
| Visit                                              | V1                | V2                                 | V3    | V4     | V5     | V6     | V7                                 |
| Day +/- Window                                     | D-3~1             | D4±1d                              | D7±1d | D10±1d | D14±1d | D21±2d | D28±2d                             |
| Informed Consent                                   | ×                 |                                    |       |        |        |        |                                    |
| I/E Criteria                                       | ×                 |                                    |       |        |        |        |                                    |
| Randomization                                      | ×                 |                                    |       |        |        |        |                                    |
| Demographics <sup>[1]</sup>                        | ×                 |                                    |       |        |        |        |                                    |
| Epidemiological and medical history <sup>[2]</sup> | ×                 |                                    |       |        |        |        |                                    |
| Physical examination <sup>[3]</sup>                | ×                 |                                    |       |        |        | ×      | ×                                  |
| Vital signs <sup>[4]</sup>                         | ×                 | ×                                  | ×     | ×      | ×      | ×      | ×                                  |
| 12-lead                                            | × <sup>[11]</sup> |                                    |       |        |        | ×      | ×                                  |



|                                                                                                                                                                                                                                                                                                                                                                                                                                                                                                                                                                                                                                                                                                                                                                                                                                                             |                   |                                           |   |   |   |   |                                           |
|-------------------------------------------------------------------------------------------------------------------------------------------------------------------------------------------------------------------------------------------------------------------------------------------------------------------------------------------------------------------------------------------------------------------------------------------------------------------------------------------------------------------------------------------------------------------------------------------------------------------------------------------------------------------------------------------------------------------------------------------------------------------------------------------------------------------------------------------------------------|-------------------|-------------------------------------------|---|---|---|---|-------------------------------------------|
| electrocardiogram                                                                                                                                                                                                                                                                                                                                                                                                                                                                                                                                                                                                                                                                                                                                                                                                                                           |                   |                                           |   |   |   |   |                                           |
| CRP, ESR                                                                                                                                                                                                                                                                                                                                                                                                                                                                                                                                                                                                                                                                                                                                                                                                                                                    | x <sup>[11]</sup> | x                                         | x | x | x | x | x                                         |
| TNF- $\alpha$ , IL-6                                                                                                                                                                                                                                                                                                                                                                                                                                                                                                                                                                                                                                                                                                                                                                                                                                        | x <sup>[11]</sup> | x                                         | x | x | x | x | x                                         |
| CBC with differential <sup>[5]</sup>                                                                                                                                                                                                                                                                                                                                                                                                                                                                                                                                                                                                                                                                                                                                                                                                                        | x <sup>[11]</sup> | x                                         | x | x | x | x | x                                         |
| Urinalysis <sup>[6]</sup>                                                                                                                                                                                                                                                                                                                                                                                                                                                                                                                                                                                                                                                                                                                                                                                                                                   | x <sup>[11]</sup> |                                           |   |   |   | x | x                                         |
| Blood chemistry <sup>[7]</sup><br>(hepatic and kidney panel, Myocardial enzyme)                                                                                                                                                                                                                                                                                                                                                                                                                                                                                                                                                                                                                                                                                                                                                                             | x <sup>[11]</sup> | x                                         | x | x | x | x | x                                         |
| Coagulation panel <sup>[8]</sup>                                                                                                                                                                                                                                                                                                                                                                                                                                                                                                                                                                                                                                                                                                                                                                                                                            | x <sup>[11]</sup> | x                                         | x | x | x | x | x                                         |
| 2019-nCoV RT-PCR <sup>[9]</sup>                                                                                                                                                                                                                                                                                                                                                                                                                                                                                                                                                                                                                                                                                                                                                                                                                             | x <sup>[12]</sup> | x                                         | x | x | x | x | x                                         |
| Pulse oximetry (on room air)                                                                                                                                                                                                                                                                                                                                                                                                                                                                                                                                                                                                                                                                                                                                                                                                                                | x                 | x                                         | x | x | x | x | x                                         |
| Arterial blood gas analysis                                                                                                                                                                                                                                                                                                                                                                                                                                                                                                                                                                                                                                                                                                                                                                                                                                 | x <sup>[11]</sup> | Optional ( <i>as per clinical needs</i> ) |   |   |   |   |                                           |
| Pregnancy Test (Serum or Urine hCG)                                                                                                                                                                                                                                                                                                                                                                                                                                                                                                                                                                                                                                                                                                                                                                                                                         | x <sup>[11]</sup> |                                           |   |   |   | x |                                           |
| Chest CT                                                                                                                                                                                                                                                                                                                                                                                                                                                                                                                                                                                                                                                                                                                                                                                                                                                    | x <sup>[11]</sup> |                                           |   |   |   | x | Optional ( <i>as per clinical needs</i> ) |
| Respiratory symptom (Y/N)                                                                                                                                                                                                                                                                                                                                                                                                                                                                                                                                                                                                                                                                                                                                                                                                                                   | x                 | x                                         | x | x | x | x | x                                         |
| Study drug administration <sup>[10]</sup>                                                                                                                                                                                                                                                                                                                                                                                                                                                                                                                                                                                                                                                                                                                                                                                                                   | x                 | x                                         | x | x | x | x |                                           |
| Clinical status                                                                                                                                                                                                                                                                                                                                                                                                                                                                                                                                                                                                                                                                                                                                                                                                                                             | x                 |                                           | x |   | x | x | x                                         |
| IMV/NIV, ECMO or supplemental oxygen (Y/N)                                                                                                                                                                                                                                                                                                                                                                                                                                                                                                                                                                                                                                                                                                                                                                                                                  | x                 | x                                         | x | x | x | x | x                                         |
| Record of SMT                                                                                                                                                                                                                                                                                                                                                                                                                                                                                                                                                                                                                                                                                                                                                                                                                                               | x                 | x                                         | x | x | x | x | x                                         |
| AE Assessment                                                                                                                                                                                                                                                                                                                                                                                                                                                                                                                                                                                                                                                                                                                                                                                                                                               | x                 | x                                         | x | x | x | x | x                                         |
| <p>13. Demographics include birth date, gender and ethnicity.</p> <p>14. Epidemiological information includes recent travel history and exposure to epidemic area or infected patients; medical history includes present illness and past medical history including co-morbidity medications</p> <p>15. Physical examination includes height, weight, general outlook, head, eye, ear, nose, throat, neck and thyroid, skin, cardiovascular system, Anterior chest and lung, abdomen, neuro system, skeletal muscle system and lymphatic system</p> <p>16. Vital signs: body temperature, respiratory rate, pulse, blood pressure; record maximum temperature of the visiting day and use same measurement criteria throughout the study period.</p> <p>17. CBC with differential includes: haptoglobin and absolute count of red blood cell, platelet,</p> |                   |                                           |   |   |   |   |                                           |

total white blood cell, neutrophil, lymphocyte, monocyte, eosinophil and basophil

18. Urinalysis: urinary pH, urinary red blood cell, urinary white blood cell, urinary protein, glucose and ketone
19. Blood chemistry includes alanine aminotransferase, aspartate aminotransferase, total bilirubin, albumin,  $\gamma$ -glutamyl transpeptidase, lactate dehydrogenase, creatine kinase, creatine kinase isoenzyme-MB, blood urea nitrogen and creatinine
20. Coagulation panel includes: Prothrombin time, activated partial thrombin time, thrombin time, fibrinogen and international normalized ratio.
21. RT-PCR results upon unplanned visit should also be recorded in CRF
22. Record daily administration of tested drug including under use and over use
23. These examinations can be exempted by the investigators if the participants can provide qualified examination results within 3-day prior to initiation of the study
24. RT-PCR results of 2019-nCoV within 5-day prior to initiation of the study can be used for screening

For patients discharge alive, only medications and AE information will be collected *via* telephone contact.

---

### 3 Endpoints

#### 3.1 Primary Endpoints

(1) Negative conversion rate of virus nucleic acid within 28-day

(2) For severe disease subgroup, considering both virology conversion and clinical improvement.

- Definition for clinical improvement: decline of two categories from enrollment status on a six-category ordinal scale of clinical status which ranging from 1 (discharged) to 6 (death).

**Table 3-1 Six-category ordinal scale**

| Scale | Description                                                        |
|-------|--------------------------------------------------------------------|
| 6     | Death                                                              |
| 5     | ICU, requiring ECMO and/or IMV                                     |
| 4     | ICU/hospitalization, requiring NIV/ HFNC therapy                   |
| 3     | Hospitalization, requiring supplemental oxygen (but not NIV/ HFNC) |
| 2     | Hospitalization, not requiring supplemental oxygen;                |
| 1     | Discharge                                                          |

Abbreviation: IMV, invasive mechanical ventilation; NIV, non-invasive mechanical ventilation; HFNC, High-flow nasal cannula.

#### 3.2 Secondary endpoint

17) Negative conversion rate of virus nucleic acid at day 4, 7, 10, 14 or 21

18) Improvement rate of clinical symptoms within 28-day

- Definition for clinical symptoms improvement: resolving from fever (axillary temperature  $\leq 36.6^{\circ}\text{C}$ , or oral temperature  $\leq 37.2^{\circ}\text{C}$ , or rectal/ear temperature  $\leq 37.8^{\circ}\text{C}$ ), normalization of SpO<sub>2</sub> (SpO<sub>2</sub> > 94% on room air), disappearance of respiratory symptom

19) Improvement rate of laboratory parameters within 28-day

- Definition for laboratory parameters improvement: 50% decline of C-reactive protein, erythrocyte sedimentation rate, IL-6 and TNF- $\alpha$  level from baseline and normalization of absolute blood lymphocyte count.

20) Improvement rate of chest radiology within 28-day

- Definition for radiology improvement: Resolved more than 50% from baseline on chest CT

---

images

21) All-cause mortality

22) Clinical status at Day 7, 14, 21, 28 in patients with severe 2019-nCoV respiratory infection

23) For severe disease subgroup: Duration (days) of mechanical ventilation, extracorporeal membrane oxygenation, supplemental oxygenation and hospital stay

24) For mild/moderate subgroup: Progression rate within 28-day

- Definition for progression: progress to severe or critically severe.
- Definition for severe and critically severe 2019-nCoV pneumonia [3]:

G. Severe—Patients with 2019-nCoV pneumonia and at least one of the following:

10. Respiratory distress,  $RR \geq 30$  breaths per minute

11.  $SpO_2 \leq 93\%$  on room air

12. Partial arterial oxygen pressure ( $PaO_2$ ) / Fraction of inspired oxygen ( $FiO_2$ )  $\leq 300$  mmHg (1 mmHg=0.133 kPa).

H. Critically severe—Patients with severe 2019-nCoV pneumonia and at least one of the following:

10. Presence of lung failure requiring mechanical ventilation

11. Presence of shock;

12. Complicated with other organ failures requiring ICU monitoring

### 3.3 Safety endpoints

Adverse Events, Laboratory values, ECG, vital signs and physical examination findings will be monitored and recorded.

## 4 Sample Size Justification

Approximately 360 subjects (180 per group) will be randomized in the study. The sample size for this study is based on the alternative hypothesis of a 30% reduction in the risk of virus nucleic acid negativity. Under the exponential distribution, this benefit translates to a reduction in median virology negativity from 10 days to 7 days. A total of 248 events would provide a power of 80% to detect a reduction of 30% (hazard ratio (control vs. treatment) of 0.70) with a log-rank test, assuming

---

a two-sided significance level of 5%. A 75-day accrual period and an additional 7-day follow-up are assumed. The sample size calculation has also taken into consideration an annual dropout rate of 20%.

Meanwhile, co-primary endpoint in the subgroup defined by severe disease is 28-day clinical improvement. Assume 50% patients have clinical improvement by day 28 in control group, 100 patients can detect a 25% improvement in treatment group with a power=70%.

## **5 Analysis Set**

Intent-to-treat (ITT): is defined as subjects who have been randomly assigned to the treatment group or placebo group. Analyses of efficacy will be based on this population. The ITT analyses grouping will be based on treatment planned.

Per Protocol Set (PPS): Is a subset of ITT, defined as all subjects who have been randomly assigned to the study and received at least 11-day treatment(mild/moderate disease) /16-day treatment(severe disease), and have no major PD which significantly impact primary endpoint. The analyses grouping will be according to treatment planned.

Safety Set (SS) : is defined as subjects who have received at least 1 administration of any study treatment (partial or complete). This population will be used for all safety analyses. The safety analyses grouping will be according to treatment actually received. All patients in control arm will be included in SS and randomization date is used as substitute for treatment date.

## **6 Statistical Analysis Plan**

### **6.1 General Analysis Method**

All analyses will be conducted in SAS 9.2(or higher version). In general, continuous variables will be summarized using descriptive statistics such as mean, standard deviation (SD), median and range. Categorical variables will be summarized using frequency and percentage. For time-to-event variables, the Kaplan-Meier method will be used for descriptive summaries.

In listing, list results that tests/evaluation actually happened. Unless otherwise specified, listing follows the order: treatment, patient ID, visit, parameters.

Study month=number of days/30.4375。

Unless otherwise specified, display of mean and median will have one more digit than original data, standard deviation have 1 more digit than mean. All numerical display do not show more than

---

3 digits. Percentage has 1 digit and no percentage display if frequency is 0. In general, denominator in percentage is number of patients in the corresponding header.

Primary efficacy analysis is on ITT and supportive efficacy analysis is on PPS. Safety analysis is SS.

## 6.2 Imputation of Missing Data

(1) If a lab value was recorded as < normal value, ≤normal value, > normal value or ≥normal value, the value will be treated as =normal value in the summary tables, but listed as-is in the listings.

(2) Missing/Partial Date of Birth

If year and month and date are missing, then BOB is missing. If year is not missing, use June01 to impute month and date. If year and month are not missing, use date 15 to impute date.

(3) Partial Concomitant Medication Start/End Date

- Partial Concomitant Medication Start Date

- If the year, month and date are completely missing, no imputation will be performed, the medication was treated as concomitant medication.
- If the date only is missing, use the date 1 to impute.
- If the date and month are missing, use January 01 to impute month and date.

- Partial Concomitant Medication End Date

- If the year, month and date are completely missing, no imputation will be performed, the medication was treated as concomitant medication.
- If the date only is missing, use the last date of the same month to impute.
- If the date and month are missing, use Dec 31 to impute month and date.
- If the end date after imputation is after the last visit date, then use the last visit date as the end date.

(4) Missing/Partial Adverse Event:

- Missing/Partial Adverse Event Onset Date

- 1) When month and year are present and the day is missing,
  - If the onset month and year are the same as the month and year of first study treatment, the day of first study treatment or the day-component of the AE end date (possibly

- 
- imputed) is imputed, whichever is earlier
- If the onset month and year are not the same as the month and year of first study treatment, then the first day of the month is imputed
- 2) When only a year is present or no components of the onset date are present,
- If the onset year is the same as the year of first study treatment. If AE end date is available and is prior to first study treatment, the day and month of AE end date are imputed. Otherwise, the day and month of first study treatment are imputed
  - If the onset year is different from the year of first study treatment, the 1st of January is imputed
- 3) If the onset date is completely missing, the date of first study treatment is imputed as the onset date.
- **Missing/Partial Adverse Event End Date**

If the end date of an adverse event is missing completely or partially, the following imputation rules will be used.

    - If month and year are present and the day of the month is missing, the last day of the month is imputed.
    - If only a year is present, the 31st of December is used.
    - If the imputed date is later than the date of death (if available), the date of death will be used as the imputed date instead.
- (4) If the relevance of an AE with the study drug is missing or not evaluable, the AE will be counted in “relevant”.

### **6.3 The definition of Baseline**

Unless otherwise specified, baseline values is defined as values at visit “V1”. The change from baseline is defined as the values-baseline value.

### **6.4 Disposition**

#### **6.4.1 Disposition Information**

An overview of subject disposition by treatment group will be provided. The overview includes a summary of total number of subjects who are randomized to each treatment group, the number and percentage of subjects who are randomized but not treated and number and percentage of subjects

---

who are treated. The number and percentage of subjects who discontinued study treatment including reason for discontinuation as indicated by the investigators will be summarized. The similar summaries will be presented for all randomized subjects who discontinued from study participation.

A listing of subjects who discontinued study treatment including reasons for discontinuation will be provided. A similar listing will be provided for subjects who discontinued study participation.

## **6.5 Protocol Deviations**

Major protocol deviations will be summarized for the ITT population by the following types of deviation for each treatment group:

Entered but did not satisfy inclusion/exclusion criteria

Developed withdrawal criteria but not withdrawn

Received wrong treatment or incorrect dose

Received an excluded concomitant treatment

Efficacy assessment deviation

Other – protocol non-compliance

A list of subjects with major protocol deviations including subject ID, type of deviation, and reasons for deviation will be provided.

## **6.6 SUBJECT INFORMATION**

### **6.6.1 Demographics and Baseline Characteristics**

Unless specified otherwise, all demographic and baseline characteristics variables will be summarized for the ITT population. No statistical comparisons between the 2 treatment groups are planned.

### **6.6.2 Disease Characteristics**

Parameters relevant to the study disease will be summarized in ITT by treatment group, including time from the first positive test to the randomization, time from the first onset of symptoms to the randomization, exposure history, SpO<sub>2</sub>, onset of fever, onset of respiratory symptom, medication allergy history, etc.

### **6.6.3 Medical History**

Pre-existing conditions and medical history will be coded by MedDra (version 22.0 or higher)



---

and summarized by SOC and PT.

A listing of subjects who had pre-existing conditions and medical history will be provided.

#### **6.6.4 Historical/Concomitant Medications**

Historical medications and concomitant medications will be coded based on WHO DD(the latest version).

Historical medication is defined as those medication the ending date of which is before randomization date.

Concomitant medication is defined as those medication the ending date of which is after randomization date or missing.

Historical/Concomitant Medication collected in the CRF page during the study will be summarized by therapeutic class, pharmacologic class, and drug name for each treatment group.

#### **6.6.5 Historical/Concomitant Treatment(non-Medications)**

Similar analytic approach as for historical/concomitant treatment(medications).

### **7 Efficacy**

Efficacy analysis will be done on both ITT and PPS. Results on ITT is primary.

#### **7.1.1 Primary Efficacy Analysis**

The frequency and proportion of virology negativity by day 4、7、10、14、21 will be reported for each group. Proportion is defined by cumulative # of patients who had negativity by the given day/number of ITT in each group. Conversion of virology negativity is defined as two consecutive testing results showing negativity (at least one day interval between two tests) and no result is positive before end of study(or early drop-out). If a planned test is done but result is pending, impute result as “positive”. Unscheduled testing can be used to confirm negativity.

The Kaplan-Meier method will be used to estimate the distribution of time to negativity for each treatment group. The median time to negativity with 95% CI will be provided. In addition, the number and percentage of subjects who had an event or were censored will be reported. The Kaplan-Meier curve will also be plotted by treatment group and will be compared by the stratified log-rank test. The stratification factor is the same as factor considered in the randomization.

The primary treatment comparison of the distribution of overall negativity will be based on a stratified log-rank test. The p-value from a stratified log-rank test will be reported. Hazard ratio and its 95% confidence interval will be estimated based on a stratified Cox's regression model with treatment as the sole explanatory variable. Stratification factors used in the analyses include severity of disease.

In addition, 4, 7, 10, 14, 21 and 28 day of negativity rate with 95% CI will be estimated by Kaplan-Meier method and reported for each treatment group. Determination of dates of event and dates for censoring is summarized in Table 1.

**Sensitivity analysis:** In order to evaluate the impact of missing testing results, if a planned testing is done but result is pending, impute result as “negativity”.

In the listing, list each testing results, date, testing location, results, etc.

**Subgroup Analysis:** In the severe disease subgroup, the rate of clinical improvement by 28-day will be summarized and compared by chis-square test (or Exact test, if frequency is low). As supporting analysis, KM method may be applied to estimate the rate of clinical improvement by day 28.

Table 7-1 Rule for dates of event and dates for censoring

| # | Situation                                                                                   | Date of negativity or censoring        | Outcome  |
|---|---------------------------------------------------------------------------------------------|----------------------------------------|----------|
| 1 | Two consecutive negative results and no subsequent positive results before the end of study | The first date test result is negative | Event    |
| 2 | Two consecutive negative results followed by subsequent positive results                    | The date result is positive            | Censored |
| 3 | One negative result only before the end of study                                            | The last date test is done             | Censored |
| 4 | No tests after baseline                                                                     | Randomization date                     | Censored |

---

### 7.1.2 Secondary Efficacy Analysis

Report the rates and relative risk and their 95% confidence interval by the day of 4,7,10,14,21 for secondary endpoints (Negative conversion rate of virus nucleic acid, Improvement rate of clinical symptoms, Improvement rate of laboratory parameters, Improvement rate of chest radiology, All-cause mortality, Clinical status change, progression, etc). Descriptive statistics (mean, standard deviation, median, range) will be used to summarize duration (days) of mechanical ventilation, extracorporeal membrane oxygenation, supplemental oxygenation and hospital stay. If applicable, KM method will be used to analyze time-to-events type endpoints. Median and 95% CI may be reported. KM curves will be compared by log-rank test.

#### **Subgroup Analysis:**

- In the severe disease subgroup, report the clinical state change at each time point. Summarize duration (days) of mechanical ventilation, extracorporeal membrane oxygenation, supplemental oxygenation and hospital stay.
- In the mild/moderate subgroup, report progression rate at each time point.。

## 8 Safety

Safety analysis will be conducted among SS set.

### 8.1.1 Drug Exposure

Compliance is defined as the actual dose/planned dose\*100%.

Summarize compliance the treatment duration. The treatment duration for study drug is defined by the last day of drug use-the first day of drug use and the treatment duration for control group is defined by the last day in study-randomization date.

### 8.1.2 Adverse Event

The general rule when AE is analyzed:

- Adverse events will be coded using the latest version of Medical Dictionary for Regulatory Activities (MedDRA) coding dictionary and will be recorded in standard medical terminology and graded according to the National Cancer Institute Common Terminology Criteria for Adverse Events (NCI-CTCAE)

- 
- AE will be summarized by actual treatment received.
  - If a patient had the same AE for multiple times, in the table summarizing prevalence at patient-level, the highest grade of AE will be summarized. In the table summarizing prevalence at incidence-level, The same AE on the same patient on the same date, the highest grade will be summarized.
  - Summary of AE events does not come alone with percentage.
  - When summarizing a subgroup of AE which prevalence is greater than a given percentage, search the AE within SOC/PT.

The incidence and prevalence of AEs will be summarized overall, by treatment group, by MedDRA system organ class (SOC) and preferred term, by toxicity grade, and by relationship to study treatment administration. Specifically, the following AE summaries will be presented by treatment group:

- Overview of AEs
- TEAEs
- TEAE sCTCAE Grade  $\geq 3$
- TEAEs Leading to discontinuation of study drug
- TEAEs leading to death
- TEAEs related to study drug
- TEAEs related to study drug and CTCAE grade  $\geq 3$
- SAEs
- TEAEs related to study drug
- ADRs

TEAEs are defined as any AE that occurs after randomization through 30 days after the last study treatment; or the day prior to start of subsequent therapy, whichever is earlier; or any AE that is considered drug-related (very likely, probably, or possibly related) regardless of the start date of the event; or any AE that is present at baseline but worsens in toxicity grade or is subsequently considered drug-related by the investigator.

ADRs are defined as any TEAE that is considered drug-related (very likely, probably, or possibly related, or non-evaluable).

List all AEs, including SOC/PT, start/end date, CTCAE grade, relationship to drug, SAE, ADR,

---

outcome

### 8.1.3 Clinical Laboratory Tests

Descriptive statistics (mean, standard deviation, median, range) will be used to summarize observed laboratory values (Hematology panel, Blood chemistry panel, coagulation test, urinalysis) and change from baseline in observed value at each scheduled visit for each treatment group. Shift table for baseline value (normal vs abnormal but not clinical meaningful vs. abnormal and clinical meaningful) and post-baseline value will be provided.

### 8.1.4 Electrocardiogram (ECG)

ECG will be summarized by visit and by treatment group. Shift table for baseline value (normal vs abnormal but not clinical meaningful vs. abnormal and clinical meaningful) and post-baseline value may be provided.

### 8.1.5 Vital Signs

Vital signs (systolic and diastolic blood pressure, heart rate, and temperature) values and change from baseline will be summarized by visit and by treatment group. Shift table for baseline value (normal vs abnormal but not clinical meaningful vs. abnormal and clinical meaningful) and post-baseline value may be provided.

### 8.1.6 Physical Examination Findings

Physical examination findings will be summarized by visit and by treatment group. Shift table for baseline value (normal vs abnormal but not clinical meaningful vs. abnormal and clinical meaningful) and the worst post-baseline value may be provided.

## 9 Interim Analysis

An Independent Data Monitoring Committee (IDMC) will be established to review data at 1 interim analyses prior to the primary endpoint analysis.

The following cumulative  $\alpha$ -spending function (O'Brien-Fleming type by Lan-DeMets algorithm) (Lan-Demets, 1983) will be applied to control family-wise type-I error (0.05)

$$\alpha(t_k) = 2 \left( 1 - \Phi \left( \frac{\Phi^{-1} \left( 1 - \frac{\alpha}{2} \right)}{\sqrt{t_k}} \right) \right)$$

---

where,  $t_k$  is the cumulative information at the time of kth analysis,  $\Phi$  is standard normal distribution,  $\Phi^{-1}$  quantile function. The cumulative alpha spending function  $\alpha(t_k)$  is a function of cumulative information, therefore, the significance level (p-value boundary) is a function of cumulative information, i.e., the observed number of events.

The first interim analysis will occur after 40% of subjects (around 150 subjects) have been treated for at least 7 days or have discontinued. The goal is to evaluate efficacy and need of sample size re-estimation. P-value boundary for efficacy significance is 0.00079(two-sided).

Final analysis will be conducted after 248 events are observed. P-value boundary is 0.04974(two-sided).

The actual alpha spent and p-value boundaries at each analysis will be calculated based on the exact number of events.

## **10 TFL shells**

TFL shells will be provided in a separate file.

## **11 References**

1. K. K. GORDON LAN, DAVID L. DEMETS, **Discrete sequential boundaries for clinical trials**, *Biometrika*, Volume 70, Issue 3, December 1983, Pages 659–663

## **Final Case Report Form: KY2020-29**

Version date. 25 February 2020

This is the translated version of the final Case Report Form  
originally written in Chinese.





## Guide to Fill out the Form

1. The case report form shall be recorded by an authorized person, and each page in the CRF shall be carefully checked and signed.
2. The trial physicians should be familiar with the trial protocol and master the GCP principles.
3. Please write clearly and legibly with a sign pen in blue or black ink, preferably in capital letters for English, for example: CASE REPORT FORM
4. When filling in Numbers in open squares, fill in one number in each box; If the number of digits is less than the corresponding number of squares, please fill with zero. Spaces are not allowed. For example: 56Kg, fill in the blanks as follows: | 0 | 5 | 6 |. | 0 | 0 |Kg.
5. The date is in the international ISO8601 date format: yyyyymmdd. For example, December 21, 2007 was written as | 2 | 0 | 0 | 7 |YEAR| 1 | 2 |Month| 2 | 1 |DAY。
6. For the items with “□”in the form, please type “x”in the corresponding box, , or fill in the relevant Numbers. If not done or the data is not available, please fill in ND(Not Done) or NK(not known) in the corresponding space; NA is not applicable.
7. Each item must be filled in accurately, do not arbitrarily alter, do not use correction fluid or other ways to cover the original data. If you find any errors, please cross out the wrong record with a single line so that the original record is still legible, then fill in the correct record at the top right, indicating the name, abbreviation and date of modification. For example: 58.6 <sup>56.8 ZH 2007-12-21</sup>.
- ~~8.~~ The four of the Chinese phoneticize abbreviation of the patient's name should be filled in. Fill in the first two letters of each word for the two-character name; fill in the first letter of three words and the second letter of the third word or the three-character name; and fill in the first letter of each word for the four-character name. The Chinese phoneticize abbreviation of each patient's name should be unified in their CRF. For example: Zhang Hong| Z | H | H | 0 |, Li Shuming| L | S | M | I |, Ou Yang Xiaohui| O | Y | X | H |.
9. Do not change the format of the case report form. If you find that there is no place in the form to fill in the information the recorder wishes to record, please contact the responsible CRA.
10. Upon completion of the case report form, the principal investigator shall examine each page of the case report form and sign at the investigator's statement.

|                            |                                                  |
|----------------------------|--------------------------------------------------|
| Protocol Number: KY2020-29 | <b>Screening/Treatment</b>                       |
| Center Number [ ] [ ]      | Subject Screening Number [ ] [ ] [ ] [ ] [ ] [ ] |
| Visit 1 (D-3~1)            |                                                  |

**Date of Current Visit:** [ ] [ ] [ ] [ ] |Year| [ ] [ ] |MONTH| [ ] [ ] |DAY

| <b>Sign the Informed Consent</b>                                                                                |                                                                                                                                                                                                                                                                                                              |
|-----------------------------------------------------------------------------------------------------------------|--------------------------------------------------------------------------------------------------------------------------------------------------------------------------------------------------------------------------------------------------------------------------------------------------------------|
| Whether to sign informed consent                                                                                | <input type="checkbox"/> NO <input type="checkbox"/> YES                                                                                                                                                                                                                                                     |
| Date of signing the Informed Consent                                                                            | [ ] [ ] [ ] [ ]  YEAR  [ ] [ ]  MONTH  [ ] [ ]  DAY                                                                                                                                                                                                                                                          |
| Version number of Informed Consent                                                                              | _____                                                                                                                                                                                                                                                                                                        |
| The version number of the protocol shall apply when the informed consent is signed                              | [ ] [ ] [ ] [ ]                                                                                                                                                                                                                                                                                              |
| <b>Confirm Inclusion/Exclusion Criteria</b>                                                                     |                                                                                                                                                                                                                                                                                                              |
| Do subjects meet all inclusion criteria and not all exclusion criteria?                                         | <input type="checkbox"/> YES <input type="checkbox"/> NO                                                                                                                                                                                                                                                     |
| <input type="checkbox"/> Does not meet the selection criteria, the selection criteria number (multiple choices) | <input type="checkbox"/> 1 <input type="checkbox"/> 2 <input type="checkbox"/> 3 <input type="checkbox"/> 4 <input type="checkbox"/> 5 <input type="checkbox"/> 6 <input type="checkbox"/> 7<br><input type="checkbox"/> Other, Please describe: _____                                                       |
| <input type="checkbox"/> Meet the exclusion criteria, exclusion criteria number (multiple choices)              | <input type="checkbox"/> 1 <input type="checkbox"/> 2 <input type="checkbox"/> 3 <input type="checkbox"/> 4 <input type="checkbox"/> 5 <input type="checkbox"/> 6 <input type="checkbox"/> 7 <input type="checkbox"/> 8 <input type="checkbox"/> 9<br><input type="checkbox"/> Other, Please describe: _____ |

| <b>Demographic Data</b> |                                                                                                           |
|-------------------------|-----------------------------------------------------------------------------------------------------------|
| Gender                  | <input type="checkbox"/> male <input type="checkbox"/> female                                             |
| Date of Birth           | [ ] [ ] [ ] [ ]  YEAR  [ ] [ ]  MONTH  [ ] [ ]  DAY If not available, please state age: [ ] [ ] years old |
| Nationality             | <input type="checkbox"/> Han <input type="checkbox"/> Other, Please describe: _____                       |

| <b>History of 2019-nCoV Respiratory Infection</b>                   |                                                                                                                                                                                                                           |
|---------------------------------------------------------------------|---------------------------------------------------------------------------------------------------------------------------------------------------------------------------------------------------------------------------|
| Date of first onset                                                 | [ ] [ ] [ ] [ ]  YEAR  [ ] [ ]  MONTH  [ ] [ ]  DAY                                                                                                                                                                       |
| History of exposure to related causes within 14 days prior to onset | <input type="checkbox"/> NO <input type="checkbox"/> YES <input type="checkbox"/> Unknown                                                                                                                                 |
| Contact type (multiple choice)                                      | <input type="checkbox"/> Contact with Hubei region<br><input type="checkbox"/> Contact with person infected with 2019-nCoV<br><input type="checkbox"/> Unknown<br><input type="checkbox"/> Other, please describe : _____ |

|                            |                            |
|----------------------------|----------------------------|
| Protocol Number: KY2020-29 | <b>Screening/Treatment</b> |
| Center Number [ ] [ ] [ ]  | Visit 1 (D-3~1)            |

|                                                                                                                                                               |                                                                                                                                             |
|---------------------------------------------------------------------------------------------------------------------------------------------------------------|---------------------------------------------------------------------------------------------------------------------------------------------|
| Previous anti-2019-nCoV treatment or not                                                                                                                      | <input type="checkbox"/> _0 NO <input type="checkbox"/> _1 YES                                                                              |
| Date of first positive nucleic acid test                                                                                                                      | [ ] [ ] [ ] [ ]   YEAR   [ ] [ ]   MONTH   [ ] [ ]   DAY                                                                                    |
| Clinical type at enrollment                                                                                                                                   | <input type="checkbox"/> _1 Mild <input type="checkbox"/> _2 Common <input type="checkbox"/> _3 severe <input type="checkbox"/> _4 critical |
| Note: If the subject ever had a treatment for 2019-nCoV pneumonia, please fill in the form "past/combined drug therapy" and "past/combined non-drug therapy". |                                                                                                                                             |

|                                                                                         |  |
|-----------------------------------------------------------------------------------------|--|
| <b>History of Drug Allergy</b>                                                          |  |
| Does the subject have a history of drug allergy?                                        |  |
| <input type="checkbox"/> _0 NO <input type="checkbox"/> _1 YES, Please describe : _____ |  |

| <b>Past/Concomitant Disease History</b>                                                        |         |                                                              |                                                                   |                                                              |                                                                   |
|------------------------------------------------------------------------------------------------|---------|--------------------------------------------------------------|-------------------------------------------------------------------|--------------------------------------------------------------|-------------------------------------------------------------------|
| Does the subject have any past/concomitant disease other than 2019-nCoV pneumonia?             |         |                                                              |                                                                   |                                                              |                                                                   |
| <input type="checkbox"/> _0 NO <input type="checkbox"/> _1 YES, Please fill in the form below. |         |                                                              |                                                                   |                                                              |                                                                   |
| Number                                                                                         | Disease | Confirmed Date                                               | Disease persists or not?                                          | End Date                                                     | Receive treatment or not?                                         |
| 1                                                                                              |         | [ ] [ ] [ ] [ ]   YEAR<br>[ ] [ ]   MONTH  <br>[ ] [ ]   DAY | <input type="checkbox"/> _0 NO<br><input type="checkbox"/> _1 YES | [ ] [ ] [ ] [ ]   YEAR<br>[ ] [ ]   MONTH  <br>[ ] [ ]   DAY | <input type="checkbox"/> _0 NO<br><input type="checkbox"/> _1 YES |
| 2                                                                                              |         | [ ] [ ] [ ] [ ]   YEAR<br>[ ] [ ]   MONTH  <br>[ ] [ ]   DAY | <input type="checkbox"/> _0 NO<br><input type="checkbox"/> _1 YES | [ ] [ ] [ ] [ ]   YEAR<br>[ ] [ ]   MONTH  <br>[ ] [ ]   DAY | <input type="checkbox"/> _0 NO<br><input type="checkbox"/> _1 YES |
| 3                                                                                              |         | [ ] [ ] [ ] [ ]   YEAR<br>[ ] [ ]   MONTH  <br>[ ] [ ]   DAY | <input type="checkbox"/> _0 NO<br><input type="checkbox"/> _1 YES | [ ] [ ] [ ] [ ]   YEAR<br>[ ] [ ]   MONTH  <br>[ ] [ ]   DAY | <input type="checkbox"/> _0 NO<br><input type="checkbox"/> _1 YES |
| 4                                                                                              |         | [ ] [ ] [ ] [ ]   YEAR<br>[ ] [ ]   MONTH  <br>[ ] [ ]   DAY | <input type="checkbox"/> _0 NO<br><input type="checkbox"/> _1 YES | [ ] [ ] [ ] [ ]   YEAR<br>[ ] [ ]   MONTH  <br>[ ] [ ]   DAY | <input type="checkbox"/> _0 NO<br><input type="checkbox"/> _1 YES |
| 5                                                                                              |         | [ ] [ ] [ ] [ ]   YEAR<br>[ ] [ ]   MONTH  <br>[ ] [ ]   DAY | <input type="checkbox"/> _0 NO<br><input type="checkbox"/> _1 YES | [ ] [ ] [ ] [ ]   YEAR<br>[ ] [ ]   MONTH  <br>[ ] [ ]   DAY | <input type="checkbox"/> _0 NO<br><input type="checkbox"/> _1 YES |
| 6                                                                                              |         | [ ] [ ] [ ] [ ]   YEAR<br>[ ] [ ]   MONTH  <br>[ ] [ ]   DAY | <input type="checkbox"/> _0 NO<br><input type="checkbox"/> _1 YES | [ ] [ ] [ ] [ ]   YEAR<br>[ ] [ ]   MONTH  <br>[ ] [ ]   DAY | <input type="checkbox"/> _0 NO<br><input type="checkbox"/> _1 YES |
| 7                                                                                              |         | [ ] [ ] [ ] [ ]   YEAR<br>[ ] [ ]   MONTH  <br>[ ] [ ]   DAY | <input type="checkbox"/> _0 NO<br><input type="checkbox"/> _1 YES | [ ] [ ] [ ] [ ]   YEAR<br>[ ] [ ]   MONTH  <br>[ ] [ ]   DAY | <input type="checkbox"/> _0 NO<br><input type="checkbox"/> _1 YES |

|                            |                                 |
|----------------------------|---------------------------------|
| Protocol Number: KY2020-29 | <b>Screening/Treatment</b>      |
| Center Number  __          | Subject Screening Number  _____ |
| Visit 1 (D-3~1)            |                                 |

|    |  |                                    |                                                             |                                    |                                                             |
|----|--|------------------------------------|-------------------------------------------------------------|------------------------------------|-------------------------------------------------------------|
| 8  |  | _____ YEAR<br> __ MONTH <br>__ DAY | <input type="checkbox"/> NO<br><input type="checkbox"/> YES | _____ YEAR<br> __ MONTH <br>__ DAY | <input type="checkbox"/> NO<br><input type="checkbox"/> YES |
| 9  |  | _____ YEAR<br> __ MONTH <br>__ DAY | <input type="checkbox"/> NO<br><input type="checkbox"/> YES | _____ YEAR<br> __ MONTH <br>__ DAY | <input type="checkbox"/> NO<br><input type="checkbox"/> YES |
| 10 |  | _____ YEAR<br> __ MONTH <br>__ DAY | <input type="checkbox"/> NO<br><input type="checkbox"/> YES | _____ YEAR<br> __ MONTH <br>__ DAY | <input type="checkbox"/> NO<br><input type="checkbox"/> YES |

|                                                                       |                                                   |                    |                                                                                                                                                                                                                               |
|-----------------------------------------------------------------------|---------------------------------------------------|--------------------|-------------------------------------------------------------------------------------------------------------------------------------------------------------------------------------------------------------------------------|
| <b>Vital Signs</b> <input type="checkbox"/> Unexamined, reason: _____ |                                                   |                    |                                                                                                                                                                                                                               |
| Date                                                                  | _____ YEAR __ MONTH __ DAY                        |                    |                                                                                                                                                                                                                               |
| Daily maximum temperature                                             | __ . __ °C                                        | Measurement method | <input type="checkbox"/> 1 Axilla <input type="checkbox"/> 2 Oral <input type="checkbox"/> 3 Anus<br><input type="checkbox"/> 4 Ear <input type="checkbox"/> 5 Unknown <input type="checkbox"/> 6 Other, please describe_____ |
| Respiratory                                                           | __ times/min                                      | Pulse              | __ times/min                                                                                                                                                                                                                  |
| Blood pressure                                                        | __ / __  mmHg (Systolic/diastolic blood pressure) |                    |                                                                                                                                                                                                                               |

|                                                                                |                                                                                                               |                            |                            |                            |                              |
|--------------------------------------------------------------------------------|---------------------------------------------------------------------------------------------------------------|----------------------------|----------------------------|----------------------------|------------------------------|
| <b>physical examination</b> <input type="checkbox"/> Unexamined, reason: _____ |                                                                                                               |                            |                            |                            |                              |
| Date                                                                           | _____ YEAR __ MONTH __ DAY                                                                                    |                            |                            |                            |                              |
| Inspection Part                                                                | Result                                                                                                        |                            |                            |                            | If abnormal, please describe |
|                                                                                | 1= Normal<br>2= Abnormal, no clinical significance<br>3= Abnormal, with clinical significance<br>0=Unexamined |                            |                            |                            |                              |
| General appearance                                                             | <input type="checkbox"/> 1                                                                                    | <input type="checkbox"/> 2 | <input type="checkbox"/> 3 | <input type="checkbox"/> 0 |                              |
| Head                                                                           | <input type="checkbox"/> 1                                                                                    | <input type="checkbox"/> 2 | <input type="checkbox"/> 3 | <input type="checkbox"/> 0 |                              |
| Eyes                                                                           | <input type="checkbox"/> 1                                                                                    | <input type="checkbox"/> 2 | <input type="checkbox"/> 3 | <input type="checkbox"/> 0 |                              |
| Nose                                                                           | <input type="checkbox"/> 1                                                                                    | <input type="checkbox"/> 2 | <input type="checkbox"/> 3 | <input type="checkbox"/> 0 |                              |
| Larynx                                                                         | <input type="checkbox"/> 1                                                                                    | <input type="checkbox"/> 2 | <input type="checkbox"/> 3 | <input type="checkbox"/> 0 |                              |



|                            |                              |
|----------------------------|------------------------------|
| Protocol Number: KY2020-29 | <b>Screening/Treatment</b>   |
| Center Number  __          | Subject Screening Number  __ |
| Visit 1 (D-3~1)            |                              |

Date: |\_\_| |YEAR|\_\_| |MONTH|\_\_| |DAY Normal range Number: |\_\_|

| Item                                   | Result                            |                                         | Result Interpretation      |                            |                            | Unexamined                 |
|----------------------------------------|-----------------------------------|-----------------------------------------|----------------------------|----------------------------|----------------------------|----------------------------|
|                                        | measured value                    | Unit                                    | Normal                     | Abnormal                   |                            |                            |
|                                        |                                   |                                         |                            | No clinical significance   | Significant clinically     |                            |
| Glutamic-pyruvic transaminase (ALT)    | <input type="checkbox"/> 1 U/L    | <input type="checkbox"/> 2 Other: _____ | <input type="checkbox"/> 1 | <input type="checkbox"/> 2 | <input type="checkbox"/> 3 | <input type="checkbox"/> 0 |
| Glutamic-oxalacetic transaminase (AST) | <input type="checkbox"/> 1 U/L    | <input type="checkbox"/> 2 Other: _____ | <input type="checkbox"/> 1 | <input type="checkbox"/> 2 | <input type="checkbox"/> 3 | <input type="checkbox"/> 0 |
| Total bilirubin (TBIL)                 | <input type="checkbox"/> 1 μmol/L | <input type="checkbox"/> 2 Other: _____ | <input type="checkbox"/> 1 | <input type="checkbox"/> 2 | <input type="checkbox"/> 3 | <input type="checkbox"/> 0 |
| Albumin (ALB)                          | <input type="checkbox"/> 1 g/L    | <input type="checkbox"/> 2 Other: _____ | <input type="checkbox"/> 1 | <input type="checkbox"/> 2 | <input type="checkbox"/> 3 | <input type="checkbox"/> 0 |
| γ- glutamyl transpeptidase (GGT)       | <input type="checkbox"/> 1 U/L    | <input type="checkbox"/> 2 Other: _____ | <input type="checkbox"/> 1 | <input type="checkbox"/> 2 | <input type="checkbox"/> 3 | <input type="checkbox"/> 0 |
| Lactic dehydrogenase (LDH)             | <input type="checkbox"/> 1 U/L    | <input type="checkbox"/> 2 Other: _____ | <input type="checkbox"/> 1 | <input type="checkbox"/> 2 | <input type="checkbox"/> 3 | <input type="checkbox"/> 0 |
| Creatine kinase (CK)                   | <input type="checkbox"/> 1 U/L    | <input type="checkbox"/> 2 Other: _____ | <input type="checkbox"/> 1 | <input type="checkbox"/> 2 | <input type="checkbox"/> 3 | <input type="checkbox"/> 0 |
| Creatine kinase isoenzyme (CK-MB)      | <input type="checkbox"/> 1 U/L    | <input type="checkbox"/> 2 Other: _____ | <input type="checkbox"/> 1 | <input type="checkbox"/> 2 | <input type="checkbox"/> 3 | <input type="checkbox"/> 0 |
| Blood urea nitrogen (BUN)              | <input type="checkbox"/> 1 mmol/L | <input type="checkbox"/> 2 Other: _____ | <input type="checkbox"/> 1 | <input type="checkbox"/> 2 | <input type="checkbox"/> 3 | <input type="checkbox"/> 0 |
| Urea (Urea)                            | <input type="checkbox"/> 1 mmol/L | <input type="checkbox"/> 2 Other: _____ | <input type="checkbox"/> 1 | <input type="checkbox"/> 2 | <input type="checkbox"/> 3 | <input type="checkbox"/> 0 |
| Serum creatinine (CR)                  | <input type="checkbox"/> 1 μmol/L | <input type="checkbox"/> 2 Other: _____ | <input type="checkbox"/> 1 | <input type="checkbox"/> 2 | <input type="checkbox"/> 3 | <input type="checkbox"/> 0 |

**Urine Test** 0 Unexamined, reason \_\_\_\_\_

Date: |\_\_| |YEAR|\_\_| |MONTH|\_\_| |DAY Normal range Number: |\_\_|

| Item              | Result                                    |                                         | Result Interpretation      |                            |                            | Unexamined                 |
|-------------------|-------------------------------------------|-----------------------------------------|----------------------------|----------------------------|----------------------------|----------------------------|
|                   | measured value                            | Unit                                    | Normal                     | Abnormal                   |                            |                            |
|                   |                                           |                                         |                            | No clinical significance   | Significant clinically     |                            |
| Urine Protein     | <input type="checkbox"/> 1 Not Applicable | <input type="checkbox"/> 2 Other: _____ | <input type="checkbox"/> 1 | <input type="checkbox"/> 2 | <input type="checkbox"/> 3 | <input type="checkbox"/> 0 |
| Urine Glucose     | <input type="checkbox"/> 1 mmol/L         | <input type="checkbox"/> 2 Other: _____ | <input type="checkbox"/> 1 | <input type="checkbox"/> 2 | <input type="checkbox"/> 3 | <input type="checkbox"/> 0 |
| Urine PH value    | <input type="checkbox"/> 1 Not Applicable | <input type="checkbox"/> 2 Other: _____ | <input type="checkbox"/> 1 | <input type="checkbox"/> 2 | <input type="checkbox"/> 3 | <input type="checkbox"/> 0 |
| Urine Erythrocyte | <input type="checkbox"/> 1 Not Applicable | <input type="checkbox"/> 2 Other: _____ | <input type="checkbox"/> 1 | <input type="checkbox"/> 2 | <input type="checkbox"/> 3 | <input type="checkbox"/> 0 |
| Urine Leukocyte   | <input type="checkbox"/> 1 Not Applicable | <input type="checkbox"/> 2 Other: _____ | <input type="checkbox"/> 1 | <input type="checkbox"/> 2 | <input type="checkbox"/> 3 | <input type="checkbox"/> 0 |
| Urine Ketone      | <input type="checkbox"/> 1 Not Applicable | <input type="checkbox"/> 2 Other: _____ | <input type="checkbox"/> 1 | <input type="checkbox"/> 2 | <input type="checkbox"/> 3 | <input type="checkbox"/> 0 |

|                                    |                                                               |
|------------------------------------|---------------------------------------------------------------|
| Protocol Number: KY2020-29         | <b>Screening/Treatment</b>                                    |
| Center Number <input type="text"/> | Subject Screening Number <input type="text"/> Visit 1 (D-3~1) |

| Coagulation Function <input type="checkbox"/> Unexamined, reason _____                   |                                           |                                    |                                           |                            |                            |                            |
|------------------------------------------------------------------------------------------|-------------------------------------------|------------------------------------|-------------------------------------------|----------------------------|----------------------------|----------------------------|
| Date: <input type="text"/>  YEAR  <input type="text"/>  MONTH  <input type="text"/>  DAY |                                           |                                    | Normal range Number: <input type="text"/> |                            |                            |                            |
| Item                                                                                     | Result                                    |                                    | Result Interpretation                     |                            |                            | Unexamin ed Unit           |
|                                                                                          | measured value                            | Unit                               | Normal                                    | Abnormal                   |                            |                            |
|                                                                                          |                                           |                                    |                                           | No clinical significance   | Significant clinically     |                            |
| ProthrombinTime (PT)                                                                     | <input type="checkbox"/> 1 S              | <input type="checkbox"/> 2 Other : | <input type="checkbox"/> 1                | <input type="checkbox"/> 2 | <input type="checkbox"/> 3 | <input type="checkbox"/> 0 |
| Activated Partial Thromboplastin Time (APTT)                                             | <input type="checkbox"/> 1 S              | <input type="checkbox"/> 2 Other : | <input type="checkbox"/> 1                | <input type="checkbox"/> 2 | <input type="checkbox"/> 3 | <input type="checkbox"/> 0 |
| Thrombin Time (TT)                                                                       | <input type="checkbox"/> 1 S              | <input type="checkbox"/> 2 Other : | <input type="checkbox"/> 1                | <input type="checkbox"/> 2 | <input type="checkbox"/> 3 | <input type="checkbox"/> 0 |
| Fibrinogen (Fbg)                                                                         | <input type="checkbox"/> 1 g/L            | <input type="checkbox"/> 2 Other : | <input type="checkbox"/> 1                | <input type="checkbox"/> 2 | <input type="checkbox"/> 3 | <input type="checkbox"/> 0 |
| International Normalized Ratio (INR)                                                     | <input type="checkbox"/> 1 Not Applicable | <input type="checkbox"/> 2 Other : | <input type="checkbox"/> 1                | <input type="checkbox"/> 2 | <input type="checkbox"/> 3 | <input type="checkbox"/> 0 |

| C-Reaction Protein (CRP) <input type="checkbox"/> Unexamined, reason _____               |                                 |                                      |                                           |                            |                            |
|------------------------------------------------------------------------------------------|---------------------------------|--------------------------------------|-------------------------------------------|----------------------------|----------------------------|
| Date: <input type="text"/>  YEAR  <input type="text"/>  MONTH  <input type="text"/>  DAY |                                 |                                      | Normal range Number: <input type="text"/> |                            |                            |
| Item                                                                                     | Result                          |                                      | Result Interpretation                     |                            |                            |
|                                                                                          | Measured Value                  | Unit                                 | Normal                                    | Abnormal                   |                            |
|                                                                                          |                                 |                                      |                                           | No clinical significance   | Significant clinically     |
| C-Reactive Protine (CRP)                                                                 | <input type="checkbox"/> 1 mg/L | <input type="checkbox"/> 2 Other: __ | <input type="checkbox"/> 1                | <input type="checkbox"/> 2 | <input type="checkbox"/> 3 |

| Erythrocyte Sedimentation Rate (ESR) <input type="checkbox"/> Unexamined, reason _____   |                                 |                                   |                                           |                            |                            |
|------------------------------------------------------------------------------------------|---------------------------------|-----------------------------------|-------------------------------------------|----------------------------|----------------------------|
| Date: <input type="text"/>  YEAR  <input type="text"/>  MONTH  <input type="text"/>  DAY |                                 |                                   | Normal range Number: <input type="text"/> |                            |                            |
| Item                                                                                     | Result                          |                                   | Result Interpretation                     |                            |                            |
|                                                                                          | Measured Value                  | Unit                              | Normal                                    | Abnormal                   |                            |
|                                                                                          |                                 |                                   |                                           | No clinical significance   | Significant clinically     |
| Erythrocyte Sedimentation Rate (ESR)                                                     | <input type="checkbox"/> 1 mm/h | <input type="checkbox"/> 2 Other: | <input type="checkbox"/> 1                | <input type="checkbox"/> 2 | <input type="checkbox"/> 3 |

| TNF-α <input type="checkbox"/> Unexamined, reason _____                                  |                                  |                                   |                                           |                            |                            |
|------------------------------------------------------------------------------------------|----------------------------------|-----------------------------------|-------------------------------------------|----------------------------|----------------------------|
| Date: <input type="text"/>  YEAR  <input type="text"/>  MONTH  <input type="text"/>  DAY |                                  |                                   | Normal range Number: <input type="text"/> |                            |                            |
| Item                                                                                     | Result                           |                                   | Result Interpretation                     |                            |                            |
|                                                                                          | Measured Value                   | Unit                              | Normal                                    | U                          |                            |
|                                                                                          |                                  |                                   |                                           | No clinical significance   | Significant clinically     |
| TNF-α                                                                                    | <input type="checkbox"/> 1 pg/mL | <input type="checkbox"/> 2 Other: | <input type="checkbox"/> 1                | <input type="checkbox"/> 2 | <input type="checkbox"/> 3 |

|                            |                                                  |
|----------------------------|--------------------------------------------------|
| Protocol Number: KY2020-29 | <b>Screening/Treatment</b>                       |
| Center Number [ ] [ ] [ ]  | Subject Screening Number [ ] [ ] [ ] [ ] [ ] [ ] |
| Visit 1 (D-3~1)            |                                                  |

|                                                                                                   |                       |                                |                                 |                              |                                 |                               |
|---------------------------------------------------------------------------------------------------|-----------------------|--------------------------------|---------------------------------|------------------------------|---------------------------------|-------------------------------|
| <b>IL-6</b> <input type="checkbox"/> Unexamined, reason _____                                     |                       |                                |                                 |                              |                                 |                               |
| Date: [ ] [ ] [ ] [ ]  YEAR  [ ] [ ]  MONTH  [ ] [ ]  DAY    Normal range Number: [ ] [ ] [ ] [ ] |                       |                                |                                 |                              |                                 |                               |
| <b>Item</b>                                                                                       | <b>Result</b>         |                                |                                 | <b>Result Interpretation</b> |                                 |                               |
| IL-6                                                                                              | <b>Measured Value</b> | <b>Unit</b>                    |                                 | <b>Normal</b>                | <b>Abnormal</b>                 |                               |
|                                                                                                   |                       | <input type="checkbox"/> pg/mL | <input type="checkbox"/> Other: |                              | <input type="checkbox"/> 1      | <input type="checkbox"/> 2    |
|                                                                                                   |                       |                                |                                 |                              | <b>No clinical significance</b> | <b>Significant clinically</b> |

|                                                                                    |  |
|------------------------------------------------------------------------------------|--|
| <b>Urine or serum HCG (Only applicable to women of childbearing age)</b>           |  |
| <input type="checkbox"/> Unexamined, reason _____                                  |  |
| <input type="checkbox"/> Not Applicable (Man or woman who isn't able to reproduce) |  |
| Date: [ ] [ ] [ ] [ ]  YEAR  [ ] [ ]  MONTH  [ ] [ ]  DAY                          |  |
| Sample: <input type="checkbox"/> Blood <input type="checkbox"/> Urine              |  |
| Result: <input type="checkbox"/> Negative <input type="checkbox"/> Positive        |  |

|                                                                                                                                                               |  |
|---------------------------------------------------------------------------------------------------------------------------------------------------------------|--|
| <b>Routine 12 Leads Electrocardiogram</b> <input type="checkbox"/> Unexamined, reason _____                                                                   |  |
| Date: [ ] [ ] [ ] [ ]  YEAR  [ ] [ ]  MONTH  [ ] [ ]  DAY                                                                                                     |  |
| Result: <input type="checkbox"/> Normal <input type="checkbox"/> Abnormal, No clinical significance <input type="checkbox"/> Abnormal, Significant clinically |  |
| If "Abnormal", please describe: _____                                                                                                                         |  |

|                                                                   |  |
|-------------------------------------------------------------------|--|
| <b>Chest CT</b> <input type="checkbox"/> Unexamined, reason _____ |  |
| Date: [ ] [ ] [ ] [ ]  YEAR  [ ] [ ]  MONTH  [ ] [ ]  DAY         |  |
| Result: _____                                                     |  |

|                                                                                                                                    |                                                                                                                                                                                                                                      |
|------------------------------------------------------------------------------------------------------------------------------------|--------------------------------------------------------------------------------------------------------------------------------------------------------------------------------------------------------------------------------------|
| <b>Nucleic Acid Test of 2019-nCov</b> <input type="checkbox"/> Unexamined, reason _____                                            |                                                                                                                                                                                                                                      |
| Sampling Part (multiple choice): <input type="checkbox"/> Upper respiratory tract <input type="checkbox"/> Lower respiratory tract |                                                                                                                                                                                                                                      |
| Upper respiratory tract                                                                                                            | Date: [ ] [ ] [ ] [ ]  YEAR  [ ] [ ]  MONTH  [ ] [ ]  DAY<br>Result: <input type="checkbox"/> Negative <input type="checkbox"/> Positive <input type="checkbox"/> Unidentified <input type="checkbox"/> Other, please describe _____ |
| Lower respiratory tract                                                                                                            | Date: [ ] [ ] [ ] [ ]  YEAR  [ ] [ ]  MONTH  [ ] [ ]  DAY<br>Result: <input type="checkbox"/> Negative <input type="checkbox"/> Positive <input type="checkbox"/> Unidentified <input type="checkbox"/> Other, please describe _____ |



|                            |                                                  |
|----------------------------|--------------------------------------------------|
| Protocol Number: KY2020-29 | <b>Screening/Treatment</b>                       |
| Center Number [ ] [ ]      | Subject Screening Number [ ] [ ] [ ] [ ] [ ] [ ] |
| Visit 1 (D-3~1)            |                                                  |

|        |                                                                                                                                                                                                                      |
|--------|----------------------------------------------------------------------------------------------------------------------------------------------------------------------------------------------------------------------|
| Result | <input type="checkbox"/> <sub>1</sub> Negative <input type="checkbox"/> <sub>2</sub> Positive <input type="checkbox"/> <sub>3</sub> Unidentified <input type="checkbox"/> <sub>4</sub> Other , please describe _____ |
|--------|----------------------------------------------------------------------------------------------------------------------------------------------------------------------------------------------------------------------|

|                                                                                                                           |
|---------------------------------------------------------------------------------------------------------------------------|
| <b>Pulse oxygen saturation (without oxygen inhalation )</b> <input type="checkbox"/> <sub>0</sub> Unexamined, reason_____ |
| Date: [ ] [ ] [ ] [ ]  YEAR  [ ] [ ]  MONTH  [ ] [ ]  DAY                                                                 |
| Measured Value: _____% (Rest state)                                                                                       |

|                                                                                                                                                                                              |
|----------------------------------------------------------------------------------------------------------------------------------------------------------------------------------------------|
| <b>Screening Result</b> <input type="checkbox"/> <sub>0</sub> Not Evaluation                                                                                                                 |
| Is the subject screened successfully?<br><input type="checkbox"/> <sub>0</sub> NO, the main cause of failure screening: _____<br><input type="checkbox"/> <sub>1</sub> YES, please randomize |
| Randomize Date: [ ] [ ] [ ] [ ]  YEAR  [ ] [ ]  MONTH  [ ] [ ]  DAY                                                                                                                          |
| Randomize Number:                                                                                                                                                                            |
| Randomized Group <input type="checkbox"/> <sub>1</sub> Experimental group <input type="checkbox"/> <sub>2</sub> Control group                                                                |

If any adverse events have occurred since the signing of the informed consent, please fill in the form of "adverse events"; If there is medication combination, please fill in the form "previous/combined medication"; If there is combined non-drug therapy, please fill in the "previous/combined non-drug therapy" form; If there is an out-of-plan inspection, please fill in the "out-of-plan inspection" form; If there is IMV/NIV, ECMO, HFNC, oxygen therapy, please fill in the "IMV/NIV, ECMO, HFNC, oxygen therapy" form.

|                            |                  |
|----------------------------|------------------|
| Protocol number: KY2020-29 | <b>Treatment</b> |
| Center Number [ ] [ ] [ ]  | Visit 2 (D4±1d)  |

**Date of Current Visit:** [ ] [ ] [ ] [ ] |YEAR| [ ] [ ] |MONTH| [ ] [ ] |DAY

|                                                                      |                                                                            |                    |                                                                                                                                                                                                                                                                                                  |
|----------------------------------------------------------------------|----------------------------------------------------------------------------|--------------------|--------------------------------------------------------------------------------------------------------------------------------------------------------------------------------------------------------------------------------------------------------------------------------------------------|
| <b>Vital Signs</b> <input type="checkbox"/> Unexamined, reason _____ |                                                                            |                    |                                                                                                                                                                                                                                                                                                  |
| Date                                                                 | [ ] [ ] [ ] [ ]  YEAR  [ ] [ ]  MONTH  [ ] [ ]  DAY                        |                    |                                                                                                                                                                                                                                                                                                  |
| Daily maximum temperature                                            | [ ] [ ] [ ] [ ] °C                                                         | Measurement method | <input type="checkbox"/> <sub>1</sub> Axilla <input type="checkbox"/> <sub>2</sub> Oral <input type="checkbox"/> <sub>3</sub> Anus<br><input type="checkbox"/> <sub>4</sub> Ear <input type="checkbox"/> <sub>5</sub> Unknown <input type="checkbox"/> <sub>6</sub> Other, please describe _____ |
| Respiratory                                                          | [ ] [ ] [ ] times/min                                                      | Pulse              | [ ] [ ] [ ] [ ] times/min                                                                                                                                                                                                                                                                        |
| Blood pressure                                                       | [ ] [ ] [ ] [ ] / [ ] [ ] [ ] [ ] mmHg (Systolic/diastolic blood pressure) |                    |                                                                                                                                                                                                                                                                                                  |

|                                                                                                                                                                                                    |                                                     |
|----------------------------------------------------------------------------------------------------------------------------------------------------------------------------------------------------|-----------------------------------------------------|
| <b>Respiratory symptoms</b> <input type="checkbox"/> Unexamined, reason _____                                                                                                                      |                                                     |
| Date:                                                                                                                                                                                              | [ ] [ ] [ ] [ ]  YEAR  [ ] [ ]  MONTH  [ ] [ ]  DAY |
| Whether the subject has respiratory symptoms or not: <input type="checkbox"/> <sub>0</sub> NO <input type="checkbox"/> <sub>1</sub> NO, please describe: _____                                     |                                                     |
| Result: <input type="checkbox"/> <sub>1</sub> Normal <input type="checkbox"/> <sub>2</sub> Abnormal No clinical significance <input type="checkbox"/> <sub>3</sub> Abnormal Significant clinically |                                                     |

| <b>Blood Count</b> <input type="checkbox"/> Unexamined, reason _____ |                                                     |                                                                                                              |                                         |                                       |                                       |                                       |
|----------------------------------------------------------------------|-----------------------------------------------------|--------------------------------------------------------------------------------------------------------------|-----------------------------------------|---------------------------------------|---------------------------------------|---------------------------------------|
| Date:                                                                | [ ] [ ] [ ] [ ]  YEAR  [ ] [ ]  MONTH  [ ] [ ]  DAY | Normal range Number:                                                                                         | [ ] [ ] [ ] [ ] [ ] [ ] [ ] [ ] [ ] [ ] |                                       |                                       |                                       |
| Item                                                                 | Measured Value                                      | Result                                                                                                       |                                         | Result Interpretation                 |                                       | Unexamined                            |
|                                                                      |                                                     | Unit                                                                                                         | Normal                                  | No clinical significance              | Significant clinically                |                                       |
| Red Blood Cell (RBC)                                                 |                                                     | <input type="checkbox"/> <sub>1</sub> 10 <sup>12</sup> /L <input type="checkbox"/> <sub>2</sub> Other: _____ | <input type="checkbox"/> <sub>1</sub>   | <input type="checkbox"/> <sub>2</sub> | <input type="checkbox"/> <sub>3</sub> | <input type="checkbox"/> <sub>0</sub> |
| White Blood Cell                                                     |                                                     | <input type="checkbox"/> <sub>1</sub> 10 <sup>9</sup> /L <input type="checkbox"/> <sub>2</sub> Other: _____  | <input type="checkbox"/> <sub>1</sub>   | <input type="checkbox"/> <sub>2</sub> | <input type="checkbox"/> <sub>3</sub> | <input type="checkbox"/> <sub>0</sub> |
| Hemoglobin (Hb)                                                      |                                                     | <input type="checkbox"/> <sub>1</sub> g/L <input type="checkbox"/> <sub>2</sub> Other: _____                 | <input type="checkbox"/> <sub>1</sub>   | <input type="checkbox"/> <sub>2</sub> | <input type="checkbox"/> <sub>3</sub> | <input type="checkbox"/> <sub>0</sub> |
| Platelet (PLT)                                                       |                                                     | <input type="checkbox"/> <sub>1</sub> 10 <sup>9</sup> /L <input type="checkbox"/> <sub>2</sub> Other: _____  | <input type="checkbox"/> <sub>1</sub>   | <input type="checkbox"/> <sub>2</sub> | <input type="checkbox"/> <sub>3</sub> | <input type="checkbox"/> <sub>0</sub> |
| Neutrophil (ANC)                                                     |                                                     | <input type="checkbox"/> <sub>1</sub> 10 <sup>9</sup> /L <input type="checkbox"/> <sub>2</sub> Other: _____  | <input type="checkbox"/> <sub>1</sub>   | <input type="checkbox"/> <sub>2</sub> | <input type="checkbox"/> <sub>3</sub> | <input type="checkbox"/> <sub>0</sub> |
| Lymphocyte (LY)                                                      |                                                     | <input type="checkbox"/> <sub>1</sub> 10 <sup>9</sup> /L <input type="checkbox"/> <sub>2</sub> Other: _____  | <input type="checkbox"/> <sub>1</sub>   | <input type="checkbox"/> <sub>2</sub> | <input type="checkbox"/> <sub>3</sub> | <input type="checkbox"/> <sub>0</sub> |
| Monocyte (MO)                                                        |                                                     | <input type="checkbox"/> <sub>1</sub> 10 <sup>9</sup> /L <input type="checkbox"/> <sub>2</sub> Other: _____  | <input type="checkbox"/> <sub>1</sub>   | <input type="checkbox"/> <sub>2</sub> | <input type="checkbox"/> <sub>3</sub> | <input type="checkbox"/> <sub>0</sub> |
| Eosinophil (EO)                                                      |                                                     | <input type="checkbox"/> <sub>1</sub> 10 <sup>9</sup> /L <input type="checkbox"/> <sub>2</sub> Other: _____  | <input type="checkbox"/> <sub>1</sub>   | <input type="checkbox"/> <sub>2</sub> | <input type="checkbox"/> <sub>3</sub> | <input type="checkbox"/> <sub>0</sub> |
| Basophil (BA)                                                        |                                                     | <input type="checkbox"/> <sub>1</sub> 10 <sup>9</sup> /L <input type="checkbox"/> <sub>2</sub> Other: _____  | <input type="checkbox"/> <sub>1</sub>   | <input type="checkbox"/> <sub>2</sub> | <input type="checkbox"/> <sub>3</sub> | <input type="checkbox"/> <sub>0</sub> |

**Blood Biochemistry**       Unexamined, reason \_\_\_\_\_

|                            |                  |
|----------------------------|------------------|
| Protocol number: KY2020-29 | <b>Treatment</b> |
| Center Number  __          | Visit 2 (D4±1d)  |

Date|\_\_|\_\_|\_\_|YEAR|\_\_|\_\_|MONTH|\_\_|\_\_|DAY Normal range Number: |\_\_|\_\_|\_\_|

| Item                                   | Result         |                                                                          | Result Interpretation      |                            |                            | Unexamined                 |
|----------------------------------------|----------------|--------------------------------------------------------------------------|----------------------------|----------------------------|----------------------------|----------------------------|
|                                        | Measured Value | Unit                                                                     | Normal                     | Abnormal                   |                            |                            |
|                                        |                |                                                                          |                            | No clinical significance   | Significant clinically     |                            |
| Glutamic-pyruvic transaminase (ALT)    |                | <input type="checkbox"/> 1 U/L <input type="checkbox"/> 2Other: _____    | <input type="checkbox"/> 1 | <input type="checkbox"/> 2 | <input type="checkbox"/> 3 | <input type="checkbox"/> 0 |
| Glutamic-oxalacetic transaminase (AST) |                | <input type="checkbox"/> 1 U/L <input type="checkbox"/> 2Other: _____    | <input type="checkbox"/> 1 | <input type="checkbox"/> 2 | <input type="checkbox"/> 3 | <input type="checkbox"/> 0 |
| Total Bilirubin (TBIL)                 |                | <input type="checkbox"/> 1 µmol/L <input type="checkbox"/> 2Other: _____ | <input type="checkbox"/> 1 | <input type="checkbox"/> 2 | <input type="checkbox"/> 3 | <input type="checkbox"/> 0 |
| Albumin (ALB)                          |                | <input type="checkbox"/> 1 g/L <input type="checkbox"/> 2Other: _____    | <input type="checkbox"/> 1 | <input type="checkbox"/> 2 | <input type="checkbox"/> 3 | <input type="checkbox"/> 0 |
| γ- glutamyl transpeptidase (GGT)       |                | <input type="checkbox"/> 1 U/L <input type="checkbox"/> 2Other: _____    | <input type="checkbox"/> 1 | <input type="checkbox"/> 2 | <input type="checkbox"/> 3 | <input type="checkbox"/> 0 |
| Lactic dehydrogenase (LDH)             |                | <input type="checkbox"/> 1 U/L <input type="checkbox"/> 2Other: _____    | <input type="checkbox"/> 1 | <input type="checkbox"/> 2 | <input type="checkbox"/> 3 | <input type="checkbox"/> 0 |
| Creatine kinase (CK)                   |                | <input type="checkbox"/> 1 U/L <input type="checkbox"/> 2Other: _____    | <input type="checkbox"/> 1 | <input type="checkbox"/> 2 | <input type="checkbox"/> 3 | <input type="checkbox"/> 0 |
| Creatine kinase isoenzyme (CK-MB)      |                | <input type="checkbox"/> 1 U/L <input type="checkbox"/> 2Other: _____    | <input type="checkbox"/> 1 | <input type="checkbox"/> 2 | <input type="checkbox"/> 3 | <input type="checkbox"/> 0 |
| Blood urea nitrogen (BUN)              |                | <input type="checkbox"/> 1 mmol/L <input type="checkbox"/> 2Other: _____ | <input type="checkbox"/> 1 | <input type="checkbox"/> 2 | <input type="checkbox"/> 3 | <input type="checkbox"/> 0 |
| Urea (Urea)                            |                | <input type="checkbox"/> 1 mmol/L <input type="checkbox"/> 2Other: _____ | <input type="checkbox"/> 1 | <input type="checkbox"/> 2 | <input type="checkbox"/> 3 | <input type="checkbox"/> 0 |
| Serum creatinine (CR)                  |                | <input type="checkbox"/> 1 µmol/L <input type="checkbox"/> 2Other: _____ | <input type="checkbox"/> 1 | <input type="checkbox"/> 2 | <input type="checkbox"/> 3 | <input type="checkbox"/> 0 |

**Urine Test** 0Unexamined, reason \_\_\_\_\_  
1 Not Applicable

Date: |\_\_|\_\_|\_\_|YEAR|\_\_|\_\_|MONTH|\_\_|\_\_|DAY Normal range Number: |\_\_|\_\_|\_\_|

| Item              | Result         |                                                                                  | Result Interpretation      |                            |                            | Unexamined                 |
|-------------------|----------------|----------------------------------------------------------------------------------|----------------------------|----------------------------|----------------------------|----------------------------|
|                   | Measured Value | Unit                                                                             | Normal                     | Abnormal                   |                            |                            |
|                   |                |                                                                                  |                            | No clinical significance   | Significant clinically     |                            |
| Urine Protein     |                | <input type="checkbox"/> 1Not Applicable <input type="checkbox"/> 2Other: _____  | <input type="checkbox"/> 1 | <input type="checkbox"/> 2 | <input type="checkbox"/> 3 | <input type="checkbox"/> 0 |
| Urine Glucose     |                | <input type="checkbox"/> 1 mmol/L <input type="checkbox"/> 2Other: _____         | <input type="checkbox"/> 1 | <input type="checkbox"/> 2 | <input type="checkbox"/> 3 | <input type="checkbox"/> 0 |
| Urine PH value    |                | <input type="checkbox"/> 1 Not Applicable <input type="checkbox"/> 2Other: _____ | <input type="checkbox"/> 1 | <input type="checkbox"/> 2 | <input type="checkbox"/> 3 | <input type="checkbox"/> 0 |
| Urine Erythrocyte |                | <input type="checkbox"/> 1Not Applicable <input type="checkbox"/> 2Other: _____  | <input type="checkbox"/> 1 | <input type="checkbox"/> 2 | <input type="checkbox"/> 3 | <input type="checkbox"/> 0 |
| Urine Leukocyte   |                | <input type="checkbox"/> 1Not Applicable <input type="checkbox"/> 2Other: _____  | <input type="checkbox"/> 1 | <input type="checkbox"/> 2 | <input type="checkbox"/> 3 | <input type="checkbox"/> 0 |
| Urine Ketone      |                | <input type="checkbox"/> 1Not Applicable <input type="checkbox"/> 2Other: _____  | <input type="checkbox"/> 1 | <input type="checkbox"/> 2 | <input type="checkbox"/> 3 | <input type="checkbox"/> 0 |

|                            |                                                  |
|----------------------------|--------------------------------------------------|
| Protocol number: KY2020-29 | <b>Treatment</b>                                 |
| Center Number [ ] [ ]      | Subject Screening Number [ ] [ ] [ ] [ ] [ ] [ ] |
| Visit 2 (D4±1d)            |                                                  |

| <b>Coagulation Function</b> <input type="checkbox"/> Unexamined, reason _____                                    |                |                                                                                                         |                                       |                                       |                                       |                                       |
|------------------------------------------------------------------------------------------------------------------|----------------|---------------------------------------------------------------------------------------------------------|---------------------------------------|---------------------------------------|---------------------------------------|---------------------------------------|
| Date: [ ] [ ] [ ] [ ]   YEAR   [ ] [ ]   MONTH   [ ] [ ]   DAY      Normal range Number: [ ] [ ] [ ] [ ] [ ] [ ] |                |                                                                                                         |                                       |                                       |                                       |                                       |
| Item                                                                                                             | Result         |                                                                                                         | Result Interpretation                 |                                       |                                       | Unexamined                            |
|                                                                                                                  | Measured Value | Unit                                                                                                    | Normal                                | Abnormal                              |                                       |                                       |
| Prothrombin Time (PT)                                                                                            |                | <input type="checkbox"/> <sub>1</sub> S <input type="checkbox"/> <sub>2</sub> Other: _____              | <input type="checkbox"/> <sub>1</sub> | <input type="checkbox"/> <sub>2</sub> | <input type="checkbox"/> <sub>3</sub> | <input type="checkbox"/> <sub>0</sub> |
| Activated Partial Thromboplastin Time (APTT)                                                                     |                | <input type="checkbox"/> <sub>1</sub> S <input type="checkbox"/> <sub>2</sub> Other: _____              | <input type="checkbox"/> <sub>1</sub> | <input type="checkbox"/> <sub>2</sub> | <input type="checkbox"/> <sub>3</sub> | <input type="checkbox"/> <sub>0</sub> |
| Thrombin Time (TT)                                                                                               |                | <input type="checkbox"/> <sub>1</sub> S <input type="checkbox"/> <sub>2</sub> Other: _____              | <input type="checkbox"/> <sub>1</sub> | <input type="checkbox"/> <sub>2</sub> | <input type="checkbox"/> <sub>3</sub> | <input type="checkbox"/> <sub>0</sub> |
| Fibrinogen (Fbg)                                                                                                 |                | <input type="checkbox"/> <sub>1</sub> g/L <input type="checkbox"/> <sub>2</sub> Other: _____            | <input type="checkbox"/> <sub>1</sub> | <input type="checkbox"/> <sub>2</sub> | <input type="checkbox"/> <sub>3</sub> | <input type="checkbox"/> <sub>0</sub> |
| International Normalized Ratio (INR)                                                                             |                | <input type="checkbox"/> <sub>1</sub> Not Applicable <input type="checkbox"/> <sub>2</sub> Other: _____ | <input type="checkbox"/> <sub>1</sub> | <input type="checkbox"/> <sub>2</sub> | <input type="checkbox"/> <sub>3</sub> | <input type="checkbox"/> <sub>0</sub> |

| <b>C-REACTION PROTEIN (CRP)</b> <input type="checkbox"/> Unexamined, reason _____                                |                |                                                                                               |                                       |                                       |                                       |                                       |
|------------------------------------------------------------------------------------------------------------------|----------------|-----------------------------------------------------------------------------------------------|---------------------------------------|---------------------------------------|---------------------------------------|---------------------------------------|
| Date: [ ] [ ] [ ] [ ]   YEAR   [ ] [ ]   MONTH   [ ] [ ]   DAY      Normal range Number: [ ] [ ] [ ] [ ] [ ] [ ] |                |                                                                                               |                                       |                                       |                                       |                                       |
| Item                                                                                                             | Result         |                                                                                               | Result Interpretation                 |                                       |                                       | Unexamined                            |
|                                                                                                                  | Measured Value | Unit                                                                                          | Normal                                | Abnormal                              |                                       |                                       |
| C-REACTION PROTEIN (CRP)                                                                                         |                | <input type="checkbox"/> <sub>1</sub> mg/L <input type="checkbox"/> <sub>2</sub> Other: _____ | <input type="checkbox"/> <sub>1</sub> | <input type="checkbox"/> <sub>2</sub> | <input type="checkbox"/> <sub>3</sub> | <input type="checkbox"/> <sub>0</sub> |

| <b>Erythrocyte Sedimentation Rate (ESR)</b> <input type="checkbox"/> Unexamined, reason _____                    |                |                                                                                               |                                       |                                       |                                       |                                       |
|------------------------------------------------------------------------------------------------------------------|----------------|-----------------------------------------------------------------------------------------------|---------------------------------------|---------------------------------------|---------------------------------------|---------------------------------------|
| Date: [ ] [ ] [ ] [ ]   YEAR   [ ] [ ]   MONTH   [ ] [ ]   DAY      Normal range Number: [ ] [ ] [ ] [ ] [ ] [ ] |                |                                                                                               |                                       |                                       |                                       |                                       |
| Item                                                                                                             | Result         |                                                                                               | Result Interpretation                 |                                       |                                       | Unexamined                            |
|                                                                                                                  | Measured Value | Unit                                                                                          | Normal                                | Abnormal                              |                                       |                                       |
| Erythrocyte Sedimentation Rate (ESR)                                                                             |                | <input type="checkbox"/> <sub>1</sub> mm/h <input type="checkbox"/> <sub>2</sub> Other: _____ | <input type="checkbox"/> <sub>1</sub> | <input type="checkbox"/> <sub>2</sub> | <input type="checkbox"/> <sub>3</sub> | <input type="checkbox"/> <sub>0</sub> |

| <b>TNF-α</b> <input type="checkbox"/> Unexamined, reason _____                                                   |                |                                                                                                |                                       |                                       |                                       |                                       |
|------------------------------------------------------------------------------------------------------------------|----------------|------------------------------------------------------------------------------------------------|---------------------------------------|---------------------------------------|---------------------------------------|---------------------------------------|
| Date: [ ] [ ] [ ] [ ]   YEAR   [ ] [ ]   MONTH   [ ] [ ]   DAY      Normal range Number: [ ] [ ] [ ] [ ] [ ] [ ] |                |                                                                                                |                                       |                                       |                                       |                                       |
| Item                                                                                                             | Result         |                                                                                                | Result Interpretation                 |                                       |                                       | Unexamined                            |
|                                                                                                                  | Measured Value | Unit                                                                                           | Normal                                | Abnormal                              |                                       |                                       |
| TNF-α                                                                                                            |                | <input type="checkbox"/> <sub>1</sub> pg/mL <input type="checkbox"/> <sub>2</sub> Other: _____ | <input type="checkbox"/> <sub>1</sub> | <input type="checkbox"/> <sub>2</sub> | <input type="checkbox"/> <sub>3</sub> | <input type="checkbox"/> <sub>0</sub> |

|                            |                  |
|----------------------------|------------------|
| Protocol number: KY2020-29 | <b>Treatment</b> |
| Center Number [ ][ ]       | Visit 2 (D4±1d)  |

| <b>IL-6</b> <input type="checkbox"/> Unexamined, reason _____                          |                |                                  |                                   |                            |                            |                            |
|----------------------------------------------------------------------------------------|----------------|----------------------------------|-----------------------------------|----------------------------|----------------------------|----------------------------|
| Date: [ ][ ][ ][ ] YEAR [ ][ ] MONTH [ ][ ] DAY      Normal range Number: [ ][ ][ ][ ] |                |                                  |                                   |                            |                            |                            |
| Item                                                                                   | Result         |                                  |                                   | Result Interpretation      |                            |                            |
|                                                                                        | Measured Value | Unit                             |                                   | Normal                     | Abnormal                   |                            |
|                                                                                        |                | No clinical significance         | Significant clinically            |                            |                            |                            |
| IL-6                                                                                   |                | <input type="checkbox"/> 1 pg/mL | <input type="checkbox"/> 2 Other: | <input type="checkbox"/> 1 | <input type="checkbox"/> 2 | <input type="checkbox"/> 3 |

|                                                                                                                                                                                   |  |  |  |  |  |  |
|-----------------------------------------------------------------------------------------------------------------------------------------------------------------------------------|--|--|--|--|--|--|
| <b>Nucleic Acid Test of 2019-nCov</b> <input type="checkbox"/> Unexamined, reason _____                                                                                           |  |  |  |  |  |  |
| <input type="checkbox"/> 1 Not Applicable                                                                                                                                         |  |  |  |  |  |  |
| Sampling Part: <input type="checkbox"/> 1 Upper respiratory tract <input type="checkbox"/> 2 Lower respiratory tract                                                              |  |  |  |  |  |  |
| Date: [ ][ ][ ][ ] YEAR [ ][ ] MONTH [ ][ ] DAY      Date: [ ][ ]:[ ][ ]                                                                                                          |  |  |  |  |  |  |
| Result : <input type="checkbox"/> 1 Negative <input type="checkbox"/> 2 Positive <input type="checkbox"/> 3 Unidentified <input type="checkbox"/> 4 Other , please describe _____ |  |  |  |  |  |  |

|                                                                                                               |  |  |  |  |  |  |
|---------------------------------------------------------------------------------------------------------------|--|--|--|--|--|--|
| <b>Pulse oxygen saturation (without oxygen inhalation )</b> <input type="checkbox"/> Unexamined, reason _____ |  |  |  |  |  |  |
| Date: [ ][ ][ ][ ] YEAR [ ][ ] MONTH [ ][ ] DAY                                                               |  |  |  |  |  |  |
| Measured Value: _____ % (Rest state)                                                                          |  |  |  |  |  |  |

|                                                                                                          |  |  |  |  |  |  |
|----------------------------------------------------------------------------------------------------------|--|--|--|--|--|--|
| <b>Whether develops into severe/critical type</b> <input type="checkbox"/> No evaluation                 |  |  |  |  |  |  |
| Date: [ ][ ][ ][ ] YEAR [ ][ ] MONTH [ ][ ] DAY                                                          |  |  |  |  |  |  |
| Whether develops into severe/critical type: <input type="checkbox"/> 0 NO <input type="checkbox"/> 1 YES |  |  |  |  |  |  |
| Date of developing into severe/critical type: [ ][ ][ ][ ] YEAR [ ][ ] MONTH [ ][ ] DAY                  |  |  |  |  |  |  |

**If any adverse events have occurred since the last visit, please fill in the “Adverse Events Form”. If there is medication combination, please fill in the “Previous/Combined medication Form”; If there is combined non-drug therapy, please fill in the “Comined Non-Drug Therapy Form”; If there is an out-of-plan inspection, please fill in the “Out-Of-Plan Inspection Form”.**

|                                    |                  |
|------------------------------------|------------------|
| Protocol Number: KY2020-29         | <b>Treatment</b> |
| Center Number <input type="text"/> | Visit 3 (D7±1d)  |

**Date of Current Visit:** |||YEAR|||MONTH|||DAY

|                                                                      |                                                                                                                                                                                     |                    |                                                                                                                                                                                                                                |
|----------------------------------------------------------------------|-------------------------------------------------------------------------------------------------------------------------------------------------------------------------------------|--------------------|--------------------------------------------------------------------------------------------------------------------------------------------------------------------------------------------------------------------------------|
| <b>Vital Signs</b> <input type="checkbox"/> Unexamined, reason _____ |                                                                                                                                                                                     |                    |                                                                                                                                                                                                                                |
| Date                                                                 | <input type="text"/>   <input type="text"/>   <input type="text"/>  YEAR  <input type="text"/>   <input type="text"/>  MONTH  <input type="text"/>   <input type="text"/>  DAY      |                    |                                                                                                                                                                                                                                |
| Daily maximum temperature                                            | <input type="text"/>   <input type="text"/>   <input type="text"/>   <input type="text"/>   <input type="text"/>   <input type="text"/>  °C                                         | Measurement method | <input type="checkbox"/> 1 Axilla <input type="checkbox"/> 2 Oral <input type="checkbox"/> 3 Anus<br><input type="checkbox"/> 4 Ear <input type="checkbox"/> 5 Unknown <input type="checkbox"/> 6 Other, please describe _____ |
| Respiratory                                                          | <input type="text"/>   <input type="text"/>  times/min                                                                                                                              | Pulse              | <input type="text"/>   <input type="text"/>   <input type="text"/>  times/min                                                                                                                                                  |
| Blood pressure                                                       | <input type="text"/>   <input type="text"/>   <input type="text"/>  / <input type="text"/>   <input type="text"/>   <input type="text"/>   mmHg (Systolic/diastolic blood pressure) |                    |                                                                                                                                                                                                                                |

|                                                                                                                                                                 |                                                                                                                                                                                |
|-----------------------------------------------------------------------------------------------------------------------------------------------------------------|--------------------------------------------------------------------------------------------------------------------------------------------------------------------------------|
| <b>Respiratory symptoms</b> <input type="checkbox"/> Unexamined, reason _____                                                                                   |                                                                                                                                                                                |
| Date:                                                                                                                                                           | <input type="text"/>   <input type="text"/>   <input type="text"/>  YEAR  <input type="text"/>   <input type="text"/>  MONTH  <input type="text"/>   <input type="text"/>  DAY |
| Whether the subject has respiratory symptoms or not: <input type="checkbox"/> 0 NO <input type="checkbox"/> 1 NO, please describe: _____                        |                                                                                                                                                                                |
| Result: <input type="checkbox"/> 1 Normal <input type="checkbox"/> 2 AbnormalNo clinical significance <input type="checkbox"/> 3 AbnormalSignificant clinically |                                                                                                                                                                                |

| <b>Blood Count</b> <input type="checkbox"/> Unexamined, reason _____ |                                                                                        |                                                                                                                                                                                |                            |                                                                                                                                       |                            |                            |
|----------------------------------------------------------------------|----------------------------------------------------------------------------------------|--------------------------------------------------------------------------------------------------------------------------------------------------------------------------------|----------------------------|---------------------------------------------------------------------------------------------------------------------------------------|----------------------------|----------------------------|
| Date:                                                                |                                                                                        | <input type="text"/>   <input type="text"/>   <input type="text"/>  YEAR  <input type="text"/>   <input type="text"/>  MONTH  <input type="text"/>   <input type="text"/>  DAY |                            | Normal range Number: <input type="text"/>   <input type="text"/>   <input type="text"/>   <input type="text"/>   <input type="text"/> |                            |                            |
| Item                                                                 | Result                                                                                 |                                                                                                                                                                                | Result Interpretation      |                                                                                                                                       |                            | Unexamined                 |
|                                                                      | Measured Value                                                                         | Unit                                                                                                                                                                           | Normal                     | No clinical significance                                                                                                              | Significant clinically     |                            |
| Red Blood Cell (RBC)                                                 | <input type="checkbox"/> 1 10 <sup>12</sup> /L <input type="checkbox"/> 2 Other: _____ |                                                                                                                                                                                | <input type="checkbox"/> 1 | <input type="checkbox"/> 2                                                                                                            | <input type="checkbox"/> 3 | <input type="checkbox"/> 0 |
| White Blood Cell                                                     | <input type="checkbox"/> 1 10 <sup>9</sup> /L <input type="checkbox"/> 2 Other: _____  |                                                                                                                                                                                | <input type="checkbox"/> 1 | <input type="checkbox"/> 2                                                                                                            | <input type="checkbox"/> 3 | <input type="checkbox"/> 0 |
| Hemoglobin (Hb)                                                      | <input type="checkbox"/> 1 g/L <input type="checkbox"/> 2 Other: _____                 |                                                                                                                                                                                | <input type="checkbox"/> 1 | <input type="checkbox"/> 2                                                                                                            | <input type="checkbox"/> 3 | <input type="checkbox"/> 0 |
| Platelet (PLT)                                                       | <input type="checkbox"/> 1 10 <sup>9</sup> /L <input type="checkbox"/> 2 Other: _____  |                                                                                                                                                                                | <input type="checkbox"/> 1 | <input type="checkbox"/> 2                                                                                                            | <input type="checkbox"/> 3 | <input type="checkbox"/> 0 |
| Neutrophil (ANC)                                                     | <input type="checkbox"/> 1 10 <sup>9</sup> /L <input type="checkbox"/> 2 Other: _____  |                                                                                                                                                                                | <input type="checkbox"/> 1 | <input type="checkbox"/> 2                                                                                                            | <input type="checkbox"/> 3 | <input type="checkbox"/> 0 |
| Lymphocyte (LY)                                                      | <input type="checkbox"/> 1 10 <sup>9</sup> /L <input type="checkbox"/> 2 Other: _____  |                                                                                                                                                                                | <input type="checkbox"/> 1 | <input type="checkbox"/> 2                                                                                                            | <input type="checkbox"/> 3 | <input type="checkbox"/> 0 |
| Monocyte (MO)                                                        | <input type="checkbox"/> 1 10 <sup>9</sup> /L <input type="checkbox"/> 2 Other: _____  |                                                                                                                                                                                | <input type="checkbox"/> 1 | <input type="checkbox"/> 2                                                                                                            | <input type="checkbox"/> 3 | <input type="checkbox"/> 0 |
| Eosinophil (EO)                                                      | <input type="checkbox"/> 1 10 <sup>9</sup> /L <input type="checkbox"/> 2 Other: _____  |                                                                                                                                                                                | <input type="checkbox"/> 1 | <input type="checkbox"/> 2                                                                                                            | <input type="checkbox"/> 3 | <input type="checkbox"/> 0 |
| Basophil (BA)                                                        | <input type="checkbox"/> 1 10 <sup>9</sup> /L <input type="checkbox"/> 2 Other: _____  |                                                                                                                                                                                | <input type="checkbox"/> 1 | <input type="checkbox"/> 2                                                                                                            | <input type="checkbox"/> 3 | <input type="checkbox"/> 0 |

|                                                                             |
|-----------------------------------------------------------------------------|
| <b>Blood Biochemistry</b> <input type="checkbox"/> Unexamined, reason _____ |
|-----------------------------------------------------------------------------|

|                            |                  |
|----------------------------|------------------|
| Protocol Number: KY2020-29 | <b>Treatment</b> |
| Center Number [ ] [ ] [ ]  | Visit 3 (D7±1d)  |

| Date [ ] [ ] [ ] [ ]   YEAR [ ] [ ]   MONTH [ ] [ ]   DAY [ ] [ ] [ ] [ ] |                | Normal range Number: [ ] [ ] [ ] [ ] [ ] [ ]                                                    |                                       |                                       |                                       |                                       |
|---------------------------------------------------------------------------|----------------|-------------------------------------------------------------------------------------------------|---------------------------------------|---------------------------------------|---------------------------------------|---------------------------------------|
| Item                                                                      | Result         |                                                                                                 | Result Interpretation                 |                                       |                                       | Unexamined                            |
|                                                                           | Measured Value | Unit                                                                                            | Normal                                | Abnormal                              |                                       |                                       |
|                                                                           |                |                                                                                                 |                                       | No clinical significance              | Significant clinically                |                                       |
| Glutamic-pyruvic transaminase (ALT)                                       |                | <input type="checkbox"/> <sub>1</sub> U/L <input type="checkbox"/> <sub>2</sub> Other: _____    | <input type="checkbox"/> <sub>1</sub> | <input type="checkbox"/> <sub>2</sub> | <input type="checkbox"/> <sub>3</sub> | <input type="checkbox"/> <sub>0</sub> |
| Glutamic-oxalacetic transaminase (AST)                                    |                | <input type="checkbox"/> <sub>1</sub> U/L <input type="checkbox"/> <sub>2</sub> Other: _____    | <input type="checkbox"/> <sub>1</sub> | <input type="checkbox"/> <sub>2</sub> | <input type="checkbox"/> <sub>3</sub> | <input type="checkbox"/> <sub>0</sub> |
| Total Bilirubin (TBIL)                                                    |                | <input type="checkbox"/> <sub>1</sub> µmol/L <input type="checkbox"/> <sub>2</sub> Other: _____ | <input type="checkbox"/> <sub>1</sub> | <input type="checkbox"/> <sub>2</sub> | <input type="checkbox"/> <sub>3</sub> | <input type="checkbox"/> <sub>0</sub> |
| Albumin (ALB)                                                             |                | <input type="checkbox"/> <sub>1</sub> g/L <input type="checkbox"/> <sub>2</sub> Other: _____    | <input type="checkbox"/> <sub>1</sub> | <input type="checkbox"/> <sub>2</sub> | <input type="checkbox"/> <sub>3</sub> | <input type="checkbox"/> <sub>0</sub> |
| γ- glutamyl transpeptidase (GGT)                                          |                | <input type="checkbox"/> <sub>1</sub> U/L <input type="checkbox"/> <sub>2</sub> Other: _____    | <input type="checkbox"/> <sub>1</sub> | <input type="checkbox"/> <sub>2</sub> | <input type="checkbox"/> <sub>3</sub> | <input type="checkbox"/> <sub>0</sub> |
| Lactic dehydrogenase (LDH)                                                |                | <input type="checkbox"/> <sub>1</sub> U/L <input type="checkbox"/> <sub>2</sub> Other: _____    | <input type="checkbox"/> <sub>1</sub> | <input type="checkbox"/> <sub>2</sub> | <input type="checkbox"/> <sub>3</sub> | <input type="checkbox"/> <sub>0</sub> |
| Creatine kinase (CK)                                                      |                | <input type="checkbox"/> <sub>1</sub> U/L <input type="checkbox"/> <sub>2</sub> Other: _____    | <input type="checkbox"/> <sub>1</sub> | <input type="checkbox"/> <sub>2</sub> | <input type="checkbox"/> <sub>3</sub> | <input type="checkbox"/> <sub>0</sub> |
| Creatine kinase isoenzyme (CK-MB)                                         |                | <input type="checkbox"/> <sub>1</sub> U/L <input type="checkbox"/> <sub>2</sub> Other: _____    | <input type="checkbox"/> <sub>1</sub> | <input type="checkbox"/> <sub>2</sub> | <input type="checkbox"/> <sub>3</sub> | <input type="checkbox"/> <sub>0</sub> |
| Blood urea nitrogen (BUN)                                                 |                | <input type="checkbox"/> <sub>1</sub> mmol/L <input type="checkbox"/> <sub>2</sub> Other: _____ | <input type="checkbox"/> <sub>1</sub> | <input type="checkbox"/> <sub>2</sub> | <input type="checkbox"/> <sub>3</sub> | <input type="checkbox"/> <sub>0</sub> |
| Urea (Urea)                                                               |                | <input type="checkbox"/> <sub>1</sub> mmol/L <input type="checkbox"/> <sub>2</sub> Other: _____ | <input type="checkbox"/> <sub>1</sub> | <input type="checkbox"/> <sub>2</sub> | <input type="checkbox"/> <sub>3</sub> | <input type="checkbox"/> <sub>0</sub> |
| Serum creatinine (CR)                                                     |                | <input type="checkbox"/> <sub>1</sub> µmol/L <input type="checkbox"/> <sub>2</sub> Other: _____ | <input type="checkbox"/> <sub>1</sub> | <input type="checkbox"/> <sub>2</sub> | <input type="checkbox"/> <sub>3</sub> | <input type="checkbox"/> <sub>0</sub> |

| <b>Urine Test</b> <input type="checkbox"/> <sub>0</sub> Unexamined, reason _____ |                |                                                                                                         |                                       |                                       |                                       |                                       |
|----------------------------------------------------------------------------------|----------------|---------------------------------------------------------------------------------------------------------|---------------------------------------|---------------------------------------|---------------------------------------|---------------------------------------|
| <input type="checkbox"/> <sub>1</sub> Not Applicable                             |                |                                                                                                         |                                       |                                       |                                       |                                       |
| Date: [ ] [ ] [ ] [ ]   YEAR [ ] [ ]   MONTH [ ] [ ]   DAY [ ] [ ] [ ] [ ]       |                | Normal range Number: [ ] [ ] [ ] [ ] [ ] [ ]                                                            |                                       |                                       |                                       |                                       |
| Item                                                                             | Result         |                                                                                                         | Result Interpretation                 |                                       |                                       | Unexamined                            |
|                                                                                  | Measured Value | Unit                                                                                                    | Normal                                | Abnormal                              |                                       |                                       |
|                                                                                  |                |                                                                                                         |                                       | No clinical significance              | Significant clinically                |                                       |
| Urine Protein                                                                    |                | <input type="checkbox"/> <sub>1</sub> Not Applicable <input type="checkbox"/> <sub>2</sub> Other: _____ | <input type="checkbox"/> <sub>1</sub> | <input type="checkbox"/> <sub>2</sub> | <input type="checkbox"/> <sub>3</sub> | <input type="checkbox"/> <sub>0</sub> |
| Urine Glucose                                                                    |                | <input type="checkbox"/> <sub>1</sub> mmol/L <input type="checkbox"/> <sub>2</sub> Other: _____         | <input type="checkbox"/> <sub>1</sub> | <input type="checkbox"/> <sub>2</sub> | <input type="checkbox"/> <sub>3</sub> | <input type="checkbox"/> <sub>0</sub> |
| Urine PH value                                                                   |                | <input type="checkbox"/> <sub>1</sub> Not Applicable <input type="checkbox"/> <sub>2</sub> Other: _____ | <input type="checkbox"/> <sub>1</sub> | <input type="checkbox"/> <sub>2</sub> | <input type="checkbox"/> <sub>3</sub> | <input type="checkbox"/> <sub>0</sub> |
| Urine Erythrocyte                                                                |                | <input type="checkbox"/> <sub>1</sub> Not Applicable <input type="checkbox"/> <sub>2</sub> Other: _____ | <input type="checkbox"/> <sub>1</sub> | <input type="checkbox"/> <sub>2</sub> | <input type="checkbox"/> <sub>3</sub> | <input type="checkbox"/> <sub>0</sub> |
| Urine Leukocyte                                                                  |                | <input type="checkbox"/> <sub>1</sub> Not Applicable <input type="checkbox"/> <sub>2</sub> Other: _____ | <input type="checkbox"/> <sub>1</sub> | <input type="checkbox"/> <sub>2</sub> | <input type="checkbox"/> <sub>3</sub> | <input type="checkbox"/> <sub>0</sub> |
| Urine Ketone                                                                     |                | <input type="checkbox"/> <sub>1</sub> Not Applicable <input type="checkbox"/> <sub>2</sub> Other: _____ | <input type="checkbox"/> <sub>1</sub> | <input type="checkbox"/> <sub>2</sub> | <input type="checkbox"/> <sub>3</sub> | <input type="checkbox"/> <sub>0</sub> |

|                            |                  |
|----------------------------|------------------|
| Protocol Number: KY2020-29 | <b>Treatment</b> |
| Center Number [ ] [ ] [ ]  | Visit 3 (D7±1d)  |

| <b>Coagulation Function</b> <input type="checkbox"/> Unexamined, reason _____ |                |                                                                                                         |                                              |                                       |                                       |                                       |
|-------------------------------------------------------------------------------|----------------|---------------------------------------------------------------------------------------------------------|----------------------------------------------|---------------------------------------|---------------------------------------|---------------------------------------|
| Date: [ ] [ ] [ ] [ ]   YEAR   [ ] [ ]   MONTH   [ ] [ ]   DAY                |                |                                                                                                         | Normal range Number: [ ] [ ] [ ] [ ] [ ] [ ] |                                       |                                       |                                       |
| Item                                                                          | Result         |                                                                                                         | Result Interpretation                        |                                       |                                       | Unexamined                            |
|                                                                               | Measured Value | Unit                                                                                                    | Normal                                       | Abnormal                              |                                       |                                       |
| Prothrombin Time (PT)                                                         |                | <input type="checkbox"/> <sub>1</sub> S <input type="checkbox"/> <sub>2</sub> Other: _____              | <input type="checkbox"/> <sub>1</sub>        | <input type="checkbox"/> <sub>2</sub> | <input type="checkbox"/> <sub>3</sub> | <input type="checkbox"/> <sub>0</sub> |
| Activated Partial Thromboplastin Time (APTT)                                  |                | <input type="checkbox"/> <sub>1</sub> S <input type="checkbox"/> <sub>2</sub> Other: _____              | <input type="checkbox"/> <sub>1</sub>        | <input type="checkbox"/> <sub>2</sub> | <input type="checkbox"/> <sub>3</sub> | <input type="checkbox"/> <sub>0</sub> |
| Thrombin Time (TT)                                                            |                | <input type="checkbox"/> <sub>1</sub> S <input type="checkbox"/> <sub>2</sub> Other: _____              | <input type="checkbox"/> <sub>1</sub>        | <input type="checkbox"/> <sub>2</sub> | <input type="checkbox"/> <sub>3</sub> | <input type="checkbox"/> <sub>0</sub> |
| Fibrinogen (Fbg)                                                              |                | <input type="checkbox"/> <sub>1</sub> g/L <input type="checkbox"/> <sub>2</sub> Other: _____            | <input type="checkbox"/> <sub>1</sub>        | <input type="checkbox"/> <sub>2</sub> | <input type="checkbox"/> <sub>3</sub> | <input type="checkbox"/> <sub>0</sub> |
| International Normalized Ratio (INR)                                          |                | <input type="checkbox"/> <sub>1</sub> Not Applicable <input type="checkbox"/> <sub>2</sub> Other: _____ | <input type="checkbox"/> <sub>1</sub>        | <input type="checkbox"/> <sub>2</sub> | <input type="checkbox"/> <sub>3</sub> | <input type="checkbox"/> <sub>0</sub> |

| <b>C-REACTION PROTEIN (CRP)</b> <input type="checkbox"/> Unexamined, reason _____ |                |                                                                                               |                                              |                                       |                                       |
|-----------------------------------------------------------------------------------|----------------|-----------------------------------------------------------------------------------------------|----------------------------------------------|---------------------------------------|---------------------------------------|
| Date: [ ] [ ] [ ] [ ]   YEAR   [ ] [ ]   MONTH   [ ] [ ]   DAY                    |                |                                                                                               | Normal range Number: [ ] [ ] [ ] [ ] [ ] [ ] |                                       |                                       |
| Item                                                                              | Result         |                                                                                               | Result Interpretation                        |                                       |                                       |
|                                                                                   | Measured Value | Unit                                                                                          | Normal                                       | Abnormal                              |                                       |
| C-REACTION PROTEIN (CRP)                                                          |                | <input type="checkbox"/> <sub>1</sub> mg/L <input type="checkbox"/> <sub>2</sub> Other: _____ | <input type="checkbox"/> <sub>1</sub>        | <input type="checkbox"/> <sub>2</sub> | <input type="checkbox"/> <sub>3</sub> |

| <b>Erythrocyte Sedimentation Rate (ESR)</b> <input type="checkbox"/> Unexamined, reason _____ |                |                                                                                               |                                              |                                       |                                       |
|-----------------------------------------------------------------------------------------------|----------------|-----------------------------------------------------------------------------------------------|----------------------------------------------|---------------------------------------|---------------------------------------|
| Date: [ ] [ ] [ ] [ ]   YEAR   [ ] [ ]   MONTH   [ ] [ ]   DAY                                |                |                                                                                               | Normal range Number: [ ] [ ] [ ] [ ] [ ] [ ] |                                       |                                       |
| Item                                                                                          | Result         |                                                                                               | Result Interpretation                        |                                       |                                       |
|                                                                                               | Measured Value | Unit                                                                                          | Normal                                       | Abnormal                              |                                       |
| Erythrocyte Sedimentation Rate (ESR)                                                          |                | <input type="checkbox"/> <sub>1</sub> mm/h <input type="checkbox"/> <sub>2</sub> Other: _____ | <input type="checkbox"/> <sub>1</sub>        | <input type="checkbox"/> <sub>2</sub> | <input type="checkbox"/> <sub>3</sub> |

| <b>TNF-α</b> <input type="checkbox"/> Unexamined, reason _____ |                |                                                                                                |                                              |                                       |                                       |
|----------------------------------------------------------------|----------------|------------------------------------------------------------------------------------------------|----------------------------------------------|---------------------------------------|---------------------------------------|
| Date: [ ] [ ] [ ] [ ]   YEAR   [ ] [ ]   MONTH   [ ] [ ]   DAY |                |                                                                                                | Normal range Number: [ ] [ ] [ ] [ ] [ ] [ ] |                                       |                                       |
| Item                                                           | Result         |                                                                                                | Result Interpretation                        |                                       |                                       |
|                                                                | Measured Value | Unit                                                                                           | Normal                                       | Abnormal                              |                                       |
| TNF-α                                                          |                | <input type="checkbox"/> <sub>1</sub> pg/mL <input type="checkbox"/> <sub>2</sub> Other: _____ | <input type="checkbox"/> <sub>1</sub>        | <input type="checkbox"/> <sub>2</sub> | <input type="checkbox"/> <sub>3</sub> |



|                            |                  |
|----------------------------|------------------|
| Protocol Number: KY2020-29 | <b>Treatment</b> |
| Center Number [ ] [ ]      | Visit 3 (D7±1d)  |

| <b>IL-6</b> <input type="checkbox"/> Unexamined, reason _____  |                |                                              |                                       |                                       |                                       |
|----------------------------------------------------------------|----------------|----------------------------------------------|---------------------------------------|---------------------------------------|---------------------------------------|
| Date: [ ] [ ] [ ] [ ]   YEAR   [ ] [ ]   MONTH   [ ] [ ]   DAY |                |                                              |                                       |                                       | Normal range                          |
| Number: [ ] [ ] [ ] [ ]                                        |                |                                              |                                       |                                       |                                       |
| Item                                                           | Result         |                                              | Result Interpretation                 |                                       |                                       |
|                                                                | Measured Value | Unit                                         | Normal                                | Abnormal                              |                                       |
| No clinical significance                                       |                |                                              |                                       | Significant clinically                |                                       |
| IL-6                                                           |                | <input type="checkbox"/> <sub>1</sub> pg/mL  | <input type="checkbox"/> <sub>1</sub> | <input type="checkbox"/> <sub>2</sub> | <input type="checkbox"/> <sub>3</sub> |
|                                                                |                | <input type="checkbox"/> <sub>2</sub> Other: |                                       |                                       |                                       |

|                                                                                                                                                                                                                               |                         |
|-------------------------------------------------------------------------------------------------------------------------------------------------------------------------------------------------------------------------------|-------------------------|
| <b>Nucleic Acid Test of 2019-nCov</b> <input type="checkbox"/> Unexamined, reason _____                                                                                                                                       |                         |
| <input type="checkbox"/> <sub>1</sub> Not Applicable                                                                                                                                                                          |                         |
| Sampling Part: <input type="checkbox"/> <sub>1</sub> Upper respiratory tract <input type="checkbox"/> <sub>2</sub> Lower respiratory tract                                                                                    |                         |
| Date: [ ] [ ] [ ] [ ]   YEAR   [ ] [ ]   MONTH   [ ] [ ]   DAY                                                                                                                                                                | Date: [ ] [ ] : [ ] [ ] |
| Result : <input type="checkbox"/> <sub>1</sub> Negative <input type="checkbox"/> <sub>2</sub> Positive <input type="checkbox"/> <sub>3</sub> Unidentified <input type="checkbox"/> <sub>4</sub> Other , please describe _____ |                         |

|                                                                                                               |
|---------------------------------------------------------------------------------------------------------------|
| <b>Pulse oxygen saturation (without oxygen inhalation )</b> <input type="checkbox"/> Unexamined, reason _____ |
| Date: [ ] [ ] [ ] [ ]   YEAR   [ ] [ ]   MONTH   [ ] [ ]   DAY                                                |
| Measured Value: _____ % (Rest state)                                                                          |

|                                                                                                                                |
|--------------------------------------------------------------------------------------------------------------------------------|
| <b>Whether develops into severe/critical type</b> <input type="checkbox"/> No evaluation                                       |
| Date [ ] [ ] [ ] [ ]   YEAR   [ ] [ ]   MONTH   [ ] [ ]   DAY                                                                  |
| Whether develops into severe/critical type: <input type="checkbox"/> <sub>0</sub> NO <input type="checkbox"/> <sub>1</sub> YES |
| Date of developing into severe/critical type: [ ] [ ] [ ] [ ]   YEAR   [ ] [ ]   MONTH   [ ] [ ]   DAY                         |
| Date of developing into severe/critical type: [ ] [ ] [ ] [ ]   YEAR   [ ] [ ]   MONTH   [ ] [ ]   DAY                         |

**If any adverse events have occurred since the last visit, please fill in the “Adverse Events Form”. If there is medication combination, please fill in the “Previous/Combined medication Form”; If there is combined non-drug therapy, please fill in the “Comined Non-Drug Therapy Form”; If there is an out-of-plan inspection, please fill in the “Out-Of-Plan Inspection Form”.**

|                                     |                  |
|-------------------------------------|------------------|
| Protocol Number: KY2020-29          | <b>Treatment</b> |
| Center Number: <input type="text"/> | Visit 4 (D10±1d) |

**Date of Current Visit:** |||YEAR|||MONTH|||DAY

|                                                                                   |                                                                                                                                                                                     |                    |                                                                                                                                                                                                                                                                                                  |
|-----------------------------------------------------------------------------------|-------------------------------------------------------------------------------------------------------------------------------------------------------------------------------------|--------------------|--------------------------------------------------------------------------------------------------------------------------------------------------------------------------------------------------------------------------------------------------------------------------------------------------|
| <b>Vital Signs</b> <input type="checkbox"/> <sub>0</sub> Unexamined, reason _____ |                                                                                                                                                                                     |                    |                                                                                                                                                                                                                                                                                                  |
| Date                                                                              | <input type="text"/>   <input type="text"/>   <input type="text"/>  YEAR  <input type="text"/>   <input type="text"/>  MONTH  <input type="text"/>   <input type="text"/>  DAY      |                    |                                                                                                                                                                                                                                                                                                  |
| Daily maximum temperature                                                         | <input type="text"/>   <input type="text"/>   <input type="text"/>   <input type="text"/>  °C                                                                                       | Measurement method | <input type="checkbox"/> <sub>1</sub> Axilla <input type="checkbox"/> <sub>2</sub> Oral <input type="checkbox"/> <sub>3</sub> Anus<br><input type="checkbox"/> <sub>4</sub> Ear <input type="checkbox"/> <sub>5</sub> Unknown <input type="checkbox"/> <sub>6</sub> Other, please describe _____ |
| Respiratory                                                                       | <input type="text"/>   <input type="text"/>  times/min                                                                                                                              | Pulse              | <input type="text"/>   <input type="text"/>   <input type="text"/>  times/min                                                                                                                                                                                                                    |
| Blood pressure                                                                    | <input type="text"/>   <input type="text"/>   <input type="text"/>  / <input type="text"/>   <input type="text"/>   <input type="text"/>   mmHg (Systolic/diastolic blood pressure) |                    |                                                                                                                                                                                                                                                                                                  |

|                                                                                                                                                                                                  |                                                                                                                                                                                |
|--------------------------------------------------------------------------------------------------------------------------------------------------------------------------------------------------|--------------------------------------------------------------------------------------------------------------------------------------------------------------------------------|
| <b>Respiratory symptoms</b> <input type="checkbox"/> <sub>0</sub> Unexamined, reason _____                                                                                                       |                                                                                                                                                                                |
| Date:                                                                                                                                                                                            | <input type="text"/>   <input type="text"/>   <input type="text"/>  YEAR  <input type="text"/>   <input type="text"/>  MONTH  <input type="text"/>   <input type="text"/>  DAY |
| Whether the subject has respiratory symptoms or not: <input type="checkbox"/> <sub>0</sub> NO <input type="checkbox"/> <sub>1</sub> NO, please describe: _____                                   |                                                                                                                                                                                |
| Result: <input type="checkbox"/> <sub>1</sub> Normal <input type="checkbox"/> <sub>2</sub> AbnormalNo clinical significance <input type="checkbox"/> <sub>3</sub> AbnormalSignificant clinically |                                                                                                                                                                                |

| <b>Blood Count</b> <input type="checkbox"/> <sub>0</sub> Unexamined, reason _____ |                                                                                                                                                                                |      |                                       |                                                                                           |                                       |                                       |
|-----------------------------------------------------------------------------------|--------------------------------------------------------------------------------------------------------------------------------------------------------------------------------|------|---------------------------------------|-------------------------------------------------------------------------------------------|---------------------------------------|---------------------------------------|
| Date:                                                                             | <input type="text"/>   <input type="text"/>   <input type="text"/>  YEAR  <input type="text"/>   <input type="text"/>  MONTH  <input type="text"/>   <input type="text"/>  DAY |      | Normal range Number:                  | <input type="text"/>   <input type="text"/>   <input type="text"/>   <input type="text"/> |                                       |                                       |
| Item                                                                              | Result                                                                                                                                                                         |      | Result Interpretation                 |                                                                                           |                                       | Unexamined                            |
|                                                                                   | Measured Value                                                                                                                                                                 | Unit | Normal                                | No clinical significance                                                                  | Significant clinically                |                                       |
| Red Blood Cell (RBC)                                                              | <input type="checkbox"/> <sub>1</sub> 10 <sup>12</sup> /L <input type="checkbox"/> <sub>2</sub> Other: _____                                                                   |      | <input type="checkbox"/> <sub>1</sub> | <input type="checkbox"/> <sub>2</sub>                                                     | <input type="checkbox"/> <sub>3</sub> | <input type="checkbox"/> <sub>0</sub> |
| White Blood Cell                                                                  | <input type="checkbox"/> <sub>1</sub> 10 <sup>9</sup> /L <input type="checkbox"/> <sub>2</sub> Other: _____                                                                    |      | <input type="checkbox"/> <sub>1</sub> | <input type="checkbox"/> <sub>2</sub>                                                     | <input type="checkbox"/> <sub>3</sub> | <input type="checkbox"/> <sub>0</sub> |
| Hemoglobin (Hb)                                                                   | <input type="checkbox"/> <sub>1</sub> g/L <input type="checkbox"/> <sub>2</sub> Other: _____                                                                                   |      | <input type="checkbox"/> <sub>1</sub> | <input type="checkbox"/> <sub>2</sub>                                                     | <input type="checkbox"/> <sub>3</sub> | <input type="checkbox"/> <sub>0</sub> |
| Platelet (PLT)                                                                    | <input type="checkbox"/> <sub>1</sub> 10 <sup>9</sup> /L <input type="checkbox"/> <sub>2</sub> Other: _____                                                                    |      | <input type="checkbox"/> <sub>1</sub> | <input type="checkbox"/> <sub>2</sub>                                                     | <input type="checkbox"/> <sub>3</sub> | <input type="checkbox"/> <sub>0</sub> |
| Neutrophil (ANC)                                                                  | <input type="checkbox"/> <sub>1</sub> 10 <sup>9</sup> /L <input type="checkbox"/> <sub>2</sub> Other: _____                                                                    |      | <input type="checkbox"/> <sub>1</sub> | <input type="checkbox"/> <sub>2</sub>                                                     | <input type="checkbox"/> <sub>3</sub> | <input type="checkbox"/> <sub>0</sub> |
| Lymphocyte (LY)                                                                   | <input type="checkbox"/> <sub>1</sub> 10 <sup>9</sup> /L <input type="checkbox"/> <sub>2</sub> Other: _____                                                                    |      | <input type="checkbox"/> <sub>1</sub> | <input type="checkbox"/> <sub>2</sub>                                                     | <input type="checkbox"/> <sub>3</sub> | <input type="checkbox"/> <sub>0</sub> |
| Monocyte (MO)                                                                     | <input type="checkbox"/> <sub>1</sub> 10 <sup>9</sup> /L <input type="checkbox"/> <sub>2</sub> Other: _____                                                                    |      | <input type="checkbox"/> <sub>1</sub> | <input type="checkbox"/> <sub>2</sub>                                                     | <input type="checkbox"/> <sub>3</sub> | <input type="checkbox"/> <sub>0</sub> |
| Eosinophil (EO)                                                                   | <input type="checkbox"/> <sub>1</sub> 10 <sup>9</sup> /L <input type="checkbox"/> <sub>2</sub> Other: _____                                                                    |      | <input type="checkbox"/> <sub>1</sub> | <input type="checkbox"/> <sub>2</sub>                                                     | <input type="checkbox"/> <sub>3</sub> | <input type="checkbox"/> <sub>0</sub> |
| Basophil (BA)                                                                     | <input type="checkbox"/> <sub>1</sub> 10 <sup>9</sup> /L <input type="checkbox"/> <sub>2</sub> Other: _____                                                                    |      | <input type="checkbox"/> <sub>1</sub> | <input type="checkbox"/> <sub>2</sub>                                                     | <input type="checkbox"/> <sub>3</sub> | <input type="checkbox"/> <sub>0</sub> |

|                                                                                          |
|------------------------------------------------------------------------------------------|
| <b>Blood Biochemistry</b> <input type="checkbox"/> <sub>0</sub> Unexamined, reason _____ |
|------------------------------------------------------------------------------------------|

|                                     |                                               |
|-------------------------------------|-----------------------------------------------|
| Protocol Number: KY2020-29          | <b>Treatment</b>                              |
| Center Number: <input type="text"/> | Subject Screening Number <input type="text"/> |
| Visit 4 (D10±1d)                    |                                               |

Date: |||YEAR|||MONTH|||DAY  
 Normal range Number:

| Item                                   | Result         |                                                                                                 | Result Interpretation                 |                                       |                                       | Unexamined                            |
|----------------------------------------|----------------|-------------------------------------------------------------------------------------------------|---------------------------------------|---------------------------------------|---------------------------------------|---------------------------------------|
|                                        | Measured Value | Unit                                                                                            | Normal                                | Abnormal                              |                                       |                                       |
|                                        |                |                                                                                                 |                                       | No clinical significance              | Significant clinically                |                                       |
| Glutamic-pyruvic transaminase (ALT)    |                | <input type="checkbox"/> <sub>1</sub> U/L <input type="checkbox"/> <sub>2</sub> Other: _____    | <input type="checkbox"/> <sub>1</sub> | <input type="checkbox"/> <sub>2</sub> | <input type="checkbox"/> <sub>3</sub> | <input type="checkbox"/> <sub>0</sub> |
| Glutamic-oxalacetic transaminase (AST) |                | <input type="checkbox"/> <sub>1</sub> U/L <input type="checkbox"/> <sub>2</sub> Other: _____    | <input type="checkbox"/> <sub>1</sub> | <input type="checkbox"/> <sub>2</sub> | <input type="checkbox"/> <sub>3</sub> | <input type="checkbox"/> <sub>0</sub> |
| Total Bilirubin (TBIL)                 |                | <input type="checkbox"/> <sub>1</sub> µmol/L <input type="checkbox"/> <sub>2</sub> Other: _____ | <input type="checkbox"/> <sub>1</sub> | <input type="checkbox"/> <sub>2</sub> | <input type="checkbox"/> <sub>3</sub> | <input type="checkbox"/> <sub>0</sub> |
| Albumin (ALB)                          |                | <input type="checkbox"/> <sub>1</sub> g/L <input type="checkbox"/> <sub>2</sub> Other: _____    | <input type="checkbox"/> <sub>1</sub> | <input type="checkbox"/> <sub>2</sub> | <input type="checkbox"/> <sub>3</sub> | <input type="checkbox"/> <sub>0</sub> |
| γ- glutamyl transpeptidase (GGT)       |                | <input type="checkbox"/> <sub>1</sub> U/L <input type="checkbox"/> <sub>2</sub> Other: _____    | <input type="checkbox"/> <sub>1</sub> | <input type="checkbox"/> <sub>2</sub> | <input type="checkbox"/> <sub>3</sub> | <input type="checkbox"/> <sub>0</sub> |
| Lactic dehydrogenase (LDH)             |                | <input type="checkbox"/> <sub>1</sub> U/L <input type="checkbox"/> <sub>2</sub> Other: _____    | <input type="checkbox"/> <sub>1</sub> | <input type="checkbox"/> <sub>2</sub> | <input type="checkbox"/> <sub>3</sub> | <input type="checkbox"/> <sub>0</sub> |
| Creatine kinase (CK)                   |                | <input type="checkbox"/> <sub>1</sub> U/L <input type="checkbox"/> <sub>2</sub> Other: _____    | <input type="checkbox"/> <sub>1</sub> | <input type="checkbox"/> <sub>2</sub> | <input type="checkbox"/> <sub>3</sub> | <input type="checkbox"/> <sub>0</sub> |
| Creatine kinase isoenzyme (CK-MB)      |                | <input type="checkbox"/> <sub>1</sub> U/L <input type="checkbox"/> <sub>2</sub> Other: _____    | <input type="checkbox"/> <sub>1</sub> | <input type="checkbox"/> <sub>2</sub> | <input type="checkbox"/> <sub>3</sub> | <input type="checkbox"/> <sub>0</sub> |
| Blood urea nitrogen (BUN)              |                | <input type="checkbox"/> <sub>1</sub> mmol/L <input type="checkbox"/> <sub>2</sub> Other: _____ | <input type="checkbox"/> <sub>1</sub> | <input type="checkbox"/> <sub>2</sub> | <input type="checkbox"/> <sub>3</sub> | <input type="checkbox"/> <sub>0</sub> |
| Urea (Urea)                            |                | <input type="checkbox"/> <sub>1</sub> mmol/L <input type="checkbox"/> <sub>2</sub> Other: _____ | <input type="checkbox"/> <sub>1</sub> | <input type="checkbox"/> <sub>2</sub> | <input type="checkbox"/> <sub>3</sub> | <input type="checkbox"/> <sub>0</sub> |
| Serum creatinine (CR)                  |                | <input type="checkbox"/> <sub>1</sub> µmol/L <input type="checkbox"/> <sub>2</sub> Other: _____ | <input type="checkbox"/> <sub>1</sub> | <input type="checkbox"/> <sub>2</sub> | <input type="checkbox"/> <sub>3</sub> | <input type="checkbox"/> <sub>0</sub> |

**Urine Test**    <sub>0</sub>Unexamined, reason \_\_\_\_\_  
<sub>1</sub> Not Applicable

Date: |||YEAR|||MONTH|||DAY    Normal range Number:

| Item              | Measured Value | Unit                                                                                                    | Normal                                | Abnormal                              |                                       | Unexamined                            |
|-------------------|----------------|---------------------------------------------------------------------------------------------------------|---------------------------------------|---------------------------------------|---------------------------------------|---------------------------------------|
|                   |                |                                                                                                         |                                       | No clinical significance              | Significant clinically                |                                       |
|                   |                |                                                                                                         |                                       | Urine Protein                         |                                       |                                       |
| Urine Glucose     |                | <input type="checkbox"/> <sub>1</sub> mmol/L <input type="checkbox"/> <sub>2</sub> Other: _____         | <input type="checkbox"/> <sub>1</sub> | <input type="checkbox"/> <sub>2</sub> | <input type="checkbox"/> <sub>3</sub> | <input type="checkbox"/> <sub>0</sub> |
| Urine PH value    |                | <input type="checkbox"/> <sub>1</sub> Not Applicable <input type="checkbox"/> <sub>2</sub> Other: _____ | <input type="checkbox"/> <sub>1</sub> | <input type="checkbox"/> <sub>2</sub> | <input type="checkbox"/> <sub>3</sub> | <input type="checkbox"/> <sub>0</sub> |
| Urine Erythrocyte |                | <input type="checkbox"/> <sub>1</sub> Not Applicable <input type="checkbox"/> <sub>2</sub> Other: _____ | <input type="checkbox"/> <sub>1</sub> | <input type="checkbox"/> <sub>2</sub> | <input type="checkbox"/> <sub>3</sub> | <input type="checkbox"/> <sub>0</sub> |
| Urine Leukocyte   |                | <input type="checkbox"/> <sub>1</sub> Not Applicable <input type="checkbox"/> <sub>2</sub> Other: _____ | <input type="checkbox"/> <sub>1</sub> | <input type="checkbox"/> <sub>2</sub> | <input type="checkbox"/> <sub>3</sub> | <input type="checkbox"/> <sub>0</sub> |
| Urine Ketone      |                | <input type="checkbox"/> <sub>1</sub> Not Applicable <input type="checkbox"/> <sub>2</sub> Other: _____ | <input type="checkbox"/> <sub>1</sub> | <input type="checkbox"/> <sub>2</sub> | <input type="checkbox"/> <sub>3</sub> | <input type="checkbox"/> <sub>0</sub> |

**Coagulation Function**    <sub>0</sub>Unexamined, reason \_\_\_\_\_

|                                     |                                               |
|-------------------------------------|-----------------------------------------------|
| Protocol Number: KY2020-29          | <b>Treatment</b>                              |
| Center Number: <input type="text"/> | Subject Screening Number <input type="text"/> |
| Visit 4 (D10±1d)                    |                                               |

Date: |||YEAR|||MONTH|||DAY      Normal range Number:

| Item                                         | Result         |                                                                                                         | Result Interpretation                 |                                       |                                       | Unexamined                            |
|----------------------------------------------|----------------|---------------------------------------------------------------------------------------------------------|---------------------------------------|---------------------------------------|---------------------------------------|---------------------------------------|
|                                              | Measured Value | Unit                                                                                                    | Normal                                | Abnormal                              |                                       |                                       |
|                                              |                |                                                                                                         |                                       | No clinical significance              | Significant clinically                |                                       |
| Prothrombin Time (PT)                        |                | <input type="checkbox"/> <sub>1</sub> S <input type="checkbox"/> <sub>2</sub> Other: _____              | <input type="checkbox"/> <sub>1</sub> | <input type="checkbox"/> <sub>2</sub> | <input type="checkbox"/> <sub>3</sub> | <input type="checkbox"/> <sub>0</sub> |
| Activated Partial Thromboplastin Time (APTT) |                | <input type="checkbox"/> <sub>1</sub> S <input type="checkbox"/> <sub>2</sub> Other: _____              | <input type="checkbox"/> <sub>1</sub> | <input type="checkbox"/> <sub>2</sub> | <input type="checkbox"/> <sub>3</sub> | <input type="checkbox"/> <sub>0</sub> |
| Thrombin Time (TT)                           |                | <input type="checkbox"/> <sub>1</sub> S <input type="checkbox"/> <sub>2</sub> Other: _____              | <input type="checkbox"/> <sub>1</sub> | <input type="checkbox"/> <sub>2</sub> | <input type="checkbox"/> <sub>3</sub> | <input type="checkbox"/> <sub>0</sub> |
| Fibrinogen (Fbg)                             |                | <input type="checkbox"/> <sub>1</sub> g/L <input type="checkbox"/> <sub>2</sub> Other: _____            | <input type="checkbox"/> <sub>1</sub> | <input type="checkbox"/> <sub>2</sub> | <input type="checkbox"/> <sub>3</sub> | <input type="checkbox"/> <sub>0</sub> |
| International Normalized Ratio (INR)         |                | <input type="checkbox"/> <sub>1</sub> Not Applicable <input type="checkbox"/> <sub>2</sub> Other: _____ | <input type="checkbox"/> <sub>1</sub> | <input type="checkbox"/> <sub>2</sub> | <input type="checkbox"/> <sub>3</sub> | <input type="checkbox"/> <sub>0</sub> |

**C-REACTION PROTEIN (CRP)**    <sub>0</sub>Unexamined, reason \_\_\_\_\_

Date: |||YEAR|||MONTH|||DAY      Normal range Number:

| Item                     | Result         |                                                                                               | Result Interpretation                 |                                       |                                       |
|--------------------------|----------------|-----------------------------------------------------------------------------------------------|---------------------------------------|---------------------------------------|---------------------------------------|
|                          | Measured Value | Unit                                                                                          | Normal                                | Abnormal                              |                                       |
|                          |                |                                                                                               |                                       | No clinical significance              | Significant clinically                |
| C-REACTION PROTEIN (CRP) |                | <input type="checkbox"/> <sub>1</sub> mg/L <input type="checkbox"/> <sub>2</sub> Other: _____ | <input type="checkbox"/> <sub>1</sub> | <input type="checkbox"/> <sub>2</sub> | <input type="checkbox"/> <sub>3</sub> |

**Erythrocyte Sedimentation Rate (ESR)**    <sub>0</sub>Unexamined, reason \_\_\_\_\_

Date: |||YEAR|||MONTH|||DAY      Normal range Number:

| Item                                 | Result         |                                                                                               | Result Interpretation                 |                                       |                                       |
|--------------------------------------|----------------|-----------------------------------------------------------------------------------------------|---------------------------------------|---------------------------------------|---------------------------------------|
|                                      | Measured Value | Unit                                                                                          | Normal                                | Abnormal                              |                                       |
|                                      |                |                                                                                               |                                       | No clinical significance              | Significant clinically                |
| Erythrocyte Sedimentation Rate (ESR) |                | <input type="checkbox"/> <sub>1</sub> mm/h <input type="checkbox"/> <sub>2</sub> Other: _____ | <input type="checkbox"/> <sub>1</sub> | <input type="checkbox"/> <sub>2</sub> | <input type="checkbox"/> <sub>3</sub> |

**TNF-α**    <sub>0</sub>Unexamined, reason \_\_\_\_\_

Date: |||YEAR|||MONTH|||DAY      Normal range Number:

| Item  | Result         |                                                                                                | Result Interpretation                 |                                       |                                       |
|-------|----------------|------------------------------------------------------------------------------------------------|---------------------------------------|---------------------------------------|---------------------------------------|
|       | Measured Value | Unit                                                                                           | Normal                                | Abnormal                              |                                       |
|       |                |                                                                                                |                                       | No clinical significance              | Significant clinically                |
| TNF-α |                | <input type="checkbox"/> <sub>1</sub> pg/mL <input type="checkbox"/> <sub>2</sub> Other: _____ | <input type="checkbox"/> <sub>1</sub> | <input type="checkbox"/> <sub>2</sub> | <input type="checkbox"/> <sub>3</sub> |

**IL-6**    <sub>0</sub>Unexamined, reason \_\_\_\_\_

|                            |                  |
|----------------------------|------------------|
| Protocol Number: KY2020-29 | <b>Treatment</b> |
| Center Number: [ ] [ ]     | Visit 4 (D10±1d) |

Date: [ ] [ ] [ ] [ ] |YEAR| [ ] [ ] |MONTH| [ ] [ ] |DAY      Normal range Number: [ ] [ ] [ ] [ ]

| Item                     | Result         |                                                                    | Result Interpretation      |                            |                            |
|--------------------------|----------------|--------------------------------------------------------------------|----------------------------|----------------------------|----------------------------|
|                          | Measured Value | Unit                                                               | Normal                     | Abnormal                   |                            |
| No clinical significance |                |                                                                    |                            | Significant clinically     |                            |
| IL-6                     |                | <input type="checkbox"/> 1 pg/mL <input type="checkbox"/> 2 Other: | <input type="checkbox"/> 1 | <input type="checkbox"/> 2 | <input type="checkbox"/> 3 |

**Nucleic Acid Test of 2019-nCov**      0 Unexamined, reason \_\_\_\_\_

Sampling Part (multiple choice): 1 Upper respiratory tract    2 Lower respiratory tract

|                         |                                                                                                                                                                                                                                              |
|-------------------------|----------------------------------------------------------------------------------------------------------------------------------------------------------------------------------------------------------------------------------------------|
| Upper respiratory tract | Date: [ ] [ ] [ ] [ ]  YEAR  [ ] [ ]  MONTH  [ ] [ ]  DAY<br>Result: <input type="checkbox"/> 1 Negative <input type="checkbox"/> 2 Positive <input type="checkbox"/> 3 Unidentified <input type="checkbox"/> 4 Other, please describe _____ |
| Lower respiratory tract | Date: [ ] [ ] [ ] [ ]  YEAR  [ ] [ ]  MONTH  [ ] [ ]  DAY<br>Result: <input type="checkbox"/> 1 Negative <input type="checkbox"/> 2 Positive <input type="checkbox"/> 3 Unidentified <input type="checkbox"/> 4 Other, please describe _____ |
| Result                  | <input type="checkbox"/> 1 Negative <input type="checkbox"/> 2 Positive <input type="checkbox"/> 3 Unidentified <input type="checkbox"/> 4 Other, please describe _____                                                                      |

**Pulse oxygen saturation (without oxygen inhalation )**      0 Unexamined, reason \_\_\_\_\_

Date: [ ] [ ] [ ] [ ] |YEAR| [ ] [ ] |MONTH| [ ] [ ] |DAY

Measured Value: \_\_\_\_\_% (Rest state)

**Whether develops into severe/critical type**      0 No Evaluation

Date [ ] [ ] [ ] [ ] |YEAR| [ ] [ ] |MONTH| [ ] [ ] |DAY

Whether develops into severe/critical type:      0 NO      1 YES

Date of developing into severe/critical type: [ ] [ ] [ ] [ ] |YEAR| [ ] [ ] |MONTH| [ ] [ ] |DAY

**If any adverse events have occurred since the last visit, please fill in the “Adverse Events Form”. If there is medication combination, please fill in the “Previous/Combined medication Form”; If there is combined non-drug therapy, please fill in the “Comined Non-Drug Therapy Form”; If there is an out-of-plan inspection, please fill in the “Out-Of-Plan Inspection Form”.**

|                            |                  |
|----------------------------|------------------|
| Protocol Number: KY2020-29 | <b>Treatment</b> |
| Center Number [ ] [ ]      | Visit 5 (D14±1d) |

**Date of Current Visit:** [ ] [ ] [ ] [ ] |YEAR| [ ] [ ] |MONTH| [ ] [ ] |DAY

**Vital Signs**       Unexamined, reason \_\_\_\_\_

|                           |                                                                            |                    |                                                                                                                                                                                                                                |
|---------------------------|----------------------------------------------------------------------------|--------------------|--------------------------------------------------------------------------------------------------------------------------------------------------------------------------------------------------------------------------------|
| Date                      | [ ] [ ] [ ] [ ]  YEAR  [ ] [ ]  MONTH  [ ] [ ]  DAY                        |                    |                                                                                                                                                                                                                                |
| Daily maximum temperature | [ ] [ ] [ ] [ ] °C                                                         | Measurement method | <input type="checkbox"/> 1 Axilla <input type="checkbox"/> 2 Oral <input type="checkbox"/> 3 Anus<br><input type="checkbox"/> 4 Ear <input type="checkbox"/> 5 Unknown <input type="checkbox"/> 6 Other, please describe _____ |
| Respiratory               | [ ] [ ] [ ] times/min                                                      | Pulse              | [ ] [ ] [ ] [ ] times/min                                                                                                                                                                                                      |
| Blood pressure            | [ ] [ ] [ ] [ ] / [ ] [ ] [ ] [ ] mmHg (Systolic/diastolic blood pressure) |                    |                                                                                                                                                                                                                                |

**physical examination**       Unexamined, reason: \_\_\_\_\_

|                       |                                                                                                               |                            |                            |                            |                              |
|-----------------------|---------------------------------------------------------------------------------------------------------------|----------------------------|----------------------------|----------------------------|------------------------------|
| Date                  | [ ] [ ] [ ] [ ]  YEAR  [ ] [ ]  MONTH  [ ] [ ]  DAY                                                           |                            |                            |                            |                              |
| Inspection Part       | Result                                                                                                        |                            |                            |                            | If abnormal, please describe |
|                       | 1= Normal<br>2= Abnormal, no clinical significance<br>3= Abnormal, with clinical significance<br>0=Unexamined |                            |                            |                            |                              |
| General appearance    | <input type="checkbox"/> 1                                                                                    | <input type="checkbox"/> 2 | <input type="checkbox"/> 3 | <input type="checkbox"/> 0 |                              |
| Head                  | <input type="checkbox"/> 1                                                                                    | <input type="checkbox"/> 2 | <input type="checkbox"/> 3 | <input type="checkbox"/> 0 |                              |
| Eyes                  | <input type="checkbox"/> 1                                                                                    | <input type="checkbox"/> 2 | <input type="checkbox"/> 3 | <input type="checkbox"/> 0 |                              |
| Nose                  | <input type="checkbox"/> 1                                                                                    | <input type="checkbox"/> 2 | <input type="checkbox"/> 3 | <input type="checkbox"/> 0 |                              |
| Larynx                | <input type="checkbox"/> 1                                                                                    | <input type="checkbox"/> 2 | <input type="checkbox"/> 3 | <input type="checkbox"/> 0 |                              |
| Neck and thyroid      | <input type="checkbox"/> 1                                                                                    | <input type="checkbox"/> 2 | <input type="checkbox"/> 3 | <input type="checkbox"/> 0 |                              |
| Skin                  | <input type="checkbox"/> 1                                                                                    | <input type="checkbox"/> 2 | <input type="checkbox"/> 3 | <input type="checkbox"/> 0 |                              |
| Cardiovascular system | <input type="checkbox"/> 1                                                                                    | <input type="checkbox"/> 2 | <input type="checkbox"/> 3 | <input type="checkbox"/> 0 |                              |
| Chest and lungs       | <input type="checkbox"/> 1                                                                                    | <input type="checkbox"/> 2 | <input type="checkbox"/> 3 | <input type="checkbox"/> 0 |                              |
| Abdomen               | <input type="checkbox"/> 1                                                                                    | <input type="checkbox"/> 2 | <input type="checkbox"/> 3 | <input type="checkbox"/> 0 |                              |

|                            |                                                                  |
|----------------------------|------------------------------------------------------------------|
| Protocol Number: KY2020-29 | <b>Treatment</b>                                                 |
| Center Number [ ] [ ]      | Subject Screening Number [ ] [ ] [ ] [ ] [ ] [ ] [ ] [ ] [ ] [ ] |
| Visit 5 (D14±1d)           |                                                                  |

|                        |                            |                            |                            |                            |  |
|------------------------|----------------------------|----------------------------|----------------------------|----------------------------|--|
| Nervous system         | <input type="checkbox"/> 1 | <input type="checkbox"/> 2 | <input type="checkbox"/> 3 | <input type="checkbox"/> 0 |  |
| Musculoskeletal system | <input type="checkbox"/> 1 | <input type="checkbox"/> 2 | <input type="checkbox"/> 3 | <input type="checkbox"/> 0 |  |
| Lymphatic system       | <input type="checkbox"/> 1 | <input type="checkbox"/> 2 | <input type="checkbox"/> 3 | <input type="checkbox"/> 0 |  |

**Respiratory symptoms** 0 Unexamined, reason \_\_\_\_\_

Date: [ ] [ ] [ ] [ ] | YEAR | [ ] [ ] | MONTH | [ ] [ ] | DAY

Whether the subject has respiratory symptoms or not: 0 NO 1 NO, please describe: \_\_\_\_\_

Result: 1 Normal 2 Abnormal No clinical significance 3 Abnormal Significant clinically

**Blood Count** 0 Unexamined, reason \_\_\_\_\_

Date: [ ] [ ] [ ] [ ] | YEAR | [ ] [ ] | MONTH | [ ] [ ] | DAY Normal range Number: [ ] [ ] [ ] [ ] [ ] [ ]

| Item                 | Result                                                                                 |      | Result Interpretation      |                                      |                            | Unexamined                 |
|----------------------|----------------------------------------------------------------------------------------|------|----------------------------|--------------------------------------|----------------------------|----------------------------|
|                      | Measured Value                                                                         | Unit | Normal                     | Abnormal<br>No clinical significance | Significant clinically     |                            |
| Red Blood Cell (RBC) | <input type="checkbox"/> 1 10 <sup>12</sup> /L <input type="checkbox"/> 2 Other: _____ |      | <input type="checkbox"/> 1 | <input type="checkbox"/> 2           | <input type="checkbox"/> 3 | <input type="checkbox"/> 0 |
| White Blood Cell     | <input type="checkbox"/> 1 10 <sup>9</sup> /L <input type="checkbox"/> 2 Other: _____  |      | <input type="checkbox"/> 1 | <input type="checkbox"/> 2           | <input type="checkbox"/> 3 | <input type="checkbox"/> 0 |
| Hemoglobin (Hb)      | <input type="checkbox"/> 1 g/L <input type="checkbox"/> 2 Other: _____                 |      | <input type="checkbox"/> 1 | <input type="checkbox"/> 2           | <input type="checkbox"/> 3 | <input type="checkbox"/> 0 |
| Platelet (PLT)       | <input type="checkbox"/> 1 10 <sup>9</sup> /L <input type="checkbox"/> 2 Other: _____  |      | <input type="checkbox"/> 1 | <input type="checkbox"/> 2           | <input type="checkbox"/> 3 | <input type="checkbox"/> 0 |
| Neutrophil (ANC)     | <input type="checkbox"/> 1 10 <sup>9</sup> /L <input type="checkbox"/> 2 Other: _____  |      | <input type="checkbox"/> 1 | <input type="checkbox"/> 2           | <input type="checkbox"/> 3 | <input type="checkbox"/> 0 |
| Lymphocyte (LY)      | <input type="checkbox"/> 1 10 <sup>9</sup> /L <input type="checkbox"/> 2 Other: _____  |      | <input type="checkbox"/> 1 | <input type="checkbox"/> 2           | <input type="checkbox"/> 3 | <input type="checkbox"/> 0 |
| Monocyte (MO)        | <input type="checkbox"/> 1 10 <sup>9</sup> /L <input type="checkbox"/> 2 Other: _____  |      | <input type="checkbox"/> 1 | <input type="checkbox"/> 2           | <input type="checkbox"/> 3 | <input type="checkbox"/> 0 |
| Eosinophil (EO)      | <input type="checkbox"/> 1 10 <sup>9</sup> /L <input type="checkbox"/> 2 Other: _____  |      | <input type="checkbox"/> 1 | <input type="checkbox"/> 2           | <input type="checkbox"/> 3 | <input type="checkbox"/> 0 |
| Basophil (BA)        | <input type="checkbox"/> 1 10 <sup>9</sup> /L <input type="checkbox"/> 2 Other: _____  |      | <input type="checkbox"/> 1 | <input type="checkbox"/> 2           | <input type="checkbox"/> 3 | <input type="checkbox"/> 0 |

**Blood Biochemistry** 0 Unexamined, reason \_\_\_\_\_

Date [ ] [ ] [ ] [ ] | YEAR | [ ] [ ] | MONTH | [ ] [ ] | DAY Normal range Number: [ ] [ ] [ ] [ ] [ ] [ ]

| Item                                   | Result                                                                 |      | Result Interpretation      |                                      |                            | Unexamined                 |
|----------------------------------------|------------------------------------------------------------------------|------|----------------------------|--------------------------------------|----------------------------|----------------------------|
|                                        | Measured Value                                                         | Unit | Normal                     | Abnormal<br>No clinical significance | Significant clinically     |                            |
| Glutamic-pyruvic transaminase (ALT)    | <input type="checkbox"/> 1 U/L <input type="checkbox"/> 2 Other: _____ |      | <input type="checkbox"/> 1 | <input type="checkbox"/> 2           | <input type="checkbox"/> 3 | <input type="checkbox"/> 0 |
| Glutamic-oxalacetic transaminase (AST) | <input type="checkbox"/> 1 U/L <input type="checkbox"/> 2 Other: _____ |      | <input type="checkbox"/> 1 | <input type="checkbox"/> 2           | <input type="checkbox"/> 3 | <input type="checkbox"/> 0 |

|                            |                                                      |                  |  |
|----------------------------|------------------------------------------------------|------------------|--|
| Protocol Number: KY2020-29 |                                                      | <b>Treatment</b> |  |
| Center Number [ ] [ ] [ ]  | Subject Screening Number [ ] [ ] [ ] [ ] [ ] [ ] [ ] | Visit 5 (D14±1d) |  |

|                                   |  |                                                                          |                            |                            |                            |                            |
|-----------------------------------|--|--------------------------------------------------------------------------|----------------------------|----------------------------|----------------------------|----------------------------|
| Total Bilirubin (TBIL)            |  | <input type="checkbox"/> 1 μmol/L <input type="checkbox"/> 2Other: _____ | <input type="checkbox"/> 1 | <input type="checkbox"/> 2 | <input type="checkbox"/> 3 | <input type="checkbox"/> 0 |
| Albumin (ALB)                     |  | <input type="checkbox"/> 1 g/L <input type="checkbox"/> 2Other: _____    | <input type="checkbox"/> 1 | <input type="checkbox"/> 2 | <input type="checkbox"/> 3 | <input type="checkbox"/> 0 |
| γ- glutamyl transpeptidas (GGT)   |  | <input type="checkbox"/> 1 U/L <input type="checkbox"/> 2Other: _____    | <input type="checkbox"/> 1 | <input type="checkbox"/> 2 | <input type="checkbox"/> 3 | <input type="checkbox"/> 0 |
| Lactic dehydrogenase (LDH)        |  | <input type="checkbox"/> 1 U/L <input type="checkbox"/> 2Other: _____    | <input type="checkbox"/> 1 | <input type="checkbox"/> 2 | <input type="checkbox"/> 3 | <input type="checkbox"/> 0 |
| Creatine kinase (CK)              |  | <input type="checkbox"/> 1 U/L <input type="checkbox"/> 2Other: _____    | <input type="checkbox"/> 1 | <input type="checkbox"/> 2 | <input type="checkbox"/> 3 | <input type="checkbox"/> 0 |
| Creatine kinase isoenzyme (CK-MB) |  | <input type="checkbox"/> 1 U/L <input type="checkbox"/> 2Other: _____    | <input type="checkbox"/> 1 | <input type="checkbox"/> 2 | <input type="checkbox"/> 3 | <input type="checkbox"/> 0 |
| Blood urea nitrogen (BUN)         |  | <input type="checkbox"/> 1 mmol/L <input type="checkbox"/> 2Other: _____ | <input type="checkbox"/> 1 | <input type="checkbox"/> 2 | <input type="checkbox"/> 3 | <input type="checkbox"/> 0 |
| Urea (Urea)                       |  | <input type="checkbox"/> 1 mmol/L <input type="checkbox"/> 2Other: _____ | <input type="checkbox"/> 1 | <input type="checkbox"/> 2 | <input type="checkbox"/> 3 | <input type="checkbox"/> 0 |
| Serum creatinine (CR)             |  | <input type="checkbox"/> 1 μmol/L <input type="checkbox"/> 2Other: _____ | <input type="checkbox"/> 1 | <input type="checkbox"/> 2 | <input type="checkbox"/> 3 | <input type="checkbox"/> 0 |

| <b>Urine Test</b> <input type="checkbox"/> 0Unexamined, reason _____ |                |                                                                                  |                            |                                      |                            |                            |
|----------------------------------------------------------------------|----------------|----------------------------------------------------------------------------------|----------------------------|--------------------------------------|----------------------------|----------------------------|
| Date: [ ] [ ] [ ] [ ] YEAR [ ] [ ] MONTH [ ] [ ] DAY                 |                |                                                                                  |                            | Normal range Number: [ ] [ ] [ ] [ ] |                            |                            |
| Item                                                                 | Result         |                                                                                  | Result Interpretation      |                                      | Unexamined                 |                            |
|                                                                      | Measured Value | Unit                                                                             | Normal                     | Abnormal                             |                            |                            |
|                                                                      |                |                                                                                  |                            | No clinical significance             | Significant clinically     |                            |
| Urine Protein                                                        |                | <input type="checkbox"/> 1Not Applicable <input type="checkbox"/> 2Other: _____  | <input type="checkbox"/> 1 | <input type="checkbox"/> 2           | <input type="checkbox"/> 3 | <input type="checkbox"/> 0 |
| Urine Glucose                                                        |                | <input type="checkbox"/> 1 mmol/L <input type="checkbox"/> 2Other: _____         | <input type="checkbox"/> 1 | <input type="checkbox"/> 2           | <input type="checkbox"/> 3 | <input type="checkbox"/> 0 |
| Urine PH value                                                       |                | <input type="checkbox"/> 1 Not Applicable <input type="checkbox"/> 2Other: _____ | <input type="checkbox"/> 1 | <input type="checkbox"/> 2           | <input type="checkbox"/> 3 | <input type="checkbox"/> 0 |
| Urine Erythrocyte                                                    |                | <input type="checkbox"/> 1Not Applicable <input type="checkbox"/> 2Other: _____  | <input type="checkbox"/> 1 | <input type="checkbox"/> 2           | <input type="checkbox"/> 3 | <input type="checkbox"/> 0 |
| Urine Leukocyte                                                      |                | <input type="checkbox"/> 1Not Applicable <input type="checkbox"/> 2Other: _____  | <input type="checkbox"/> 1 | <input type="checkbox"/> 2           | <input type="checkbox"/> 3 | <input type="checkbox"/> 0 |
| Urine Ketone                                                         |                | <input type="checkbox"/> 1Not Applicable <input type="checkbox"/> 2Other: _____  | <input type="checkbox"/> 1 | <input type="checkbox"/> 2           | <input type="checkbox"/> 3 | <input type="checkbox"/> 0 |

| <b>Coagulation Function</b> <input type="checkbox"/> 0Unexamined, reason _____ |                |                                                                     |                            |                                      |                            |                            |
|--------------------------------------------------------------------------------|----------------|---------------------------------------------------------------------|----------------------------|--------------------------------------|----------------------------|----------------------------|
| Date: [ ] [ ] [ ] [ ] YEAR [ ] [ ] MONTH [ ] [ ] DAY                           |                |                                                                     |                            | Normal range Number: [ ] [ ] [ ] [ ] |                            |                            |
| Item                                                                           | Result         |                                                                     | Result Interpretation      |                                      | Unexamined                 |                            |
|                                                                                | Measured Value | Unit                                                                | Normal                     | Abnormal                             |                            |                            |
|                                                                                |                |                                                                     |                            | No clinical significance             | Significant clinically     |                            |
| ProthrombinTime (PT)                                                           |                | <input type="checkbox"/> 1 S <input type="checkbox"/> 2Other: _____ | <input type="checkbox"/> 1 | <input type="checkbox"/> 2           | <input type="checkbox"/> 3 | <input type="checkbox"/> 0 |
| Activated Partial Thromboplastin Time                                          |                | <input type="checkbox"/> 1 S <input type="checkbox"/> 2Other: _____ | <input type="checkbox"/> 1 | <input type="checkbox"/> 2           | <input type="checkbox"/> 3 | <input type="checkbox"/> 0 |







|                            |                  |
|----------------------------|------------------|
| Protocol Number: KY2020-29 | <b>Treatment</b> |
| Center Number [ ] [ ]      | Visit 5 (D14±1d) |

|                                                                                                                                                                          |
|--------------------------------------------------------------------------------------------------------------------------------------------------------------------------|
| <b>Whether develops into severe/critical type</b> <input type="checkbox"/> No <input type="checkbox"/> evaluation<br>Date [ ] [ ] [ ] [ ] YEAR [ ] [ ] MONTH [ ] [ ] DAY |
| Whether develops into severe/critical type: <input type="checkbox"/> NO <input type="checkbox"/> YES                                                                     |
| Date of developing into severe/critical type: [ ] [ ] [ ] [ ] YEAR [ ] [ ] MONTH [ ] [ ] DAY                                                                             |

**If any adverse events have occurred since the last visit, please fill in the “Adverse Events Form”. If there is medication combination, please fill in the “Previous/Combined medication Form”; If there is combined non-drug therapy, please fill in the “Comined Non-Drug Therapy Form”; If there is an out-of-plan inspection, please fill in the “Out-Of-Plan Inspection Form”.**

|                                                     |            |
|-----------------------------------------------------|------------|
| Protocol Number: KY2020-29                          | <b>End</b> |
| Center Number [__] Subject Screening Number [_____] |            |

**End of the Treatment**

Whether the subject finished all the treatment according to the protocol?  NO  YES

End Date: [\_\_][\_\_][\_\_][\_\_]YEAR[\_\_][\_\_]MONTH[\_\_][\_\_]DAY

- If the patient exit ahead of schedule, please choose the most important reason (One-Choice) :
- 1 Disease progression occurred during the study and changes in treatment were required after comprehensive assessment by the investigators.
  - 2 Adverse events lead to an exacerbation of the disease
  - 3 The subject is reluctant to continue using the study drug.
  - 4 Pregnancy
  - 5 Loss to follow-up
  - 6 Death
  - 7 Subject withdraws the Informed Consent
  - 8 Study suspension
  - 9 Other, please describe: \_\_\_\_\_

Notes (Please record other matter which needs additional clarification) :

\_\_\_\_\_

\_\_\_\_\_

\_\_\_\_\_

|                            |                                |
|----------------------------|--------------------------------|
| Protocol Number: KY2020-29 | <b>Extend Follow-Up</b>        |
| Center Number  __          | Subject Screening Number _____ |
| Visit 6 (D21±2d)           |                                |

Type of visit      1 Telephone follow-up    2 Hospital follow-up

**Date of Current Visit:** |\_\_|\_|\_|\_|YEAR|\_\_|\_|MONTH|\_\_|\_|DAY

If the subject has been discharged from the hospital, the following contents may not be carried out, please leave blank; If the subject is not discharged, please conduct the following examinations.

|                                                                        |                                                           |                    |                                                                                                                                                                                                                                 |
|------------------------------------------------------------------------|-----------------------------------------------------------|--------------------|---------------------------------------------------------------------------------------------------------------------------------------------------------------------------------------------------------------------------------|
| <b>Vital Signs</b> <input type="checkbox"/> 0 Unexamined, reason _____ |                                                           |                    |                                                                                                                                                                                                                                 |
| Date                                                                   | __ _ _ _ YEAR __ _ MONTH __ _ DAY                         |                    |                                                                                                                                                                                                                                 |
| Daily maximum temperature                                              | __ _ _ . __ _ °C                                          | Measurement method | <input type="checkbox"/> 1 Axilla <input type="checkbox"/> 2 Oral <input type="checkbox"/> 3 Anus<br><input type="checkbox"/> 4 Ear <input type="checkbox"/> 5 Unknown <input type="checkbox"/> 6 Other , please describe _____ |
| Respiratory                                                            | __ _ _ times/min                                          | Pulse              | __ _ _ times/min                                                                                                                                                                                                                |
| Blood pressure                                                         | __ _ _ / __ _ _  mmHg (Systolic/diastolic blood pressure) |                    |                                                                                                                                                                                                                                 |

|                                                                                  |                                                                                                               |                            |                            |                            |                              |
|----------------------------------------------------------------------------------|---------------------------------------------------------------------------------------------------------------|----------------------------|----------------------------|----------------------------|------------------------------|
| <b>physical examination</b> <input type="checkbox"/> 0 Unexamined, reason: _____ |                                                                                                               |                            |                            |                            |                              |
| Date                                                                             | __ _ _ _ YEAR __ _ MONTH __ _ DAY                                                                             |                            |                            |                            |                              |
| Inspection Part                                                                  | Result                                                                                                        |                            |                            |                            | If abnormal, please describe |
|                                                                                  | 1= Normal<br>2= Abnormal, no clinical significance<br>3= Abnormal, with clinical significance<br>0=Unexamined |                            |                            |                            |                              |
| General appearance                                                               | <input type="checkbox"/> 1                                                                                    | <input type="checkbox"/> 2 | <input type="checkbox"/> 3 | <input type="checkbox"/> 0 |                              |
| Head                                                                             | <input type="checkbox"/> 1                                                                                    | <input type="checkbox"/> 2 | <input type="checkbox"/> 3 | <input type="checkbox"/> 0 |                              |
| Eyes                                                                             | <input type="checkbox"/> 1                                                                                    | <input type="checkbox"/> 2 | <input type="checkbox"/> 3 | <input type="checkbox"/> 0 |                              |
| Nose                                                                             | <input type="checkbox"/> 1                                                                                    | <input type="checkbox"/> 2 | <input type="checkbox"/> 3 | <input type="checkbox"/> 0 |                              |
| Larynx                                                                           | <input type="checkbox"/> 1                                                                                    | <input type="checkbox"/> 2 | <input type="checkbox"/> 3 | <input type="checkbox"/> 0 |                              |
| Neck and thyroid                                                                 | <input type="checkbox"/> 1                                                                                    | <input type="checkbox"/> 2 | <input type="checkbox"/> 3 | <input type="checkbox"/> 0 |                              |
| Skin                                                                             | <input type="checkbox"/> 1                                                                                    | <input type="checkbox"/> 2 | <input type="checkbox"/> 3 | <input type="checkbox"/> 0 |                              |
| Cardiovascular system                                                            | <input type="checkbox"/> 1                                                                                    | <input type="checkbox"/> 2 | <input type="checkbox"/> 3 | <input type="checkbox"/> 0 |                              |



|                            |                                                |
|----------------------------|------------------------------------------------|
| Protocol Number: KY2020-29 | <b>Extend Follow-Up</b>                        |
| Center Number [ ][ ]       | Subject Screening Number [ ][ ][ ][ ][ ][ ][ ] |
| Visit 6 (D21±2d)           |                                                |

|                                        |                                              |                                                    |                                       | e                                     |                                       |                                       |
|----------------------------------------|----------------------------------------------|----------------------------------------------------|---------------------------------------|---------------------------------------|---------------------------------------|---------------------------------------|
| Glutamic-pyruvic transaminase (ALT)    | <input type="checkbox"/> <sub>1</sub> U/L    | <input type="checkbox"/> <sub>2</sub> Other: _____ | <input type="checkbox"/> <sub>1</sub> | <input type="checkbox"/> <sub>2</sub> | <input type="checkbox"/> <sub>3</sub> | <input type="checkbox"/> <sub>0</sub> |
| Glutamic-oxalacetic transaminase (AST) | <input type="checkbox"/> <sub>1</sub> U/L    | <input type="checkbox"/> <sub>2</sub> Other: _____ | <input type="checkbox"/> <sub>1</sub> | <input type="checkbox"/> <sub>2</sub> | <input type="checkbox"/> <sub>3</sub> | <input type="checkbox"/> <sub>0</sub> |
| Total Bilirubin (TBIL)                 | <input type="checkbox"/> <sub>1</sub> µmol/L | <input type="checkbox"/> <sub>2</sub> Other: _____ | <input type="checkbox"/> <sub>1</sub> | <input type="checkbox"/> <sub>2</sub> | <input type="checkbox"/> <sub>3</sub> | <input type="checkbox"/> <sub>0</sub> |
| Albumin (ALB)                          | <input type="checkbox"/> <sub>1</sub> g/L    | <input type="checkbox"/> <sub>2</sub> Other: _____ | <input type="checkbox"/> <sub>1</sub> | <input type="checkbox"/> <sub>2</sub> | <input type="checkbox"/> <sub>3</sub> | <input type="checkbox"/> <sub>0</sub> |
| γ- glutamyl transpeptidase (GGT)       | <input type="checkbox"/> <sub>1</sub> U/L    | <input type="checkbox"/> <sub>2</sub> Other: _____ | <input type="checkbox"/> <sub>1</sub> | <input type="checkbox"/> <sub>2</sub> | <input type="checkbox"/> <sub>3</sub> | <input type="checkbox"/> <sub>0</sub> |
| Lactic dehydrogenase (LDH)             | <input type="checkbox"/> <sub>1</sub> U/L    | <input type="checkbox"/> <sub>2</sub> Other: _____ | <input type="checkbox"/> <sub>1</sub> | <input type="checkbox"/> <sub>2</sub> | <input type="checkbox"/> <sub>3</sub> | <input type="checkbox"/> <sub>0</sub> |
| Creatine kinase (CK)                   | <input type="checkbox"/> <sub>1</sub> U/L    | <input type="checkbox"/> <sub>2</sub> Other: _____ | <input type="checkbox"/> <sub>1</sub> | <input type="checkbox"/> <sub>2</sub> | <input type="checkbox"/> <sub>3</sub> | <input type="checkbox"/> <sub>0</sub> |
| Creatine kinase isoenzyme (CK-MB)      | <input type="checkbox"/> <sub>1</sub> U/L    | <input type="checkbox"/> <sub>2</sub> Other: _____ | <input type="checkbox"/> <sub>1</sub> | <input type="checkbox"/> <sub>2</sub> | <input type="checkbox"/> <sub>3</sub> | <input type="checkbox"/> <sub>0</sub> |
| Blood urea nitrogen (BUN)              | <input type="checkbox"/> <sub>1</sub> mmol/L | <input type="checkbox"/> <sub>2</sub> Other: _____ | <input type="checkbox"/> <sub>1</sub> | <input type="checkbox"/> <sub>2</sub> | <input type="checkbox"/> <sub>3</sub> | <input type="checkbox"/> <sub>0</sub> |
| Urea (Urea)                            | <input type="checkbox"/> <sub>1</sub> mmol/L | <input type="checkbox"/> <sub>2</sub> Other: _____ | <input type="checkbox"/> <sub>1</sub> | <input type="checkbox"/> <sub>2</sub> | <input type="checkbox"/> <sub>3</sub> | <input type="checkbox"/> <sub>0</sub> |
| Serum creatinine (CR)                  | <input type="checkbox"/> <sub>1</sub> µmol/L | <input type="checkbox"/> <sub>2</sub> Other: _____ | <input type="checkbox"/> <sub>1</sub> | <input type="checkbox"/> <sub>2</sub> | <input type="checkbox"/> <sub>3</sub> | <input type="checkbox"/> <sub>0</sub> |

| <b>Urine Test</b> <input type="checkbox"/> <sub>0</sub> Unexamined, reason _____ |                                                      |                                                    |                                       |                                       |                                       |                                       |
|----------------------------------------------------------------------------------|------------------------------------------------------|----------------------------------------------------|---------------------------------------|---------------------------------------|---------------------------------------|---------------------------------------|
| Date: [ ][ ][ ][ ]YEAR [ ][ ]MONTH [ ][ ]DAY                                     |                                                      |                                                    | Normal range Number: [ ][ ][ ][ ]     |                                       |                                       |                                       |
| Item                                                                             | Result                                               |                                                    | Result Interpretation                 |                                       |                                       | Unexamined                            |
|                                                                                  | Measured Value                                       | Unit                                               | Normal                                | Abnormal                              |                                       |                                       |
|                                                                                  |                                                      |                                                    |                                       | No clinical significance              | Significant clinically                |                                       |
| Urine Protein                                                                    | <input type="checkbox"/> <sub>1</sub> Not Applicable | <input type="checkbox"/> <sub>2</sub> Other: _____ | <input type="checkbox"/> <sub>1</sub> | <input type="checkbox"/> <sub>2</sub> | <input type="checkbox"/> <sub>3</sub> | <input type="checkbox"/> <sub>0</sub> |
| Urine Glucose                                                                    | <input type="checkbox"/> <sub>1</sub> mmol/L         | <input type="checkbox"/> <sub>2</sub> Other: _____ | <input type="checkbox"/> <sub>1</sub> | <input type="checkbox"/> <sub>2</sub> | <input type="checkbox"/> <sub>3</sub> | <input type="checkbox"/> <sub>0</sub> |
| Urine PH value                                                                   | <input type="checkbox"/> <sub>1</sub> Not Applicable | <input type="checkbox"/> <sub>2</sub> Other: _____ | <input type="checkbox"/> <sub>1</sub> | <input type="checkbox"/> <sub>2</sub> | <input type="checkbox"/> <sub>3</sub> | <input type="checkbox"/> <sub>0</sub> |
| Urine Erythrocyte                                                                | <input type="checkbox"/> <sub>1</sub> Not Applicable | <input type="checkbox"/> <sub>2</sub> Other: _____ | <input type="checkbox"/> <sub>1</sub> | <input type="checkbox"/> <sub>2</sub> | <input type="checkbox"/> <sub>3</sub> | <input type="checkbox"/> <sub>0</sub> |
| Urine Leukocyte                                                                  | <input type="checkbox"/> <sub>1</sub> Not Applicable | <input type="checkbox"/> <sub>2</sub> Other: _____ | <input type="checkbox"/> <sub>1</sub> | <input type="checkbox"/> <sub>2</sub> | <input type="checkbox"/> <sub>3</sub> | <input type="checkbox"/> <sub>0</sub> |
| Urine Ketone                                                                     | <input type="checkbox"/> <sub>1</sub> Not Applicable | <input type="checkbox"/> <sub>2</sub> Other: _____ | <input type="checkbox"/> <sub>1</sub> | <input type="checkbox"/> <sub>2</sub> | <input type="checkbox"/> <sub>3</sub> | <input type="checkbox"/> <sub>0</sub> |

| <b>Coagulation Function</b> <input type="checkbox"/> <sub>0</sub> Unexamined, reason _____ |          |      |                                   |          |  |            |
|--------------------------------------------------------------------------------------------|----------|------|-----------------------------------|----------|--|------------|
| Date: [ ][ ][ ][ ]YEAR [ ][ ]MONTH [ ][ ]DAY                                               |          |      | Normal range Number: [ ][ ][ ][ ] |          |  |            |
| Item                                                                                       | Result   |      | Result Interpretation             |          |  | Unexamined |
|                                                                                            | Measured | Unit | Normal                            | Abnormal |  |            |
|                                                                                            |          |      |                                   |          |  |            |

|                                    |                                               |
|------------------------------------|-----------------------------------------------|
| Protocol Number: KY2020-29         | <b>Extend Follow-Up</b>                       |
| Center Number <input type="text"/> | Subject Screening Number <input type="text"/> |
| Visit 6 (D21±2d)                   |                                               |

|                                              | Value |                                                                                   | al                         | No clinical significance   | Significant clinically     |                            |
|----------------------------------------------|-------|-----------------------------------------------------------------------------------|----------------------------|----------------------------|----------------------------|----------------------------|
| Prothrombin Time (PT)                        |       | <input type="checkbox"/> 1 S <input type="checkbox"/> 2 Other: _____              | <input type="checkbox"/> 1 | <input type="checkbox"/> 2 | <input type="checkbox"/> 3 | <input type="checkbox"/> 0 |
| Activated Partial Thromboplastin Time (APTT) |       | <input type="checkbox"/> 1 S <input type="checkbox"/> 2 Other: _____              | <input type="checkbox"/> 1 | <input type="checkbox"/> 2 | <input type="checkbox"/> 3 | <input type="checkbox"/> 0 |
| Thrombin Time (TT)                           |       | <input type="checkbox"/> 1 S <input type="checkbox"/> 2 Other: _____              | <input type="checkbox"/> 1 | <input type="checkbox"/> 2 | <input type="checkbox"/> 3 | <input type="checkbox"/> 0 |
| Fibrinogen (Fbg)                             |       | <input type="checkbox"/> 1 g/L <input type="checkbox"/> 2 Other: _____            | <input type="checkbox"/> 1 | <input type="checkbox"/> 2 | <input type="checkbox"/> 3 | <input type="checkbox"/> 0 |
| International Normalized Ratio (INR)         |       | <input type="checkbox"/> 1 Not Applicable <input type="checkbox"/> 2 Other: _____ | <input type="checkbox"/> 1 | <input type="checkbox"/> 2 | <input type="checkbox"/> 3 | <input type="checkbox"/> 0 |

| <b>C-REACTION PROTEIN (CRP)</b> <input type="checkbox"/> 0 Unexamined, reason _____                                                                                                  |                |                                                                         |                            |                            |                            |
|--------------------------------------------------------------------------------------------------------------------------------------------------------------------------------------|----------------|-------------------------------------------------------------------------|----------------------------|----------------------------|----------------------------|
| Date: <input type="text"/>   <input type="text"/>   <input type="text"/>  YEAR  <input type="text"/>   <input type="text"/>  MONTH  <input type="text"/>   <input type="text"/>  DAY |                | Normal range Number: <input type="text"/>                               |                            |                            |                            |
| Item                                                                                                                                                                                 | Result         |                                                                         | Result Interpretation      |                            |                            |
| C-REACTION PROTEIN (CRP)                                                                                                                                                             | Measured Value | Unit                                                                    | Normal                     | Abnormal                   |                            |
|                                                                                                                                                                                      |                |                                                                         |                            | No clinical significance   | Significant clinically     |
|                                                                                                                                                                                      |                | <input type="checkbox"/> 1 mg/L <input type="checkbox"/> 2 Other: _____ | <input type="checkbox"/> 1 | <input type="checkbox"/> 2 | <input type="checkbox"/> 3 |

| <b>Erythrocyte Sedimentation Rate (ESR)</b> <input type="checkbox"/> 0 Unexamined, reason _____                                                                                      |                |                                                                         |                            |                            |                            |
|--------------------------------------------------------------------------------------------------------------------------------------------------------------------------------------|----------------|-------------------------------------------------------------------------|----------------------------|----------------------------|----------------------------|
| Date: <input type="text"/>   <input type="text"/>   <input type="text"/>  YEAR  <input type="text"/>   <input type="text"/>  MONTH  <input type="text"/>   <input type="text"/>  DAY |                | Normal range Number: <input type="text"/>                               |                            |                            |                            |
| Item                                                                                                                                                                                 | Result         |                                                                         | Result Interpretation      |                            |                            |
| Erythrocyte Sedimentation Rate (ESR)                                                                                                                                                 | Measured Value | Unit                                                                    | Normal                     | Abnormal                   |                            |
|                                                                                                                                                                                      |                |                                                                         |                            | No clinical significance   | Significant clinically     |
|                                                                                                                                                                                      |                | <input type="checkbox"/> 1 mm/h <input type="checkbox"/> 2 Other: _____ | <input type="checkbox"/> 1 | <input type="checkbox"/> 2 | <input type="checkbox"/> 3 |

| <b>TNF-α</b> <input type="checkbox"/> 0 Unexamined, reason _____                                                                                                                     |                |                                                                          |                            |                            |                            |
|--------------------------------------------------------------------------------------------------------------------------------------------------------------------------------------|----------------|--------------------------------------------------------------------------|----------------------------|----------------------------|----------------------------|
| Date: <input type="text"/>   <input type="text"/>   <input type="text"/>  YEAR  <input type="text"/>   <input type="text"/>  MONTH  <input type="text"/>   <input type="text"/>  DAY |                | Normal range Number: <input type="text"/>                                |                            |                            |                            |
| Item                                                                                                                                                                                 | Result         |                                                                          | Result Interpretation      |                            |                            |
| TNF-α                                                                                                                                                                                | Measured Value | Unit                                                                     | Normal                     | Abnormal                   |                            |
|                                                                                                                                                                                      |                |                                                                          |                            | No clinical significance   | Significant clinically     |
|                                                                                                                                                                                      |                | <input type="checkbox"/> 1 pg/mL <input type="checkbox"/> 2 Other: _____ | <input type="checkbox"/> 1 | <input type="checkbox"/> 2 | <input type="checkbox"/> 3 |

| <b>IL-6</b> <input type="checkbox"/> 0 Unexamined, reason _____                                                                                                                      |          |                                           |                       |                          |                        |
|--------------------------------------------------------------------------------------------------------------------------------------------------------------------------------------|----------|-------------------------------------------|-----------------------|--------------------------|------------------------|
| Date: <input type="text"/>   <input type="text"/>   <input type="text"/>  YEAR  <input type="text"/>   <input type="text"/>  MONTH  <input type="text"/>   <input type="text"/>  DAY |          | Normal range Number: <input type="text"/> |                       |                          |                        |
| Item                                                                                                                                                                                 | Result   |                                           | Result Interpretation |                          |                        |
|                                                                                                                                                                                      | Measured | Unit                                      | Norm                  | Abnormal                 |                        |
|                                                                                                                                                                                      |          |                                           |                       | No clinical significance | Significant clinically |
|                                                                                                                                                                                      |          |                                           |                       |                          |                        |



|                            |                                                          |
|----------------------------|----------------------------------------------------------|
| Protocol Number: KY2020-29 | <b>Extend Follow-Up</b>                                  |
| Center Number [ ] [ ]      | Subject Screening Number [ ] [ ] [ ] [ ] [ ] [ ] [ ] [ ] |
| Visit 6 (D21±2d)           |                                                          |

| IL-6 | Value |                                  |                                   | al                         | No clinical significance   | Significant clinically     |
|------|-------|----------------------------------|-----------------------------------|----------------------------|----------------------------|----------------------------|
|      |       | <input type="checkbox"/> 1 pg/mL | <input type="checkbox"/> 2 Other: | <input type="checkbox"/> 1 | <input type="checkbox"/> 2 | <input type="checkbox"/> 3 |

**Urine or serum HCG (Only applicable to women of childbearing age)** 0 Unexamined, reason \_\_\_\_\_

1 Not Applicable (Man or woman who isn't able to reproduce)

Date: [ ] [ ] [ ] [ ] | YEAR | [ ] [ ] | MONTH | [ ] [ ] | DAY

Sample: 1 Blood 2 Urine

Result: 1 Negative 2 Positive

**Routine 12 Leads Electrocardiogram** 0 Unexamined, reason \_\_\_\_\_

Date: [ ] [ ] [ ] [ ] | YEAR | [ ] [ ] | MONTH | [ ] [ ] | DAY

Result: 1 Normal 2 Abnormal No clinical significance 3 Abnormal Significant clinically

If "Abnormal", please describe: \_\_\_\_\_

**Chest CT** 0 Unexamined, reason \_\_\_\_\_

Date: [ ] [ ] [ ] [ ] | YEAR | [ ] [ ] | MONTH | [ ] [ ] | DAY

Result: \_\_\_\_\_

Whether chest CT lesion absorbed ≥50% than baseline??

0 NO 1 YES 2 Unidentified 3 Unknown

4 Other, please describe: \_\_\_\_\_

**Nucleic Acid Test of 2019-nCov** 0 Unexamined, reason \_\_\_\_\_

1 Not Applicable

Sampling Part: 1 Upper respiratory tract 2 Lower respiratory tract

Date: [ ] [ ] [ ] [ ] | YEAR | [ ] [ ] | MONTH | [ ] [ ] | DAY      Date: [ ] [ ] : [ ] [ ]

Result : 1 Negative 2 Positive 3 Unidentified 4 Other, please describe \_\_\_\_\_

**Pulse oxygen saturation (without oxygen inhalation )** 0 Unexamined, reason \_\_\_\_\_

|                            |                                         |
|----------------------------|-----------------------------------------|
| Protocol Number: KY2020-29 | <b>Extend Follow-Up</b>                 |
| Center Number  __ __       | Subject Screening Number __ __ __ __ __ |
| Visit 6 (D21±2d)           |                                         |

|                                               |
|-----------------------------------------------|
| Date:  __ __ __ __ YEAR __ __ MONTH __ __ DAY |
| Measured Value: _____% (Rest state)           |

|                                                                                                      |
|------------------------------------------------------------------------------------------------------|
| <b>Whether develops into severe/critical type</b> <input type="checkbox"/> No evaluation             |
| Date __ __ __ __ YEAR __ __ MONTH __ __ DAY                                                          |
| Whether develops into severe/critical type: <input type="checkbox"/> NO <input type="checkbox"/> YES |
| Date of developing into severe/critical type:  __ __ __ __ YEAR __ __ MONTH __ __ DAY                |

**If any adverse events have occurred since the last visit, please fill in the “Adverse Events Form”. If there is medication combination, please fill in the “Previous/Combined medication Form”; If there is combined non-drug therapy, please fill in the “Comined Non-Drug Therapy Form”; If there is an out-of-plan inspection, please fill in the “Out-Of-Plan Inspection Form”.**

|                            |                                |
|----------------------------|--------------------------------|
| Protocol Number: KY2020-29 | <b>Extend Follow-Up</b>        |
| Center Number  __          | Subject Screening Number _____ |
| Visit (D28±2d)             |                                |

|                                                                  |                                                |                                               |
|------------------------------------------------------------------|------------------------------------------------|-----------------------------------------------|
| <b>Type of visit</b>                                             | <input type="checkbox"/> 1 Telephone follow-up | <input type="checkbox"/> 2 Hospital follow-up |
| <b>Date of Current Visit:</b>  __ _ _ _ YEAR __ _ MONTH __ _ DAY |                                                |                                               |

If the subject has been discharged from the hospital, the following contents may not be carried out, please leave blank; If the subject is not discharged, please conduct the following examinations.

|                           |                                                               |                    |                                                                                                                                                                                                                                 |                                                     |
|---------------------------|---------------------------------------------------------------|--------------------|---------------------------------------------------------------------------------------------------------------------------------------------------------------------------------------------------------------------------------|-----------------------------------------------------|
| <b>Vital Signs</b>        |                                                               |                    |                                                                                                                                                                                                                                 | <input type="checkbox"/> 0 Unexamined, reason _____ |
| Date                      | __ _ _ _ YEAR __ _ MONTH __ _ DAY                             |                    |                                                                                                                                                                                                                                 |                                                     |
| Daily maximum temperature | __ _ _ . __ _ °C                                              | Measurement method | <input type="checkbox"/> 1 Axilla <input type="checkbox"/> 2 Oral <input type="checkbox"/> 3 Anus<br><input type="checkbox"/> 4 Ear <input type="checkbox"/> 5 Unknown <input type="checkbox"/> 6 Other , please describe _____ |                                                     |
| Respiratory               | __ _ _ times/min                                              | Pulse              | __ _ _ times/min                                                                                                                                                                                                                |                                                     |
| Blood pressure            | __ _ _ _ / __ _ _ _  mmHg (Systolic/diastolic blood pressure) |                    |                                                                                                                                                                                                                                 |                                                     |

|                             |                                                                                                               |                            |                            |                            |                                                      |
|-----------------------------|---------------------------------------------------------------------------------------------------------------|----------------------------|----------------------------|----------------------------|------------------------------------------------------|
| <b>physical examination</b> |                                                                                                               |                            |                            |                            | <input type="checkbox"/> 0 Unexamined, reason: _____ |
| Date                        | __ _ _ _ YEAR __ _ MONTH __ _ DAY                                                                             |                            |                            |                            |                                                      |
| Inspection Part             | Result                                                                                                        |                            |                            |                            | If abnormal, please describe                         |
|                             | 1= Normal<br>2= Abnormal, no clinical significance<br>3= Abnormal, with clinical significance<br>0=Unexamined |                            |                            |                            |                                                      |
| General appearance          | <input type="checkbox"/> 1                                                                                    | <input type="checkbox"/> 2 | <input type="checkbox"/> 3 | <input type="checkbox"/> 0 |                                                      |
| Head                        | <input type="checkbox"/> 1                                                                                    | <input type="checkbox"/> 2 | <input type="checkbox"/> 3 | <input type="checkbox"/> 0 |                                                      |
| Eyes                        | <input type="checkbox"/> 1                                                                                    | <input type="checkbox"/> 2 | <input type="checkbox"/> 3 | <input type="checkbox"/> 0 |                                                      |
| Nose                        | <input type="checkbox"/> 1                                                                                    | <input type="checkbox"/> 2 | <input type="checkbox"/> 3 | <input type="checkbox"/> 0 |                                                      |
| Larynx                      | <input type="checkbox"/> 1                                                                                    | <input type="checkbox"/> 2 | <input type="checkbox"/> 3 | <input type="checkbox"/> 0 |                                                      |
| Neck and thyroid            | <input type="checkbox"/> 1                                                                                    | <input type="checkbox"/> 2 | <input type="checkbox"/> 3 | <input type="checkbox"/> 0 |                                                      |
| Skin                        | <input type="checkbox"/> 1                                                                                    | <input type="checkbox"/> 2 | <input type="checkbox"/> 3 | <input type="checkbox"/> 0 |                                                      |

|                            |                                                |
|----------------------------|------------------------------------------------|
| Protocol Number: KY2020-29 | <b>Extend Follow-Up</b>                        |
| Center Number  __          | Subject Screening Number _____  Visit (D28±2d) |

|                        |                            |                            |                            |                            |  |
|------------------------|----------------------------|----------------------------|----------------------------|----------------------------|--|
| Cardiovascular system  | <input type="checkbox"/> 1 | <input type="checkbox"/> 2 | <input type="checkbox"/> 3 | <input type="checkbox"/> 0 |  |
| Chest and lungs        | <input type="checkbox"/> 1 | <input type="checkbox"/> 2 | <input type="checkbox"/> 3 | <input type="checkbox"/> 0 |  |
| Abdomen                | <input type="checkbox"/> 1 | <input type="checkbox"/> 2 | <input type="checkbox"/> 3 | <input type="checkbox"/> 0 |  |
| Nervous system         | <input type="checkbox"/> 1 | <input type="checkbox"/> 2 | <input type="checkbox"/> 3 | <input type="checkbox"/> 0 |  |
| Musculoskeletal system | <input type="checkbox"/> 1 | <input type="checkbox"/> 2 | <input type="checkbox"/> 3 | <input type="checkbox"/> 0 |  |
| Lymphatic system       | <input type="checkbox"/> 1 | <input type="checkbox"/> 2 | <input type="checkbox"/> 3 | <input type="checkbox"/> 0 |  |

|                                                                                                                                                                 |
|-----------------------------------------------------------------------------------------------------------------------------------------------------------------|
| <b>Respiratory symptoms</b> <input type="checkbox"/> 0 Unexamined, reason _____                                                                                 |
| Date:  __ _ __ _ YEAR __ _ __ _ MONTH __ _ __ _ DAY                                                                                                             |
| Whether the subject has respiratory symptoms or not: <input type="checkbox"/> 0 NO <input type="checkbox"/> 1 NO, please describe: _____                        |
| Result: <input type="checkbox"/> 1 Normal <input type="checkbox"/> 2 AbnormalNo clinical significance <input type="checkbox"/> 3 AbnormalSignificant clinically |

| <b>Blood Count</b> <input type="checkbox"/> 0 Unexamined, reason _____                 |                                                                                        |      |                            |                            |                            |                            |
|----------------------------------------------------------------------------------------|----------------------------------------------------------------------------------------|------|----------------------------|----------------------------|----------------------------|----------------------------|
| Date:  __ _ __ _ YEAR __ _ __ _ MONTH __ _ __ _ DAY    Normal range Number:  __ _ __ _ |                                                                                        |      |                            |                            |                            |                            |
| Item                                                                                   | Result                                                                                 |      | Result Interpretation      |                            |                            | Unexamined                 |
|                                                                                        | Measured Value                                                                         | Unit | Normal                     | No clinical significance   | Significant clinically     |                            |
| Red Blood Cell (RBC)                                                                   | <input type="checkbox"/> 1 10 <sup>12</sup> /L <input type="checkbox"/> 2 Other: _____ |      | <input type="checkbox"/> 1 | <input type="checkbox"/> 2 | <input type="checkbox"/> 3 | <input type="checkbox"/> 0 |
| White Blood Cell                                                                       | <input type="checkbox"/> 1 10 <sup>9</sup> /L <input type="checkbox"/> 2 Other: _____  |      | <input type="checkbox"/> 1 | <input type="checkbox"/> 2 | <input type="checkbox"/> 3 | <input type="checkbox"/> 0 |
| Hemoglobin (Hb)                                                                        | <input type="checkbox"/> 1 g/L <input type="checkbox"/> 2 Other: _____                 |      | <input type="checkbox"/> 1 | <input type="checkbox"/> 2 | <input type="checkbox"/> 3 | <input type="checkbox"/> 0 |
| Platelet (PLT)                                                                         | <input type="checkbox"/> 1 10 <sup>9</sup> /L <input type="checkbox"/> 2 Other: _____  |      | <input type="checkbox"/> 1 | <input type="checkbox"/> 2 | <input type="checkbox"/> 3 | <input type="checkbox"/> 0 |
| Neutrophil (ANC)                                                                       | <input type="checkbox"/> 1 10 <sup>9</sup> /L <input type="checkbox"/> 2 Other: _____  |      | <input type="checkbox"/> 1 | <input type="checkbox"/> 2 | <input type="checkbox"/> 3 | <input type="checkbox"/> 0 |
| Lymphocyte (LY)                                                                        | <input type="checkbox"/> 1 10 <sup>9</sup> /L <input type="checkbox"/> 2 Other: _____  |      | <input type="checkbox"/> 1 | <input type="checkbox"/> 2 | <input type="checkbox"/> 3 | <input type="checkbox"/> 0 |
| Monocyte (MO)                                                                          | <input type="checkbox"/> 1 10 <sup>9</sup> /L <input type="checkbox"/> 2 Other: _____  |      | <input type="checkbox"/> 1 | <input type="checkbox"/> 2 | <input type="checkbox"/> 3 | <input type="checkbox"/> 0 |
| Eosinophil (EO)                                                                        | <input type="checkbox"/> 1 10 <sup>9</sup> /L <input type="checkbox"/> 2 Other: _____  |      | <input type="checkbox"/> 1 | <input type="checkbox"/> 2 | <input type="checkbox"/> 3 | <input type="checkbox"/> 0 |
| Basophil (BA)                                                                          | <input type="checkbox"/> 1 10 <sup>9</sup> /L <input type="checkbox"/> 2 Other: _____  |      | <input type="checkbox"/> 1 | <input type="checkbox"/> 2 | <input type="checkbox"/> 3 | <input type="checkbox"/> 0 |

| <b>Blood Biochemistry</b> <input type="checkbox"/> 0 Unexamined, reason _____        |        |                       |       |
|--------------------------------------------------------------------------------------|--------|-----------------------|-------|
| Date __ _ __ _ YEAR __ _ __ _ MONTH __ _ __ _ DAY    Normal range Number:  __ _ __ _ |        |                       |       |
| Item                                                                                 | Result | Result Interpretation | Unexa |

|                            |                                                          |                         |
|----------------------------|----------------------------------------------------------|-------------------------|
| Protocol Number: KY2020-29 |                                                          | <b>Extend Follow-Up</b> |
| Center Number [ ] [ ] [ ]  | Subject Screening Number [ ] [ ] [ ] [ ] [ ] [ ] [ ] [ ] | Visit (D28±2d)          |

|                                        | Measured Value | Unit                                                                                            | Normal                                | Abnormal                              |                                       | Unexamined                            |
|----------------------------------------|----------------|-------------------------------------------------------------------------------------------------|---------------------------------------|---------------------------------------|---------------------------------------|---------------------------------------|
|                                        |                |                                                                                                 |                                       | No clinical significance              | Significant clinically                |                                       |
| Glutamic-pyruvic transaminase (ALT)    |                | <input type="checkbox"/> <sub>1</sub> U/L <input type="checkbox"/> <sub>2</sub> Other: _____    | <input type="checkbox"/> <sub>1</sub> | <input type="checkbox"/> <sub>2</sub> | <input type="checkbox"/> <sub>3</sub> | <input type="checkbox"/> <sub>0</sub> |
| Glutamic-oxalacetic transaminase (AST) |                | <input type="checkbox"/> <sub>1</sub> U/L <input type="checkbox"/> <sub>2</sub> Other: _____    | <input type="checkbox"/> <sub>1</sub> | <input type="checkbox"/> <sub>2</sub> | <input type="checkbox"/> <sub>3</sub> | <input type="checkbox"/> <sub>0</sub> |
| Total Bilirubin (TBIL)                 |                | <input type="checkbox"/> <sub>1</sub> µmol/L <input type="checkbox"/> <sub>2</sub> Other: _____ | <input type="checkbox"/> <sub>1</sub> | <input type="checkbox"/> <sub>2</sub> | <input type="checkbox"/> <sub>3</sub> | <input type="checkbox"/> <sub>0</sub> |
| Albumin (ALB)                          |                | <input type="checkbox"/> <sub>1</sub> g/L <input type="checkbox"/> <sub>2</sub> Other: _____    | <input type="checkbox"/> <sub>1</sub> | <input type="checkbox"/> <sub>2</sub> | <input type="checkbox"/> <sub>3</sub> | <input type="checkbox"/> <sub>0</sub> |
| γ- glutamyl transpeptidase (GGT)       |                | <input type="checkbox"/> <sub>1</sub> U/L <input type="checkbox"/> <sub>2</sub> Other: _____    | <input type="checkbox"/> <sub>1</sub> | <input type="checkbox"/> <sub>2</sub> | <input type="checkbox"/> <sub>3</sub> | <input type="checkbox"/> <sub>0</sub> |
| Lactic dehydrogenase (LDH)             |                | <input type="checkbox"/> <sub>1</sub> U/L <input type="checkbox"/> <sub>2</sub> Other: _____    | <input type="checkbox"/> <sub>1</sub> | <input type="checkbox"/> <sub>2</sub> | <input type="checkbox"/> <sub>3</sub> | <input type="checkbox"/> <sub>0</sub> |
| Creatine kinase (CK)                   |                | <input type="checkbox"/> <sub>1</sub> U/L <input type="checkbox"/> <sub>2</sub> Other: _____    | <input type="checkbox"/> <sub>1</sub> | <input type="checkbox"/> <sub>2</sub> | <input type="checkbox"/> <sub>3</sub> | <input type="checkbox"/> <sub>0</sub> |
| Creatine kinase isoenzyme (CK-MB)      |                | <input type="checkbox"/> <sub>1</sub> U/L <input type="checkbox"/> <sub>2</sub> Other: _____    | <input type="checkbox"/> <sub>1</sub> | <input type="checkbox"/> <sub>2</sub> | <input type="checkbox"/> <sub>3</sub> | <input type="checkbox"/> <sub>0</sub> |
| Blood urea nitrogen (BUN)              |                | <input type="checkbox"/> <sub>1</sub> mmol/L <input type="checkbox"/> <sub>2</sub> Other: _____ | <input type="checkbox"/> <sub>1</sub> | <input type="checkbox"/> <sub>2</sub> | <input type="checkbox"/> <sub>3</sub> | <input type="checkbox"/> <sub>0</sub> |
| Urea (Urea)                            |                | <input type="checkbox"/> <sub>1</sub> mmol/L <input type="checkbox"/> <sub>2</sub> Other: _____ | <input type="checkbox"/> <sub>1</sub> | <input type="checkbox"/> <sub>2</sub> | <input type="checkbox"/> <sub>3</sub> | <input type="checkbox"/> <sub>0</sub> |
| Serum creatinine (CR)                  |                | <input type="checkbox"/> <sub>1</sub> µmol/L <input type="checkbox"/> <sub>2</sub> Other: _____ | <input type="checkbox"/> <sub>1</sub> | <input type="checkbox"/> <sub>2</sub> | <input type="checkbox"/> <sub>3</sub> | <input type="checkbox"/> <sub>0</sub> |

| <b>Urine Test</b> <input type="checkbox"/> <sub>0</sub> Unexamined, reason _____                    |                |                                                                                                         |                                       |                                       |                                       |                                       |
|-----------------------------------------------------------------------------------------------------|----------------|---------------------------------------------------------------------------------------------------------|---------------------------------------|---------------------------------------|---------------------------------------|---------------------------------------|
| Date: [ ] [ ] [ ] [ ]  YEAR  [ ] [ ]  MONTH  [ ] [ ]  DAY      Normal range Number: [ ] [ ] [ ] [ ] |                |                                                                                                         |                                       |                                       |                                       |                                       |
| Item                                                                                                | Result         |                                                                                                         | Result Interpretation                 |                                       |                                       | Unexamined                            |
|                                                                                                     | Measured Value | Unit                                                                                                    | Normal                                | Abnormal                              |                                       |                                       |
|                                                                                                     |                |                                                                                                         |                                       | No clinical significance              | Significant clinically                |                                       |
| Urine Protein                                                                                       |                | <input type="checkbox"/> <sub>1</sub> Not Applicable <input type="checkbox"/> <sub>2</sub> Other: _____ | <input type="checkbox"/> <sub>1</sub> | <input type="checkbox"/> <sub>2</sub> | <input type="checkbox"/> <sub>3</sub> | <input type="checkbox"/> <sub>0</sub> |
| Urine Glucose                                                                                       |                | <input type="checkbox"/> <sub>1</sub> mmol/L <input type="checkbox"/> <sub>2</sub> Other: _____         | <input type="checkbox"/> <sub>1</sub> | <input type="checkbox"/> <sub>2</sub> | <input type="checkbox"/> <sub>3</sub> | <input type="checkbox"/> <sub>0</sub> |
| Urine PH value                                                                                      |                | <input type="checkbox"/> <sub>1</sub> Not Applicable <input type="checkbox"/> <sub>2</sub> Other: _____ | <input type="checkbox"/> <sub>1</sub> | <input type="checkbox"/> <sub>2</sub> | <input type="checkbox"/> <sub>3</sub> | <input type="checkbox"/> <sub>0</sub> |
| Urine Erythrocyte                                                                                   |                | <input type="checkbox"/> <sub>1</sub> Not Applicable <input type="checkbox"/> <sub>2</sub> Other: _____ | <input type="checkbox"/> <sub>1</sub> | <input type="checkbox"/> <sub>2</sub> | <input type="checkbox"/> <sub>3</sub> | <input type="checkbox"/> <sub>0</sub> |
| Urine Leukocyte                                                                                     |                | <input type="checkbox"/> <sub>1</sub> Not Applicable <input type="checkbox"/> <sub>2</sub> Other: _____ | <input type="checkbox"/> <sub>1</sub> | <input type="checkbox"/> <sub>2</sub> | <input type="checkbox"/> <sub>3</sub> | <input type="checkbox"/> <sub>0</sub> |
| Urine Ketone                                                                                        |                | <input type="checkbox"/> <sub>1</sub> Not Applicable <input type="checkbox"/> <sub>2</sub> Other: _____ | <input type="checkbox"/> <sub>1</sub> | <input type="checkbox"/> <sub>2</sub> | <input type="checkbox"/> <sub>3</sub> | <input type="checkbox"/> <sub>0</sub> |

|                                                                                                     |  |  |  |  |  |  |
|-----------------------------------------------------------------------------------------------------|--|--|--|--|--|--|
| <b>Coagulation Function</b> <input type="checkbox"/> <sub>0</sub> Unexamined, reason _____          |  |  |  |  |  |  |
| Date: [ ] [ ] [ ] [ ]  YEAR  [ ] [ ]  MONTH  [ ] [ ]  DAY      Normal range Number: [ ] [ ] [ ] [ ] |  |  |  |  |  |  |





|                            |                                |
|----------------------------|--------------------------------|
| Protocol Number: KY2020-29 | <b>Extend Follow-Up</b>        |
| Center Number  __          | Subject Screening Number _____ |
| Visit (D28±2d)             |                                |

|                                                                                                                                                                                                                                                                |
|----------------------------------------------------------------------------------------------------------------------------------------------------------------------------------------------------------------------------------------------------------------|
| Wheather chest CT lesion absorbed≥50% than baseline?? <input type="checkbox"/> _0 NO <input type="checkbox"/> _1 YES <input type="checkbox"/> _2 Unidentified<br><input type="checkbox"/> _3 Unknown <input type="checkbox"/> _4 Other, please describe: _____ |
|----------------------------------------------------------------------------------------------------------------------------------------------------------------------------------------------------------------------------------------------------------------|

|                                                                                                                                  |
|----------------------------------------------------------------------------------------------------------------------------------|
| <b>Whether develops into severe/critical type</b> <input type="checkbox"/> _0 No evaluation<br>Date _ _ _ YEAR _ _ MONTH _ _ DAY |
| Whether develops into severe/critical type: <input type="checkbox"/> _0 NO <input type="checkbox"/> _1 YES                       |
| Date of developing into severe/critical type:  _ _ _ _ YEAR _ _ MONTH _ _ DAY                                                    |

**If any adverse events have occurred since the last visit, please fill in the “Adverse Events Form”. If there is medication combination, please fill in the “Previous/Combined medication Form”; If there is combined non-drug therapy, please fill in the “Comined Non-Drug Therapy Form”; If there is an out-of-plan inspection, please fill in the “Out-Of-Plan Inspection Form”.**



| Does the subject use the drug studied? <input type="checkbox"/> 0 NO <input type="checkbox"/> 1 YES <input type="checkbox"/> 2 Not applicable (Control Group)                                                                                                                 |                                                                 |                                     |                           |                          |                |                |                                                                                    |                                                               |
|-------------------------------------------------------------------------------------------------------------------------------------------------------------------------------------------------------------------------------------------------------------------------------|-----------------------------------------------------------------|-------------------------------------|---------------------------|--------------------------|----------------|----------------|------------------------------------------------------------------------------------|---------------------------------------------------------------|
| <b>Situation of Drug Usage</b>                                                                                                                                                                                                                                                |                                                                 |                                     |                           |                          |                |                |                                                                                    |                                                               |
| Days of taking the drug                                                                                                                                                                                                                                                       | Whether use the drug                                            | Usage Date                          | Planned daily dosage (mg) | Actual daily dosage (mg) | Frequency (1)  | Delivery (2)   | State the reason in case of dose adjustment or suspension                          | Please explain in case of missed, overdose or other situation |
| Day__                                                                                                                                                                                                                                                                         | <input type="checkbox"/> 0 NO<br><input type="checkbox"/> 1 YES | ____ YEAR<br>____ MONTH<br>____ DAY | _____                     | _____                    | _____<br>_____ | _____<br>_____ | <input type="checkbox"/> 1 AE, Number__<br><input type="checkbox"/> 2 Other, _____ |                                                               |
| Day__                                                                                                                                                                                                                                                                         | <input type="checkbox"/> 0 NO<br><input type="checkbox"/> 1 YES | ____ YEAR<br>____ MONTH<br>____ DAY | _____                     | _____                    | _____<br>_____ | _____<br>_____ | <input type="checkbox"/> 1 AE, Number__<br><input type="checkbox"/> 2 Other, _____ |                                                               |
| Day__                                                                                                                                                                                                                                                                         | <input type="checkbox"/> 0 NO<br><input type="checkbox"/> 1 YES | ____ YEAR<br>____ MONTH<br>____ DAY | _____                     | _____                    | _____<br>_____ | _____<br>_____ | <input type="checkbox"/> 1 AE, Number__<br><input type="checkbox"/> 2 Other, _____ |                                                               |
| Day__                                                                                                                                                                                                                                                                         | <input type="checkbox"/> 0 NO<br><input type="checkbox"/> 1 YES | ____ YEAR<br>____ MONTH<br>____ DAY | _____                     | _____                    | _____<br>_____ | _____<br>_____ | <input type="checkbox"/> 1 AE, Number__<br><input type="checkbox"/> 2 Other, _____ |                                                               |
| Day__                                                                                                                                                                                                                                                                         | <input type="checkbox"/> 0 NO<br><input type="checkbox"/> 1 YES | ____ YEAR<br>____ MONTH<br>____ DAY | _____                     | _____                    | _____<br>_____ | _____<br>_____ | <input type="checkbox"/> 1 AE, Number__<br><input type="checkbox"/> 2 Other, _____ |                                                               |
| <b>(1) Frequency: 1= three times a day 2= twice a day 3= once a day 4= unknown 5= others, please specify in the line</b><br><b>(2) Delivery: 1= not applicable 2= dose adjustment 3= missed 4= overdose 5= suspended administration 6= others, please specify in the line</b> |                                                                 |                                     |                           |                          |                |                |                                                                                    |                                                               |

| Does the subject use the drug studied? <input type="checkbox"/> 0 NO <input type="checkbox"/> 1 YES <input type="checkbox"/> 2 Not applicable (Control Group) |                                                                 |                                     |                           |                          |               |               |                                                                                   |                                                               |
|---------------------------------------------------------------------------------------------------------------------------------------------------------------|-----------------------------------------------------------------|-------------------------------------|---------------------------|--------------------------|---------------|---------------|-----------------------------------------------------------------------------------|---------------------------------------------------------------|
| Situation of Drug Usage                                                                                                                                       |                                                                 |                                     |                           |                          |               |               |                                                                                   |                                                               |
| Days of taking the drug                                                                                                                                       | Whether use the drug                                            | Usage Date                          | Planned daily dosage (mg) | Actual daily dosage (mg) | Frequency (1) | Delivery (2)  | State the reason in case of dose adjustment or suspension                         | Please explain in case of missed, overdose or other situation |
| Day__                                                                                                                                                         | <input type="checkbox"/> 0 NO<br><input type="checkbox"/> 1 YES | ____ YEAR<br>____ MONTH<br>____ DAY | _____                     | _____                    | ____<br>_____ | ____<br>_____ | <input type="checkbox"/> 1 AE, Number__<br><input type="checkbox"/> 2 Other, ____ |                                                               |
| Day__                                                                                                                                                         | <input type="checkbox"/> 0 NO<br><input type="checkbox"/> 1 YES | ____ YEAR<br>____ MONTH<br>____ DAY | _____                     | _____                    | ____<br>_____ | ____<br>_____ | <input type="checkbox"/> 1 AE, Number__<br><input type="checkbox"/> 2 Other, ____ |                                                               |
| Day__                                                                                                                                                         | <input type="checkbox"/> 0 NO<br><input type="checkbox"/> 1 YES | ____ YEAR<br>____ MONTH<br>____ DAY | _____                     | _____                    | ____<br>_____ | ____<br>_____ | <input type="checkbox"/> 1 AE, Number__<br><input type="checkbox"/> 2 Other, ____ |                                                               |
| Day__                                                                                                                                                         | <input type="checkbox"/> 0 NO<br><input type="checkbox"/> 1 YES | ____ YEAR<br>____ MONTH<br>____ DAY | _____                     | _____                    | ____<br>_____ | ____<br>_____ | <input type="checkbox"/> 1 AE, Number__<br><input type="checkbox"/> 2 Other, ____ |                                                               |
| Day__                                                                                                                                                         | <input type="checkbox"/> 0 NO<br><input type="checkbox"/> 1 YES | ____ YEAR<br>____ MONTH<br>____ DAY | _____                     | _____                    | ____<br>_____ | ____<br>_____ | <input type="checkbox"/> 1 AE, Number__<br><input type="checkbox"/> 2 Other, ____ |                                                               |

(1) Frequency: 1= three times a day 2= twice a day 3= once a day 4= unknown 5= others, please specify in the line  
 (2) Delivery: 1= not applicable 2= dose adjustment 3= missed 4= overdose 5= suspended administration 6= others, please specify in the line

Did the subject experience any adverse event?  NO  YES, please fill in refer to the code at the bottom of the form

**Adverse Events?**

| NO. | Adverse Event | Date Of beginning                          | Sustained at the end of the study? |                                        | CTCAE Level (1) | Taken Measurements                   |                       | Relationship with the study | AE Outcome (5) | SAE or Not?              |                                |
|-----|---------------|--------------------------------------------|------------------------------------|----------------------------------------|-----------------|--------------------------------------|-----------------------|-----------------------------|----------------|--------------------------|--------------------------------|
|     |               |                                            | YES                                | NO→Date of End                         |                 | Measurement for the studied drug (2) | Other measurement (3) |                             |                | No                       | YES, the specific SAE type (6) |
| 1   |               | _ _ _ _ Y<br>EAR _ _ MO<br>NTH _ _ DA<br>Y | <input type="checkbox"/>           | _ _ _ _ YEA<br>R _ _ MONTH <br>_ _ DAY | _               | _ <br>_____                          | _ <br>_____           | _ <br>_                     | _              | <input type="checkbox"/> | _                              |
| 2   |               | _ _ _ _ Y<br>EAR _ _ MO<br>NTH _ _ DA<br>Y | <input type="checkbox"/>           | _ _ _ _ YEA<br>R _ _ MONTH <br>_ _ DAY | _               | _ <br>_____                          | _ <br>_____           | _ <br>_                     | _              | <input type="checkbox"/> | _                              |
| 3   |               | _ _ _ _ Y<br>EAR _ _ MO<br>NTH _ _ DA<br>Y | <input type="checkbox"/>           | _ _ _ _ YEA<br>R _ _ MONTH <br>_ _ DAY | _               | _ <br>_____                          | _ <br>_____           | _ <br>_                     | _              | <input type="checkbox"/> | _                              |
| 4   |               | _ _ _ _ Y<br>EAR _ _ MO<br>NTH _ _ DA<br>Y | <input type="checkbox"/>           | _ _ _ _ YEA<br>R _ _ MONTH <br>_ _ DAY | _               | _ <br>_____                          | _ <br>_____           | _ <br>_                     | _              | <input type="checkbox"/> | _                              |

| <b>(1)<br/>CTCAE<br/>Level</b>                                | <b>(2) Measurement for the<br/>studied drug</b>                                                                                                             |                                                                                                                                                                                                              | <b>(3) Other<br/>measurements</b>                                                                                                                                               | <b>( 4 ) Relationship<br/>with the studied<br/>drug</b>                                                                                    | <b>(5) AE outcome</b>                                                                                                                                                                                                                                          | <b>(6) Specific SAE type</b> |
|---------------------------------------------------------------|-------------------------------------------------------------------------------------------------------------------------------------------------------------|--------------------------------------------------------------------------------------------------------------------------------------------------------------------------------------------------------------|---------------------------------------------------------------------------------------------------------------------------------------------------------------------------------|--------------------------------------------------------------------------------------------------------------------------------------------|----------------------------------------------------------------------------------------------------------------------------------------------------------------------------------------------------------------------------------------------------------------|------------------------------|
| 1=level 1<br>2=level 2<br>3=level 3<br>4=level 4<br>5=level 5 | 1=Maintenance of current<br>treatment<br>2=Suspension<br>3=Termination<br>4=Reduce the dose<br>5=Not applicable<br>6= Others, please specify<br>in the line | 1= No<br>2= Combined medication, fill in the<br>Combined Medication Form<br>3= Combined with non-drug<br>therapy, fill in the Combined non-<br>drug therapy Form<br>4= Others, please specify in the<br>line | 1=Certainly related<br>2=Probably related<br>3=Possibly related<br>4= Possibly non-related<br>5= Certainly non- related<br>6= Remain to be<br>evaluated<br>7=Unable to evaluate | 1 = unchanged<br>2=deterioration<br>3= recovery/healing<br>4=improvement/recovery<br>5= recovery with sequelae<br>6 = death<br>7 = unknown | 1= life threatening<br>2= cause death<br>3= require hospitalization or extend the<br>current stay<br>4= cause permanent or significant<br>disability or dysfunction<br>5= causes congenital malformation/birth<br>defects<br>6= other important medical events |                              |

|                                                                    |                                     |
|--------------------------------------------------------------------|-------------------------------------|
| Protocol Number: KY2020-29                                         | <b>Previous/Combined Medication</b> |
| Center Number: <input style="width: 40px;" type="text"/>           |                                     |
| Subject Screening Number <input style="width: 80px;" type="text"/> |                                     |

**Does the subject have previous/combined medication?**  
 **NO**                       **YES, please fill in the form below refer to the code at the bottom of the table.**

**Previous/Combined medication**

| NO. | Drug Name<br>(generic name) | Indications<br>(1)                        | Indications<br>Notes | single<br>dose | Dose Unit<br>(2)                          | Dosing frequency<br>(3)                   | administration<br>route<br>(4)            | Date of beginning              | Sustain at the end of the study? |                                 |
|-----|-----------------------------|-------------------------------------------|----------------------|----------------|-------------------------------------------|-------------------------------------------|-------------------------------------------|--------------------------------|----------------------------------|---------------------------------|
|     |                             |                                           |                      |                |                                           |                                           |                                           |                                | Yes                              | NO→Date of end                  |
| 1   |                             | <input style="width: 30px;" type="text"/> |                      |                | <input style="width: 30px;" type="text"/> | <input style="width: 30px;" type="text"/> | <input style="width: 30px;" type="text"/> | _____ YEAR __<br> MONTH __ DAY | <input type="checkbox"/>         | _____ YEAR __<br>_ MONTH __ DAY |
| 2   |                             | <input style="width: 30px;" type="text"/> |                      |                | <input style="width: 30px;" type="text"/> | <input style="width: 30px;" type="text"/> | <input style="width: 30px;" type="text"/> | _____ YEAR __<br> MONTH __ DAY | <input type="checkbox"/>         | _____ YEAR __<br>_ MONTH __ DAY |
| 3   |                             | <input style="width: 30px;" type="text"/> |                      |                | <input style="width: 30px;" type="text"/> | <input style="width: 30px;" type="text"/> | <input style="width: 30px;" type="text"/> | _____ YEAR __<br> MONTH __ DAY | <input type="checkbox"/>         | _____ YEAR __<br>_ MONTH __ DAY |
| 4   |                             | <input style="width: 30px;" type="text"/> |                      |                | <input style="width: 30px;" type="text"/> | <input style="width: 30px;" type="text"/> | <input style="width: 30px;" type="text"/> | _____ YEAR __<br> MONTH __ DAY | <input type="checkbox"/>         | _____ YEAR __<br>_ MONTH __ DAY |
| 5   |                             | <input style="width: 30px;" type="text"/> |                      |                | <input style="width: 30px;" type="text"/> | <input style="width: 30px;" type="text"/> | <input style="width: 30px;" type="text"/> | _____ YEAR __<br> MONTH __ DAY | <input type="checkbox"/>         | _____ YEAR __<br>_ MONTH __ DAY |

| (1) Indications                                                                                                                                                                     | (2) dosage Unit                                                                                                                                                                                                           | (3) Dosing frequency                                                                                                                                                                                                     | (4) administration route                                                                                                                                                                                                                                                           |
|-------------------------------------------------------------------------------------------------------------------------------------------------------------------------------------|---------------------------------------------------------------------------------------------------------------------------------------------------------------------------------------------------------------------------|--------------------------------------------------------------------------------------------------------------------------------------------------------------------------------------------------------------------------|------------------------------------------------------------------------------------------------------------------------------------------------------------------------------------------------------------------------------------------------------------------------------------|
| 1=Disease studied in this study<br>2= Previous history (please fill in the history number in the Notes)<br>3= Adverse events (please fill in the number of adverse events in Notes) | 1 = micrograms (µg)    6=Unit(U)<br>2 = milligram (mg)    7=Tablet(Tab)<br>3 = gram (g)            8=capsule (Cap)<br>4 = milliliter (mL)    9=Unknown<br>5 = International Unit (IU)    10=Other,please fill in the line | 1= Once a day (qd)    6=Once a week (qw)<br>2= Twice a day (bid)    7=Before sleep(hs)<br>3= Three times a day (tid)    8=As required (prn)<br>4= Four                    9=Unknown<br>10=Other, please fill in the line | 1=oral (PO)              7= Local (skin) (TOP)<br>2= intravenous        8= ophthalmus(OPH)<br>drop(IVgtt)            9=Inhalation(INH)<br>3=Intravenous        10=Unknown<br>injection(IV)           11= Other, please fill in the line<br>4=Intramuscular (IM)<br>5= Subcutaneous |

|                                     |                                               |                                     |
|-------------------------------------|-----------------------------------------------|-------------------------------------|
| Protocol Number: KY2020-29          |                                               | <b>Previous/Combined Medication</b> |
| Center Number: <input type="text"/> | Subject Screening Number <input type="text"/> |                                     |

|                                        |  |                                                                |                            |
|----------------------------------------|--|----------------------------------------------------------------|----------------------------|
| 4=Other (please describe in the Notes) |  | times a day<br>(qid)<br>5= once<br>every other<br>day<br>(qod) | (SQ)<br>6= sublingual (SL) |
|----------------------------------------|--|----------------------------------------------------------------|----------------------------|

|                            |                                                          |                                     |
|----------------------------|----------------------------------------------------------|-------------------------------------|
| Protocol Number: KY2020-29 |                                                          | <b>Previous/Combined Medication</b> |
| Center Number [ ] [ ] [ ]  | Subject Screening Number [ ] [ ] [ ] [ ] [ ] [ ] [ ] [ ] |                                     |

**Does the subject have previous/combined medication?**  
 **NO**                       **YES, please fill in the form below refer to the code at the bottom of the table.**

**Previous/Combined medication**

| NO. | Drug Name (generic name) | Indications (1) | Notes for indications | single dose | Dose Unit (2) | Dosing frequency (3) | administration route (4) | Date of beginning                                           | Sustain at the end of the study? |                                                               |
|-----|--------------------------|-----------------|-----------------------|-------------|---------------|----------------------|--------------------------|-------------------------------------------------------------|----------------------------------|---------------------------------------------------------------|
|     |                          |                 |                       |             |               |                      |                          |                                                             | Yes                              | NO → Date of end                                              |
| 1   |                          | [ ] [ ]         |                       |             | [ ] [ ]       | [ ] [ ]              | [ ] [ ]                  | [ ] [ ] [ ] [ ]   YEAR   [ ] [ ]<br>  MONTH   [ ] [ ]   DAY | <input type="checkbox"/>         | [ ] [ ] [ ] [ ]   YEAR   [ ] [ ]<br>_   MONTH   [ ] [ ]   DAY |
| 2   |                          | [ ] [ ]         |                       |             | [ ] [ ]       | [ ] [ ]              | [ ] [ ]                  | [ ] [ ] [ ] [ ]   YEAR   [ ] [ ]<br>  MONTH   [ ] [ ]   DAY | <input type="checkbox"/>         | [ ] [ ] [ ] [ ]   YEAR   [ ] [ ]<br>_   MONTH   [ ] [ ]   DAY |
| 3   |                          | [ ] [ ]         |                       |             | [ ] [ ]       | [ ] [ ]              | [ ] [ ]                  | [ ] [ ] [ ] [ ]   YEAR   [ ] [ ]<br>  MONTH   [ ] [ ]   DAY | <input type="checkbox"/>         | [ ] [ ] [ ] [ ]   YEAR   [ ] [ ]<br>_   MONTH   [ ] [ ]   DAY |
| 4   |                          | [ ] [ ]         |                       |             | [ ] [ ]       | [ ] [ ]              | [ ] [ ]                  | [ ] [ ] [ ] [ ]   YEAR   [ ] [ ]<br>  MONTH   [ ] [ ]   DAY | <input type="checkbox"/>         | [ ] [ ] [ ] [ ]   YEAR   [ ] [ ]<br>_   MONTH   [ ] [ ]   DAY |
| 5   |                          | [ ] [ ]         |                       |             | [ ] [ ]       | [ ] [ ]              | [ ] [ ]                  | [ ] [ ] [ ] [ ]   YEAR   [ ] [ ]<br>  MONTH   [ ] [ ]   DAY | <input type="checkbox"/>         | [ ] [ ] [ ] [ ]   YEAR   [ ] [ ]<br>_   MONTH   [ ] [ ]   DAY |

| (1) Indications                                                                                                                                                                     | (2) dosage Unit                                                                                                                                                                                                            | (3) Dosing frequency                                                                                                                                                                                                     | (4) administration route                                                                                                                                                                                                                                                  |
|-------------------------------------------------------------------------------------------------------------------------------------------------------------------------------------|----------------------------------------------------------------------------------------------------------------------------------------------------------------------------------------------------------------------------|--------------------------------------------------------------------------------------------------------------------------------------------------------------------------------------------------------------------------|---------------------------------------------------------------------------------------------------------------------------------------------------------------------------------------------------------------------------------------------------------------------------|
| 1=Disease studied in this study<br>2= Previous history (please fill in the history number in the Notes)<br>3= Adverse events (please fill in the number of adverse events in Notes) | 1 = micrograms (µg)    6=Unit(U)<br>2 = milligram (mg)    7=Tablet(Tab)<br>3 = gram (g)            8=capsule (Cap)<br>4 = milliliter (mL)    9=Unknown<br>5 = International Unit (IU)    10=Other, please fill in the line | 1= Once a day (qd)    6=Once a week (qw)<br>2= Twice a day (bid)    7=Before sleep(hs)<br>3= Three times a day (tid)    8=As required (prn)<br>4= Four                    9=Unknown<br>10=Other, please fill in the line | 1=oral (PO)                7= Local (skin) (TOP)<br>2= intravenous drop (IVgtt)    8= ophthalmus(OPH)<br>3=Intravenous injection (IV)    9=Inhalation(INH)<br>4=Intramuscular (IM)            10=Unknown<br>5= Subcutaneous            11= Other, please fill in the line |

|                            |                                             |                                         |
|----------------------------|---------------------------------------------|-----------------------------------------|
| Protocol Number: KY2020-29 |                                             | <b>Previous/Combined<br/>Medication</b> |
| Center Number [ ][ ]       | Subject Screening Number [ ][ ][ ][ ][ ][ ] |                                         |

|                                        |  |                                                                |                            |
|----------------------------------------|--|----------------------------------------------------------------|----------------------------|
| 4=Other (please describe in the Notes) |  | times a day<br>(qid)<br>5= once<br>every other<br>day<br>(qod) | (SQ)<br>6= sublingual (SL) |
|----------------------------------------|--|----------------------------------------------------------------|----------------------------|



|                                                                                                                                                                                                                                      |                                             |
|--------------------------------------------------------------------------------------------------------------------------------------------------------------------------------------------------------------------------------------|---------------------------------------------|
| Protocol Number: KY2020-29                                                                                                                                                                                                           | <b>Previous/Combined Non-Drug Treatment</b> |
| Center Number: <input type="text"/> <input type="text"/> <input type="text"/> Subject Screening Number <input type="text"/> <input type="text"/> <input type="text"/> <input type="text"/> <input type="text"/> <input type="text"/> |                                             |

Does the subject have previous/combined non-drug treatment?  NO  YES, Please continue to fill in the form below.

**Previous/Combined non-drug treatment**

| NO. | Name of Treatment<br>(please describe in professional medical terms) | Indications<br>(1)   | Notes for indications | Date of beginning                                                                   | Sustain at the end of the study? |                                                                                          | Whether it is the standard treatment recommended in the guidelines?<br>(2) |
|-----|----------------------------------------------------------------------|----------------------|-----------------------|-------------------------------------------------------------------------------------|----------------------------------|------------------------------------------------------------------------------------------|----------------------------------------------------------------------------|
|     |                                                                      |                      |                       |                                                                                     | YES                              | NO → Date of end                                                                         |                                                                            |
| 1   |                                                                      | <input type="text"/> |                       | <input type="text"/>  YEAR  <input type="text"/>  MONT<br><input type="text"/>  DAY | <input type="checkbox"/>         | <input type="text"/>  YEA<br>R <input type="text"/>  MONTH <br><input type="text"/>  DAY |                                                                            |
| 2   |                                                                      | <input type="text"/> |                       | <input type="text"/>  YEAR  <input type="text"/>  MONT<br><input type="text"/>  DAY | <input type="checkbox"/>         | <input type="text"/>  YEA<br>R <input type="text"/>  MONTH <br><input type="text"/>  DAY |                                                                            |
| 3   |                                                                      | <input type="text"/> |                       | <input type="text"/>  YEAR  <input type="text"/>  MONT<br><input type="text"/>  DAY | <input type="checkbox"/>         | <input type="text"/>  YEA<br>R <input type="text"/>  MONTH <br><input type="text"/>  DAY |                                                                            |
| 4   |                                                                      | <input type="text"/> |                       | <input type="text"/>  YEAR  <input type="text"/>  MONT<br><input type="text"/>  DAY | <input type="checkbox"/>         | <input type="text"/>  YEA<br>R <input type="text"/>  MONTH <br><input type="text"/>  DAY |                                                                            |

|                                     |                                               |                                             |
|-------------------------------------|-----------------------------------------------|---------------------------------------------|
| Protocol Number: KY2020-29          |                                               | <b>Previous/Combined Non-Drug Treatment</b> |
| Center Number: <input type="text"/> | Subject Screening Number <input type="text"/> |                                             |

|          |  |                      |  |                                                                                        |                          |                                                                                           |  |
|----------|--|----------------------|--|----------------------------------------------------------------------------------------|--------------------------|-------------------------------------------------------------------------------------------|--|
| <b>5</b> |  | <input type="text"/> |  | <input type="text"/>  YEAR  <input type="text"/>  MONT<br>H  <input type="text"/>  DAY | <input type="checkbox"/> | <input type="text"/>  YEA<br>R  <input type="text"/>  MONTH <br><input type="text"/>  DAY |  |
| <b>6</b> |  | <input type="text"/> |  | <input type="text"/>  YEAR  <input type="text"/>  MONT<br>H  <input type="text"/>  DAY | <input type="checkbox"/> | <input type="text"/>  YEA<br>R  <input type="text"/>  MONTH <br><input type="text"/>  DAY |  |

**(1) Indications: 1= Disease studied in this study 2= Previous history (please fill in the history number in the Notes) 3= Adverse events (please fill in the number of adverse events in Notes) 4=Other (please describe in the Notes)**

**(2) Whether it is the standard treatment recommended in the guidelines? 0=NO 1=YES 2=Not applicable**

|                                    |                                               |                                              |
|------------------------------------|-----------------------------------------------|----------------------------------------------|
| Protocol Number: KY2020-29         |                                               | <b>IMV/NIV、ECMO、HFNC、<br/>Oxygen Therapy</b> |
| Center Number <input type="text"/> | Subject Screening Number <input type="text"/> |                                              |

| <b>IMV/NIV、ECMO、HFNC、Oxygen Therapy</b> |                                                                                                                                                                                                                                   |                                                                                        |                                             |                                                                                       |                                             |
|-----------------------------------------|-----------------------------------------------------------------------------------------------------------------------------------------------------------------------------------------------------------------------------------|----------------------------------------------------------------------------------------|---------------------------------------------|---------------------------------------------------------------------------------------|---------------------------------------------|
| No.                                     | Name of Therapy                                                                                                                                                                                                                   | Date of the beginning                                                                  | Time of the beginning                       | Date of the end                                                                       | Time of the end                             |
|                                         | <input type="checkbox"/> <sub>1</sub> IMV <input type="checkbox"/> <sub>3</sub> ECMO <input type="checkbox"/> <sub>2</sub> NIV <input type="checkbox"/> <sub>4</sub><br>HFNC <input type="checkbox"/> <sub>5</sub> Oxygen Therapy | <input type="text"/>  YEAR  <input type="text"/><br>_ MONTH  <input type="text"/>  DAY | <input type="text"/> : <input type="text"/> | <input type="text"/>  YEAR  <input type="text"/><br> MONTH  <input type="text"/>  DAY | <input type="text"/> : <input type="text"/> |
|                                         | <input type="checkbox"/> <sub>1</sub> IMV <input type="checkbox"/> <sub>3</sub> ECMO <input type="checkbox"/> <sub>2</sub> NIV <input type="checkbox"/> <sub>4</sub><br>HFNC <input type="checkbox"/> <sub>5</sub> Oxygen Therapy | <input type="text"/>  YEAR  <input type="text"/><br>_ MONTH  <input type="text"/>  DAY | <input type="text"/> : <input type="text"/> | <input type="text"/>  YEAR  <input type="text"/><br> MONTH  <input type="text"/>  DAY | <input type="text"/> : <input type="text"/> |
|                                         | <input type="checkbox"/> <sub>1</sub> IMV <input type="checkbox"/> <sub>3</sub> ECMO <input type="checkbox"/> <sub>2</sub> NIV <input type="checkbox"/> <sub>4</sub><br>HFNC <input type="checkbox"/> <sub>5</sub> Oxygen Therapy | <input type="text"/>  YEAR  <input type="text"/><br>_ MONTH  <input type="text"/>  DAY | <input type="text"/> : <input type="text"/> | <input type="text"/>  YEAR  <input type="text"/><br> MONTH  <input type="text"/>  DAY | <input type="text"/> : <input type="text"/> |
|                                         | <input type="checkbox"/> <sub>1</sub> IMV <input type="checkbox"/> <sub>3</sub> ECMO <input type="checkbox"/> <sub>2</sub> NIV <input type="checkbox"/> <sub>4</sub><br>HFNC <input type="checkbox"/> <sub>5</sub> Oxygen Therapy | <input type="text"/>  YEAR  <input type="text"/><br>_ MONTH  <input type="text"/>  DAY | <input type="text"/> : <input type="text"/> | <input type="text"/>  YEAR  <input type="text"/><br> MONTH  <input type="text"/>  DAY | <input type="text"/> : <input type="text"/> |
|                                         | <input type="checkbox"/> <sub>1</sub> IMV <input type="checkbox"/> <sub>3</sub> ECMO <input type="checkbox"/> <sub>2</sub> NIV <input type="checkbox"/> <sub>4</sub><br>HFNC <input type="checkbox"/> <sub>5</sub> Oxygen Therapy | <input type="text"/>  YEAR  <input type="text"/><br>_ MONTH  <input type="text"/>  DAY | <input type="text"/> : <input type="text"/> | <input type="text"/>  YEAR  <input type="text"/><br> MONTH  <input type="text"/>  DAY | <input type="text"/> : <input type="text"/> |

|                                     |                                               |                          |
|-------------------------------------|-----------------------------------------------|--------------------------|
| Protocol Number: KY2020-29          |                                               | <b>Other Examination</b> |
| Center Number: <input type="text"/> | Subject Screening Number <input type="text"/> |                          |

**Is there any other examination to record?**       **NO**       **YES, please fill in the table below.**

| Other Examinations |                                    |        |      |                                                        |                                              |                          |       |
|--------------------|------------------------------------|--------|------|--------------------------------------------------------|----------------------------------------------|--------------------------|-------|
| Item               | Date of sample or examine          | Result | Unit | Result Interpretation                                  |                                              |                          | Notes |
|                    |                                    |        |      | 1=Normal<br>2=Abnormal,<br>no clinical<br>significance | 3=Abnormal,<br>with clinical<br>significance |                          |       |
|                    | _ _ _ _ YEAR _ _ MONT<br>H _ _ DAY |        |      | <input type="checkbox"/>                               | <input type="checkbox"/>                     | <input type="checkbox"/> |       |
|                    | _ _ _ _ YEAR _ _ MONT<br>H _ _ DAY |        |      | <input type="checkbox"/>                               | <input type="checkbox"/>                     | <input type="checkbox"/> |       |
|                    | _ _ _ _ YEAR _ _ MONT<br>H _ _ DAY |        |      | <input type="checkbox"/>                               | <input type="checkbox"/>                     | <input type="checkbox"/> |       |
|                    | _ _ _ _ YEAR _ _ MONT<br>H _ _ DAY |        |      | <input type="checkbox"/>                               | <input type="checkbox"/>                     | <input type="checkbox"/> |       |
|                    | _ _ _ _ YEAR _ _ MONT<br>H _ _ DAY |        |      | <input type="checkbox"/>                               | <input type="checkbox"/>                     | <input type="checkbox"/> |       |
|                    | _ _ _ _ YEAR _ _ MONT<br>H _ _ DAY |        |      | <input type="checkbox"/>                               | <input type="checkbox"/>                     | <input type="checkbox"/> |       |

|                                     |                                               |                          |
|-------------------------------------|-----------------------------------------------|--------------------------|
| Protocol Number: KY2020-29          |                                               | <b>Other Examination</b> |
| Center Number: <input type="text"/> | Subject Screening Number <input type="text"/> |                          |

**Is there any other examination to record?**       **NO**       **YES, please fill in the table below.**

| Other Examinations |                                                                                        |        |      |                                                      |                                |                          |       |
|--------------------|----------------------------------------------------------------------------------------|--------|------|------------------------------------------------------|--------------------------------|--------------------------|-------|
| Item               | Date of sample or examine                                                              | Result | Unit | Result Interpretation                                |                                |                          | Notes |
|                    |                                                                                        |        |      | 1=Normal<br>2=Abnormal,<br>3=Abnormal,<br>clinically | no<br>clinical<br>significance | significant              |       |
|                    | <input type="text"/>  YEAR  <input type="text"/>  MONT<br>H  <input type="text"/>  DAY |        |      | <input type="checkbox"/>                             | <input type="checkbox"/>       | <input type="checkbox"/> |       |
|                    | <input type="text"/>  YEAR  <input type="text"/>  MONT<br>H  <input type="text"/>  DAY |        |      | <input type="checkbox"/>                             | <input type="checkbox"/>       | <input type="checkbox"/> |       |
|                    | <input type="text"/>  YEAR  <input type="text"/>  MONT<br>H  <input type="text"/>  DAY |        |      | <input type="checkbox"/>                             | <input type="checkbox"/>       | <input type="checkbox"/> |       |
|                    | <input type="text"/>  YEAR  <input type="text"/>  MONT<br>H  <input type="text"/>  DAY |        |      | <input type="checkbox"/>                             | <input type="checkbox"/>       | <input type="checkbox"/> |       |
|                    | <input type="text"/>  YEAR  <input type="text"/>  MONT<br>H  <input type="text"/>  DAY |        |      | <input type="checkbox"/>                             | <input type="checkbox"/>       | <input type="checkbox"/> |       |
|                    | <input type="text"/>  YEAR  <input type="text"/>  MONT<br>H  <input type="text"/>  DAY |        |      | <input type="checkbox"/>                             | <input type="checkbox"/>       | <input type="checkbox"/> |       |
|                    | <input type="text"/>  YEAR  <input type="text"/>  MONT<br>H  <input type="text"/>  DAY |        |      | <input type="checkbox"/>                             | <input type="checkbox"/>       | <input type="checkbox"/> |       |

|                                     |                                               |                          |
|-------------------------------------|-----------------------------------------------|--------------------------|
| Protocol Number: KY2020-29          |                                               | <b>Other Examination</b> |
| Center Number: <input type="text"/> | Subject Screening Number <input type="text"/> |                          |

|  |                                                                                        |  |  |                            |                            |                            |  |
|--|----------------------------------------------------------------------------------------|--|--|----------------------------|----------------------------|----------------------------|--|
|  | <input type="text"/>  YEAR  <input type="text"/>  MONT<br>H  <input type="text"/>  DAY |  |  | <input type="checkbox"/> 1 | <input type="checkbox"/> 2 | <input type="checkbox"/> 3 |  |
|  | <input type="text"/>  YEAR  <input type="text"/>  MONT<br>H  <input type="text"/>  DAY |  |  | <input type="checkbox"/> 1 | <input type="checkbox"/> 2 | <input type="checkbox"/> 3 |  |

|                            |                                 |                      |
|----------------------------|---------------------------------|----------------------|
| Protocol Number: KY2020-29 |                                 | <b>Study Summary</b> |
| Center Number  __          | Subject Screening Number  _____ |                      |

|                      |
|----------------------|
| <b>Study Summary</b> |
|----------------------|

Whether the subject finished the study according to the protocol?

- YES, Finish Date: |\_\_|\_|\_|\_|\_|YEAR|\_|\_|MONTH|\_|\_|DAY
- NO, End Date: |\_\_|\_|\_|\_|\_|YEAR|\_|\_|MONTH|\_|\_|DAY

If the patient exit ahead of schedule, please choose the most important reason (One-Choice) :

- Disease progression occurred during the study and changes in treatment were required after comprehensive assessment by the investigators.
- Adverse events lead to an exacerbation of the disease
- The subject is reluctant to continue using the study drug.
- Pregnancy
- Loss to follow-up
- Death
- Subject withdraws the Informed Consent
- Study suspension
- Other, please describe: \_\_\_\_\_

\_\_\_\_\_

Notes (Please record other matter which needs additional clarification) :

\_\_\_\_\_

\_\_\_\_\_

\_\_\_\_\_

|                            |                                 |                        |
|----------------------------|---------------------------------|------------------------|
| Protocol Number: KY2020-29 |                                 | <b>Hospitalization</b> |
| Center Number  __          | Subject Screening Number  _____ |                        |

| <b>Information on hospitalization</b>                                                                                                                 |
|-------------------------------------------------------------------------------------------------------------------------------------------------------|
| Was the subject hospitalized with 2019-nCov respiratory infection? <input type="checkbox"/> <sub>0</sub> NO <input type="checkbox"/> <sub>1</sub> YES |
| If Yes, date of admission:  __ _ __ _ YEAR __ _ MONTH __ _ DAY                                                                                        |
| Be discharged from hospital at the end of the study or not? <input type="checkbox"/> <sub>0</sub> NO <input type="checkbox"/> <sub>1</sub> YES        |
| If yes, discharge date :  __ _ __ _ YEAR __ _ MONTH __ _ DAY                                                                                          |



|                            |                                 |              |
|----------------------------|---------------------------------|--------------|
| Protocol Number: KY2020-29 |                                 | <b>Death</b> |
| Center Number  __          | Subject Screening Number  _____ |              |

| Death                                                                                                                                                                                |                                          |                                                           |                                               |
|--------------------------------------------------------------------------------------------------------------------------------------------------------------------------------------|------------------------------------------|-----------------------------------------------------------|-----------------------------------------------|
| Are the subjects dead?                                                                                                                                                               | <input type="checkbox"/> <sub>0</sub> NO | <input type="checkbox"/> <sub>1</sub> YES, please fill in | <input type="checkbox"/> <sub>2</sub> Unknown |
| Date of death:  __ _ __ _ YEAR __ _ MONTH __ _ DAY                                                                                                                                   |                                          |                                                           |                                               |
| The cause of death :                                                                                                                                                                 |                                          |                                                           |                                               |
| <input type="checkbox"/> <sub>1</sub> Adverse events<br><input type="checkbox"/> <sub>2</sub> Unknown<br><input type="checkbox"/> <sub>3</sub> Other, please describe _____<br>_____ |                                          |                                                           |                                               |

|                            |                                 |                      |
|----------------------------|---------------------------------|----------------------|
| Protocol Number: KY2020-29 |                                 | <b>CRF Statement</b> |
| Center Number  __          | Subject Screening Number  _____ |                      |

**Investigator Statement**

I have reviewed and confirmed that all data recorded in this case report form are true, accurate, reliable, complete, and consistent with the original data. All errors or omissions have been corrected or noted.

**Signature of principal investigator:** \_\_\_\_\_

**Date:** |\_\_|\_|\_\_|\_|YEAR|\_\_|\_|MONTH|\_\_|\_|DAY

**CRA Statement**

I have checked and confirmed that all the data recorded in this case report form are true, accurate, reliable, complete and correct and consistent with the original data.

**CRA Signature:** \_\_\_\_\_

**Date:** |\_\_|\_|\_\_|\_|YEAR|\_\_|\_|MONTH|\_\_|\_|DAY

|                            |                                 |                                   |
|----------------------------|---------------------------------|-----------------------------------|
| Protocol Number: KY2020-29 |                                 | <b>Attachment<br/>Out of Plan</b> |
| Center Number  __          | Subject Screening Number  _____ |                                   |

|                                                                         |                                                         |                    |                                                                                                                                                                                                                                      |
|-------------------------------------------------------------------------|---------------------------------------------------------|--------------------|--------------------------------------------------------------------------------------------------------------------------------------------------------------------------------------------------------------------------------------|
| <b>Vital Signs</b> <input type="checkbox"/> _0 Unexamined, reason _____ |                                                         |                    |                                                                                                                                                                                                                                      |
| Date                                                                    | _ _ _ _ YEAR _ _ MONTH _ _ DAY                          |                    |                                                                                                                                                                                                                                      |
| Daily maximum temperature                                               | _ _ .  _ _ °C                                           | Measurement method | <input type="checkbox"/> _1 Axilla <input type="checkbox"/> _2 Oral <input type="checkbox"/> _3 Anus <input type="checkbox"/> _4 Ear<br><input type="checkbox"/> _5 Unknown <input type="checkbox"/> _6 Other, please describe _____ |
| Respiratory                                                             | _ _ times/min                                           | Pulse              | _ _ _ times/min                                                                                                                                                                                                                      |
| Blood pressure                                                          | _ _ _ / _ _ _  mmHg (Systolic/diastolic blood pressure) |                    |                                                                                                                                                                                                                                      |

|                                                                         |                                                         |                    |                                                                                                                                                                                                                                      |
|-------------------------------------------------------------------------|---------------------------------------------------------|--------------------|--------------------------------------------------------------------------------------------------------------------------------------------------------------------------------------------------------------------------------------|
| <b>Vital Signs</b> <input type="checkbox"/> _0 Unexamined, reason _____ |                                                         |                    |                                                                                                                                                                                                                                      |
| Date                                                                    | _ _ _ _ YEAR _ _ MONTH _ _ DAY                          |                    |                                                                                                                                                                                                                                      |
| Daily maximum temperature                                               | _ _ .  _ _ °C                                           | Measurement method | <input type="checkbox"/> _1 Axilla <input type="checkbox"/> _2 Oral <input type="checkbox"/> _3 Anus <input type="checkbox"/> _4 Ear <input type="checkbox"/> _5 Unknown<br><input type="checkbox"/> _6 Other, please describe _____ |
| Respiratory                                                             | _ _ times/min                                           | Pulse              | _ _ _ times/min                                                                                                                                                                                                                      |
| Blood pressure                                                          | _ _ _ / _ _ _  mmHg (Systolic/diastolic blood pressure) |                    |                                                                                                                                                                                                                                      |

|                                                                         |                                                         |                    |                                                                                                                                                                                                                                      |
|-------------------------------------------------------------------------|---------------------------------------------------------|--------------------|--------------------------------------------------------------------------------------------------------------------------------------------------------------------------------------------------------------------------------------|
| <b>Vital Signs</b> <input type="checkbox"/> _0 Unexamined, reason _____ |                                                         |                    |                                                                                                                                                                                                                                      |
| Date                                                                    | _ _ _ _ YEAR _ _ MONTH _ _ DAY                          |                    |                                                                                                                                                                                                                                      |
| Daily maximum temperature                                               | _ _ .  _ _ °C                                           | Measurement method | <input type="checkbox"/> _1 Axilla <input type="checkbox"/> _2 Oral <input type="checkbox"/> _3 Anus <input type="checkbox"/> _4 Ear <input type="checkbox"/> _5 Unknown<br><input type="checkbox"/> _6 Other, please describe _____ |
| Respiratory                                                             | _ _ times/min                                           | Pulse              | _ _ _ times/min                                                                                                                                                                                                                      |
| Blood pressure                                                          | _ _ _ / _ _ _  mmHg (Systolic/diastolic blood pressure) |                    |                                                                                                                                                                                                                                      |

|                                                                         |                                                         |                    |                                                                                                                                                                                                                                      |
|-------------------------------------------------------------------------|---------------------------------------------------------|--------------------|--------------------------------------------------------------------------------------------------------------------------------------------------------------------------------------------------------------------------------------|
| <b>Vital Signs</b> <input type="checkbox"/> _0 Unexamined, reason _____ |                                                         |                    |                                                                                                                                                                                                                                      |
| Date                                                                    | _ _ _ _ YEAR _ _ MONTH _ _ DAY                          |                    |                                                                                                                                                                                                                                      |
| Daily maximum temperature                                               | _ _ .  _ _ °C                                           | Measurement method | <input type="checkbox"/> _1 Axilla <input type="checkbox"/> _2 Oral <input type="checkbox"/> _3 Anus <input type="checkbox"/> _4 Ear <input type="checkbox"/> _5 Unknown<br><input type="checkbox"/> _6 Other, please describe _____ |
| Respiratory                                                             | _ _ times/min                                           | Pulse              | _ _ _ times/min                                                                                                                                                                                                                      |
| Blood pressure                                                          | _ _ _ / _ _ _  mmHg (Systolic/diastolic blood pressure) |                    |                                                                                                                                                                                                                                      |

|                            |                                 |                                   |
|----------------------------|---------------------------------|-----------------------------------|
| Protocol Number: KY2020-29 |                                 | <b>Attachment<br/>Out of Plan</b> |
| Center Number  __          | Subject Screening Number  _____ |                                   |

| <b>physical examination</b> <input type="checkbox"/> Unexamined, reason: _____ |                                                                                                               |                            |                            |                            |                              |
|--------------------------------------------------------------------------------|---------------------------------------------------------------------------------------------------------------|----------------------------|----------------------------|----------------------------|------------------------------|
| Date                                                                           | _ _ _ _ YEAR _ _ MONTH _ _ DAY                                                                                |                            |                            |                            |                              |
| Inspection Part                                                                | Result                                                                                                        |                            |                            |                            | If abnormal, please describe |
|                                                                                | 1= Normal<br>2= Abnormal, no clinical significance<br>3= Abnormal, with clinical significance<br>0=Unexamined |                            |                            |                            |                              |
| General appearance                                                             | <input type="checkbox"/> 1                                                                                    | <input type="checkbox"/> 2 | <input type="checkbox"/> 3 | <input type="checkbox"/> 0 |                              |
| Head                                                                           | <input type="checkbox"/> 1                                                                                    | <input type="checkbox"/> 2 | <input type="checkbox"/> 3 | <input type="checkbox"/> 0 |                              |
| Eyes                                                                           | <input type="checkbox"/> 1                                                                                    | <input type="checkbox"/> 2 | <input type="checkbox"/> 3 | <input type="checkbox"/> 0 |                              |
| Nose                                                                           | <input type="checkbox"/> 1                                                                                    | <input type="checkbox"/> 2 | <input type="checkbox"/> 3 | <input type="checkbox"/> 0 |                              |
| Larynx                                                                         | <input type="checkbox"/> 1                                                                                    | <input type="checkbox"/> 2 | <input type="checkbox"/> 3 | <input type="checkbox"/> 0 |                              |
| Neck and thyroid                                                               | <input type="checkbox"/> 1                                                                                    | <input type="checkbox"/> 2 | <input type="checkbox"/> 3 | <input type="checkbox"/> 0 |                              |
| Skin                                                                           | <input type="checkbox"/> 1                                                                                    | <input type="checkbox"/> 2 | <input type="checkbox"/> 3 | <input type="checkbox"/> 0 |                              |
| Cardiovascular system                                                          | <input type="checkbox"/> 1                                                                                    | <input type="checkbox"/> 2 | <input type="checkbox"/> 3 | <input type="checkbox"/> 0 |                              |
| Chest and lungs                                                                | <input type="checkbox"/> 1                                                                                    | <input type="checkbox"/> 2 | <input type="checkbox"/> 3 | <input type="checkbox"/> 0 |                              |
| Abdomen                                                                        | <input type="checkbox"/> 1                                                                                    | <input type="checkbox"/> 2 | <input type="checkbox"/> 3 | <input type="checkbox"/> 0 |                              |
| Nervous system                                                                 | <input type="checkbox"/> 1                                                                                    | <input type="checkbox"/> 2 | <input type="checkbox"/> 3 | <input type="checkbox"/> 0 |                              |
| Musculoskeletal system                                                         | <input type="checkbox"/> 1                                                                                    | <input type="checkbox"/> 2 | <input type="checkbox"/> 3 | <input type="checkbox"/> 0 |                              |
| Lymphatic system                                                               | <input type="checkbox"/> 1                                                                                    | <input type="checkbox"/> 2 | <input type="checkbox"/> 3 | <input type="checkbox"/> 0 |                              |

|                                                                                     |                                   |
|-------------------------------------------------------------------------------------|-----------------------------------|
| Protocol Number: KY2020-29                                                          | <b>Attachment<br/>Out of Plan</b> |
| Center Number [ ] [ ]      Subject Screening Number [ ] [ ] [ ] [ ] [ ] [ ] [ ] [ ] |                                   |

|                                                                                                                                                             |
|-------------------------------------------------------------------------------------------------------------------------------------------------------------|
| <b>Respiratory symptoms</b> <input type="checkbox"/> Unexamined, reason _____                                                                               |
| Date: [ ] [ ] [ ] [ ]  YEAR  [ ] [ ]  MONTH  [ ] [ ]  DAY                                                                                                   |
| Whether the subject has respiratory symptoms or not: <input type="checkbox"/> NO <input type="checkbox"/> NO, please describe: _____                        |
| Result: <input type="checkbox"/> Normal <input type="checkbox"/> Abnormal No clinical significance <input type="checkbox"/> Abnormal Significant clinically |

|                                                                                                                                                             |
|-------------------------------------------------------------------------------------------------------------------------------------------------------------|
| <b>Respiratory symptoms</b> <input type="checkbox"/> Unexamined, reason _____                                                                               |
| Date: [ ] [ ] [ ] [ ]  YEAR  [ ] [ ]  MONTH  [ ] [ ]  DAY                                                                                                   |
| Whether the subject has respiratory symptoms or not: <input type="checkbox"/> NO <input type="checkbox"/> NO, please describe: _____                        |
| Result: <input type="checkbox"/> Normal <input type="checkbox"/> Abnormal No clinical significance <input type="checkbox"/> Abnormal Significant clinically |

|                                                                                                                                                             |
|-------------------------------------------------------------------------------------------------------------------------------------------------------------|
| <b>Respiratory symptoms</b> <input type="checkbox"/> Unexamined, reason _____                                                                               |
| Date: [ ] [ ] [ ] [ ]  YEAR  [ ] [ ]  MONTH  [ ] [ ]  DAY                                                                                                   |
| Whether the subject has respiratory symptoms or not: <input type="checkbox"/> NO <input type="checkbox"/> NO, please describe: _____                        |
| Result: <input type="checkbox"/> Normal <input type="checkbox"/> Abnormal No clinical significance <input type="checkbox"/> Abnormal Significant clinically |

|                                                                                                                                                             |
|-------------------------------------------------------------------------------------------------------------------------------------------------------------|
| <b>Respiratory symptoms</b> <input type="checkbox"/> Unexamined, reason _____                                                                               |
| Date: [ ] [ ] [ ] [ ]  YEAR  [ ] [ ]  MONTH  [ ] [ ]  DAY                                                                                                   |
| Whether the subject has respiratory symptoms or not: <input type="checkbox"/> NO <input type="checkbox"/> NO, please describe: _____                        |
| Result: <input type="checkbox"/> Normal <input type="checkbox"/> Abnormal No clinical significance <input type="checkbox"/> Abnormal Significant clinically |

|                                                                                                                                                             |
|-------------------------------------------------------------------------------------------------------------------------------------------------------------|
| <b>Respiratory symptoms</b> <input type="checkbox"/> Unexamined, reason _____                                                                               |
| Date: [ ] [ ] [ ] [ ]  YEAR  [ ] [ ]  MONTH  [ ] [ ]  DAY                                                                                                   |
| Whether the subject has respiratory symptoms or not: <input type="checkbox"/> NO <input type="checkbox"/> NO, please describe: _____                        |
| Result: <input type="checkbox"/> Normal <input type="checkbox"/> Abnormal No clinical significance <input type="checkbox"/> Abnormal Significant clinically |

|                                                                                                                                                             |
|-------------------------------------------------------------------------------------------------------------------------------------------------------------|
| <b>Respiratory symptoms</b> <input type="checkbox"/> Unexamined, reason _____                                                                               |
| Date: [ ] [ ] [ ] [ ]  YEAR  [ ] [ ]  MONTH  [ ] [ ]  DAY                                                                                                   |
| Whether the subject has respiratory symptoms or not: <input type="checkbox"/> NO <input type="checkbox"/> NO, please describe: _____                        |
| Result: <input type="checkbox"/> Normal <input type="checkbox"/> Abnormal No clinical significance <input type="checkbox"/> Abnormal Significant clinically |

|                                                   |                                   |
|---------------------------------------------------|-----------------------------------|
| Protocol Number: KY2020-29                        | <b>Attachment<br/>Out of Plan</b> |
| Center Number  __    Subject Screening Number  __ |                                   |

| <b>Blood Count</b> <input type="checkbox"/> Unexamined, reason _____ |                |                                                                                        |                            |                            |                            |                            |
|----------------------------------------------------------------------|----------------|----------------------------------------------------------------------------------------|----------------------------|----------------------------|----------------------------|----------------------------|
| Date:  __          YEAR  __      MONTH  __      DAY                  |                |                                                                                        |                            | Normal range Number:  __   |                            |                            |
| Item                                                                 | Result         |                                                                                        | Result Interpretation      |                            |                            | Unexamined                 |
|                                                                      | Measured Value | Unit                                                                                   | Normal                     | Abnormal                   |                            |                            |
|                                                                      |                |                                                                                        |                            | No clinical significance   | Significant clinically     |                            |
| Red Blood Cell (RBC)                                                 |                | <input type="checkbox"/> 1 10 <sup>12</sup> /L <input type="checkbox"/> 2 Other: _____ | <input type="checkbox"/> 1 | <input type="checkbox"/> 2 | <input type="checkbox"/> 3 | <input type="checkbox"/> 0 |
| White Blood Cell                                                     |                | <input type="checkbox"/> 1 10 <sup>9</sup> /L <input type="checkbox"/> 2 Other: _____  | <input type="checkbox"/> 1 | <input type="checkbox"/> 2 | <input type="checkbox"/> 3 | <input type="checkbox"/> 0 |
| Hemoglobin (Hb)                                                      |                | <input type="checkbox"/> 1 g/L <input type="checkbox"/> 2 Other: _____                 | <input type="checkbox"/> 1 | <input type="checkbox"/> 2 | <input type="checkbox"/> 3 | <input type="checkbox"/> 0 |
| Platelet (PLT)                                                       |                | <input type="checkbox"/> 1 10 <sup>9</sup> /L <input type="checkbox"/> 2 Other: _____  | <input type="checkbox"/> 1 | <input type="checkbox"/> 2 | <input type="checkbox"/> 3 | <input type="checkbox"/> 0 |
| Neutrophil (ANC)                                                     |                | <input type="checkbox"/> 1 10 <sup>9</sup> /L <input type="checkbox"/> 2 Other: _____  | <input type="checkbox"/> 1 | <input type="checkbox"/> 2 | <input type="checkbox"/> 3 | <input type="checkbox"/> 0 |
| Lymphocyte (LY)                                                      |                | <input type="checkbox"/> 1 10 <sup>9</sup> /L <input type="checkbox"/> 2 Other: _____  | <input type="checkbox"/> 1 | <input type="checkbox"/> 2 | <input type="checkbox"/> 3 | <input type="checkbox"/> 0 |
| Monocyte (MO)                                                        |                | <input type="checkbox"/> 1 10 <sup>9</sup> /L <input type="checkbox"/> 2 Other: _____  | <input type="checkbox"/> 1 | <input type="checkbox"/> 2 | <input type="checkbox"/> 3 | <input type="checkbox"/> 0 |
| Eosinophil (EO)                                                      |                | <input type="checkbox"/> 1 10 <sup>9</sup> /L <input type="checkbox"/> 2 Other: _____  | <input type="checkbox"/> 1 | <input type="checkbox"/> 2 | <input type="checkbox"/> 3 | <input type="checkbox"/> 0 |
| Basophil (BA)                                                        |                | <input type="checkbox"/> 1 10 <sup>9</sup> /L <input type="checkbox"/> 2 Other: _____  | <input type="checkbox"/> 1 | <input type="checkbox"/> 2 | <input type="checkbox"/> 3 | <input type="checkbox"/> 0 |

| <b>Blood Count</b> <input type="checkbox"/> Unexamined, reason _____ |                |                                                                                        |                            |                            |                            |                            |
|----------------------------------------------------------------------|----------------|----------------------------------------------------------------------------------------|----------------------------|----------------------------|----------------------------|----------------------------|
| Date:  __          YEAR  __      MONTH  __      DAY                  |                |                                                                                        |                            | Normal range Number:  __   |                            |                            |
| Item                                                                 | Result         |                                                                                        | Result Interpretation      |                            |                            | Unexamined                 |
|                                                                      | Measured Value | Unit                                                                                   | Normal                     | Abnormal                   |                            |                            |
|                                                                      |                |                                                                                        |                            | No clinical significance   | Significant clinically     |                            |
| Red Blood Cell (RBC)                                                 |                | <input type="checkbox"/> 1 10 <sup>12</sup> /L <input type="checkbox"/> 2 Other: _____ | <input type="checkbox"/> 1 | <input type="checkbox"/> 2 | <input type="checkbox"/> 3 | <input type="checkbox"/> 0 |
| White Blood Cell                                                     |                | <input type="checkbox"/> 1 10 <sup>9</sup> /L <input type="checkbox"/> 2 Other: _____  | <input type="checkbox"/> 1 | <input type="checkbox"/> 2 | <input type="checkbox"/> 3 | <input type="checkbox"/> 0 |
| Hemoglobin (Hb)                                                      |                | <input type="checkbox"/> 1 g/L <input type="checkbox"/> 2 Other: _____                 | <input type="checkbox"/> 1 | <input type="checkbox"/> 2 | <input type="checkbox"/> 3 | <input type="checkbox"/> 0 |
| Platelet (PLT)                                                       |                | <input type="checkbox"/> 1 10 <sup>9</sup> /L <input type="checkbox"/> 2 Other: _____  | <input type="checkbox"/> 1 | <input type="checkbox"/> 2 | <input type="checkbox"/> 3 | <input type="checkbox"/> 0 |
| Neutrophil (ANC)                                                     |                | <input type="checkbox"/> 1 10 <sup>9</sup> /L <input type="checkbox"/> 2 Other: _____  | <input type="checkbox"/> 1 | <input type="checkbox"/> 2 | <input type="checkbox"/> 3 | <input type="checkbox"/> 0 |
| Lymphocyte (LY)                                                      |                | <input type="checkbox"/> 1 10 <sup>9</sup> /L <input type="checkbox"/> 2 Other: _____  | <input type="checkbox"/> 1 | <input type="checkbox"/> 2 | <input type="checkbox"/> 3 | <input type="checkbox"/> 0 |
| Monocyte (MO)                                                        |                | <input type="checkbox"/> 1 10 <sup>9</sup> /L <input type="checkbox"/> 2 Other: _____  | <input type="checkbox"/> 1 | <input type="checkbox"/> 2 | <input type="checkbox"/> 3 | <input type="checkbox"/> 0 |
| Eosinophil (EO)                                                      |                | <input type="checkbox"/> 1 10 <sup>9</sup> /L <input type="checkbox"/> 2 Other: _____  | <input type="checkbox"/> 1 | <input type="checkbox"/> 2 | <input type="checkbox"/> 3 | <input type="checkbox"/> 0 |
| Basophil (BA)                                                        |                | <input type="checkbox"/> 1 10 <sup>9</sup> /L <input type="checkbox"/> 2 Other: _____  | <input type="checkbox"/> 1 | <input type="checkbox"/> 2 | <input type="checkbox"/> 3 | <input type="checkbox"/> 0 |

|                            |                              |                                   |
|----------------------------|------------------------------|-----------------------------------|
| Protocol Number: KY2020-29 |                              | <b>Attachment<br/>Out of Plan</b> |
| Center Number  __          | Subject Screening Number  __ |                                   |

| <b>Blood Biochemistry</b> <input type="checkbox"/> Unexamined, reason _____ |                |                                                                                                 |                                       |                                         |                                       |                                       |  |
|-----------------------------------------------------------------------------|----------------|-------------------------------------------------------------------------------------------------|---------------------------------------|-----------------------------------------|---------------------------------------|---------------------------------------|--|
| Date  __   __   __   YEAR __   MONTH __   DAY                               |                |                                                                                                 |                                       | Normal range Number:  __   __   __   __ |                                       |                                       |  |
| Item                                                                        | Result         |                                                                                                 | Result Interpretation                 |                                         |                                       | Unexamined                            |  |
|                                                                             | Measured Value | Unit                                                                                            | Normal                                | Abnormal                                |                                       |                                       |  |
|                                                                             |                |                                                                                                 |                                       | No clinical significance                | Significant clinically                |                                       |  |
| Glutamic-pyruvic transaminase (ALT)                                         |                | <input type="checkbox"/> <sub>1</sub> U/L <input type="checkbox"/> <sub>2</sub> Other: _____    | <input type="checkbox"/> <sub>1</sub> | <input type="checkbox"/> <sub>2</sub>   | <input type="checkbox"/> <sub>3</sub> | <input type="checkbox"/> <sub>0</sub> |  |
| Glutamic-oxalacetic transaminase (AST)                                      |                | <input type="checkbox"/> <sub>1</sub> U/L <input type="checkbox"/> <sub>2</sub> Other: _____    | <input type="checkbox"/> <sub>1</sub> | <input type="checkbox"/> <sub>2</sub>   | <input type="checkbox"/> <sub>3</sub> | <input type="checkbox"/> <sub>0</sub> |  |
| Total Bilirubin (TBIL)                                                      |                | <input type="checkbox"/> <sub>1</sub> µmol/L <input type="checkbox"/> <sub>2</sub> Other: _____ | <input type="checkbox"/> <sub>1</sub> | <input type="checkbox"/> <sub>2</sub>   | <input type="checkbox"/> <sub>3</sub> | <input type="checkbox"/> <sub>0</sub> |  |
| Albumin (ALB)                                                               |                | <input type="checkbox"/> <sub>1</sub> g/L <input type="checkbox"/> <sub>2</sub> Other: _____    | <input type="checkbox"/> <sub>1</sub> | <input type="checkbox"/> <sub>2</sub>   | <input type="checkbox"/> <sub>3</sub> | <input type="checkbox"/> <sub>0</sub> |  |
| γ- glutamyl transpeptidase (GGT)                                            |                | <input type="checkbox"/> <sub>1</sub> U/L <input type="checkbox"/> <sub>2</sub> Other: _____    | <input type="checkbox"/> <sub>1</sub> | <input type="checkbox"/> <sub>2</sub>   | <input type="checkbox"/> <sub>3</sub> | <input type="checkbox"/> <sub>0</sub> |  |
| Lactic dehydrogenase (LDH)                                                  |                | <input type="checkbox"/> <sub>1</sub> U/L <input type="checkbox"/> <sub>2</sub> Other: _____    | <input type="checkbox"/> <sub>1</sub> | <input type="checkbox"/> <sub>2</sub>   | <input type="checkbox"/> <sub>3</sub> | <input type="checkbox"/> <sub>0</sub> |  |
| Creatine kinase (CK)                                                        |                | <input type="checkbox"/> <sub>1</sub> U/L <input type="checkbox"/> <sub>2</sub> Other: _____    | <input type="checkbox"/> <sub>1</sub> | <input type="checkbox"/> <sub>2</sub>   | <input type="checkbox"/> <sub>3</sub> | <input type="checkbox"/> <sub>0</sub> |  |
| Creatine kinase isoenzyme (CK-MB)                                           |                | <input type="checkbox"/> <sub>1</sub> U/L <input type="checkbox"/> <sub>2</sub> Other: _____    | <input type="checkbox"/> <sub>1</sub> | <input type="checkbox"/> <sub>2</sub>   | <input type="checkbox"/> <sub>3</sub> | <input type="checkbox"/> <sub>0</sub> |  |
| Blood urea nitrogen (BUN)                                                   |                | <input type="checkbox"/> <sub>1</sub> mmol/L <input type="checkbox"/> <sub>2</sub> Other: _____ | <input type="checkbox"/> <sub>1</sub> | <input type="checkbox"/> <sub>2</sub>   | <input type="checkbox"/> <sub>3</sub> | <input type="checkbox"/> <sub>0</sub> |  |
| Urea (Urea)                                                                 |                | <input type="checkbox"/> <sub>1</sub> mmol/L <input type="checkbox"/> <sub>2</sub> Other: _____ | <input type="checkbox"/> <sub>1</sub> | <input type="checkbox"/> <sub>2</sub>   | <input type="checkbox"/> <sub>3</sub> | <input type="checkbox"/> <sub>0</sub> |  |
| Serum creatinine (CR)                                                       |                | <input type="checkbox"/> <sub>1</sub> µmol/L <input type="checkbox"/> <sub>2</sub> Other: _____ | <input type="checkbox"/> <sub>1</sub> | <input type="checkbox"/> <sub>2</sub>   | <input type="checkbox"/> <sub>3</sub> | <input type="checkbox"/> <sub>0</sub> |  |

|                                                                                                           |                                   |
|-----------------------------------------------------------------------------------------------------------|-----------------------------------|
| Protocol Number: KY2020-29                                                                                | <b>Attachment<br/>Out of Plan</b> |
| Center Number <input type="text" value="___"/> Subject Screening Number <input type="text" value="____"/> |                                   |

| <b>Urine Test</b> <input type="checkbox"/> Unexamined, reason _____                                                                                                                                                                                                                             |                |                                                                                                         |                                       |                                       |                                       |                                       |
|-------------------------------------------------------------------------------------------------------------------------------------------------------------------------------------------------------------------------------------------------------------------------------------------------|----------------|---------------------------------------------------------------------------------------------------------|---------------------------------------|---------------------------------------|---------------------------------------|---------------------------------------|
| Date: <input type="text" value="___"/>   <input type="text" value="___"/>  YEAR  <input type="text" value="___"/>   <input type="text" value="___"/>  MONTH  <input type="text" value="___"/>   <input type="text" value="___"/>  DAY    Normal range Number: <input type="text" value="____"/> |                |                                                                                                         |                                       |                                       |                                       |                                       |
| Item                                                                                                                                                                                                                                                                                            | Result         |                                                                                                         | Result Interpretation                 |                                       |                                       | Unexamined                            |
|                                                                                                                                                                                                                                                                                                 | Measured Value | Unit                                                                                                    | Normal                                | Abnormal                              |                                       |                                       |
|                                                                                                                                                                                                                                                                                                 |                |                                                                                                         |                                       | No clinical significance              | Significant clinically                |                                       |
| Urine Protein                                                                                                                                                                                                                                                                                   |                | <input type="checkbox"/> <sub>1</sub> Not Applicable <input type="checkbox"/> <sub>2</sub> Other: _____ | <input type="checkbox"/> <sub>1</sub> | <input type="checkbox"/> <sub>2</sub> | <input type="checkbox"/> <sub>3</sub> | <input type="checkbox"/> <sub>0</sub> |
| Urine Glucose                                                                                                                                                                                                                                                                                   |                | <input type="checkbox"/> <sub>1</sub> mmol/L <input type="checkbox"/> <sub>2</sub> Other: _____         | <input type="checkbox"/> <sub>1</sub> | <input type="checkbox"/> <sub>2</sub> | <input type="checkbox"/> <sub>3</sub> | <input type="checkbox"/> <sub>0</sub> |
| Urine PH value                                                                                                                                                                                                                                                                                  |                | <input type="checkbox"/> <sub>1</sub> Not Applicable <input type="checkbox"/> <sub>2</sub> Other: _____ | <input type="checkbox"/> <sub>1</sub> | <input type="checkbox"/> <sub>2</sub> | <input type="checkbox"/> <sub>3</sub> | <input type="checkbox"/> <sub>0</sub> |
| Urine Erythrocyte                                                                                                                                                                                                                                                                               |                | <input type="checkbox"/> <sub>1</sub> Not Applicable <input type="checkbox"/> <sub>2</sub> Other: _____ | <input type="checkbox"/> <sub>1</sub> | <input type="checkbox"/> <sub>2</sub> | <input type="checkbox"/> <sub>3</sub> | <input type="checkbox"/> <sub>0</sub> |
| Urine Leukocyte                                                                                                                                                                                                                                                                                 |                | <input type="checkbox"/> <sub>1</sub> Not Applicable <input type="checkbox"/> <sub>2</sub> Other: _____ | <input type="checkbox"/> <sub>1</sub> | <input type="checkbox"/> <sub>2</sub> | <input type="checkbox"/> <sub>3</sub> | <input type="checkbox"/> <sub>0</sub> |
| Urine Ketone                                                                                                                                                                                                                                                                                    |                | <input type="checkbox"/> <sub>1</sub> Not Applicable <input type="checkbox"/> <sub>2</sub> Other: _____ | <input type="checkbox"/> <sub>1</sub> | <input type="checkbox"/> <sub>2</sub> | <input type="checkbox"/> <sub>3</sub> | <input type="checkbox"/> <sub>0</sub> |

| <b>Urine Test</b> <input type="checkbox"/> Unexamined, reason _____                                                                                                                                                                                                                             |                |                                                                                                         |                                       |                                       |                                       |                                       |
|-------------------------------------------------------------------------------------------------------------------------------------------------------------------------------------------------------------------------------------------------------------------------------------------------|----------------|---------------------------------------------------------------------------------------------------------|---------------------------------------|---------------------------------------|---------------------------------------|---------------------------------------|
| Date: <input type="text" value="___"/>   <input type="text" value="___"/>  YEAR  <input type="text" value="___"/>   <input type="text" value="___"/>  MONTH  <input type="text" value="___"/>   <input type="text" value="___"/>  DAY    Normal range Number: <input type="text" value="____"/> |                |                                                                                                         |                                       |                                       |                                       |                                       |
| Item                                                                                                                                                                                                                                                                                            | Result         |                                                                                                         | Result Interpretation                 |                                       |                                       | Unexamined                            |
|                                                                                                                                                                                                                                                                                                 | Measured Value | Unit                                                                                                    | Normal                                | Abnormal                              |                                       |                                       |
|                                                                                                                                                                                                                                                                                                 |                |                                                                                                         |                                       | No clinical significance              | Significant clinically                |                                       |
| Urine Protein                                                                                                                                                                                                                                                                                   |                | <input type="checkbox"/> <sub>1</sub> Not Applicable <input type="checkbox"/> <sub>2</sub> Other: _____ | <input type="checkbox"/> <sub>1</sub> | <input type="checkbox"/> <sub>2</sub> | <input type="checkbox"/> <sub>3</sub> | <input type="checkbox"/> <sub>0</sub> |
| Urine Glucose                                                                                                                                                                                                                                                                                   |                | <input type="checkbox"/> <sub>1</sub> mmol/L <input type="checkbox"/> <sub>2</sub> Other: _____         | <input type="checkbox"/> <sub>1</sub> | <input type="checkbox"/> <sub>2</sub> | <input type="checkbox"/> <sub>3</sub> | <input type="checkbox"/> <sub>0</sub> |
| Urine PH value                                                                                                                                                                                                                                                                                  |                | <input type="checkbox"/> <sub>1</sub> Not Applicable <input type="checkbox"/> <sub>2</sub> Other: _____ | <input type="checkbox"/> <sub>1</sub> | <input type="checkbox"/> <sub>2</sub> | <input type="checkbox"/> <sub>3</sub> | <input type="checkbox"/> <sub>0</sub> |
| Urine Erythrocyte                                                                                                                                                                                                                                                                               |                | <input type="checkbox"/> <sub>1</sub> Not Applicable <input type="checkbox"/> <sub>2</sub> Other: _____ | <input type="checkbox"/> <sub>1</sub> | <input type="checkbox"/> <sub>2</sub> | <input type="checkbox"/> <sub>3</sub> | <input type="checkbox"/> <sub>0</sub> |
| Urine Leukocyte                                                                                                                                                                                                                                                                                 |                | <input type="checkbox"/> <sub>1</sub> Not Applicable <input type="checkbox"/> <sub>2</sub> Other: _____ | <input type="checkbox"/> <sub>1</sub> | <input type="checkbox"/> <sub>2</sub> | <input type="checkbox"/> <sub>3</sub> | <input type="checkbox"/> <sub>0</sub> |
| Urine Ketone                                                                                                                                                                                                                                                                                    |                | <input type="checkbox"/> <sub>1</sub> Not Applicable <input type="checkbox"/> <sub>2</sub> Other: _____ | <input type="checkbox"/> <sub>1</sub> | <input type="checkbox"/> <sub>2</sub> | <input type="checkbox"/> <sub>3</sub> | <input type="checkbox"/> <sub>0</sub> |



|                            |                              |                                   |
|----------------------------|------------------------------|-----------------------------------|
| Protocol Number: KY2020-29 |                              | <b>Attachment<br/>Out of Plan</b> |
| Center Number  __          | Subject Screening Number  __ |                                   |

| <b>Coagulation Function</b> <input type="checkbox"/> _0 Unexamined, reason _____ |                |                                                                                     |                             |                                 |                             |                             |
|----------------------------------------------------------------------------------|----------------|-------------------------------------------------------------------------------------|-----------------------------|---------------------------------|-----------------------------|-----------------------------|
| Date:  __ _ __ _ YEAR __ _ __ MONTH __ _ __ DAY                                  |                |                                                                                     |                             | Normal range Number:  __ _ __ _ |                             |                             |
| Item                                                                             | Result         |                                                                                     | Result Interpretation       |                                 |                             | Unexamined                  |
|                                                                                  | Measured Value | Unit                                                                                | Normal                      | Abnormal                        |                             |                             |
|                                                                                  |                |                                                                                     |                             | No clinical significance        | Significant clinically      |                             |
| ProthrombinTime (PT)                                                             |                | <input type="checkbox"/> _1 S <input type="checkbox"/> _2 Other: _____              | <input type="checkbox"/> _1 | <input type="checkbox"/> _2     | <input type="checkbox"/> _3 | <input type="checkbox"/> _0 |
| Activated Partial Thromboplastin Time (APTT)                                     |                | <input type="checkbox"/> _1 S <input type="checkbox"/> _2 Other: _____              | <input type="checkbox"/> _1 | <input type="checkbox"/> _2     | <input type="checkbox"/> _3 | <input type="checkbox"/> _0 |
| Thrombin Time (TT)                                                               |                | <input type="checkbox"/> _1 S <input type="checkbox"/> _2 Other: _____              | <input type="checkbox"/> _1 | <input type="checkbox"/> _2     | <input type="checkbox"/> _3 | <input type="checkbox"/> _0 |
| Fibrinogen (Fbg)                                                                 |                | <input type="checkbox"/> _1 g/L <input type="checkbox"/> _2 Other: _____            | <input type="checkbox"/> _1 | <input type="checkbox"/> _2     | <input type="checkbox"/> _3 | <input type="checkbox"/> _0 |
| International Normalized Ratio (INR)                                             |                | <input type="checkbox"/> _1 Not Applicable <input type="checkbox"/> _2 Other: _____ | <input type="checkbox"/> _1 | <input type="checkbox"/> _2     | <input type="checkbox"/> _3 | <input type="checkbox"/> _0 |

| <b>Coagulation Function</b> <input type="checkbox"/> _0 Unexamined, reason _____ |                |                                                                                     |                             |                                 |                             |                             |
|----------------------------------------------------------------------------------|----------------|-------------------------------------------------------------------------------------|-----------------------------|---------------------------------|-----------------------------|-----------------------------|
| Date:  __ _ __ _ YEAR __ _ __ MONTH __ _ __ DAY                                  |                |                                                                                     |                             | Normal range Number:  __ _ __ _ |                             |                             |
| Item                                                                             | Result         |                                                                                     | Result Interpretation       |                                 |                             | Unexamined                  |
|                                                                                  | Measured Value | Unit                                                                                | Normal                      | Abnormal                        |                             |                             |
|                                                                                  |                |                                                                                     |                             | No clinical significance        | Significant clinically      |                             |
| ProthrombinTime (PT)                                                             |                | <input type="checkbox"/> _1 S <input type="checkbox"/> _2 Other: _____              | <input type="checkbox"/> _1 | <input type="checkbox"/> _2     | <input type="checkbox"/> _3 | <input type="checkbox"/> _0 |
| Activated Partial Thromboplastin Time (APTT)                                     |                | <input type="checkbox"/> _1 S <input type="checkbox"/> _2 Other: _____              | <input type="checkbox"/> _1 | <input type="checkbox"/> _2     | <input type="checkbox"/> _3 | <input type="checkbox"/> _0 |
| Thrombin Time (TT)                                                               |                | <input type="checkbox"/> _1 S <input type="checkbox"/> _2 Other: _____              | <input type="checkbox"/> _1 | <input type="checkbox"/> _2     | <input type="checkbox"/> _3 | <input type="checkbox"/> _0 |
| Fibrinogen (Fbg)                                                                 |                | <input type="checkbox"/> _1 g/L <input type="checkbox"/> _2 Other: _____            | <input type="checkbox"/> _1 | <input type="checkbox"/> _2     | <input type="checkbox"/> _3 | <input type="checkbox"/> _0 |
| International Normalized Ratio (INR)                                             |                | <input type="checkbox"/> _1 Not Applicable <input type="checkbox"/> _2 Other: _____ | <input type="checkbox"/> _1 | <input type="checkbox"/> _2     | <input type="checkbox"/> _3 | <input type="checkbox"/> _0 |

|                            |                                      |                                   |
|----------------------------|--------------------------------------|-----------------------------------|
| Protocol Number: KY2020-29 |                                      | <b>Attachment<br/>Out of Plan</b> |
| Center Number  __ _        | Subject Screening Number  __ _ _ _ _ |                                   |

| <b>C-REACTION PROTEIN (CRP)</b> <input type="checkbox"/> _0 Unexamined, reason _____ |                |                                                                           |                       |                                  |                             |
|--------------------------------------------------------------------------------------|----------------|---------------------------------------------------------------------------|-----------------------|----------------------------------|-----------------------------|
| Date:  __ _ _ _ _ YEAR __ _ MONTH __ _ DAY                                           |                |                                                                           |                       | Normal range Number:  __ _ _ _ _ |                             |
| Item                                                                                 | Result         |                                                                           | Result Interpretation |                                  |                             |
| C-REACTION PROTEIN<br>(CRP)                                                          | Measured Value | Unit                                                                      | Normal                | Abnormal                         |                             |
|                                                                                      |                | <input type="checkbox"/> _1 mg/L <input type="checkbox"/> _2 Other: _____ |                       | <input type="checkbox"/> _1      | No clinical significance    |
|                                                                                      |                |                                                                           |                       | <input type="checkbox"/> _2      | <input type="checkbox"/> _3 |

| <b>C-REACTION PROTEIN (CRP)</b> <input type="checkbox"/> _0 Unexamined, reason _____ |                |                                                                           |                       |                                  |                             |
|--------------------------------------------------------------------------------------|----------------|---------------------------------------------------------------------------|-----------------------|----------------------------------|-----------------------------|
| Date:  __ _ _ _ _ YEAR __ _ MONTH __ _ DAY                                           |                |                                                                           |                       | Normal range Number:  __ _ _ _ _ |                             |
| Item                                                                                 | Result         |                                                                           | Result Interpretation |                                  |                             |
| C-REACTION PROTEIN<br>(CRP)                                                          | Measured Value | Unit                                                                      | Normal                | Abnormal                         |                             |
|                                                                                      |                | <input type="checkbox"/> _1 mg/L <input type="checkbox"/> _2 Other: _____ |                       | <input type="checkbox"/> _1      | No clinical significance    |
|                                                                                      |                |                                                                           |                       | <input type="checkbox"/> _2      | <input type="checkbox"/> _3 |

| <b>C-REACTION PROTEIN (CRP)</b> <input type="checkbox"/> _0 Unexamined, reason _____ |                |                                                                           |                       |                                  |                             |
|--------------------------------------------------------------------------------------|----------------|---------------------------------------------------------------------------|-----------------------|----------------------------------|-----------------------------|
| Date:  __ _ _ _ _ YEAR __ _ MONTH __ _ DAY                                           |                |                                                                           |                       | Normal range Number:  __ _ _ _ _ |                             |
| Item                                                                                 | Result         |                                                                           | Result Interpretation |                                  |                             |
| C-REACTION PROTEIN<br>(CRP)                                                          | Measured Value | Unit                                                                      | Normal                | Abnormal                         |                             |
|                                                                                      |                | <input type="checkbox"/> _1 mg/L <input type="checkbox"/> _2 Other: _____ |                       | <input type="checkbox"/> _1      | No clinical significance    |
|                                                                                      |                |                                                                           |                       | <input type="checkbox"/> _2      | <input type="checkbox"/> _3 |

| <b>C-REACTION PROTEIN (CRP)</b> <input type="checkbox"/> _0 Unexamined, reason _____ |                |                                                                           |                       |                                  |                             |
|--------------------------------------------------------------------------------------|----------------|---------------------------------------------------------------------------|-----------------------|----------------------------------|-----------------------------|
| Date:  __ _ _ _ _ YEAR __ _ MONTH __ _ DAY                                           |                |                                                                           |                       | Normal range Number:  __ _ _ _ _ |                             |
| Item                                                                                 | Result         |                                                                           | Result Interpretation |                                  |                             |
| C-REACTION PROTEIN<br>(CRP)                                                          | Measured Value | Unit                                                                      | Normal                | Abnormal                         |                             |
|                                                                                      |                | <input type="checkbox"/> _1 mg/L <input type="checkbox"/> _2 Other: _____ |                       | <input type="checkbox"/> _1      | No clinical significance    |
|                                                                                      |                |                                                                           |                       | <input type="checkbox"/> _2      | <input type="checkbox"/> _3 |

|                            |                                      |                                   |
|----------------------------|--------------------------------------|-----------------------------------|
| Protocol Number: KY2020-29 |                                      | <b>Attachment<br/>Out of Plan</b> |
| Center Number  __ _        | Subject Screening Number  __ _ _ _ _ |                                   |

| <b>Erythrocyte Sedimentation Rate (ESR)</b> <input type="checkbox"/> _0Unexamined, reason _____ |                |                                                                    |                             |                             |                             |
|-------------------------------------------------------------------------------------------------|----------------|--------------------------------------------------------------------|-----------------------------|-----------------------------|-----------------------------|
| Date :  __ _ _ _ YEAR __ _ MONTH __ _ DAY                                                       |                |                                                                    |                             |                             | Normal range                |
| Number:  __ _ _ _                                                                               |                |                                                                    |                             |                             |                             |
| Item                                                                                            | Result         |                                                                    | Result Interpretation       |                             |                             |
| Erythrocyte<br>Sedimentation Rate<br><i>(ESR)</i>                                               | Measured Value | Unit                                                               | Normal                      | Abnormal                    |                             |
|                                                                                                 |                |                                                                    |                             | No clinical significance    | Significant clinically      |
|                                                                                                 |                | <input type="checkbox"/> _1 mm/h <input type="checkbox"/> _2Other: | <input type="checkbox"/> _1 | <input type="checkbox"/> _2 | <input type="checkbox"/> _3 |

| <b>Erythrocyte Sedimentation Rate (ESR)</b> <input type="checkbox"/> _0Unexamined, reason _____ |                |                                                                    |                             |                             |                             |
|-------------------------------------------------------------------------------------------------|----------------|--------------------------------------------------------------------|-----------------------------|-----------------------------|-----------------------------|
| Date :  __ _ _ _ YEAR __ _ MONTH __ _ DAY                                                       |                |                                                                    |                             |                             | Normal range                |
| Number:  __ _ _ _                                                                               |                |                                                                    |                             |                             |                             |
| Item                                                                                            | Result         |                                                                    | Result Interpretation       |                             |                             |
| Erythrocyte<br>Sedimentation Rate<br><i>(ESR)</i>                                               | Measured Value | Unit                                                               | Normal                      | Abnormal                    |                             |
|                                                                                                 |                |                                                                    |                             | No clinical significance    | Significant clinically      |
|                                                                                                 |                | <input type="checkbox"/> _1 mm/h <input type="checkbox"/> _2Other: | <input type="checkbox"/> _1 | <input type="checkbox"/> _2 | <input type="checkbox"/> _3 |

| <b>Erythrocyte Sedimentation Rate (ESR)</b> <input type="checkbox"/> _0Unexamined, reason _____ |                |                                                                    |                             |                             |                             |
|-------------------------------------------------------------------------------------------------|----------------|--------------------------------------------------------------------|-----------------------------|-----------------------------|-----------------------------|
| Date :  __ _ _ _ YEAR __ _ MONTH __ _ DAY                                                       |                |                                                                    |                             |                             | Normal range                |
| Number:  __ _ _ _                                                                               |                |                                                                    |                             |                             |                             |
| Item                                                                                            | Result         |                                                                    | Result Interpretation       |                             |                             |
| Erythrocyte<br>Sedimentation Rate<br><i>(ESR)</i>                                               | Measured Value | Unit                                                               | Normal                      | Abnormal                    |                             |
|                                                                                                 |                |                                                                    |                             | No clinical significance    | Significant clinically      |
|                                                                                                 |                | <input type="checkbox"/> _1 mm/h <input type="checkbox"/> _2Other: | <input type="checkbox"/> _1 | <input type="checkbox"/> _2 | <input type="checkbox"/> _3 |

| <b>Erythrocyte Sedimentation Rate (ESR)</b> <input type="checkbox"/> _0Unexamined, reason _____ |                |                                                                    |                             |                             |                             |
|-------------------------------------------------------------------------------------------------|----------------|--------------------------------------------------------------------|-----------------------------|-----------------------------|-----------------------------|
| Date :  __ _ _ _ YEAR __ _ MONTH __ _ DAY                                                       |                |                                                                    |                             |                             | Normal range                |
| Number:  __ _ _ _                                                                               |                |                                                                    |                             |                             |                             |
| Item                                                                                            | Result         |                                                                    | Result Interpretation       |                             |                             |
| Erythrocyte<br>Sedimentation Rate<br><i>(ESR)</i>                                               | Measured Value | Unit                                                               | Normal                      | Abnormal                    |                             |
|                                                                                                 |                |                                                                    |                             | No clinical significance    | Significant clinically      |
|                                                                                                 |                | <input type="checkbox"/> _1 mm/h <input type="checkbox"/> _2Other: | <input type="checkbox"/> _1 | <input type="checkbox"/> _2 | <input type="checkbox"/> _3 |

|                                                                                                                                                                                                                                                   |                                   |
|---------------------------------------------------------------------------------------------------------------------------------------------------------------------------------------------------------------------------------------------------|-----------------------------------|
| Protocol Number: KY2020-29                                                                                                                                                                                                                        | <b>Attachment<br/>Out of Plan</b> |
| Center Number <input type="text"/>   <input type="text"/>   <input type="text"/> Subject Screening Number <input type="text"/>   <input type="text"/>   <input type="text"/>   <input type="text"/>   <input type="text"/>   <input type="text"/> |                                   |

| <b>TNF-α</b> <input type="checkbox"/> <sub>0</sub> Unexamined, reason _____                                                                                                          |                |                                             |                                              |                                                                                                                                                              |                                       |                                                                |
|--------------------------------------------------------------------------------------------------------------------------------------------------------------------------------------|----------------|---------------------------------------------|----------------------------------------------|--------------------------------------------------------------------------------------------------------------------------------------------------------------|---------------------------------------|----------------------------------------------------------------|
| Date: <input type="text"/>   <input type="text"/>   <input type="text"/>  YEAR  <input type="text"/>   <input type="text"/>  MONTH  <input type="text"/>   <input type="text"/>  DAY |                |                                             |                                              | Normal range Number: <input type="text"/>   <input type="text"/>   <input type="text"/>   <input type="text"/>   <input type="text"/>   <input type="text"/> |                                       |                                                                |
| Item                                                                                                                                                                                 | Result         |                                             |                                              | Result Interpretation                                                                                                                                        |                                       |                                                                |
| TNF-α                                                                                                                                                                                | Measured Value | Unit                                        |                                              | Normal                                                                                                                                                       | Abnormal                              |                                                                |
|                                                                                                                                                                                      |                | <input type="checkbox"/> <sub>1</sub> pg/mL | <input type="checkbox"/> <sub>2</sub> Other: |                                                                                                                                                              | <input type="checkbox"/> <sub>1</sub> | <input type="checkbox"/> <sub>2</sub> No clinical significance |
|                                                                                                                                                                                      |                |                                             |                                              |                                                                                                                                                              |                                       |                                                                |

| <b>TNF-α</b> <input type="checkbox"/> <sub>0</sub> Unexamined, reason _____                                                                                                          |                |                                             |                                              |                                                                                                                                                              |                                       |                                                                |
|--------------------------------------------------------------------------------------------------------------------------------------------------------------------------------------|----------------|---------------------------------------------|----------------------------------------------|--------------------------------------------------------------------------------------------------------------------------------------------------------------|---------------------------------------|----------------------------------------------------------------|
| Date: <input type="text"/>   <input type="text"/>   <input type="text"/>  YEAR  <input type="text"/>   <input type="text"/>  MONTH  <input type="text"/>   <input type="text"/>  DAY |                |                                             |                                              | Normal range Number: <input type="text"/>   <input type="text"/>   <input type="text"/>   <input type="text"/>   <input type="text"/>   <input type="text"/> |                                       |                                                                |
| Item                                                                                                                                                                                 | Result         |                                             |                                              | Result Interpretation                                                                                                                                        |                                       |                                                                |
| TNF-α                                                                                                                                                                                | Measured Value | Unit                                        |                                              | Normal                                                                                                                                                       | Abnormal                              |                                                                |
|                                                                                                                                                                                      |                | <input type="checkbox"/> <sub>1</sub> pg/mL | <input type="checkbox"/> <sub>2</sub> Other: |                                                                                                                                                              | <input type="checkbox"/> <sub>1</sub> | <input type="checkbox"/> <sub>2</sub> No clinical significance |
|                                                                                                                                                                                      |                |                                             |                                              |                                                                                                                                                              |                                       |                                                                |

| <b>TNF-α</b> <input type="checkbox"/> <sub>0</sub> Unexamined, reason _____                                                                                                          |                |                                             |                                              |                                                                                                                                                              |                                       |                                                                |
|--------------------------------------------------------------------------------------------------------------------------------------------------------------------------------------|----------------|---------------------------------------------|----------------------------------------------|--------------------------------------------------------------------------------------------------------------------------------------------------------------|---------------------------------------|----------------------------------------------------------------|
| Date: <input type="text"/>   <input type="text"/>   <input type="text"/>  YEAR  <input type="text"/>   <input type="text"/>  MONTH  <input type="text"/>   <input type="text"/>  DAY |                |                                             |                                              | Normal range Number: <input type="text"/>   <input type="text"/>   <input type="text"/>   <input type="text"/>   <input type="text"/>   <input type="text"/> |                                       |                                                                |
| Item                                                                                                                                                                                 | Result         |                                             |                                              | Result Interpretation                                                                                                                                        |                                       |                                                                |
| TNF-α                                                                                                                                                                                | Measured Value | Unit                                        |                                              | Normal                                                                                                                                                       | Abnormal                              |                                                                |
|                                                                                                                                                                                      |                | <input type="checkbox"/> <sub>1</sub> pg/mL | <input type="checkbox"/> <sub>2</sub> Other: |                                                                                                                                                              | <input type="checkbox"/> <sub>1</sub> | <input type="checkbox"/> <sub>2</sub> No clinical significance |
|                                                                                                                                                                                      |                |                                             |                                              |                                                                                                                                                              |                                       |                                                                |

| <b>TNF-α</b> <input type="checkbox"/> <sub>0</sub> Unexamined, reason _____                                                                                                          |                |                                             |                                              |                                                                                                                                                              |                                       |                                                                |
|--------------------------------------------------------------------------------------------------------------------------------------------------------------------------------------|----------------|---------------------------------------------|----------------------------------------------|--------------------------------------------------------------------------------------------------------------------------------------------------------------|---------------------------------------|----------------------------------------------------------------|
| Date: <input type="text"/>   <input type="text"/>   <input type="text"/>  YEAR  <input type="text"/>   <input type="text"/>  MONTH  <input type="text"/>   <input type="text"/>  DAY |                |                                             |                                              | Normal range Number: <input type="text"/>   <input type="text"/>   <input type="text"/>   <input type="text"/>   <input type="text"/>   <input type="text"/> |                                       |                                                                |
| Item                                                                                                                                                                                 | Result         |                                             |                                              | Result Interpretation                                                                                                                                        |                                       |                                                                |
| TNF-α                                                                                                                                                                                | Measured Value | Unit                                        |                                              | Normal                                                                                                                                                       | Abnormal                              |                                                                |
|                                                                                                                                                                                      |                | <input type="checkbox"/> <sub>1</sub> pg/mL | <input type="checkbox"/> <sub>2</sub> Other: |                                                                                                                                                              | <input type="checkbox"/> <sub>1</sub> | <input type="checkbox"/> <sub>2</sub> No clinical significance |
|                                                                                                                                                                                      |                |                                             |                                              |                                                                                                                                                              |                                       |                                                                |

| <b>TNF-α</b> <input type="checkbox"/> <sub>0</sub> Unexamined, reason _____                                                                                                          |                |                                             |                                              |                                                                                                                                                              |                                       |                                                                |
|--------------------------------------------------------------------------------------------------------------------------------------------------------------------------------------|----------------|---------------------------------------------|----------------------------------------------|--------------------------------------------------------------------------------------------------------------------------------------------------------------|---------------------------------------|----------------------------------------------------------------|
| Date: <input type="text"/>   <input type="text"/>   <input type="text"/>  YEAR  <input type="text"/>   <input type="text"/>  MONTH  <input type="text"/>   <input type="text"/>  DAY |                |                                             |                                              | Normal range Number: <input type="text"/>   <input type="text"/>   <input type="text"/>   <input type="text"/>   <input type="text"/>   <input type="text"/> |                                       |                                                                |
| Item                                                                                                                                                                                 | Result         |                                             |                                              | Result Interpretation                                                                                                                                        |                                       |                                                                |
| TNF-α                                                                                                                                                                                | Measured Value | Unit                                        |                                              | Normal                                                                                                                                                       | Abnormal                              |                                                                |
|                                                                                                                                                                                      |                | <input type="checkbox"/> <sub>1</sub> pg/mL | <input type="checkbox"/> <sub>2</sub> Other: |                                                                                                                                                              | <input type="checkbox"/> <sub>1</sub> | <input type="checkbox"/> <sub>2</sub> No clinical significance |
|                                                                                                                                                                                      |                |                                             |                                              |                                                                                                                                                              |                                       |                                                                |

|                                    |                                   |
|------------------------------------|-----------------------------------|
| Protocol Number: KY2020-29         | <b>Attachment<br/>Out of Plan</b> |
| Center Number <input type="text"/> |                                   |

| <b>IL-6</b> <input type="checkbox"/> Unexamined, reason _____                                                                                                                        |                |                                             |                                              |                                           |                                       |                                       |
|--------------------------------------------------------------------------------------------------------------------------------------------------------------------------------------|----------------|---------------------------------------------|----------------------------------------------|-------------------------------------------|---------------------------------------|---------------------------------------|
| Date: <input type="text"/>   <input type="text"/>   <input type="text"/>  YEAR  <input type="text"/>   <input type="text"/>  MONTH  <input type="text"/>   <input type="text"/>  DAY |                |                                             |                                              | Normal range Number: <input type="text"/> |                                       |                                       |
| Item                                                                                                                                                                                 | Result         |                                             |                                              | Result Interpretation                     |                                       |                                       |
| IL-6                                                                                                                                                                                 | Measured Value | Unit                                        |                                              | Normal                                    | Abnormal                              |                                       |
|                                                                                                                                                                                      |                | <input type="checkbox"/> <sub>1</sub> pg/mL | <input type="checkbox"/> <sub>2</sub> Other: |                                           | <input type="checkbox"/> <sub>1</sub> | <input type="checkbox"/> <sub>2</sub> |
|                                                                                                                                                                                      |                |                                             |                                              |                                           |                                       |                                       |

| <b>IL-6</b> <input type="checkbox"/> Unexamined, reason _____                                                                                                                        |                |                                             |                                              |                                           |                                       |                                       |
|--------------------------------------------------------------------------------------------------------------------------------------------------------------------------------------|----------------|---------------------------------------------|----------------------------------------------|-------------------------------------------|---------------------------------------|---------------------------------------|
| Date: <input type="text"/>   <input type="text"/>   <input type="text"/>  YEAR  <input type="text"/>   <input type="text"/>  MONTH  <input type="text"/>   <input type="text"/>  DAY |                |                                             |                                              | Normal range Number: <input type="text"/> |                                       |                                       |
| Item                                                                                                                                                                                 | Result         |                                             |                                              | Result Interpretation                     |                                       |                                       |
| IL-6                                                                                                                                                                                 | Measured Value | Unit                                        |                                              | Normal                                    | Abnormal                              |                                       |
|                                                                                                                                                                                      |                | <input type="checkbox"/> <sub>1</sub> pg/mL | <input type="checkbox"/> <sub>2</sub> Other: |                                           | <input type="checkbox"/> <sub>1</sub> | <input type="checkbox"/> <sub>2</sub> |
|                                                                                                                                                                                      |                |                                             |                                              |                                           |                                       |                                       |

| <b>IL-6</b> <input type="checkbox"/> Unexamined, reason _____                                                                                                                        |                |                                             |                                              |                                           |                                       |                                       |
|--------------------------------------------------------------------------------------------------------------------------------------------------------------------------------------|----------------|---------------------------------------------|----------------------------------------------|-------------------------------------------|---------------------------------------|---------------------------------------|
| Date: <input type="text"/>   <input type="text"/>   <input type="text"/>  YEAR  <input type="text"/>   <input type="text"/>  MONTH  <input type="text"/>   <input type="text"/>  DAY |                |                                             |                                              | Normal range Number: <input type="text"/> |                                       |                                       |
| Item                                                                                                                                                                                 | Result         |                                             |                                              | Result Interpretation                     |                                       |                                       |
| IL-6                                                                                                                                                                                 | Measured Value | Unit                                        |                                              | Normal                                    | Abnormal                              |                                       |
|                                                                                                                                                                                      |                | <input type="checkbox"/> <sub>1</sub> pg/mL | <input type="checkbox"/> <sub>2</sub> Other: |                                           | <input type="checkbox"/> <sub>1</sub> | <input type="checkbox"/> <sub>2</sub> |
|                                                                                                                                                                                      |                |                                             |                                              |                                           |                                       |                                       |

| <b>IL-6</b> <input type="checkbox"/> Unexamined, reason _____                                                                                                                        |                |                                             |                                              |                                           |                                       |                                       |
|--------------------------------------------------------------------------------------------------------------------------------------------------------------------------------------|----------------|---------------------------------------------|----------------------------------------------|-------------------------------------------|---------------------------------------|---------------------------------------|
| Date: <input type="text"/>   <input type="text"/>   <input type="text"/>  YEAR  <input type="text"/>   <input type="text"/>  MONTH  <input type="text"/>   <input type="text"/>  DAY |                |                                             |                                              | Normal range Number: <input type="text"/> |                                       |                                       |
| Item                                                                                                                                                                                 | Result         |                                             |                                              | Result Interpretation                     |                                       |                                       |
| IL-6                                                                                                                                                                                 | Measured Value | Unit                                        |                                              | Normal                                    | Abnormal                              |                                       |
|                                                                                                                                                                                      |                | <input type="checkbox"/> <sub>1</sub> pg/mL | <input type="checkbox"/> <sub>2</sub> Other: |                                           | <input type="checkbox"/> <sub>1</sub> | <input type="checkbox"/> <sub>2</sub> |
|                                                                                                                                                                                      |                |                                             |                                              |                                           |                                       |                                       |

| <b>IL-6</b> <input type="checkbox"/> Unexamined, reason _____                                                                                                                        |                |                                             |                                              |                                           |                                       |                                       |
|--------------------------------------------------------------------------------------------------------------------------------------------------------------------------------------|----------------|---------------------------------------------|----------------------------------------------|-------------------------------------------|---------------------------------------|---------------------------------------|
| Date: <input type="text"/>   <input type="text"/>   <input type="text"/>  YEAR  <input type="text"/>   <input type="text"/>  MONTH  <input type="text"/>   <input type="text"/>  DAY |                |                                             |                                              | Normal range Number: <input type="text"/> |                                       |                                       |
| Item                                                                                                                                                                                 | Result         |                                             |                                              | Result Interpretation                     |                                       |                                       |
| IL-6                                                                                                                                                                                 | Measured Value | Unit                                        |                                              | Normal                                    | Abnormal                              |                                       |
|                                                                                                                                                                                      |                | <input type="checkbox"/> <sub>1</sub> pg/mL | <input type="checkbox"/> <sub>2</sub> Other: |                                           | <input type="checkbox"/> <sub>1</sub> | <input type="checkbox"/> <sub>2</sub> |
|                                                                                                                                                                                      |                |                                             |                                              |                                           |                                       |                                       |

|                                                                     |                                   |
|---------------------------------------------------------------------|-----------------------------------|
| Protocol Number: KY2020-29                                          | <b>Attachment<br/>Out of Plan</b> |
| Center Number  __ __       Subject Screening Number  __ __ __ __ __ |                                   |

|                                                                                                                                 |
|---------------------------------------------------------------------------------------------------------------------------------|
| <b>Urine or serum HCG (Only applicable to women of childbearing age)</b> <input type="checkbox"/> _0 Unexamined,<br>reason_____ |
| <input type="checkbox"/> _1 Not Applicable (Man or woman who isn't able to reproduce)                                           |
| Date:  __ __ __ __ YEAR __ __ MONTH __ __ DAY                                                                                   |
| Sample: <input type="checkbox"/> _1 Blood <input type="checkbox"/> _2 Urine                                                     |
| Result: <input type="checkbox"/> _1 Negative <input type="checkbox"/> _2 Positive                                               |

|                                                                                                                                 |
|---------------------------------------------------------------------------------------------------------------------------------|
| <b>Urine or serum HCG (Only applicable to women of childbearing age)</b> <input type="checkbox"/> _0 Unexamined,<br>reason_____ |
| <input type="checkbox"/> _1 Not Applicable (Man or woman who isn't able to reproduce)                                           |
| Date:  __ __ __ __ YEAR __ __ MONTH __ __ DAY                                                                                   |
| Sample: <input type="checkbox"/> _1 Blood <input type="checkbox"/> _2 Urine                                                     |
| Result: <input type="checkbox"/> _1 Negative <input type="checkbox"/> _2 Positive                                               |

|                                                                                                                                 |
|---------------------------------------------------------------------------------------------------------------------------------|
| <b>Urine or serum HCG (Only applicable to women of childbearing age)</b> <input type="checkbox"/> _0 Unexamined,<br>reason_____ |
| <input type="checkbox"/> _1 Not Applicable (Man or woman who isn't able to reproduce)                                           |
| Date:  __ __ __ __ YEAR __ __ MONTH __ __ DAY                                                                                   |
| Sample: <input type="checkbox"/> _1 Blood <input type="checkbox"/> _2 Urine                                                     |
| Result: <input type="checkbox"/> _1 Negative <input type="checkbox"/> _2 Positive                                               |

|                                                                                                                                 |
|---------------------------------------------------------------------------------------------------------------------------------|
| <b>Urine or serum HCG (Only applicable to women of childbearing age)</b> <input type="checkbox"/> _0 Unexamined,<br>reason_____ |
| <input type="checkbox"/> _1 Not Applicable (Man or woman who isn't able to reproduce)                                           |
| Date:  __ __ __ __ YEAR __ __ MONTH __ __ DAY                                                                                   |
| Sample: <input type="checkbox"/> _1 Blood <input type="checkbox"/> _2 Urine                                                     |
| Result: <input type="checkbox"/> _1 Negative <input type="checkbox"/> _2 Positive                                               |

|                                                                                                                                 |
|---------------------------------------------------------------------------------------------------------------------------------|
| <b>Urine or serum HCG (Only applicable to women of childbearing age)</b> <input type="checkbox"/> _0 Unexamined,<br>reason_____ |
| <input type="checkbox"/> _1 Not Applicable (Man or woman who isn't able to reproduce)                                           |
| Date:  __ __ __ __ YEAR __ __ MONTH __ __ DAY                                                                                   |

|                                                                                 |                                                  |                                   |
|---------------------------------------------------------------------------------|--------------------------------------------------|-----------------------------------|
| Protocol Number: KY2020-29                                                      |                                                  | <b>Attachment<br/>Out of Plan</b> |
| Center Number [ ] [ ]                                                           | Subject Screening Number [ ] [ ] [ ] [ ] [ ] [ ] |                                   |
| Sample: <input type="checkbox"/> 1 Blood <input type="checkbox"/> 2 Urine       |                                                  |                                   |
| Result: <input type="checkbox"/> 1 Negative <input type="checkbox"/> 2 Positive |                                                  |                                   |

|                            |                                      |                                   |
|----------------------------|--------------------------------------|-----------------------------------|
| Protocol Number: KY2020-29 |                                      | <b>Attachment<br/>Out of Plan</b> |
| Center Number  __ _        | Subject Screening Number  __ _ _ _ _ |                                   |

|                                                                                                                                                                      |
|----------------------------------------------------------------------------------------------------------------------------------------------------------------------|
| <b>Routine 12 Leads Electrocardiogram</b> <input type="checkbox"/> _0 Unexamined, reason _____                                                                       |
| Date:  __ _ _ _ _ YEAR __ _ MONTH __ _ DAY                                                                                                                           |
| Result: <input type="checkbox"/> _1 Normal <input type="checkbox"/> _2 Abnormal No clinical significance <input type="checkbox"/> _3 Abnormal Significant clinically |
| If "Abnormal", please describe: _____<br>_____                                                                                                                       |

|                                                                                                                                                                      |
|----------------------------------------------------------------------------------------------------------------------------------------------------------------------|
| <b>Routine 12 Leads Electrocardiogram</b> <input type="checkbox"/> _0 Unexamined, reason _____                                                                       |
| Date:  __ _ _ _ _ YEAR __ _ MONTH __ _ DAY                                                                                                                           |
| Result: <input type="checkbox"/> _1 Normal <input type="checkbox"/> _2 Abnormal No clinical significance <input type="checkbox"/> _3 Abnormal Significant clinically |
| If "Abnormal", please describe: _____<br>_____                                                                                                                       |

|                                                                                                                                                                      |
|----------------------------------------------------------------------------------------------------------------------------------------------------------------------|
| <b>Routine 12 Leads Electrocardiogram</b> <input type="checkbox"/> _0 Unexamined, reason _____                                                                       |
| Date:  __ _ _ _ _ YEAR __ _ MONTH __ _ DAY                                                                                                                           |
| Result: <input type="checkbox"/> _1 Normal <input type="checkbox"/> _2 Abnormal No clinical significance <input type="checkbox"/> _3 Abnormal Significant clinically |
| If "Abnormal", please describe: _____<br>_____                                                                                                                       |

|                                                                                                                                                                      |
|----------------------------------------------------------------------------------------------------------------------------------------------------------------------|
| <b>Routine 12 Leads Electrocardiogram</b> <input type="checkbox"/> _0 Unexamined, reason _____                                                                       |
| Date:  __ _ _ _ _ YEAR __ _ MONTH __ _ DAY                                                                                                                           |
| Result: <input type="checkbox"/> _1 Normal <input type="checkbox"/> _2 Abnormal No clinical significance <input type="checkbox"/> _3 Abnormal Significant clinically |
| If "Abnormal", please describe: _____<br>_____                                                                                                                       |

|                                                                                                                                                                      |
|----------------------------------------------------------------------------------------------------------------------------------------------------------------------|
| <b>Routine 12 Leads Electrocardiogram</b> <input type="checkbox"/> _0 Unexamined, reason _____                                                                       |
| Date:  __ _ _ _ _ YEAR __ _ MONTH __ _ DAY                                                                                                                           |
| Result: <input type="checkbox"/> _1 Normal <input type="checkbox"/> _2 Abnormal No clinical significance <input type="checkbox"/> _3 Abnormal Significant clinically |
| If "Abnormal", please describe: _____<br>_____                                                                                                                       |

|                                                                                                                                                                      |
|----------------------------------------------------------------------------------------------------------------------------------------------------------------------|
| <b>Routine 12 Leads Electrocardiogram</b> <input type="checkbox"/> _0 Unexamined, reason _____                                                                       |
| Date:  __ _ _ _ _ YEAR __ _ MONTH __ _ DAY                                                                                                                           |
| Result: <input type="checkbox"/> _1 Normal <input type="checkbox"/> _2 Abnormal No clinical significance <input type="checkbox"/> _3 Abnormal Significant clinically |
| If "Abnormal", please describe: _____<br>_____                                                                                                                       |



|                            |                                 |                                   |
|----------------------------|---------------------------------|-----------------------------------|
| Protocol Number: KY2020-29 |                                 | <b>Attachment<br/>Out of Plan</b> |
| Center Number  __          | Subject Screening Number  _____ |                                   |

|                                                                                                                                                                                     |                    |
|-------------------------------------------------------------------------------------------------------------------------------------------------------------------------------------|--------------------|
| <b>Nucleic Acid Test of 2019-nCov</b> <input type="checkbox"/> _0 Unexamined, reason _____<br><input type="checkbox"/> _1 Not Applicable                                            |                    |
| Sampling Part: <input type="checkbox"/> _1 Upper respiratory tract <input type="checkbox"/> _2 Lower respiratory tract                                                              |                    |
| Date:  __ _ _ _ YEAR __ _ MONTH __ _ DAY                                                                                                                                            | Date:  __ _ : __ _ |
| Result: <input type="checkbox"/> _1 Negative <input type="checkbox"/> _2 Positive <input type="checkbox"/> _3 Unidentified <input type="checkbox"/> _4 Other, please describe _____ |                    |

|                                                                                                                                                                                     |                    |
|-------------------------------------------------------------------------------------------------------------------------------------------------------------------------------------|--------------------|
| <b>Nucleic Acid Test of 2019-nCov</b> <input type="checkbox"/> _0 Unexamined, reason _____<br><input type="checkbox"/> _1 Not Applicable                                            |                    |
| Sampling Part: <input type="checkbox"/> _1 Upper respiratory tract <input type="checkbox"/> _2 Lower respiratory tract                                                              |                    |
| Date:  __ _ _ _ YEAR __ _ MONTH __ _ DAY                                                                                                                                            | Date:  __ _ : __ _ |
| Result: <input type="checkbox"/> _1 Negative <input type="checkbox"/> _2 Positive <input type="checkbox"/> _3 Unidentified <input type="checkbox"/> _4 Other, please describe _____ |                    |

|                                                                                                                                                                                     |                    |
|-------------------------------------------------------------------------------------------------------------------------------------------------------------------------------------|--------------------|
| <b>Nucleic Acid Test of 2019-nCov</b> <input type="checkbox"/> _0 Unexamined, reason _____<br><input type="checkbox"/> _1 Not Applicable                                            |                    |
| Sampling Part: <input type="checkbox"/> _1 Upper respiratory tract <input type="checkbox"/> _2 Lower respiratory tract                                                              |                    |
| Date:  __ _ _ _ YEAR __ _ MONTH __ _ DAY                                                                                                                                            | Date:  __ _ : __ _ |
| Result: <input type="checkbox"/> _1 Negative <input type="checkbox"/> _2 Positive <input type="checkbox"/> _3 Unidentified <input type="checkbox"/> _4 Other, please describe _____ |                    |

|                                                                                                                                                                                     |                    |
|-------------------------------------------------------------------------------------------------------------------------------------------------------------------------------------|--------------------|
| <b>Nucleic Acid Test of 2019-nCov</b> <input type="checkbox"/> _0 Unexamined, reason _____<br><input type="checkbox"/> _1 Not Applicable                                            |                    |
| Sampling Part: <input type="checkbox"/> _1 Upper respiratory tract <input type="checkbox"/> _2 Lower respiratory tract                                                              |                    |
| Date:  __ _ _ _ YEAR __ _ MONTH __ _ DAY                                                                                                                                            | Date:  __ _ : __ _ |
| Result: <input type="checkbox"/> _1 Negative <input type="checkbox"/> _2 Positive <input type="checkbox"/> _3 Unidentified <input type="checkbox"/> _4 Other, please describe _____ |                    |

|                                                                                                                                                                                     |                    |
|-------------------------------------------------------------------------------------------------------------------------------------------------------------------------------------|--------------------|
| <b>Nucleic Acid Test of 2019-nCov</b> <input type="checkbox"/> _0 Unexamined, reason _____<br><input type="checkbox"/> _1 Not Applicable                                            |                    |
| Sampling Part: <input type="checkbox"/> _1 Upper respiratory tract <input type="checkbox"/> _2 Lower respiratory tract                                                              |                    |
| Date:  __ _ _ _ YEAR __ _ MONTH __ _ DAY                                                                                                                                            | Date:  __ _ : __ _ |
| Result: <input type="checkbox"/> _1 Negative <input type="checkbox"/> _2 Positive <input type="checkbox"/> _3 Unidentified <input type="checkbox"/> _4 Other, please describe _____ |                    |

|                            |                                      |                                   |
|----------------------------|--------------------------------------|-----------------------------------|
| Protocol Number: KY2020-29 |                                      | <b>Attachment<br/>Out of Plan</b> |
| Center Number  __ _        | Subject Screening Number  __ _ _ _ _ |                                   |

|                                                                                                              |
|--------------------------------------------------------------------------------------------------------------|
| <b>Pulse oxygen saturation (without oxygen inhalation )</b> <input type="checkbox"/> Unexamined, reason_____ |
| Date:  __ _ _ _ YEAR __ _ MONTH __ _ DAY                                                                     |
| Measured Value: _____% (Rest state)                                                                          |

|                                                                                                              |
|--------------------------------------------------------------------------------------------------------------|
| <b>Pulse oxygen saturation (without oxygen inhalation )</b> <input type="checkbox"/> Unexamined, reason_____ |
| Date:  __ _ _ _ YEAR __ _ MONTH __ _ DAY                                                                     |
| Measured Value: _____% (Rest state)                                                                          |

|                                                                                                              |
|--------------------------------------------------------------------------------------------------------------|
| <b>Pulse oxygen saturation (without oxygen inhalation )</b> <input type="checkbox"/> Unexamined, reason_____ |
| Date:  __ _ _ _ YEAR __ _ MONTH __ _ DAY                                                                     |
| Measured Value: _____% (Rest state)                                                                          |

|                                                                                                              |
|--------------------------------------------------------------------------------------------------------------|
| <b>Pulse oxygen saturation (without oxygen inhalation )</b> <input type="checkbox"/> Unexamined, reason_____ |
| Date:  __ _ _ _ YEAR __ _ MONTH __ _ DAY                                                                     |
| Measured Value: _____% (Rest state)                                                                          |

|                                                                                                              |
|--------------------------------------------------------------------------------------------------------------|
| <b>Pulse oxygen saturation (without oxygen inhalation )</b> <input type="checkbox"/> Unexamined, reason_____ |
| Date:  __ _ _ _ YEAR __ _ MONTH __ _ DAY                                                                     |
| Measured Value: _____% (Rest state)                                                                          |

|                                                                                                              |
|--------------------------------------------------------------------------------------------------------------|
| <b>Pulse oxygen saturation (without oxygen inhalation )</b> <input type="checkbox"/> Unexamined, reason_____ |
| Date:  __ _ _ _ YEAR __ _ MONTH __ _ DAY                                                                     |
| Measured Value: _____% (Rest state)                                                                          |

|                                                                                                              |
|--------------------------------------------------------------------------------------------------------------|
| <b>Pulse oxygen saturation (without oxygen inhalation )</b> <input type="checkbox"/> Unexamined, reason_____ |
| Date:  __ _ _ _ YEAR __ _ MONTH __ _ DAY                                                                     |
| Measured Value: _____% (Rest state)                                                                          |

|                                                                                 |                                   |
|---------------------------------------------------------------------------------|-----------------------------------|
| Protocol Number: KY2020-29                                                      | <b>Attachment<br/>Out of Plan</b> |
| Center Number  __   __    Subject Screening Number  __   __   __   __   __   __ |                                   |

|                                                                                                      |
|------------------------------------------------------------------------------------------------------|
| <b>Whether develops into severe/critical type</b> <input type="checkbox"/> No evaluation             |
| Date  __   __   __   __   YEAR __   __   MONTH __   __   DAY                                         |
| Whether develops into severe/critical type: <input type="checkbox"/> NO <input type="checkbox"/> YES |
| Date of developing into severe/critical type:  __   __   __   YEAR __   __   MONTH __   __   DAY     |

|                                                                                                      |
|------------------------------------------------------------------------------------------------------|
| <b>Whether develops into severe/critical type</b> <input type="checkbox"/> No evaluation             |
| Date  __   __   __   __   YEAR __   __   MONTH __   __   DAY                                         |
| Whether develops into severe/critical type: <input type="checkbox"/> NO <input type="checkbox"/> YES |
| Date of developing into severe/critical type:  __   __   __   YEAR __   __   MONTH __   __   DAY     |

|                                                                                                      |
|------------------------------------------------------------------------------------------------------|
| <b>Whether develops into severe/critical type</b> <input type="checkbox"/> No evaluation             |
| Date  __   __   __   __   YEAR __   __   MONTH __   __   DAY                                         |
| Whether develops into severe/critical type: <input type="checkbox"/> NO <input type="checkbox"/> YES |
| Date of developing into severe/critical type:  __   __   __   YEAR __   __   MONTH __   __   DAY     |

|                                                                                                      |
|------------------------------------------------------------------------------------------------------|
| <b>Whether develops into severe/critical type</b> <input type="checkbox"/> No evaluation             |
| Date  __   __   __   __   YEAR __   __   MONTH __   __   DAY                                         |
| Whether develops into severe/critical type: <input type="checkbox"/> NO <input type="checkbox"/> YES |
| Date of developing into severe/critical type:  __   __   __   YEAR __   __   MONTH __   __   DAY     |

|                                                                                                      |
|------------------------------------------------------------------------------------------------------|
| <b>Whether develops into severe/critical type</b> <input type="checkbox"/> No evaluation             |
| Date  __   __   __   __   YEAR __   __   MONTH __   __   DAY                                         |
| Whether develops into severe/critical type: <input type="checkbox"/> NO <input type="checkbox"/> YES |
| Date of developing into severe/critical type:  __   __   __   YEAR __   __   MONTH __   __   DAY     |

|                                                                                                      |
|------------------------------------------------------------------------------------------------------|
| <b>Whether develops into severe/critical type</b> <input type="checkbox"/> No evaluation             |
| Date  __   __   __   __   YEAR __   __   MONTH __   __   DAY                                         |
| Whether develops into severe/critical type: <input type="checkbox"/> NO <input type="checkbox"/> YES |
| Date of developing into severe/critical type:  __   __   __   YEAR __   __   MONTH __   __   DAY     |

|                                                                        |                                   |
|------------------------------------------------------------------------|-----------------------------------|
| Protocol Number: KY2020-29                                             | <b>Attachment<br/>Out of Plan</b> |
| Center Number  __ __       Subject Screening Number  __ __ __ __ __ __ |                                   |

|                                                                                                                                                                                                                                                                   |
|-------------------------------------------------------------------------------------------------------------------------------------------------------------------------------------------------------------------------------------------------------------------|
| <b>Chest CT</b> <input type="checkbox"/> _0 Unexamined, reason _____                                                                                                                                                                                              |
| Date:  __ __ __ __ __ __ YEAR __ __ MONTH __ __ DAY                                                                                                                                                                                                               |
| Result: <input type="checkbox"/> _1 Normal <input type="checkbox"/> _2 Abnormal, no clinical significance <input type="checkbox"/> _3 Abnormal, significant clinically <input type="checkbox"/> _4 _____                                                          |
| If abnormal, please describe _____                                                                                                                                                                                                                                |
| Whether chest CT lesion absorbed ≥50% than baseline??<br><input type="checkbox"/> _0 NO <input type="checkbox"/> _1 YES <input type="checkbox"/> _2 Unidentified <input type="checkbox"/> _3 Unknown<br><input type="checkbox"/> _4 Other, please describe: _____ |

|                                                                                                                                                                                                                                                                   |
|-------------------------------------------------------------------------------------------------------------------------------------------------------------------------------------------------------------------------------------------------------------------|
| <b>Chest CT</b> <input type="checkbox"/> _0 Unexamined, reason _____                                                                                                                                                                                              |
| Date:  __ __ __ __ __ __ YEAR __ __ MONTH __ __ DAY                                                                                                                                                                                                               |
| Result: <input type="checkbox"/> _1 Normal <input type="checkbox"/> _2 Abnormal, no clinical significance <input type="checkbox"/> _3 Abnormal, significant clinically <input type="checkbox"/> _4 _____                                                          |
| If abnormal, please describe _____                                                                                                                                                                                                                                |
| Whether chest CT lesion absorbed ≥50% than baseline??<br><input type="checkbox"/> _0 NO <input type="checkbox"/> _1 YES <input type="checkbox"/> _2 Unidentified <input type="checkbox"/> _3 Unknown<br><input type="checkbox"/> _4 Other, please describe: _____ |

|                                                                                                                                                                                                                                                                   |
|-------------------------------------------------------------------------------------------------------------------------------------------------------------------------------------------------------------------------------------------------------------------|
| <b>Chest CT</b> <input type="checkbox"/> _0 Unexamined, reason _____                                                                                                                                                                                              |
| Date:  __ __ __ __ __ __ YEAR __ __ MONTH __ __ DAY                                                                                                                                                                                                               |
| Result: <input type="checkbox"/> _1 Normal <input type="checkbox"/> _2 Abnormal, no clinical significance <input type="checkbox"/> _3 Abnormal, significant clinically <input type="checkbox"/> _4 _____                                                          |
| If abnormal, please describe _____                                                                                                                                                                                                                                |
| Whether chest CT lesion absorbed ≥50% than baseline??<br><input type="checkbox"/> _0 NO <input type="checkbox"/> _1 YES <input type="checkbox"/> _2 Unidentified <input type="checkbox"/> _3 Unknown<br><input type="checkbox"/> _4 Other, please describe: _____ |

|                            |                                                  |                                   |
|----------------------------|--------------------------------------------------|-----------------------------------|
| Protocol Number: KY2020-29 |                                                  | <b>Attachment<br/>Out of Plan</b> |
| Center Number [ ] [ ]      | Subject Screening Number [ ] [ ] [ ] [ ] [ ] [ ] |                                   |

| <b>Arterial Blood Gas Analysis</b> <input type="checkbox"/> Unexamined, reason _____                |                |                                                                            |                            |                            |                            |                            |
|-----------------------------------------------------------------------------------------------------|----------------|----------------------------------------------------------------------------|----------------------------|----------------------------|----------------------------|----------------------------|
| Inhalation oxygen or not? <input type="checkbox"/> No <input type="checkbox"/> Yes, (FiO2): _____ % |                |                                                                            |                            |                            |                            |                            |
| Date: [ ] [ ] [ ] [ ]   YEAR   [ ] [ ]   MONTH   [ ] [ ]   DAY                                      |                |                                                                            |                            |                            |                            |                            |
| Item                                                                                                | Result         |                                                                            | Result Interpretation      |                            |                            | Unexamined                 |
|                                                                                                     | Measured Value | Unit                                                                       | Normal                     | Abnormal                   |                            |                            |
|                                                                                                     |                |                                                                            |                            | No clinical significance   | Significant clinically     |                            |
| Arterial partial pressure of oxygen (PaO2)                                                          |                | <input type="checkbox"/> 1 mmHg <input type="checkbox"/> 2<br>Other: _____ | <input type="checkbox"/> 1 | <input type="checkbox"/> 2 | <input type="checkbox"/> 3 | <input type="checkbox"/> 0 |
| Oxygen saturation (SaO2)                                                                            |                | <input type="checkbox"/> 1 % <input type="checkbox"/> 2 Other: _____       | <input type="checkbox"/> 1 | <input type="checkbox"/> 2 | <input type="checkbox"/> 3 | <input type="checkbox"/> 0 |

| <b>Arterial Blood Gas Analysis</b> <input type="checkbox"/> Unexamined, reason _____              |                |                                                                            |                            |                            |                            |                            |
|---------------------------------------------------------------------------------------------------|----------------|----------------------------------------------------------------------------|----------------------------|----------------------------|----------------------------|----------------------------|
| Inhalate oxygen or not? <input type="checkbox"/> No <input type="checkbox"/> Yes, (FiO2): _____ % |                |                                                                            |                            |                            |                            |                            |
| Date: [ ] [ ] [ ] [ ]   YEAR   [ ] [ ]   MONTH   [ ] [ ]   DAY                                    |                |                                                                            |                            |                            |                            |                            |
| Item                                                                                              | Result         |                                                                            | Result Interpretation      |                            |                            | Unexamined                 |
|                                                                                                   | Measured Value | Unit                                                                       | Normal                     | Abnormal                   |                            |                            |
|                                                                                                   |                |                                                                            |                            | No clinical significance   | Significant clinically     |                            |
| Arterial partial pressure of oxygen (PaO2)                                                        |                | <input type="checkbox"/> 1 mmHg <input type="checkbox"/> 2<br>Other: _____ | <input type="checkbox"/> 1 | <input type="checkbox"/> 2 | <input type="checkbox"/> 3 | <input type="checkbox"/> 0 |
| Oxygen saturation (SaO2)                                                                          |                | <input type="checkbox"/> 1 % <input type="checkbox"/> 2 Other: _____       | <input type="checkbox"/> 1 | <input type="checkbox"/> 2 | <input type="checkbox"/> 3 | <input type="checkbox"/> 0 |

|                                                      |                                   |
|------------------------------------------------------|-----------------------------------|
| Protocol Number: KY2020-29                           | <b>Attachment<br/>Out of Plan</b> |
| Center Number  __    Subject Screening Number  _____ |                                   |

|                                                                             |                                                                                                                                                                                                                                                                                                                                                                                                                                                                                                                                                         |
|-----------------------------------------------------------------------------|---------------------------------------------------------------------------------------------------------------------------------------------------------------------------------------------------------------------------------------------------------------------------------------------------------------------------------------------------------------------------------------------------------------------------------------------------------------------------------------------------------------------------------------------------------|
| <b>Clinical status</b> <input type="checkbox"/> No evaluation, reason _____ |                                                                                                                                                                                                                                                                                                                                                                                                                                                                                                                                                         |
| Date:                                                                       | __ __ __ YEAR __ __ MONTH __ __ DAY                                                                                                                                                                                                                                                                                                                                                                                                                                                                                                                     |
| Result                                                                      | <input type="checkbox"/> Level 1: discharge<br><input type="checkbox"/> Level 2: hospitalization, oxygen therapy is not required<br><input type="checkbox"/> Level 3: hospitalization, require oxygen therapy<br><input type="checkbox"/> Level 4: ICU/ hospitalization, require noninvasive ventilation (NIV)/<br>High flow nasal catheter oxygen therapy (HFNC)<br><input type="checkbox"/> Level 5: ICU, require extracorporeal membrane oxygenation<br>(ECMO)and/or invasive mechanical ventilation(IMV)<br><input type="checkbox"/> Level 6: Death |

|                                                                             |                                                                                                                                                                                                                                                                                                                                                                                                                                                                                                                                                         |
|-----------------------------------------------------------------------------|---------------------------------------------------------------------------------------------------------------------------------------------------------------------------------------------------------------------------------------------------------------------------------------------------------------------------------------------------------------------------------------------------------------------------------------------------------------------------------------------------------------------------------------------------------|
| <b>Clinical status</b> <input type="checkbox"/> No evaluation, reason _____ |                                                                                                                                                                                                                                                                                                                                                                                                                                                                                                                                                         |
| Date:                                                                       | __ __ __ YEAR __ __ MONTH __ __ DAY                                                                                                                                                                                                                                                                                                                                                                                                                                                                                                                     |
| Result                                                                      | <input type="checkbox"/> Level 1: discharge<br><input type="checkbox"/> Level 2: hospitalization, oxygen therapy is not required<br><input type="checkbox"/> Level 3: hospitalization, require oxygen therapy<br><input type="checkbox"/> Level 4: ICU/ hospitalization, require noninvasive ventilation (NIV)/<br>High flow nasal catheter oxygen therapy (HFNC)<br><input type="checkbox"/> Level 5: ICU, require extracorporeal membrane oxygenation<br>(ECMO)and/or invasive mechanical ventilation(IMV)<br><input type="checkbox"/> Level 6: Death |

|                                                                             |                                                                                                                                                                                                                                                                                                                                                                                                                                                                                                                                                         |
|-----------------------------------------------------------------------------|---------------------------------------------------------------------------------------------------------------------------------------------------------------------------------------------------------------------------------------------------------------------------------------------------------------------------------------------------------------------------------------------------------------------------------------------------------------------------------------------------------------------------------------------------------|
| <b>Clinical status</b> <input type="checkbox"/> No evaluation, reason _____ |                                                                                                                                                                                                                                                                                                                                                                                                                                                                                                                                                         |
| Date:                                                                       | __ __ __ YEAR __ __ MONTH __ __ DAY                                                                                                                                                                                                                                                                                                                                                                                                                                                                                                                     |
| Result                                                                      | <input type="checkbox"/> Level 1: discharge<br><input type="checkbox"/> Level 2: hospitalization, oxygen therapy is not required<br><input type="checkbox"/> Level 3: hospitalization, require oxygen therapy<br><input type="checkbox"/> Level 4: ICU/ hospitalization, require noninvasive ventilation (NIV)/<br>High flow nasal catheter oxygen therapy (HFNC)<br><input type="checkbox"/> Level 5: ICU, require extracorporeal membrane oxygenation<br>(ECMO)and/or invasive mechanical ventilation(IMV)<br><input type="checkbox"/> Level 6: Death |

|                                                                                     |                                   |
|-------------------------------------------------------------------------------------|-----------------------------------|
| Protocol Number: KY2020-29                                                          | <b>Attachment<br/>Out of Plan</b> |
| Center Number [ ] [ ]      Subject Screening Number [ ] [ ] [ ] [ ] [ ] [ ] [ ] [ ] |                                   |

|                                                                                    |                                                     |
|------------------------------------------------------------------------------------|-----------------------------------------------------|
| Signment of the Informed Consent Form (ICF)                                        |                                                     |
| Date of signing the Informed Consent                                               | [ ] [ ] [ ] [ ]  YEAR  [ ] [ ]  MONTH  [ ] [ ]  DAY |
| Version number of the Informed Consent                                             | _____                                               |
| The version number of the protocol shall apply when the Informed Consent is signed | __ _ . _                                            |

|                                                                                    |                                                     |
|------------------------------------------------------------------------------------|-----------------------------------------------------|
| Signment of the Informed Consent Form (ICF)                                        |                                                     |
| Date of signing the Informed Consent                                               | [ ] [ ] [ ] [ ]  YEAR  [ ] [ ]  MONTH  [ ] [ ]  DAY |
| Version number of the Informed Consent                                             | _____                                               |
| The version number of the protocol shall apply when the Informed Consent is signed | __ _ . _                                            |

|                                                                                    |                                                     |
|------------------------------------------------------------------------------------|-----------------------------------------------------|
| Signment of the Informed Consent Form (ICF)                                        |                                                     |
| Date of signing the Informed Consent                                               | [ ] [ ] [ ] [ ]  YEAR  [ ] [ ]  MONTH  [ ] [ ]  DAY |
| Version number of the Informed Consent                                             | _____                                               |
| The version number of the protocol shall apply when the Informed Consent is signed | __ _ . _                                            |

|                                                                                    |                                                     |
|------------------------------------------------------------------------------------|-----------------------------------------------------|
| Signment of the Informed Consent Form (ICF)                                        |                                                     |
| Date of signing the Informed Consent                                               | [ ] [ ] [ ] [ ]  YEAR  [ ] [ ]  MONTH  [ ] [ ]  DAY |
| Version number of the Informed Consent                                             | _____                                               |
| The version number of the protocol shall apply when the Informed Consent is signed | __ _ . _                                            |

|                                                                                    |                                                     |
|------------------------------------------------------------------------------------|-----------------------------------------------------|
| Signment of the Informed Consent Form (ICF)                                        |                                                     |
| Date of signing the Informed Consent                                               | [ ] [ ] [ ] [ ]  YEAR  [ ] [ ]  MONTH  [ ] [ ]  DAY |
| Version number of the Informed Consent                                             | _____                                               |
| The version number of the protocol shall apply when the Informed Consent is signed | __ _ . _                                            |

# **Hydroxychloroquine sulfate in Adult Patients With 2019-nCoV Respiratory Infection: A Multicenter, Randomized, Open-Label, Controlled Study Case Report Form**

Center Number : ||

Subject Number : |||||

Abbreviation of Subject's Name: ||||

Name of Center (regular script): \_\_\_\_\_

Name of Doctor (regular script): \_\_\_\_\_

The Version and Date : Version 3.0 /February 25,2020

Applicable Clinical Type : Severe type

**CONFIDENTIAL**

---

The information contained here relates to trade secrets and business information. These business information terms confidential content or proprietary information, except as required by regulations, shall not be disclosed by any person. Any individual who has access to the document shall be aware of its proprietary or confidential nature and shall not disclose the document without authorization. The restrictions on the confidentiality of the above documents will apply to any information provided to you in the future that is marked as proprietary or confidential.



|                            |                              |                            |
|----------------------------|------------------------------|----------------------------|
| Protocol Number: KY2020-29 |                              | <b>Screening/Treatment</b> |
| Center Number  __          | Subject Screening Number  __ | Visit 1 (D-3~1)            |

## Guide to Fill out the Form

1. The case report form shall be recorded by an authorized person, and each page in the CRF shall be carefully checked and signed.
2. The trial physicians should be familiar with the trial protocol and master the GCP principles.
3. Please write clearly and legibly with a sign pen in blue or black ink, preferably in capital letters for English, for example: CASE REPORT FORM
4. When filling in Numbers in open squares, fill in one number in each box; If the number of digits is less than the corresponding number of squares, please fill with zero. Spaces are not allowed. For example: 56Kg, fill in the blanks as follows: |0|5|6|. |0|0|Kg.
5. The date is in the international ISO8601 date format: yyyyymmdd. For example, December 21, 2007 was written as |2|0|0|7|YEAR|1|2|Month|2|1|DAY.
6. For the items with "□" in the form, please type "x" in the corresponding box, , or fill in the relevant Numbers. If not done or the data is not available, please fill in ND(Not Done) or NK(not known) in the corresponding space; NA is not applicable.
7. Each item must be filled in accurately, do not arbitrarily alter, do not use correction fluid or other ways to cover the original data. If you find any errors, please cross out the wrong record with a single line so that the original record is still legible, then fill in the correct record at the top right, indicating the name, abbreviation and date of modification. For example: 58.6 <sup>56.8 ZH 2007-12-21</sup>.
- ~~8.~~ The four of the Chinese phoneticize abbreviation of the patient's name should be filled in. Fill in the first two letters of each word for the two-character name; fill in the first letter of three words and the second letter of the third word or the three-character name; and fill in the first letter of each word for the four-character name. The chinese phoneticize abbreviation of each patient's name should be unified in their CRF. For example: Zhang Hong| Z | H | H | 0 |, Li Shuming| L | S | M | I |, Ou Yang Xiaohui| O | Y | X | H |.
9. Do not change the format of the case report form. If you find that there is no place in the form to fill in the information the recorder wishes to record, please contact the responsible CRA.
10. Upon completion of the case report form, the principal investigator shall examine each page of the case report form and sign at the investigator's statement.

|                            |                                                                  |
|----------------------------|------------------------------------------------------------------|
| Protocol Number: KY2020-29 | <b>Screening/Treatment</b>                                       |
| Center Number [ ] [ ]      | Subject Screening Number [ ] [ ] [ ] [ ] [ ] [ ] [ ] [ ] [ ] [ ] |
| Visit 1 (D-3~1)            |                                                                  |

**Date of Current Visit:** [ ] [ ] [ ] [ ] [ ] [ ] Year [ ] [ ] MONTH [ ] [ ] DAY

**Sign the Informed Consent**

|                                                                                    |                                                          |
|------------------------------------------------------------------------------------|----------------------------------------------------------|
| Whether to sign informed consent                                                   | <input type="checkbox"/> NO <input type="checkbox"/> YES |
| Date of signing the Informed Consent                                               | [ ] [ ] [ ] [ ] YEAR [ ] [ ] MONTH [ ] [ ] DAY           |
| Version number of Informed Consent                                                 | _____                                                    |
| The version number of the protocol shall apply when the informed consent is signed | [ ] [ ] [ ] [ ]                                          |

**Confirm Inclusion/Exclusion Criteria**

|                                                                                                                 |                                                                                                                                                                                                                                                                                                              |
|-----------------------------------------------------------------------------------------------------------------|--------------------------------------------------------------------------------------------------------------------------------------------------------------------------------------------------------------------------------------------------------------------------------------------------------------|
| Do subjects meet all inclusion criteria and not all exclusion criteria?                                         | <input type="checkbox"/> YES <input type="checkbox"/> NO                                                                                                                                                                                                                                                     |
| <input type="checkbox"/> Does not meet the selection criteria, the selection criteria number (multiple choices) | <input type="checkbox"/> 1 <input type="checkbox"/> 2 <input type="checkbox"/> 3 <input type="checkbox"/> 4 <input type="checkbox"/> 5 <input type="checkbox"/> 6 <input type="checkbox"/> 7<br><input type="checkbox"/> Other, Please describe: _____                                                       |
| <input type="checkbox"/> Meet the exclusion criteria, the exclusion criteria number (multiple choices)          | <input type="checkbox"/> 1 <input type="checkbox"/> 2 <input type="checkbox"/> 3 <input type="checkbox"/> 4 <input type="checkbox"/> 5 <input type="checkbox"/> 6 <input type="checkbox"/> 7 <input type="checkbox"/> 8 <input type="checkbox"/> 9<br><input type="checkbox"/> Other, Please describe: _____ |

**Demographic Data**

|               |                                                                                                      |
|---------------|------------------------------------------------------------------------------------------------------|
| Gender        | <input type="checkbox"/> male <input type="checkbox"/> female                                        |
| Date of Birth | [ ] [ ] [ ] [ ] YEAR [ ] [ ] MONTH [ ] [ ] DAY If not available, please state age: [ ] [ ] years old |
| Nationality   | <input type="checkbox"/> Han <input type="checkbox"/> Other, Please describe: _____                  |

**History of 2019-nCoV Respiratory Infection**

|                                                                     |                                                                                           |
|---------------------------------------------------------------------|-------------------------------------------------------------------------------------------|
| Date of first onset                                                 | [ ] [ ] [ ] [ ] YEAR [ ] [ ] MONTH [ ] [ ] DAY                                            |
| History of exposure to related causes within 14 days prior to onset | <input type="checkbox"/> NO <input type="checkbox"/> YES <input type="checkbox"/> Unknown |

|                                                                                                                                                               |                                                                                                                                                                                                                                   |                            |
|---------------------------------------------------------------------------------------------------------------------------------------------------------------|-----------------------------------------------------------------------------------------------------------------------------------------------------------------------------------------------------------------------------------|----------------------------|
| Protocol Number: KY2020-29                                                                                                                                    |                                                                                                                                                                                                                                   | <b>Screening/Treatment</b> |
| Center Number  __                                                                                                                                             | Subject Screening Number  ____                                                                                                                                                                                                    | Visit 1 (D-3~1)            |
| Contact type (multiple choice)                                                                                                                                | <input type="checkbox"/> 1 Contact with Hubei region<br><input type="checkbox"/> 2 Contact with person infected with 2019-nCoV<br><input type="checkbox"/> 3 Unknown<br><input type="checkbox"/> 4 Other, please describe : _____ |                            |
| Previous anti-2019-nCoV treatment or not                                                                                                                      | <input type="checkbox"/> 0 NO <input type="checkbox"/> 1 YES                                                                                                                                                                      |                            |
| Date of first positive nucleic acid test                                                                                                                      | __ _ _ _ _ YEAR _ _ MONTH _ _ DAY                                                                                                                                                                                                 |                            |
| Clinical type at enrollment                                                                                                                                   | <input type="checkbox"/> 1 Mild <input type="checkbox"/> 2 Common <input type="checkbox"/> 3 severe <input type="checkbox"/> 4 critical                                                                                           |                            |
| Note: If the subject ever had a treatment for 2019-nCoV pneumonia, please fill in the form "past/combined drug therapy" and "past/combined non-drug therapy". |                                                                                                                                                                                                                                   |                            |

|                                                                                                                                           |
|-------------------------------------------------------------------------------------------------------------------------------------------|
| <b>History of Drug Allergy</b>                                                                                                            |
| Does the subject have a history of drug allergy?<br><input type="checkbox"/> 0 NO <input type="checkbox"/> 1 YES, Please describe : _____ |

| <b>Past/Concomitant Disease History</b>                                                                                                                                            |         |                                         |                                                                 |                                         |                                                                 |
|------------------------------------------------------------------------------------------------------------------------------------------------------------------------------------|---------|-----------------------------------------|-----------------------------------------------------------------|-----------------------------------------|-----------------------------------------------------------------|
| Does the subject have any past/concomitant disease other than 2019-nCoV pneumonia?<br><input type="checkbox"/> 0 NO <input type="checkbox"/> 1 YES, Please fill in the form below. |         |                                         |                                                                 |                                         |                                                                 |
| Number                                                                                                                                                                             | Disease | Confirmed Date                          | Disease persists or not?                                        | End Date                                | Receive treatment or not?                                       |
| 1                                                                                                                                                                                  |         | __ _ _ _ YEAR<br> _ _ MONTH <br>_ _ DAY | <input type="checkbox"/> 0 NO<br><input type="checkbox"/> 1 YES | __ _ _ _ YEAR<br> _ _ MONTH <br>_ _ DAY | <input type="checkbox"/> 0 NO<br><input type="checkbox"/> 1 YES |
| 2                                                                                                                                                                                  |         | __ _ _ _ YEAR<br> _ _ MONTH <br>_ _ DAY | <input type="checkbox"/> 0 NO<br><input type="checkbox"/> 1 YES | __ _ _ _ YEAR<br> _ _ MONTH <br>_ _ DAY | <input type="checkbox"/> 0 NO<br><input type="checkbox"/> 1 YES |
| 3                                                                                                                                                                                  |         | __ _ _ _ YEAR<br> _ _ MONTH <br>_ _ DAY | <input type="checkbox"/> 0 NO<br><input type="checkbox"/> 1 YES | __ _ _ _ YEAR<br> _ _ MONTH <br>_ _ DAY | <input type="checkbox"/> 0 NO<br><input type="checkbox"/> 1 YES |
| 4                                                                                                                                                                                  |         | __ _ _ _ YEAR<br> _ _ MONTH <br>_ _ DAY | <input type="checkbox"/> 0 NO<br><input type="checkbox"/> 1 YES | __ _ _ _ YEAR<br> _ _ MONTH <br>_ _ DAY | <input type="checkbox"/> 0 NO<br><input type="checkbox"/> 1 YES |
| 5                                                                                                                                                                                  |         | __ _ _ _ YEAR<br> _ _ MONTH <br>_ _ DAY | <input type="checkbox"/> 0 NO<br><input type="checkbox"/> 1 YES | __ _ _ _ YEAR<br> _ _ MONTH <br>_ _ DAY | <input type="checkbox"/> 0 NO<br><input type="checkbox"/> 1 YES |
| 6                                                                                                                                                                                  |         | __ _ _ _ YEAR<br> _ _ MONTH <br>_ _ DAY | <input type="checkbox"/> 0 NO<br><input type="checkbox"/> 1 YES | __ _ _ _ YEAR<br> _ _ MONTH <br>_ _ DAY | <input type="checkbox"/> 0 NO<br><input type="checkbox"/> 1 YES |

|                            |                            |
|----------------------------|----------------------------|
| Protocol Number: KY2020-29 | <b>Screening/Treatment</b> |
| Center Number [ ] [ ] [ ]  | Visit 1 (D-3~1)            |

|    |  |                                                          |                                                                 |                                                          |                                                                 |
|----|--|----------------------------------------------------------|-----------------------------------------------------------------|----------------------------------------------------------|-----------------------------------------------------------------|
| 7  |  | [ ] [ ] [ ] [ ]  YEAR<br>[ ] [ ]  MONTH <br>[ ] [ ]  DAY | <input type="checkbox"/> 0 NO<br><input type="checkbox"/> 1 YES | [ ] [ ] [ ] [ ]  YEAR<br>[ ] [ ]  MONTH <br>[ ] [ ]  DAY | <input type="checkbox"/> 0 NO<br><input type="checkbox"/> 1 YES |
| 8  |  | [ ] [ ] [ ] [ ]  YEAR<br>[ ] [ ]  MONTH <br>[ ] [ ]  DAY | <input type="checkbox"/> 0 NO<br><input type="checkbox"/> 1 YES | [ ] [ ] [ ] [ ]  YEAR<br>[ ] [ ]  MONTH <br>[ ] [ ]  DAY | <input type="checkbox"/> 0 NO<br><input type="checkbox"/> 1 YES |
| 9  |  | [ ] [ ] [ ] [ ]  YEAR<br>[ ] [ ]  MONTH <br>[ ] [ ]  DAY | <input type="checkbox"/> 0 NO<br><input type="checkbox"/> 1 YES | [ ] [ ] [ ] [ ]  YEAR<br>[ ] [ ]  MONTH <br>[ ] [ ]  DAY | <input type="checkbox"/> 0 NO<br><input type="checkbox"/> 1 YES |
| 10 |  | [ ] [ ] [ ] [ ]  YEAR<br>[ ] [ ]  MONTH <br>[ ] [ ]  DAY | <input type="checkbox"/> 0 NO<br><input type="checkbox"/> 1 YES | [ ] [ ] [ ] [ ]  YEAR<br>[ ] [ ]  MONTH <br>[ ] [ ]  DAY | <input type="checkbox"/> 0 NO<br><input type="checkbox"/> 1 YES |

|                                                                         |                                                                            |                    |                                                                                                                                                                                                                                |
|-------------------------------------------------------------------------|----------------------------------------------------------------------------|--------------------|--------------------------------------------------------------------------------------------------------------------------------------------------------------------------------------------------------------------------------|
| <b>Vital Signs</b> <input type="checkbox"/> 0 Unexamined, reason: _____ |                                                                            |                    |                                                                                                                                                                                                                                |
| Date                                                                    | [ ] [ ] [ ] [ ]  YEAR  [ ] [ ]  MONTH  [ ] [ ]  DAY                        |                    |                                                                                                                                                                                                                                |
| Daily maximum temperature                                               | [ ] [ ] [ ] . [ ] [ ] °C                                                   | Measurement method | <input type="checkbox"/> 1 Axilla <input type="checkbox"/> 2 Oral <input type="checkbox"/> 3 Anus<br><input type="checkbox"/> 4 Ear <input type="checkbox"/> 5 Unknown <input type="checkbox"/> 6 Other, please describe _____ |
| Respiratory                                                             | [ ] [ ] [ ]  times/min                                                     | Pulse              | [ ] [ ] [ ] [ ]  times/min                                                                                                                                                                                                     |
| Blood pressure                                                          | [ ] [ ] [ ] [ ] / [ ] [ ] [ ] [ ] mmHg (Systolic/diastolic blood pressure) |                    |                                                                                                                                                                                                                                |

|                                                                                  |                                                                                                                |                            |                            |                            |
|----------------------------------------------------------------------------------|----------------------------------------------------------------------------------------------------------------|----------------------------|----------------------------|----------------------------|
| <b>Physical Examination</b> <input type="checkbox"/> 0 Unexamined, reason: _____ |                                                                                                                |                            |                            |                            |
| Date                                                                             | [ ] [ ] [ ] [ ]  YEAR  [ ] [ ]  MONTH  [ ] [ ]  DAY                                                            |                            |                            |                            |
| Inspection Part                                                                  | Result                                                                                                         |                            |                            |                            |
|                                                                                  | 1= Normal<br>2= Abnormal, No Clinical significance<br>3= Abnormal, with Clinically significant<br>0=Unexamined |                            |                            |                            |
|                                                                                  | If abnormal, please describe                                                                                   |                            |                            |                            |
| General appearance                                                               | <input type="checkbox"/> 1                                                                                     | <input type="checkbox"/> 2 | <input type="checkbox"/> 3 | <input type="checkbox"/> 0 |
| Head                                                                             | <input type="checkbox"/> 1                                                                                     | <input type="checkbox"/> 2 | <input type="checkbox"/> 3 | <input type="checkbox"/> 0 |
| Eyes                                                                             | <input type="checkbox"/> 1                                                                                     | <input type="checkbox"/> 2 | <input type="checkbox"/> 3 | <input type="checkbox"/> 0 |

|                            |                                      |                            |
|----------------------------|--------------------------------------|----------------------------|
| Protocol Number: KY2020-29 |                                      | <b>Screening/Treatment</b> |
| Center Number  __ _        | Subject Screening Number  __ _ _ _ _ | Visit 1 (D-3~1)            |

|                        |                            |                            |                            |                            |  |
|------------------------|----------------------------|----------------------------|----------------------------|----------------------------|--|
| Nose                   | <input type="checkbox"/> 1 | <input type="checkbox"/> 2 | <input type="checkbox"/> 3 | <input type="checkbox"/> 0 |  |
| Larynx                 | <input type="checkbox"/> 1 | <input type="checkbox"/> 2 | <input type="checkbox"/> 3 | <input type="checkbox"/> 0 |  |
| Neck and thyroid       | <input type="checkbox"/> 1 | <input type="checkbox"/> 2 | <input type="checkbox"/> 3 | <input type="checkbox"/> 0 |  |
| Skin                   | <input type="checkbox"/> 1 | <input type="checkbox"/> 2 | <input type="checkbox"/> 3 | <input type="checkbox"/> 0 |  |
| Cardiovascular system  | <input type="checkbox"/> 1 | <input type="checkbox"/> 2 | <input type="checkbox"/> 3 | <input type="checkbox"/> 0 |  |
| Chest and lungs        | <input type="checkbox"/> 1 | <input type="checkbox"/> 2 | <input type="checkbox"/> 3 | <input type="checkbox"/> 0 |  |
| Abdomen                | <input type="checkbox"/> 1 | <input type="checkbox"/> 2 | <input type="checkbox"/> 3 | <input type="checkbox"/> 0 |  |
| Nervous system         | <input type="checkbox"/> 1 | <input type="checkbox"/> 2 | <input type="checkbox"/> 3 | <input type="checkbox"/> 0 |  |
| Musculoskeletal system | <input type="checkbox"/> 1 | <input type="checkbox"/> 2 | <input type="checkbox"/> 3 | <input type="checkbox"/> 0 |  |
| Lymphatic system       | <input type="checkbox"/> 1 | <input type="checkbox"/> 2 | <input type="checkbox"/> 3 | <input type="checkbox"/> 0 |  |

|                                                                                                                                           |
|-------------------------------------------------------------------------------------------------------------------------------------------|
| <b>Respiratory symptoms</b> <input type="checkbox"/> 0 Unexamined, reason: _____                                                          |
| Date:  __ _ _ _ _ YEAR __ _ MONTH __ _ DAY                                                                                                |
| Whether the subject has respiratory symptoms or not: <input type="checkbox"/> 0 NO <input type="checkbox"/> 1 YES, Please describe: _____ |

| <b>Blood Count</b> <input type="checkbox"/> 0 Unexamined, reason _____ |                                                |                                        |                                  |                            |                            |                            |
|------------------------------------------------------------------------|------------------------------------------------|----------------------------------------|----------------------------------|----------------------------|----------------------------|----------------------------|
| Date:  __ _ _ _ _ YEAR __ _ MONTH __ _ DAY                             |                                                |                                        | Normal range Number.  __ _ _ _ _ |                            |                            |                            |
| Item                                                                   | Result                                         |                                        | Result Interpretation            |                            |                            | Unexamined                 |
|                                                                        | measured values                                | Unit                                   | Normal                           | Abnormal                   |                            |                            |
|                                                                        |                                                |                                        |                                  | No Clinical significance   | Clinically significant     |                            |
| Red Blood Cell (RBC)                                                   | <input type="checkbox"/> 1 10 <sup>12</sup> /L | <input type="checkbox"/> 2 Other: ____ | <input type="checkbox"/> 1       | <input type="checkbox"/> 2 | <input type="checkbox"/> 3 | <input type="checkbox"/> 0 |
| White blood cell                                                       | <input type="checkbox"/> 1 10 <sup>9</sup> /L  | <input type="checkbox"/> 2 Other: ____ | <input type="checkbox"/> 1       | <input type="checkbox"/> 2 | <input type="checkbox"/> 3 | <input type="checkbox"/> 0 |
| Hemoglobin (Hb)                                                        | <input type="checkbox"/> 1 g/L                 | <input type="checkbox"/> 2 Other: ____ | <input type="checkbox"/> 1       | <input type="checkbox"/> 2 | <input type="checkbox"/> 3 | <input type="checkbox"/> 0 |
| Platelet (PLT)                                                         | <input type="checkbox"/> 1 10 <sup>9</sup> /L  | <input type="checkbox"/> 2 Other: ____ | <input type="checkbox"/> 1       | <input type="checkbox"/> 2 | <input type="checkbox"/> 3 | <input type="checkbox"/> 0 |
| Neutrophil (ANC)                                                       | <input type="checkbox"/> 1 10 <sup>9</sup> /L  | <input type="checkbox"/> 2 Other: ____ | <input type="checkbox"/> 1       | <input type="checkbox"/> 2 | <input type="checkbox"/> 3 | <input type="checkbox"/> 0 |
| Lymphocyte (LY)                                                        | <input type="checkbox"/> 1 10 <sup>9</sup> /L  | <input type="checkbox"/> 2 Other: ____ | <input type="checkbox"/> 1       | <input type="checkbox"/> 2 | <input type="checkbox"/> 3 | <input type="checkbox"/> 0 |
| Monocyte (MO)                                                          | <input type="checkbox"/> 1 10 <sup>9</sup> /L  | <input type="checkbox"/> 2 Other: ____ | <input type="checkbox"/> 1       | <input type="checkbox"/> 2 | <input type="checkbox"/> 3 | <input type="checkbox"/> 0 |



|                            |                                                                  |
|----------------------------|------------------------------------------------------------------|
| Protocol Number: KY2020-29 | <b>Screening/Treatment</b>                                       |
| Center Number [ ] [ ]      | Subject Screening Number [ ] [ ] [ ] [ ] [ ] [ ] [ ] [ ] [ ] [ ] |
| Visit 1 (D-3~1)            |                                                                  |

|                   |                                                                              |                            |                            |                            |                            |
|-------------------|------------------------------------------------------------------------------|----------------------------|----------------------------|----------------------------|----------------------------|
| Urine Erythrocyte | <input type="checkbox"/> 1 Not Applicable <input type="checkbox"/> 2 Other : | <input type="checkbox"/> 1 | <input type="checkbox"/> 2 | <input type="checkbox"/> 3 | <input type="checkbox"/> 0 |
| Urine Leukocyte   | <input type="checkbox"/> 1 Not Applicable <input type="checkbox"/> 2 Other : | <input type="checkbox"/> 1 | <input type="checkbox"/> 2 | <input type="checkbox"/> 3 | <input type="checkbox"/> 0 |
| Urine Ketone      | <input type="checkbox"/> 1 Not Applicable <input type="checkbox"/> 2 Other : | <input type="checkbox"/> 1 | <input type="checkbox"/> 2 | <input type="checkbox"/> 3 | <input type="checkbox"/> 0 |

|                                                                                 |
|---------------------------------------------------------------------------------|
| <b>Coagulation Function</b> <input type="checkbox"/> 0 Unexamined, reason _____ |
|---------------------------------------------------------------------------------|

Date: [ ] [ ] [ ] [ ] [ ] [ ] | YEAR | [ ] [ ] [ ] [ ] | MONTH | [ ] [ ] [ ] [ ] | DAY      Normal range Number: [ ] [ ] [ ] [ ] [ ] [ ]

| Item                                         | Result                                                                             |                            | Result Interpretation      |                            |                            | Unexamined Unit |
|----------------------------------------------|------------------------------------------------------------------------------------|----------------------------|----------------------------|----------------------------|----------------------------|-----------------|
|                                              | measured value                                                                     | Unit                       | Normal                     | Abnormal                   |                            |                 |
|                                              |                                                                                    |                            |                            | No Clinical significance   | Clinical significance      |                 |
| ProthrombinTime (PT)                         | <input type="checkbox"/> 1 S <input type="checkbox"/> 2 Other :                    | <input type="checkbox"/> 1 | <input type="checkbox"/> 2 | <input type="checkbox"/> 3 | <input type="checkbox"/> 0 |                 |
| Activated Partial Thromboplastin Time (APTT) | <input type="checkbox"/> 1 S <input type="checkbox"/> 2 Other : _____              | <input type="checkbox"/> 1 | <input type="checkbox"/> 2 | <input type="checkbox"/> 3 | <input type="checkbox"/> 0 |                 |
| Thrombin Time (TT)                           | <input type="checkbox"/> 1 S <input type="checkbox"/> 2 Other :                    | <input type="checkbox"/> 1 | <input type="checkbox"/> 2 | <input type="checkbox"/> 3 | <input type="checkbox"/> 0 |                 |
| Fibrinogen (Fbg)                             | <input type="checkbox"/> 1 g/L <input type="checkbox"/> 2 Other :                  | <input type="checkbox"/> 1 | <input type="checkbox"/> 2 | <input type="checkbox"/> 3 | <input type="checkbox"/> 0 |                 |
| International Normalized Ratio (INR)         | <input type="checkbox"/> 1 Not Applicable <input type="checkbox"/> 2 Other : _____ | <input type="checkbox"/> 1 | <input type="checkbox"/> 2 | <input type="checkbox"/> 3 | <input type="checkbox"/> 0 |                 |

|                                                                                     |
|-------------------------------------------------------------------------------------|
| <b>C-Reactive Protein (CRP)</b> <input type="checkbox"/> 0 Unexamined, reason _____ |
|-------------------------------------------------------------------------------------|

Date: [ ] [ ] [ ] [ ] [ ] [ ] | YEAR | [ ] [ ] [ ] [ ] | MONTH | [ ] [ ] [ ] [ ] | DAY      Normal range Number: [ ] [ ] [ ] [ ] [ ] [ ]

| Item                     | Result                                                                  |                            | Result Interpretation      |                            |                       |
|--------------------------|-------------------------------------------------------------------------|----------------------------|----------------------------|----------------------------|-----------------------|
|                          | Measured Value                                                          | Unit                       | Normal                     | Abnormal                   |                       |
|                          |                                                                         |                            |                            | No Clinical significance   | Clinical significance |
| C-Reactive Protine (CRP) | <input type="checkbox"/> 1 mg/L <input type="checkbox"/> 2 Other: _____ | <input type="checkbox"/> 1 | <input type="checkbox"/> 2 | <input type="checkbox"/> 3 |                       |

|                                                                                                 |
|-------------------------------------------------------------------------------------------------|
| <b>Erythrocyte Sedimentation Rate (ESR)</b> <input type="checkbox"/> 0 Unexamined, reason _____ |
|-------------------------------------------------------------------------------------------------|

Date: [ ] [ ] [ ] [ ] [ ] [ ] | YEAR | [ ] [ ] [ ] [ ] | MONTH | [ ] [ ] [ ] [ ] | DAY      Normal range Number: [ ] [ ] [ ] [ ] [ ] [ ]

| Item                                 | Result                                                                  |                            | Result Interpretation      |                            |                       |
|--------------------------------------|-------------------------------------------------------------------------|----------------------------|----------------------------|----------------------------|-----------------------|
|                                      | Measured Value                                                          | Unit                       | Normal                     | Abnormal                   |                       |
|                                      |                                                                         |                            |                            | No Clinical significance   | Clinical significance |
| Erythrocyte Sedimentation Rate (ESR) | <input type="checkbox"/> 1 mm/h <input type="checkbox"/> 2 Other: _____ | <input type="checkbox"/> 1 | <input type="checkbox"/> 2 | <input type="checkbox"/> 3 |                       |

|                                                                  |
|------------------------------------------------------------------|
| <b>TNF-α</b> <input type="checkbox"/> 0 Unexamined, reason _____ |
|------------------------------------------------------------------|

Date: [ ] [ ] [ ] [ ] [ ] [ ] | YEAR | [ ] [ ] [ ] [ ] | MONTH | [ ] [ ] [ ] [ ] | DAY      Normal range Number: [ ] [ ] [ ] [ ] [ ] [ ]

|                            |                              |
|----------------------------|------------------------------|
| Protocol Number: KY2020-29 | <b>Screening/Treatment</b>   |
| Center Number  __          | Subject Screening Number  __ |
| Visit 1 (D-3~1)            |                              |

| Item          | Result         |                                         | Normal                     | Result Interpretation      |                            |
|---------------|----------------|-----------------------------------------|----------------------------|----------------------------|----------------------------|
|               | Measured Value | Unit                                    |                            | U                          |                            |
| TNF- $\alpha$ |                | <input type="checkbox"/> 1 pg/mL        | <input type="checkbox"/> 1 | <input type="checkbox"/> 2 | <input type="checkbox"/> 3 |
|               |                | <input type="checkbox"/> 2 Other: _____ |                            | <input type="checkbox"/> 2 | <input type="checkbox"/> 3 |

|                                         |                                                     |
|-----------------------------------------|-----------------------------------------------------|
| <b>IL-6</b>                             | <input type="checkbox"/> 0 Unexamined, reason _____ |
| Date:  __   __   __   __   __   __      | YEAR  __   __   __   __   __   __                   |
| Normal range Number:  __   __   __   __ |                                                     |

| Item | Result         |                                         | Normal                     | Result Interpretation      |                            |
|------|----------------|-----------------------------------------|----------------------------|----------------------------|----------------------------|
|      | Measured Value | Unit                                    |                            | Abnormal                   |                            |
| IL-6 |                | <input type="checkbox"/> 1 pg/mL        | <input type="checkbox"/> 1 | <input type="checkbox"/> 2 | <input type="checkbox"/> 3 |
|      |                | <input type="checkbox"/> 2 Other: _____ |                            | <input type="checkbox"/> 2 | <input type="checkbox"/> 3 |

|                                                                                 |
|---------------------------------------------------------------------------------|
| <b>Urine or serum HCG (Only applicable to women of childbearing age)</b>        |
| <input type="checkbox"/> 0 Unexamined, reason _____                             |
| <input type="checkbox"/> 1 Not Applicable (Man or woman without fertility)      |
| Date:  __   __   __   __   __   __                                              |
| Sample: <input type="checkbox"/> 1 Blood <input type="checkbox"/> 2 Urine       |
| Result: <input type="checkbox"/> 1 Negative <input type="checkbox"/> 2 Positive |

|                                                                                                                                                                     |                                                     |
|---------------------------------------------------------------------------------------------------------------------------------------------------------------------|-----------------------------------------------------|
| <b>Routine 12 Leads Electrocardiogram</b>                                                                                                                           | <input type="checkbox"/> 0 Unexamined, reason _____ |
| Date:  __   __   __   __   __   __                                                                                                                                  | YEAR  __   __   __   __   __   __                   |
| Result: <input type="checkbox"/> 1 Normal <input type="checkbox"/> 2 Abnormal, No Clinical significance <input type="checkbox"/> 3 Abnormal, Clinically significant |                                                     |
| If "Abnormal", please describe: _____                                                                                                                               |                                                     |

|                                                                                                                                                                   |                                                     |
|-------------------------------------------------------------------------------------------------------------------------------------------------------------------|-----------------------------------------------------|
| <b>Chest CT</b>                                                                                                                                                   | <input type="checkbox"/> 0 Unexamined, reason _____ |
| Date:  __   __   __   __   __   __                                                                                                                                | YEAR  __   __   __   __   __   __                   |
| Result: <input type="checkbox"/> 1 Normal <input type="checkbox"/> 2 Abnormal, No Clinical significance <input type="checkbox"/> 3 Abnormal, Clinical significant |                                                     |
| If abnormal, please describe _____                                                                                                                                |                                                     |

|                                                                                                                                        |                                                     |
|----------------------------------------------------------------------------------------------------------------------------------------|-----------------------------------------------------|
| <b>Nucleic Acid Test of 2019-nCov</b>                                                                                                  | <input type="checkbox"/> 0 Unexamined, reason _____ |
| Sampling Part (multiple choice): <input type="checkbox"/> 1 Upper respiratory tract <input type="checkbox"/> 2 Lower respiratory tract |                                                     |



|                            |                            |
|----------------------------|----------------------------|
| Protocol Number: KY2020-29 | <b>Screening/Treatment</b> |
| Center Number  __          | Visit 1 (D-3~1)            |

|                         |                                                                                                                                                                                                                               |
|-------------------------|-------------------------------------------------------------------------------------------------------------------------------------------------------------------------------------------------------------------------------|
| Upper respiratory tract | Date:  __ _ _ _ _ YEAR __ _ MONTH __ _ DAY<br>Result: <input type="checkbox"/> 1 Negative <input type="checkbox"/> 2 Positive <input type="checkbox"/> 3 Unidentified <input type="checkbox"/> 4 Other, please describe _____ |
| Lower respiratory tract | Date:  __ _ _ _ _ YEAR __ _ MONTH __ _ DAY<br>Result: <input type="checkbox"/> 1 Negative <input type="checkbox"/> 2 Positive <input type="checkbox"/> 3 Unidentified <input type="checkbox"/> 4 Other, please describe _____ |
| Result                  | <input type="checkbox"/> 1 Negative <input type="checkbox"/> 2 Positive <input type="checkbox"/> 3 Unidentified <input type="checkbox"/> 4 Other, please describe _____                                                       |

|                                                                                                                |
|----------------------------------------------------------------------------------------------------------------|
| <b>Pulse oxygen saturation (without oxygen inhalation )</b> <input type="checkbox"/> 0 Unexamined, reason_____ |
| Date:  __ _ _ _ _ YEAR __ _ MONTH __ _ DAY                                                                     |
| Measured Value: _____% (Rest state)                                                                            |

| <b>Arterial Blood Gas Analysis</b> <input type="checkbox"/> 0 Unexamined, reason_____                 |                |                                                                           |                            |                            |                            |                            |
|-------------------------------------------------------------------------------------------------------|----------------|---------------------------------------------------------------------------|----------------------------|----------------------------|----------------------------|----------------------------|
| Inhalate oxygen or not? <input type="checkbox"/> 0 No <input type="checkbox"/> 1 Yes, (FiO2) : _____% |                |                                                                           |                            |                            |                            |                            |
| Date:  __ _ _ _ _ YEAR __ _ MONTH __ _ DAY                                                            |                |                                                                           |                            |                            |                            |                            |
| Item                                                                                                  | Result         |                                                                           | Result Interpretation      |                            |                            | Unexamined                 |
|                                                                                                       | Measured Value | Unit                                                                      | Normal                     | No Clinical significance   | Significant clinically     |                            |
| Arterial partial pressure of oxygen (PaO2)                                                            |                | <input type="checkbox"/> 1 mmHg <input type="checkbox"/> 2<br>Other:_____ | <input type="checkbox"/> 1 | <input type="checkbox"/> 2 | <input type="checkbox"/> 3 | <input type="checkbox"/> 0 |
| Oxygen saturation (SaO2)                                                                              |                | <input type="checkbox"/> 1 % <input type="checkbox"/> 2 Other:_____       | <input type="checkbox"/> 1 | <input type="checkbox"/> 2 | <input type="checkbox"/> 3 | <input type="checkbox"/> 0 |

|                                                                              |                                                                                                                                                                                                                                                                                                                                                                                                                                                              |
|------------------------------------------------------------------------------|--------------------------------------------------------------------------------------------------------------------------------------------------------------------------------------------------------------------------------------------------------------------------------------------------------------------------------------------------------------------------------------------------------------------------------------------------------------|
| <b>Clinical status</b> <input type="checkbox"/> 0 No evaluation, reason_____ |                                                                                                                                                                                                                                                                                                                                                                                                                                                              |
| Date:                                                                        | __ _ _ _ _ YEAR __ _ MONTH __ _ DAY                                                                                                                                                                                                                                                                                                                                                                                                                          |
| Result                                                                       | <input type="checkbox"/> 1 Level 1: discharge<br><input type="checkbox"/> 2 Level 2: hospitalization, oxygen therapy is not required<br><input type="checkbox"/> 3 Level 3: hospitalization, require oxygen therapy<br><input type="checkbox"/> 4 Level 4:ICU/ hospitalization, require noninvasive ventilation (NIV)/ High flow nasal catheter oxygen therapy (HFNC)<br><input type="checkbox"/> 5 Level 5:ICU, require extracorporeal membrane oxygenation |

|                            |                                                                                                          |                            |
|----------------------------|----------------------------------------------------------------------------------------------------------|----------------------------|
| Protocol Number: KY2020-29 |                                                                                                          | <b>Screening/Treatment</b> |
| Center Number  _ _         | Subject Screening Number  _ _ _ _ _                                                                      | Visit 1 (D-3~1)            |
|                            | (ECMO)and/or invasive mechanical ventilation(IMV)<br><input type="checkbox"/> <sub>6</sub> Level 6:Death |                            |

|                                                                                      |                                                                                                              |
|--------------------------------------------------------------------------------------|--------------------------------------------------------------------------------------------------------------|
| <b>Screening Result</b>                                                              | <input type="checkbox"/> <sub>0</sub> Not Evaluated, reason _____                                            |
| Is the subject screened successfully?                                                |                                                                                                              |
| <input type="checkbox"/> <sub>0</sub> NO, the main cause of failure screening: _____ |                                                                                                              |
| <input type="checkbox"/> <sub>1</sub> YES, please randomize                          |                                                                                                              |
| Randomize Date:  _ _ _ _ YEAR _ _ MONTH _ _ DAY                                      |                                                                                                              |
| Randomize Number:                                                                    |                                                                                                              |
| Randomized Group                                                                     | <input type="checkbox"/> <sub>1</sub> Experimental group <input type="checkbox"/> <sub>2</sub> Control group |

If any adverse events have occurred since the signing of the informed consent, please fill in the form of "adverse events"; If there is medication combination, please fill in the form "previous/combined medication"; If there is combined non-drug therapy, please fill in the "previous/combined non-drug therapy" form; If there is an out-of-plan inspection, please fill in the "out-of-plan inspection" form; If there is IMV/NIV, ECMO, HFNC, oxygen therapy, please fill in the "IMV/NIV, ECMO, HFNC, oxygen therapy" form.

|                            |                                             |
|----------------------------|---------------------------------------------|
| Protocol Number: KY2020-29 | <b>Treatment</b>                            |
| Center Number  __ <br> __  | Subject Screening Number<br>Visit 2 (D4±1d) |

**Date of Current Visit:** |\_\_| |\_\_| |\_\_| |\_\_| YEAR |\_\_| |\_\_| MONTH |\_\_| |\_\_| DAY

|                                                                      |                                                                         |                    |                                                                                                                                                                                                                                |
|----------------------------------------------------------------------|-------------------------------------------------------------------------|--------------------|--------------------------------------------------------------------------------------------------------------------------------------------------------------------------------------------------------------------------------|
| <b>Vital Signs</b> <input type="checkbox"/> Unexamined, reason _____ |                                                                         |                    |                                                                                                                                                                                                                                |
| Date                                                                 | __   __   __   __  YEAR  __   __  MONTH  __   __  DAY                   |                    |                                                                                                                                                                                                                                |
| Daily maximum temperature                                            | __   __   __  °C                                                        | Measurement method | <input type="checkbox"/> 1 Axilla <input type="checkbox"/> 2 Oral <input type="checkbox"/> 3 Anus<br><input type="checkbox"/> 4 Ear <input type="checkbox"/> 5 Unknown <input type="checkbox"/> 6 Other, please describe _____ |
| Respiratory                                                          | __   __  times/min                                                      | Pulse              | __   __   __  times/min                                                                                                                                                                                                        |
| Blood pressure                                                       | __   __   __  /  __   __   __  mmHg (Systolic/diastolic blood pressure) |                    |                                                                                                                                                                                                                                |

|                                                                                                                                                                     |
|---------------------------------------------------------------------------------------------------------------------------------------------------------------------|
| <b>Respiratory symptoms</b> <input type="checkbox"/> Unexamined, reason _____                                                                                       |
| Date:  __   __   __   __  YEAR  __   __  MONTH  __   __  DAY                                                                                                        |
| Whether the subject has respiratory symptoms or not: <input type="checkbox"/> 0 NO <input type="checkbox"/> 1 YES, please describe: _____                           |
| Result: <input type="checkbox"/> 1 Normal <input type="checkbox"/> 2 Abnormal, No Clinical significance <input type="checkbox"/> 3 Abnormal, Clinically significant |

| <b>Blood Count</b> <input type="checkbox"/> Unexamined, reason _____ |                                                                                        |                                         |                            |                            |                            |                            |
|----------------------------------------------------------------------|----------------------------------------------------------------------------------------|-----------------------------------------|----------------------------|----------------------------|----------------------------|----------------------------|
| Date:  __   __   __   __  YEAR  __   __  MONTH  __   __  DAY         |                                                                                        | Normal range Number:  __   __   __   __ |                            |                            |                            |                            |
| Item                                                                 | Result                                                                                 |                                         | Result Interpretation      |                            |                            | Unexamined                 |
|                                                                      | Measured Value                                                                         | Unit                                    | Normal                     | Abnormal                   |                            |                            |
|                                                                      |                                                                                        |                                         |                            | No Clinical significance   | Clinical significance      |                            |
| Red Blood Cell (RBC)                                                 | <input type="checkbox"/> 1 10 <sup>12</sup> /L <input type="checkbox"/> 2 Other: _____ |                                         | <input type="checkbox"/> 1 | <input type="checkbox"/> 2 | <input type="checkbox"/> 3 | <input type="checkbox"/> 0 |
| White Blood Cell                                                     | <input type="checkbox"/> 1 10 <sup>9</sup> /L <input type="checkbox"/> 2 Other: _____  |                                         | <input type="checkbox"/> 1 | <input type="checkbox"/> 2 | <input type="checkbox"/> 3 | <input type="checkbox"/> 0 |
| Hemoglobin (Hb)                                                      | <input type="checkbox"/> 1 g/L <input type="checkbox"/> 2 Other: _____                 |                                         | <input type="checkbox"/> 1 | <input type="checkbox"/> 2 | <input type="checkbox"/> 3 | <input type="checkbox"/> 0 |
| Platelet (PLT)                                                       | <input type="checkbox"/> 1 10 <sup>9</sup> /L <input type="checkbox"/> 2 Other: _____  |                                         | <input type="checkbox"/> 1 | <input type="checkbox"/> 2 | <input type="checkbox"/> 3 | <input type="checkbox"/> 0 |
| Neutrophil (ANC)                                                     | <input type="checkbox"/> 1 10 <sup>9</sup> /L <input type="checkbox"/> 2 Other: _____  |                                         | <input type="checkbox"/> 1 | <input type="checkbox"/> 2 | <input type="checkbox"/> 3 | <input type="checkbox"/> 0 |
| Lymphocyte (LY)                                                      | <input type="checkbox"/> 1 10 <sup>9</sup> /L <input type="checkbox"/> 2 Other: _____  |                                         | <input type="checkbox"/> 1 | <input type="checkbox"/> 2 | <input type="checkbox"/> 3 | <input type="checkbox"/> 0 |
| Monocyte (MO)                                                        | <input type="checkbox"/> 1 10 <sup>9</sup> /L <input type="checkbox"/> 2 Other: _____  |                                         | <input type="checkbox"/> 1 | <input type="checkbox"/> 2 | <input type="checkbox"/> 3 | <input type="checkbox"/> 0 |
| Eosinophil (EO)                                                      | <input type="checkbox"/> 1 10 <sup>9</sup> /L <input type="checkbox"/> 2 Other: _____  |                                         | <input type="checkbox"/> 1 | <input type="checkbox"/> 2 | <input type="checkbox"/> 3 | <input type="checkbox"/> 0 |
| Basophil (BA)                                                        | <input type="checkbox"/> 1 10 <sup>9</sup> /L <input type="checkbox"/> 2 Other: _____  |                                         | <input type="checkbox"/> 1 | <input type="checkbox"/> 2 | <input type="checkbox"/> 3 | <input type="checkbox"/> 0 |

|                                                                             |
|-----------------------------------------------------------------------------|
| <b>Blood Biochemistry</b> <input type="checkbox"/> Unexamined, reason _____ |
|-----------------------------------------------------------------------------|

|                                    |                                               |
|------------------------------------|-----------------------------------------------|
| Protocol Number: KY2020-29         | <b>Treatment</b>                              |
| Center Number <input type="text"/> | Subject Screening Number <input type="text"/> |
| <input type="text"/>               | Visit 2 (D4±1d)                               |

Date |||YEAR|||MONTH|||DAY      Normal range Number: |||

| Item                                   | Result                            |                                        | Result Interpretation      |                            |                            | Unexamined                 |
|----------------------------------------|-----------------------------------|----------------------------------------|----------------------------|----------------------------|----------------------------|----------------------------|
|                                        | Measured Value                    | Unit                                   | Normal                     | Abnormal                   |                            |                            |
|                                        |                                   |                                        |                            | No Clinical significance   | Clinical significance      |                            |
| Glutamic-pyruvic transaminase (ALT)    | <input type="checkbox"/> 1 U/L    | <input type="checkbox"/> 2Other: _____ | <input type="checkbox"/> 1 | <input type="checkbox"/> 2 | <input type="checkbox"/> 3 | <input type="checkbox"/> 0 |
| Glutamic-oxalacetic transaminase (AST) | <input type="checkbox"/> 1 U/L    | <input type="checkbox"/> 2Other: _____ | <input type="checkbox"/> 1 | <input type="checkbox"/> 2 | <input type="checkbox"/> 3 | <input type="checkbox"/> 0 |
| Total Bilirubin (TBIL)                 | <input type="checkbox"/> 1 µmol/L | <input type="checkbox"/> 2Other: _____ | <input type="checkbox"/> 1 | <input type="checkbox"/> 2 | <input type="checkbox"/> 3 | <input type="checkbox"/> 0 |
| Albumin (ALB)                          | <input type="checkbox"/> 1 g/L    | <input type="checkbox"/> 2Other: _____ | <input type="checkbox"/> 1 | <input type="checkbox"/> 2 | <input type="checkbox"/> 3 | <input type="checkbox"/> 0 |
| γ- glutamyl transpeptidase (GGT)       | <input type="checkbox"/> 1 U/L    | <input type="checkbox"/> 2Other: _____ | <input type="checkbox"/> 1 | <input type="checkbox"/> 2 | <input type="checkbox"/> 3 | <input type="checkbox"/> 0 |
| Lactic dehydrogenase (LDH)             | <input type="checkbox"/> 1 U/L    | <input type="checkbox"/> 2Other: _____ | <input type="checkbox"/> 1 | <input type="checkbox"/> 2 | <input type="checkbox"/> 3 | <input type="checkbox"/> 0 |
| Creatine kinase (CK)                   | <input type="checkbox"/> 1 U/L    | <input type="checkbox"/> 2Other: _____ | <input type="checkbox"/> 1 | <input type="checkbox"/> 2 | <input type="checkbox"/> 3 | <input type="checkbox"/> 0 |
| Creatine kinase isoenzyme (CK-MB)      | <input type="checkbox"/> 1 U/L    | <input type="checkbox"/> 2Other: _____ | <input type="checkbox"/> 1 | <input type="checkbox"/> 2 | <input type="checkbox"/> 3 | <input type="checkbox"/> 0 |
| Blood urea nitrogen (BUN)              | <input type="checkbox"/> 1 mmol/L | <input type="checkbox"/> 2Other: _____ | <input type="checkbox"/> 1 | <input type="checkbox"/> 2 | <input type="checkbox"/> 3 | <input type="checkbox"/> 0 |
| Urea (Urea)                            | <input type="checkbox"/> 1 mmol/L | <input type="checkbox"/> 2Other: _____ | <input type="checkbox"/> 1 | <input type="checkbox"/> 2 | <input type="checkbox"/> 3 | <input type="checkbox"/> 0 |
| Serum creatinine (CR)                  | <input type="checkbox"/> 1 µmol/L | <input type="checkbox"/> 2Other: _____ | <input type="checkbox"/> 1 | <input type="checkbox"/> 2 | <input type="checkbox"/> 3 | <input type="checkbox"/> 0 |

**Urine Test**      0Unexamined, reason \_\_\_\_\_  
1 Not Applicable

Date: |||YEAR|||MONTH|||DAY      Normal range Number: |||

| Item              | Result                                    |                                        | Result Interpretation      |                            |                            | Unexamined                 |
|-------------------|-------------------------------------------|----------------------------------------|----------------------------|----------------------------|----------------------------|----------------------------|
|                   | Measured Value                            | Unit                                   | Normal                     | Abnormal                   |                            |                            |
|                   |                                           |                                        |                            | No Clinical significance   | Clinical significance      |                            |
| Urine Protein     | <input type="checkbox"/> 1Not Applicable  | <input type="checkbox"/> 2Other: _____ | <input type="checkbox"/> 1 | <input type="checkbox"/> 2 | <input type="checkbox"/> 3 | <input type="checkbox"/> 0 |
| Urine Glucose     | <input type="checkbox"/> 1 mmol/L         | <input type="checkbox"/> 2Other: _____ | <input type="checkbox"/> 1 | <input type="checkbox"/> 2 | <input type="checkbox"/> 3 | <input type="checkbox"/> 0 |
| Urine PH value    | <input type="checkbox"/> 1 Not Applicable | <input type="checkbox"/> 2Other: _____ | <input type="checkbox"/> 1 | <input type="checkbox"/> 2 | <input type="checkbox"/> 3 | <input type="checkbox"/> 0 |
| Urine Erythrocyte | <input type="checkbox"/> 1Not Applicable  | <input type="checkbox"/> 2Other: _____ | <input type="checkbox"/> 1 | <input type="checkbox"/> 2 | <input type="checkbox"/> 3 | <input type="checkbox"/> 0 |
| Urine Leukocyte   | <input type="checkbox"/> 1Not Applicable  | <input type="checkbox"/> 2Other: _____ | <input type="checkbox"/> 1 | <input type="checkbox"/> 2 | <input type="checkbox"/> 3 | <input type="checkbox"/> 0 |
| Urine Ketone      | <input type="checkbox"/> 1Not Applicable  | <input type="checkbox"/> 2Other: _____ | <input type="checkbox"/> 1 | <input type="checkbox"/> 2 | <input type="checkbox"/> 3 | <input type="checkbox"/> 0 |

|                                    |                                             |
|------------------------------------|---------------------------------------------|
| Protocol Number: KY2020-29         | <b>Treatment</b>                            |
| Center Number  __ __ <br> __ __ __ | Subject Screening Number<br>Visit 2 (D4±1d) |

| <b>Coagulation Function</b> <input type="checkbox"/> Unexamined, reason _____  |                |                                                                               |                            |                            |                            |                            |
|--------------------------------------------------------------------------------|----------------|-------------------------------------------------------------------------------|----------------------------|----------------------------|----------------------------|----------------------------|
| Date:  __ __ __ YEAR __ __ MONTH __ __ DAY      Normal range Number:  __ __ __ |                |                                                                               |                            |                            |                            |                            |
| Item                                                                           | Result         |                                                                               | Result Interpretation      |                            |                            | Unexamined                 |
|                                                                                | Measured Value | Unit                                                                          | Normal                     | No Clinical significance   | Clinical significance      |                            |
| Prothrombin Time (PT)                                                          |                | <input type="checkbox"/> S <input type="checkbox"/> Other: _____              | <input type="checkbox"/> 1 | <input type="checkbox"/> 2 | <input type="checkbox"/> 3 | <input type="checkbox"/> 0 |
| Activated Partial Thromboplastin Time (APTT)                                   |                | <input type="checkbox"/> S <input type="checkbox"/> Other: _____              | <input type="checkbox"/> 1 | <input type="checkbox"/> 2 | <input type="checkbox"/> 3 | <input type="checkbox"/> 0 |
| Thrombin Time (TT)                                                             |                | <input type="checkbox"/> S <input type="checkbox"/> Other: _____              | <input type="checkbox"/> 1 | <input type="checkbox"/> 2 | <input type="checkbox"/> 3 | <input type="checkbox"/> 0 |
| Fibrinogen (Fbg)                                                               |                | <input type="checkbox"/> g/L <input type="checkbox"/> Other: _____            | <input type="checkbox"/> 1 | <input type="checkbox"/> 2 | <input type="checkbox"/> 3 | <input type="checkbox"/> 0 |
| International Normalized Ratio (INR)                                           |                | <input type="checkbox"/> Not Applicable <input type="checkbox"/> Other: _____ | <input type="checkbox"/> 1 | <input type="checkbox"/> 2 | <input type="checkbox"/> 3 | <input type="checkbox"/> 0 |

| <b>C-REACTIVE PROTEIN (CRP)</b> <input type="checkbox"/> Unexamined, reason _____ |                |                                                                     |                            |                            |                            |                            |
|-----------------------------------------------------------------------------------|----------------|---------------------------------------------------------------------|----------------------------|----------------------------|----------------------------|----------------------------|
| Date:  __ __ __ YEAR __ __ MONTH __ __ DAY      Normal range Number:  __ __ __    |                |                                                                     |                            |                            |                            |                            |
| Item                                                                              | Result         |                                                                     | Result Interpretation      |                            |                            | Unexamined                 |
|                                                                                   | Measured Value | Unit                                                                | Normal                     | No Clinical significance   | Clinical significance      |                            |
| C-REACTIVE PROTEIN (CRP)                                                          |                | <input type="checkbox"/> mg/L <input type="checkbox"/> Other: _____ | <input type="checkbox"/> 1 | <input type="checkbox"/> 2 | <input type="checkbox"/> 3 | <input type="checkbox"/> 0 |

| <b>Erythrocyte Sedimentation Rate (ESR)</b> <input type="checkbox"/> Unexamined, reason _____ |                |                                                                     |                            |                            |                            |                            |
|-----------------------------------------------------------------------------------------------|----------------|---------------------------------------------------------------------|----------------------------|----------------------------|----------------------------|----------------------------|
| Date:  __ __ __ YEAR __ __ MONTH __ __ DAY      Normal range Number:  __ __ __                |                |                                                                     |                            |                            |                            |                            |
| Item                                                                                          | Result         |                                                                     | Result Interpretation      |                            |                            | Unexamined                 |
|                                                                                               | Measured Value | Unit                                                                | Normal                     | No Clinical significance   | Clinical significance      |                            |
| Erythrocyte Sedimentation Rate (ESR)                                                          |                | <input type="checkbox"/> mm/h <input type="checkbox"/> Other: _____ | <input type="checkbox"/> 1 | <input type="checkbox"/> 2 | <input type="checkbox"/> 3 | <input type="checkbox"/> 0 |

| <b>TNF-α</b> <input type="checkbox"/> Unexamined, reason _____                 |                |                                                                      |                            |                            |                            |                            |
|--------------------------------------------------------------------------------|----------------|----------------------------------------------------------------------|----------------------------|----------------------------|----------------------------|----------------------------|
| Date:  __ __ __ YEAR __ __ MONTH __ __ DAY      Normal range Number:  __ __ __ |                |                                                                      |                            |                            |                            |                            |
| Item                                                                           | Result         |                                                                      | Result Interpretation      |                            |                            | Unexamined                 |
|                                                                                | Measured Value | Unit                                                                 | Normal                     | No Clinical significance   | Clinical significance      |                            |
| TNF-α                                                                          |                | <input type="checkbox"/> pg/mL <input type="checkbox"/> Other: _____ | <input type="checkbox"/> 1 | <input type="checkbox"/> 2 | <input type="checkbox"/> 3 | <input type="checkbox"/> 0 |

|                                    |                                             |
|------------------------------------|---------------------------------------------|
| Protocol Number: KY2020-29         | <b>Treatment</b>                            |
| Center Number  __ __ <br> __ __ __ | Subject Screening Number<br>Visit 2 (D4±1d) |

| <b>IL-6</b> <input type="checkbox"/> Unexamined, reason _____ |                |                                                                          |                                |                            |                            |
|---------------------------------------------------------------|----------------|--------------------------------------------------------------------------|--------------------------------|----------------------------|----------------------------|
| Date:  __ __ __ YEAR __ __ MONTH __ __ DAY                    |                |                                                                          | Normal range Number:  __ __ __ |                            |                            |
| Item                                                          | Result         |                                                                          | Result Interpretation          |                            |                            |
|                                                               | Measured Value | Unit                                                                     | Normal                         | Abnormal                   |                            |
| No Clinical significance                                      |                |                                                                          |                                | Clinical significance      |                            |
| IL-6                                                          |                | <input type="checkbox"/> 1 pg/mL <input type="checkbox"/> 2 Other: _____ | <input type="checkbox"/> 1     | <input type="checkbox"/> 2 | <input type="checkbox"/> 3 |

|                                                                                                                                                                                   |                     |
|-----------------------------------------------------------------------------------------------------------------------------------------------------------------------------------|---------------------|
| <b>Nucleic Acid Test of 2019-nCov</b> <input type="checkbox"/> Unexamined, reason _____                                                                                           |                     |
| <input type="checkbox"/> 1 Not Applicable                                                                                                                                         |                     |
| Sampling Part: <input type="checkbox"/> 1 Upper respiratory tract <input type="checkbox"/> 2 Lower respiratory tract                                                              |                     |
| Date:  __ __ __ YEAR __ __ MONTH __ __ DAY                                                                                                                                        | Date:  __ __: __ __ |
| Result : <input type="checkbox"/> 1 Negative <input type="checkbox"/> 2 Positive <input type="checkbox"/> 3 Unidentified <input type="checkbox"/> 4 Other , please describe _____ |                     |

|                                                                                                               |  |
|---------------------------------------------------------------------------------------------------------------|--|
| <b>Pulse oxygen saturation (without oxygen inhalation )</b> <input type="checkbox"/> Unexamined, reason _____ |  |
| Date:  __ __ __ YEAR __ __ MONTH __ __ DAY                                                                    |  |
| Measured Value: _____ % (Rest state)                                                                          |  |

| <b>Arterial blood gas analysis</b> <input type="checkbox"/> Unexamined, reason _____           |                |                                                                         |                                |                            |                            |                            |
|------------------------------------------------------------------------------------------------|----------------|-------------------------------------------------------------------------|--------------------------------|----------------------------|----------------------------|----------------------------|
| <input type="checkbox"/> 1 Not applicable                                                      |                |                                                                         |                                |                            |                            |                            |
| Oxygen inhalation: <input type="checkbox"/> 1 No <input type="checkbox"/> 2 Yes, FiO2: _____ % |                |                                                                         |                                |                            |                            |                            |
| Date:  __ __ __ YEAR __ __ MONTH __ __ DAY                                                     |                |                                                                         | Normal range Number:  __ __ __ |                            |                            |                            |
| Item                                                                                           | Measured Value | Unit                                                                    | Normal                         | Abnormal                   |                            | Unexamined                 |
|                                                                                                |                |                                                                         |                                | No Clinical significance   | Clinical significance      |                            |
| PaO2                                                                                           |                | <input type="checkbox"/> 1 mmHg <input type="checkbox"/> 2 Other: _____ | <input type="checkbox"/> 1     | <input type="checkbox"/> 2 | <input type="checkbox"/> 3 | <input type="checkbox"/> 0 |
| SaO2                                                                                           |                | <input type="checkbox"/> 1 % <input type="checkbox"/> 2 Other: _____    | <input type="checkbox"/> 1     | <input type="checkbox"/> 2 | <input type="checkbox"/> 3 | <input type="checkbox"/> 0 |

**If any adverse events have occurred since the last visit, please fill in the “adverse events” form. If there is medication combination, please fill in the “previous/combined medication” form; If there is combined non-drug therapy, please fill in the “combined non-drug therapy” form; If there is an out-of-plan inspection, please fill in the “out-of-plan inspection” form.**

|                            |                  |
|----------------------------|------------------|
| Protocol Number: KY2020-29 | <b>Treatment</b> |
| Center Number  __          | Visit 3 (D7±1d)  |

**Date of Current Visit:** |\_\_|\_|\_\_|\_|YEAR|\_\_|\_|MONTH|\_\_|\_|DAY

|                                                                      |                                                               |                    |                                                                                                                                                                                                                                |
|----------------------------------------------------------------------|---------------------------------------------------------------|--------------------|--------------------------------------------------------------------------------------------------------------------------------------------------------------------------------------------------------------------------------|
| <b>Vital Signs</b> <input type="checkbox"/> Unexamined, reason _____ |                                                               |                    |                                                                                                                                                                                                                                |
| Date                                                                 | __ _ __ _ YEAR __ _ MONTH __ _ DAY                            |                    |                                                                                                                                                                                                                                |
| Daily maximum temperature                                            | __ _ _ .  __ _ °C                                             | Measurement method | <input type="checkbox"/> 1 Axilla <input type="checkbox"/> 2 Oral <input type="checkbox"/> 3 Anus<br><input type="checkbox"/> 4 Ear <input type="checkbox"/> 5 Unknown <input type="checkbox"/> 6 Other, please describe _____ |
| Respiratory                                                          | __ _ _ times/min                                              | Pulse              | __ _ _ times/min                                                                                                                                                                                                               |
| Blood pressure                                                       | __ _ _ _ / __ _ _ _  mmHg (Systolic/diastolic blood pressure) |                    |                                                                                                                                                                                                                                |

|                                                                                                                                                                     |                                    |
|---------------------------------------------------------------------------------------------------------------------------------------------------------------------|------------------------------------|
| <b>Respiratory symptoms</b> <input type="checkbox"/> Unexamined, reason _____                                                                                       |                                    |
| Date:                                                                                                                                                               | __ _ __ _ YEAR __ _ MONTH __ _ DAY |
| Whether the subject has respiratory symptoms or not: <input type="checkbox"/> 0 NO <input type="checkbox"/> 1 YES, please describe: _____                           |                                    |
| Result: <input type="checkbox"/> 1 Normal <input type="checkbox"/> 2 Abnormal, No Clinical significance <input type="checkbox"/> 3 Abnormal, Clinically significant |                                    |

| <b>Blood Count</b> <input type="checkbox"/> Unexamined, reason _____ |                |                                                                                        |      |                                |                            |                            |                            |
|----------------------------------------------------------------------|----------------|----------------------------------------------------------------------------------------|------|--------------------------------|----------------------------|----------------------------|----------------------------|
| Date:                                                                |                | __ _ __ _ YEAR __ _ MONTH __ _ DAY                                                     |      | Normal range Number:  __ _ _ _ |                            |                            |                            |
| Item                                                                 | Measured Value | Result                                                                                 | Unit | Result Interpretation          |                            |                            | Unexamined                 |
|                                                                      |                |                                                                                        |      | Normal                         | Abnormal                   |                            |                            |
|                                                                      |                |                                                                                        |      | No Clinical significance       | Clinically significant     |                            |                            |
| Red Blood Cell (RBC)                                                 |                | <input type="checkbox"/> 1 10 <sup>12</sup> /L <input type="checkbox"/> 2 Other: _____ |      | <input type="checkbox"/> 1     | <input type="checkbox"/> 2 | <input type="checkbox"/> 3 | <input type="checkbox"/> 0 |
| White Blood Cell                                                     |                | <input type="checkbox"/> 1 10 <sup>9</sup> /L <input type="checkbox"/> 2 Other: _____  |      | <input type="checkbox"/> 1     | <input type="checkbox"/> 2 | <input type="checkbox"/> 3 | <input type="checkbox"/> 0 |
| Hemoglobin (Hb)                                                      |                | <input type="checkbox"/> 1 g/L <input type="checkbox"/> 2 Other: _____                 |      | <input type="checkbox"/> 1     | <input type="checkbox"/> 2 | <input type="checkbox"/> 3 | <input type="checkbox"/> 0 |
| Platelet (PLT)                                                       |                | <input type="checkbox"/> 1 10 <sup>9</sup> /L <input type="checkbox"/> 2 Other: _____  |      | <input type="checkbox"/> 1     | <input type="checkbox"/> 2 | <input type="checkbox"/> 3 | <input type="checkbox"/> 0 |
| Neutrophil (ANC)                                                     |                | <input type="checkbox"/> 1 10 <sup>9</sup> /L <input type="checkbox"/> 2 Other: _____  |      | <input type="checkbox"/> 1     | <input type="checkbox"/> 2 | <input type="checkbox"/> 3 | <input type="checkbox"/> 0 |
| Lymphocyte (LY)                                                      |                | <input type="checkbox"/> 1 10 <sup>9</sup> /L <input type="checkbox"/> 2 Other: _____  |      | <input type="checkbox"/> 1     | <input type="checkbox"/> 2 | <input type="checkbox"/> 3 | <input type="checkbox"/> 0 |
| Monocyte (MO)                                                        |                | <input type="checkbox"/> 1 10 <sup>9</sup> /L <input type="checkbox"/> 2 Other: _____  |      | <input type="checkbox"/> 1     | <input type="checkbox"/> 2 | <input type="checkbox"/> 3 | <input type="checkbox"/> 0 |
| Eosinophil (EO)                                                      |                | <input type="checkbox"/> 1 10 <sup>9</sup> /L <input type="checkbox"/> 2 Other: _____  |      | <input type="checkbox"/> 1     | <input type="checkbox"/> 2 | <input type="checkbox"/> 3 | <input type="checkbox"/> 0 |
| Basophil (BA)                                                        |                | <input type="checkbox"/> 1 10 <sup>9</sup> /L <input type="checkbox"/> 2 Other: _____  |      | <input type="checkbox"/> 1     | <input type="checkbox"/> 2 | <input type="checkbox"/> 3 | <input type="checkbox"/> 0 |

|                                                                             |
|-----------------------------------------------------------------------------|
| <b>Blood Biochemistry</b> <input type="checkbox"/> Unexamined, reason _____ |
|-----------------------------------------------------------------------------|

|                            |                              |
|----------------------------|------------------------------|
| Protocol Number: KY2020-29 | <b>Treatment</b>             |
| Center Number  __          | Subject Screening Number  __ |
| Visit 3 (D7±1d)            |                              |

Date|\_\_|\_\_|\_\_|YEAR|\_\_|\_\_|MONTH|\_\_|\_\_|DAY      Normal range Number: |\_\_|\_\_|\_\_|

| Item                                   | Result         |                                                                                                | Result Interpretation                 |                                       |                                       | Unexamined                            |
|----------------------------------------|----------------|------------------------------------------------------------------------------------------------|---------------------------------------|---------------------------------------|---------------------------------------|---------------------------------------|
|                                        | Measured Value | Unit                                                                                           | Normal                                | Abnormal                              |                                       |                                       |
|                                        |                |                                                                                                |                                       | No Clinical significance              | Clinically significant                |                                       |
| Glutamic-pyruvic transaminase (ALT)    |                | <input type="checkbox"/> <sub>1</sub> U/L <input type="checkbox"/> <sub>2</sub> Other: ____    | <input type="checkbox"/> <sub>1</sub> | <input type="checkbox"/> <sub>2</sub> | <input type="checkbox"/> <sub>3</sub> | <input type="checkbox"/> <sub>0</sub> |
| Glutamic-oxalacetic transaminase (AST) |                | <input type="checkbox"/> <sub>1</sub> U/L <input type="checkbox"/> <sub>2</sub> Other: ____    | <input type="checkbox"/> <sub>1</sub> | <input type="checkbox"/> <sub>2</sub> | <input type="checkbox"/> <sub>3</sub> | <input type="checkbox"/> <sub>0</sub> |
| Total Bilirubin (TBIL)                 |                | <input type="checkbox"/> <sub>1</sub> µmol/L <input type="checkbox"/> <sub>2</sub> Other: ____ | <input type="checkbox"/> <sub>1</sub> | <input type="checkbox"/> <sub>2</sub> | <input type="checkbox"/> <sub>3</sub> | <input type="checkbox"/> <sub>0</sub> |
| Albumin (ALB)                          |                | <input type="checkbox"/> <sub>1</sub> g/L <input type="checkbox"/> <sub>2</sub> Other: ____    | <input type="checkbox"/> <sub>1</sub> | <input type="checkbox"/> <sub>2</sub> | <input type="checkbox"/> <sub>3</sub> | <input type="checkbox"/> <sub>0</sub> |
| γ- glutamyl transpeptidase (GGT)       |                | <input type="checkbox"/> <sub>1</sub> U/L <input type="checkbox"/> <sub>2</sub> Other: ____    | <input type="checkbox"/> <sub>1</sub> | <input type="checkbox"/> <sub>2</sub> | <input type="checkbox"/> <sub>3</sub> | <input type="checkbox"/> <sub>0</sub> |
| Lactic dehydrogenase (LDH)             |                | <input type="checkbox"/> <sub>1</sub> U/L <input type="checkbox"/> <sub>2</sub> Other: ____    | <input type="checkbox"/> <sub>1</sub> | <input type="checkbox"/> <sub>2</sub> | <input type="checkbox"/> <sub>3</sub> | <input type="checkbox"/> <sub>0</sub> |
| Creatine kinase (CK)                   |                | <input type="checkbox"/> <sub>1</sub> U/L <input type="checkbox"/> <sub>2</sub> Other: ____    | <input type="checkbox"/> <sub>1</sub> | <input type="checkbox"/> <sub>2</sub> | <input type="checkbox"/> <sub>3</sub> | <input type="checkbox"/> <sub>0</sub> |
| Creatine kinase isoenzyme (CK-MB)      |                | <input type="checkbox"/> <sub>1</sub> U/L <input type="checkbox"/> <sub>2</sub> Other: ____    | <input type="checkbox"/> <sub>1</sub> | <input type="checkbox"/> <sub>2</sub> | <input type="checkbox"/> <sub>3</sub> | <input type="checkbox"/> <sub>0</sub> |
| Blood urea nitrogen (BUN)              |                | <input type="checkbox"/> <sub>1</sub> mmol/L <input type="checkbox"/> <sub>2</sub> Other: ____ | <input type="checkbox"/> <sub>1</sub> | <input type="checkbox"/> <sub>2</sub> | <input type="checkbox"/> <sub>3</sub> | <input type="checkbox"/> <sub>0</sub> |
| Urea (Urea)                            |                | <input type="checkbox"/> <sub>1</sub> mmol/L <input type="checkbox"/> <sub>2</sub> Other: ____ | <input type="checkbox"/> <sub>1</sub> | <input type="checkbox"/> <sub>2</sub> | <input type="checkbox"/> <sub>3</sub> | <input type="checkbox"/> <sub>0</sub> |
| Serum creatinine (CR)                  |                | <input type="checkbox"/> <sub>1</sub> µmol/L <input type="checkbox"/> <sub>2</sub> Other: ____ | <input type="checkbox"/> <sub>1</sub> | <input type="checkbox"/> <sub>2</sub> | <input type="checkbox"/> <sub>3</sub> | <input type="checkbox"/> <sub>0</sub> |

**Coagulation Function**      <sub>0</sub>Unexamined, reason \_\_\_\_\_

Date: |\_\_|\_\_|\_\_|YEAR|\_\_|\_\_|MONTH|\_\_|\_\_|DAY      Normal range Number: |\_\_|\_\_|\_\_|

| Item                                         | Result         |                                                                                                        | Result Interpretation                 |                                       |                                       | Unexamined                            |
|----------------------------------------------|----------------|--------------------------------------------------------------------------------------------------------|---------------------------------------|---------------------------------------|---------------------------------------|---------------------------------------|
|                                              | Measured Value | Unit                                                                                                   | Normal                                | Abnormal                              |                                       |                                       |
|                                              |                |                                                                                                        |                                       | No Clinical significance              | Clinically significant                |                                       |
| Prothrombin Time (PT)                        |                | <input type="checkbox"/> <sub>1</sub> S <input type="checkbox"/> <sub>2</sub> Other: ____              | <input type="checkbox"/> <sub>1</sub> | <input type="checkbox"/> <sub>2</sub> | <input type="checkbox"/> <sub>3</sub> | <input type="checkbox"/> <sub>0</sub> |
| Activated Partial Thromboplastin Time (APTT) |                | <input type="checkbox"/> <sub>1</sub> S <input type="checkbox"/> <sub>2</sub> Other: ____              | <input type="checkbox"/> <sub>1</sub> | <input type="checkbox"/> <sub>2</sub> | <input type="checkbox"/> <sub>3</sub> | <input type="checkbox"/> <sub>0</sub> |
| Thrombin Time (TT)                           |                | <input type="checkbox"/> <sub>1</sub> S <input type="checkbox"/> <sub>2</sub> Other: ____              | <input type="checkbox"/> <sub>1</sub> | <input type="checkbox"/> <sub>2</sub> | <input type="checkbox"/> <sub>3</sub> | <input type="checkbox"/> <sub>0</sub> |
| Fibrinogen (Fbg)                             |                | <input type="checkbox"/> <sub>1</sub> g/L <input type="checkbox"/> <sub>2</sub> Other: ____            | <input type="checkbox"/> <sub>1</sub> | <input type="checkbox"/> <sub>2</sub> | <input type="checkbox"/> <sub>3</sub> | <input type="checkbox"/> <sub>0</sub> |
| International Normalized Ratio (INR)         |                | <input type="checkbox"/> <sub>1</sub> Not Applicable <input type="checkbox"/> <sub>2</sub> Other: ____ | <input type="checkbox"/> <sub>1</sub> | <input type="checkbox"/> <sub>2</sub> | <input type="checkbox"/> <sub>3</sub> | <input type="checkbox"/> <sub>0</sub> |

**C-REACTIVE PROTEIN (CRP)**      <sub>0</sub>Unexamined, reason \_\_\_\_\_

Date: |\_\_|\_\_|\_\_|YEAR|\_\_|\_\_|MONTH|\_\_|\_\_|DAY      Normal range Number: |\_\_|\_\_|\_\_|



|                                    |                  |
|------------------------------------|------------------|
| Protocol Number: KY2020-29         | <b>Treatment</b> |
| Center Number <input type="text"/> | Visit 3 (D7±1d)  |

| Item                        | Result         |                                                                         | Result Interpretation      |                            |                            |
|-----------------------------|----------------|-------------------------------------------------------------------------|----------------------------|----------------------------|----------------------------|
|                             | Measured Value | Unit                                                                    | Normal                     | Abnormal                   |                            |
| No Clinical significance    |                |                                                                         |                            | Clinically significant     |                            |
| C-REACTIVE PROTEIN<br>(CRP) |                | <input type="checkbox"/> 1 mg/L <input type="checkbox"/> 2 Other: _____ | <input type="checkbox"/> 1 | <input type="checkbox"/> 2 | <input type="checkbox"/> 3 |

**Erythrocyte Sedimentation Rate (ESR)**    0 Unexamined, reason \_\_\_\_\_

Date : |||YEAR|||MONTH|||DAY    Normal range

Number:

| Item                                    | Result         |                                                                         | Result Interpretation      |                            |                            |
|-----------------------------------------|----------------|-------------------------------------------------------------------------|----------------------------|----------------------------|----------------------------|
|                                         | Measured Value | Unit                                                                    | Normal                     | Abnormal                   |                            |
| No Clinical significance                |                |                                                                         |                            | Clinically significant     |                            |
| Erythrocyte Sedimentation Rate<br>(ESR) |                | <input type="checkbox"/> 1 mm/h <input type="checkbox"/> 2 Other: _____ | <input type="checkbox"/> 1 | <input type="checkbox"/> 2 | <input type="checkbox"/> 3 |

**TNF- $\alpha$**     0 Unexamined, reason \_\_\_\_\_

Date : |||YEAR|||MONTH|||DAY    Normal range

Number:

| Item                     | Result         |                                                                          | Result Interpretation      |                            |                            |
|--------------------------|----------------|--------------------------------------------------------------------------|----------------------------|----------------------------|----------------------------|
|                          | Measured Value | Unit                                                                     | Normal                     | Abnormal                   |                            |
| No Clinical significance |                |                                                                          |                            | Clinically significant     |                            |
| TNF- $\alpha$            |                | <input type="checkbox"/> 1 pg/mL <input type="checkbox"/> 2 Other: _____ | <input type="checkbox"/> 1 | <input type="checkbox"/> 2 | <input type="checkbox"/> 3 |

**IL-6**    0 Unexamined, reason \_\_\_\_\_

Date : |||YEAR|||MONTH|||DAY    Normal range

Number:

| Item                     | Result         |                                                                          | Result Interpretation      |                            |                            |
|--------------------------|----------------|--------------------------------------------------------------------------|----------------------------|----------------------------|----------------------------|
|                          | Measured Value | Unit                                                                     | Normal                     | Abnormal                   |                            |
| No Clinical significance |                |                                                                          |                            | Clinically significant     |                            |
| IL-6                     |                | <input type="checkbox"/> 1 pg/mL <input type="checkbox"/> 2 Other: _____ | <input type="checkbox"/> 1 | <input type="checkbox"/> 2 | <input type="checkbox"/> 3 |

**Nucleic Acid Test of 2019-nCov**    0 Unexamined, reason \_\_\_\_\_

Sampling Part (multiple choice):    1 Upper respiratory tract    2 Lower respiratory tract

|                         |                                                                                                                                                                                                                                                                                                                                                                         |
|-------------------------|-------------------------------------------------------------------------------------------------------------------------------------------------------------------------------------------------------------------------------------------------------------------------------------------------------------------------------------------------------------------------|
| Upper respiratory tract | Date: <input type="text"/>   <input type="text"/>   <input type="text"/>  YEAR  <input type="text"/>   <input type="text"/>  MONTH  <input type="text"/>   <input type="text"/>  DAY<br>Result: <input type="checkbox"/> 1 Negative <input type="checkbox"/> 2 Positive <input type="checkbox"/> 3 Unidentified <input type="checkbox"/> 4 Other, please describe _____ |
|-------------------------|-------------------------------------------------------------------------------------------------------------------------------------------------------------------------------------------------------------------------------------------------------------------------------------------------------------------------------------------------------------------------|

|                            |                  |
|----------------------------|------------------|
| Protocol Number: KY2020-29 | <b>Treatment</b> |
| Center Number [ ] [ ]      | Visit 3 (D7±1d)  |

|                         |                                                                                                                                                                                                                                                                                          |
|-------------------------|------------------------------------------------------------------------------------------------------------------------------------------------------------------------------------------------------------------------------------------------------------------------------------------|
| Lower respiratory tract | Date: [ ] [ ] [ ] [ ]  YEAR  [ ] [ ]  MONTH  [ ] [ ]  DAY<br>Result: <input type="checkbox"/> <sub>1</sub> Negative <input type="checkbox"/> <sub>2</sub> Positive <input type="checkbox"/> <sub>3</sub> Unidentified <input type="checkbox"/> <sub>4</sub> Other, please describe _____ |
| Result                  | <input type="checkbox"/> <sub>1</sub> Negative <input type="checkbox"/> <sub>2</sub> Positive <input type="checkbox"/> <sub>3</sub> Unidentified <input type="checkbox"/> <sub>4</sub> Other, please describe _____                                                                      |

|                                                                                                                           |
|---------------------------------------------------------------------------------------------------------------------------|
| <b>Pulse oxygen saturation (without oxygen inhalation )</b> <input type="checkbox"/> <sub>0</sub> Unexamined, reason_____ |
| Date: [ ] [ ] [ ] [ ]  YEAR  [ ] [ ]  MONTH  [ ] [ ]  DAY                                                                 |
| Measured Value: _____ % (Rest state)                                                                                      |

| <b>Arterial blood gas analysis</b> <input type="checkbox"/> <sub>0</sub> Unexamined, reason_____ <input type="checkbox"/> <sub>1</sub> Not applicable |                |                                                                                               |                                       |                                       |                                       |                                       |
|-------------------------------------------------------------------------------------------------------------------------------------------------------|----------------|-----------------------------------------------------------------------------------------------|---------------------------------------|---------------------------------------|---------------------------------------|---------------------------------------|
| Oxygen inhalation: <input type="checkbox"/> <sub>1</sub> No <input type="checkbox"/> <sub>2</sub> Yes, FIO <sub>2</sub> : _____ %                     |                |                                                                                               |                                       |                                       |                                       |                                       |
| Date: [ ] [ ] [ ] [ ]  YEAR  [ ] [ ]  MONTH  [ ] [ ]  DAY                                                                                             |                |                                                                                               |                                       |                                       |                                       |                                       |
| Normal range Number: [ ] [ ] [ ] [ ]                                                                                                                  |                |                                                                                               |                                       |                                       |                                       |                                       |
| Item                                                                                                                                                  | Result         |                                                                                               | Result Interpretation                 |                                       |                                       | Unexamined                            |
|                                                                                                                                                       | Measured Value | Unit                                                                                          | Normal                                | Abnormal                              |                                       |                                       |
|                                                                                                                                                       |                |                                                                                               |                                       |                                       |                                       | No Clinical significance              |
| PaO <sub>2</sub>                                                                                                                                      |                | <input type="checkbox"/> <sub>1</sub> mmHg <input type="checkbox"/> <sub>2</sub> Other: _____ | <input type="checkbox"/> <sub>1</sub> | <input type="checkbox"/> <sub>2</sub> | <input type="checkbox"/> <sub>3</sub> | <input type="checkbox"/> <sub>0</sub> |
| SaO <sub>2</sub>                                                                                                                                      |                | <input type="checkbox"/> <sub>1</sub> % <input type="checkbox"/> <sub>2</sub> Other: _____    | <input type="checkbox"/> <sub>1</sub> | <input type="checkbox"/> <sub>2</sub> | <input type="checkbox"/> <sub>3</sub> | <input type="checkbox"/> <sub>0</sub> |

|                                                                                         |                                                                                                                                                                                                                                                                                                                                                                                                                                                                                                                                                                                                                              |
|-----------------------------------------------------------------------------------------|------------------------------------------------------------------------------------------------------------------------------------------------------------------------------------------------------------------------------------------------------------------------------------------------------------------------------------------------------------------------------------------------------------------------------------------------------------------------------------------------------------------------------------------------------------------------------------------------------------------------------|
| <b>Clinical status</b> <input type="checkbox"/> <sub>0</sub> No evaluation, reason_____ |                                                                                                                                                                                                                                                                                                                                                                                                                                                                                                                                                                                                                              |
| Date:                                                                                   | [ ] [ ] [ ] [ ]  YEAR  [ ] [ ]  MONTH  [ ] [ ]  DAY                                                                                                                                                                                                                                                                                                                                                                                                                                                                                                                                                                          |
| Result                                                                                  | <input type="checkbox"/> <sub>1</sub> Level 1: discharge<br><input type="checkbox"/> <sub>2</sub> Level 2: hospitalization, oxygen therapy is not required<br><input type="checkbox"/> <sub>3</sub> Level 3: hospitalization, require oxygen therapy<br><input type="checkbox"/> <sub>4</sub> Level 4:ICU/ hospitalization, require noninvasive ventilation (NIV)/ High flow nasal catheter oxygen therapy (HFNC)<br><input type="checkbox"/> <sub>5</sub> Level 5:ICU, require extracorporeal membrane oxygenation (ECMO)and/or invasive mechanical ventilation(IMV)<br><input type="checkbox"/> <sub>6</sub> Level 6:Death |

**If any adverse events have occurred since the last visit, please fill in the “adverse events” form. If there is medication combination, please fill in the “previous/combined medication” form; If there is combined non-drug therapy, please fill in the “combined non-drug therapy” form; If there is an out-of-plan inspection, please fill in the “out-of-plan inspection” form.**

|                            |                              |
|----------------------------|------------------------------|
| Protocol Number: KY2020-29 | <b>Treatment</b>             |
| Center Number  __          | Subject Screening Number  __ |
| Visit 4 (D10±1d)           |                              |

**Date of Current Visit:** |\_\_| |\_\_| |\_\_| |YEAR|\_\_| |\_\_| |MONTH|\_\_| |\_\_| |DAY

|                                                                      |                                                                         |                    |                                                                                                                                                                                                                                |
|----------------------------------------------------------------------|-------------------------------------------------------------------------|--------------------|--------------------------------------------------------------------------------------------------------------------------------------------------------------------------------------------------------------------------------|
| <b>Vital Signs</b> <input type="checkbox"/> Unexamined, reason _____ |                                                                         |                    |                                                                                                                                                                                                                                |
| Date                                                                 | __   __   __   YEAR __   __   MONTH __   __   DAY                       |                    |                                                                                                                                                                                                                                |
| Daily maximum temperature                                            | __   __   . __  °C                                                      | Measurement method | <input type="checkbox"/> 1 Axilla <input type="checkbox"/> 2 Oral <input type="checkbox"/> 3 Anus<br><input type="checkbox"/> 4 Ear <input type="checkbox"/> 5 Unknown <input type="checkbox"/> 6 Other, please describe _____ |
| Respiratory                                                          | __   __   times/min                                                     | Pulse              | __   __   __   times/min                                                                                                                                                                                                       |
| Blood pressure                                                       | __   __   __  /  __   __   __  mmHg (Systolic/diastolic blood pressure) |                    |                                                                                                                                                                                                                                |

|                                                                                                                                                                     |                                                   |
|---------------------------------------------------------------------------------------------------------------------------------------------------------------------|---------------------------------------------------|
| <b>Respiratory symptoms</b> <input type="checkbox"/> Unexamined, reason _____                                                                                       |                                                   |
| Date:                                                                                                                                                               | __   __   __   YEAR __   __   MONTH __   __   DAY |
| Whether the subject has respiratory symptoms or not: <input type="checkbox"/> 0 NO <input type="checkbox"/> 1 YES, please describe: _____                           |                                                   |
| Result: <input type="checkbox"/> 1 Normal <input type="checkbox"/> 2 Abnormal, No Clinical significance <input type="checkbox"/> 3 Abnormal, Clinically significant |                                                   |

| <b>Blood Count</b> <input type="checkbox"/> Unexamined, reason _____ |                                                   |                                                                                        |                                    |                            |                            |                            |
|----------------------------------------------------------------------|---------------------------------------------------|----------------------------------------------------------------------------------------|------------------------------------|----------------------------|----------------------------|----------------------------|
| Date:                                                                | __   __   __   YEAR __   __   MONTH __   __   DAY |                                                                                        | Normal range Number:  __   __   __ |                            |                            |                            |
| Item                                                                 | Result                                            |                                                                                        | Result Interpretation              |                            |                            | Unexamined                 |
|                                                                      | Measured Value                                    | Unit                                                                                   | Normal                             | Abnormal                   |                            |                            |
|                                                                      |                                                   |                                                                                        |                                    | No Clinical significance   | Clinically significant     |                            |
| Red Blood Cell (RBC)                                                 |                                                   | <input type="checkbox"/> 1 10 <sup>12</sup> /L <input type="checkbox"/> 2 Other: _____ | <input type="checkbox"/> 1         | <input type="checkbox"/> 2 | <input type="checkbox"/> 3 | <input type="checkbox"/> 0 |
| White Blood Cell                                                     |                                                   | <input type="checkbox"/> 1 10 <sup>9</sup> /L <input type="checkbox"/> 2 Other: _____  | <input type="checkbox"/> 1         | <input type="checkbox"/> 2 | <input type="checkbox"/> 3 | <input type="checkbox"/> 0 |
| Hemoglobin (Hb)                                                      |                                                   | <input type="checkbox"/> 1 g/L <input type="checkbox"/> 2 Other: _____                 | <input type="checkbox"/> 1         | <input type="checkbox"/> 2 | <input type="checkbox"/> 3 | <input type="checkbox"/> 0 |
| Platelet (PLT)                                                       |                                                   | <input type="checkbox"/> 1 10 <sup>9</sup> /L <input type="checkbox"/> 2 Other: _____  | <input type="checkbox"/> 1         | <input type="checkbox"/> 2 | <input type="checkbox"/> 3 | <input type="checkbox"/> 0 |
| Neutrophil (ANC)                                                     |                                                   | <input type="checkbox"/> 1 10 <sup>9</sup> /L <input type="checkbox"/> 2 Other: _____  | <input type="checkbox"/> 1         | <input type="checkbox"/> 2 | <input type="checkbox"/> 3 | <input type="checkbox"/> 0 |
| Lymphocyte (LY)                                                      |                                                   | <input type="checkbox"/> 1 10 <sup>9</sup> /L <input type="checkbox"/> 2 Other: _____  | <input type="checkbox"/> 1         | <input type="checkbox"/> 2 | <input type="checkbox"/> 3 | <input type="checkbox"/> 0 |
| Monocyte (MO)                                                        |                                                   | <input type="checkbox"/> 1 10 <sup>9</sup> /L <input type="checkbox"/> 2 Other: _____  | <input type="checkbox"/> 1         | <input type="checkbox"/> 2 | <input type="checkbox"/> 3 | <input type="checkbox"/> 0 |
| Eosinophil (EO)                                                      |                                                   | <input type="checkbox"/> 1 10 <sup>9</sup> /L <input type="checkbox"/> 2 Other: _____  | <input type="checkbox"/> 1         | <input type="checkbox"/> 2 | <input type="checkbox"/> 3 | <input type="checkbox"/> 0 |
| Basophil (BA)                                                        |                                                   | <input type="checkbox"/> 1 10 <sup>9</sup> /L <input type="checkbox"/> 2 Other: _____  | <input type="checkbox"/> 1         | <input type="checkbox"/> 2 | <input type="checkbox"/> 3 | <input type="checkbox"/> 0 |

|                                                                             |  |
|-----------------------------------------------------------------------------|--|
| <b>Blood Biochemistry</b> <input type="checkbox"/> Unexamined, reason _____ |  |
|-----------------------------------------------------------------------------|--|

|                            |                              |                  |
|----------------------------|------------------------------|------------------|
| Protocol Number: KY2020-29 |                              | <b>Treatment</b> |
| Center Number  __          | Subject Screening Number  __ | Visit 4 (D10±1d) |

Date|\_\_|\_\_|\_\_|YEAR|\_\_|\_\_|MONTH|\_\_|\_\_|DAY Normal range Number: |\_\_|

| Item                                   | Result         |                                                                                                | Result Interpretation                 |                                       |                                       | Unexamined                            |
|----------------------------------------|----------------|------------------------------------------------------------------------------------------------|---------------------------------------|---------------------------------------|---------------------------------------|---------------------------------------|
|                                        | Measured Value | Unit                                                                                           | Normal                                | Abnormal                              |                                       |                                       |
|                                        |                |                                                                                                |                                       | No Clinical significance              | Clinically significant                |                                       |
| Glutamic-pyruvic transaminase (ALT)    |                | <input type="checkbox"/> <sub>1</sub> U/L <input type="checkbox"/> <sub>2</sub> Other: ____    | <input type="checkbox"/> <sub>1</sub> | <input type="checkbox"/> <sub>2</sub> | <input type="checkbox"/> <sub>3</sub> | <input type="checkbox"/> <sub>0</sub> |
| Glutamic-oxalacetic transaminase (AST) |                | <input type="checkbox"/> <sub>1</sub> U/L <input type="checkbox"/> <sub>2</sub> Other: ____    | <input type="checkbox"/> <sub>1</sub> | <input type="checkbox"/> <sub>2</sub> | <input type="checkbox"/> <sub>3</sub> | <input type="checkbox"/> <sub>0</sub> |
| Total Bilirubin (TBIL)                 |                | <input type="checkbox"/> <sub>1</sub> µmol/L <input type="checkbox"/> <sub>2</sub> Other: ____ | <input type="checkbox"/> <sub>1</sub> | <input type="checkbox"/> <sub>2</sub> | <input type="checkbox"/> <sub>3</sub> | <input type="checkbox"/> <sub>0</sub> |
| Albumin (ALB)                          |                | <input type="checkbox"/> <sub>1</sub> g/L <input type="checkbox"/> <sub>2</sub> Other: ____    | <input type="checkbox"/> <sub>1</sub> | <input type="checkbox"/> <sub>2</sub> | <input type="checkbox"/> <sub>3</sub> | <input type="checkbox"/> <sub>0</sub> |
| γ- glutamyl transpeptidase (GGT)       |                | <input type="checkbox"/> <sub>1</sub> U/L <input type="checkbox"/> <sub>2</sub> Other: ____    | <input type="checkbox"/> <sub>1</sub> | <input type="checkbox"/> <sub>2</sub> | <input type="checkbox"/> <sub>3</sub> | <input type="checkbox"/> <sub>0</sub> |
| Lactic dehydrogenase (LDH)             |                | <input type="checkbox"/> <sub>1</sub> U/L <input type="checkbox"/> <sub>2</sub> Other: ____    | <input type="checkbox"/> <sub>1</sub> | <input type="checkbox"/> <sub>2</sub> | <input type="checkbox"/> <sub>3</sub> | <input type="checkbox"/> <sub>0</sub> |
| Creatine kinase (CK)                   |                | <input type="checkbox"/> <sub>1</sub> U/L <input type="checkbox"/> <sub>2</sub> Other: ____    | <input type="checkbox"/> <sub>1</sub> | <input type="checkbox"/> <sub>2</sub> | <input type="checkbox"/> <sub>3</sub> | <input type="checkbox"/> <sub>0</sub> |
| Creatine kinase isoenzyme (CK-MB)      |                | <input type="checkbox"/> <sub>1</sub> U/L <input type="checkbox"/> <sub>2</sub> Other: ____    | <input type="checkbox"/> <sub>1</sub> | <input type="checkbox"/> <sub>2</sub> | <input type="checkbox"/> <sub>3</sub> | <input type="checkbox"/> <sub>0</sub> |
| Blood urea nitrogen (BUN)              |                | <input type="checkbox"/> <sub>1</sub> mmol/L <input type="checkbox"/> <sub>2</sub> Other: ____ | <input type="checkbox"/> <sub>1</sub> | <input type="checkbox"/> <sub>2</sub> | <input type="checkbox"/> <sub>3</sub> | <input type="checkbox"/> <sub>0</sub> |
| Urea (Urea)                            |                | <input type="checkbox"/> <sub>1</sub> mmol/L <input type="checkbox"/> <sub>2</sub> Other: ____ | <input type="checkbox"/> <sub>1</sub> | <input type="checkbox"/> <sub>2</sub> | <input type="checkbox"/> <sub>3</sub> | <input type="checkbox"/> <sub>0</sub> |
| Serum creatinine (CR)                  |                | <input type="checkbox"/> <sub>1</sub> µmol/L <input type="checkbox"/> <sub>2</sub> Other: ____ | <input type="checkbox"/> <sub>1</sub> | <input type="checkbox"/> <sub>2</sub> | <input type="checkbox"/> <sub>3</sub> | <input type="checkbox"/> <sub>0</sub> |

**Coagulation Function** <sub>0</sub>Unexamined, reason\_\_\_\_\_

Date: |\_\_|\_\_|\_\_|YEAR|\_\_|\_\_|MONTH|\_\_|\_\_|DAY Normal range Number: |\_\_|

| Item                                         | Result         |                                                                                                        | Result Interpretation                 |                                       |                                       | Unexamined                            |
|----------------------------------------------|----------------|--------------------------------------------------------------------------------------------------------|---------------------------------------|---------------------------------------|---------------------------------------|---------------------------------------|
|                                              | Measured Value | Unit                                                                                                   | Normal                                | Abnormal                              |                                       |                                       |
|                                              |                |                                                                                                        |                                       | No Clinical significance              | Clinically significant                |                                       |
| Prothrombin Time (PT)                        |                | <input type="checkbox"/> <sub>1</sub> S <input type="checkbox"/> <sub>2</sub> Other: ____              | <input type="checkbox"/> <sub>1</sub> | <input type="checkbox"/> <sub>2</sub> | <input type="checkbox"/> <sub>3</sub> | <input type="checkbox"/> <sub>0</sub> |
| Activated Partial Thromboplastin Time (APTT) |                | <input type="checkbox"/> <sub>1</sub> S <input type="checkbox"/> <sub>2</sub> Other: ____              | <input type="checkbox"/> <sub>1</sub> | <input type="checkbox"/> <sub>2</sub> | <input type="checkbox"/> <sub>3</sub> | <input type="checkbox"/> <sub>0</sub> |
| Thrombin Time (TT)                           |                | <input type="checkbox"/> <sub>1</sub> S <input type="checkbox"/> <sub>2</sub> Other: ____              | <input type="checkbox"/> <sub>1</sub> | <input type="checkbox"/> <sub>2</sub> | <input type="checkbox"/> <sub>3</sub> | <input type="checkbox"/> <sub>0</sub> |
| Fibrinogen (Fbg)                             |                | <input type="checkbox"/> <sub>1</sub> g/L <input type="checkbox"/> <sub>2</sub> Other: ____            | <input type="checkbox"/> <sub>1</sub> | <input type="checkbox"/> <sub>2</sub> | <input type="checkbox"/> <sub>3</sub> | <input type="checkbox"/> <sub>0</sub> |
| International Normalized Ratio (INR)         |                | <input type="checkbox"/> <sub>1</sub> Not Applicable <input type="checkbox"/> <sub>2</sub> Other: ____ | <input type="checkbox"/> <sub>1</sub> | <input type="checkbox"/> <sub>2</sub> | <input type="checkbox"/> <sub>3</sub> | <input type="checkbox"/> <sub>0</sub> |

**C-REACTIVE PROTEIN (CRP)** <sub>0</sub>Unexamined, reason\_\_\_\_\_

Date: |\_\_|\_\_|\_\_|YEAR|\_\_|\_\_|MONTH|\_\_|\_\_|DAY Normal range Number: |\_\_|

|                                    |                                               |
|------------------------------------|-----------------------------------------------|
| Protocol Number: KY2020-29         | <b>Treatment</b>                              |
| Center Number <input type="text"/> | Subject Screening Number <input type="text"/> |
| Visit 4 (D10±1d)                   |                                               |

| Item                        | Result         |                                                                         | Result Interpretation      |                            |                            |
|-----------------------------|----------------|-------------------------------------------------------------------------|----------------------------|----------------------------|----------------------------|
|                             | Measured Value | Unit                                                                    | Normal                     | Abnormal                   |                            |
| C-REACTIVE PROTEIN<br>(CRP) |                |                                                                         |                            | No Clinical significance   | Clinically significant     |
|                             |                | <input type="checkbox"/> 1 mg/L <input type="checkbox"/> 2 Other: _____ | <input type="checkbox"/> 1 | <input type="checkbox"/> 2 | <input type="checkbox"/> 3 |

| <b>Erythrocyte Sedimentation Rate (ESR)</b> <input type="checkbox"/> 0 Unexamined, reason _____                                                                                                                                   |                |                                                                         |                            |                            |                            |
|-----------------------------------------------------------------------------------------------------------------------------------------------------------------------------------------------------------------------------------|----------------|-------------------------------------------------------------------------|----------------------------|----------------------------|----------------------------|
| Date: <input type="text"/>   <input type="text"/>   <input type="text"/>  YEAR  <input type="text"/>   <input type="text"/>  MONTH  <input type="text"/>   <input type="text"/>  DAY    Normal range Number: <input type="text"/> |                |                                                                         |                            |                            |                            |
| Item                                                                                                                                                                                                                              | Result         |                                                                         | Result Interpretation      |                            |                            |
|                                                                                                                                                                                                                                   | Measured Value | Unit                                                                    | Normal                     | Abnormal                   |                            |
| Erythrocyte Sedimentation Rate<br>(ESR)                                                                                                                                                                                           |                |                                                                         |                            | No Clinical significance   | Clinically significant     |
|                                                                                                                                                                                                                                   |                | <input type="checkbox"/> 1 mm/h <input type="checkbox"/> 2 Other: _____ | <input type="checkbox"/> 1 | <input type="checkbox"/> 2 | <input type="checkbox"/> 3 |

| <b>TNF-α</b> <input type="checkbox"/> 0 Unexamined, reason _____                                                                                                                                                                  |                |                                                                          |                            |                            |                            |
|-----------------------------------------------------------------------------------------------------------------------------------------------------------------------------------------------------------------------------------|----------------|--------------------------------------------------------------------------|----------------------------|----------------------------|----------------------------|
| Date: <input type="text"/>   <input type="text"/>   <input type="text"/>  YEAR  <input type="text"/>   <input type="text"/>  MONTH  <input type="text"/>   <input type="text"/>  DAY    Normal range Number: <input type="text"/> |                |                                                                          |                            |                            |                            |
| Item                                                                                                                                                                                                                              | Result         |                                                                          | Result Interpretation      |                            |                            |
|                                                                                                                                                                                                                                   | Measured Value | Unit                                                                     | Normal                     | Abnormal                   |                            |
| TNF-α                                                                                                                                                                                                                             |                |                                                                          |                            | No Clinical significance   | Clinically significant     |
|                                                                                                                                                                                                                                   |                | <input type="checkbox"/> 1 pg/mL <input type="checkbox"/> 2 Other: _____ | <input type="checkbox"/> 1 | <input type="checkbox"/> 2 | <input type="checkbox"/> 3 |

| <b>IL-6</b> <input type="checkbox"/> 0 Unexamined, reason _____                                                                                                                                                                   |                |                                                                          |                            |                            |                            |
|-----------------------------------------------------------------------------------------------------------------------------------------------------------------------------------------------------------------------------------|----------------|--------------------------------------------------------------------------|----------------------------|----------------------------|----------------------------|
| Date: <input type="text"/>   <input type="text"/>   <input type="text"/>  YEAR  <input type="text"/>   <input type="text"/>  MONTH  <input type="text"/>   <input type="text"/>  DAY    Normal range Number: <input type="text"/> |                |                                                                          |                            |                            |                            |
| Item                                                                                                                                                                                                                              | Result         |                                                                          | Result Interpretation      |                            |                            |
|                                                                                                                                                                                                                                   | Measured Value | Unit                                                                     | Normal                     | Abnormal                   |                            |
| IL-6                                                                                                                                                                                                                              |                |                                                                          |                            | No Clinical significance   | Clinically significant     |
|                                                                                                                                                                                                                                   |                | <input type="checkbox"/> 1 pg/mL <input type="checkbox"/> 2 Other: _____ | <input type="checkbox"/> 1 | <input type="checkbox"/> 2 | <input type="checkbox"/> 3 |

|                                                                                                                                        |                                                                                                                                                                                                                                                                                                                                                                         |
|----------------------------------------------------------------------------------------------------------------------------------------|-------------------------------------------------------------------------------------------------------------------------------------------------------------------------------------------------------------------------------------------------------------------------------------------------------------------------------------------------------------------------|
| <b>Nucleic Acid Test of 2019-nCov</b> <input type="checkbox"/> 0 Unexamined, reason _____                                              |                                                                                                                                                                                                                                                                                                                                                                         |
| Sampling Part (multiple choice): <input type="checkbox"/> 1 Upper respiratory tract <input type="checkbox"/> 2 Lower respiratory tract |                                                                                                                                                                                                                                                                                                                                                                         |
| Upper respiratory tract                                                                                                                | Date: <input type="text"/>   <input type="text"/>   <input type="text"/>  YEAR  <input type="text"/>   <input type="text"/>  MONTH  <input type="text"/>   <input type="text"/>  DAY<br>Result: <input type="checkbox"/> 1 Negative <input type="checkbox"/> 2 Positive <input type="checkbox"/> 3 Unidentified <input type="checkbox"/> 4 Other, please describe _____ |
| Lower respiratory tract                                                                                                                | Date: <input type="text"/>   <input type="text"/>   <input type="text"/>  YEAR  <input type="text"/>   <input type="text"/>  MONTH  <input type="text"/>   <input type="text"/>  DAY<br>Result: <input type="checkbox"/> 1 Negative <input type="checkbox"/> 2 Positive <input type="checkbox"/> 3 Unidentified <input type="checkbox"/> 4 Other, please describe _____ |
| Result                                                                                                                                 | <input type="checkbox"/> 1 Negative <input type="checkbox"/> 2 Positive <input type="checkbox"/> 3 Unidentified <input type="checkbox"/> 4 Other, please describe _____                                                                                                                                                                                                 |

|                            |                  |
|----------------------------|------------------|
| Protocol Number: KY2020-29 | <b>Treatment</b> |
| Center Number  __          | Visit 4 (D10±1d) |

|                                                                                                                 |
|-----------------------------------------------------------------------------------------------------------------|
| <b>Pulse oxygen saturation (without oxygen inhalation )</b> <input type="checkbox"/> 0 Unexamined, reason _____ |
| Date:  __ _ __ _ YEAR __ _ MONTH __ _ DAY                                                                       |
| Measured Value: _____% (Rest state)                                                                             |

| <b>Arterial blood gas analysis</b> <input type="checkbox"/> 0 Unexamined, reason _____<br><input type="checkbox"/> 1 Not applicable |                |                                                                         |                            |                                                       |                            |
|-------------------------------------------------------------------------------------------------------------------------------------|----------------|-------------------------------------------------------------------------|----------------------------|-------------------------------------------------------|----------------------------|
| Oxygen inhalation: <input type="checkbox"/> 1 No <input type="checkbox"/> 2 Yes, FiO2: _____%                                       |                |                                                                         |                            |                                                       |                            |
| Date:  __ _ __ _ YEAR __ _ MONTH __ _ DAY                                                                                           |                |                                                                         |                            |                                                       |                            |
| Normal range Number:  __ _ __ _                                                                                                     |                |                                                                         |                            |                                                       |                            |
| Item                                                                                                                                | Result         |                                                                         | Result Interpretation      |                                                       | Unexamined                 |
|                                                                                                                                     | Measured Value | Unit                                                                    | Normal                     | Abnormal                                              |                            |
|                                                                                                                                     |                |                                                                         |                            | No Clinical significance    Clinical significance     |                            |
| PaO2                                                                                                                                |                | <input type="checkbox"/> 1 mmHg <input type="checkbox"/> 2 Other: _____ | <input type="checkbox"/> 1 | <input type="checkbox"/> 2 <input type="checkbox"/> 3 | <input type="checkbox"/> 0 |
| SaO2                                                                                                                                |                | <input type="checkbox"/> 1 % <input type="checkbox"/> 2 Other: _____    | <input type="checkbox"/> 1 | <input type="checkbox"/> 2 <input type="checkbox"/> 3 | <input type="checkbox"/> 0 |

**If any adverse events have occurred since the last visit, please fill in the “adverse events” form. If there is medication combination, please fill in the “previous/combined medication” form; If there is combined non-drug therapy, please fill in the “combined non-drug therapy” form; If there is an out-of-plan inspection, please fill in the “out-of-plan inspection” form; If there is IMV/NIV、ECMO、HFNC、oxygen therapy, please fill in the “IMV/NIV、ECMO、HFNC、oxygen therapy” form.**

“

|                            |                                 |
|----------------------------|---------------------------------|
| Protocol Number: KY2020-29 | <b>Treatment</b>                |
| Center Number  __          | Subject Screening Number  _____ |
| Visit 5 (D14±1d)           |                                 |

**Date of Current Visit:** |\_\_|\_|\_|\_|YEAR|\_\_|\_|MONTH|\_\_|\_|DAY

**Vital Signs**      \_0 Unexamined, reason \_\_\_\_\_

|                           |                                                               |                    |                                                                                                                                                                                                                                      |
|---------------------------|---------------------------------------------------------------|--------------------|--------------------------------------------------------------------------------------------------------------------------------------------------------------------------------------------------------------------------------------|
| Date                      | __ _ _ _ YEAR __ _ MONTH __ _ DAY                             |                    |                                                                                                                                                                                                                                      |
| Daily maximum temperature | __ _ _ . _ _ °C                                               | Measurement method | <input type="checkbox"/> _1 Axilla <input type="checkbox"/> _2 Oral <input type="checkbox"/> _3 Anus<br><input type="checkbox"/> _4 Ear <input type="checkbox"/> _5 Unknown <input type="checkbox"/> _6 Other, please describe _____ |
| Respiratory Rate          | __ _ _ times/min                                              | Pulse              | __ _ _ times/min                                                                                                                                                                                                                     |
| Blood pressure            | __ _ _ _ / __ _ _ _  mmHg (Systolic/diastolic blood pressure) |                    |                                                                                                                                                                                                                                      |

**Respiratory symptoms**      \_0 Unexamined, reason \_\_\_\_\_

Date: |\_\_|\_|\_|\_|YEAR|\_\_|\_|MONTH|\_\_|\_|DAY

Whether the subject has respiratory symptoms or not: \_0 NO    \_1 YES, please describe: \_\_\_\_\_

Result: \_1 Normal    \_2 Abnormal, No Clinical significance    \_3 Abnormal, Clinically significant

**Blood Count**      \_0 Unexamined, reason \_\_\_\_\_

Date: |\_\_|\_|\_|\_|YEAR|\_\_|\_|MONTH|\_\_|\_|DAY      Normal range Number: |\_\_\_\_\_|

| Item                 | Result         |                                                                                          | Result Interpretation       |                             |                             | Unexamined                  |
|----------------------|----------------|------------------------------------------------------------------------------------------|-----------------------------|-----------------------------|-----------------------------|-----------------------------|
|                      | Measured Value | Unit                                                                                     | Normal                      | Abnormal                    |                             |                             |
|                      |                |                                                                                          |                             | No Clinical significance    | Clinically significant      |                             |
| Red Blood Cell (RBC) |                | <input type="checkbox"/> _1 10 <sup>12</sup> /L <input type="checkbox"/> _2 Other: _____ | <input type="checkbox"/> _1 | <input type="checkbox"/> _2 | <input type="checkbox"/> _3 | <input type="checkbox"/> _0 |
| White Blood Cell     |                | <input type="checkbox"/> _1 10 <sup>9</sup> /L <input type="checkbox"/> _2 Other: _____  | <input type="checkbox"/> _1 | <input type="checkbox"/> _2 | <input type="checkbox"/> _3 | <input type="checkbox"/> _0 |
| Hemoglobin (Hb)      |                | <input type="checkbox"/> _1 g/L <input type="checkbox"/> _2 Other: _____                 | <input type="checkbox"/> _1 | <input type="checkbox"/> _2 | <input type="checkbox"/> _3 | <input type="checkbox"/> _0 |
| Platelet (PLT)       |                | <input type="checkbox"/> _1 10 <sup>9</sup> /L <input type="checkbox"/> _2 Other: _____  | <input type="checkbox"/> _1 | <input type="checkbox"/> _2 | <input type="checkbox"/> _3 | <input type="checkbox"/> _0 |
| Neutrophil (ANC)     |                | <input type="checkbox"/> _1 10 <sup>9</sup> /L <input type="checkbox"/> _2 Other: _____  | <input type="checkbox"/> _1 | <input type="checkbox"/> _2 | <input type="checkbox"/> _3 | <input type="checkbox"/> _0 |
| Lymphocyte (LY)      |                | <input type="checkbox"/> _1 10 <sup>9</sup> /L <input type="checkbox"/> _2 Other: _____  | <input type="checkbox"/> _1 | <input type="checkbox"/> _2 | <input type="checkbox"/> _3 | <input type="checkbox"/> _0 |
| Monocyte (MO)        |                | <input type="checkbox"/> _1 10 <sup>9</sup> /L <input type="checkbox"/> _2 Other: _____  | <input type="checkbox"/> _1 | <input type="checkbox"/> _2 | <input type="checkbox"/> _3 | <input type="checkbox"/> _0 |
| Eosinophil (EO)      |                | <input type="checkbox"/> _1 10 <sup>9</sup> /L <input type="checkbox"/> _2 Other: _____  | <input type="checkbox"/> _1 | <input type="checkbox"/> _2 | <input type="checkbox"/> _3 | <input type="checkbox"/> _0 |
| Basophil (BA)        |                | <input type="checkbox"/> _1 10 <sup>9</sup> /L <input type="checkbox"/> _2 Other: _____  | <input type="checkbox"/> _1 | <input type="checkbox"/> _2 | <input type="checkbox"/> _3 | <input type="checkbox"/> _0 |

**Blood Biochemistry**      \_0 Unexamined, reason \_\_\_\_\_

Date |\_\_|\_|\_|\_|YEAR|\_\_|\_|MONTH|\_\_|\_|DAY      Normal range Number: |\_\_\_\_\_|

|                            |                              |
|----------------------------|------------------------------|
| Protocol Number: KY2020-29 | <b>Treatment</b>             |
| Center Number  __          | Subject Screening Number  __ |
| Visit 5 (D14±1d)           |                              |

| Item                                   | Result         |                                                                                                | Result Interpretation                 |                                       |                                       | Unexamined                            |
|----------------------------------------|----------------|------------------------------------------------------------------------------------------------|---------------------------------------|---------------------------------------|---------------------------------------|---------------------------------------|
|                                        | Measured Value | Unit                                                                                           | Normal                                | Abnormal                              |                                       |                                       |
|                                        |                |                                                                                                |                                       | No Clinical significance              | Clinically significant                |                                       |
| Glutamic-pyruvic transaminase (ALT)    |                | <input type="checkbox"/> <sub>1</sub> U/L <input type="checkbox"/> <sub>2</sub> Other: ____    | <input type="checkbox"/> <sub>1</sub> | <input type="checkbox"/> <sub>2</sub> | <input type="checkbox"/> <sub>3</sub> | <input type="checkbox"/> <sub>0</sub> |
| Glutamic-oxalacetic transaminase (AST) |                | <input type="checkbox"/> <sub>1</sub> U/L <input type="checkbox"/> <sub>2</sub> Other: ____    | <input type="checkbox"/> <sub>1</sub> | <input type="checkbox"/> <sub>2</sub> | <input type="checkbox"/> <sub>3</sub> | <input type="checkbox"/> <sub>0</sub> |
| Total Bilirubin (TBIL)                 |                | <input type="checkbox"/> <sub>1</sub> µmol/L <input type="checkbox"/> <sub>2</sub> Other: ____ | <input type="checkbox"/> <sub>1</sub> | <input type="checkbox"/> <sub>2</sub> | <input type="checkbox"/> <sub>3</sub> | <input type="checkbox"/> <sub>0</sub> |
| Albumin (ALB)                          |                | <input type="checkbox"/> <sub>1</sub> g/L <input type="checkbox"/> <sub>2</sub> Other: ____    | <input type="checkbox"/> <sub>1</sub> | <input type="checkbox"/> <sub>2</sub> | <input type="checkbox"/> <sub>3</sub> | <input type="checkbox"/> <sub>0</sub> |
| γ- glutamyl transpeptidase (GGT)       |                | <input type="checkbox"/> <sub>1</sub> U/L <input type="checkbox"/> <sub>2</sub> Other: ____    | <input type="checkbox"/> <sub>1</sub> | <input type="checkbox"/> <sub>2</sub> | <input type="checkbox"/> <sub>3</sub> | <input type="checkbox"/> <sub>0</sub> |
| Lactic dehydrogenase (LDH)             |                | <input type="checkbox"/> <sub>1</sub> U/L <input type="checkbox"/> <sub>2</sub> Other: ____    | <input type="checkbox"/> <sub>1</sub> | <input type="checkbox"/> <sub>2</sub> | <input type="checkbox"/> <sub>3</sub> | <input type="checkbox"/> <sub>0</sub> |
| Creatine kinase (CK)                   |                | <input type="checkbox"/> <sub>1</sub> U/L <input type="checkbox"/> <sub>2</sub> Other: ____    | <input type="checkbox"/> <sub>1</sub> | <input type="checkbox"/> <sub>2</sub> | <input type="checkbox"/> <sub>3</sub> | <input type="checkbox"/> <sub>0</sub> |
| Creatine kinase isoenzyme (CK-MB)      |                | <input type="checkbox"/> <sub>1</sub> U/L <input type="checkbox"/> <sub>2</sub> Other: ____    | <input type="checkbox"/> <sub>1</sub> | <input type="checkbox"/> <sub>2</sub> | <input type="checkbox"/> <sub>3</sub> | <input type="checkbox"/> <sub>0</sub> |
| Blood urea nitrogen (BUN)              |                | <input type="checkbox"/> <sub>1</sub> mmol/L <input type="checkbox"/> <sub>2</sub> Other: ____ | <input type="checkbox"/> <sub>1</sub> | <input type="checkbox"/> <sub>2</sub> | <input type="checkbox"/> <sub>3</sub> | <input type="checkbox"/> <sub>0</sub> |
| Urea (Urea)                            |                | <input type="checkbox"/> <sub>1</sub> mmol/L <input type="checkbox"/> <sub>2</sub> Other: ____ | <input type="checkbox"/> <sub>1</sub> | <input type="checkbox"/> <sub>2</sub> | <input type="checkbox"/> <sub>3</sub> | <input type="checkbox"/> <sub>0</sub> |
| Serum creatinine (CR)                  |                | <input type="checkbox"/> <sub>1</sub> µmol/L <input type="checkbox"/> <sub>2</sub> Other: ____ | <input type="checkbox"/> <sub>1</sub> | <input type="checkbox"/> <sub>2</sub> | <input type="checkbox"/> <sub>3</sub> | <input type="checkbox"/> <sub>0</sub> |

| <b>Coagulation Function</b> <input type="checkbox"/> <sub>0</sub> Unexamined, reason _____         |                |                                                                                                        |                                       |                                       |                                       |                                       |
|----------------------------------------------------------------------------------------------------|----------------|--------------------------------------------------------------------------------------------------------|---------------------------------------|---------------------------------------|---------------------------------------|---------------------------------------|
| Date:  __   __   __   YEAR   __   __   MONTH   __   __   DAY    Normal range Number:  __   __   __ |                |                                                                                                        |                                       |                                       |                                       |                                       |
| Item                                                                                               | Result         |                                                                                                        | Result Interpretation                 |                                       |                                       | Unexamined                            |
|                                                                                                    | Measured Value | Unit                                                                                                   | Normal                                | Abnormal                              |                                       |                                       |
|                                                                                                    |                |                                                                                                        |                                       | No Clinical significance              | Clinically significant                |                                       |
| Prothrombin Time (PT)                                                                              |                | <input type="checkbox"/> <sub>1</sub> S <input type="checkbox"/> <sub>2</sub> Other: ____              | <input type="checkbox"/> <sub>1</sub> | <input type="checkbox"/> <sub>2</sub> | <input type="checkbox"/> <sub>3</sub> | <input type="checkbox"/> <sub>0</sub> |
| Activated Partial Thromboplastin Time (APTT)                                                       |                | <input type="checkbox"/> <sub>1</sub> S <input type="checkbox"/> <sub>2</sub> Other: ____              | <input type="checkbox"/> <sub>1</sub> | <input type="checkbox"/> <sub>2</sub> | <input type="checkbox"/> <sub>3</sub> | <input type="checkbox"/> <sub>0</sub> |
| Thrombin Time (TT)                                                                                 |                | <input type="checkbox"/> <sub>1</sub> S <input type="checkbox"/> <sub>2</sub> Other: ____              | <input type="checkbox"/> <sub>1</sub> | <input type="checkbox"/> <sub>2</sub> | <input type="checkbox"/> <sub>3</sub> | <input type="checkbox"/> <sub>0</sub> |
| Fibrinogen (Fbg)                                                                                   |                | <input type="checkbox"/> <sub>1</sub> g/L <input type="checkbox"/> <sub>2</sub> Other: ____            | <input type="checkbox"/> <sub>1</sub> | <input type="checkbox"/> <sub>2</sub> | <input type="checkbox"/> <sub>3</sub> | <input type="checkbox"/> <sub>0</sub> |
| International Normalized Ratio (INR)                                                               |                | <input type="checkbox"/> <sub>1</sub> Not Applicable <input type="checkbox"/> <sub>2</sub> Other: ____ | <input type="checkbox"/> <sub>1</sub> | <input type="checkbox"/> <sub>2</sub> | <input type="checkbox"/> <sub>3</sub> | <input type="checkbox"/> <sub>0</sub> |

| <b>C-REACTIVE PROTEIN (CRP)</b> <input type="checkbox"/> <sub>0</sub> Unexamined, reason _____     |          |      |                       |          |  |  |
|----------------------------------------------------------------------------------------------------|----------|------|-----------------------|----------|--|--|
| Date:  __   __   __   YEAR   __   __   MONTH   __   __   DAY    Normal range Number:  __   __   __ |          |      |                       |          |  |  |
| Item                                                                                               | Result   |      | Result Interpretation |          |  |  |
|                                                                                                    | Measured | Unit | Normal                | Abnormal |  |  |
|                                                                                                    |          |      |                       |          |  |  |



|                            |                                                                  |
|----------------------------|------------------------------------------------------------------|
| Protocol Number: KY2020-29 | <b>Treatment</b>                                                 |
| Center Number [ ] [ ] [ ]  | Subject Screening Number [ ] [ ] [ ] [ ] [ ] [ ] [ ] [ ] [ ] [ ] |
| Visit 5 (D14±1d)           |                                                                  |

|                             |              |                                                                         |                            |                                 |                               |
|-----------------------------|--------------|-------------------------------------------------------------------------|----------------------------|---------------------------------|-------------------------------|
| C-REACTIVE PROTEIN<br>(CRP) | <b>Value</b> |                                                                         | <b>1</b>                   | <b>No Clinical significance</b> | <b>Clinically significant</b> |
|                             |              | <input type="checkbox"/> 1 mg/L <input type="checkbox"/> 2 Other: _____ | <input type="checkbox"/> 1 | <input type="checkbox"/> 2      | <input type="checkbox"/> 3    |

|                                                                                                 |                       |                                                                         |                              |                                 |                               |
|-------------------------------------------------------------------------------------------------|-----------------------|-------------------------------------------------------------------------|------------------------------|---------------------------------|-------------------------------|
| <b>Erythrocyte Sedimentation Rate (ESR)</b> <input type="checkbox"/> 0 Unexamined, reason _____ |                       |                                                                         |                              |                                 |                               |
| Date: [ ] [ ] [ ] [ ]   YEAR   [ ] [ ]   MONTH   [ ] [ ]   DAY                                  |                       |                                                                         |                              |                                 | Normal range                  |
| Number: [ ] [ ] [ ] [ ] [ ] [ ]                                                                 |                       |                                                                         |                              |                                 |                               |
| <b>Item</b>                                                                                     | <b>Result</b>         |                                                                         | <b>Result Interpretation</b> |                                 |                               |
| Erythrocyte Sedimentation Rate<br>(ESR)                                                         | <b>Measured Value</b> | <b>Unit</b>                                                             | <b>Normal</b>                | <b>Abnormal</b>                 |                               |
|                                                                                                 |                       |                                                                         |                              | <b>No Clinical significance</b> | <b>Clinically significant</b> |
|                                                                                                 |                       | <input type="checkbox"/> 1 mm/h <input type="checkbox"/> 2 Other: _____ | <input type="checkbox"/> 1   | <input type="checkbox"/> 2      | <input type="checkbox"/> 3    |

|                                                                  |                       |                                                                          |                              |                                 |                               |
|------------------------------------------------------------------|-----------------------|--------------------------------------------------------------------------|------------------------------|---------------------------------|-------------------------------|
| <b>TNF-α</b> <input type="checkbox"/> 0 Unexamined, reason _____ |                       |                                                                          |                              |                                 |                               |
| Date: [ ] [ ] [ ] [ ]   YEAR   [ ] [ ]   MONTH   [ ] [ ]   DAY   |                       |                                                                          |                              |                                 | Normal range                  |
| Number: [ ] [ ] [ ] [ ] [ ] [ ]                                  |                       |                                                                          |                              |                                 |                               |
| <b>Item</b>                                                      | <b>Result</b>         |                                                                          | <b>Result Interpretation</b> |                                 |                               |
| TNF-α                                                            | <b>Measured Value</b> | <b>Unit</b>                                                              | <b>Normal</b>                | <b>Abnormal</b>                 |                               |
|                                                                  |                       |                                                                          |                              | <b>No Clinical significance</b> | <b>Clinically significant</b> |
|                                                                  |                       | <input type="checkbox"/> 1 pg/mL <input type="checkbox"/> 2 Other: _____ | <input type="checkbox"/> 1   | <input type="checkbox"/> 2      | <input type="checkbox"/> 3    |

|                                                                 |                       |                                                                          |                              |                                 |                               |
|-----------------------------------------------------------------|-----------------------|--------------------------------------------------------------------------|------------------------------|---------------------------------|-------------------------------|
| <b>IL-6</b> <input type="checkbox"/> 0 Unexamined, reason _____ |                       |                                                                          |                              |                                 |                               |
| Date: [ ] [ ] [ ] [ ]   YEAR   [ ] [ ]   MONTH   [ ] [ ]   DAY  |                       |                                                                          |                              |                                 | Normal range                  |
| Number: [ ] [ ] [ ] [ ] [ ] [ ]                                 |                       |                                                                          |                              |                                 |                               |
| <b>Item</b>                                                     | <b>Result</b>         |                                                                          | <b>Result Interpretation</b> |                                 |                               |
| IL-6                                                            | <b>Measured Value</b> | <b>Unit</b>                                                              | <b>Normal</b>                | <b>Abnormal</b>                 |                               |
|                                                                 |                       |                                                                          |                              | <b>No Clinical significance</b> | <b>Clinically significant</b> |
|                                                                 |                       | <input type="checkbox"/> 1 pg/mL <input type="checkbox"/> 2 Other: _____ | <input type="checkbox"/> 1   | <input type="checkbox"/> 2      | <input type="checkbox"/> 3    |

|                                                                                                                                        |                                                                                                                                                                                                                                                   |  |  |  |  |
|----------------------------------------------------------------------------------------------------------------------------------------|---------------------------------------------------------------------------------------------------------------------------------------------------------------------------------------------------------------------------------------------------|--|--|--|--|
| <b>Nucleic Acid Test of 2019-nCov</b> <input type="checkbox"/> 0 Unexamined, reason _____                                              |                                                                                                                                                                                                                                                   |  |  |  |  |
| Sampling Part (multiple choice): <input type="checkbox"/> 1 Upper respiratory tract <input type="checkbox"/> 2 Lower respiratory tract |                                                                                                                                                                                                                                                   |  |  |  |  |
| Upper respiratory tract                                                                                                                | Date: [ ] [ ] [ ] [ ]   YEAR   [ ] [ ]   MONTH   [ ] [ ]   DAY<br>Result: <input type="checkbox"/> 1 Negative <input type="checkbox"/> 2 Positive <input type="checkbox"/> 3 Unidentified <input type="checkbox"/> 4 Other, please describe _____ |  |  |  |  |
| Lower respiratory tract                                                                                                                | Date: [ ] [ ] [ ] [ ]   YEAR   [ ] [ ]   MONTH   [ ] [ ]   DAY<br>Result: <input type="checkbox"/> 1 Negative <input type="checkbox"/> 2 Positive <input type="checkbox"/> 3 Unidentified <input type="checkbox"/> 4 Other, please describe _____ |  |  |  |  |
| Result                                                                                                                                 | <input type="checkbox"/> 1 Negative <input type="checkbox"/> 2 Positive <input type="checkbox"/> 3 Unidentified <input type="checkbox"/> 4 Other, please describe _____                                                                           |  |  |  |  |

|                            |                  |
|----------------------------|------------------|
| Protocol Number: KY2020-29 | <b>Treatment</b> |
| Center Number [ ] [ ] [ ]  | Visit 5 (D14±1d) |

|                                                                                                                           |
|---------------------------------------------------------------------------------------------------------------------------|
| <b>Pulse oxygen saturation (without oxygen inhalation )</b> <input type="checkbox"/> <sub>0</sub> Unexamined, reason_____ |
| Date: [ ] [ ] [ ] [ ]  YEAR  [ ] [ ]  MONTH  [ ] [ ]  DAY                                                                 |
| Measured Value: _____ % (Rest state)                                                                                      |

| <b>Arterial blood gas analysis</b> <input type="checkbox"/> <sub>0</sub> Unexamined, reason_____                    |                |                                                                                               |                                       |                                       |                                       |                                       |
|---------------------------------------------------------------------------------------------------------------------|----------------|-----------------------------------------------------------------------------------------------|---------------------------------------|---------------------------------------|---------------------------------------|---------------------------------------|
| <input type="checkbox"/> <sub>1</sub> Not applicable                                                                |                |                                                                                               |                                       |                                       |                                       |                                       |
| Oxygen inhalation: <input type="checkbox"/> <sub>1</sub> No <input type="checkbox"/> <sub>2</sub> Yes, FiO2:_____ % |                |                                                                                               |                                       |                                       |                                       |                                       |
| Date: [ ] [ ] [ ] [ ]  YEAR  [ ] [ ]  MONTH  [ ] [ ]  DAY                                                           |                |                                                                                               |                                       |                                       |                                       |                                       |
| Normal range Number: [ ] [ ] [ ] [ ]                                                                                |                |                                                                                               |                                       |                                       |                                       |                                       |
| Item                                                                                                                | Result         |                                                                                               | Result Interpretation                 |                                       |                                       | Unexamined                            |
|                                                                                                                     | Measured Value | Unit                                                                                          | Normal                                | Abnormal                              |                                       |                                       |
|                                                                                                                     |                |                                                                                               |                                       | No Clinical significance              | Clinical significance                 |                                       |
| PaO2                                                                                                                |                | <input type="checkbox"/> <sub>1</sub> mmHg <input type="checkbox"/> <sub>2</sub> Other: _____ | <input type="checkbox"/> <sub>1</sub> | <input type="checkbox"/> <sub>2</sub> | <input type="checkbox"/> <sub>3</sub> | <input type="checkbox"/> <sub>0</sub> |
| SaO2                                                                                                                |                | <input type="checkbox"/> <sub>1</sub> % <input type="checkbox"/> <sub>2</sub> Other: _____    | <input type="checkbox"/> <sub>1</sub> | <input type="checkbox"/> <sub>2</sub> | <input type="checkbox"/> <sub>3</sub> | <input type="checkbox"/> <sub>0</sub> |

|                                                                                     |                                                                                                                                                                                                                                                                                                                                                                                                                                                                                                                                                                                                                                                                             |
|-------------------------------------------------------------------------------------|-----------------------------------------------------------------------------------------------------------------------------------------------------------------------------------------------------------------------------------------------------------------------------------------------------------------------------------------------------------------------------------------------------------------------------------------------------------------------------------------------------------------------------------------------------------------------------------------------------------------------------------------------------------------------------|
| <b>Clinical state</b> <input type="checkbox"/> <sub>0</sub> Unexamined, reason_____ |                                                                                                                                                                                                                                                                                                                                                                                                                                                                                                                                                                                                                                                                             |
| Date                                                                                | [ ] [ ] [ ] [ ]  YEAR  [ ] [ ]  MONTH  [ ] [ ]  DAY                                                                                                                                                                                                                                                                                                                                                                                                                                                                                                                                                                                                                         |
| Result                                                                              | <input type="checkbox"/> <sub>1</sub> Level 1: Discharge<br><input type="checkbox"/> <sub>2</sub> Level 2: Hospitalization, no requirement for oxygen therapy<br><input type="checkbox"/> <sub>3</sub> Level 3: Hospitalization, requiring oxygen therapy (non-NIV / HFNC)<br><input type="checkbox"/> <sub>4</sub> Level 4: ICU / Hospitalization, requiring non-invasive mechanical ventilation (NIV) / High Flow Nasal Catheter Oxygen Therapy (HFNC)<br><input type="checkbox"/> <sub>5</sub> Level 5: ICU, requiring extracorporeal membrane oxygenation (ECMO) and / or invasive mechanical ventilation (IMV)<br><input type="checkbox"/> <sub>6</sub> Level 6: Death |

**If any adverse events have occurred since the last visit, please fill in the “adverse events” form. If there is medication combination, please fill in the “previous/combined medication” form; If there is combined non-drug therapy, please fill in the “combined non-drug therapy” form; If there is an out-of-plan inspection, please fill in the “out-of-plan inspection” form; If there is IMV/NIV、ECMO、HFNC、oxygen therapy, please fill in the “IMV/NIV、ECMO、HFNC、oxygen therapy” form.**

|                            |                                 |
|----------------------------|---------------------------------|
| Protocol Number: KY2020-29 | <b>Treatment</b>                |
| Center Number  __          | Subject Screening Number  _____ |
| Visit 6 (D21±1d)           |                                 |

|                                                                        |                                                           |                    |                                                                                                                                                                                                                                |
|------------------------------------------------------------------------|-----------------------------------------------------------|--------------------|--------------------------------------------------------------------------------------------------------------------------------------------------------------------------------------------------------------------------------|
| <b>Date of Current Visit:</b>  __ _ _ _ YEAR __ _ MONTH __ _ DAY       |                                                           |                    |                                                                                                                                                                                                                                |
| <b>Vital Signs</b> <input type="checkbox"/> 0 Unexamined, reason _____ |                                                           |                    |                                                                                                                                                                                                                                |
| Date                                                                   | __ _ _ _ YEAR __ _ MONTH __ _ DAY                         |                    |                                                                                                                                                                                                                                |
| Daily maximum temperature                                              | __ _ _ . __ _ °C                                          | Measurement method | <input type="checkbox"/> 1 Axilla <input type="checkbox"/> 2 Oral <input type="checkbox"/> 3 Anus<br><input type="checkbox"/> 4 Ear <input type="checkbox"/> 5 Unknown <input type="checkbox"/> 6 Other, please describe _____ |
| Respiratory                                                            | __ _ _ times/min                                          | Pulse              | __ _ _ times/min                                                                                                                                                                                                               |
| Blood pressure                                                         | __ _ _ / __ _ _  mmHg (Systolic/diastolic blood pressure) |                    |                                                                                                                                                                                                                                |

|                                                                                  |                                                                                                                |                            |                            |                            |                              |
|----------------------------------------------------------------------------------|----------------------------------------------------------------------------------------------------------------|----------------------------|----------------------------|----------------------------|------------------------------|
| <b>Physical examination</b> <input type="checkbox"/> 0 Unexamined, reason: _____ |                                                                                                                |                            |                            |                            |                              |
| Date                                                                             | _____ YEAR __ _ MONTH __ _ DAY                                                                                 |                            |                            |                            |                              |
| Inspection Part                                                                  | Result                                                                                                         |                            |                            |                            | If abnormal, please describe |
|                                                                                  | 1= Normal<br>2= Abnormal, No Clinical significance<br>3= Abnormal, with Clinically significant<br>0=Unexamined |                            |                            |                            |                              |
| General appearance                                                               | <input type="checkbox"/> 1                                                                                     | <input type="checkbox"/> 2 | <input type="checkbox"/> 3 | <input type="checkbox"/> 0 |                              |
| Head                                                                             | <input type="checkbox"/> 1                                                                                     | <input type="checkbox"/> 2 | <input type="checkbox"/> 3 | <input type="checkbox"/> 0 |                              |
| Eyes                                                                             | <input type="checkbox"/> 1                                                                                     | <input type="checkbox"/> 2 | <input type="checkbox"/> 3 | <input type="checkbox"/> 0 |                              |
| Nose                                                                             | <input type="checkbox"/> 1                                                                                     | <input type="checkbox"/> 2 | <input type="checkbox"/> 3 | <input type="checkbox"/> 0 |                              |
| Larynx                                                                           | <input type="checkbox"/> 1                                                                                     | <input type="checkbox"/> 2 | <input type="checkbox"/> 3 | <input type="checkbox"/> 0 |                              |
| Neck and thyroid                                                                 | <input type="checkbox"/> 1                                                                                     | <input type="checkbox"/> 2 | <input type="checkbox"/> 3 | <input type="checkbox"/> 0 |                              |
| Skin                                                                             | <input type="checkbox"/> 1                                                                                     | <input type="checkbox"/> 2 | <input type="checkbox"/> 3 | <input type="checkbox"/> 0 |                              |
| Cardiovascular system                                                            | <input type="checkbox"/> 1                                                                                     | <input type="checkbox"/> 2 | <input type="checkbox"/> 3 | <input type="checkbox"/> 0 |                              |

|                            |                                                  |
|----------------------------|--------------------------------------------------|
| Protocol Number: KY2020-29 | <b>Treatment</b>                                 |
| Center Number [ ] [ ]      | Subject Screening Number [ ] [ ] [ ] [ ] [ ] [ ] |
| Visit 6 (D21±1d)           |                                                  |

|                        |                            |                            |                            |                            |  |
|------------------------|----------------------------|----------------------------|----------------------------|----------------------------|--|
| Chest and lungs        | <input type="checkbox"/> 1 | <input type="checkbox"/> 2 | <input type="checkbox"/> 3 | <input type="checkbox"/> 0 |  |
| Abdomen                | <input type="checkbox"/> 1 | <input type="checkbox"/> 2 | <input type="checkbox"/> 3 | <input type="checkbox"/> 0 |  |
| Nervous system         | <input type="checkbox"/> 1 | <input type="checkbox"/> 2 | <input type="checkbox"/> 3 | <input type="checkbox"/> 0 |  |
| Musculoskeletal system | <input type="checkbox"/> 1 | <input type="checkbox"/> 2 | <input type="checkbox"/> 3 | <input type="checkbox"/> 0 |  |
| Lymphatic system       | <input type="checkbox"/> 1 | <input type="checkbox"/> 2 | <input type="checkbox"/> 3 | <input type="checkbox"/> 0 |  |

|                                                                                                                                                                     |
|---------------------------------------------------------------------------------------------------------------------------------------------------------------------|
| <b>Respiratory symptoms</b> <input type="checkbox"/> 0 Unexamined, reason _____                                                                                     |
| Date: [ ] [ ] [ ] [ ]  YEAR  [ ] [ ]  MONTH  [ ] [ ]  DAY                                                                                                           |
| Whether the subject has respiratory symptoms or not: <input type="checkbox"/> 0 NO <input type="checkbox"/> 1 YES, please describe: _____                           |
| Result: <input type="checkbox"/> 1 Normal <input type="checkbox"/> 2 Abnormal, No Clinical significance <input type="checkbox"/> 3 Abnormal, Clinically significant |

| <b>Blood Count</b> <input type="checkbox"/> 0 Unexamined, reason _____                              |                                                                                        |      |                            |                            |                            |                            |
|-----------------------------------------------------------------------------------------------------|----------------------------------------------------------------------------------------|------|----------------------------|----------------------------|----------------------------|----------------------------|
| Date: [ ] [ ] [ ] [ ]  YEAR  [ ] [ ]  MONTH  [ ] [ ]  DAY      Normal range Number: [ ] [ ] [ ] [ ] |                                                                                        |      |                            |                            |                            |                            |
| Item                                                                                                | Result                                                                                 |      | Result Interpretation      |                            |                            | Unexamined                 |
|                                                                                                     | Measured Value                                                                         | Unit | Normal                     | No Clinical significance   | Clinically significant     |                            |
| Red Blood Cell (RBC)                                                                                | <input type="checkbox"/> 1 10 <sup>12</sup> /L <input type="checkbox"/> 2 Other: _____ |      | <input type="checkbox"/> 1 | <input type="checkbox"/> 2 | <input type="checkbox"/> 3 | <input type="checkbox"/> 0 |
| White Blood Cell                                                                                    | <input type="checkbox"/> 1 10 <sup>9</sup> /L <input type="checkbox"/> 2 Other: _____  |      | <input type="checkbox"/> 1 | <input type="checkbox"/> 2 | <input type="checkbox"/> 3 | <input type="checkbox"/> 0 |
| Hemoglobin (Hb)                                                                                     | <input type="checkbox"/> 1 g/L <input type="checkbox"/> 2 Other: _____                 |      | <input type="checkbox"/> 1 | <input type="checkbox"/> 2 | <input type="checkbox"/> 3 | <input type="checkbox"/> 0 |
| Platelet (PLT)                                                                                      | <input type="checkbox"/> 1 10 <sup>9</sup> /L <input type="checkbox"/> 2 Other: _____  |      | <input type="checkbox"/> 1 | <input type="checkbox"/> 2 | <input type="checkbox"/> 3 | <input type="checkbox"/> 0 |
| Neutrophil (ANC)                                                                                    | <input type="checkbox"/> 1 10 <sup>9</sup> /L <input type="checkbox"/> 2 Other: _____  |      | <input type="checkbox"/> 1 | <input type="checkbox"/> 2 | <input type="checkbox"/> 3 | <input type="checkbox"/> 0 |
| Lymphocyte (LY)                                                                                     | <input type="checkbox"/> 1 10 <sup>9</sup> /L <input type="checkbox"/> 2 Other: _____  |      | <input type="checkbox"/> 1 | <input type="checkbox"/> 2 | <input type="checkbox"/> 3 | <input type="checkbox"/> 0 |
| Monocyte (MO)                                                                                       | <input type="checkbox"/> 1 10 <sup>9</sup> /L <input type="checkbox"/> 2 Other: _____  |      | <input type="checkbox"/> 1 | <input type="checkbox"/> 2 | <input type="checkbox"/> 3 | <input type="checkbox"/> 0 |
| Eosinophil (EO)                                                                                     | <input type="checkbox"/> 1 10 <sup>9</sup> /L <input type="checkbox"/> 2 Other: _____  |      | <input type="checkbox"/> 1 | <input type="checkbox"/> 2 | <input type="checkbox"/> 3 | <input type="checkbox"/> 0 |
| Basophil (BA)                                                                                       | <input type="checkbox"/> 1 10 <sup>9</sup> /L <input type="checkbox"/> 2 Other: _____  |      | <input type="checkbox"/> 1 | <input type="checkbox"/> 2 | <input type="checkbox"/> 3 | <input type="checkbox"/> 0 |

| <b>Blood Biochemistry</b> <input type="checkbox"/> 0 Unexamined, reason _____                       |        |                       |            |
|-----------------------------------------------------------------------------------------------------|--------|-----------------------|------------|
| Date: [ ] [ ] [ ] [ ]  YEAR  [ ] [ ]  MONTH  [ ] [ ]  DAY      Normal range Number: [ ] [ ] [ ] [ ] |        |                       |            |
| Item                                                                                                | Result | Result Interpretation | Unexamined |

|                            |                                                  |                  |                  |
|----------------------------|--------------------------------------------------|------------------|------------------|
| Protocol Number: KY2020-29 |                                                  | <b>Treatment</b> |                  |
| Center Number [ ] [ ] [ ]  | Subject Screening Number [ ] [ ] [ ] [ ] [ ] [ ] |                  | Visit 6 (D21±1d) |

|                                        | Measured Value | Unit                                                                                            | Normal                                | Abnormal                              |                                       | Unexamined                            |
|----------------------------------------|----------------|-------------------------------------------------------------------------------------------------|---------------------------------------|---------------------------------------|---------------------------------------|---------------------------------------|
|                                        |                |                                                                                                 |                                       | No Clinical significance              | Clinically significant                |                                       |
| Glutamic-pyruvic transaminase (ALT)    |                | <input type="checkbox"/> <sub>1</sub> U/L <input type="checkbox"/> <sub>2</sub> Other: _____    | <input type="checkbox"/> <sub>1</sub> | <input type="checkbox"/> <sub>2</sub> | <input type="checkbox"/> <sub>3</sub> | <input type="checkbox"/> <sub>0</sub> |
| Glutamic-oxalacetic transaminase (AST) |                | <input type="checkbox"/> <sub>1</sub> U/L <input type="checkbox"/> <sub>2</sub> Other: _____    | <input type="checkbox"/> <sub>1</sub> | <input type="checkbox"/> <sub>2</sub> | <input type="checkbox"/> <sub>3</sub> | <input type="checkbox"/> <sub>0</sub> |
| Total Bilirubin (TBIL)                 |                | <input type="checkbox"/> <sub>1</sub> µmol/L <input type="checkbox"/> <sub>2</sub> Other: _____ | <input type="checkbox"/> <sub>1</sub> | <input type="checkbox"/> <sub>2</sub> | <input type="checkbox"/> <sub>3</sub> | <input type="checkbox"/> <sub>0</sub> |
| Albumin (ALB)                          |                | <input type="checkbox"/> <sub>1</sub> g/L <input type="checkbox"/> <sub>2</sub> Other: _____    | <input type="checkbox"/> <sub>1</sub> | <input type="checkbox"/> <sub>2</sub> | <input type="checkbox"/> <sub>3</sub> | <input type="checkbox"/> <sub>0</sub> |
| γ- glutamyl transpeptidase (GGT)       |                | <input type="checkbox"/> <sub>1</sub> U/L <input type="checkbox"/> <sub>2</sub> Other: _____    | <input type="checkbox"/> <sub>1</sub> | <input type="checkbox"/> <sub>2</sub> | <input type="checkbox"/> <sub>3</sub> | <input type="checkbox"/> <sub>0</sub> |
| Lactic dehydrogenase (LDH)             |                | <input type="checkbox"/> <sub>1</sub> U/L <input type="checkbox"/> <sub>2</sub> Other: _____    | <input type="checkbox"/> <sub>1</sub> | <input type="checkbox"/> <sub>2</sub> | <input type="checkbox"/> <sub>3</sub> | <input type="checkbox"/> <sub>0</sub> |
| Creatine kinase (CK)                   |                | <input type="checkbox"/> <sub>1</sub> U/L <input type="checkbox"/> <sub>2</sub> Other: _____    | <input type="checkbox"/> <sub>1</sub> | <input type="checkbox"/> <sub>2</sub> | <input type="checkbox"/> <sub>3</sub> | <input type="checkbox"/> <sub>0</sub> |
| Creatine kinase isoenzyme (CK-MB)      |                | <input type="checkbox"/> <sub>1</sub> U/L <input type="checkbox"/> <sub>2</sub> Other: _____    | <input type="checkbox"/> <sub>1</sub> | <input type="checkbox"/> <sub>2</sub> | <input type="checkbox"/> <sub>3</sub> | <input type="checkbox"/> <sub>0</sub> |
| Blood urea nitrogen (BUN)              |                | <input type="checkbox"/> <sub>1</sub> mmol/L <input type="checkbox"/> <sub>2</sub> Other: _____ | <input type="checkbox"/> <sub>1</sub> | <input type="checkbox"/> <sub>2</sub> | <input type="checkbox"/> <sub>3</sub> | <input type="checkbox"/> <sub>0</sub> |
| Urea (Urea)                            |                | <input type="checkbox"/> <sub>1</sub> mmol/L <input type="checkbox"/> <sub>2</sub> Other: _____ | <input type="checkbox"/> <sub>1</sub> | <input type="checkbox"/> <sub>2</sub> | <input type="checkbox"/> <sub>3</sub> | <input type="checkbox"/> <sub>0</sub> |
| Serum creatinine (CR)                  |                | <input type="checkbox"/> <sub>1</sub> µmol/L <input type="checkbox"/> <sub>2</sub> Other: _____ | <input type="checkbox"/> <sub>1</sub> | <input type="checkbox"/> <sub>2</sub> | <input type="checkbox"/> <sub>3</sub> | <input type="checkbox"/> <sub>0</sub> |

| <b>Urine Test</b> <input type="checkbox"/> <sub>0</sub> Unexamined, reason_____ |                |                                                                                                         |                                       |                                       |                                       |                                       |
|---------------------------------------------------------------------------------|----------------|---------------------------------------------------------------------------------------------------------|---------------------------------------|---------------------------------------|---------------------------------------|---------------------------------------|
| Date: [ ] [ ] [ ] [ ]  YEAR  [ ] [ ]  MONTH  [ ] [ ]  DAY                       |                |                                                                                                         |                                       | Normal range Number: [ ] [ ] [ ] [ ]  |                                       |                                       |
| Item                                                                            | Result         |                                                                                                         | Normal                                | Result Interpretation                 |                                       | Unexamined                            |
|                                                                                 | Measured Value | Unit                                                                                                    |                                       | Abnormal                              |                                       |                                       |
|                                                                                 |                |                                                                                                         |                                       | No Clinical significance              | Clinically significant                |                                       |
| Urine Protein                                                                   |                | <input type="checkbox"/> <sub>1</sub> Not Applicable <input type="checkbox"/> <sub>2</sub> Other: _____ | <input type="checkbox"/> <sub>1</sub> | <input type="checkbox"/> <sub>2</sub> | <input type="checkbox"/> <sub>3</sub> | <input type="checkbox"/> <sub>0</sub> |
| Urine Glucose                                                                   |                | <input type="checkbox"/> <sub>1</sub> mmol/L <input type="checkbox"/> <sub>2</sub> Other: _____         | <input type="checkbox"/> <sub>1</sub> | <input type="checkbox"/> <sub>2</sub> | <input type="checkbox"/> <sub>3</sub> | <input type="checkbox"/> <sub>0</sub> |
| Urine PH value                                                                  |                | <input type="checkbox"/> <sub>1</sub> Not Applicable <input type="checkbox"/> <sub>2</sub> Other: _____ | <input type="checkbox"/> <sub>1</sub> | <input type="checkbox"/> <sub>2</sub> | <input type="checkbox"/> <sub>3</sub> | <input type="checkbox"/> <sub>0</sub> |
| Urine Erythrocyte                                                               |                | <input type="checkbox"/> <sub>1</sub> Not Applicable <input type="checkbox"/> <sub>2</sub> Other: _____ | <input type="checkbox"/> <sub>1</sub> | <input type="checkbox"/> <sub>2</sub> | <input type="checkbox"/> <sub>3</sub> | <input type="checkbox"/> <sub>0</sub> |
| Urine Leukocyte                                                                 |                | <input type="checkbox"/> <sub>1</sub> Not Applicable <input type="checkbox"/> <sub>2</sub> Other: _____ | <input type="checkbox"/> <sub>1</sub> | <input type="checkbox"/> <sub>2</sub> | <input type="checkbox"/> <sub>3</sub> | <input type="checkbox"/> <sub>0</sub> |
| Urine Ketone                                                                    |                | <input type="checkbox"/> <sub>1</sub> Not Applicable <input type="checkbox"/> <sub>2</sub> Other: _____ | <input type="checkbox"/> <sub>1</sub> | <input type="checkbox"/> <sub>2</sub> | <input type="checkbox"/> <sub>3</sub> | <input type="checkbox"/> <sub>0</sub> |

|                                                                                           |
|-------------------------------------------------------------------------------------------|
| <b>Coagulation Function</b> <input type="checkbox"/> <sub>0</sub> Unexamined, reason_____ |
|-------------------------------------------------------------------------------------------|

|                                    |                                                                |
|------------------------------------|----------------------------------------------------------------|
| Protocol Number: KY2020-29         | <b>Treatment</b>                                               |
| Center Number <input type="text"/> | Subject Screening Number <input type="text"/> Visit 6 (D21±1d) |

Date: |||YEAR|||MONTH|||DAY      Normal range Number: ||||

| Item                                         | Result                                   |                                        | Result Interpretation      |                            |                            | Unexamined                 |
|----------------------------------------------|------------------------------------------|----------------------------------------|----------------------------|----------------------------|----------------------------|----------------------------|
|                                              | Measured Value                           | Unit                                   | Normal                     | Abnormal                   |                            |                            |
|                                              |                                          |                                        |                            | No Clinical significance   | Clinically significant     |                            |
| ProthrombinTime (PT)                         | <input type="checkbox"/> 1 S             | <input type="checkbox"/> 2Other: _____ | <input type="checkbox"/> 1 | <input type="checkbox"/> 2 | <input type="checkbox"/> 3 | <input type="checkbox"/> 0 |
| Activated Partial Thromboplastin Time (APTT) | <input type="checkbox"/> 1 S             | <input type="checkbox"/> 2Other: _____ | <input type="checkbox"/> 1 | <input type="checkbox"/> 2 | <input type="checkbox"/> 3 | <input type="checkbox"/> 0 |
| Thrombin Time (TT)                           | <input type="checkbox"/> 1 S             | <input type="checkbox"/> 2Other: _____ | <input type="checkbox"/> 1 | <input type="checkbox"/> 2 | <input type="checkbox"/> 3 | <input type="checkbox"/> 0 |
| Fibrinogen (Fbg)                             | <input type="checkbox"/> 1 g/L           | <input type="checkbox"/> 2Other: _____ | <input type="checkbox"/> 1 | <input type="checkbox"/> 2 | <input type="checkbox"/> 3 | <input type="checkbox"/> 0 |
| International Normalized Ratio (INR)         | <input type="checkbox"/> 1Not Applicable | <input type="checkbox"/> 2Other: _____ | <input type="checkbox"/> 1 | <input type="checkbox"/> 2 | <input type="checkbox"/> 3 | <input type="checkbox"/> 0 |

**C-REACTIVE PROTEIN (CRP)**    0Unexamined, reason \_\_\_\_\_

Date: |||YEAR|||MONTH|||DAY      Normal range Number: ||||

| Item                     | Result                          |                                        | Result Interpretation      |                            |                            |
|--------------------------|---------------------------------|----------------------------------------|----------------------------|----------------------------|----------------------------|
|                          | Measured Value                  | Unit                                   | Normal                     | Abnormal                   |                            |
|                          |                                 |                                        |                            | No Clinical significance   | Clinically significant     |
| C-REACTIVE PROTEIN (CRP) | <input type="checkbox"/> 1 mg/L | <input type="checkbox"/> 2Other: _____ | <input type="checkbox"/> 1 | <input type="checkbox"/> 2 | <input type="checkbox"/> 3 |

**Erythrocyte Sedimentation Rate (ESR)**    0Unexamined, reason \_\_\_\_\_

Date: |||YEAR|||MONTH|||DAY      Normal range Number: ||||

| Item                                 | Result                          |                                        | Result Interpretation      |                            |                            |
|--------------------------------------|---------------------------------|----------------------------------------|----------------------------|----------------------------|----------------------------|
|                                      | Measured Value                  | Unit                                   | Normal                     | Abnormal                   |                            |
|                                      |                                 |                                        |                            | No Clinical significance   | Clinically significant     |
| Erythrocyte Sedimentation Rate (ESR) | <input type="checkbox"/> 1 mm/h | <input type="checkbox"/> 2Other: _____ | <input type="checkbox"/> 1 | <input type="checkbox"/> 2 | <input type="checkbox"/> 3 |

**TNF-α**    0Unexamined, reason \_\_\_\_\_

Date: |||YEAR|||MONTH|||DAY      Normal range Number: ||||

| Item  | Result                           |                                        | Result Interpretation      |                            |                            |
|-------|----------------------------------|----------------------------------------|----------------------------|----------------------------|----------------------------|
|       | Measured Value                   | Unit                                   | Normal                     | Abnormal                   |                            |
|       |                                  |                                        |                            | No Clinical significance   | Clinically significant     |
| TNF-α | <input type="checkbox"/> 1 pg/mL | <input type="checkbox"/> 2Other: _____ | <input type="checkbox"/> 1 | <input type="checkbox"/> 2 | <input type="checkbox"/> 3 |

**IL-6**    0Unexamined, reason \_\_\_\_\_

|                            |                  |
|----------------------------|------------------|
| Protocol Number: KY2020-29 | <b>Treatment</b> |
| Center Number [ ] [ ] [ ]  | Visit 6 (D21±1d) |

Date: [ ] [ ] [ ] [ ] |YEAR| [ ] [ ] |MONTH| [ ] [ ] |DAY      Normal range Number: [ ] [ ] [ ] [ ]

| Item                     | Result         |                                                                          | Result Interpretation      |                            |                            |
|--------------------------|----------------|--------------------------------------------------------------------------|----------------------------|----------------------------|----------------------------|
|                          | Measured Value | Unit                                                                     | Normal                     | Abnormal                   |                            |
| No Clinical significance |                |                                                                          |                            | Clinically significant     |                            |
| IL-6                     |                | <input type="checkbox"/> 1 pg/mL <input type="checkbox"/> 2 Other: _____ | <input type="checkbox"/> 1 | <input type="checkbox"/> 2 | <input type="checkbox"/> 3 |

**Urine or serum HCG (Only applicable to women of childbearing age)**    0 Unexamined, reason \_\_\_\_\_

1 Not Applicable (Man or woman who isn't able to reproduce)

Date: [ ] [ ] [ ] [ ] |YEAR| [ ] [ ] |MONTH| [ ] [ ] |DAY

Sample: 1 Blood    2 Urine

Result: 1 Negative    2 Positive

**Routine 12 Leads Electrocardiogram**    0 Unexamined, reason \_\_\_\_\_

Date: [ ] [ ] [ ] [ ] |YEAR| [ ] [ ] |MONTH| [ ] [ ] |DAY

Result: 1 Normal    2 Abnormal, No Clinical significance    3 Abnormal Clinically significant

If "Abnormal", please describe: \_\_\_\_\_

**Chest CT**    0 Unexamined, reason \_\_\_\_\_

Date: [ ] [ ] [ ] [ ] |YEAR| [ ] [ ] |MONTH| [ ] [ ] |DAY

Result: 1 Normal    2 Abnormal, No Clinical significance    3 Abnormal, Clinically significant

If abnormal, please describe \_\_\_\_\_

Whether chest CT lesion absorbed  $\geq 50\%$  than baseline??

0 NO    1 YES    2 Unidentified    3 Unknown

4 Other, please describe: \_\_\_\_\_

**Nucleic Acid Test of 2019-nCov**    0 Unexamined, reason \_\_\_\_\_

Sampling Part (multiple choice): 1 Upper respiratory tract    2 Lower respiratory tract

|                         |                                                                                                                                                                                                                                              |
|-------------------------|----------------------------------------------------------------------------------------------------------------------------------------------------------------------------------------------------------------------------------------------|
| Upper respiratory tract | Date: [ ] [ ] [ ] [ ]  YEAR  [ ] [ ]  MONTH  [ ] [ ]  DAY<br>Result: <input type="checkbox"/> 1 Negative <input type="checkbox"/> 2 Positive <input type="checkbox"/> 3 Unidentified <input type="checkbox"/> 4 Other, please describe _____ |
|-------------------------|----------------------------------------------------------------------------------------------------------------------------------------------------------------------------------------------------------------------------------------------|

|                            |                  |
|----------------------------|------------------|
| Protocol Number: KY2020-29 | <b>Treatment</b> |
| Center Number [ ] [ ] [ ]  | Visit 6 (D21±1d) |

|                         |                                                                                                                                                                                                                                              |
|-------------------------|----------------------------------------------------------------------------------------------------------------------------------------------------------------------------------------------------------------------------------------------|
| Lower respiratory tract | Date: [ ] [ ] [ ] [ ]  YEAR  [ ] [ ]  MONTH  [ ] [ ]  DAY<br>Result: <input type="checkbox"/> 1 Negative <input type="checkbox"/> 2 Positive <input type="checkbox"/> 3 Unidentified <input type="checkbox"/> 4 Other, please describe _____ |
| Result                  | <input type="checkbox"/> 1 Negative <input type="checkbox"/> 2 Positive <input type="checkbox"/> 3 Unidentified <input type="checkbox"/> 4 Other, please describe _____                                                                      |

|                                                                                                                 |
|-----------------------------------------------------------------------------------------------------------------|
| <b>Pulse oxygen saturation (without oxygen inhalation )</b> <input type="checkbox"/> 0 Unexamined, reason _____ |
| Date: [ ] [ ] [ ] [ ]  YEAR  [ ] [ ]  MONTH  [ ] [ ]  DAY                                                       |
| Measured Value: _____ % (Rest state)                                                                            |

| <b>Arterial blood gas analysis</b> <input type="checkbox"/> 0 Unexamined, reason _____<br><input type="checkbox"/> 1 Not applicable |                |                                                                         |                            |                            |                            |                            |
|-------------------------------------------------------------------------------------------------------------------------------------|----------------|-------------------------------------------------------------------------|----------------------------|----------------------------|----------------------------|----------------------------|
| Oxygen inhalation: <input type="checkbox"/> 1 No <input type="checkbox"/> 2 Yes, FIO2: _____ %                                      |                |                                                                         |                            |                            |                            |                            |
| Date: [ ] [ ] [ ] [ ]  YEAR  [ ] [ ]  MONTH  [ ] [ ]  DAY                                                                           |                |                                                                         |                            |                            |                            |                            |
| Normal range Number: [ ] [ ] [ ] [ ]                                                                                                |                |                                                                         |                            |                            |                            |                            |
| Item                                                                                                                                | Result         |                                                                         | Result Interpretation      |                            |                            | Unexamined                 |
|                                                                                                                                     | Measured Value | Unit                                                                    | Normal                     | Abnormal                   |                            |                            |
|                                                                                                                                     |                |                                                                         |                            |                            |                            | No Clinical significance   |
| PaO2                                                                                                                                |                | <input type="checkbox"/> 1 mmHg <input type="checkbox"/> 2 Other: _____ | <input type="checkbox"/> 1 | <input type="checkbox"/> 2 | <input type="checkbox"/> 3 | <input type="checkbox"/> 0 |
| SaO2                                                                                                                                |                | <input type="checkbox"/> 1 % <input type="checkbox"/> 2 Other: _____    | <input type="checkbox"/> 1 | <input type="checkbox"/> 2 | <input type="checkbox"/> 3 | <input type="checkbox"/> 0 |

|                                                                           |                                                                                                                                                                                                                                                                                                                                                                                                                                                                                                                                                                                                           |
|---------------------------------------------------------------------------|-----------------------------------------------------------------------------------------------------------------------------------------------------------------------------------------------------------------------------------------------------------------------------------------------------------------------------------------------------------------------------------------------------------------------------------------------------------------------------------------------------------------------------------------------------------------------------------------------------------|
| <b>Clinical state</b> <input type="checkbox"/> 0 Unexamined, reason _____ |                                                                                                                                                                                                                                                                                                                                                                                                                                                                                                                                                                                                           |
| Date                                                                      | [ ] [ ] [ ] [ ]  YEAR  [ ] [ ]  MONTH  [ ] [ ]  DAY                                                                                                                                                                                                                                                                                                                                                                                                                                                                                                                                                       |
| Result                                                                    | <input type="checkbox"/> 1 Level 1: Discharge<br><input type="checkbox"/> 2 Level 2: Hospitalization, no requirement for oxygen therapy<br><input type="checkbox"/> 3 Level 3: Hospitalization, requiring oxygen therapy (non-NIV / HFNC)<br><input type="checkbox"/> 4 Level 4: ICU / Hospitalization, requiring non-invasive mechanical ventilation (NIV) / High Flow Nasal Catheter Oxygen Therapy (HFNC)<br><input type="checkbox"/> 5 Level 5: ICU, requiring extracorporeal membrane oxygenation (ECMO) and / or invasive mechanical ventilation (IMV)<br><input type="checkbox"/> 6 Level 6: Death |

**If any adverse events have occurred since the last visit, please fill in the “adverse events” form. If there is medication combination, please fill in the “previous/combined medication” form; If there is combined non-drug therapy, please fill in the “combined non-drug therapy” form; If there is an out-of-plan inspection, please fill in the “out-of-plan inspection” form; If there is IMV/NIV、ECMO、HFNC、oxygen therapy, please fill in the “IMV/NIV、ECMO、HFNC、oxygen therapy” form.**



|                                                                          |                         |
|--------------------------------------------------------------------------|-------------------------|
| Protocol Number: KY2020-29                                               | <b>End of Treatment</b> |
| Center Number [ ][ ]      Subject Screening Number [ ][ ][ ][ ][ ][ ][ ] |                         |

|                                                                                                                                                                                                                                                                                                                                                                                                                                                                                                                                                                                                                                                                                                                                                                                                                        |
|------------------------------------------------------------------------------------------------------------------------------------------------------------------------------------------------------------------------------------------------------------------------------------------------------------------------------------------------------------------------------------------------------------------------------------------------------------------------------------------------------------------------------------------------------------------------------------------------------------------------------------------------------------------------------------------------------------------------------------------------------------------------------------------------------------------------|
| <b>End of the Treatment</b>                                                                                                                                                                                                                                                                                                                                                                                                                                                                                                                                                                                                                                                                                                                                                                                            |
| Whether the subject finished all the treatment according to the protocol? <input type="checkbox"/> _0 NO <input type="checkbox"/> _1 YES                                                                                                                                                                                                                                                                                                                                                                                                                                                                                                                                                                                                                                                                               |
| End Date: [ ][ ][ ][ ][ ]YEAR[ ][ ][ ]MONTH[ ][ ][ ]DAY                                                                                                                                                                                                                                                                                                                                                                                                                                                                                                                                                                                                                                                                                                                                                                |
| <p>If the patient exit ahead of schedule, please choose the most important reason (One-Choice) :</p> <p><input type="checkbox"/>_1 Disease progression occurred during the study and changes in treatment were required after comprehensive assessment by the investigators.</p> <p><input type="checkbox"/>_2 Adverse events lead to an exacerbation of the disease</p> <p><input type="checkbox"/>_3 The subject is reluctant to continue using the study drug.</p> <p><input type="checkbox"/>_4 Pregnancy</p> <p><input type="checkbox"/>_5 Loss to follow-up</p> <p><input type="checkbox"/>_6 Death</p> <p><input type="checkbox"/>_7 Subject withdraws the Informed Consent</p> <p><input type="checkbox"/>_8 Study suspension</p> <p><input type="checkbox"/>_9 Other, please describe: _____</p> <p>_____</p> |
| <p>Notes (Please record other matter which needs additional clarification) :</p> <p>_____</p> <p>_____</p> <p>_____</p>                                                                                                                                                                                                                                                                                                                                                                                                                                                                                                                                                                                                                                                                                                |

|                            |                                                                  |
|----------------------------|------------------------------------------------------------------|
| Protocol Number: KY2020-29 | <b>Extend Follow-Up</b>                                          |
| Center Number [ ] [ ]      | Subject Screening Number [ ] [ ] [ ] [ ] [ ] [ ] [ ] [ ] [ ] [ ] |
| Visit 7 (D28±2d)           |                                                                  |

**Type of visit**      <sub>1</sub> Telephone follow-up    <sub>2</sub> Hospital follow-up

**Date of Current Visit:** [ ] [ ] [ ] [ ] |YEAR| [ ] [ ] |MONTH| [ ] [ ] |DAY

If the subject has been discharged from the hospital, the following contents may not be carried out, please leave blank; If the subject is not discharged, please conduct the following examinations.

**Vital Signs**      <sub>0</sub> Unexamined, reason \_\_\_\_\_

|                           |                                                                            |                    |                                                                                                                                                                                                                                                                                                   |
|---------------------------|----------------------------------------------------------------------------|--------------------|---------------------------------------------------------------------------------------------------------------------------------------------------------------------------------------------------------------------------------------------------------------------------------------------------|
| Date                      | [ ] [ ] [ ] [ ]  YEAR  [ ] [ ]  MONTH  [ ] [ ]  DAY                        |                    |                                                                                                                                                                                                                                                                                                   |
| Daily maximum temperature | [ ] [ ] [ ] . [ ] [ ] °C                                                   | Measurement method | <input type="checkbox"/> <sub>1</sub> Axilla <input type="checkbox"/> <sub>2</sub> Oral <input type="checkbox"/> <sub>3</sub> Anus<br><input type="checkbox"/> <sub>4</sub> Ear <input type="checkbox"/> <sub>5</sub> Unknown <input type="checkbox"/> <sub>6</sub> Other , please describe _____ |
| Respiratory               | [ ] [ ] [ ]  times/min                                                     | Pulse              | [ ] [ ] [ ]  times/min                                                                                                                                                                                                                                                                            |
| Blood pressure            | [ ] [ ] [ ] [ ] / [ ] [ ] [ ] [ ] mmHg (Systolic/diastolic blood pressure) |                    |                                                                                                                                                                                                                                                                                                   |

**Physical examination**      <sub>0</sub> Unexamined, reason: \_\_\_\_\_

|                    |                                                                                                                |                                       |                                       |                                       |                              |
|--------------------|----------------------------------------------------------------------------------------------------------------|---------------------------------------|---------------------------------------|---------------------------------------|------------------------------|
| Date               | [ ] [ ] [ ] [ ]  YEAR  [ ] [ ]  MONTH  [ ] [ ]  DAY                                                            |                                       |                                       |                                       |                              |
| Inspection Part    | Result                                                                                                         |                                       |                                       |                                       | If abnormal, please describe |
|                    | 1= Normal<br>2= Abnormal, No Clinical significance<br>3= Abnormal, with Clinically significant<br>0=Unexamined |                                       |                                       |                                       |                              |
| General appearance | <input type="checkbox"/> <sub>1</sub>                                                                          | <input type="checkbox"/> <sub>2</sub> | <input type="checkbox"/> <sub>3</sub> | <input type="checkbox"/> <sub>0</sub> |                              |
| Head               | <input type="checkbox"/> <sub>1</sub>                                                                          | <input type="checkbox"/> <sub>2</sub> | <input type="checkbox"/> <sub>3</sub> | <input type="checkbox"/> <sub>0</sub> |                              |
| Eyes               | <input type="checkbox"/> <sub>1</sub>                                                                          | <input type="checkbox"/> <sub>2</sub> | <input type="checkbox"/> <sub>3</sub> | <input type="checkbox"/> <sub>0</sub> |                              |
| Nose               | <input type="checkbox"/> <sub>1</sub>                                                                          | <input type="checkbox"/> <sub>2</sub> | <input type="checkbox"/> <sub>3</sub> | <input type="checkbox"/> <sub>0</sub> |                              |
| Larynx             | <input type="checkbox"/> <sub>1</sub>                                                                          | <input type="checkbox"/> <sub>2</sub> | <input type="checkbox"/> <sub>3</sub> | <input type="checkbox"/> <sub>0</sub> |                              |
| Neck and thyroid   | <input type="checkbox"/> <sub>1</sub>                                                                          | <input type="checkbox"/> <sub>2</sub> | <input type="checkbox"/> <sub>3</sub> | <input type="checkbox"/> <sub>0</sub> |                              |
| Skin               | <input type="checkbox"/> <sub>1</sub>                                                                          | <input type="checkbox"/> <sub>2</sub> | <input type="checkbox"/> <sub>3</sub> | <input type="checkbox"/> <sub>0</sub> |                              |

|                                    |                                               |
|------------------------------------|-----------------------------------------------|
| Protocol Number: KY2020-29         | <b>Extend Follow-Up</b>                       |
| Center Number <input type="text"/> | Subject Screening Number <input type="text"/> |
| Visit 7 (D28±2d)                   |                                               |

|                        |                            |                            |                            |                            |  |
|------------------------|----------------------------|----------------------------|----------------------------|----------------------------|--|
| Cardiovascular system  | <input type="checkbox"/> 1 | <input type="checkbox"/> 2 | <input type="checkbox"/> 3 | <input type="checkbox"/> 0 |  |
| Chest and lungs        | <input type="checkbox"/> 1 | <input type="checkbox"/> 2 | <input type="checkbox"/> 3 | <input type="checkbox"/> 0 |  |
| Abdomen                | <input type="checkbox"/> 1 | <input type="checkbox"/> 2 | <input type="checkbox"/> 3 | <input type="checkbox"/> 0 |  |
| Nervous system         | <input type="checkbox"/> 1 | <input type="checkbox"/> 2 | <input type="checkbox"/> 3 | <input type="checkbox"/> 0 |  |
| Musculoskeletal system | <input type="checkbox"/> 1 | <input type="checkbox"/> 2 | <input type="checkbox"/> 3 | <input type="checkbox"/> 0 |  |
| Lymphatic system       | <input type="checkbox"/> 1 | <input type="checkbox"/> 2 | <input type="checkbox"/> 3 | <input type="checkbox"/> 0 |  |

|                                                                                                                                                                                      |
|--------------------------------------------------------------------------------------------------------------------------------------------------------------------------------------|
| <b>Respiratory symptoms</b> <input type="checkbox"/> 0 Unexamined, reason _____                                                                                                      |
| Date: <input type="text"/>   <input type="text"/>   <input type="text"/>  YEAR  <input type="text"/>   <input type="text"/>  MONTH  <input type="text"/>   <input type="text"/>  DAY |
| Whether the subject has respiratory symptoms or not: <input type="checkbox"/> 0 NO <input type="checkbox"/> 1 YES, please describe: _____                                            |
| Result: <input type="checkbox"/> 1 Normal <input type="checkbox"/> 2 Abnormal, No Clinical significance <input type="checkbox"/> 3 Abnormal, Clinically significant                  |

| <b>Blood Count</b> <input type="checkbox"/> 0 Unexamined, reason _____                                                                                                                                                            |                                                                                        |      |                            |                            |                            |                            |  |
|-----------------------------------------------------------------------------------------------------------------------------------------------------------------------------------------------------------------------------------|----------------------------------------------------------------------------------------|------|----------------------------|----------------------------|----------------------------|----------------------------|--|
| Date: <input type="text"/>   <input type="text"/>   <input type="text"/>  YEAR  <input type="text"/>   <input type="text"/>  MONTH  <input type="text"/>   <input type="text"/>  DAY    Normal range Number: <input type="text"/> |                                                                                        |      |                            |                            |                            |                            |  |
| Item                                                                                                                                                                                                                              | Result                                                                                 |      | Result Interpretation      |                            |                            | Unexamined                 |  |
|                                                                                                                                                                                                                                   | Measured Value                                                                         | Unit | Normal                     | Abnormal                   |                            |                            |  |
|                                                                                                                                                                                                                                   |                                                                                        |      |                            | No Clinical significance   | Clinically significant     |                            |  |
| Red Blood Cell (RBC)                                                                                                                                                                                                              | <input type="checkbox"/> 1 10 <sup>12</sup> /L <input type="checkbox"/> 2 Other: _____ |      | <input type="checkbox"/> 1 | <input type="checkbox"/> 2 | <input type="checkbox"/> 3 | <input type="checkbox"/> 0 |  |
| White Blood Cell                                                                                                                                                                                                                  | <input type="checkbox"/> 1 10 <sup>9</sup> /L <input type="checkbox"/> 2 Other: _____  |      | <input type="checkbox"/> 1 | <input type="checkbox"/> 2 | <input type="checkbox"/> 3 | <input type="checkbox"/> 0 |  |
| Hemoglobin (Hb)                                                                                                                                                                                                                   | <input type="checkbox"/> 1 g/L <input type="checkbox"/> 2 Other: _____                 |      | <input type="checkbox"/> 1 | <input type="checkbox"/> 2 | <input type="checkbox"/> 3 | <input type="checkbox"/> 0 |  |
| Platelet (PLT)                                                                                                                                                                                                                    | <input type="checkbox"/> 1 10 <sup>9</sup> /L <input type="checkbox"/> 2 Other: _____  |      | <input type="checkbox"/> 1 | <input type="checkbox"/> 2 | <input type="checkbox"/> 3 | <input type="checkbox"/> 0 |  |
| Neutrophil (ANC)                                                                                                                                                                                                                  | <input type="checkbox"/> 1 10 <sup>9</sup> /L <input type="checkbox"/> 2 Other: _____  |      | <input type="checkbox"/> 1 | <input type="checkbox"/> 2 | <input type="checkbox"/> 3 | <input type="checkbox"/> 0 |  |
| Lymphocyte (LY)                                                                                                                                                                                                                   | <input type="checkbox"/> 1 10 <sup>9</sup> /L <input type="checkbox"/> 2 Other: _____  |      | <input type="checkbox"/> 1 | <input type="checkbox"/> 2 | <input type="checkbox"/> 3 | <input type="checkbox"/> 0 |  |
| Monocyte (MO)                                                                                                                                                                                                                     | <input type="checkbox"/> 1 10 <sup>9</sup> /L <input type="checkbox"/> 2 Other: _____  |      | <input type="checkbox"/> 1 | <input type="checkbox"/> 2 | <input type="checkbox"/> 3 | <input type="checkbox"/> 0 |  |
| Eosinophil (EO)                                                                                                                                                                                                                   | <input type="checkbox"/> 1 10 <sup>9</sup> /L <input type="checkbox"/> 2 Other: _____  |      | <input type="checkbox"/> 1 | <input type="checkbox"/> 2 | <input type="checkbox"/> 3 | <input type="checkbox"/> 0 |  |
| Basophil (BA)                                                                                                                                                                                                                     | <input type="checkbox"/> 1 10 <sup>9</sup> /L <input type="checkbox"/> 2 Other: _____  |      | <input type="checkbox"/> 1 | <input type="checkbox"/> 2 | <input type="checkbox"/> 3 | <input type="checkbox"/> 0 |  |

|                                                                                                                                                                                                                                   |  |  |  |  |  |  |  |
|-----------------------------------------------------------------------------------------------------------------------------------------------------------------------------------------------------------------------------------|--|--|--|--|--|--|--|
| <b>Blood Biochemistry</b> <input type="checkbox"/> 0 Unexamined, reason _____                                                                                                                                                     |  |  |  |  |  |  |  |
| Date: <input type="text"/>   <input type="text"/>   <input type="text"/>  YEAR  <input type="text"/>   <input type="text"/>  MONTH  <input type="text"/>   <input type="text"/>  DAY    Normal range Number: <input type="text"/> |  |  |  |  |  |  |  |

|                            |                                                  |                         |
|----------------------------|--------------------------------------------------|-------------------------|
| Protocol Number: KY2020-29 |                                                  | <b>Extend Follow-Up</b> |
| Center Number [ ] [ ] [ ]  | Subject Screening Number [ ] [ ] [ ] [ ] [ ] [ ] | Visit 7 (D28±2d)        |

| Item                                   | Result         |                                                                                                 | Result Interpretation                 |                                       |                                       | Unexamined                            |
|----------------------------------------|----------------|-------------------------------------------------------------------------------------------------|---------------------------------------|---------------------------------------|---------------------------------------|---------------------------------------|
|                                        | Measured Value | Unit                                                                                            | Normal                                | Abnormal                              |                                       |                                       |
|                                        |                |                                                                                                 |                                       | No Clinical significance              | Clinically significant                |                                       |
| Glutamic-pyruvic transaminase (ALT)    |                | <input type="checkbox"/> <sub>1</sub> U/L <input type="checkbox"/> <sub>2</sub> Other: _____    | <input type="checkbox"/> <sub>1</sub> | <input type="checkbox"/> <sub>2</sub> | <input type="checkbox"/> <sub>3</sub> | <input type="checkbox"/> <sub>0</sub> |
| Glutamic-oxalacetic transaminase (AST) |                | <input type="checkbox"/> <sub>1</sub> U/L <input type="checkbox"/> <sub>2</sub> Other: _____    | <input type="checkbox"/> <sub>1</sub> | <input type="checkbox"/> <sub>2</sub> | <input type="checkbox"/> <sub>3</sub> | <input type="checkbox"/> <sub>0</sub> |
| Total Bilirubin (TBIL)                 |                | <input type="checkbox"/> <sub>1</sub> µmol/L <input type="checkbox"/> <sub>2</sub> Other: _____ | <input type="checkbox"/> <sub>1</sub> | <input type="checkbox"/> <sub>2</sub> | <input type="checkbox"/> <sub>3</sub> | <input type="checkbox"/> <sub>0</sub> |
| Albumin (ALB)                          |                | <input type="checkbox"/> <sub>1</sub> g/L <input type="checkbox"/> <sub>2</sub> Other: _____    | <input type="checkbox"/> <sub>1</sub> | <input type="checkbox"/> <sub>2</sub> | <input type="checkbox"/> <sub>3</sub> | <input type="checkbox"/> <sub>0</sub> |
| γ- glutamyl transpeptidase (GGT)       |                | <input type="checkbox"/> <sub>1</sub> U/L <input type="checkbox"/> <sub>2</sub> Other: _____    | <input type="checkbox"/> <sub>1</sub> | <input type="checkbox"/> <sub>2</sub> | <input type="checkbox"/> <sub>3</sub> | <input type="checkbox"/> <sub>0</sub> |
| Lactic dehydrogenase (LDH)             |                | <input type="checkbox"/> <sub>1</sub> U/L <input type="checkbox"/> <sub>2</sub> Other: _____    | <input type="checkbox"/> <sub>1</sub> | <input type="checkbox"/> <sub>2</sub> | <input type="checkbox"/> <sub>3</sub> | <input type="checkbox"/> <sub>0</sub> |
| Creatine kinase (CK)                   |                | <input type="checkbox"/> <sub>1</sub> U/L <input type="checkbox"/> <sub>2</sub> Other: _____    | <input type="checkbox"/> <sub>1</sub> | <input type="checkbox"/> <sub>2</sub> | <input type="checkbox"/> <sub>3</sub> | <input type="checkbox"/> <sub>0</sub> |
| Creatine kinase isoenzyme (CK-MB)      |                | <input type="checkbox"/> <sub>1</sub> U/L <input type="checkbox"/> <sub>2</sub> Other: _____    | <input type="checkbox"/> <sub>1</sub> | <input type="checkbox"/> <sub>2</sub> | <input type="checkbox"/> <sub>3</sub> | <input type="checkbox"/> <sub>0</sub> |
| Blood urea nitrogen (BUN)              |                | <input type="checkbox"/> <sub>1</sub> mmol/L <input type="checkbox"/> <sub>2</sub> Other: _____ | <input type="checkbox"/> <sub>1</sub> | <input type="checkbox"/> <sub>2</sub> | <input type="checkbox"/> <sub>3</sub> | <input type="checkbox"/> <sub>0</sub> |
| Urea (Urea)                            |                | <input type="checkbox"/> <sub>1</sub> mmol/L <input type="checkbox"/> <sub>2</sub> Other: _____ | <input type="checkbox"/> <sub>1</sub> | <input type="checkbox"/> <sub>2</sub> | <input type="checkbox"/> <sub>3</sub> | <input type="checkbox"/> <sub>0</sub> |
| Serum creatinine (CR)                  |                | <input type="checkbox"/> <sub>1</sub> µmol/L <input type="checkbox"/> <sub>2</sub> Other: _____ | <input type="checkbox"/> <sub>1</sub> | <input type="checkbox"/> <sub>2</sub> | <input type="checkbox"/> <sub>3</sub> | <input type="checkbox"/> <sub>0</sub> |

| <b>Urine Test</b> <input type="checkbox"/> <sub>0</sub> Unexamined, reason_____                   |                |                                                                                                         |                                       |                                       |                                       |                                       |
|---------------------------------------------------------------------------------------------------|----------------|---------------------------------------------------------------------------------------------------------|---------------------------------------|---------------------------------------|---------------------------------------|---------------------------------------|
| Date: [ ] [ ] [ ] [ ]  YEAR  [ ] [ ]  MONTH  [ ] [ ]  DAY    Normal range Number: [ ] [ ] [ ] [ ] |                |                                                                                                         |                                       |                                       |                                       |                                       |
| Item                                                                                              | Result         |                                                                                                         | Result Interpretation                 |                                       |                                       | Unexamined                            |
|                                                                                                   | Measured Value | Unit                                                                                                    | Normal                                | Abnormal                              |                                       |                                       |
|                                                                                                   |                |                                                                                                         |                                       | No Clinical significance              | Clinically significant                |                                       |
| Urine Protein                                                                                     |                | <input type="checkbox"/> <sub>1</sub> Not Applicable <input type="checkbox"/> <sub>2</sub> Other: _____ | <input type="checkbox"/> <sub>1</sub> | <input type="checkbox"/> <sub>2</sub> | <input type="checkbox"/> <sub>3</sub> | <input type="checkbox"/> <sub>0</sub> |
| Urine Glucose                                                                                     |                | <input type="checkbox"/> <sub>1</sub> mmol/L <input type="checkbox"/> <sub>2</sub> Other: _____         | <input type="checkbox"/> <sub>1</sub> | <input type="checkbox"/> <sub>2</sub> | <input type="checkbox"/> <sub>3</sub> | <input type="checkbox"/> <sub>0</sub> |
| Urine PH value                                                                                    |                | <input type="checkbox"/> <sub>1</sub> Not Applicable <input type="checkbox"/> <sub>2</sub> Other: _____ | <input type="checkbox"/> <sub>1</sub> | <input type="checkbox"/> <sub>2</sub> | <input type="checkbox"/> <sub>3</sub> | <input type="checkbox"/> <sub>0</sub> |
| Urine Erythrocyte                                                                                 |                | <input type="checkbox"/> <sub>1</sub> Not Applicable <input type="checkbox"/> <sub>2</sub> Other: _____ | <input type="checkbox"/> <sub>1</sub> | <input type="checkbox"/> <sub>2</sub> | <input type="checkbox"/> <sub>3</sub> | <input type="checkbox"/> <sub>0</sub> |
| Urine Leukocyte                                                                                   |                | <input type="checkbox"/> <sub>1</sub> Not Applicable <input type="checkbox"/> <sub>2</sub> Other: _____ | <input type="checkbox"/> <sub>1</sub> | <input type="checkbox"/> <sub>2</sub> | <input type="checkbox"/> <sub>3</sub> | <input type="checkbox"/> <sub>0</sub> |
| Urine Ketone                                                                                      |                | <input type="checkbox"/> <sub>1</sub> Not Applicable <input type="checkbox"/> <sub>2</sub> Other: _____ | <input type="checkbox"/> <sub>1</sub> | <input type="checkbox"/> <sub>2</sub> | <input type="checkbox"/> <sub>3</sub> | <input type="checkbox"/> <sub>0</sub> |

|                                                                                           |
|-------------------------------------------------------------------------------------------|
| <b>Coagulation Function</b> <input type="checkbox"/> <sub>0</sub> Unexamined, reason_____ |
|-------------------------------------------------------------------------------------------|

|                                    |                                                                |
|------------------------------------|----------------------------------------------------------------|
| Protocol Number: KY2020-29         | <b>Extend Follow-Up</b>                                        |
| Center Number <input type="text"/> | Subject Screening Number <input type="text"/> Visit 7 (D28±2d) |

Date: |||YEAR|||MONTH|||DAY Normal range Number:

| Item                                         | Result         |                                                                                                         | Result Interpretation                 |                                       |                                       | Unexamined                            |
|----------------------------------------------|----------------|---------------------------------------------------------------------------------------------------------|---------------------------------------|---------------------------------------|---------------------------------------|---------------------------------------|
|                                              | Measured Value | Unit                                                                                                    | Normal                                | Abnormal                              |                                       |                                       |
|                                              |                |                                                                                                         |                                       | No Clinical significance              | Clinically significant                |                                       |
| Prothrombin Time (PT)                        |                | <input type="checkbox"/> <sub>1</sub> S <input type="checkbox"/> <sub>2</sub> Other: _____              | <input type="checkbox"/> <sub>1</sub> | <input type="checkbox"/> <sub>2</sub> | <input type="checkbox"/> <sub>3</sub> | <input type="checkbox"/> <sub>0</sub> |
| Activated Partial Thromboplastin Time (APTT) |                | <input type="checkbox"/> <sub>1</sub> S <input type="checkbox"/> <sub>2</sub> Other: _____              | <input type="checkbox"/> <sub>1</sub> | <input type="checkbox"/> <sub>2</sub> | <input type="checkbox"/> <sub>3</sub> | <input type="checkbox"/> <sub>0</sub> |
| Thrombin Time (TT)                           |                | <input type="checkbox"/> <sub>1</sub> S <input type="checkbox"/> <sub>2</sub> Other: _____              | <input type="checkbox"/> <sub>1</sub> | <input type="checkbox"/> <sub>2</sub> | <input type="checkbox"/> <sub>3</sub> | <input type="checkbox"/> <sub>0</sub> |
| Fibrinogen (Fbg)                             |                | <input type="checkbox"/> <sub>1</sub> g/L <input type="checkbox"/> <sub>2</sub> Other: _____            | <input type="checkbox"/> <sub>1</sub> | <input type="checkbox"/> <sub>2</sub> | <input type="checkbox"/> <sub>3</sub> | <input type="checkbox"/> <sub>0</sub> |
| International Normalized Ratio (INR)         |                | <input type="checkbox"/> <sub>1</sub> Not Applicable <input type="checkbox"/> <sub>2</sub> Other: _____ | <input type="checkbox"/> <sub>1</sub> | <input type="checkbox"/> <sub>2</sub> | <input type="checkbox"/> <sub>3</sub> | <input type="checkbox"/> <sub>0</sub> |

|                                                                                                                                                                                                                                |                |                                                                                               |                                       |                                       |                                       |
|--------------------------------------------------------------------------------------------------------------------------------------------------------------------------------------------------------------------------------|----------------|-----------------------------------------------------------------------------------------------|---------------------------------------|---------------------------------------|---------------------------------------|
| <b>C-REACTIVE PROTEIN (CRP)</b> <input type="checkbox"/> <sub>0</sub> Unexamined, reason _____                                                                                                                                 |                |                                                                                               |                                       |                                       |                                       |
| Date: <input type="text"/>   <input type="text"/>   <input type="text"/>  YEAR  <input type="text"/>   <input type="text"/>  MONTH  <input type="text"/>   <input type="text"/>  DAY Normal range Number: <input type="text"/> |                |                                                                                               |                                       |                                       |                                       |
| <b>Item</b>                                                                                                                                                                                                                    | <b>Result</b>  | <b>Result Interpretation</b>                                                                  |                                       |                                       |                                       |
| C-REACTIVE PROTEIN (CRP)                                                                                                                                                                                                       | Measured Value | Unit                                                                                          | Normal                                | Abnormal                              |                                       |
|                                                                                                                                                                                                                                |                |                                                                                               |                                       | No Clinical significance              | Clinically significant                |
|                                                                                                                                                                                                                                |                | <input type="checkbox"/> <sub>1</sub> mg/L <input type="checkbox"/> <sub>2</sub> Other: _____ | <input type="checkbox"/> <sub>1</sub> | <input type="checkbox"/> <sub>2</sub> | <input type="checkbox"/> <sub>3</sub> |

|                                                                                                                                                                                                                                |                |                                                                                               |                                       |                                       |                                       |
|--------------------------------------------------------------------------------------------------------------------------------------------------------------------------------------------------------------------------------|----------------|-----------------------------------------------------------------------------------------------|---------------------------------------|---------------------------------------|---------------------------------------|
| <b>Erythrocyte Sedimentation Rate (ESR)</b> <input type="checkbox"/> <sub>0</sub> Unexamined, reason _____                                                                                                                     |                |                                                                                               |                                       |                                       |                                       |
| Date: <input type="text"/>   <input type="text"/>   <input type="text"/>  YEAR  <input type="text"/>   <input type="text"/>  MONTH  <input type="text"/>   <input type="text"/>  DAY Normal range Number: <input type="text"/> |                |                                                                                               |                                       |                                       |                                       |
| <b>Item</b>                                                                                                                                                                                                                    | <b>Result</b>  | <b>Result Interpretation</b>                                                                  |                                       |                                       |                                       |
| Erythrocyte Sedimentation Rate (ESR)                                                                                                                                                                                           | Measured Value | Unit                                                                                          | Normal                                | Abnormal                              |                                       |
|                                                                                                                                                                                                                                |                |                                                                                               |                                       | No Clinical significance              | Clinically significant                |
|                                                                                                                                                                                                                                |                | <input type="checkbox"/> <sub>1</sub> mm/h <input type="checkbox"/> <sub>2</sub> Other: _____ | <input type="checkbox"/> <sub>1</sub> | <input type="checkbox"/> <sub>2</sub> | <input type="checkbox"/> <sub>3</sub> |

|                                                                                                                                                                                                                                |                |                                                                                                |                                       |                                       |                                       |
|--------------------------------------------------------------------------------------------------------------------------------------------------------------------------------------------------------------------------------|----------------|------------------------------------------------------------------------------------------------|---------------------------------------|---------------------------------------|---------------------------------------|
| <b>TNF-α</b> <input type="checkbox"/> <sub>0</sub> Unexamined, reason _____                                                                                                                                                    |                |                                                                                                |                                       |                                       |                                       |
| Date: <input type="text"/>   <input type="text"/>   <input type="text"/>  YEAR  <input type="text"/>   <input type="text"/>  MONTH  <input type="text"/>   <input type="text"/>  DAY Normal range Number: <input type="text"/> |                |                                                                                                |                                       |                                       |                                       |
| <b>Item</b>                                                                                                                                                                                                                    | <b>Result</b>  | <b>Result Interpretation</b>                                                                   |                                       |                                       |                                       |
| TNF-α                                                                                                                                                                                                                          | Measured Value | Unit                                                                                           | Normal                                | Abnormal                              |                                       |
|                                                                                                                                                                                                                                |                |                                                                                                |                                       | No Clinical significance              | Clinically significant                |
|                                                                                                                                                                                                                                |                | <input type="checkbox"/> <sub>1</sub> pg/mL <input type="checkbox"/> <sub>2</sub> Other: _____ | <input type="checkbox"/> <sub>1</sub> | <input type="checkbox"/> <sub>2</sub> | <input type="checkbox"/> <sub>3</sub> |

|                                                                            |
|----------------------------------------------------------------------------|
| <b>IL-6</b> <input type="checkbox"/> <sub>0</sub> Unexamined, reason _____ |
|----------------------------------------------------------------------------|

|                            |                                                                  |
|----------------------------|------------------------------------------------------------------|
| Protocol Number: KY2020-29 | <b>Extend Follow-Up</b>                                          |
| Center Number [ ] [ ] [ ]  | Subject Screening Number [ ] [ ] [ ] [ ] [ ] [ ] [ ] [ ] [ ] [ ] |
| Visit 7 (D28±2d)           |                                                                  |

Date : [ ] [ ] [ ] [ ] |YEAR| [ ] [ ] |MONTH| [ ] [ ] |DAY Normal range  
Number: [ ] [ ] [ ] [ ] [ ] [ ]

| Item                     | Result         |                                                                          | Result Interpretation      |                            |                            |
|--------------------------|----------------|--------------------------------------------------------------------------|----------------------------|----------------------------|----------------------------|
|                          | Measured Value | Unit                                                                     | Normal                     | Abnormal                   |                            |
| No Clinical significance |                |                                                                          |                            | Clinically significant     |                            |
| IL-6                     |                | <input type="checkbox"/> 1 pg/mL <input type="checkbox"/> 2 Other: _____ | <input type="checkbox"/> 1 | <input type="checkbox"/> 2 | <input type="checkbox"/> 3 |

**Routine 12 Leads Electrocardiogram**    0 Unexamined, reason \_\_\_\_\_

Date: [ ] [ ] [ ] [ ] |YEAR| [ ] [ ] |MONTH| [ ] [ ] |DAY

Result:    1 Normal    2 Abnormal, No Clinical significance    3 Abnormal Clinically significant

If "Abnormal", please describe: \_\_\_\_\_

**Chest CT**    0 Unexamined, reason \_\_\_\_\_

Date: [ ] [ ] [ ] [ ] |YEAR| [ ] [ ] |MONTH| [ ] [ ] |DAY

Result: \_\_\_\_\_

Whether chest CT lesion absorbed  $\geq 50\%$  than baseline??  
0 NO    1 YES    2 Unidentified    3 Unknown    4 Other, please describe: \_\_\_\_\_

**Nucleic Acid Test of 2019-nCov**    0 Unexamined, reason \_\_\_\_\_

Sampling Part (multiple choice):    1 Upper respiratory tract    2 Lower respiratory tract

|                         |                                                                                                                                                                                                                                              |
|-------------------------|----------------------------------------------------------------------------------------------------------------------------------------------------------------------------------------------------------------------------------------------|
| Upper respiratory tract | Date: [ ] [ ] [ ] [ ]  YEAR  [ ] [ ]  MONTH  [ ] [ ]  DAY<br>Result: <input type="checkbox"/> 1 Negative <input type="checkbox"/> 2 Positive <input type="checkbox"/> 3 Unidentified <input type="checkbox"/> 4 Other, please describe _____ |
| Lower respiratory tract | Date: [ ] [ ] [ ] [ ]  YEAR  [ ] [ ]  MONTH  [ ] [ ]  DAY<br>Result: <input type="checkbox"/> 1 Negative <input type="checkbox"/> 2 Positive <input type="checkbox"/> 3 Unidentified <input type="checkbox"/> 4 Other, please describe _____ |
| Result                  | <input type="checkbox"/> 1 Negative <input type="checkbox"/> 2 Positive <input type="checkbox"/> 3 Unidentified <input type="checkbox"/> 4 Other, please describe _____                                                                      |

**Pulse oxygen saturation (without oxygen inhalation )**    0 Unexamined, reason \_\_\_\_\_

Date: [ ] [ ] [ ] [ ] |YEAR| [ ] [ ] |MONTH| [ ] [ ] |DAY

|                            |                                                                  |
|----------------------------|------------------------------------------------------------------|
| Protocol Number: KY2020-29 | <b>Extend Follow-Up</b>                                          |
| Center Number [ ] [ ] [ ]  | Subject Screening Number [ ] [ ] [ ] [ ] [ ] [ ] [ ] [ ] [ ] [ ] |
| Visit 7 (D28±2d)           |                                                                  |

Measured Value: \_\_\_\_\_ % (Rest state)

**Arterial blood gas analysis**    <sub>0</sub> Unexamined, reason \_\_\_\_\_  
<sub>1</sub> Not applicable

Oxygen inhalation:    <sub>1</sub> No    <sub>2</sub> Yes, FiO<sub>2</sub>: \_\_\_\_\_ %

Date: [ ] [ ] [ ] [ ] | YEAR | [ ] [ ] | MONTH | [ ] [ ] | DAY  
Normal range Number: [ ] [ ] [ ] [ ] [ ] [ ]

| Item             | Result         |                                                                                               | Result Interpretation                 |                                       |                                       | Unexamined                            |
|------------------|----------------|-----------------------------------------------------------------------------------------------|---------------------------------------|---------------------------------------|---------------------------------------|---------------------------------------|
|                  | Measured Value | Unit                                                                                          | Normal                                | Abnormal                              |                                       |                                       |
|                  |                |                                                                                               |                                       | No Clinical significance              | Clinical significance                 |                                       |
| PaO <sub>2</sub> |                | <input type="checkbox"/> <sub>1</sub> mmHg <input type="checkbox"/> <sub>2</sub> Other: _____ | <input type="checkbox"/> <sub>1</sub> | <input type="checkbox"/> <sub>2</sub> | <input type="checkbox"/> <sub>3</sub> | <input type="checkbox"/> <sub>0</sub> |
| SaO <sub>2</sub> |                | <input type="checkbox"/> <sub>1</sub> % <input type="checkbox"/> <sub>2</sub> Other: _____    | <input type="checkbox"/> <sub>1</sub> | <input type="checkbox"/> <sub>2</sub> | <input type="checkbox"/> <sub>3</sub> | <input type="checkbox"/> <sub>0</sub> |

**Clinical state**    <sub>0</sub> Unexamined, reason \_\_\_\_\_

Date: [ ] [ ] [ ] [ ] | YEAR | [ ] [ ] | MONTH | [ ] [ ] | DAY

|        |                                                                                                                                                                                                                                                                                                                                                                                                                                                                                                                                                                                                                                                                             |
|--------|-----------------------------------------------------------------------------------------------------------------------------------------------------------------------------------------------------------------------------------------------------------------------------------------------------------------------------------------------------------------------------------------------------------------------------------------------------------------------------------------------------------------------------------------------------------------------------------------------------------------------------------------------------------------------------|
| Result | <input type="checkbox"/> <sub>1</sub> Level 1: Discharge<br><input type="checkbox"/> <sub>2</sub> Level 2: Hospitalization, no requirement for oxygen therapy<br><input type="checkbox"/> <sub>3</sub> Level 3: Hospitalization, requiring oxygen therapy (non-NIV / HFNC)<br><input type="checkbox"/> <sub>4</sub> Level 4: ICU / Hospitalization, requiring non-invasive mechanical ventilation (NIV) / High Flow Nasal Catheter Oxygen Therapy (HFNC)<br><input type="checkbox"/> <sub>5</sub> Level 5: ICU, requiring extracorporeal membrane oxygenation (ECMO) and / or invasive mechanical ventilation (IMV)<br><input type="checkbox"/> <sub>6</sub> Level 6: Death |
|--------|-----------------------------------------------------------------------------------------------------------------------------------------------------------------------------------------------------------------------------------------------------------------------------------------------------------------------------------------------------------------------------------------------------------------------------------------------------------------------------------------------------------------------------------------------------------------------------------------------------------------------------------------------------------------------------|

**If any adverse events have occurred since the last visit, please fill in the “adverse events” form. If there is medication combination, please fill in the “previous/combined medication” form; If there is combined non-drug therapy, please fill in the “combined non-drug therapy” form; If there is an out-of-plan inspection, please fill in the “out-of-plan inspection” form; If there is IMV/NIV、ECMO、HFNC、oxygen therapy, please fill in the “IMV/NIV、ECMO、HFNC、oxygen therapy” form.**

|                            |                                 |                          |
|----------------------------|---------------------------------|--------------------------|
| Protocol Number: KY2020-29 |                                 | <b>Usage of the Drug</b> |
| Center Number  __ _        | Subject Screening Number  _____ |                          |

Does the subject use the drug studied?       **0 NO**       **1 YES**       **2 Not applicable (Control Group)**

**Situation of Drug Usage**

| Days of taking the drug | Whether use the drug                                                          | Usage Date                         | Planned daily dosage (mg) | Actual daily dosage (mg) | Frequency (1) | Delivery (2) | State the reason in case of adjustment or suspension                                            | Please explain in case of missed, overdose or other situation |
|-------------------------|-------------------------------------------------------------------------------|------------------------------------|---------------------------|--------------------------|---------------|--------------|-------------------------------------------------------------------------------------------------|---------------------------------------------------------------|
| Day__                   | <input type="checkbox"/> <b>0 NO</b><br><input type="checkbox"/> <b>1 YES</b> | _____ YEAR<br> __ MONTH<br> __ DAY | _____                     | _____                    | __ <br>_____  | __ <br>_____ | <input type="checkbox"/> <b>1 AE, Number__</b><br><input type="checkbox"/> <b>2 Other, ____</b> |                                                               |
| Day__                   | <input type="checkbox"/> <b>0 NO</b><br><input type="checkbox"/> <b>1 YES</b> | _____ YEAR<br> __ MONTH<br> __ DAY | _____                     | _____                    | __ <br>_____  | __ <br>_____ | <input type="checkbox"/> <b>1 AE, Number__</b><br><input type="checkbox"/> <b>2 Other, ____</b> |                                                               |
| Day__                   | <input type="checkbox"/> <b>0 NO</b><br><input type="checkbox"/> <b>1 YES</b> | _____ YEAR<br> __ MONTH<br> __ DAY | _____                     | _____                    | __ <br>_____  | __ <br>_____ | <input type="checkbox"/> <b>1 AE, Number__</b><br><input type="checkbox"/> <b>2 Other, ____</b> |                                                               |
| Day__                   | <input type="checkbox"/> <b>0 NO</b><br><input type="checkbox"/> <b>1 YES</b> | _____ YEAR<br> __ MONTH<br> __ DAY | _____                     | _____                    | __ <br>_____  | __ <br>_____ | <input type="checkbox"/> <b>1 AE, Number__</b><br><input type="checkbox"/> <b>2 Other, ____</b> |                                                               |



|                                    |                                               |                          |
|------------------------------------|-----------------------------------------------|--------------------------|
| Protocol Number: KY2020-29         |                                               | <b>Usage of the Drug</b> |
| Center Number <input type="text"/> | Subject Screening Number <input type="text"/> |                          |

|                                                                                                                                                                                                                                                                                  |                                                                 |                                                                                     |                      |                      |                      |                      |                                                                                   |  |
|----------------------------------------------------------------------------------------------------------------------------------------------------------------------------------------------------------------------------------------------------------------------------------|-----------------------------------------------------------------|-------------------------------------------------------------------------------------|----------------------|----------------------|----------------------|----------------------|-----------------------------------------------------------------------------------|--|
| <b>Day__</b>                                                                                                                                                                                                                                                                     | <input type="checkbox"/> 0 NO<br><input type="checkbox"/> 1 YES | <input type="text"/> YEAR<br><input type="text"/> MONTH<br><input type="text"/> DAY | <input type="text"/> | <input type="text"/> | <input type="text"/> | <input type="text"/> | <input type="checkbox"/> 1 AE, Number__<br><input type="checkbox"/> 2 Other, ____ |  |
| <p>(1) Frequency: 1= three times a day 2= twice a day 3= once a day 4= unknown 5= others, please specify in the line<br/>         (2) Delivery: 1= not applicable 2= dose adjustment 3= missed 4= overdose 5= suspended administration 6= others, please specify in the line</p> |                                                                 |                                                                                     |                      |                      |                      |                      |                                                                                   |  |

| Does the subject use the drug studied? <input type="checkbox"/> 0 NO <input type="checkbox"/> 1 YES <input type="checkbox"/> 2 Not applicable (Control Group) |                                                                 |                                                                                     |                           |                          |                      |                      |                                                                                   |                                                               |
|---------------------------------------------------------------------------------------------------------------------------------------------------------------|-----------------------------------------------------------------|-------------------------------------------------------------------------------------|---------------------------|--------------------------|----------------------|----------------------|-----------------------------------------------------------------------------------|---------------------------------------------------------------|
| <b>Situation of Drug Usage</b>                                                                                                                                |                                                                 |                                                                                     |                           |                          |                      |                      |                                                                                   |                                                               |
| Days of taking the drug                                                                                                                                       | Whether use the drug                                            | Usage Date                                                                          | Planned daily dosage (mg) | Actual daily dosage (mg) | Frequency (1)        | Delivery (2)         | State the reason in case of dose adjustment or suspension                         | Please explain in case of missed, overdose or other situation |
| <b>Day__</b>                                                                                                                                                  | <input type="checkbox"/> 0 NO<br><input type="checkbox"/> 1 YES | <input type="text"/> YEAR<br><input type="text"/> MONTH<br><input type="text"/> DAY | <input type="text"/>      | <input type="text"/>     | <input type="text"/> | <input type="text"/> | <input type="checkbox"/> 1 AE, Number__<br><input type="checkbox"/> 2 Other, ____ |                                                               |
| <b>Day__</b>                                                                                                                                                  | <input type="checkbox"/> 0 NO<br><input type="checkbox"/> 1 YES | <input type="text"/> YEAR<br><input type="text"/> MONTH<br><input type="text"/> DAY | <input type="text"/>      | <input type="text"/>     | <input type="text"/> | <input type="text"/> | <input type="checkbox"/> 1 AE, Number__<br><input type="checkbox"/> 2 Other, ____ |                                                               |
| <b>Day__</b>                                                                                                                                                  | <input type="checkbox"/> 0 NO<br><input type="checkbox"/> 1 YES | <input type="text"/> YEAR<br><input type="text"/> MONTH<br><input type="text"/> DAY | <input type="text"/>      | <input type="text"/>     | <input type="text"/> | <input type="text"/> | <input type="checkbox"/> 1 AE, Number__<br><input type="checkbox"/> 2 Other, ____ |                                                               |

Protocol Number: KY2020-29

Center Number [ ][ ]

Subject Screening Number [ ][ ][ ][ ][ ][ ]

**Usage of the Drug**

|                                                                                                                                                                                                                                                                          |                                                                 |                                                 |                 |                 |                 |                 |                                                                                    |  |
|--------------------------------------------------------------------------------------------------------------------------------------------------------------------------------------------------------------------------------------------------------------------------|-----------------------------------------------------------------|-------------------------------------------------|-----------------|-----------------|-----------------|-----------------|------------------------------------------------------------------------------------|--|
| <b>Day__</b>                                                                                                                                                                                                                                                             | <input type="checkbox"/> 0 NO<br><input type="checkbox"/> 1 YES | [ ][ ][ ][ ] YEAR<br>[ ][ ] MONTH<br>[ ][ ] DAY | [ ][ ][ ][ ][ ] | [ ][ ][ ][ ][ ] | [ ][ ]<br>_____ | [ ][ ]<br>_____ | <input type="checkbox"/> 1 AE, Number__<br><input type="checkbox"/> 2 Other, _____ |  |
| <b>Day__</b>                                                                                                                                                                                                                                                             | <input type="checkbox"/> 0 NO<br><input type="checkbox"/> 1 YES | [ ][ ][ ][ ] YEAR<br>[ ][ ] MONTH<br>[ ][ ] DAY | [ ][ ][ ][ ][ ] | [ ][ ][ ][ ][ ] | [ ][ ]<br>_____ | [ ][ ]<br>_____ | <input type="checkbox"/> 1 AE, Number__<br><input type="checkbox"/> 2 Other, _____ |  |
| <p>(1) Frequency: 1= three times a day 2= twice a day 3= once a day 4= unknown 5= others, please specify in the line<br/> (2) Delivery: 1= not applicable 2= dose adjustment 3= missed 4= overdose 5= suspended administration 6= others, please specify in the line</p> |                                                                 |                                                 |                 |                 |                 |                 |                                                                                    |  |

|                                                                                                                                  |                       |
|----------------------------------------------------------------------------------------------------------------------------------|-----------------------|
| Protocol Number: KY2020-29                                                                                                       | <b>Adverse Events</b> |
| Center Number <input type="text" value="___"/> Subject Screening Number <input style="width: 100px;" type="text" value="_____"/> |                       |

Did the subject experience any adverse event?     0 NO     1 YES, please fill in refer to the code at the bottom of the form

**Adverse Events?**

| NO.                            | Adverse Event | Date Of beginning                                                                                                             | Sustained at the end of the study? |                                                                                                | CTCAE Level (1)                  | Taken Measurements                                    |                                           | Relationship with the studied drug (4) | AE Outcome (5)                   | SAE or Not?                  |                                  |
|--------------------------------|---------------|-------------------------------------------------------------------------------------------------------------------------------|------------------------------------|------------------------------------------------------------------------------------------------|----------------------------------|-------------------------------------------------------|-------------------------------------------|----------------------------------------|----------------------------------|------------------------------|----------------------------------|
|                                |               |                                                                                                                               | YES                                | NO→Date of End                                                                                 |                                  | Measurement for the studied drug (2)                  | Other measurement (3)                     |                                        |                                  | No                           | YES, the specific SAE type (6)   |
| 1                              |               | <input type="text" value="_____ YE"/><br>AR <input type="text" value="___"/>  MONT<br>H <input type="text" value="___"/>  DAY | <input type="checkbox"/>           | <input type="text" value="_____ YEA"/><br>R <input type="text" value="___"/>  MONTH <br>__ DAY | <input type="text" value="___"/> | <input type="text" value="___"/><br>_____             | <input type="text" value="___"/><br>_____ | <input type="text" value="___"/>       | <input type="text" value="___"/> | <input type="checkbox"/>     | <input type="text" value="___"/> |
| 2                              |               | <input type="text" value="_____ YE"/><br>AR <input type="text" value="___"/>  MONT<br>H <input type="text" value="___"/>  DAY | <input type="checkbox"/>           | <input type="text" value="_____ YEA"/><br>R <input type="text" value="___"/>  MONTH <br>__ DAY | <input type="text" value="___"/> | <input type="text" value="___"/><br>_____             | <input type="text" value="___"/><br>_____ | <input type="text" value="___"/>       | <input type="text" value="___"/> | <input type="checkbox"/>     | <input type="text" value="___"/> |
| 3                              |               | <input type="text" value="_____ YE"/><br>AR <input type="text" value="___"/>  MONT<br>H <input type="text" value="___"/>  DAY | <input type="checkbox"/>           | <input type="text" value="_____ YEA"/><br>R <input type="text" value="___"/>  MONTH <br>__ DAY | <input type="text" value="___"/> | <input type="text" value="___"/><br>_____             | <input type="text" value="___"/><br>_____ | <input type="text" value="___"/>       | <input type="text" value="___"/> | <input type="checkbox"/>     | <input type="text" value="___"/> |
| 4                              |               | <input type="text" value="_____ YE"/><br>AR <input type="text" value="___"/>  MONT<br>H <input type="text" value="___"/>  DAY | <input type="checkbox"/>           | <input type="text" value="_____ YEA"/><br>R <input type="text" value="___"/>  MONTH <br>__ DAY | <input type="text" value="___"/> | <input type="text" value="___"/><br>_____             | <input type="text" value="___"/><br>_____ | <input type="text" value="___"/>       | <input type="text" value="___"/> | <input type="checkbox"/>     | <input type="text" value="___"/> |
| <b>(1)<br/>CTCAE<br/>Level</b> |               | <b>(2) Measurement for the<br/>studied drug</b>                                                                               |                                    | <b>(3) Other<br/>measurements</b>                                                              |                                  | <b>(4) Relationship<br/>with the studied<br/>drug</b> |                                           | <b>(5) AE outcome</b>                  |                                  | <b>(6) Specific SAE type</b> |                                  |

|                                                                                                                                                                                                                                     |                       |
|-------------------------------------------------------------------------------------------------------------------------------------------------------------------------------------------------------------------------------------|-----------------------|
| Protocol Number: KY2020-29                                                                                                                                                                                                          | <b>Adverse Events</b> |
| Center Number <input type="text"/> <input type="text"/> <input type="text"/> Subject Screening Number <input type="text"/> <input type="text"/> <input type="text"/> <input type="text"/> <input type="text"/> <input type="text"/> |                       |

|                                                               |                                                                                                                                                       |                                                                                                                                                                                                 |                                                                                                                                                                             |                                                                                                                                            |                                                                                                                                                                                                                                                       |
|---------------------------------------------------------------|-------------------------------------------------------------------------------------------------------------------------------------------------------|-------------------------------------------------------------------------------------------------------------------------------------------------------------------------------------------------|-----------------------------------------------------------------------------------------------------------------------------------------------------------------------------|--------------------------------------------------------------------------------------------------------------------------------------------|-------------------------------------------------------------------------------------------------------------------------------------------------------------------------------------------------------------------------------------------------------|
| 1=level 1<br>2=level 2<br>3=level 3<br>4=level 4<br>5=level 5 | 1=Maintenance of current treatment<br>2=Suspension<br>3=Termination<br>4=Reduce the dose<br>5=Not applicable<br>6= Others, please specify in the line | 1= No<br>2= Combined medication, fill in the Combined Medication Form<br>3= Combined with non-drug therapy, fill in the Combined non-drug therapy Form<br>4= Others, please specify in the line | 1=Certainly related<br>2=Probably related<br>3=Possibly related<br>4= Possibly non-related<br>5= Certainly non-related<br>6= Remain to be evaluated<br>7=Unable to evaluate | 1 = unchanged<br>2=deterioration<br>3= recovery/healing<br>4=improvement/recovery<br>5= recovery with sequelae<br>6 = death<br>7 = unknown | 1= life threatening<br>2= cause death<br>3= require hospitalization or extend the current stay<br>4= cause permanent or significant disability or dysfunction<br>5= causes congenital malformation/birth defects<br>6= other important medical events |
|---------------------------------------------------------------|-------------------------------------------------------------------------------------------------------------------------------------------------------|-------------------------------------------------------------------------------------------------------------------------------------------------------------------------------------------------|-----------------------------------------------------------------------------------------------------------------------------------------------------------------------------|--------------------------------------------------------------------------------------------------------------------------------------------|-------------------------------------------------------------------------------------------------------------------------------------------------------------------------------------------------------------------------------------------------------|

**Did the subject experience any adverse event?**     **0 NO**     **1 YES**, please fill in refer to the code at the bottom of the form

**Adverse Events?**

| NO.      | Adverse Event | Date Of beginning                                                                                                                                                                                       | Sustained at the end of the study? |                                                                                                                                                                                                    | CTCAE Level (1)      | Taken Measurements                   |                               | Relationship with the study    | AE Outcome (5)       | SAE or Not?              |                                |
|----------|---------------|---------------------------------------------------------------------------------------------------------------------------------------------------------------------------------------------------------|------------------------------------|----------------------------------------------------------------------------------------------------------------------------------------------------------------------------------------------------|----------------------|--------------------------------------|-------------------------------|--------------------------------|----------------------|--------------------------|--------------------------------|
|          |               |                                                                                                                                                                                                         | YES                                | NO→Date of End                                                                                                                                                                                     |                      | Measurement for the studied drug (2) | Other measurement (3)         |                                |                      | No                       | YES, the specific SAE type (6) |
| <b>1</b> |               | <input type="text"/> <input type="text"/> <input type="text"/> <input type="text"/>  Y<br>EAR  <input type="text"/> <input type="text"/>  MO<br>NTH  <input type="text"/> <input type="text"/>  DA<br>Y | <input type="checkbox"/>           | <input type="text"/> <input type="text"/> <input type="text"/> <input type="text"/>  YEA<br>R  <input type="text"/> <input type="text"/>  MONTH <br><input type="text"/> <input type="text"/>  DAY | <input type="text"/> | <input type="text"/><br>_____        | <input type="text"/><br>_____ | <input type="text"/><br> <br>_ | <input type="text"/> | <input type="checkbox"/> | <input type="text"/>           |
| <b>2</b> |               | <input type="text"/> <input type="text"/> <input type="text"/> <input type="text"/>  Y<br>EAR  <input type="text"/> <input type="text"/>  MO<br>NTH  <input type="text"/> <input type="text"/>  DA<br>Y | <input type="checkbox"/>           | <input type="text"/> <input type="text"/> <input type="text"/> <input type="text"/>  YEA<br>R  <input type="text"/> <input type="text"/>  MONTH <br><input type="text"/> <input type="text"/>  DAY | <input type="text"/> | <input type="text"/><br>_____        | <input type="text"/><br>_____ | <input type="text"/><br> <br>_ | <input type="text"/> | <input type="checkbox"/> | <input type="text"/>           |

|                            |                                 |                       |
|----------------------------|---------------------------------|-----------------------|
| Protocol Number: KY2020-29 |                                 | <b>Adverse Events</b> |
| Center Number  __          | Subject Screening Number  _____ |                       |

| <b>3</b>                                                      | _____ Y<br>EAR __ MO<br>NTH __ DA<br>Y                                                                                                                      | <input type="checkbox"/>                                                                                                                                                                                     | _____ YEA<br>R __ MONTH <br>__ DAY                                                                                                                                              | _                                                                                                                                          | _ <br>_____                                                                                                                                                                                                                                                    | _ <br>_____    | _ <br> _              | _ | <input type="checkbox"/> | _ |
|---------------------------------------------------------------|-------------------------------------------------------------------------------------------------------------------------------------------------------------|--------------------------------------------------------------------------------------------------------------------------------------------------------------------------------------------------------------|---------------------------------------------------------------------------------------------------------------------------------------------------------------------------------|--------------------------------------------------------------------------------------------------------------------------------------------|----------------------------------------------------------------------------------------------------------------------------------------------------------------------------------------------------------------------------------------------------------------|----------------|-----------------------|---|--------------------------|---|
| <b>4</b>                                                      | _____ Y<br>EAR __ MO<br>NTH __ DA<br>Y                                                                                                                      | <input type="checkbox"/>                                                                                                                                                                                     | _____ YEA<br>R __ MONTH <br>__ DAY                                                                                                                                              | _                                                                                                                                          | _ <br>_____                                                                                                                                                                                                                                                    | _ <br>_____    | _ <br> _              | _ | <input type="checkbox"/> | _ |
| (1)<br>CTCAE<br>Level                                         | (2) Measurement for the<br>studied drug                                                                                                                     |                                                                                                                                                                                                              | (3) Other<br>measurements                                                                                                                                                       | (4) Relationship<br>with the studied<br>drug                                                                                               |                                                                                                                                                                                                                                                                | (5) AE outcome | (6) Specific SAE type |   |                          |   |
| 1=level 1<br>2=level 2<br>3=level 3<br>4=level 4<br>5=level 5 | 1=Maintenance of current<br>treatment<br>2=Suspension<br>3=Termination<br>4=Reduce the dose<br>5=Not applicable<br>6= Others, please specify<br>in the line | 1= No<br>2= Combined medication, fill in the<br>Combined Medication Form<br>3= Combined with non-drug<br>therapy, fill in the Combined non-<br>drug therapy Form<br>4= Others, please specify in the<br>line | 1=Certainly related<br>2=Probably related<br>3=Possibly related<br>4= Possibly non-related<br>5= Certainly non- related<br>6= Remain to be<br>evaluated<br>7=Unable to evaluate | 1 = unchanged<br>2=deterioration<br>3= recovery/healing<br>4=improvement/recovery<br>5= recovery with sequelae<br>6 = death<br>7 = unknown | 1= life threatening<br>2= cause death<br>3= require hospitalization or extend the<br>current stay<br>4= cause permanent or significant<br>disability or dysfunction<br>5= causes congenital malformation/birth<br>defects<br>6= other important medical events |                |                       |   |                          |   |

|                                                |                                              |
|------------------------------------------------|----------------------------------------------|
| Protocol Number: KY2020-29                     | <b>IMV/NIV、ECMO、HFNC、<br/>Oxygen Therapy</b> |
| Center Number <input type="text" value="___"/> |                                              |

**Does the subject have previous/combined medication?**  
 **NO**                       **YES, please fill in the form below refer to the code at the bottom of the table.**

**Previous/Combined medication**

| NO.      | Drug Name<br>(generic name) | Indications<br>(1)               | Indications<br>Notes | single<br>dose | Dose Unit<br>(2)                 | Dosing frequency<br>(3)          | administration<br>route<br>(4)   | Date of beginning              | Sustain at the end of the study? |                                 |
|----------|-----------------------------|----------------------------------|----------------------|----------------|----------------------------------|----------------------------------|----------------------------------|--------------------------------|----------------------------------|---------------------------------|
|          |                             |                                  |                      |                |                                  |                                  |                                  |                                | Yes                              | NO→Date of end                  |
| <b>1</b> |                             | <input type="text" value="___"/> |                      |                | <input type="text" value="___"/> | <input type="text" value="___"/> | <input type="text" value="___"/> | _____ YEAR __<br> MONTH __ DAY | <input type="checkbox"/>         | _____ YEAR __<br>_ MONTH __ DAY |
| <b>2</b> |                             | <input type="text" value="___"/> |                      |                | <input type="text" value="___"/> | <input type="text" value="___"/> | <input type="text" value="___"/> | _____ YEAR __<br> MONTH __ DAY | <input type="checkbox"/>         | _____ YEAR __<br>_ MONTH __ DAY |
| <b>3</b> |                             | <input type="text" value="___"/> |                      |                | <input type="text" value="___"/> | <input type="text" value="___"/> | <input type="text" value="___"/> | _____ YEAR __<br> MONTH __ DAY | <input type="checkbox"/>         | _____ YEAR __<br>_ MONTH __ DAY |
| <b>4</b> |                             | <input type="text" value="___"/> |                      |                | <input type="text" value="___"/> | <input type="text" value="___"/> | <input type="text" value="___"/> | _____ YEAR __<br> MONTH __ DAY | <input type="checkbox"/>         | _____ YEAR __<br>_ MONTH __ DAY |
| <b>5</b> |                             | <input type="text" value="___"/> |                      |                | <input type="text" value="___"/> | <input type="text" value="___"/> | <input type="text" value="___"/> | _____ YEAR __<br> MONTH __ DAY | <input type="checkbox"/>         | _____ YEAR __<br>_ MONTH __ DAY |

| (1) Indications                                                                                                                                                                     | (2) dosage Unit                                                                                                                                                                                                           | (3) Dosing frequency                                                                                                                                                                                                 | (4) administration route                                                                                                                                                                                                                                                   |
|-------------------------------------------------------------------------------------------------------------------------------------------------------------------------------------|---------------------------------------------------------------------------------------------------------------------------------------------------------------------------------------------------------------------------|----------------------------------------------------------------------------------------------------------------------------------------------------------------------------------------------------------------------|----------------------------------------------------------------------------------------------------------------------------------------------------------------------------------------------------------------------------------------------------------------------------|
| 1=Disease studied in this study<br>2= Previous history (please fill in the history number in the Notes)<br>3= Adverse events (please fill in the number of adverse events in Notes) | 1 = micrograms (µg)    6=Unit(U)<br>2 = milligram (mg)    7=Tablet(Tab)<br>3 = gram (g)            8=capsule (Cap)<br>4 = milliliter (mL)    9=Unknown<br>5 = International Unit (IU)    10=Other,please fill in the line | 1= Once a day (qd)    6=Once a week (qw)<br>2= Twice a day (bid)    7=Before sleep(hs)<br>3= Three times a day (tid)    8=As required (prn)<br>4= Four times a day    9=Unknown<br>10=Other, please fill in the line | 1=oral (PO)            7= Local (skin) (TOP)<br>2= intravenous    8= ophthalmus(OPH)<br>drop(IVgtt)            9=Inhalation(INH)<br>3=Intravenous        10=Unknown<br>injection(IV)         11= Other, please fill in the line<br>4=Intramuscular (IM)<br>5= Subcutaneous |

|                            |                                             |                                              |
|----------------------------|---------------------------------------------|----------------------------------------------|
| Protocol Number: KY2020-29 |                                             | <b>IMV/NIV、ECMO、HFNC、<br/>Oxygen Therapy</b> |
| Center Number [ ][ ]       | Subject Screening Number [ ][ ][ ][ ][ ][ ] |                                              |

|                                        |  |                                                                |                            |
|----------------------------------------|--|----------------------------------------------------------------|----------------------------|
| 4=Other (please describe in the Notes) |  | times a day<br>(qid)<br>5= once<br>every other<br>day<br>(qod) | (SQ)<br>6= sublingual (SL) |
|----------------------------------------|--|----------------------------------------------------------------|----------------------------|

| <b>Does the subject have previous/combined medication?</b>                                                                                          |                             |                    |                      |                |                      |                         |                                |                                                          |                                  |                                                    |
|-----------------------------------------------------------------------------------------------------------------------------------------------------|-----------------------------|--------------------|----------------------|----------------|----------------------|-------------------------|--------------------------------|----------------------------------------------------------|----------------------------------|----------------------------------------------------|
| <input type="checkbox"/> <b>NO</b> <input type="checkbox"/> <b>YES, please fill in the form below refer to the code at the bottom of the table.</b> |                             |                    |                      |                |                      |                         |                                |                                                          |                                  |                                                    |
| <b>Previous/Combined medication</b>                                                                                                                 |                             |                    |                      |                |                      |                         |                                |                                                          |                                  |                                                    |
| NO.                                                                                                                                                 | Drug Name<br>(generic name) | Indications<br>(1) | Indications<br>Notes | single<br>dose | Dose Unit<br>(2)     | Dosing frequency<br>(3) | administration<br>route<br>(4) | Date of beginning<br><br> _____ YEAR __<br> MONTH __ DAY | Sustain at the end of the study? |                                                    |
|                                                                                                                                                     |                             |                    |                      |                |                      |                         |                                |                                                          | Yes                              | NO-Date of end<br> _____ YEAR __<br>_ MONTH __ DAY |
| 1                                                                                                                                                   |                             | [ ][ ]             |                      |                | [ ][ ]               | [ ][ ]                  | [ ][ ]                         | _____ YEAR __<br> MONTH __ DAY                           | <input type="checkbox"/>         | _____ YEAR __<br>_ MONTH __ DAY                    |
| 2                                                                                                                                                   |                             | [ ][ ]             |                      |                | [ ][ ]               | [ ][ ]                  | [ ][ ]                         | _____ YEAR __<br> MONTH __ DAY                           | <input type="checkbox"/>         | _____ YEAR __<br>_ MONTH __ DAY                    |
| 3                                                                                                                                                   |                             | [ ][ ]             |                      |                | [ ][ ]               | [ ][ ]                  | [ ][ ]                         | _____ YEAR __<br> MONTH __ DAY                           | <input type="checkbox"/>         | _____ YEAR __<br>_ MONTH __ DAY                    |
| 4                                                                                                                                                   |                             | [ ][ ]             |                      |                | [ ][ ]               | [ ][ ]                  | [ ][ ]                         | _____ YEAR __<br> MONTH __ DAY                           | <input type="checkbox"/>         | _____ YEAR __<br>_ MONTH __ DAY                    |
| 5                                                                                                                                                   |                             | [ ][ ]             |                      |                | [ ][ ]               | [ ][ ]                  | [ ][ ]                         | _____ YEAR __<br> MONTH __ DAY                           | <input type="checkbox"/>         | _____ YEAR __<br>_ MONTH __ DAY                    |
| (1) Indications                                                                                                                                     |                             | (2) dosage Unit    |                      |                | (3) Dosing frequency |                         |                                | (4) administration route                                 |                                  |                                                    |

|                            |                                             |                                              |
|----------------------------|---------------------------------------------|----------------------------------------------|
| Protocol Number: KY2020-29 |                                             | <b>IMV/NIV、ECMO、HFNC、<br/>Oxygen Therapy</b> |
| Center Number [ ][ ]       | Subject Screening Number [ ][ ][ ][ ][ ][ ] |                                              |

|                                                                                                                                                                                                                                                  |                                                                                                                                                                                                                                                              |                                                                                                                                                                                                                                                                                                        |                                                                                                                                                                                                                                                                                                                       |
|--------------------------------------------------------------------------------------------------------------------------------------------------------------------------------------------------------------------------------------------------|--------------------------------------------------------------------------------------------------------------------------------------------------------------------------------------------------------------------------------------------------------------|--------------------------------------------------------------------------------------------------------------------------------------------------------------------------------------------------------------------------------------------------------------------------------------------------------|-----------------------------------------------------------------------------------------------------------------------------------------------------------------------------------------------------------------------------------------------------------------------------------------------------------------------|
| <p>1=Disease studied in this study</p> <p>2= Previous history (please fill in the history number in the Notes)</p> <p>3= Adverse events (please fill in the number of adverse events in Notes)</p> <p>4=Other (please describe in the Notes)</p> | <p>1 = micrograms (µg)</p> <p>2 = milligram (mg)</p> <p>3 = gram (g)</p> <p>4 = milliliter (mL)</p> <p>5 = International Unit (IU)</p> <p>6=Unit(U)</p> <p>7=Tablet(Tab)</p> <p>8=capsule (Cap)</p> <p>9=Unknown</p> <p>10=Other,please fill in the line</p> | <p>1= Once a day (qd)</p> <p>2= Twice a day (bid)</p> <p>3= Three times a day (tid)</p> <p>4= Four times a day (qid)</p> <p>5= once every other day (qod)</p> <p>6=Once a week (qw)</p> <p>7=Before sleep(hs)</p> <p>8=As required (prn)</p> <p>9=Unknown</p> <p>10=Other, please fill in the line</p> | <p>1=oral (PO)</p> <p>2= intravenous drop(IVgtt)</p> <p>3=Intravenous injection(IV)</p> <p>4=Intramuscular (IM)</p> <p>5= Subcutaneous (SQ)</p> <p>6= sublingual (SL)</p> <p>7= Local (skin) (TOP)</p> <p>8= ophthalmus(OPH)</p> <p>9=Inhalation(INH)</p> <p>10=Unknown</p> <p>11= Other, please fill in the line</p> |
|--------------------------------------------------------------------------------------------------------------------------------------------------------------------------------------------------------------------------------------------------|--------------------------------------------------------------------------------------------------------------------------------------------------------------------------------------------------------------------------------------------------------------|--------------------------------------------------------------------------------------------------------------------------------------------------------------------------------------------------------------------------------------------------------------------------------------------------------|-----------------------------------------------------------------------------------------------------------------------------------------------------------------------------------------------------------------------------------------------------------------------------------------------------------------------|



|                                 |                                              |
|---------------------------------|----------------------------------------------|
| Protocol Number: KY2020-29      | <b>IMV/NIV、ECMO、HFNC、<br/>Oxygen Therapy</b> |
| Center Number  __               |                                              |
| Subject Screening Number  _____ |                                              |

**Does the subject have previous/combined non-drug treatment?**       <sub>0</sub> **NO**       <sub>1</sub> **YES, Please continue to fill in the form below.**

| Previous/Combined non-drug treatment |                                                                      |                    |                       |                                       |                                  |                                          |                                                                            |
|--------------------------------------|----------------------------------------------------------------------|--------------------|-----------------------|---------------------------------------|----------------------------------|------------------------------------------|----------------------------------------------------------------------------|
| NO.                                  | Name of Treatment<br>(please describe in professional medical terms) | Indications<br>(1) | Notes for indications | Date of beginning                     | Sustain at the end of the study? |                                          | Whether it is the standard treatment recommended in the guidelines?<br>(2) |
|                                      |                                                                      |                    |                       |                                       | YES                              | NO→Date of end                           |                                                                            |
| 1                                    |                                                                      | __                 |                       | _____ YEAR __ __ MONTH<br>H __ __ DAY | <input type="checkbox"/>         | _____ YEA<br>R __ __ MONTH <br>__ __ DAY |                                                                            |
| 2                                    |                                                                      | __                 |                       | _____ YEAR __ __ MONTH<br>H __ __ DAY | <input type="checkbox"/>         | _____ YEA<br>R __ __ MONTH <br>__ __ DAY |                                                                            |
| 3                                    |                                                                      | __                 |                       | _____ YEAR __ __ MONTH<br>H __ __ DAY | <input type="checkbox"/>         | _____ YEA<br>R __ __ MONTH <br>__ __ DAY |                                                                            |
| 4                                    |                                                                      | __                 |                       | _____ YEAR __ __ MONTH<br>H __ __ DAY | <input type="checkbox"/>         | _____ YEA<br>R __ __ MONTH               |                                                                            |

|                            |                                 |                                              |
|----------------------------|---------------------------------|----------------------------------------------|
| Protocol Number: KY2020-29 |                                 | <b>IMV/NIV、ECMO、HFNC、<br/>Oxygen Therapy</b> |
| Center Number  __          | Subject Screening Number  _____ |                                              |

|          |  |    |  |                                      |                          |                                          |  |
|----------|--|----|--|--------------------------------------|--------------------------|------------------------------------------|--|
|          |  |    |  |                                      |                          | __ __ DAY                                |  |
| <b>5</b> |  | __ |  | _____ YEAR __ __ MONT<br>H __ __ DAY | <input type="checkbox"/> | _____ YEA<br>R __ __ MONTH <br>__ __ DAY |  |
| <b>6</b> |  | __ |  | _____ YEAR __ __ MONT<br>H __ __ DAY | <input type="checkbox"/> | _____ YEA<br>R __ __ MONTH <br>__ __ DAY |  |

(1) Indications: 1= Disease studied in this study 2= Previous history (please fill in the history number in the Notes) 3= Adverse events (please fill in the number of adverse events in Notes) 4=Other (please describe in the Notes)

(2) Whether it is the standard treatment recommended in the guidelines? 0=NO 1=YES 2=Not applicable

| Does the subject have previous/combined non-drug treatment? <input type="checkbox"/> <sub>0</sub> NO <input type="checkbox"/> <sub>1</sub> YES, Please continue to fill in the form below. |                                                                             |                        |                              |                          |                                         |                       |                                                                                |
|--------------------------------------------------------------------------------------------------------------------------------------------------------------------------------------------|-----------------------------------------------------------------------------|------------------------|------------------------------|--------------------------|-----------------------------------------|-----------------------|--------------------------------------------------------------------------------|
| <b>Previous/Combined non-drug treatment</b>                                                                                                                                                |                                                                             |                        |                              |                          |                                         |                       |                                                                                |
| <b>NO.</b>                                                                                                                                                                                 | <b>Name of Treatment</b><br>(please describe in professional medical terms) | <b>Indications (1)</b> | <b>Notes for indications</b> | <b>Date of beginning</b> | <b>Sustain at the end of the study?</b> |                       | <b>Whether it is the standard treatment recommended in the guidelines? (2)</b> |
|                                                                                                                                                                                            |                                                                             |                        |                              |                          | <b>YES</b>                              | <b>NO→Date of end</b> |                                                                                |

|                            |                                |                                              |
|----------------------------|--------------------------------|----------------------------------------------|
| Protocol Number: KY2020-29 |                                | <b>IMV/NIV、ECMO、HFNC、<br/>Oxygen Therapy</b> |
| Center Number  __          | Subject Screening Number  ____ |                                              |

|          |    |    |    |                               |                          |                                   |  |
|----------|----|----|----|-------------------------------|--------------------------|-----------------------------------|--|
| <b>1</b> | __ | __ | __ | ____ YEAR __ MONT<br>H __ DAY | <input type="checkbox"/> | ____ YEA<br>R __ MONTH <br>__ DAY |  |
| <b>2</b> | __ | __ | __ | ____ YEAR __ MONT<br>H __ DAY | <input type="checkbox"/> | ____ YEA<br>R __ MONTH <br>__ DAY |  |
| <b>3</b> | __ | __ | __ | ____ YEAR __ MONT<br>H __ DAY | <input type="checkbox"/> | ____ YEA<br>R __ MONTH <br>__ DAY |  |
| <b>4</b> | __ | __ | __ | ____ YEAR __ MONT<br>H __ DAY | <input type="checkbox"/> | ____ YEA<br>R __ MONTH <br>__ DAY |  |
| <b>5</b> | __ | __ | __ | ____ YEAR __ MONT<br>H __ DAY | <input type="checkbox"/> | ____ YEA<br>R __ MONTH <br>__ DAY |  |
| <b>6</b> | __ | __ | __ | ____ YEAR __ MONT<br>H __ DAY | <input type="checkbox"/> | ____ YEA<br>R __ MONTH <br>__ DAY |  |

|                                    |                                              |
|------------------------------------|----------------------------------------------|
| Protocol Number: KY2020-29         | <b>IMV/NIV、ECMO、HFNC、<br/>Oxygen Therapy</b> |
| Center Number <input type="text"/> |                                              |

**(1) Indications: 1= Disease studied in this study 2= Previous history (please fill in the history number in the Notes) 3= Adverse events (please fill in the number of adverse events in Notes) 4=Other (please describe in the Notes)**

**(2) Whether it is the standard treatment recommended in the guidelines? 0=NO 1=YES 2=Not applicable**

|                                    |                                               |                                              |
|------------------------------------|-----------------------------------------------|----------------------------------------------|
| Protocol Number: KY2020-29         |                                               | <b>IMV/NIV、ECMO、HFNC、<br/>Oxygen Therapy</b> |
| Center Number <input type="text"/> | Subject Screening Number <input type="text"/> |                                              |

| IMV/NIV、ECMO、HFNC、Oxygen Therapy |                                                                                                                                                                                                                                   |                                                                                                                                                                                    |                                             |                                                                                                                                     |                                             |
|----------------------------------|-----------------------------------------------------------------------------------------------------------------------------------------------------------------------------------------------------------------------------------|------------------------------------------------------------------------------------------------------------------------------------------------------------------------------------|---------------------------------------------|-------------------------------------------------------------------------------------------------------------------------------------|---------------------------------------------|
| No.                              | Name of Therapy                                                                                                                                                                                                                   | Date of the beginning                                                                                                                                                              | Time of the beginning                       | Date of the end                                                                                                                     | Time of the end                             |
|                                  | <input type="checkbox"/> <sub>1</sub> IMV <input type="checkbox"/> <sub>3</sub> ECMO <input type="checkbox"/> <sub>2</sub> NIV <input type="checkbox"/> <sub>4</sub><br>HFNC <input type="checkbox"/> <sub>5</sub> Oxygen Therapy | <input type="text"/>   <input type="text"/>   <input type="text"/>   <input type="text"/>  YEAR  <input type="text"/><br>_ MONTH  <input type="text"/>   <input type="text"/>  DAY | <input type="text"/> : <input type="text"/> | <input type="text"/>   <input type="text"/>  YEAR  <input type="text"/><br> MONTH  <input type="text"/>   <input type="text"/>  DAY | <input type="text"/> : <input type="text"/> |
|                                  | <input type="checkbox"/> <sub>1</sub> IMV <input type="checkbox"/> <sub>3</sub> ECMO <input type="checkbox"/> <sub>2</sub> NIV<br><input type="checkbox"/> <sub>4</sub> HFNC <input type="checkbox"/> <sub>5</sub> Oxygen Therapy | <input type="text"/>   <input type="text"/>   <input type="text"/>   <input type="text"/>  YEAR  <input type="text"/><br>_ MONTH  <input type="text"/>   <input type="text"/>  DAY | <input type="text"/> : <input type="text"/> | <input type="text"/>   <input type="text"/>  YEAR  <input type="text"/><br> MONTH  <input type="text"/>   <input type="text"/>  DAY | <input type="text"/> : <input type="text"/> |
|                                  | <input type="checkbox"/> <sub>1</sub> IMV <input type="checkbox"/> <sub>3</sub> ECMO <input type="checkbox"/> <sub>2</sub> NIV<br><input type="checkbox"/> <sub>4</sub> HFNC <input type="checkbox"/> <sub>5</sub> Oxygen Therapy | <input type="text"/>   <input type="text"/>   <input type="text"/>   <input type="text"/>  YEAR  <input type="text"/><br>_ MONTH  <input type="text"/>   <input type="text"/>  DAY | <input type="text"/> : <input type="text"/> | <input type="text"/>   <input type="text"/>  YEAR  <input type="text"/><br> MONTH  <input type="text"/>   <input type="text"/>  DAY | <input type="text"/> : <input type="text"/> |
|                                  | <input type="checkbox"/> <sub>1</sub> IMV <input type="checkbox"/> <sub>3</sub> ECMO <input type="checkbox"/> <sub>2</sub> NIV<br><input type="checkbox"/> <sub>4</sub> HFNC <input type="checkbox"/> <sub>5</sub> Oxygen Therapy | <input type="text"/>   <input type="text"/>   <input type="text"/>   <input type="text"/>  YEAR  <input type="text"/><br>_ MONTH  <input type="text"/>   <input type="text"/>  DAY | <input type="text"/> : <input type="text"/> | <input type="text"/>   <input type="text"/>  YEAR  <input type="text"/><br> MONTH  <input type="text"/>   <input type="text"/>  DAY | <input type="text"/> : <input type="text"/> |
|                                  | <input type="checkbox"/> <sub>1</sub> IMV <input type="checkbox"/> <sub>3</sub> ECMO <input type="checkbox"/> <sub>2</sub> NIV<br><input type="checkbox"/> <sub>4</sub> HFNC <input type="checkbox"/> <sub>5</sub> Oxygen Therapy | <input type="text"/>   <input type="text"/>   <input type="text"/>   <input type="text"/>  YEAR  <input type="text"/><br>_ MONTH  <input type="text"/>   <input type="text"/>  DAY | <input type="text"/> : <input type="text"/> | <input type="text"/>   <input type="text"/>  YEAR  <input type="text"/><br> MONTH  <input type="text"/>   <input type="text"/>  DAY | <input type="text"/> : <input type="text"/> |

|                                    |                                               |                                              |
|------------------------------------|-----------------------------------------------|----------------------------------------------|
| Protocol Number: KY2020-29         |                                               | <b>IMV/NIV、ECMO、HFNC、<br/>Oxygen Therapy</b> |
| Center Number <input type="text"/> | Subject Screening Number <input type="text"/> |                                              |

| IMV/NIV、ECMO、HFNC、Oxygen Therapy |                                                                                                                                                                                                                                   |                                                                                        |                                             |                                                                                       |                                             |
|----------------------------------|-----------------------------------------------------------------------------------------------------------------------------------------------------------------------------------------------------------------------------------|----------------------------------------------------------------------------------------|---------------------------------------------|---------------------------------------------------------------------------------------|---------------------------------------------|
| No.                              | Name of Therapy                                                                                                                                                                                                                   | Date of the beginning                                                                  | Time of the beginning                       | Date of the end                                                                       | Time of the end                             |
|                                  | <input type="checkbox"/> <sub>1</sub> IMV <input type="checkbox"/> <sub>3</sub> ECMO <input type="checkbox"/> <sub>2</sub> NIV <input type="checkbox"/> <sub>4</sub><br>HFNC <input type="checkbox"/> <sub>5</sub> Oxygen Therapy | <input type="text"/>  YEAR  <input type="text"/><br>_ MONTH  <input type="text"/>  DAY | <input type="text"/> : <input type="text"/> | <input type="text"/>  YEAR  <input type="text"/><br> MONTH  <input type="text"/>  DAY | <input type="text"/> : <input type="text"/> |
|                                  | <input type="checkbox"/> <sub>1</sub> IMV <input type="checkbox"/> <sub>3</sub> ECMO <input type="checkbox"/> <sub>2</sub> NIV<br><input type="checkbox"/> <sub>4</sub> HFNC <input type="checkbox"/> <sub>5</sub> Oxygen Therapy | <input type="text"/>  YEAR  <input type="text"/><br>_ MONTH  <input type="text"/>  DAY | <input type="text"/> : <input type="text"/> | <input type="text"/>  YEAR  <input type="text"/><br> MONTH  <input type="text"/>  DAY | <input type="text"/> : <input type="text"/> |
|                                  | <input type="checkbox"/> <sub>1</sub> IMV <input type="checkbox"/> <sub>3</sub> ECMO <input type="checkbox"/> <sub>2</sub> NIV<br><input type="checkbox"/> <sub>4</sub> HFNC <input type="checkbox"/> <sub>5</sub> Oxygen Therapy | <input type="text"/>  YEAR  <input type="text"/><br>_ MONTH  <input type="text"/>  DAY | <input type="text"/> : <input type="text"/> | <input type="text"/>  YEAR  <input type="text"/><br> MONTH  <input type="text"/>  DAY | <input type="text"/> : <input type="text"/> |
|                                  | <input type="checkbox"/> <sub>1</sub> IMV <input type="checkbox"/> <sub>3</sub> ECMO <input type="checkbox"/> <sub>2</sub> NIV<br><input type="checkbox"/> <sub>4</sub> HFNC <input type="checkbox"/> <sub>5</sub> Oxygen Therapy | <input type="text"/>  YEAR  <input type="text"/><br>_ MONTH  <input type="text"/>  DAY | <input type="text"/> : <input type="text"/> | <input type="text"/>  YEAR  <input type="text"/><br> MONTH  <input type="text"/>  DAY | <input type="text"/> : <input type="text"/> |
|                                  | <input type="checkbox"/> <sub>1</sub> IMV <input type="checkbox"/> <sub>3</sub> ECMO <input type="checkbox"/> <sub>2</sub> NIV<br><input type="checkbox"/> <sub>4</sub> HFNC <input type="checkbox"/> <sub>5</sub> Oxygen Therapy | <input type="text"/>  YEAR  <input type="text"/><br>_ MONTH  <input type="text"/>  DAY | <input type="text"/> : <input type="text"/> | <input type="text"/>  YEAR  <input type="text"/><br> MONTH  <input type="text"/>  DAY | <input type="text"/> : <input type="text"/> |

|                            |                          |
|----------------------------|--------------------------|
| Protocol Number: KY2020-29 | <b>Other Examination</b> |
| Center Number  __   __     |                          |

Subject Screening Number |\_\_| |\_\_| |\_\_| |\_\_| |\_\_|

**Is there any other examination to record?**       <sub>0</sub> **NO**       <sub>1</sub> **YES, please fill in the table below.**

| Other Examinations |                                                            |        |      |                                       |                                       |                                         |       |
|--------------------|------------------------------------------------------------|--------|------|---------------------------------------|---------------------------------------|-----------------------------------------|-------|
| Item               | Date of sample or examine                                  | Result | Unit | Result Interpretation                 |                                       |                                         | Notes |
|                    |                                                            |        |      | 1=Normal                              | 2=Abnormal, No Clinical significance  | 3=Abnormal, with Clinically significant |       |
|                    | __   __   __   __   YEAR __   __   MONT<br>H __   __   DAY |        |      | <input type="checkbox"/> <sub>1</sub> | <input type="checkbox"/> <sub>2</sub> | <input type="checkbox"/> <sub>3</sub>   |       |
|                    | __   __   __   __   YEAR __   __   MONT<br>H __   __   DAY |        |      | <input type="checkbox"/> <sub>1</sub> | <input type="checkbox"/> <sub>2</sub> | <input type="checkbox"/> <sub>3</sub>   |       |
|                    | __   __   __   __   YEAR __   __   MONT<br>H __   __   DAY |        |      | <input type="checkbox"/> <sub>1</sub> | <input type="checkbox"/> <sub>2</sub> | <input type="checkbox"/> <sub>3</sub>   |       |
|                    | __   __   __   __   YEAR __   __   MONT<br>H __   __   DAY |        |      | <input type="checkbox"/> <sub>1</sub> | <input type="checkbox"/> <sub>2</sub> | <input type="checkbox"/> <sub>3</sub>   |       |
|                    | __   __   __   __   YEAR __   __   MONT<br>H __   __   DAY |        |      | <input type="checkbox"/> <sub>1</sub> | <input type="checkbox"/> <sub>2</sub> | <input type="checkbox"/> <sub>3</sub>   |       |
|                    | __   __   __   __   YEAR __   __   MONT<br>H __   __   DAY |        |      | <input type="checkbox"/> <sub>1</sub> | <input type="checkbox"/> <sub>2</sub> | <input type="checkbox"/> <sub>3</sub>   |       |

|                                                                                     |                      |
|-------------------------------------------------------------------------------------|----------------------|
| Protocol Number: KY2020-29                                                          | <b>Study Summary</b> |
| Center Number [ ] [ ]      Subject Screening Number [ ] [ ] [ ] [ ] [ ] [ ] [ ] [ ] |                      |

|                      |
|----------------------|
| <b>Study Summary</b> |
|----------------------|

Whether the subject finished the study according to the protocol?

- YES, Finish Date: [ ] [ ] [ ] [ ] |YEAR| [ ] [ ] |MONTH| [ ] [ ] |DAY
- NO, End Date: [ ] [ ] [ ] [ ] |YEAR| [ ] [ ] |MONTH| [ ] [ ] |DAY

If the patient exit ahead of schedule, please choose the most important reason (One-Choice) :

- Disease progression occurred during the study and changes in treatment were required after comprehensive assessment by the investigators.
- Adverse events lead to an exacerbation of the disease
- The subject is reluctant to continue using the study drug.
- Pregnancy
- Loss to follow-up
- Death
- Subject withdraws the Informed Consent
- Study suspension
- Other, please describe: \_\_\_\_\_

\_\_\_\_\_

Notes (Please record other matter which needs additional clarification) :

\_\_\_\_\_

\_\_\_\_\_

\_\_\_\_\_



|                                                                                     |                        |
|-------------------------------------------------------------------------------------|------------------------|
| Protocol Number: KY2020-29                                                          | <b>Hospitalization</b> |
| Center Number [ ] [ ]      Subject Screening Number [ ] [ ] [ ] [ ] [ ] [ ] [ ] [ ] |                        |

| <b>Information on hospitalization</b>                                                                                             |
|-----------------------------------------------------------------------------------------------------------------------------------|
| Was the subject hospitalized with 2019-nCov respiratory infection? <input type="checkbox"/> _0 NO <input type="checkbox"/> _1 YES |
| If Yes, date of admission: [ ] [ ] [ ] [ ]   YEAR   [ ] [ ]   MONTH   [ ] [ ]   DAY                                               |
| Be discharged from hospital at the end of the study or not? <input type="checkbox"/> _0 NO <input type="checkbox"/> _1 YES        |
| If yes, discharge date : [ ] [ ] [ ] [ ]   YEAR   [ ] [ ]   MONTH   [ ] [ ]   DAY                                                 |

|                            |                                                  |              |
|----------------------------|--------------------------------------------------|--------------|
| Protocol Number: KY2020-29 |                                                  | <b>Death</b> |
| Center Number [ ] [ ]      | Subject Screening Number [ ] [ ] [ ] [ ] [ ] [ ] |              |

| Death                  |                                                                                                                                                       |
|------------------------|-------------------------------------------------------------------------------------------------------------------------------------------------------|
| Are the subjects dead? | <input type="checkbox"/> _0 NO <input type="checkbox"/> _1 YES, please fill in <input type="checkbox"/> _2 Unkown                                     |
| Date of dath:          | [ ] [ ] [ ] [ ]  YEAR  [ ] [ ]  MONTH  [ ] [ ]  DAY                                                                                                   |
| The cause of death :   | <input type="checkbox"/> _1 Adverse events<br><input type="checkbox"/> _2 Unkown<br><input type="checkbox"/> _3 Other, please describe _____<br>_____ |

|                            |                                 |                      |
|----------------------------|---------------------------------|----------------------|
| Protocol Number: KY2020-29 |                                 | <b>CRF statement</b> |
| Center Number  __          | Subject Screening Number  _____ |                      |

| <b>Investigator Statement</b>                                                                                                                                                                                                                                                                                                              |
|--------------------------------------------------------------------------------------------------------------------------------------------------------------------------------------------------------------------------------------------------------------------------------------------------------------------------------------------|
| <p>I have reviewed and confirmed that all data recorded in this case report form are true, accurate, reliable, complete, and consistent with the original data. All errors or omissions have been corrected or noted.</p> <p><b>Signature of principal investigator:</b> _____</p> <p><b>Date:</b>  __ _ __ _ YEAR __ _ MONTH __ _ DAY</p> |

| <b>CRA Statement</b>                                                                                                                                                                                                                                                         |
|------------------------------------------------------------------------------------------------------------------------------------------------------------------------------------------------------------------------------------------------------------------------------|
| <p>I have checked and confirmed that all the data recorded in this case report form are true, accurate, reliable, complete and correct and consistent with the original data.</p> <p><b>CRA Signature:</b> _____</p> <p><b>Date:</b>  __ _ __ _ YEAR __ _ MONTH __ _ DAY</p> |

|                                                      |                                    |
|------------------------------------------------------|------------------------------------|
| Protocol Number: KY2020-29                           | <b>Attachement<br/>Out of Plan</b> |
| Center Number  __    Subject Screening Number  _____ |                                    |

|                                                                         |                                                             |                    |                                                                                                                                                                                                                                      |
|-------------------------------------------------------------------------|-------------------------------------------------------------|--------------------|--------------------------------------------------------------------------------------------------------------------------------------------------------------------------------------------------------------------------------------|
| <b>Vital Signs</b> <input type="checkbox"/> _0 Unexamined, reason _____ |                                                             |                    |                                                                                                                                                                                                                                      |
| Date                                                                    | _ _ _ _ YEAR _ _ MONTH _ _ DAY                              |                    |                                                                                                                                                                                                                                      |
| Daily maximum temperature                                               | _ _ .  _ _ °C                                               | Measurement method | <input type="checkbox"/> _1 Axilla <input type="checkbox"/> _2 Oral <input type="checkbox"/> _3 Anus <input type="checkbox"/> _4 Ear<br><input type="checkbox"/> _5 Unknown <input type="checkbox"/> _6 Other, please describe _____ |
| Respiratory                                                             | _ _ times/min                                               | Pulse              | _ _ _ times/min                                                                                                                                                                                                                      |
| Blood pressure                                                          | _ _ _ _ / _ _ _ _  mmHg (Systolic/diastolic blood pressure) |                    |                                                                                                                                                                                                                                      |

|                                                                         |                                                             |                    |                                                                                                                                                                                                                                      |
|-------------------------------------------------------------------------|-------------------------------------------------------------|--------------------|--------------------------------------------------------------------------------------------------------------------------------------------------------------------------------------------------------------------------------------|
| <b>Vital Signs</b> <input type="checkbox"/> _0 Unexamined, reason _____ |                                                             |                    |                                                                                                                                                                                                                                      |
| Date                                                                    | _ _ _ _ YEAR _ _ MONTH _ _ DAY                              |                    |                                                                                                                                                                                                                                      |
| Daily maximum temperature                                               | _ _ .  _ _ °C                                               | Measurement method | <input type="checkbox"/> _1 Axilla <input type="checkbox"/> _2 Oral <input type="checkbox"/> _3 Anus <input type="checkbox"/> _4 Ear <input type="checkbox"/> _5 Unknown<br><input type="checkbox"/> _6 Other, please describe _____ |
| Respiratory                                                             | _ _ times/min                                               | Pulse              | _ _ _ times/min                                                                                                                                                                                                                      |
| Blood pressure                                                          | _ _ _ _ / _ _ _ _  mmHg (Systolic/diastolic blood pressure) |                    |                                                                                                                                                                                                                                      |

|                                                                         |                                                             |                    |                                                                                                                                                                                                                                      |
|-------------------------------------------------------------------------|-------------------------------------------------------------|--------------------|--------------------------------------------------------------------------------------------------------------------------------------------------------------------------------------------------------------------------------------|
| <b>Vital Signs</b> <input type="checkbox"/> _0 Unexamined, reason _____ |                                                             |                    |                                                                                                                                                                                                                                      |
| Date                                                                    | _ _ _ _ YEAR _ _ MONTH _ _ DAY                              |                    |                                                                                                                                                                                                                                      |
| Daily maximum temperature                                               | _ _ .  _ _ °C                                               | Measurement method | <input type="checkbox"/> _1 Axilla <input type="checkbox"/> _2 Oral <input type="checkbox"/> _3 Anus <input type="checkbox"/> _4 Ear <input type="checkbox"/> _5 Unknown<br><input type="checkbox"/> _6 Other, please describe _____ |
| Respiratory                                                             | _ _ times/min                                               | Pulse              | _ _ _ times/min                                                                                                                                                                                                                      |
| Blood pressure                                                          | _ _ _ _ / _ _ _ _  mmHg (Systolic/diastolic blood pressure) |                    |                                                                                                                                                                                                                                      |

|                                                                         |                                                             |                    |                                                                                                                                                                                                                                      |
|-------------------------------------------------------------------------|-------------------------------------------------------------|--------------------|--------------------------------------------------------------------------------------------------------------------------------------------------------------------------------------------------------------------------------------|
| <b>Vital Signs</b> <input type="checkbox"/> _0 Unexamined, reason _____ |                                                             |                    |                                                                                                                                                                                                                                      |
| Date                                                                    | _ _ _ _ YEAR _ _ MONTH _ _ DAY                              |                    |                                                                                                                                                                                                                                      |
| Daily maximum temperature                                               | _ _ .  _ _ °C                                               | Measurement method | <input type="checkbox"/> _1 Axilla <input type="checkbox"/> _2 Oral <input type="checkbox"/> _3 Anus <input type="checkbox"/> _4 Ear <input type="checkbox"/> _5 Unknown<br><input type="checkbox"/> _6 Other, please describe _____ |
| Respiratory                                                             | _ _ times/min                                               | Pulse              | _ _ _ times/min                                                                                                                                                                                                                      |
| Blood pressure                                                          | _ _ _ _ / _ _ _ _  mmHg (Systolic/diastolic blood pressure) |                    |                                                                                                                                                                                                                                      |

| <b>physical examination</b> <input type="checkbox"/> Unexamined, reason: _____ |                                                                                                                |                            |                            |                            |                              |
|--------------------------------------------------------------------------------|----------------------------------------------------------------------------------------------------------------|----------------------------|----------------------------|----------------------------|------------------------------|
| Date                                                                           | _ _ _ _ YEAR _ _ MONTH _ _ DAY                                                                                 |                            |                            |                            |                              |
| Inspection Part                                                                | Result                                                                                                         |                            |                            |                            | If abnormal, please describe |
|                                                                                | 1= Normal<br>2= Abnormal, No Clinical significance<br>3= Abnormal, with Clinically significant<br>0=Unexamined |                            |                            |                            |                              |
| General appearance                                                             | <input type="checkbox"/> 1                                                                                     | <input type="checkbox"/> 2 | <input type="checkbox"/> 3 | <input type="checkbox"/> 0 |                              |
| Head                                                                           | <input type="checkbox"/> 1                                                                                     | <input type="checkbox"/> 2 | <input type="checkbox"/> 3 | <input type="checkbox"/> 0 |                              |
| Eyes                                                                           | <input type="checkbox"/> 1                                                                                     | <input type="checkbox"/> 2 | <input type="checkbox"/> 3 | <input type="checkbox"/> 0 |                              |
| Nose                                                                           | <input type="checkbox"/> 1                                                                                     | <input type="checkbox"/> 2 | <input type="checkbox"/> 3 | <input type="checkbox"/> 0 |                              |
| Larynx                                                                         | <input type="checkbox"/> 1                                                                                     | <input type="checkbox"/> 2 | <input type="checkbox"/> 3 | <input type="checkbox"/> 0 |                              |
| Neck and thyroid                                                               | <input type="checkbox"/> 1                                                                                     | <input type="checkbox"/> 2 | <input type="checkbox"/> 3 | <input type="checkbox"/> 0 |                              |
| Skin                                                                           | <input type="checkbox"/> 1                                                                                     | <input type="checkbox"/> 2 | <input type="checkbox"/> 3 | <input type="checkbox"/> 0 |                              |
| Cardiovascular system                                                          | <input type="checkbox"/> 1                                                                                     | <input type="checkbox"/> 2 | <input type="checkbox"/> 3 | <input type="checkbox"/> 0 |                              |
| Chest and lungs                                                                | <input type="checkbox"/> 1                                                                                     | <input type="checkbox"/> 2 | <input type="checkbox"/> 3 | <input type="checkbox"/> 0 |                              |
| Abdomen                                                                        | <input type="checkbox"/> 1                                                                                     | <input type="checkbox"/> 2 | <input type="checkbox"/> 3 | <input type="checkbox"/> 0 |                              |
| Nervous system                                                                 | <input type="checkbox"/> 1                                                                                     | <input type="checkbox"/> 2 | <input type="checkbox"/> 3 | <input type="checkbox"/> 0 |                              |
| Musculoskeletal system                                                         | <input type="checkbox"/> 1                                                                                     | <input type="checkbox"/> 2 | <input type="checkbox"/> 3 | <input type="checkbox"/> 0 |                              |
| Lymphatic system                                                               | <input type="checkbox"/> 1                                                                                     | <input type="checkbox"/> 2 | <input type="checkbox"/> 3 | <input type="checkbox"/> 0 |                              |

|                                                                                     |                                    |
|-------------------------------------------------------------------------------------|------------------------------------|
| Protocol Number: KY2020-29                                                          | <b>Attachement<br/>Out of Plan</b> |
| Center Number [ ] [ ]      Subject Screening Number [ ] [ ] [ ] [ ] [ ] [ ] [ ] [ ] |                                    |

|                                                                                                                                                              |
|--------------------------------------------------------------------------------------------------------------------------------------------------------------|
| <b>Respiratory symptoms</b> <input type="checkbox"/> Unexamined, reason _____                                                                                |
| Date: [ ] [ ] [ ] [ ]  YEAR  [ ] [ ]  MONTH  [ ] [ ]  DAY                                                                                                    |
| Whether the subject has respiratory symptoms or not: <input type="checkbox"/> NO <input type="checkbox"/> NO, please describe: _____                         |
| Result: <input type="checkbox"/> Normal <input type="checkbox"/> Abnormal, No Clinical significance <input type="checkbox"/> Abnormal Significant clinically |

|                                                                                                                                                              |
|--------------------------------------------------------------------------------------------------------------------------------------------------------------|
| <b>Respiratory symptoms</b> <input type="checkbox"/> Unexamined, reason _____                                                                                |
| Date: [ ] [ ] [ ] [ ]  YEAR  [ ] [ ]  MONTH  [ ] [ ]  DAY                                                                                                    |
| Whether the subject has respiratory symptoms or not: <input type="checkbox"/> NO <input type="checkbox"/> NO, please describe: _____                         |
| Result: <input type="checkbox"/> Normal <input type="checkbox"/> Abnormal, No Clinical significance <input type="checkbox"/> Abnormal Significant clinically |

|                                                                                                                                                              |
|--------------------------------------------------------------------------------------------------------------------------------------------------------------|
| <b>Respiratory symptoms</b> <input type="checkbox"/> Unexamined, reason _____                                                                                |
| Date: [ ] [ ] [ ] [ ]  YEAR  [ ] [ ]  MONTH  [ ] [ ]  DAY                                                                                                    |
| Whether the subject has respiratory symptoms or not: <input type="checkbox"/> NO <input type="checkbox"/> NO, please describe: _____                         |
| Result: <input type="checkbox"/> Normal <input type="checkbox"/> Abnormal, No Clinical significance <input type="checkbox"/> Abnormal Significant clinically |

|                                                                                                                                                              |
|--------------------------------------------------------------------------------------------------------------------------------------------------------------|
| <b>Respiratory symptoms</b> <input type="checkbox"/> Unexamined, reason _____                                                                                |
| Date: [ ] [ ] [ ] [ ]  YEAR  [ ] [ ]  MONTH  [ ] [ ]  DAY                                                                                                    |
| Whether the subject has respiratory symptoms or not: <input type="checkbox"/> NO <input type="checkbox"/> NO, please describe: _____                         |
| Result: <input type="checkbox"/> Normal <input type="checkbox"/> Abnormal, No Clinical significance <input type="checkbox"/> Abnormal Significant clinically |

|                                                                                                                                                              |
|--------------------------------------------------------------------------------------------------------------------------------------------------------------|
| <b>Respiratory symptoms</b> <input type="checkbox"/> Unexamined, reason _____                                                                                |
| Date: [ ] [ ] [ ] [ ]  YEAR  [ ] [ ]  MONTH  [ ] [ ]  DAY                                                                                                    |
| Whether the subject has respiratory symptoms or not: <input type="checkbox"/> NO <input type="checkbox"/> NO, please describe: _____                         |
| Result: <input type="checkbox"/> Normal <input type="checkbox"/> Abnormal, No Clinical significance <input type="checkbox"/> Abnormal Significant clinically |

|                                                                                                                                                              |
|--------------------------------------------------------------------------------------------------------------------------------------------------------------|
| <b>Respiratory symptoms</b> <input type="checkbox"/> Unexamined, reason _____                                                                                |
| Date: [ ] [ ] [ ] [ ]  YEAR  [ ] [ ]  MONTH  [ ] [ ]  DAY                                                                                                    |
| Whether the subject has respiratory symptoms or not: <input type="checkbox"/> NO <input type="checkbox"/> NO, please describe: _____                         |
| Result: <input type="checkbox"/> Normal <input type="checkbox"/> Abnormal, No Clinical significance <input type="checkbox"/> Abnormal Significant clinically |

|                            |                                      |                                    |
|----------------------------|--------------------------------------|------------------------------------|
| Protocol Number: KY2020-29 |                                      | <b>Attachement<br/>Out of Plan</b> |
| Center Number  __ _        | Subject Screening Number  __ _ _ _ _ |                                    |

| <b>Blood Count</b> <input type="checkbox"/> Unexamined, reason _____ |                |                                                                                                              |                                       |                                       |                                       |                                       |
|----------------------------------------------------------------------|----------------|--------------------------------------------------------------------------------------------------------------|---------------------------------------|---------------------------------------|---------------------------------------|---------------------------------------|
| Date:  __ _ _ _ YEAR __ _ MONTH __ _ DAY                             |                |                                                                                                              |                                       | Normal range Number:  __ _ _ _        |                                       |                                       |
| Item                                                                 | Result         |                                                                                                              | Result Interpretation                 |                                       |                                       | Unexamined                            |
|                                                                      | Measured Value | Unit                                                                                                         | Normal                                | Abnormal                              |                                       |                                       |
|                                                                      |                |                                                                                                              |                                       | No Clinical significance              | Significant clinically                |                                       |
| Red Blood Cell (RBC)                                                 |                | <input type="checkbox"/> <sub>1</sub> 10 <sup>12</sup> /L <input type="checkbox"/> <sub>2</sub> Other: _____ | <input type="checkbox"/> <sub>1</sub> | <input type="checkbox"/> <sub>2</sub> | <input type="checkbox"/> <sub>3</sub> | <input type="checkbox"/> <sub>0</sub> |
| White Blood Cell                                                     |                | <input type="checkbox"/> <sub>1</sub> 10 <sup>9</sup> /L <input type="checkbox"/> <sub>2</sub> Other: _____  | <input type="checkbox"/> <sub>1</sub> | <input type="checkbox"/> <sub>2</sub> | <input type="checkbox"/> <sub>3</sub> | <input type="checkbox"/> <sub>0</sub> |
| Hemoglobin (Hb)                                                      |                | <input type="checkbox"/> <sub>1</sub> g/L <input type="checkbox"/> <sub>2</sub> Other: _____                 | <input type="checkbox"/> <sub>1</sub> | <input type="checkbox"/> <sub>2</sub> | <input type="checkbox"/> <sub>3</sub> | <input type="checkbox"/> <sub>0</sub> |
| Platelet (PLT)                                                       |                | <input type="checkbox"/> <sub>1</sub> 10 <sup>9</sup> /L <input type="checkbox"/> <sub>2</sub> Other: _____  | <input type="checkbox"/> <sub>1</sub> | <input type="checkbox"/> <sub>2</sub> | <input type="checkbox"/> <sub>3</sub> | <input type="checkbox"/> <sub>0</sub> |
| Neutrophil (ANC)                                                     |                | <input type="checkbox"/> <sub>1</sub> 10 <sup>9</sup> /L <input type="checkbox"/> <sub>2</sub> Other: _____  | <input type="checkbox"/> <sub>1</sub> | <input type="checkbox"/> <sub>2</sub> | <input type="checkbox"/> <sub>3</sub> | <input type="checkbox"/> <sub>0</sub> |
| Lymphocyte (LY)                                                      |                | <input type="checkbox"/> <sub>1</sub> 10 <sup>9</sup> /L <input type="checkbox"/> <sub>2</sub> Other: _____  | <input type="checkbox"/> <sub>1</sub> | <input type="checkbox"/> <sub>2</sub> | <input type="checkbox"/> <sub>3</sub> | <input type="checkbox"/> <sub>0</sub> |
| Monocyte (MO)                                                        |                | <input type="checkbox"/> <sub>1</sub> 10 <sup>9</sup> /L <input type="checkbox"/> <sub>2</sub> Other: _____  | <input type="checkbox"/> <sub>1</sub> | <input type="checkbox"/> <sub>2</sub> | <input type="checkbox"/> <sub>3</sub> | <input type="checkbox"/> <sub>0</sub> |
| Eosinophil (EO)                                                      |                | <input type="checkbox"/> <sub>1</sub> 10 <sup>9</sup> /L <input type="checkbox"/> <sub>2</sub> Other: _____  | <input type="checkbox"/> <sub>1</sub> | <input type="checkbox"/> <sub>2</sub> | <input type="checkbox"/> <sub>3</sub> | <input type="checkbox"/> <sub>0</sub> |
| Basophil (BA)                                                        |                | <input type="checkbox"/> <sub>1</sub> 10 <sup>9</sup> /L <input type="checkbox"/> <sub>2</sub> Other: _____  | <input type="checkbox"/> <sub>1</sub> | <input type="checkbox"/> <sub>2</sub> | <input type="checkbox"/> <sub>3</sub> | <input type="checkbox"/> <sub>0</sub> |

| <b>Blood Count</b> <input type="checkbox"/> Unexamined, reason _____ |                |                                                                                                              |                                       |                                       |                                       |                                       |
|----------------------------------------------------------------------|----------------|--------------------------------------------------------------------------------------------------------------|---------------------------------------|---------------------------------------|---------------------------------------|---------------------------------------|
| Date:  __ _ _ _ YEAR __ _ MONTH __ _ DAY                             |                |                                                                                                              |                                       | Normal range Number:  __ _ _ _        |                                       |                                       |
| Item                                                                 | Result         |                                                                                                              | Result Interpretation                 |                                       |                                       | Unexamined                            |
|                                                                      | Measured Value | Unit                                                                                                         | Normal                                | Abnormal                              |                                       |                                       |
|                                                                      |                |                                                                                                              |                                       | No Clinical significance              | Significant clinically                |                                       |
| Red Blood Cell (RBC)                                                 |                | <input type="checkbox"/> <sub>1</sub> 10 <sup>12</sup> /L <input type="checkbox"/> <sub>2</sub> Other: _____ | <input type="checkbox"/> <sub>1</sub> | <input type="checkbox"/> <sub>2</sub> | <input type="checkbox"/> <sub>3</sub> | <input type="checkbox"/> <sub>0</sub> |
| White Blood Cell                                                     |                | <input type="checkbox"/> <sub>1</sub> 10 <sup>9</sup> /L <input type="checkbox"/> <sub>2</sub> Other: _____  | <input type="checkbox"/> <sub>1</sub> | <input type="checkbox"/> <sub>2</sub> | <input type="checkbox"/> <sub>3</sub> | <input type="checkbox"/> <sub>0</sub> |
| Hemoglobin (Hb)                                                      |                | <input type="checkbox"/> <sub>1</sub> g/L <input type="checkbox"/> <sub>2</sub> Other: _____                 | <input type="checkbox"/> <sub>1</sub> | <input type="checkbox"/> <sub>2</sub> | <input type="checkbox"/> <sub>3</sub> | <input type="checkbox"/> <sub>0</sub> |
| Platelet (PLT)                                                       |                | <input type="checkbox"/> <sub>1</sub> 10 <sup>9</sup> /L <input type="checkbox"/> <sub>2</sub> Other: _____  | <input type="checkbox"/> <sub>1</sub> | <input type="checkbox"/> <sub>2</sub> | <input type="checkbox"/> <sub>3</sub> | <input type="checkbox"/> <sub>0</sub> |
| Neutrophil (ANC)                                                     |                | <input type="checkbox"/> <sub>1</sub> 10 <sup>9</sup> /L <input type="checkbox"/> <sub>2</sub> Other: _____  | <input type="checkbox"/> <sub>1</sub> | <input type="checkbox"/> <sub>2</sub> | <input type="checkbox"/> <sub>3</sub> | <input type="checkbox"/> <sub>0</sub> |
| Lymphocyte (LY)                                                      |                | <input type="checkbox"/> <sub>1</sub> 10 <sup>9</sup> /L <input type="checkbox"/> <sub>2</sub> Other: _____  | <input type="checkbox"/> <sub>1</sub> | <input type="checkbox"/> <sub>2</sub> | <input type="checkbox"/> <sub>3</sub> | <input type="checkbox"/> <sub>0</sub> |
| Monocyte (MO)                                                        |                | <input type="checkbox"/> <sub>1</sub> 10 <sup>9</sup> /L <input type="checkbox"/> <sub>2</sub> Other: _____  | <input type="checkbox"/> <sub>1</sub> | <input type="checkbox"/> <sub>2</sub> | <input type="checkbox"/> <sub>3</sub> | <input type="checkbox"/> <sub>0</sub> |
| Eosinophil (EO)                                                      |                | <input type="checkbox"/> <sub>1</sub> 10 <sup>9</sup> /L <input type="checkbox"/> <sub>2</sub> Other: _____  | <input type="checkbox"/> <sub>1</sub> | <input type="checkbox"/> <sub>2</sub> | <input type="checkbox"/> <sub>3</sub> | <input type="checkbox"/> <sub>0</sub> |
| Basophil (BA)                                                        |                | <input type="checkbox"/> <sub>1</sub> 10 <sup>9</sup> /L <input type="checkbox"/> <sub>2</sub> Other: _____  | <input type="checkbox"/> <sub>1</sub> | <input type="checkbox"/> <sub>2</sub> | <input type="checkbox"/> <sub>3</sub> | <input type="checkbox"/> <sub>0</sub> |

|                                                   |                                    |
|---------------------------------------------------|------------------------------------|
| Protocol Number: KY2020-29                        | <b>Attachement<br/>Out of Plan</b> |
| Center Number  __    Subject Screening Number  __ |                                    |

| Blood Biochemistry <input type="checkbox"/> Unexamined, reason _____ |                                 |                                       |                                                                            |                                                                            |                          |            |
|----------------------------------------------------------------------|---------------------------------|---------------------------------------|----------------------------------------------------------------------------|----------------------------------------------------------------------------|--------------------------|------------|
| Date  __        YEAR  __    MONTH  __    DAY                         |                                 |                                       | Normal range Number:  __                                                   |                                                                            |                          |            |
| Item                                                                 | Result                          |                                       | Result Interpretation                                                      |                                                                            |                          | Unexamined |
|                                                                      | Measured Value                  | Unit                                  | Normal                                                                     | Abnormal                                                                   |                          |            |
|                                                                      |                                 |                                       |                                                                            | No Clinical significance                                                   | Significant clinically   |            |
| Glutamic-pyruvic transaminase (ALT)                                  | <input type="checkbox"/> U/L    | <input type="checkbox"/> Other: _____ | <input type="checkbox"/> <input type="checkbox"/> <input type="checkbox"/> | <input type="checkbox"/> <input type="checkbox"/> <input type="checkbox"/> | <input type="checkbox"/> |            |
| Glutamic-oxalacetic transaminase (AST)                               | <input type="checkbox"/> U/L    | <input type="checkbox"/> Other: _____ | <input type="checkbox"/> <input type="checkbox"/> <input type="checkbox"/> | <input type="checkbox"/> <input type="checkbox"/> <input type="checkbox"/> | <input type="checkbox"/> |            |
| Total Bilirubin (TBIL)                                               | <input type="checkbox"/> µmol/L | <input type="checkbox"/> Other: _____ | <input type="checkbox"/> <input type="checkbox"/> <input type="checkbox"/> | <input type="checkbox"/> <input type="checkbox"/> <input type="checkbox"/> | <input type="checkbox"/> |            |
| Albumin (ALB)                                                        | <input type="checkbox"/> g/L    | <input type="checkbox"/> Other: _____ | <input type="checkbox"/> <input type="checkbox"/> <input type="checkbox"/> | <input type="checkbox"/> <input type="checkbox"/> <input type="checkbox"/> | <input type="checkbox"/> |            |
| γ- glutamyl transpeptidase (GGT)                                     | <input type="checkbox"/> U/L    | <input type="checkbox"/> Other: _____ | <input type="checkbox"/> <input type="checkbox"/> <input type="checkbox"/> | <input type="checkbox"/> <input type="checkbox"/> <input type="checkbox"/> | <input type="checkbox"/> |            |
| Lactic dehydrogenase (LDH)                                           | <input type="checkbox"/> U/L    | <input type="checkbox"/> Other: _____ | <input type="checkbox"/> <input type="checkbox"/> <input type="checkbox"/> | <input type="checkbox"/> <input type="checkbox"/> <input type="checkbox"/> | <input type="checkbox"/> |            |
| Creatine kinase (CK)                                                 | <input type="checkbox"/> U/L    | <input type="checkbox"/> Other: _____ | <input type="checkbox"/> <input type="checkbox"/> <input type="checkbox"/> | <input type="checkbox"/> <input type="checkbox"/> <input type="checkbox"/> | <input type="checkbox"/> |            |
| Creatine kinase isoenzyme (CK-MB)                                    | <input type="checkbox"/> U/L    | <input type="checkbox"/> Other: _____ | <input type="checkbox"/> <input type="checkbox"/> <input type="checkbox"/> | <input type="checkbox"/> <input type="checkbox"/> <input type="checkbox"/> | <input type="checkbox"/> |            |
| Blood urea nitrogen (BUN)                                            | <input type="checkbox"/> mmol/L | <input type="checkbox"/> Other: _____ | <input type="checkbox"/> <input type="checkbox"/> <input type="checkbox"/> | <input type="checkbox"/> <input type="checkbox"/> <input type="checkbox"/> | <input type="checkbox"/> |            |
| Urea (Urea)                                                          | <input type="checkbox"/> mmol/L | <input type="checkbox"/> Other: _____ | <input type="checkbox"/> <input type="checkbox"/> <input type="checkbox"/> | <input type="checkbox"/> <input type="checkbox"/> <input type="checkbox"/> | <input type="checkbox"/> |            |
| Serum creatinine (CR)                                                | <input type="checkbox"/> µmol/L | <input type="checkbox"/> Other: _____ | <input type="checkbox"/> <input type="checkbox"/> <input type="checkbox"/> | <input type="checkbox"/> <input type="checkbox"/> <input type="checkbox"/> | <input type="checkbox"/> |            |



|                            |                              |                                    |
|----------------------------|------------------------------|------------------------------------|
| Protocol Number: KY2020-29 |                              | <b>Attachement<br/>Out of Plan</b> |
| Center Number  __          | Subject Screening Number  __ |                                    |

| <b>Urine Test</b> <input type="checkbox"/> Unexamined, reason _____ |                                           |                                      |                            |                                         |                            |                            |
|---------------------------------------------------------------------|-------------------------------------------|--------------------------------------|----------------------------|-----------------------------------------|----------------------------|----------------------------|
| Date:  __   __   __   __  YEAR  __   __  MONTH  __   __  DAY        |                                           |                                      |                            | Normal range Number:  __   __   __   __ |                            |                            |
| Item                                                                | Result                                    |                                      | Result Interpretation      |                                         |                            | Unexamined                 |
|                                                                     | Measured Value                            | Unit                                 | Normal                     | Abnormal                                |                            |                            |
|                                                                     |                                           |                                      |                            | No Clinical significance                | Significant clinically     |                            |
| Urine Protein                                                       | <input type="checkbox"/> Not Applicable   | <input type="checkbox"/> Other: ____ | <input type="checkbox"/> 1 | <input type="checkbox"/> 2              | <input type="checkbox"/> 3 | <input type="checkbox"/> 0 |
| Urine Glucose                                                       | <input type="checkbox"/> 1 mmol/L         | <input type="checkbox"/> Other: ____ | <input type="checkbox"/> 1 | <input type="checkbox"/> 2              | <input type="checkbox"/> 3 | <input type="checkbox"/> 0 |
| Urine PH value                                                      | <input type="checkbox"/> 1 Not Applicable | <input type="checkbox"/> Other: ____ | <input type="checkbox"/> 1 | <input type="checkbox"/> 2              | <input type="checkbox"/> 3 | <input type="checkbox"/> 0 |
| Urine Erythrocyte                                                   | <input type="checkbox"/> Not Applicable   | <input type="checkbox"/> Other: ____ | <input type="checkbox"/> 1 | <input type="checkbox"/> 2              | <input type="checkbox"/> 3 | <input type="checkbox"/> 0 |
| Urine Leukocyte                                                     | <input type="checkbox"/> Not Applicable   | <input type="checkbox"/> Other: ____ | <input type="checkbox"/> 1 | <input type="checkbox"/> 2              | <input type="checkbox"/> 3 | <input type="checkbox"/> 0 |
| Urine Ketone                                                        | <input type="checkbox"/> Not Applicable   | <input type="checkbox"/> Other: ____ | <input type="checkbox"/> 1 | <input type="checkbox"/> 2              | <input type="checkbox"/> 3 | <input type="checkbox"/> 0 |

| <b>Urine Test</b> <input type="checkbox"/> Unexamined, reason _____ |                                           |                                      |                            |                                         |                            |                            |
|---------------------------------------------------------------------|-------------------------------------------|--------------------------------------|----------------------------|-----------------------------------------|----------------------------|----------------------------|
| Date:  __   __   __   __  YEAR  __   __  MONTH  __   __  DAY        |                                           |                                      |                            | Normal range Number:  __   __   __   __ |                            |                            |
| Item                                                                | Result                                    |                                      | Result Interpretation      |                                         |                            | Unexamined                 |
|                                                                     | Measured Value                            | Unit                                 | Normal                     | Abnormal                                |                            |                            |
|                                                                     |                                           |                                      |                            | No Clinical significance                | Significant clinically     |                            |
| Urine Protein                                                       | <input type="checkbox"/> Not Applicable   | <input type="checkbox"/> Other: ____ | <input type="checkbox"/> 1 | <input type="checkbox"/> 2              | <input type="checkbox"/> 3 | <input type="checkbox"/> 0 |
| Urine Glucose                                                       | <input type="checkbox"/> 1 mmol/L         | <input type="checkbox"/> Other: ____ | <input type="checkbox"/> 1 | <input type="checkbox"/> 2              | <input type="checkbox"/> 3 | <input type="checkbox"/> 0 |
| Urine PH value                                                      | <input type="checkbox"/> 1 Not Applicable | <input type="checkbox"/> Other: ____ | <input type="checkbox"/> 1 | <input type="checkbox"/> 2              | <input type="checkbox"/> 3 | <input type="checkbox"/> 0 |
| Urine Erythrocyte                                                   | <input type="checkbox"/> Not Applicable   | <input type="checkbox"/> Other: ____ | <input type="checkbox"/> 1 | <input type="checkbox"/> 2              | <input type="checkbox"/> 3 | <input type="checkbox"/> 0 |
| Urine Leukocyte                                                     | <input type="checkbox"/> Not Applicable   | <input type="checkbox"/> Other: ____ | <input type="checkbox"/> 1 | <input type="checkbox"/> 2              | <input type="checkbox"/> 3 | <input type="checkbox"/> 0 |
| Urine Ketone                                                        | <input type="checkbox"/> Not Applicable   | <input type="checkbox"/> Other: ____ | <input type="checkbox"/> 1 | <input type="checkbox"/> 2              | <input type="checkbox"/> 3 | <input type="checkbox"/> 0 |

|                            |                                      |                                    |
|----------------------------|--------------------------------------|------------------------------------|
| Protocol Number: KY2020-29 |                                      | <b>Attachement<br/>Out of Plan</b> |
| Center Number  __ _        | Subject Screening Number  __ _ _ _ _ |                                    |

| <b>Coagulation Function</b> <input type="checkbox"/> Unexamined, reason _____ |                |                                                                                                         |                                       |                                       |                                       |                                       |
|-------------------------------------------------------------------------------|----------------|---------------------------------------------------------------------------------------------------------|---------------------------------------|---------------------------------------|---------------------------------------|---------------------------------------|
| Date:  __ _ _ _ YEAR __ _ MONTH __ _ DAY                                      |                |                                                                                                         | Normal range Number:  __ _ _ _        |                                       |                                       |                                       |
| Item                                                                          | Result         |                                                                                                         | Result Interpretation                 |                                       |                                       | Unexamined                            |
|                                                                               | Measured Value | Unit                                                                                                    | Normal                                | Abnormal                              |                                       |                                       |
|                                                                               |                |                                                                                                         |                                       | No Clinical significance              | Significant clinically                |                                       |
| ProthrombinTime (PT)                                                          |                | <input type="checkbox"/> <sub>1</sub> S <input type="checkbox"/> <sub>2</sub> Other: _____              | <input type="checkbox"/> <sub>1</sub> | <input type="checkbox"/> <sub>2</sub> | <input type="checkbox"/> <sub>3</sub> | <input type="checkbox"/> <sub>0</sub> |
| Activated Partial Thromboplastin Time (APTT)                                  |                | <input type="checkbox"/> <sub>1</sub> S <input type="checkbox"/> <sub>2</sub> Other: _____              | <input type="checkbox"/> <sub>1</sub> | <input type="checkbox"/> <sub>2</sub> | <input type="checkbox"/> <sub>3</sub> | <input type="checkbox"/> <sub>0</sub> |
| Thrombin Time (TT)                                                            |                | <input type="checkbox"/> <sub>1</sub> S <input type="checkbox"/> <sub>2</sub> Other: _____              | <input type="checkbox"/> <sub>1</sub> | <input type="checkbox"/> <sub>2</sub> | <input type="checkbox"/> <sub>3</sub> | <input type="checkbox"/> <sub>0</sub> |
| Fibrinogen (Fbg)                                                              |                | <input type="checkbox"/> <sub>1</sub> g/L <input type="checkbox"/> <sub>2</sub> Other: _____            | <input type="checkbox"/> <sub>1</sub> | <input type="checkbox"/> <sub>2</sub> | <input type="checkbox"/> <sub>3</sub> | <input type="checkbox"/> <sub>0</sub> |
| International Normalized Ratio (INR)                                          |                | <input type="checkbox"/> <sub>1</sub> Not Applicable <input type="checkbox"/> <sub>2</sub> Other: _____ | <input type="checkbox"/> <sub>1</sub> | <input type="checkbox"/> <sub>2</sub> | <input type="checkbox"/> <sub>3</sub> | <input type="checkbox"/> <sub>0</sub> |

| <b>Coagulation Function</b> <input type="checkbox"/> Unexamined, reason _____ |                |                                                                                                         |                                       |                                       |                                       |                                       |
|-------------------------------------------------------------------------------|----------------|---------------------------------------------------------------------------------------------------------|---------------------------------------|---------------------------------------|---------------------------------------|---------------------------------------|
| Date:  __ _ _ _ YEAR __ _ MONTH __ _ DAY                                      |                |                                                                                                         | Normal range Number:  __ _ _ _        |                                       |                                       |                                       |
| Item                                                                          | Result         |                                                                                                         | Result Interpretation                 |                                       |                                       | Unexamined                            |
|                                                                               | Measured Value | Unit                                                                                                    | Normal                                | Abnormal                              |                                       |                                       |
|                                                                               |                |                                                                                                         |                                       | No Clinical significance              | Significant clinically                |                                       |
| ProthrombinTime (PT)                                                          |                | <input type="checkbox"/> <sub>1</sub> S <input type="checkbox"/> <sub>2</sub> Other: _____              | <input type="checkbox"/> <sub>1</sub> | <input type="checkbox"/> <sub>2</sub> | <input type="checkbox"/> <sub>3</sub> | <input type="checkbox"/> <sub>0</sub> |
| Activated Partial Thromboplastin Time (APTT)                                  |                | <input type="checkbox"/> <sub>1</sub> S <input type="checkbox"/> <sub>2</sub> Other: _____              | <input type="checkbox"/> <sub>1</sub> | <input type="checkbox"/> <sub>2</sub> | <input type="checkbox"/> <sub>3</sub> | <input type="checkbox"/> <sub>0</sub> |
| Thrombin Time (TT)                                                            |                | <input type="checkbox"/> <sub>1</sub> S <input type="checkbox"/> <sub>2</sub> Other: _____              | <input type="checkbox"/> <sub>1</sub> | <input type="checkbox"/> <sub>2</sub> | <input type="checkbox"/> <sub>3</sub> | <input type="checkbox"/> <sub>0</sub> |
| Fibrinogen (Fbg)                                                              |                | <input type="checkbox"/> <sub>1</sub> g/L <input type="checkbox"/> <sub>2</sub> Other: _____            | <input type="checkbox"/> <sub>1</sub> | <input type="checkbox"/> <sub>2</sub> | <input type="checkbox"/> <sub>3</sub> | <input type="checkbox"/> <sub>0</sub> |
| International Normalized Ratio (INR)                                          |                | <input type="checkbox"/> <sub>1</sub> Not Applicable <input type="checkbox"/> <sub>2</sub> Other: _____ | <input type="checkbox"/> <sub>1</sub> | <input type="checkbox"/> <sub>2</sub> | <input type="checkbox"/> <sub>3</sub> | <input type="checkbox"/> <sub>0</sub> |

|                                                                                                                                                                                                                           |                                    |
|---------------------------------------------------------------------------------------------------------------------------------------------------------------------------------------------------------------------------|------------------------------------|
| Protocol Number: KY2020-29                                                                                                                                                                                                | <b>Attachement<br/>Out of Plan</b> |
| Center Number <input style="width: 50px; border: none; border-bottom: 1px solid black;" type="text"/>   Subject Screening Number <input style="width: 100px; border: none; border-bottom: 1px solid black;" type="text"/> |                                    |

| <b>C-REACTION PROTEIN (CRP)</b> <input type="checkbox"/> Unexamined, reason _____                                                                                                                                                                                                                                                                                                                                                                                                                                                                                                    |                |                                                                     |                                                                                                              |                            |                            |
|--------------------------------------------------------------------------------------------------------------------------------------------------------------------------------------------------------------------------------------------------------------------------------------------------------------------------------------------------------------------------------------------------------------------------------------------------------------------------------------------------------------------------------------------------------------------------------------|----------------|---------------------------------------------------------------------|--------------------------------------------------------------------------------------------------------------|----------------------------|----------------------------|
| Date: <input style="width: 30px; border: none; border-bottom: 1px solid black;" type="text"/>   <input style="width: 30px; border: none; border-bottom: 1px solid black;" type="text"/>   YEAR   <input style="width: 30px; border: none; border-bottom: 1px solid black;" type="text"/>   <input style="width: 30px; border: none; border-bottom: 1px solid black;" type="text"/>   MONTH   <input style="width: 30px; border: none; border-bottom: 1px solid black;" type="text"/>   <input style="width: 30px; border: none; border-bottom: 1px solid black;" type="text"/>   DAY |                |                                                                     | Normal range Number: <input style="width: 50px; border: none; border-bottom: 1px solid black;" type="text"/> |                            |                            |
| Item                                                                                                                                                                                                                                                                                                                                                                                                                                                                                                                                                                                 | Result         |                                                                     | Result Interpretation                                                                                        |                            |                            |
| C-REACTION PROTEIN<br>(CRP)                                                                                                                                                                                                                                                                                                                                                                                                                                                                                                                                                          | Measured Value | Unit                                                                | Norma<br>l                                                                                                   | Abnormal                   |                            |
|                                                                                                                                                                                                                                                                                                                                                                                                                                                                                                                                                                                      |                | <input type="checkbox"/> mg/L <input type="checkbox"/> Other: _____ |                                                                                                              | <input type="checkbox"/> 1 | <input type="checkbox"/> 2 |

| <b>C-REACTION PROTEIN (CRP)</b> <input type="checkbox"/> Unexamined, reason _____                                                                                                                                                                                                                                                                                                                                                                                                                                                                                                     |                |                                                                     |                                                                                                              |                            |                            |
|---------------------------------------------------------------------------------------------------------------------------------------------------------------------------------------------------------------------------------------------------------------------------------------------------------------------------------------------------------------------------------------------------------------------------------------------------------------------------------------------------------------------------------------------------------------------------------------|----------------|---------------------------------------------------------------------|--------------------------------------------------------------------------------------------------------------|----------------------------|----------------------------|
| Date : <input style="width: 30px; border: none; border-bottom: 1px solid black;" type="text"/>   <input style="width: 30px; border: none; border-bottom: 1px solid black;" type="text"/>   YEAR   <input style="width: 30px; border: none; border-bottom: 1px solid black;" type="text"/>   <input style="width: 30px; border: none; border-bottom: 1px solid black;" type="text"/>   MONTH   <input style="width: 30px; border: none; border-bottom: 1px solid black;" type="text"/>   <input style="width: 30px; border: none; border-bottom: 1px solid black;" type="text"/>   DAY |                |                                                                     | Normal range Number: <input style="width: 50px; border: none; border-bottom: 1px solid black;" type="text"/> |                            |                            |
| Item                                                                                                                                                                                                                                                                                                                                                                                                                                                                                                                                                                                  | Result         |                                                                     | Result Interpretation                                                                                        |                            |                            |
| C-REACTION PROTEIN<br>(CRP)                                                                                                                                                                                                                                                                                                                                                                                                                                                                                                                                                           | Measured Value | Unit                                                                | Norma<br>l                                                                                                   | Abnormal                   |                            |
|                                                                                                                                                                                                                                                                                                                                                                                                                                                                                                                                                                                       |                | <input type="checkbox"/> mg/L <input type="checkbox"/> Other: _____ |                                                                                                              | <input type="checkbox"/> 1 | <input type="checkbox"/> 2 |

| <b>C-REACTION PROTEIN (CRP)</b> <input type="checkbox"/> Unexamined, reason _____                                                                                                                                                                                                                                                                                                                                                                                                                                                                                                     |                |                                                                     |                                                                                                              |                            |                            |
|---------------------------------------------------------------------------------------------------------------------------------------------------------------------------------------------------------------------------------------------------------------------------------------------------------------------------------------------------------------------------------------------------------------------------------------------------------------------------------------------------------------------------------------------------------------------------------------|----------------|---------------------------------------------------------------------|--------------------------------------------------------------------------------------------------------------|----------------------------|----------------------------|
| Date : <input style="width: 30px; border: none; border-bottom: 1px solid black;" type="text"/>   <input style="width: 30px; border: none; border-bottom: 1px solid black;" type="text"/>   YEAR   <input style="width: 30px; border: none; border-bottom: 1px solid black;" type="text"/>   <input style="width: 30px; border: none; border-bottom: 1px solid black;" type="text"/>   MONTH   <input style="width: 30px; border: none; border-bottom: 1px solid black;" type="text"/>   <input style="width: 30px; border: none; border-bottom: 1px solid black;" type="text"/>   DAY |                |                                                                     | Normal range Number: <input style="width: 50px; border: none; border-bottom: 1px solid black;" type="text"/> |                            |                            |
| Item                                                                                                                                                                                                                                                                                                                                                                                                                                                                                                                                                                                  | Result         |                                                                     | Result Interpretation                                                                                        |                            |                            |
| C-REACTION PROTEIN<br>(CRP)                                                                                                                                                                                                                                                                                                                                                                                                                                                                                                                                                           | Measured Value | Unit                                                                | Norma<br>l                                                                                                   | Abnormal                   |                            |
|                                                                                                                                                                                                                                                                                                                                                                                                                                                                                                                                                                                       |                | <input type="checkbox"/> mg/L <input type="checkbox"/> Other: _____ |                                                                                                              | <input type="checkbox"/> 1 | <input type="checkbox"/> 2 |

| <b>C-REACTION PROTEIN (CRP)</b> <input type="checkbox"/> Unexamined, reason _____                                                                                                                                                                                                                                                                                                                                                                                                                                                                                                     |                |                                                                     |                                                                                                              |                            |                            |
|---------------------------------------------------------------------------------------------------------------------------------------------------------------------------------------------------------------------------------------------------------------------------------------------------------------------------------------------------------------------------------------------------------------------------------------------------------------------------------------------------------------------------------------------------------------------------------------|----------------|---------------------------------------------------------------------|--------------------------------------------------------------------------------------------------------------|----------------------------|----------------------------|
| Date : <input style="width: 30px; border: none; border-bottom: 1px solid black;" type="text"/>   <input style="width: 30px; border: none; border-bottom: 1px solid black;" type="text"/>   YEAR   <input style="width: 30px; border: none; border-bottom: 1px solid black;" type="text"/>   <input style="width: 30px; border: none; border-bottom: 1px solid black;" type="text"/>   MONTH   <input style="width: 30px; border: none; border-bottom: 1px solid black;" type="text"/>   <input style="width: 30px; border: none; border-bottom: 1px solid black;" type="text"/>   DAY |                |                                                                     | Normal range Number: <input style="width: 50px; border: none; border-bottom: 1px solid black;" type="text"/> |                            |                            |
| Item                                                                                                                                                                                                                                                                                                                                                                                                                                                                                                                                                                                  | Result         |                                                                     | Result Interpretation                                                                                        |                            |                            |
| C-REACTION PROTEIN<br>(CRP)                                                                                                                                                                                                                                                                                                                                                                                                                                                                                                                                                           | Measured Value | Unit                                                                | Norma<br>l                                                                                                   | Abnormal                   |                            |
|                                                                                                                                                                                                                                                                                                                                                                                                                                                                                                                                                                                       |                | <input type="checkbox"/> mg/L <input type="checkbox"/> Other: _____ |                                                                                                              | <input type="checkbox"/> 1 | <input type="checkbox"/> 2 |

|                                                   |                                    |
|---------------------------------------------------|------------------------------------|
| Protocol Number: KY2020-29                        | <b>Attachement<br/>Out of Plan</b> |
| Center Number  __    Subject Screening Number  __ |                                    |

| <b>Erythrocyte Sedimentation Rate (ESR)</b> <input type="checkbox"/> _0 Unexamined, reason _____ |                |                                                                           |                             |                             |                             |
|--------------------------------------------------------------------------------------------------|----------------|---------------------------------------------------------------------------|-----------------------------|-----------------------------|-----------------------------|
| Date :  __          YEAR         MONTH         DAY                                               |                |                                                                           |                             |                             | Normal range                |
| Number:  __                                                                                      |                |                                                                           |                             |                             |                             |
| Item                                                                                             | Result         |                                                                           | Result Interpretation       |                             |                             |
| Erythrocyte<br>Sedimentation Rate<br><small>(ESR)</small>                                        | Measured Value | Unit                                                                      | Norma<br>l                  | Abnormal                    |                             |
|                                                                                                  |                |                                                                           |                             | No Clinical<br>significance | Significant<br>clinically   |
|                                                                                                  |                | <input type="checkbox"/> _1 mm/h <input type="checkbox"/> _2 Other: _____ | <input type="checkbox"/> _1 | <input type="checkbox"/> _2 | <input type="checkbox"/> _3 |

| <b>Erythrocyte Sedimentation Rate (ESR)</b> <input type="checkbox"/> _0 Unexamined, reason _____ |                |                                                                           |                             |                             |                             |
|--------------------------------------------------------------------------------------------------|----------------|---------------------------------------------------------------------------|-----------------------------|-----------------------------|-----------------------------|
| Date :  __          YEAR         MONTH         DAY                                               |                |                                                                           |                             |                             | Normal range                |
| Number:  __                                                                                      |                |                                                                           |                             |                             |                             |
| Item                                                                                             | Result         |                                                                           | Result Interpretation       |                             |                             |
| Erythrocyte<br>Sedimentation Rate<br><small>(ESR)</small>                                        | Measured Value | Unit                                                                      | Norma<br>l                  | Abnormal                    |                             |
|                                                                                                  |                |                                                                           |                             | No Clinical<br>significance | Significant<br>clinically   |
|                                                                                                  |                | <input type="checkbox"/> _1 mm/h <input type="checkbox"/> _2 Other: _____ | <input type="checkbox"/> _1 | <input type="checkbox"/> _2 | <input type="checkbox"/> _3 |

| <b>Erythrocyte Sedimentation Rate (ESR)</b> <input type="checkbox"/> _0 Unexamined, reason _____ |                |                                                                           |                             |                             |                             |
|--------------------------------------------------------------------------------------------------|----------------|---------------------------------------------------------------------------|-----------------------------|-----------------------------|-----------------------------|
| Date :  __          YEAR         MONTH         DAY                                               |                |                                                                           |                             |                             | Normal range                |
| Number:  __                                                                                      |                |                                                                           |                             |                             |                             |
| Item                                                                                             | Result         |                                                                           | Result Interpretation       |                             |                             |
| Erythrocyte<br>Sedimentation Rate<br><small>(ESR)</small>                                        | Measured Value | Unit                                                                      | Norma<br>l                  | Abnormal                    |                             |
|                                                                                                  |                |                                                                           |                             | No Clinical<br>significance | Significant<br>clinically   |
|                                                                                                  |                | <input type="checkbox"/> _1 mm/h <input type="checkbox"/> _2 Other: _____ | <input type="checkbox"/> _1 | <input type="checkbox"/> _2 | <input type="checkbox"/> _3 |

| <b>Erythrocyte Sedimentation Rate (ESR)</b> <input type="checkbox"/> _0 Unexamined, reason _____ |                |                                                                           |                             |                             |                             |
|--------------------------------------------------------------------------------------------------|----------------|---------------------------------------------------------------------------|-----------------------------|-----------------------------|-----------------------------|
| Date :  __          YEAR         MONTH         DAY                                               |                |                                                                           |                             |                             | Normal range                |
| Number:  __                                                                                      |                |                                                                           |                             |                             |                             |
| Item                                                                                             | Result         |                                                                           | Result Interpretation       |                             |                             |
| Erythrocyte<br>Sedimentation Rate<br><small>(ESR)</small>                                        | Measured Value | Unit                                                                      | Norma<br>l                  | Abnormal                    |                             |
|                                                                                                  |                |                                                                           |                             | No Clinical<br>significance | Significant<br>clinically   |
|                                                                                                  |                | <input type="checkbox"/> _1 mm/h <input type="checkbox"/> _2 Other: _____ | <input type="checkbox"/> _1 | <input type="checkbox"/> _2 | <input type="checkbox"/> _3 |

|                                    |                                    |
|------------------------------------|------------------------------------|
| Protocol Number: KY2020-29         | <b>Attachement<br/>Out of Plan</b> |
| Center Number <input type="text"/> |                                    |

| <b>TNF-<math>\alpha</math></b> <input type="checkbox"/> Unexamined, reason _____                                                                                                     |                |                                  |                                         |                                           |                            |                            |
|--------------------------------------------------------------------------------------------------------------------------------------------------------------------------------------|----------------|----------------------------------|-----------------------------------------|-------------------------------------------|----------------------------|----------------------------|
| Date: <input type="text"/>   <input type="text"/>   <input type="text"/>  YEAR  <input type="text"/>   <input type="text"/>  MONTH  <input type="text"/>   <input type="text"/>  DAY |                |                                  |                                         | Normal range Number: <input type="text"/> |                            |                            |
| Item                                                                                                                                                                                 | Result         |                                  |                                         | Result Interpretation                     |                            |                            |
| TNF- $\alpha$                                                                                                                                                                        | Measured Value | Unit                             |                                         | Normal<br>1                               | Abnormal                   |                            |
|                                                                                                                                                                                      |                | <input type="checkbox"/> 1 pg/mL | <input type="checkbox"/> 2 Other: _____ |                                           | <input type="checkbox"/> 1 | <input type="checkbox"/> 2 |
|                                                                                                                                                                                      |                |                                  |                                         |                                           |                            |                            |

| <b>TNF-<math>\alpha</math></b> <input type="checkbox"/> Unexamined, reason _____                                                                                                     |                |                                  |                                         |                                           |                            |                            |
|--------------------------------------------------------------------------------------------------------------------------------------------------------------------------------------|----------------|----------------------------------|-----------------------------------------|-------------------------------------------|----------------------------|----------------------------|
| Date: <input type="text"/>   <input type="text"/>   <input type="text"/>  YEAR  <input type="text"/>   <input type="text"/>  MONTH  <input type="text"/>   <input type="text"/>  DAY |                |                                  |                                         | Normal range Number: <input type="text"/> |                            |                            |
| Item                                                                                                                                                                                 | Result         |                                  |                                         | Result Interpretation                     |                            |                            |
| TNF- $\alpha$                                                                                                                                                                        | Measured Value | Unit                             |                                         | Normal<br>1                               | Abnormal                   |                            |
|                                                                                                                                                                                      |                | <input type="checkbox"/> 1 pg/mL | <input type="checkbox"/> 2 Other: _____ |                                           | <input type="checkbox"/> 1 | <input type="checkbox"/> 2 |
|                                                                                                                                                                                      |                |                                  |                                         |                                           |                            |                            |

| <b>TNF-<math>\alpha</math></b> <input type="checkbox"/> Unexamined, reason _____                                                                                                     |                |                                  |                                         |                                           |                            |                            |
|--------------------------------------------------------------------------------------------------------------------------------------------------------------------------------------|----------------|----------------------------------|-----------------------------------------|-------------------------------------------|----------------------------|----------------------------|
| Date: <input type="text"/>   <input type="text"/>   <input type="text"/>  YEAR  <input type="text"/>   <input type="text"/>  MONTH  <input type="text"/>   <input type="text"/>  DAY |                |                                  |                                         | Normal range Number: <input type="text"/> |                            |                            |
| Item                                                                                                                                                                                 | Result         |                                  |                                         | Result Interpretation                     |                            |                            |
| TNF- $\alpha$                                                                                                                                                                        | Measured Value | Unit                             |                                         | Normal<br>1                               | Abnormal                   |                            |
|                                                                                                                                                                                      |                | <input type="checkbox"/> 1 pg/mL | <input type="checkbox"/> 2 Other: _____ |                                           | <input type="checkbox"/> 1 | <input type="checkbox"/> 2 |
|                                                                                                                                                                                      |                |                                  |                                         |                                           |                            |                            |

| <b>TNF-<math>\alpha</math></b> <input type="checkbox"/> Unexamined, reason _____                                                                                                     |                |                                  |                                         |                                           |                            |                            |
|--------------------------------------------------------------------------------------------------------------------------------------------------------------------------------------|----------------|----------------------------------|-----------------------------------------|-------------------------------------------|----------------------------|----------------------------|
| Date: <input type="text"/>   <input type="text"/>   <input type="text"/>  YEAR  <input type="text"/>   <input type="text"/>  MONTH  <input type="text"/>   <input type="text"/>  DAY |                |                                  |                                         | Normal range Number: <input type="text"/> |                            |                            |
| Item                                                                                                                                                                                 | Result         |                                  |                                         | Result Interpretation                     |                            |                            |
| TNF- $\alpha$                                                                                                                                                                        | Measured Value | Unit                             |                                         | Normal<br>1                               | Abnormal                   |                            |
|                                                                                                                                                                                      |                | <input type="checkbox"/> 1 pg/mL | <input type="checkbox"/> 2 Other: _____ |                                           | <input type="checkbox"/> 1 | <input type="checkbox"/> 2 |
|                                                                                                                                                                                      |                |                                  |                                         |                                           |                            |                            |

| <b>TNF-<math>\alpha</math></b> <input type="checkbox"/> Unexamined, reason _____                                                                                                     |                |                                  |                                         |                                           |                            |                            |
|--------------------------------------------------------------------------------------------------------------------------------------------------------------------------------------|----------------|----------------------------------|-----------------------------------------|-------------------------------------------|----------------------------|----------------------------|
| Date: <input type="text"/>   <input type="text"/>   <input type="text"/>  YEAR  <input type="text"/>   <input type="text"/>  MONTH  <input type="text"/>   <input type="text"/>  DAY |                |                                  |                                         | Normal range Number: <input type="text"/> |                            |                            |
| Item                                                                                                                                                                                 | Result         |                                  |                                         | Result Interpretation                     |                            |                            |
| TNF- $\alpha$                                                                                                                                                                        | Measured Value | Unit                             |                                         | Normal<br>1                               | Abnormal                   |                            |
|                                                                                                                                                                                      |                | <input type="checkbox"/> 1 pg/mL | <input type="checkbox"/> 2 Other: _____ |                                           | <input type="checkbox"/> 1 | <input type="checkbox"/> 2 |
|                                                                                                                                                                                      |                |                                  |                                         |                                           |                            |                            |

|                                                   |                                    |
|---------------------------------------------------|------------------------------------|
| Protocol Number: KY2020-29                        | <b>Attachement<br/>Out of Plan</b> |
| Center Number  __    Subject Screening Number  __ |                                    |

| <b>IL-6</b> <input type="checkbox"/> _0 Unexamined, reason _____ |                |                                   |                                          |                          |                             |                             |
|------------------------------------------------------------------|----------------|-----------------------------------|------------------------------------------|--------------------------|-----------------------------|-----------------------------|
| Date:  __        YEAR  __    MONTH  __    DAY                    |                |                                   |                                          | Normal range Number:  __ |                             |                             |
| Item                                                             | Result         |                                   |                                          | Result Interpretation    |                             |                             |
| IL-6                                                             | Measured Value | Unit                              |                                          | Norma<br>l               | Abnormal                    |                             |
|                                                                  |                | <input type="checkbox"/> _1 pg/mL | <input type="checkbox"/> _2 Other: _____ |                          | <input type="checkbox"/> _1 | <input type="checkbox"/> _2 |
|                                                                  |                |                                   |                                          |                          |                             |                             |

| <b>IL-6</b> <input type="checkbox"/> _0 Unexamined, reason _____ |                |                                   |                                          |                          |                             |                             |
|------------------------------------------------------------------|----------------|-----------------------------------|------------------------------------------|--------------------------|-----------------------------|-----------------------------|
| Date:  __        YEAR  __    MONTH  __    DAY                    |                |                                   |                                          | Normal range Number:  __ |                             |                             |
| Item                                                             | Result         |                                   |                                          | Result Interpretation    |                             |                             |
| IL-6                                                             | Measured Value | Unit                              |                                          | Norma<br>l               | Abnormal                    |                             |
|                                                                  |                | <input type="checkbox"/> _1 pg/mL | <input type="checkbox"/> _2 Other: _____ |                          | <input type="checkbox"/> _1 | <input type="checkbox"/> _2 |
|                                                                  |                |                                   |                                          |                          |                             |                             |

| <b>IL-6</b> <input type="checkbox"/> _0 Unexamined, reason _____ |                |                                   |                                          |                          |                             |                             |
|------------------------------------------------------------------|----------------|-----------------------------------|------------------------------------------|--------------------------|-----------------------------|-----------------------------|
| Date:  __        YEAR  __    MONTH  __    DAY                    |                |                                   |                                          | Normal range Number:  __ |                             |                             |
| Item                                                             | Result         |                                   |                                          | Result Interpretation    |                             |                             |
| IL-6                                                             | Measured Value | Unit                              |                                          | Norma<br>l               | Abnormal                    |                             |
|                                                                  |                | <input type="checkbox"/> _1 pg/mL | <input type="checkbox"/> _2 Other: _____ |                          | <input type="checkbox"/> _1 | <input type="checkbox"/> _2 |
|                                                                  |                |                                   |                                          |                          |                             |                             |

| <b>IL-6</b> <input type="checkbox"/> _0 Unexamined, reason _____ |                |                                   |                                          |                          |                             |                             |
|------------------------------------------------------------------|----------------|-----------------------------------|------------------------------------------|--------------------------|-----------------------------|-----------------------------|
| Date:  __        YEAR  __    MONTH  __    DAY                    |                |                                   |                                          | Normal range Number:  __ |                             |                             |
| Item                                                             | Result         |                                   |                                          | Result Interpretation    |                             |                             |
| IL-6                                                             | Measured Value | Unit                              |                                          | Norma<br>l               | Abnormal                    |                             |
|                                                                  |                | <input type="checkbox"/> _1 pg/mL | <input type="checkbox"/> _2 Other: _____ |                          | <input type="checkbox"/> _1 | <input type="checkbox"/> _2 |
|                                                                  |                |                                   |                                          |                          |                             |                             |

| <b>IL-6</b> <input type="checkbox"/> _0 Unexamined, reason _____ |                |                                   |                                          |                          |                             |                             |
|------------------------------------------------------------------|----------------|-----------------------------------|------------------------------------------|--------------------------|-----------------------------|-----------------------------|
| Date:  __        YEAR  __    MONTH  __    DAY                    |                |                                   |                                          | Normal range Number:  __ |                             |                             |
| Item                                                             | Result         |                                   |                                          | Result Interpretation    |                             |                             |
| IL-6                                                             | Measured Value | Unit                              |                                          | Norma<br>l               | Abnormal                    |                             |
|                                                                  |                | <input type="checkbox"/> _1 pg/mL | <input type="checkbox"/> _2 Other: _____ |                          | <input type="checkbox"/> _1 | <input type="checkbox"/> _2 |
|                                                                  |                |                                   |                                          |                          |                             |                             |

|                                                                     |                                    |
|---------------------------------------------------------------------|------------------------------------|
| Protocol Number: KY2020-29                                          | <b>Attachement<br/>Out of Plan</b> |
| Center Number  __ __       Subject Screening Number  __ __ __ __ __ |                                    |

|                                                                                                                                                                                                                         |
|-------------------------------------------------------------------------------------------------------------------------------------------------------------------------------------------------------------------------|
| <b>Urine or serum HCG (Only applicable to women of childbearing age)</b> <input type="checkbox"/> 0 Unexamined,<br>reason _____<br><input type="checkbox"/> 1 Not Applicable (Man or woman who isn't able to reproduce) |
| Date:  __ __ __ __ YEAR __ __ MONTH __ __ DAY                                                                                                                                                                           |
| Sample: <input type="checkbox"/> 1 Blood <input type="checkbox"/> 2 Urine                                                                                                                                               |
| Result: <input type="checkbox"/> 1 Negative <input type="checkbox"/> 2 Positive                                                                                                                                         |

|                                                                                                                                                                                                                         |
|-------------------------------------------------------------------------------------------------------------------------------------------------------------------------------------------------------------------------|
| <b>Urine or serum HCG (Only applicable to women of childbearing age)</b> <input type="checkbox"/> 0 Unexamined,<br>reason _____<br><input type="checkbox"/> 1 Not Applicable (Man or woman who isn't able to reproduce) |
| Date:  __ __ __ __ YEAR __ __ MONTH __ __ DAY                                                                                                                                                                           |
| Sample: <input type="checkbox"/> 1 Blood <input type="checkbox"/> 2 Urine                                                                                                                                               |
| Result: <input type="checkbox"/> 1 Negative <input type="checkbox"/> 2 Positive                                                                                                                                         |

|                                                                                                                                                                                                                         |
|-------------------------------------------------------------------------------------------------------------------------------------------------------------------------------------------------------------------------|
| <b>Urine or serum HCG (Only applicable to women of childbearing age)</b> <input type="checkbox"/> 0 Unexamined,<br>reason _____<br><input type="checkbox"/> 1 Not Applicable (Man or woman who isn't able to reproduce) |
| Date:  __ __ __ __ YEAR __ __ MONTH __ __ DAY                                                                                                                                                                           |
| Sample: <input type="checkbox"/> 1 Blood <input type="checkbox"/> 2 Urine                                                                                                                                               |
| Result: <input type="checkbox"/> 1 Negative <input type="checkbox"/> 2 Positive                                                                                                                                         |

|                                                                                                                                                                                                                         |
|-------------------------------------------------------------------------------------------------------------------------------------------------------------------------------------------------------------------------|
| <b>Urine or serum HCG (Only applicable to women of childbearing age)</b> <input type="checkbox"/> 0 Unexamined,<br>reason _____<br><input type="checkbox"/> 1 Not Applicable (Man or woman who isn't able to reproduce) |
| Date:  __ __ __ __ YEAR __ __ MONTH __ __ DAY                                                                                                                                                                           |
| Sample: <input type="checkbox"/> 1 Blood <input type="checkbox"/> 2 Urine                                                                                                                                               |
| Result: <input type="checkbox"/> 1 Negative <input type="checkbox"/> 2 Positive                                                                                                                                         |

|                                                                                                                                                                                                                         |
|-------------------------------------------------------------------------------------------------------------------------------------------------------------------------------------------------------------------------|
| <b>Urine or serum HCG (Only applicable to women of childbearing age)</b> <input type="checkbox"/> 0 Unexamined,<br>reason _____<br><input type="checkbox"/> 1 Not Applicable (Man or woman who isn't able to reproduce) |
| Date:  __ __ __ __ YEAR __ __ MONTH __ __ DAY                                                                                                                                                                           |

|                                                                                 |                                     |                                    |
|---------------------------------------------------------------------------------|-------------------------------------|------------------------------------|
| Protocol Number: KY2020-29                                                      |                                     | <b>Attachement<br/>Out of Plan</b> |
| Center Number  _ _                                                              | Subject Screening Number  _ _ _ _ _ |                                    |
| Sample: <input type="checkbox"/> 1 Blood <input type="checkbox"/> 2 Urine       |                                     |                                    |
| Result: <input type="checkbox"/> 1 Negative <input type="checkbox"/> 2 Positive |                                     |                                    |



|                            |                                      |                                    |
|----------------------------|--------------------------------------|------------------------------------|
| Protocol Number: KY2020-29 |                                      | <b>Attachement<br/>Out of Plan</b> |
| Center Number  __ _        | Subject Screening Number  __ _ _ _ _ |                                    |

|                                                                                                                                                                    |
|--------------------------------------------------------------------------------------------------------------------------------------------------------------------|
| <b>Routine 12 Leads Electrocardiogram</b> <input type="checkbox"/> 0 Unexamined, reason _____                                                                      |
| Date:  __ _ _ _   YEAR __ _   MONTH __ _   DAY                                                                                                                     |
| Result: <input type="checkbox"/> 1 Normal <input type="checkbox"/> 2 Abnormal, No Clinical significance <input type="checkbox"/> 3 Abnormal Significant clinically |
| If "Abnormal", please describe: _____<br>_____                                                                                                                     |

|                                                                                                                                                                    |
|--------------------------------------------------------------------------------------------------------------------------------------------------------------------|
| <b>Routine 12 Leads Electrocardiogram</b> <input type="checkbox"/> 0 Unexamined, reason _____                                                                      |
| Date:  __ _ _ _   YEAR __ _   MONTH __ _   DAY                                                                                                                     |
| Result: <input type="checkbox"/> 1 Normal <input type="checkbox"/> 2 Abnormal, No Clinical significance <input type="checkbox"/> 3 Abnormal Significant clinically |
| If "Abnormal", please describe: _____<br>_____                                                                                                                     |

|                                                                                                                                                                    |
|--------------------------------------------------------------------------------------------------------------------------------------------------------------------|
| <b>Routine 12 Leads Electrocardiogram</b> <input type="checkbox"/> 0 Unexamined, reason _____                                                                      |
| Date:  __ _ _ _   YEAR __ _   MONTH __ _   DAY                                                                                                                     |
| Result: <input type="checkbox"/> 1 Normal <input type="checkbox"/> 2 Abnormal, No Clinical significance <input type="checkbox"/> 3 Abnormal Significant clinically |
| If "Abnormal", please describe: _____<br>_____                                                                                                                     |

|                                                                                                                                                                    |
|--------------------------------------------------------------------------------------------------------------------------------------------------------------------|
| <b>Routine 12 Leads Electrocardiogram</b> <input type="checkbox"/> 0 Unexamined, reason _____                                                                      |
| Date:  __ _ _ _   YEAR __ _   MONTH __ _   DAY                                                                                                                     |
| Result: <input type="checkbox"/> 1 Normal <input type="checkbox"/> 2 Abnormal, No Clinical significance <input type="checkbox"/> 3 Abnormal Significant clinically |
| If "Abnormal", please describe: _____<br>_____                                                                                                                     |

|                                                                                                                                                                    |
|--------------------------------------------------------------------------------------------------------------------------------------------------------------------|
| <b>Routine 12 Leads Electrocardiogram</b> <input type="checkbox"/> 0 Unexamined, reason _____                                                                      |
| Date:  __ _ _ _   YEAR __ _   MONTH __ _   DAY                                                                                                                     |
| Result: <input type="checkbox"/> 1 Normal <input type="checkbox"/> 2 Abnormal, No Clinical significance <input type="checkbox"/> 3 Abnormal Significant clinically |
| If "Abnormal", please describe: _____<br>_____                                                                                                                     |

|                                                                                                                                                                    |
|--------------------------------------------------------------------------------------------------------------------------------------------------------------------|
| <b>Routine 12 Leads Electrocardiogram</b> <input type="checkbox"/> 0 Unexamined, reason _____                                                                      |
| Date:  __ _ _ _   YEAR __ _   MONTH __ _   DAY                                                                                                                     |
| Result: <input type="checkbox"/> 1 Normal <input type="checkbox"/> 2 Abnormal, No Clinical significance <input type="checkbox"/> 3 Abnormal Significant clinically |
| If "Abnormal", please describe: _____<br>_____                                                                                                                     |



|                            |                                      |                                    |
|----------------------------|--------------------------------------|------------------------------------|
| Protocol Number: KY2020-29 |                                      | <b>Attachement<br/>Out of Plan</b> |
| Center Number  __ _        | Subject Screening Number  __ _ _ _ _ |                                    |

|                                                                                                              |
|--------------------------------------------------------------------------------------------------------------|
| <b>Pulse oxygen saturation (without oxygen inhalation )</b> <input type="checkbox"/> Unexamined, reason_____ |
| Date:  __ _ _ _ YEAR __ _ MONTH __ _ DAY                                                                     |
| Measured Value: _____% (Rest state)                                                                          |

|                                                                                                              |
|--------------------------------------------------------------------------------------------------------------|
| <b>Pulse oxygen saturation (without oxygen inhalation )</b> <input type="checkbox"/> Unexamined, reason_____ |
| Date:  __ _ _ _ YEAR __ _ MONTH __ _ DAY                                                                     |
| Measured Value: _____% (Rest state)                                                                          |

|                                                                                                              |
|--------------------------------------------------------------------------------------------------------------|
| <b>Pulse oxygen saturation (without oxygen inhalation )</b> <input type="checkbox"/> Unexamined, reason_____ |
| Date:  __ _ _ _ YEAR __ _ MONTH __ _ DAY                                                                     |
| Measured Value: _____% (Rest state)                                                                          |

|                                                                                                              |
|--------------------------------------------------------------------------------------------------------------|
| <b>Pulse oxygen saturation (without oxygen inhalation )</b> <input type="checkbox"/> Unexamined, reason_____ |
| Date:  __ _ _ _ YEAR __ _ MONTH __ _ DAY                                                                     |
| Measured Value: _____% (Rest state)                                                                          |

|                                                                                                              |
|--------------------------------------------------------------------------------------------------------------|
| <b>Pulse oxygen saturation (without oxygen inhalation )</b> <input type="checkbox"/> Unexamined, reason_____ |
| Date:  __ _ _ _ YEAR __ _ MONTH __ _ DAY                                                                     |
| Measured Value: _____% (Rest state)                                                                          |

|                                                                                                              |
|--------------------------------------------------------------------------------------------------------------|
| <b>Pulse oxygen saturation (without oxygen inhalation )</b> <input type="checkbox"/> Unexamined, reason_____ |
| Date:  __ _ _ _ YEAR __ _ MONTH __ _ DAY                                                                     |
| Measured Value: _____% (Rest state)                                                                          |

|                                                                                                              |
|--------------------------------------------------------------------------------------------------------------|
| <b>Pulse oxygen saturation (without oxygen inhalation )</b> <input type="checkbox"/> Unexamined, reason_____ |
| Date:  __ _ _ _ YEAR __ _ MONTH __ _ DAY                                                                     |
| Measured Value: _____% (Rest state)                                                                          |

|                                                                        |                                    |
|------------------------------------------------------------------------|------------------------------------|
| Protocol Number: KY2020-29                                             | <b>Attachement<br/>Out of Plan</b> |
| Center Number  __ __       Subject Screening Number  __ __ __ __ __ __ |                                    |

|                                                                                                                                                                                                                                                                         |
|-------------------------------------------------------------------------------------------------------------------------------------------------------------------------------------------------------------------------------------------------------------------------|
| <b>Chest CT</b> <input type="checkbox"/> _0 Unexamined, reason _____                                                                                                                                                                                                    |
| Date:  __ __ __ __ __ __ YEAR __ __ MONTH __ __ DAY                                                                                                                                                                                                                     |
| Result: <input type="checkbox"/> _1 Normal <input type="checkbox"/> _2 Abnormal, No Clinical significance <input type="checkbox"/> _3 Abnormal, significant clinically <input type="checkbox"/> _4 _____                                                                |
| If abnormal, please describe _____                                                                                                                                                                                                                                      |
| Whether chest CT lesion absorbed $\geq$ 50% than baseline??<br><input type="checkbox"/> _0 NO <input type="checkbox"/> _1 YES <input type="checkbox"/> _2 Unidentified <input type="checkbox"/> _3 Unknown<br><input type="checkbox"/> _4 Other, please describe: _____ |

|                                                                                                                                                                                                                                                                         |
|-------------------------------------------------------------------------------------------------------------------------------------------------------------------------------------------------------------------------------------------------------------------------|
| <b>Chest CT</b> <input type="checkbox"/> _0 Unexamined, reason _____                                                                                                                                                                                                    |
| Date:  __ __ __ __ __ __ YEAR __ __ MONTH __ __ DAY                                                                                                                                                                                                                     |
| Result: <input type="checkbox"/> _1 Normal <input type="checkbox"/> _2 Abnormal, No Clinical significance <input type="checkbox"/> _3 Abnormal, significant clinically <input type="checkbox"/> _4 _____                                                                |
| If abnormal, please describe _____                                                                                                                                                                                                                                      |
| Whether chest CT lesion absorbed $\geq$ 50% than baseline??<br><input type="checkbox"/> _0 NO <input type="checkbox"/> _1 YES <input type="checkbox"/> _2 Unidentified <input type="checkbox"/> _3 Unknown<br><input type="checkbox"/> _4 Other, please describe: _____ |

|                                                                                                                                                                                                                                                                         |
|-------------------------------------------------------------------------------------------------------------------------------------------------------------------------------------------------------------------------------------------------------------------------|
| <b>Chest CT</b> <input type="checkbox"/> _0 Unexamined, reason _____                                                                                                                                                                                                    |
| Date:  __ __ __ __ __ __ YEAR __ __ MONTH __ __ DAY                                                                                                                                                                                                                     |
| Result: <input type="checkbox"/> _1 Normal <input type="checkbox"/> _2 Abnormal, No Clinical significance <input type="checkbox"/> _3 Abnormal, significant clinically <input type="checkbox"/> _4 _____                                                                |
| If abnormal, please describe _____                                                                                                                                                                                                                                      |
| Whether chest CT lesion absorbed $\geq$ 50% than baseline??<br><input type="checkbox"/> _0 NO <input type="checkbox"/> _1 YES <input type="checkbox"/> _2 Unidentified <input type="checkbox"/> _3 Unknown<br><input type="checkbox"/> _4 Other, please describe: _____ |

|                                                                                     |                                    |
|-------------------------------------------------------------------------------------|------------------------------------|
| Protocol Number: KY2020-29                                                          | <b>Attachement<br/>Out of Plan</b> |
| Center Number [ ] [ ]      Subject Screening Number [ ] [ ] [ ] [ ] [ ] [ ] [ ] [ ] |                                    |

| <b>Arterial Blood Gas Analysis</b> <input type="checkbox"/> <sub>0</sub> Unexamined, reason _____                                         |                |                                                                                                  |                                       |                                       |                                       |                                       |
|-------------------------------------------------------------------------------------------------------------------------------------------|----------------|--------------------------------------------------------------------------------------------------|---------------------------------------|---------------------------------------|---------------------------------------|---------------------------------------|
| Inhalate oxygen or not? <input type="checkbox"/> <sub>0</sub> No <input type="checkbox"/> <sub>1</sub> Yes, (FiO <sub>2</sub> ) : _____ % |                |                                                                                                  |                                       |                                       |                                       |                                       |
| Date: [ ] [ ] [ ] [ ]   YEAR   [ ] [ ]   MONTH   [ ] [ ]   DAY                                                                            |                |                                                                                                  |                                       |                                       |                                       |                                       |
| Item                                                                                                                                      | Result         |                                                                                                  | Result Interpretation                 |                                       |                                       | Unexamined                            |
|                                                                                                                                           | Measured Value | Unit                                                                                             | Normal                                | Abnormal                              |                                       |                                       |
|                                                                                                                                           |                |                                                                                                  |                                       | No Clinical significance              | Significant clinically                |                                       |
| Arterial partial pressure of oxygen (PaO <sub>2</sub> )                                                                                   |                | <input type="checkbox"/> <sub>1</sub> mmHg <input type="checkbox"/> <sub>2</sub><br>Other: _____ | <input type="checkbox"/> <sub>1</sub> | <input type="checkbox"/> <sub>2</sub> | <input type="checkbox"/> <sub>3</sub> | <input type="checkbox"/> <sub>0</sub> |
| Oxygen saturation (SaO <sub>2</sub> )                                                                                                     |                | <input type="checkbox"/> <sub>1</sub> % <input type="checkbox"/> <sub>2</sub> Other: _____       | <input type="checkbox"/> <sub>1</sub> | <input type="checkbox"/> <sub>2</sub> | <input type="checkbox"/> <sub>3</sub> | <input type="checkbox"/> <sub>0</sub> |

| <b>Arterial Blood Gas Analysis</b> <input type="checkbox"/> <sub>0</sub> Unexamined, reason _____                                         |                |                                                                                                  |                                       |                                       |                                       |                                       |
|-------------------------------------------------------------------------------------------------------------------------------------------|----------------|--------------------------------------------------------------------------------------------------|---------------------------------------|---------------------------------------|---------------------------------------|---------------------------------------|
| Inhalate oxygen or not? <input type="checkbox"/> <sub>0</sub> No <input type="checkbox"/> <sub>1</sub> Yes, (FiO <sub>2</sub> ) : _____ % |                |                                                                                                  |                                       |                                       |                                       |                                       |
| Date: [ ] [ ] [ ] [ ]   YEAR   [ ] [ ]   MONTH   [ ] [ ]   DAY                                                                            |                |                                                                                                  |                                       |                                       |                                       |                                       |
| Item                                                                                                                                      | Result         |                                                                                                  | Result Interpretation                 |                                       |                                       | Unexamined                            |
|                                                                                                                                           | Measured Value | Unit                                                                                             | Normal                                | Abnormal                              |                                       |                                       |
|                                                                                                                                           |                |                                                                                                  |                                       | No Clinical significance              | Significant clinically                |                                       |
| Arterial partial pressure of oxygen (PaO <sub>2</sub> )                                                                                   |                | <input type="checkbox"/> <sub>1</sub> mmHg <input type="checkbox"/> <sub>2</sub><br>Other: _____ | <input type="checkbox"/> <sub>1</sub> | <input type="checkbox"/> <sub>2</sub> | <input type="checkbox"/> <sub>3</sub> | <input type="checkbox"/> <sub>0</sub> |
| Oxygen saturation (SaO <sub>2</sub> )                                                                                                     |                | <input type="checkbox"/> <sub>1</sub> % <input type="checkbox"/> <sub>2</sub> Other: _____       | <input type="checkbox"/> <sub>1</sub> | <input type="checkbox"/> <sub>2</sub> | <input type="checkbox"/> <sub>3</sub> | <input type="checkbox"/> <sub>0</sub> |

|                                                                                     |                                    |
|-------------------------------------------------------------------------------------|------------------------------------|
| Protocol Number: KY2020-29                                                          | <b>Attachement<br/>Out of Plan</b> |
| Center Number [ ] [ ]      Subject Screening Number [ ] [ ] [ ] [ ] [ ] [ ] [ ] [ ] |                                    |

|                                                                             |                                                                                                                                                                                                                                                                                                                                                                                                                                                                                                                                                      |
|-----------------------------------------------------------------------------|------------------------------------------------------------------------------------------------------------------------------------------------------------------------------------------------------------------------------------------------------------------------------------------------------------------------------------------------------------------------------------------------------------------------------------------------------------------------------------------------------------------------------------------------------|
| <b>Clinical status</b> <input type="checkbox"/> No evaluation, reason _____ |                                                                                                                                                                                                                                                                                                                                                                                                                                                                                                                                                      |
| Date:                                                                       | [ ] [ ] [ ] [ ]  YEAR  [ ] [ ]  MONTH  [ ] [ ]  DAY                                                                                                                                                                                                                                                                                                                                                                                                                                                                                                  |
| Result                                                                      | <input type="checkbox"/> Level 1: discharge<br><input type="checkbox"/> Level 2: hospitalization, oxygen therapy is not required<br><input type="checkbox"/> Level 3: hospitalization, require oxygen therapy<br><input type="checkbox"/> Level 4:ICU/ hospitalization, require noninvasive ventilation (NIV)/<br>High flow nasal catheter oxygen therapy (HFNC)<br><input type="checkbox"/> Level 5:ICU, require extracorporeal membrane oxygenation<br>(ECMO)and/or invasive mechanical ventilation(IMV)<br><input type="checkbox"/> Level 6:Death |

|                                                                             |                                                                                                                                                                                                                                                                                                                                                                                                                                                                                                                                                      |
|-----------------------------------------------------------------------------|------------------------------------------------------------------------------------------------------------------------------------------------------------------------------------------------------------------------------------------------------------------------------------------------------------------------------------------------------------------------------------------------------------------------------------------------------------------------------------------------------------------------------------------------------|
| <b>Clinical status</b> <input type="checkbox"/> No evaluation, reason _____ |                                                                                                                                                                                                                                                                                                                                                                                                                                                                                                                                                      |
| Date:                                                                       | [ ] [ ] [ ] [ ]  YEAR  [ ] [ ]  MONTH  [ ] [ ]  DAY                                                                                                                                                                                                                                                                                                                                                                                                                                                                                                  |
| Result                                                                      | <input type="checkbox"/> Level 1: discharge<br><input type="checkbox"/> Level 2: hospitalization, oxygen therapy is not required<br><input type="checkbox"/> Level 3: hospitalization, require oxygen therapy<br><input type="checkbox"/> Level 4:ICU/ hospitalization, require noninvasive ventilation (NIV)/<br>High flow nasal catheter oxygen therapy (HFNC)<br><input type="checkbox"/> Level 5:ICU, require extracorporeal membrane oxygenation<br>(ECMO)and/or invasive mechanical ventilation(IMV)<br><input type="checkbox"/> Level 6:Death |

|                                                                             |                                                                                                                                                                                                                                                                                                                                                                                                                                                                                                                                                      |
|-----------------------------------------------------------------------------|------------------------------------------------------------------------------------------------------------------------------------------------------------------------------------------------------------------------------------------------------------------------------------------------------------------------------------------------------------------------------------------------------------------------------------------------------------------------------------------------------------------------------------------------------|
| <b>Clinical status</b> <input type="checkbox"/> No evaluation, reason _____ |                                                                                                                                                                                                                                                                                                                                                                                                                                                                                                                                                      |
| Date:                                                                       | [ ] [ ] [ ] [ ]  YEAR  [ ] [ ]  MONTH  [ ] [ ]  DAY                                                                                                                                                                                                                                                                                                                                                                                                                                                                                                  |
| Result                                                                      | <input type="checkbox"/> Level 1: discharge<br><input type="checkbox"/> Level 2: hospitalization, oxygen therapy is not required<br><input type="checkbox"/> Level 3: hospitalization, require oxygen therapy<br><input type="checkbox"/> Level 4:ICU/ hospitalization, require noninvasive ventilation (NIV)/<br>High flow nasal catheter oxygen therapy (HFNC)<br><input type="checkbox"/> Level 5:ICU, require extracorporeal membrane oxygenation<br>(ECMO)and/or invasive mechanical ventilation(IMV)<br><input type="checkbox"/> Level 6:Death |

|                                                                                    |                                |
|------------------------------------------------------------------------------------|--------------------------------|
| Signment of the Informed Consent Form (ICF)                                        |                                |
| Date of signing the Informed Consent                                               | _ _ _ _ YEAR _ _ MONTH _ _ DAY |
| Version number of the Informed Consent                                             | _____                          |
| The version number of the protocol shall apply when the Informed Consent is signed | _ _ ._ _                       |

|                                                                                    |                                |
|------------------------------------------------------------------------------------|--------------------------------|
| Signment of the Informed Consent Form (ICF)                                        |                                |
| Date of signing the Informed Consent                                               | _ _ _ _ YEAR _ _ MONTH _ _ DAY |
| Version number of the Informed Consent                                             | _____                          |
| The version number of the protocol shall apply when the Informed Consent is signed | _ _ ._ _                       |

|                                                                                    |                                |
|------------------------------------------------------------------------------------|--------------------------------|
| Signment of the Informed Consent Form (ICF)                                        |                                |
| Date of signing the Informed Consent                                               | _ _ _ _ YEAR _ _ MONTH _ _ DAY |
| Version number of the Informed Consent                                             | _____                          |
| The version number of the protocol shall apply when the Informed Consent is signed | _ _ ._ _                       |

|                                                                                    |                                |
|------------------------------------------------------------------------------------|--------------------------------|
| Signment of the Informed Consent Form (ICF)                                        |                                |
| Date of signing the Informed Consent                                               | _ _ _ _ YEAR _ _ MONTH _ _ DAY |
| Version number of the Informed Consent                                             | _____                          |
| The version number of the protocol shall apply when the Informed Consent is signed | _ _ ._ _                       |

|                                                                                    |                                |
|------------------------------------------------------------------------------------|--------------------------------|
| Signment of the Informed Consent Form (ICF)                                        |                                |
| Date of signing the Informed Consent                                               | _ _ _ _ YEAR _ _ MONTH _ _ DAY |
| Version number of the Informed Consent                                             | _____                          |
| The version number of the protocol shall apply when the Informed Consent is signed | _ _ ._ _                       |

## **Final Case Report Form: KY2020-29**

This is the original version of the final Case Report Form  
in Chinese.



# 硫酸羟氯喹治疗新型冠状病毒肺炎的一项随机、对照、开放的多中心研究

## 病例报告表

### (Case Report Form)

中心编号：

受试者筛选号：

受试者姓名缩写：

研究中心名称（正楷）： \_\_\_\_\_

研究医生姓名（正楷）： \_\_\_\_\_

版本号及日期： 3.0 版/2020 年 2 月 25 日

适用临床分型： 轻型/普通型

#### 保密声明

本文件包含的相关信息涉及商业机密和商业信息，这些商业信息术语保密内容或专有信息，若非法要求，任何人不得擅自公开这些保密内容。任何接触到该文件的个人应当了解文件的专有性或机密性，并不得擅自公开文件。以上文件保密方面的限制条款将适用于未来提供给你的任何注明具有专有性或机密性的资料。

## 填表指南

1. 病例报告表须由授权人员负责观察记录, 并对CRF中的每一页认真检查并签字。
2. 试验医师应熟悉试验方案, 并掌握GCP原则。
3. 请用蓝色或黑色签字笔填写, 字迹应清晰, 易于辨认, 英文最好用大写字母, 例如: **CASE REPORT FORM**。
4. 在开放的方格中填写数字时, 每一格填写一个数字; 如果数字位数少于相应的格子数时请以零填充, 不可出现空格。例如: **56Kg**, 填入空格中为: |0|5|6|. |0|0|Kg。
5. 日期采用国际ISO8601日期格式: **yyyymmdd**。例如2007年12月21日写成|2|0|0|7|年|1|2|月|2|1|日。
6. 表中凡有“□”的项目, 请在符合的方框内打“x”, 或填写相关数字, 如果未做或数据无法获得, 请在相应空格上填写ND (未完成) 或NK (无法获知); 不适用填写NA。
7. 每项填写内容务必准确, 不得随便涂改, 禁止使用涂改液或以其他方式掩盖原始数据。如发现填写内容有误, 请用单横线划去错误的记录, 使原有记录仍可辨认, 在右上方填写正确记录, 并注明修改者的姓名缩写及修改日期。如: ~~58.6~~<sup>56.8 ZH 2007-12-21</sup>。
8. 患者姓名拼音缩写四格应填满, 两字姓名按每个字前两个字母填写, 三字姓名按三字的首字母和第三个字的第二个字母填写; 四字姓名填写每一个字的首字母。每位患者姓名的拼音缩写应在其CRF中统一。举例: 张红|Z|H|H|0|, 李淑明|L|S|M|I|, 欧阳小惠|O|Y|X|H|。
9. 不要改变病例报告表的格式, 如发现表中没有填写位置填写记录者希望记录的资料时, 请联系负责的CRA。
10. 病例报告表填写完成后, 主要研究者应检查病例报告表的每一页记录, 并在病例报告表的研究者声明处签字。

|                   |              |
|-------------------|--------------|
| 研究方案编号: KY2020-29 | 筛选期/治疗期      |
| 研究中心编号  __        | 受试者筛选号  __   |
|                   | 访视 1 (D-3~1) |

本次访视日期: |\_\_|年|\_\_|月|\_\_|日

| 签署知情同意书         |                                                             |
|-----------------|-------------------------------------------------------------|
| 是否签署知情同意书       | <input type="checkbox"/> _0 否 <input type="checkbox"/> _1 是 |
| 签署知情同意书日期       | __ 年 __ 月 __ 日                                              |
| 知情同意书版本号        | _____                                                       |
| 签署知情同意书时适用方案版本号 | __ . __                                                     |

| 确认入选/排除标准                                                                                  |                                                                                                                                                                                                                                                                                                        |
|--------------------------------------------------------------------------------------------|--------------------------------------------------------------------------------------------------------------------------------------------------------------------------------------------------------------------------------------------------------------------------------------------------------|
| 受试者是否满足所有入选标准且不满足所有排除标准? <input type="checkbox"/> _1 是 <input type="checkbox"/> _0 否, 请填写。 |                                                                                                                                                                                                                                                                                                        |
| <input type="checkbox"/> _1 不满足入选标准, 入选标准编号 (可多选)                                          | <input type="checkbox"/> _1 <input type="checkbox"/> _2 <input type="checkbox"/> _3 <input type="checkbox"/> _4 <input type="checkbox"/> _5 <input type="checkbox"/> _6 <input type="checkbox"/> _7<br><input type="checkbox"/> 其他, 请描述: _____                                                         |
| <input type="checkbox"/> _2 满足排除标准, 排除标准编号 (可多选)                                           | <input type="checkbox"/> _1 <input type="checkbox"/> _2 <input type="checkbox"/> _3 <input type="checkbox"/> _4 <input type="checkbox"/> _5 <input type="checkbox"/> _6 <input type="checkbox"/> _7<br><input type="checkbox"/> _8 <input type="checkbox"/> _9 <input type="checkbox"/> 其他, 请描述: _____ |

| 人口学资料   |                                                                          |
|---------|--------------------------------------------------------------------------|
| 性 别     | <input type="checkbox"/> _1 男 <input type="checkbox"/> _2 女              |
| 出 生 日 期 | __ 年 __ 月 __ 日    如不能获得, 请填写年龄:  __  岁                                   |
| 民 族     | <input type="checkbox"/> _1 汉 <input type="checkbox"/> _2 其他, 请描述: _____ |

| 新型冠状病毒肺炎病史         |                                                                                                                                                               |
|--------------------|---------------------------------------------------------------------------------------------------------------------------------------------------------------|
| 首次发病日期             | __ 年 __ 月 __ 日                                                                                                                                                |
| 发病前 14 天内有无相关病源接触史 | <input type="checkbox"/> _0 无 <input type="checkbox"/> _1 有 <input type="checkbox"/> _2 未知                                                                    |
| 接触类型 (可多选)         | <input type="checkbox"/> _1 接触湖北地区<br><input type="checkbox"/> _2 接触新型冠状病毒感染者<br><input type="checkbox"/> _3 未知<br><input type="checkbox"/> _4 其他, 请描述: _____ |
| 既往有无进行抗新型冠状病毒肺炎治疗  | <input type="checkbox"/> _0 无 <input type="checkbox"/> _1 有                                                                                                   |
| 首次核酸检测阳性报告日期       | __ 年 __ 月 __ 日                                                                                                                                                |
| 入组时临床分型            | <input type="checkbox"/> _1 轻型 <input type="checkbox"/> _2 普通型 <input type="checkbox"/> _3 重型 <input type="checkbox"/> _4 危重型                                 |

|                   |              |
|-------------------|--------------|
| 研究方案编号: KY2020-29 | 筛选期/治疗期      |
| 研究中心编号  __        | 受试者筛选号  __   |
|                   | 访视 1 (D-3~1) |

注: 如进行抗新型冠状病毒肺炎治疗, 请在“既往/合并药物治疗”和“既往/合并非药物治疗”表中填写。

### 药物过敏史

受试者有无药物过敏史?

<sub>0</sub> 无    <sub>1</sub> 有, 请描述: \_\_\_\_\_

### 既往/伴随疾病

受试者是否有除新型冠状病毒肺炎之外的既往/伴随疾病?    <sub>0</sub> 否    <sub>1</sub> 是, 请填写下表。

| 编号 | 疾病名称 | 确诊日期               | 目前是否持续?                                                                            | 结束日期               | 是否接受治疗                                                                             |
|----|------|--------------------|------------------------------------------------------------------------------------|--------------------|------------------------------------------------------------------------------------|
| 1  |      | __ 年<br> __ 月 __ 日 | <input type="checkbox"/> <sub>0</sub> 否<br><input type="checkbox"/> <sub>1</sub> 是 | __ 年<br> __ 月 __ 日 | <input type="checkbox"/> <sub>0</sub> 否<br><input type="checkbox"/> <sub>1</sub> 是 |
| 2  |      | __ 年<br> __ 月 __ 日 | <input type="checkbox"/> <sub>0</sub> 否<br><input type="checkbox"/> <sub>1</sub> 是 | __ 年<br> __ 月 __ 日 | <input type="checkbox"/> <sub>0</sub> 否<br><input type="checkbox"/> <sub>1</sub> 是 |
| 3  |      | __ 年<br> __ 月 __ 日 | <input type="checkbox"/> <sub>0</sub> 否<br><input type="checkbox"/> <sub>1</sub> 是 | __ 年<br> __ 月 __ 日 | <input type="checkbox"/> <sub>0</sub> 否<br><input type="checkbox"/> <sub>1</sub> 是 |
| 4  |      | __ 年<br> __ 月 __ 日 | <input type="checkbox"/> <sub>0</sub> 否<br><input type="checkbox"/> <sub>1</sub> 是 | __ 年<br> __ 月 __ 日 | <input type="checkbox"/> <sub>0</sub> 否<br><input type="checkbox"/> <sub>1</sub> 是 |
| 5  |      | __ 年<br> __ 月 __ 日 | <input type="checkbox"/> <sub>0</sub> 否<br><input type="checkbox"/> <sub>1</sub> 是 | __ 年<br> __ 月 __ 日 | <input type="checkbox"/> <sub>0</sub> 否<br><input type="checkbox"/> <sub>1</sub> 是 |
| 6  |      | __ 年<br> __ 月 __ 日 | <input type="checkbox"/> <sub>0</sub> 否<br><input type="checkbox"/> <sub>1</sub> 是 | __ 年<br> __ 月 __ 日 | <input type="checkbox"/> <sub>0</sub> 否<br><input type="checkbox"/> <sub>1</sub> 是 |
| 7  |      | __ 年<br> __ 月 __ 日 | <input type="checkbox"/> <sub>0</sub> 否<br><input type="checkbox"/> <sub>1</sub> 是 | __ 年<br> __ 月 __ 日 | <input type="checkbox"/> <sub>0</sub> 否<br><input type="checkbox"/> <sub>1</sub> 是 |
| 8  |      | __ 年<br> __ 月 __ 日 | <input type="checkbox"/> <sub>0</sub> 否<br><input type="checkbox"/> <sub>1</sub> 是 | __ 年<br> __ 月 __ 日 | <input type="checkbox"/> <sub>0</sub> 否<br><input type="checkbox"/> <sub>1</sub> 是 |
| 9  |      | __ 年<br> __ 月 __ 日 | <input type="checkbox"/> <sub>0</sub> 否<br><input type="checkbox"/> <sub>1</sub> 是 | __ 年<br> __ 月 __ 日 | <input type="checkbox"/> <sub>0</sub> 否<br><input type="checkbox"/> <sub>1</sub> 是 |
| 10 |      | __ 年<br> __ 月 __ 日 | <input type="checkbox"/> <sub>0</sub> 否<br><input type="checkbox"/> <sub>1</sub> 是 | __ 年<br> __ 月 __ 日 | <input type="checkbox"/> <sub>0</sub> 否<br><input type="checkbox"/> <sub>1</sub> 是 |

### 生命体征

<sub>0</sub> 未查, 原因 \_\_\_\_\_

|       |                |      |                                                                                                                                                                                                                                                                     |
|-------|----------------|------|---------------------------------------------------------------------------------------------------------------------------------------------------------------------------------------------------------------------------------------------------------------------|
| 检查日期  | __ 年 __ 月 __ 日 |      |                                                                                                                                                                                                                                                                     |
| 日最高体温 | __ . __ °C     | 测量方式 | <input type="checkbox"/> <sub>1</sub> 腋下 <input type="checkbox"/> <sub>2</sub> 口腔 <input type="checkbox"/> <sub>3</sub> 肛门<br><input type="checkbox"/> <sub>4</sub> 耳朵 <input type="checkbox"/> <sub>5</sub> 未知 <input type="checkbox"/> <sub>6</sub> 其他, 请描述 _____ |
| 呼吸频率  | __ 次/分         | 脉搏   | __ 次/分                                                                                                                                                                                                                                                              |

|                   |                  |
|-------------------|------------------|
| 研究方案编号: KY2020-29 | 筛选期/治疗期          |
| 研究中心编号  __        | 受试者筛选号  __ __ __ |
| 访视 1 (D-3~1)      |                  |

|    |                                     |
|----|-------------------------------------|
| 血压 | __ __ __ / __ __ __  mmHg (收缩压/舒张压) |
|----|-------------------------------------|

**体格检查**      <sub>0</sub> 未查, 原因 \_\_\_\_\_

检查日期: |\_\_|\_\_|\_\_|年|\_\_|\_\_|月|\_\_|\_\_|日

| 检查部位   | 检查结果                                  |                                       |                                       |                                       | 异常请描述 |
|--------|---------------------------------------|---------------------------------------|---------------------------------------|---------------------------------------|-------|
|        | 1=正常                                  | 2=异常无临床意义                             | 3=异常有临床意义                             | 0=未查                                  |       |
| 整体外观   | <input type="checkbox"/> <sub>1</sub> | <input type="checkbox"/> <sub>2</sub> | <input type="checkbox"/> <sub>3</sub> | <input type="checkbox"/> <sub>0</sub> |       |
| 头      | <input type="checkbox"/> <sub>1</sub> | <input type="checkbox"/> <sub>2</sub> | <input type="checkbox"/> <sub>3</sub> | <input type="checkbox"/> <sub>0</sub> |       |
| 眼      | <input type="checkbox"/> <sub>1</sub> | <input type="checkbox"/> <sub>2</sub> | <input type="checkbox"/> <sub>3</sub> | <input type="checkbox"/> <sub>0</sub> |       |
| 耳      | <input type="checkbox"/> <sub>1</sub> | <input type="checkbox"/> <sub>2</sub> | <input type="checkbox"/> <sub>3</sub> | <input type="checkbox"/> <sub>0</sub> |       |
| 鼻      | <input type="checkbox"/> <sub>1</sub> | <input type="checkbox"/> <sub>2</sub> | <input type="checkbox"/> <sub>3</sub> | <input type="checkbox"/> <sub>0</sub> |       |
| 喉      | <input type="checkbox"/> <sub>1</sub> | <input type="checkbox"/> <sub>2</sub> | <input type="checkbox"/> <sub>3</sub> | <input type="checkbox"/> <sub>0</sub> |       |
| 颈部及甲状腺 | <input type="checkbox"/> <sub>1</sub> | <input type="checkbox"/> <sub>2</sub> | <input type="checkbox"/> <sub>3</sub> | <input type="checkbox"/> <sub>0</sub> |       |
| 皮肤     | <input type="checkbox"/> <sub>1</sub> | <input type="checkbox"/> <sub>2</sub> | <input type="checkbox"/> <sub>3</sub> | <input type="checkbox"/> <sub>0</sub> |       |
| 心血管系统  | <input type="checkbox"/> <sub>1</sub> | <input type="checkbox"/> <sub>2</sub> | <input type="checkbox"/> <sub>3</sub> | <input type="checkbox"/> <sub>0</sub> |       |
| 胸部及肺   | <input type="checkbox"/> <sub>1</sub> | <input type="checkbox"/> <sub>2</sub> | <input type="checkbox"/> <sub>3</sub> | <input type="checkbox"/> <sub>0</sub> |       |
| 腹部     | <input type="checkbox"/> <sub>1</sub> | <input type="checkbox"/> <sub>2</sub> | <input type="checkbox"/> <sub>3</sub> | <input type="checkbox"/> <sub>0</sub> |       |
| 神经系统   | <input type="checkbox"/> <sub>1</sub> | <input type="checkbox"/> <sub>2</sub> | <input type="checkbox"/> <sub>3</sub> | <input type="checkbox"/> <sub>0</sub> |       |
| 骨骼肌系统  | <input type="checkbox"/> <sub>1</sub> | <input type="checkbox"/> <sub>2</sub> | <input type="checkbox"/> <sub>3</sub> | <input type="checkbox"/> <sub>0</sub> |       |
| 淋巴系统   | <input type="checkbox"/> <sub>1</sub> | <input type="checkbox"/> <sub>2</sub> | <input type="checkbox"/> <sub>3</sub> | <input type="checkbox"/> <sub>0</sub> |       |

**有无呼吸道症状**      <sub>0</sub> 未查, 原因 \_\_\_\_\_

检查日期: |\_\_|\_\_|\_\_|年|\_\_|\_\_|月|\_\_|\_\_|日

受试者有无呼吸道症状: <sub>0</sub> 无      <sub>1</sub> 有, 请描述: \_\_\_\_\_

|                   |              |
|-------------------|--------------|
| 研究方案编号: KY2020-29 | 筛选期/治疗期      |
| 研究中心编号  __        | 受试者筛选号  __   |
|                   | 访视 1 (D-3~1) |

| 血常规 <input type="checkbox"/> 未查, 原因 _____ |      |                                                                                                           |                                       |                                       |                                       |                                       |
|-------------------------------------------|------|-----------------------------------------------------------------------------------------------------------|---------------------------------------|---------------------------------------|---------------------------------------|---------------------------------------|
| 采样日期:  __ 年 __ 月 __ 日                     |      |                                                                                                           |                                       | 正常值范围编号:  __                          |                                       |                                       |
| 检查项目                                      | 测量结果 |                                                                                                           | 结果判定                                  |                                       |                                       | 未查                                    |
|                                           | 实测值  | 单位                                                                                                        | 正常                                    | 异常                                    |                                       |                                       |
|                                           |      |                                                                                                           |                                       | 无临床意义                                 | 有临床意义                                 |                                       |
| 红细胞计数 (RBC)                               |      | <input type="checkbox"/> <sub>1</sub> 10 <sup>12</sup> /L <input type="checkbox"/> <sub>2</sub> 其他: _____ | <input type="checkbox"/> <sub>1</sub> | <input type="checkbox"/> <sub>2</sub> | <input type="checkbox"/> <sub>3</sub> | <input type="checkbox"/> <sub>0</sub> |
| 白细胞计数 (WBC)                               |      | <input type="checkbox"/> <sub>1</sub> 10 <sup>9</sup> /L <input type="checkbox"/> <sub>2</sub> 其他: _____  | <input type="checkbox"/> <sub>1</sub> | <input type="checkbox"/> <sub>2</sub> | <input type="checkbox"/> <sub>3</sub> | <input type="checkbox"/> <sub>0</sub> |
| 血红蛋白 (Hb)                                 |      | <input type="checkbox"/> <sub>1</sub> g/L <input type="checkbox"/> <sub>2</sub> 其他: _____                 | <input type="checkbox"/> <sub>1</sub> | <input type="checkbox"/> <sub>2</sub> | <input type="checkbox"/> <sub>3</sub> | <input type="checkbox"/> <sub>0</sub> |
| 血小板计数 (PLT)                               |      | <input type="checkbox"/> <sub>1</sub> 10 <sup>9</sup> /L <input type="checkbox"/> <sub>2</sub> 其他: _____  | <input type="checkbox"/> <sub>1</sub> | <input type="checkbox"/> <sub>2</sub> | <input type="checkbox"/> <sub>3</sub> | <input type="checkbox"/> <sub>0</sub> |
| 中性粒细胞计数 (ANC)                             |      | <input type="checkbox"/> <sub>1</sub> 10 <sup>9</sup> /L <input type="checkbox"/> <sub>2</sub> 其他: _____  | <input type="checkbox"/> <sub>1</sub> | <input type="checkbox"/> <sub>2</sub> | <input type="checkbox"/> <sub>3</sub> | <input type="checkbox"/> <sub>0</sub> |
| 淋巴细胞计数 (LY)                               |      | <input type="checkbox"/> <sub>1</sub> 10 <sup>9</sup> /L <input type="checkbox"/> <sub>2</sub> 其他: _____  | <input type="checkbox"/> <sub>1</sub> | <input type="checkbox"/> <sub>2</sub> | <input type="checkbox"/> <sub>3</sub> | <input type="checkbox"/> <sub>0</sub> |
| 单核细胞计数 (MO)                               |      | <input type="checkbox"/> <sub>1</sub> 10 <sup>9</sup> /L <input type="checkbox"/> <sub>2</sub> 其他: _____  | <input type="checkbox"/> <sub>1</sub> | <input type="checkbox"/> <sub>2</sub> | <input type="checkbox"/> <sub>3</sub> | <input type="checkbox"/> <sub>0</sub> |
| 嗜酸性粒细胞计数 (EO)                             |      | <input type="checkbox"/> <sub>1</sub> 10 <sup>9</sup> /L <input type="checkbox"/> <sub>2</sub> 其他: _____  | <input type="checkbox"/> <sub>1</sub> | <input type="checkbox"/> <sub>2</sub> | <input type="checkbox"/> <sub>3</sub> | <input type="checkbox"/> <sub>0</sub> |
| 嗜碱性粒细胞计数 (BA)                             |      | <input type="checkbox"/> <sub>1</sub> 10 <sup>9</sup> /L <input type="checkbox"/> <sub>2</sub> 其他: _____  | <input type="checkbox"/> <sub>1</sub> | <input type="checkbox"/> <sub>2</sub> | <input type="checkbox"/> <sub>3</sub> | <input type="checkbox"/> <sub>0</sub> |

| 血生化 <input type="checkbox"/> 未查, 原因 _____ |      |                                                                                              |                                       |                                       |                                       |                                       |
|-------------------------------------------|------|----------------------------------------------------------------------------------------------|---------------------------------------|---------------------------------------|---------------------------------------|---------------------------------------|
| 采样日期:  __ 年 __ 月 __ 日                     |      |                                                                                              |                                       | 正常值范围编号:  __                          |                                       |                                       |
| 检查项目                                      | 测量结果 |                                                                                              | 结果判定                                  |                                       |                                       | 未查                                    |
|                                           | 实测值  | 单位                                                                                           | 正常                                    | 异常                                    |                                       |                                       |
|                                           |      |                                                                                              |                                       | 无临床意义                                 | 有临床意义                                 |                                       |
| 谷丙转氨酶 (ALT)                               |      | <input type="checkbox"/> <sub>1</sub> U/L <input type="checkbox"/> <sub>2</sub> 其他: _____    | <input type="checkbox"/> <sub>1</sub> | <input type="checkbox"/> <sub>2</sub> | <input type="checkbox"/> <sub>3</sub> | <input type="checkbox"/> <sub>0</sub> |
| 谷草转氨酶 (AST)                               |      | <input type="checkbox"/> <sub>1</sub> U/L <input type="checkbox"/> <sub>2</sub> 其他: _____    | <input type="checkbox"/> <sub>1</sub> | <input type="checkbox"/> <sub>2</sub> | <input type="checkbox"/> <sub>3</sub> | <input type="checkbox"/> <sub>0</sub> |
| 总胆红素 (TBIL)                               |      | <input type="checkbox"/> <sub>1</sub> μmol/L <input type="checkbox"/> <sub>2</sub> 其他: _____ | <input type="checkbox"/> <sub>1</sub> | <input type="checkbox"/> <sub>2</sub> | <input type="checkbox"/> <sub>3</sub> | <input type="checkbox"/> <sub>0</sub> |
| 白蛋白 (ALB)                                 |      | <input type="checkbox"/> <sub>1</sub> g/L <input type="checkbox"/> <sub>2</sub> 其他: _____    | <input type="checkbox"/> <sub>1</sub> | <input type="checkbox"/> <sub>2</sub> | <input type="checkbox"/> <sub>3</sub> | <input type="checkbox"/> <sub>0</sub> |
| γ-谷氨酰转肽酶 (GGT)                            |      | <input type="checkbox"/> <sub>1</sub> U/L <input type="checkbox"/> <sub>2</sub> 其他: _____    | <input type="checkbox"/> <sub>1</sub> | <input type="checkbox"/> <sub>2</sub> | <input type="checkbox"/> <sub>3</sub> | <input type="checkbox"/> <sub>0</sub> |
| 乳酸脱氢酶 (LDH)                               |      | <input type="checkbox"/> <sub>1</sub> U/L <input type="checkbox"/> <sub>2</sub> 其他: _____    | <input type="checkbox"/> <sub>1</sub> | <input type="checkbox"/> <sub>2</sub> | <input type="checkbox"/> <sub>3</sub> | <input type="checkbox"/> <sub>0</sub> |
| 肌酸激酶 (CK)                                 |      | <input type="checkbox"/> <sub>1</sub> U/L <input type="checkbox"/> <sub>2</sub> 其他: _____    | <input type="checkbox"/> <sub>1</sub> | <input type="checkbox"/> <sub>2</sub> | <input type="checkbox"/> <sub>3</sub> | <input type="checkbox"/> <sub>0</sub> |
| 肌酸激酶同工酶 (CK-MB)                           |      | <input type="checkbox"/> <sub>1</sub> U/L <input type="checkbox"/> <sub>2</sub> 其他: _____    | <input type="checkbox"/> <sub>1</sub> | <input type="checkbox"/> <sub>2</sub> | <input type="checkbox"/> <sub>3</sub> | <input type="checkbox"/> <sub>0</sub> |
| 血尿素氮 (BUN)                                |      | <input type="checkbox"/> <sub>1</sub> mmol/L <input type="checkbox"/> <sub>2</sub> 其他: _____ | <input type="checkbox"/> <sub>1</sub> | <input type="checkbox"/> <sub>2</sub> | <input type="checkbox"/> <sub>3</sub> | <input type="checkbox"/> <sub>0</sub> |
| 尿素 (Urea)                                 |      | <input type="checkbox"/> <sub>1</sub> mmol/L <input type="checkbox"/> <sub>2</sub> 其他: _____ | <input type="checkbox"/> <sub>1</sub> | <input type="checkbox"/> <sub>2</sub> | <input type="checkbox"/> <sub>3</sub> | <input type="checkbox"/> <sub>0</sub> |
| 血肌酐 (CR)                                  |      | <input type="checkbox"/> <sub>1</sub> μmol/L <input type="checkbox"/> <sub>2</sub> 其他: _____ | <input type="checkbox"/> <sub>1</sub> | <input type="checkbox"/> <sub>2</sub> | <input type="checkbox"/> <sub>3</sub> | <input type="checkbox"/> <sub>0</sub> |

|                   |              |
|-------------------|--------------|
| 研究方案编号: KY2020-29 | 筛选期/治疗期      |
| 研究中心编号  __        | 受试者筛选号  __   |
|                   | 访视 1 (D-3~1) |

**尿常规** 未查, 原因\_\_\_\_\_

采样日期: |\_\_|年|\_\_|月|\_\_|日 正常值范围编号: |\_\_|

| 检查项目   | 测量结果 |                                                                        | 结果判定                       |                            |                            | 未查                         |
|--------|------|------------------------------------------------------------------------|----------------------------|----------------------------|----------------------------|----------------------------|
|        | 实测值  | 单位                                                                     | 正常                         | 异常                         |                            |                            |
|        |      |                                                                        |                            | 无临床意义                      | 有临床意义                      |                            |
| 尿蛋白    |      | <input type="checkbox"/> 1 不适用 <input type="checkbox"/> 2 其他: _____    | <input type="checkbox"/> 1 | <input type="checkbox"/> 2 | <input type="checkbox"/> 3 | <input type="checkbox"/> 0 |
| 尿葡萄糖   |      | <input type="checkbox"/> 1 mmol/L <input type="checkbox"/> 2 其他: _____ | <input type="checkbox"/> 1 | <input type="checkbox"/> 2 | <input type="checkbox"/> 3 | <input type="checkbox"/> 0 |
| 尿 PH 值 |      | <input type="checkbox"/> 1 不适用 <input type="checkbox"/> 2 其他: _____    | <input type="checkbox"/> 1 | <input type="checkbox"/> 2 | <input type="checkbox"/> 3 | <input type="checkbox"/> 0 |
| 尿红细胞   |      | <input type="checkbox"/> 1 不适用 <input type="checkbox"/> 2 其他: _____    | <input type="checkbox"/> 1 | <input type="checkbox"/> 2 | <input type="checkbox"/> 3 | <input type="checkbox"/> 0 |
| 尿白细胞   |      | <input type="checkbox"/> 1 不适用 <input type="checkbox"/> 2 其他: _____    | <input type="checkbox"/> 1 | <input type="checkbox"/> 2 | <input type="checkbox"/> 3 | <input type="checkbox"/> 0 |
| 尿酮体    |      | <input type="checkbox"/> 1 不适用 <input type="checkbox"/> 2 其他: _____    | <input type="checkbox"/> 1 | <input type="checkbox"/> 2 | <input type="checkbox"/> 3 | <input type="checkbox"/> 0 |

**凝血功能** 未查, 原因\_\_\_\_\_

采样日期: |\_\_|年|\_\_|月|\_\_|日 正常值范围编号: |\_\_|

| 检查项目              | 测量结果 |                                                                     | 结果判定                       |                            |                            | 未查                         |
|-------------------|------|---------------------------------------------------------------------|----------------------------|----------------------------|----------------------------|----------------------------|
|                   | 实测值  | 单位                                                                  | 正常                         | 异常                         |                            |                            |
|                   |      |                                                                     |                            | 无临床意义                      | 有临床意义                      |                            |
| 凝血酶原时间 (PT)       |      | <input type="checkbox"/> 1 S <input type="checkbox"/> 2 其他: _____   | <input type="checkbox"/> 1 | <input type="checkbox"/> 2 | <input type="checkbox"/> 3 | <input type="checkbox"/> 0 |
| 活化部分凝血活酶时间 (APTT) |      | <input type="checkbox"/> 1 S <input type="checkbox"/> 2 其他: _____   | <input type="checkbox"/> 1 | <input type="checkbox"/> 2 | <input type="checkbox"/> 3 | <input type="checkbox"/> 0 |
| 凝血酶时间 (TT)        |      | <input type="checkbox"/> 1 S <input type="checkbox"/> 2 其他: _____   | <input type="checkbox"/> 1 | <input type="checkbox"/> 2 | <input type="checkbox"/> 3 | <input type="checkbox"/> 0 |
| 血浆纤维蛋白原 (Fbg)     |      | <input type="checkbox"/> 1 g/L <input type="checkbox"/> 2 其他: _____ | <input type="checkbox"/> 1 | <input type="checkbox"/> 2 | <input type="checkbox"/> 3 | <input type="checkbox"/> 0 |
| 国际标准化比率 (INR)     |      | <input type="checkbox"/> 1 不适用 <input type="checkbox"/> 2 其他: _____ | <input type="checkbox"/> 1 | <input type="checkbox"/> 2 | <input type="checkbox"/> 3 | <input type="checkbox"/> 0 |

**C 反应蛋白 (CRP)** 未查, 原因\_\_\_\_\_

采样日期: |\_\_|年|\_\_|月|\_\_|日 正常值范围编号: |\_\_|

| 检查项目         | 测量结果 |                                                                      | 结果判定                       |                            |                            |
|--------------|------|----------------------------------------------------------------------|----------------------------|----------------------------|----------------------------|
|              | 实测值  | 单位                                                                   | 正常                         | 异常                         |                            |
|              |      |                                                                      |                            | 无临床意义                      | 有临床意义                      |
| C 反应蛋白 (CRP) |      | <input type="checkbox"/> 1 mg/L <input type="checkbox"/> 2 其他: _____ | <input type="checkbox"/> 1 | <input type="checkbox"/> 2 | <input type="checkbox"/> 3 |

**血沉 (ESR)** 未查, 原因\_\_\_\_\_

采样日期: |\_\_|年|\_\_|月|\_\_|日 正常值范围编号: |\_\_|

| 检查项目 | 测量结果 |    | 结果判定 |    |
|------|------|----|------|----|
|      | 实测值  | 单位 | 正常   | 异常 |
|      |      |    |      |    |
|      |      |    |      |    |

|                             |                             |
|-----------------------------|-----------------------------|
| 研究方案编号: KY2020-29           | 筛选期/治疗期                     |
| 研究中心编号 <input type="text"/> | 受试者筛选号 <input type="text"/> |
|                             | 访视 1 (D-3~1)                |

|          |                                            |                                                 |                                       |                                       |                                       |
|----------|--------------------------------------------|-------------------------------------------------|---------------------------------------|---------------------------------------|---------------------------------------|
| 血沉 (ESR) |                                            |                                                 |                                       | 无临床意义                                 | 有临床意义                                 |
|          | <input type="checkbox"/> <sub>1</sub> mm/h | <input type="checkbox"/> <sub>2</sub> 其他: _____ | <input type="checkbox"/> <sub>1</sub> | <input type="checkbox"/> <sub>2</sub> | <input type="checkbox"/> <sub>3</sub> |

|                                                                            |      |                                                                                             |                                       |                                       |                                       |
|----------------------------------------------------------------------------|------|---------------------------------------------------------------------------------------------|---------------------------------------|---------------------------------------|---------------------------------------|
| <b>TNF-α</b> <input type="checkbox"/> <sub>0</sub> 未查, 原因 _____            |      |                                                                                             |                                       |                                       |                                       |
| 采样日期: <input type="text"/> 年 <input type="text"/> 月 <input type="text"/> 日 |      |                                                                                             | 正常值范围编号: <input type="text"/>         |                                       |                                       |
| 检查项目                                                                       | 测量结果 |                                                                                             | 结果判定                                  |                                       |                                       |
| TNF-α                                                                      | 实测值  | 单位                                                                                          | 正常                                    | 异常                                    |                                       |
|                                                                            |      | <input type="checkbox"/> <sub>1</sub> pg/mL <input type="checkbox"/> <sub>2</sub> 其他: _____ |                                       | <input type="checkbox"/> <sub>1</sub> | 无临床意义                                 |
|                                                                            |      |                                                                                             | <input type="checkbox"/> <sub>1</sub> | <input type="checkbox"/> <sub>2</sub> | <input type="checkbox"/> <sub>3</sub> |

|                                                                            |      |                                                                                             |                                       |                                       |                                       |
|----------------------------------------------------------------------------|------|---------------------------------------------------------------------------------------------|---------------------------------------|---------------------------------------|---------------------------------------|
| <b>IL-6</b> <input type="checkbox"/> <sub>0</sub> 未查, 原因 _____             |      |                                                                                             |                                       |                                       |                                       |
| 采样日期: <input type="text"/> 年 <input type="text"/> 月 <input type="text"/> 日 |      |                                                                                             | 正常值范围编号: <input type="text"/>         |                                       |                                       |
| 检查项目                                                                       | 测量结果 |                                                                                             | 结果判定                                  |                                       |                                       |
| IL-6                                                                       | 实测值  | 单位                                                                                          | 正常                                    | 异常                                    |                                       |
|                                                                            |      | <input type="checkbox"/> <sub>1</sub> pg/mL <input type="checkbox"/> <sub>2</sub> 其他: _____ |                                       | <input type="checkbox"/> <sub>1</sub> | 无临床意义                                 |
|                                                                            |      |                                                                                             | <input type="checkbox"/> <sub>1</sub> | <input type="checkbox"/> <sub>2</sub> | <input type="checkbox"/> <sub>3</sub> |

|                                                                                                                                            |  |  |                               |  |  |
|--------------------------------------------------------------------------------------------------------------------------------------------|--|--|-------------------------------|--|--|
| <b>尿或血清 HCG (仅适用于育龄女性)</b> <input type="checkbox"/> <sub>0</sub> 未查, 原因 _____                                                              |  |  |                               |  |  |
| <input type="checkbox"/> <sub>1</sub> 不适用 (男性或不具有生育能力的女性)                                                                                  |  |  |                               |  |  |
| 采样日期: <input type="text"/> 年 <input type="text"/> 月 <input type="text"/> 日                                                                 |  |  | 正常值范围编号: <input type="text"/> |  |  |
| 采样类别: <input type="checkbox"/> <sub>1</sub> 血液 <input type="checkbox"/> <sub>2</sub> 尿液                                                    |  |  |                               |  |  |
| 检查结果: <input type="checkbox"/> <sub>1</sub> 阴性 <input type="checkbox"/> <sub>2</sub> 阳性 <input type="checkbox"/> <sub>3</sub> 其他: _____    |  |  |                               |  |  |
| 单位: <input type="checkbox"/> <sub>1</sub> 不适用 <input type="checkbox"/> <sub>2</sub> mIU/mL <input type="checkbox"/> <sub>3</sub> 其他: _____ |  |  |                               |  |  |

|                                                                                                                                            |  |  |  |  |  |
|--------------------------------------------------------------------------------------------------------------------------------------------|--|--|--|--|--|
| <b>12 导联心电图</b> <input type="checkbox"/> <sub>0</sub> 未查, 原因 _____                                                                         |  |  |  |  |  |
| 检查日期: <input type="text"/> 年 <input type="text"/> 月 <input type="text"/> 日                                                                 |  |  |  |  |  |
| 检查结果: <input type="checkbox"/> <sub>1</sub> 正常 <input type="checkbox"/> <sub>2</sub> 异常无临床意义 <input type="checkbox"/> <sub>3</sub> 异常有临床意义 |  |  |  |  |  |
| 若“异常”, 请描述: _____                                                                                                                          |  |  |  |  |  |
| _____                                                                                                                                      |  |  |  |  |  |

|                                                                                                                                            |  |  |  |  |  |
|--------------------------------------------------------------------------------------------------------------------------------------------|--|--|--|--|--|
| <b>胸部 CT</b> <input type="checkbox"/> <sub>0</sub> 未查, 原因 _____                                                                            |  |  |  |  |  |
| 检查日期: <input type="text"/> 年 <input type="text"/> 月 <input type="text"/> 日                                                                 |  |  |  |  |  |
| 检查结果: <input type="checkbox"/> <sub>1</sub> 正常 <input type="checkbox"/> <sub>2</sub> 异常无临床意义 <input type="checkbox"/> <sub>3</sub> 异常有临床意义 |  |  |  |  |  |



|                   |                  |
|-------------------|------------------|
| 研究方案编号: KY2020-29 | 筛选期/治疗期          |
| 研究中心编号  __        | 受试者筛选号  __ __ __ |
| 访视 1 (D-3~1)      |                  |

若异常, 请描述: \_\_\_\_\_

|                                                                     |                                                                                                                                                                                                                            |
|---------------------------------------------------------------------|----------------------------------------------------------------------------------------------------------------------------------------------------------------------------------------------------------------------------|
| <b>新型冠状病毒核酸检测</b> <input type="checkbox"/> <sub>0</sub> 未查, 原因_____ |                                                                                                                                                                                                                            |
| 采样部位 (可多选)                                                          | <input type="checkbox"/> <sub>0</sub> 上呼吸道 <input type="checkbox"/> <sub>1</sub> 下呼吸道                                                                                                                                      |
| 上呼吸道                                                                | 采样日期:  __ __ __ 年 __ __ 月 __ __ 日<br>检查结果: <input type="checkbox"/> <sub>1</sub> 阴性 <input type="checkbox"/> <sub>2</sub> 阳性 <input type="checkbox"/> <sub>3</sub> 无法判断 <input type="checkbox"/> <sub>4</sub> 其他, 请描述_____ |
| 下呼吸道                                                                | 采样日期:  __ __ __ 年 __ __ 月 __ __ 日<br>检查结果: <input type="checkbox"/> <sub>1</sub> 阴性 <input type="checkbox"/> <sub>2</sub> 阳性 <input type="checkbox"/> <sub>3</sub> 无法判断 <input type="checkbox"/> <sub>4</sub> 其他, 请描述_____ |
| 结果判定                                                                | <input type="checkbox"/> <sub>1</sub> 阴性 <input type="checkbox"/> <sub>2</sub> 阳性 <input type="checkbox"/> <sub>3</sub> 无法判断 <input type="checkbox"/> <sub>4</sub> 其他, 请描述_____                                            |

|                                                                          |  |
|--------------------------------------------------------------------------|--|
| <b>指脉氧饱和度 (不吸氧情况下)</b> <input type="checkbox"/> <sub>0</sub> 未查, 原因_____ |  |
| 检查日期:  __ __ __ 年 __ __ 月 __ __ 日                                        |  |
| 实测值: _____% (静息状态)                                                       |  |

|                                                                                                                             |  |
|-----------------------------------------------------------------------------------------------------------------------------|--|
| <b>筛选结果</b>                                                                                                                 |  |
| 受试者是否筛选成功?<br><input type="checkbox"/> <sub>0</sub> 否, 筛选失败的主要原因: _____<br><input type="checkbox"/> <sub>1</sub> 是, 请进行随机化。 |  |
| 随机日期:  __ __ __ 年 __ __ 月 __ __ 日                                                                                           |  |
| 随机编号: _____                                                                                                                 |  |
| 随机分组: <input type="checkbox"/> <sub>1</sub> 试验组 <input type="checkbox"/> <sub>2</sub> 对照组                                   |  |

自签署知情同意书以来, 如有不良事件发生, 请填写“不良事件”表; 如有合并药物治疗, 请填写“既往/合并药物治疗”表; 如有合并非药物治疗, 请填写“既往/合并非药物治疗”表; 如有计划外检查, 请填写“计划外检查”表; 如有 IMV/NIV、ECMO、HFNC、氧疗, 请填写在“IMV/NIV、ECMO、HFNC、氧疗”表中。

|                   |              |
|-------------------|--------------|
| 研究方案编号: KY2020-29 | 治疗期          |
| 研究中心编号  __        | 受试者筛选号  __   |
|                   | 访视 2 (D4±1d) |

本次访视日期: |\_\_|年|\_\_|月|\_\_|日

|                                            |                         |      |                                                                                                                                                                                                                                                                     |
|--------------------------------------------|-------------------------|------|---------------------------------------------------------------------------------------------------------------------------------------------------------------------------------------------------------------------------------------------------------------------|
| 生命体征 <input type="checkbox"/> 未查, 原因 _____ |                         |      |                                                                                                                                                                                                                                                                     |
| 检查日期                                       | __ 年 __ 月 __ 日          |      |                                                                                                                                                                                                                                                                     |
| 日最高体温                                      | __ . __ °C              | 测量方式 | <input type="checkbox"/> <sub>1</sub> 腋下 <input type="checkbox"/> <sub>2</sub> 口腔 <input type="checkbox"/> <sub>3</sub> 肛门<br><input type="checkbox"/> <sub>4</sub> 耳朵 <input type="checkbox"/> <sub>5</sub> 未知 <input type="checkbox"/> <sub>6</sub> 其他, 请描述 _____ |
| 呼吸频率                                       | __ 次/分                  | 脉搏   | __ 次/分                                                                                                                                                                                                                                                              |
| 血压                                         | __ / __  mmHg (收缩压/舒张压) |      |                                                                                                                                                                                                                                                                     |

|                                               |                                                                   |
|-----------------------------------------------|-------------------------------------------------------------------|
| 有无呼吸道症状 <input type="checkbox"/> 未查, 原因 _____ |                                                                   |
| 检查日期:                                         | __ 年 __ 月 __ 日                                                    |
| 受试者有无呼吸道症状:                                   | <input type="checkbox"/> 无 <input type="checkbox"/> 有, 请描述: _____ |

| 血常规 <input type="checkbox"/> 未查, 原因 _____ |                                                                                                           |    |                                       |                                       |                                       |                                       |
|-------------------------------------------|-----------------------------------------------------------------------------------------------------------|----|---------------------------------------|---------------------------------------|---------------------------------------|---------------------------------------|
| 采样日期:  __ 年 __ 月 __ 日                     |                                                                                                           |    | 正常值范围编号:  __                          |                                       |                                       |                                       |
| 检查项目                                      | 测量结果                                                                                                      |    | 结果判定                                  |                                       |                                       | 未查                                    |
|                                           | 实测值                                                                                                       | 单位 | 正常                                    | 异常                                    |                                       |                                       |
|                                           |                                                                                                           |    |                                       | 无临床意义                                 | 有临床意义                                 |                                       |
| 红细胞计数 (RBC)                               | <input type="checkbox"/> <sub>1</sub> 10 <sup>12</sup> /L <input type="checkbox"/> <sub>2</sub> 其他: _____ |    | <input type="checkbox"/> <sub>1</sub> | <input type="checkbox"/> <sub>2</sub> | <input type="checkbox"/> <sub>3</sub> | <input type="checkbox"/> <sub>0</sub> |
| 白细胞计数 (WBC)                               | <input type="checkbox"/> <sub>1</sub> 10 <sup>9</sup> /L <input type="checkbox"/> <sub>2</sub> 其他: _____  |    | <input type="checkbox"/> <sub>1</sub> | <input type="checkbox"/> <sub>2</sub> | <input type="checkbox"/> <sub>3</sub> | <input type="checkbox"/> <sub>0</sub> |
| 血红蛋白 (Hb)                                 | <input type="checkbox"/> <sub>1</sub> g/L <input type="checkbox"/> <sub>2</sub> 其他: _____                 |    | <input type="checkbox"/> <sub>1</sub> | <input type="checkbox"/> <sub>2</sub> | <input type="checkbox"/> <sub>3</sub> | <input type="checkbox"/> <sub>0</sub> |
| 血小板计数 (PLT)                               | <input type="checkbox"/> <sub>1</sub> 10 <sup>9</sup> /L <input type="checkbox"/> <sub>2</sub> 其他: _____  |    | <input type="checkbox"/> <sub>1</sub> | <input type="checkbox"/> <sub>2</sub> | <input type="checkbox"/> <sub>3</sub> | <input type="checkbox"/> <sub>0</sub> |
| 中性粒细胞计数 (ANC)                             | <input type="checkbox"/> <sub>1</sub> 10 <sup>9</sup> /L <input type="checkbox"/> <sub>2</sub> 其他: _____  |    | <input type="checkbox"/> <sub>1</sub> | <input type="checkbox"/> <sub>2</sub> | <input type="checkbox"/> <sub>3</sub> | <input type="checkbox"/> <sub>0</sub> |
| 淋巴细胞计数 (LY)                               | <input type="checkbox"/> <sub>1</sub> 10 <sup>9</sup> /L <input type="checkbox"/> <sub>2</sub> 其他: _____  |    | <input type="checkbox"/> <sub>1</sub> | <input type="checkbox"/> <sub>2</sub> | <input type="checkbox"/> <sub>3</sub> | <input type="checkbox"/> <sub>0</sub> |
| 单核细胞计数 (MO)                               | <input type="checkbox"/> <sub>1</sub> 10 <sup>9</sup> /L <input type="checkbox"/> <sub>2</sub> 其他: _____  |    | <input type="checkbox"/> <sub>1</sub> | <input type="checkbox"/> <sub>2</sub> | <input type="checkbox"/> <sub>3</sub> | <input type="checkbox"/> <sub>0</sub> |
| 嗜酸性粒细胞计数 (EO)                             | <input type="checkbox"/> <sub>1</sub> 10 <sup>9</sup> /L <input type="checkbox"/> <sub>2</sub> 其他: _____  |    | <input type="checkbox"/> <sub>1</sub> | <input type="checkbox"/> <sub>2</sub> | <input type="checkbox"/> <sub>3</sub> | <input type="checkbox"/> <sub>0</sub> |
| 嗜碱性粒细胞计数 (BA)                             | <input type="checkbox"/> <sub>1</sub> 10 <sup>9</sup> /L <input type="checkbox"/> <sub>2</sub> 其他: _____  |    | <input type="checkbox"/> <sub>1</sub> | <input type="checkbox"/> <sub>2</sub> | <input type="checkbox"/> <sub>3</sub> | <input type="checkbox"/> <sub>0</sub> |

| 血生化 <input type="checkbox"/> 未查, 原因 _____ |      |    |              |       |       |    |
|-------------------------------------------|------|----|--------------|-------|-------|----|
| 采样日期:  __ 年 __ 月 __ 日                     |      |    | 正常值范围编号:  __ |       |       |    |
| 检查项目                                      | 测量结果 |    | 结果判定         |       |       | 未查 |
|                                           | 实测值  | 单位 | 正常           | 异常    |       |    |
|                                           |      |    |              | 无临床意义 | 有临床意义 |    |

|                   |                                |
|-------------------|--------------------------------|
| 研究方案编号: KY2020-29 | 治疗期                            |
| 研究中心编号 [ ] [ ]    | 受试者筛选号 [ ] [ ] [ ] [ ] [ ] [ ] |
| 访视 2 (D4±1d)      |                                |

|                 |                                                                                              |                                       |                                       |                                       |                                       |
|-----------------|----------------------------------------------------------------------------------------------|---------------------------------------|---------------------------------------|---------------------------------------|---------------------------------------|
| 谷丙转氨酶 (ALT)     | <input type="checkbox"/> <sub>1</sub> U/L <input type="checkbox"/> <sub>2</sub> 其他: _____    | <input type="checkbox"/> <sub>1</sub> | <input type="checkbox"/> <sub>2</sub> | <input type="checkbox"/> <sub>3</sub> | <input type="checkbox"/> <sub>0</sub> |
| 谷草转氨酶 (AST)     | <input type="checkbox"/> <sub>1</sub> U/L <input type="checkbox"/> <sub>2</sub> 其他: _____    | <input type="checkbox"/> <sub>1</sub> | <input type="checkbox"/> <sub>2</sub> | <input type="checkbox"/> <sub>3</sub> | <input type="checkbox"/> <sub>0</sub> |
| 总胆红素 (TBIL)     | <input type="checkbox"/> <sub>1</sub> μmol/L <input type="checkbox"/> <sub>2</sub> 其他: _____ | <input type="checkbox"/> <sub>1</sub> | <input type="checkbox"/> <sub>2</sub> | <input type="checkbox"/> <sub>3</sub> | <input type="checkbox"/> <sub>0</sub> |
| 白蛋白 (ALB)       | <input type="checkbox"/> <sub>1</sub> g/L <input type="checkbox"/> <sub>2</sub> 其他: _____    | <input type="checkbox"/> <sub>1</sub> | <input type="checkbox"/> <sub>2</sub> | <input type="checkbox"/> <sub>3</sub> | <input type="checkbox"/> <sub>0</sub> |
| γ-谷氨酰转肽酶 (GGT)  | <input type="checkbox"/> <sub>1</sub> U/L <input type="checkbox"/> <sub>2</sub> 其他: _____    | <input type="checkbox"/> <sub>1</sub> | <input type="checkbox"/> <sub>2</sub> | <input type="checkbox"/> <sub>3</sub> | <input type="checkbox"/> <sub>0</sub> |
| 乳酸脱氢酶 (LDH)     | <input type="checkbox"/> <sub>1</sub> U/L <input type="checkbox"/> <sub>2</sub> 其他: _____    | <input type="checkbox"/> <sub>1</sub> | <input type="checkbox"/> <sub>2</sub> | <input type="checkbox"/> <sub>3</sub> | <input type="checkbox"/> <sub>0</sub> |
| 肌酸激酶 (CK)       | <input type="checkbox"/> <sub>1</sub> U/L <input type="checkbox"/> <sub>2</sub> 其他: _____    | <input type="checkbox"/> <sub>1</sub> | <input type="checkbox"/> <sub>2</sub> | <input type="checkbox"/> <sub>3</sub> | <input type="checkbox"/> <sub>0</sub> |
| 肌酸激酶同工酶 (CK-MB) | <input type="checkbox"/> <sub>1</sub> U/L <input type="checkbox"/> <sub>2</sub> 其他: _____    | <input type="checkbox"/> <sub>1</sub> | <input type="checkbox"/> <sub>2</sub> | <input type="checkbox"/> <sub>3</sub> | <input type="checkbox"/> <sub>0</sub> |
| 血尿素氮 (BUN)      | <input type="checkbox"/> <sub>1</sub> mmol/L <input type="checkbox"/> <sub>2</sub> 其他: _____ | <input type="checkbox"/> <sub>1</sub> | <input type="checkbox"/> <sub>2</sub> | <input type="checkbox"/> <sub>3</sub> | <input type="checkbox"/> <sub>0</sub> |
| 尿素 (Urea)       | <input type="checkbox"/> <sub>1</sub> mmol/L <input type="checkbox"/> <sub>2</sub> 其他: _____ | <input type="checkbox"/> <sub>1</sub> | <input type="checkbox"/> <sub>2</sub> | <input type="checkbox"/> <sub>3</sub> | <input type="checkbox"/> <sub>0</sub> |
| 血肌酐 (CR)        | <input type="checkbox"/> <sub>1</sub> μmol/L <input type="checkbox"/> <sub>2</sub> 其他: _____ | <input type="checkbox"/> <sub>1</sub> | <input type="checkbox"/> <sub>2</sub> | <input type="checkbox"/> <sub>3</sub> | <input type="checkbox"/> <sub>0</sub> |

**尿常规** <sub>0</sub> 未查, 原因 \_\_\_\_\_  
<sub>1</sub> 不适用

采样日期: [ ] [ ] [ ] [ ] 年 [ ] [ ] 月 [ ] [ ] 日 正常值范围编号: [ ] [ ] [ ] [ ] [ ] [ ]

| 检查项目   | 测量结果                                                                                         |                                       | 结果判定                                  |                                       |                                       | 未查 |
|--------|----------------------------------------------------------------------------------------------|---------------------------------------|---------------------------------------|---------------------------------------|---------------------------------------|----|
|        | 实测值                                                                                          | 单位                                    | 正常                                    | 异常                                    |                                       |    |
|        |                                                                                              |                                       |                                       | 无临床意义                                 | 有临床意义                                 |    |
| 尿蛋白    | <input type="checkbox"/> <sub>1</sub> 不适用 <input type="checkbox"/> <sub>2</sub> 其他: _____    | <input type="checkbox"/> <sub>1</sub> | <input type="checkbox"/> <sub>2</sub> | <input type="checkbox"/> <sub>3</sub> | <input type="checkbox"/> <sub>0</sub> |    |
| 尿葡萄糖   | <input type="checkbox"/> <sub>1</sub> mmol/L <input type="checkbox"/> <sub>2</sub> 其他: _____ | <input type="checkbox"/> <sub>1</sub> | <input type="checkbox"/> <sub>2</sub> | <input type="checkbox"/> <sub>3</sub> | <input type="checkbox"/> <sub>0</sub> |    |
| 尿 PH 值 | <input type="checkbox"/> <sub>1</sub> 不适用 <input type="checkbox"/> <sub>2</sub> 其他: _____    | <input type="checkbox"/> <sub>1</sub> | <input type="checkbox"/> <sub>2</sub> | <input type="checkbox"/> <sub>3</sub> | <input type="checkbox"/> <sub>0</sub> |    |
| 尿红细胞   | <input type="checkbox"/> <sub>1</sub> 不适用 <input type="checkbox"/> <sub>2</sub> 其他: _____    | <input type="checkbox"/> <sub>1</sub> | <input type="checkbox"/> <sub>2</sub> | <input type="checkbox"/> <sub>3</sub> | <input type="checkbox"/> <sub>0</sub> |    |
| 尿白细胞   | <input type="checkbox"/> <sub>1</sub> 不适用 <input type="checkbox"/> <sub>2</sub> 其他: _____    | <input type="checkbox"/> <sub>1</sub> | <input type="checkbox"/> <sub>2</sub> | <input type="checkbox"/> <sub>3</sub> | <input type="checkbox"/> <sub>0</sub> |    |
| 尿酮体    | <input type="checkbox"/> <sub>1</sub> 不适用 <input type="checkbox"/> <sub>2</sub> 其他: _____    | <input type="checkbox"/> <sub>1</sub> | <input type="checkbox"/> <sub>2</sub> | <input type="checkbox"/> <sub>3</sub> | <input type="checkbox"/> <sub>0</sub> |    |

**凝血功能** <sub>0</sub> 未查, 原因 \_\_\_\_\_

采样日期: [ ] [ ] [ ] [ ] 年 [ ] [ ] 月 [ ] [ ] 日 正常值范围编号: [ ] [ ] [ ] [ ] [ ] [ ]

| 检查项目              | 测量结果                                                                                    |                                       | 结果判定                                  |                                       |                                       | 未查 |
|-------------------|-----------------------------------------------------------------------------------------|---------------------------------------|---------------------------------------|---------------------------------------|---------------------------------------|----|
|                   | 实测值                                                                                     | 单位                                    | 正常                                    | 异常                                    |                                       |    |
|                   |                                                                                         |                                       |                                       | 无临床意义                                 | 有临床意义                                 |    |
| 凝血酶原时间 (PT)       | <input type="checkbox"/> <sub>1</sub> S <input type="checkbox"/> <sub>2</sub> 其他: _____ | <input type="checkbox"/> <sub>1</sub> | <input type="checkbox"/> <sub>2</sub> | <input type="checkbox"/> <sub>3</sub> | <input type="checkbox"/> <sub>0</sub> |    |
| 活化部分凝血活酶时间 (APTT) | <input type="checkbox"/> <sub>1</sub> S <input type="checkbox"/> <sub>2</sub> 其他: _____ | <input type="checkbox"/> <sub>1</sub> | <input type="checkbox"/> <sub>2</sub> | <input type="checkbox"/> <sub>3</sub> | <input type="checkbox"/> <sub>0</sub> |    |

|                   |            |
|-------------------|------------|
| 研究方案编号: KY2020-29 | 治疗期        |
| 研究中心编号  __        | 受试者筛选号  __ |
| 访视 2 (D4±1d)      |            |

|               |                                                                                          |                                       |                                       |                                       |                                       |
|---------------|------------------------------------------------------------------------------------------|---------------------------------------|---------------------------------------|---------------------------------------|---------------------------------------|
| 凝血酶时间 (TT)    | <input type="checkbox"/> <sub>1</sub> S <input type="checkbox"/> <sub>2</sub> 其他: ____   | <input type="checkbox"/> <sub>1</sub> | <input type="checkbox"/> <sub>2</sub> | <input type="checkbox"/> <sub>3</sub> | <input type="checkbox"/> <sub>0</sub> |
| 血浆纤维蛋白原 (Fbg) | <input type="checkbox"/> <sub>1</sub> g/L <input type="checkbox"/> <sub>2</sub> 其他: ____ | <input type="checkbox"/> <sub>1</sub> | <input type="checkbox"/> <sub>2</sub> | <input type="checkbox"/> <sub>3</sub> | <input type="checkbox"/> <sub>0</sub> |
| 国际标准化比率 (INR) | <input type="checkbox"/> <sub>1</sub> 不适用 <input type="checkbox"/> <sub>2</sub> 其他: ____ | <input type="checkbox"/> <sub>1</sub> | <input type="checkbox"/> <sub>2</sub> | <input type="checkbox"/> <sub>3</sub> | <input type="checkbox"/> <sub>0</sub> |

| <b>C 反应蛋白 (CRP)</b> <input type="checkbox"/> <sub>0</sub> 未查, 原因_____ |      |                                                                                           |                                       |                                       |                                       |
|-----------------------------------------------------------------------|------|-------------------------------------------------------------------------------------------|---------------------------------------|---------------------------------------|---------------------------------------|
| 采样日期:  __ 年 __ 月 __ 日                                                 |      |                                                                                           | 正常值范围编号:  __                          |                                       |                                       |
| 检查项目                                                                  | 测量结果 |                                                                                           | 结果判定                                  |                                       |                                       |
| C 反应蛋白 (CRP)                                                          | 实测值  | 单位                                                                                        | 正常                                    | 异常                                    |                                       |
|                                                                       |      |                                                                                           |                                       | 无临床意义                                 | 有临床意义                                 |
|                                                                       |      | <input type="checkbox"/> <sub>1</sub> mg/L <input type="checkbox"/> <sub>2</sub> 其他: ____ | <input type="checkbox"/> <sub>1</sub> | <input type="checkbox"/> <sub>2</sub> | <input type="checkbox"/> <sub>3</sub> |

| <b>血沉 (ESR)</b> <input type="checkbox"/> <sub>0</sub> 未查, 原因_____ |      |                                                                                           |                                       |                                       |                                       |
|-------------------------------------------------------------------|------|-------------------------------------------------------------------------------------------|---------------------------------------|---------------------------------------|---------------------------------------|
| 采样日期:  __ 年 __ 月 __ 日                                             |      |                                                                                           | 正常值范围编号:  __                          |                                       |                                       |
| 检查项目                                                              | 测量结果 |                                                                                           | 结果判定                                  |                                       |                                       |
| 血沉 (ESR)                                                          | 实测值  | 单位                                                                                        | 正常                                    | 异常                                    |                                       |
|                                                                   |      |                                                                                           |                                       | 无临床意义                                 | 有临床意义                                 |
|                                                                   |      | <input type="checkbox"/> <sub>1</sub> mm/h <input type="checkbox"/> <sub>2</sub> 其他: ____ | <input type="checkbox"/> <sub>1</sub> | <input type="checkbox"/> <sub>2</sub> | <input type="checkbox"/> <sub>3</sub> |

| <b>TNF-α</b> <input type="checkbox"/> <sub>0</sub> 未查, 原因_____ |      |                                                                                            |                                       |                                       |                                       |
|----------------------------------------------------------------|------|--------------------------------------------------------------------------------------------|---------------------------------------|---------------------------------------|---------------------------------------|
| 采样日期:  __ 年 __ 月 __ 日                                          |      |                                                                                            | 正常值范围编号:  __                          |                                       |                                       |
| 检查项目                                                           | 测量结果 |                                                                                            | 结果判定                                  |                                       |                                       |
| TNF-α                                                          | 实测值  | 单位                                                                                         | 正常                                    | 异常                                    |                                       |
|                                                                |      |                                                                                            |                                       | 无临床意义                                 | 有临床意义                                 |
|                                                                |      | <input type="checkbox"/> <sub>1</sub> pg/mL <input type="checkbox"/> <sub>2</sub> 其他: ____ | <input type="checkbox"/> <sub>1</sub> | <input type="checkbox"/> <sub>2</sub> | <input type="checkbox"/> <sub>3</sub> |

| <b>IL-6</b> <input type="checkbox"/> <sub>0</sub> 未查, 原因_____ |      |                                                                                            |                                       |                                       |                                       |
|---------------------------------------------------------------|------|--------------------------------------------------------------------------------------------|---------------------------------------|---------------------------------------|---------------------------------------|
| 采样日期:  __ 年 __ 月 __ 日                                         |      |                                                                                            | 正常值范围编号:  __                          |                                       |                                       |
| 检查项目                                                          | 测量结果 |                                                                                            | 结果判定                                  |                                       |                                       |
| IL-6                                                          | 实测值  | 单位                                                                                         | 正常                                    | 异常                                    |                                       |
|                                                               |      |                                                                                            |                                       | 无临床意义                                 | 有临床意义                                 |
|                                                               |      | <input type="checkbox"/> <sub>1</sub> pg/mL <input type="checkbox"/> <sub>2</sub> 其他: ____ | <input type="checkbox"/> <sub>1</sub> | <input type="checkbox"/> <sub>2</sub> | <input type="checkbox"/> <sub>3</sub> |

|                   |                  |
|-------------------|------------------|
| 研究方案编号: KY2020-29 | 治疗期              |
| 研究中心编号  __        | 受试者筛选号  __ __ __ |
| 访视 2 (D4±1d)      |                  |

|                                                                     |                                                                                                                                                                                                                            |
|---------------------------------------------------------------------|----------------------------------------------------------------------------------------------------------------------------------------------------------------------------------------------------------------------------|
| <b>新型冠状病毒核酸检测</b> <input type="checkbox"/> <sub>0</sub> 未查, 原因_____ |                                                                                                                                                                                                                            |
| 采样部位 (可多选)                                                          | <input type="checkbox"/> <sub>0</sub> 上呼吸道 <input type="checkbox"/> <sub>1</sub> 下呼吸道                                                                                                                                      |
| 上呼吸道                                                                | 采样日期:  __ __ __ 年 __ __ 月 __ __ 日<br>检查结果: <input type="checkbox"/> <sub>1</sub> 阴性 <input type="checkbox"/> <sub>2</sub> 阳性 <input type="checkbox"/> <sub>3</sub> 无法判断 <input type="checkbox"/> <sub>4</sub> 其他, 请描述_____ |
| 下呼吸道                                                                | 采样日期:  __ __ __ 年 __ __ 月 __ __ 日<br>检查结果: <input type="checkbox"/> <sub>1</sub> 阴性 <input type="checkbox"/> <sub>2</sub> 阳性 <input type="checkbox"/> <sub>3</sub> 无法判断 <input type="checkbox"/> <sub>4</sub> 其他, 请描述_____ |
| 结果判定                                                                | <input type="checkbox"/> <sub>1</sub> 阴性 <input type="checkbox"/> <sub>2</sub> 阳性 <input type="checkbox"/> <sub>3</sub> 无法判断 <input type="checkbox"/> <sub>4</sub> 其他, 请描述_____                                            |

|                                                                          |
|--------------------------------------------------------------------------|
| <b>指脉氧饱和度 (不吸氧情况下)</b> <input type="checkbox"/> <sub>0</sub> 未查, 原因_____ |
| 检查日期:  __ __ __ 年 __ __ 月 __ __ 日                                        |
| 实测值: _____% (静息状态)                                                       |

|                                                                                                                                                                                         |
|-----------------------------------------------------------------------------------------------------------------------------------------------------------------------------------------|
| <b>是否转成重型/危重型肺炎</b> <input type="checkbox"/> <sub>0</sub> 未评价      评价日期 __ __ __ 年 __ __ 月 __ __ 日                                                                                      |
| 是否转成重型/危重型肺炎: <input type="checkbox"/> <sub>0</sub> 否 <input type="checkbox"/> <sub>1</sub> 是, 临床分型: <input type="checkbox"/> <sub>1</sub> 重型 <input type="checkbox"/> <sub>2</sub> 危重型 |
| 转成重型/危重型肺炎日期:  __ __ __ 年 __ __ 月 __ __ 日                                                                                                                                               |

自上次访视以来, 受试者如有不良事件发生, 请填写“不良事件”表; 如有合并药物治疗, 请填写“既往/合并药物治疗”表; 如有合并非药物治疗, 请填写“既往/合并非药物治疗”表; 如有计划外检查, 请填写“计划外检查”表; 如有 IMV/NIV、ECMO、HFNC、氧疗, 请填写在“IMV/NIV、ECMO、HFNC、氧疗”表中。

|                   |              |
|-------------------|--------------|
| 研究方案编号: KY2020-29 | 治疗期          |
| 研究中心编号  __        | 受试者筛选号  __   |
|                   | 访视 3 (D7±1d) |

本次访视日期: |\_\_|年|\_\_|月|\_\_|日

|                                            |                         |      |                                                                                                                                                                                                                                                                     |
|--------------------------------------------|-------------------------|------|---------------------------------------------------------------------------------------------------------------------------------------------------------------------------------------------------------------------------------------------------------------------|
| 生命体征 <input type="checkbox"/> 未查, 原因 _____ |                         |      |                                                                                                                                                                                                                                                                     |
| 检查日期                                       | __ 年 __ 月 __ 日          |      |                                                                                                                                                                                                                                                                     |
| 日最高体温                                      | __ . __ °C              | 测量方式 | <input type="checkbox"/> <sub>1</sub> 腋下 <input type="checkbox"/> <sub>2</sub> 口腔 <input type="checkbox"/> <sub>3</sub> 肛门<br><input type="checkbox"/> <sub>4</sub> 耳朵 <input type="checkbox"/> <sub>5</sub> 未知 <input type="checkbox"/> <sub>6</sub> 其他, 请描述 _____ |
| 呼吸频率                                       | __ 次/分                  | 脉搏   | __ 次/分                                                                                                                                                                                                                                                              |
| 血压                                         | __ / __  mmHg (收缩压/舒张压) |      |                                                                                                                                                                                                                                                                     |

|                                               |                                                                   |
|-----------------------------------------------|-------------------------------------------------------------------|
| 有无呼吸道症状 <input type="checkbox"/> 未查, 原因 _____ |                                                                   |
| 检查日期:                                         | __ 年 __ 月 __ 日                                                    |
| 受试者有无呼吸道症状:                                   | <input type="checkbox"/> 无 <input type="checkbox"/> 有, 请描述: _____ |

| 血常规 <input type="checkbox"/> 未查, 原因 _____ |                                                                                                           |    |                                       |                                       |                                       |                                       |
|-------------------------------------------|-----------------------------------------------------------------------------------------------------------|----|---------------------------------------|---------------------------------------|---------------------------------------|---------------------------------------|
| 采样日期:  __ 年 __ 月 __ 日                     |                                                                                                           |    | 正常值范围编号:  __                          |                                       |                                       |                                       |
| 检查项目                                      | 测量结果                                                                                                      |    | 结果判定                                  |                                       |                                       | 未查                                    |
|                                           | 实测值                                                                                                       | 单位 | 正常                                    | 异常                                    |                                       |                                       |
|                                           |                                                                                                           |    |                                       | 无临床意义                                 | 有临床意义                                 |                                       |
| 红细胞计数 (RBC)                               | <input type="checkbox"/> <sub>1</sub> 10 <sup>12</sup> /L <input type="checkbox"/> <sub>2</sub> 其他: _____ |    | <input type="checkbox"/> <sub>1</sub> | <input type="checkbox"/> <sub>2</sub> | <input type="checkbox"/> <sub>3</sub> | <input type="checkbox"/> <sub>0</sub> |
| 白细胞计数 (WBC)                               | <input type="checkbox"/> <sub>1</sub> 10 <sup>9</sup> /L <input type="checkbox"/> <sub>2</sub> 其他: _____  |    | <input type="checkbox"/> <sub>1</sub> | <input type="checkbox"/> <sub>2</sub> | <input type="checkbox"/> <sub>3</sub> | <input type="checkbox"/> <sub>0</sub> |
| 血红蛋白 (Hb)                                 | <input type="checkbox"/> <sub>1</sub> g/L <input type="checkbox"/> <sub>2</sub> 其他: _____                 |    | <input type="checkbox"/> <sub>1</sub> | <input type="checkbox"/> <sub>2</sub> | <input type="checkbox"/> <sub>3</sub> | <input type="checkbox"/> <sub>0</sub> |
| 血小板计数 (PLT)                               | <input type="checkbox"/> <sub>1</sub> 10 <sup>9</sup> /L <input type="checkbox"/> <sub>2</sub> 其他: _____  |    | <input type="checkbox"/> <sub>1</sub> | <input type="checkbox"/> <sub>2</sub> | <input type="checkbox"/> <sub>3</sub> | <input type="checkbox"/> <sub>0</sub> |
| 中性粒细胞计数 (ANC)                             | <input type="checkbox"/> <sub>1</sub> 10 <sup>9</sup> /L <input type="checkbox"/> <sub>2</sub> 其他: _____  |    | <input type="checkbox"/> <sub>1</sub> | <input type="checkbox"/> <sub>2</sub> | <input type="checkbox"/> <sub>3</sub> | <input type="checkbox"/> <sub>0</sub> |
| 淋巴细胞计数 (LY)                               | <input type="checkbox"/> <sub>1</sub> 10 <sup>9</sup> /L <input type="checkbox"/> <sub>2</sub> 其他: _____  |    | <input type="checkbox"/> <sub>1</sub> | <input type="checkbox"/> <sub>2</sub> | <input type="checkbox"/> <sub>3</sub> | <input type="checkbox"/> <sub>0</sub> |
| 单核细胞计数 (MO)                               | <input type="checkbox"/> <sub>1</sub> 10 <sup>9</sup> /L <input type="checkbox"/> <sub>2</sub> 其他: _____  |    | <input type="checkbox"/> <sub>1</sub> | <input type="checkbox"/> <sub>2</sub> | <input type="checkbox"/> <sub>3</sub> | <input type="checkbox"/> <sub>0</sub> |
| 嗜酸性粒细胞计数 (EO)                             | <input type="checkbox"/> <sub>1</sub> 10 <sup>9</sup> /L <input type="checkbox"/> <sub>2</sub> 其他: _____  |    | <input type="checkbox"/> <sub>1</sub> | <input type="checkbox"/> <sub>2</sub> | <input type="checkbox"/> <sub>3</sub> | <input type="checkbox"/> <sub>0</sub> |
| 嗜碱性粒细胞计数 (BA)                             | <input type="checkbox"/> <sub>1</sub> 10 <sup>9</sup> /L <input type="checkbox"/> <sub>2</sub> 其他: _____  |    | <input type="checkbox"/> <sub>1</sub> | <input type="checkbox"/> <sub>2</sub> | <input type="checkbox"/> <sub>3</sub> | <input type="checkbox"/> <sub>0</sub> |

| 血生化 <input type="checkbox"/> 未查, 原因 _____ |      |    |              |       |       |    |
|-------------------------------------------|------|----|--------------|-------|-------|----|
| 采样日期:  __ 年 __ 月 __ 日                     |      |    | 正常值范围编号:  __ |       |       |    |
| 检查项目                                      | 测量结果 |    | 结果判定         |       |       | 未查 |
|                                           | 实测值  | 单位 | 正常           | 异常    |       |    |
|                                           |      |    |              | 无临床意义 | 有临床意义 |    |

|                             |                             |
|-----------------------------|-----------------------------|
| 研究方案编号: KY2020-29           | 治疗期                         |
| 研究中心编号 <input type="text"/> | 受试者筛选号 <input type="text"/> |
| 访视 3 (D7±1d)                |                             |

|                 |                                                                                              |                                       |                                       |                                       |                                       |
|-----------------|----------------------------------------------------------------------------------------------|---------------------------------------|---------------------------------------|---------------------------------------|---------------------------------------|
| 谷丙转氨酶 (ALT)     | <input type="checkbox"/> <sub>1</sub> U/L <input type="checkbox"/> <sub>2</sub> 其他: _____    | <input type="checkbox"/> <sub>1</sub> | <input type="checkbox"/> <sub>2</sub> | <input type="checkbox"/> <sub>3</sub> | <input type="checkbox"/> <sub>0</sub> |
| 谷草转氨酶 (AST)     | <input type="checkbox"/> <sub>1</sub> U/L <input type="checkbox"/> <sub>2</sub> 其他: _____    | <input type="checkbox"/> <sub>1</sub> | <input type="checkbox"/> <sub>2</sub> | <input type="checkbox"/> <sub>3</sub> | <input type="checkbox"/> <sub>0</sub> |
| 总胆红素 (TBIL)     | <input type="checkbox"/> <sub>1</sub> μmol/L <input type="checkbox"/> <sub>2</sub> 其他: _____ | <input type="checkbox"/> <sub>1</sub> | <input type="checkbox"/> <sub>2</sub> | <input type="checkbox"/> <sub>3</sub> | <input type="checkbox"/> <sub>0</sub> |
| 白蛋白 (ALB)       | <input type="checkbox"/> <sub>1</sub> g/L <input type="checkbox"/> <sub>2</sub> 其他: _____    | <input type="checkbox"/> <sub>1</sub> | <input type="checkbox"/> <sub>2</sub> | <input type="checkbox"/> <sub>3</sub> | <input type="checkbox"/> <sub>0</sub> |
| γ-谷氨酰转肽酶 (GGT)  | <input type="checkbox"/> <sub>1</sub> U/L <input type="checkbox"/> <sub>2</sub> 其他: _____    | <input type="checkbox"/> <sub>1</sub> | <input type="checkbox"/> <sub>2</sub> | <input type="checkbox"/> <sub>3</sub> | <input type="checkbox"/> <sub>0</sub> |
| 乳酸脱氢酶 (LDH)     | <input type="checkbox"/> <sub>1</sub> U/L <input type="checkbox"/> <sub>2</sub> 其他: _____    | <input type="checkbox"/> <sub>1</sub> | <input type="checkbox"/> <sub>2</sub> | <input type="checkbox"/> <sub>3</sub> | <input type="checkbox"/> <sub>0</sub> |
| 肌酸激酶 (CK)       | <input type="checkbox"/> <sub>1</sub> U/L <input type="checkbox"/> <sub>2</sub> 其他: _____    | <input type="checkbox"/> <sub>1</sub> | <input type="checkbox"/> <sub>2</sub> | <input type="checkbox"/> <sub>3</sub> | <input type="checkbox"/> <sub>0</sub> |
| 肌酸激酶同工酶 (CK-MB) | <input type="checkbox"/> <sub>1</sub> U/L <input type="checkbox"/> <sub>2</sub> 其他: _____    | <input type="checkbox"/> <sub>1</sub> | <input type="checkbox"/> <sub>2</sub> | <input type="checkbox"/> <sub>3</sub> | <input type="checkbox"/> <sub>0</sub> |
| 血尿素氮 (BUN)      | <input type="checkbox"/> <sub>1</sub> mmol/L <input type="checkbox"/> <sub>2</sub> 其他: _____ | <input type="checkbox"/> <sub>1</sub> | <input type="checkbox"/> <sub>2</sub> | <input type="checkbox"/> <sub>3</sub> | <input type="checkbox"/> <sub>0</sub> |
| 尿素 (Urea)       | <input type="checkbox"/> <sub>1</sub> mmol/L <input type="checkbox"/> <sub>2</sub> 其他: _____ | <input type="checkbox"/> <sub>1</sub> | <input type="checkbox"/> <sub>2</sub> | <input type="checkbox"/> <sub>3</sub> | <input type="checkbox"/> <sub>0</sub> |
| 血肌酐 (CR)        | <input type="checkbox"/> <sub>1</sub> μmol/L <input type="checkbox"/> <sub>2</sub> 其他: _____ | <input type="checkbox"/> <sub>1</sub> | <input type="checkbox"/> <sub>2</sub> | <input type="checkbox"/> <sub>3</sub> | <input type="checkbox"/> <sub>0</sub> |

尿常规 <sub>0</sub> 未查, 原因 \_\_\_\_\_  
<sub>1</sub> 不适用

采样日期: 年月日 正常值范围编号:

| 检查项目   | 测量结果                                                                                         |                                       | 结果判定                                  |                                       |                                       | 未查 |
|--------|----------------------------------------------------------------------------------------------|---------------------------------------|---------------------------------------|---------------------------------------|---------------------------------------|----|
|        | 实测值                                                                                          | 单位                                    | 正常                                    | 异常                                    |                                       |    |
|        |                                                                                              |                                       |                                       | 无临床意义                                 | 有临床意义                                 |    |
| 尿蛋白    | <input type="checkbox"/> <sub>1</sub> 不适用 <input type="checkbox"/> <sub>2</sub> 其他: _____    | <input type="checkbox"/> <sub>1</sub> | <input type="checkbox"/> <sub>2</sub> | <input type="checkbox"/> <sub>3</sub> | <input type="checkbox"/> <sub>0</sub> |    |
| 尿葡萄糖   | <input type="checkbox"/> <sub>1</sub> mmol/L <input type="checkbox"/> <sub>2</sub> 其他: _____ | <input type="checkbox"/> <sub>1</sub> | <input type="checkbox"/> <sub>2</sub> | <input type="checkbox"/> <sub>3</sub> | <input type="checkbox"/> <sub>0</sub> |    |
| 尿 PH 值 | <input type="checkbox"/> <sub>1</sub> 不适用 <input type="checkbox"/> <sub>2</sub> 其他: _____    | <input type="checkbox"/> <sub>1</sub> | <input type="checkbox"/> <sub>2</sub> | <input type="checkbox"/> <sub>3</sub> | <input type="checkbox"/> <sub>0</sub> |    |
| 尿红细胞   | <input type="checkbox"/> <sub>1</sub> 不适用 <input type="checkbox"/> <sub>2</sub> 其他: _____    | <input type="checkbox"/> <sub>1</sub> | <input type="checkbox"/> <sub>2</sub> | <input type="checkbox"/> <sub>3</sub> | <input type="checkbox"/> <sub>0</sub> |    |
| 尿白细胞   | <input type="checkbox"/> <sub>1</sub> 不适用 <input type="checkbox"/> <sub>2</sub> 其他: _____    | <input type="checkbox"/> <sub>1</sub> | <input type="checkbox"/> <sub>2</sub> | <input type="checkbox"/> <sub>3</sub> | <input type="checkbox"/> <sub>0</sub> |    |
| 尿酮体    | <input type="checkbox"/> <sub>1</sub> 不适用 <input type="checkbox"/> <sub>2</sub> 其他: _____    | <input type="checkbox"/> <sub>1</sub> | <input type="checkbox"/> <sub>2</sub> | <input type="checkbox"/> <sub>3</sub> | <input type="checkbox"/> <sub>0</sub> |    |

凝血功能 <sub>0</sub> 未查, 原因 \_\_\_\_\_

采样日期: 年月日 正常值范围编号:

| 检查项目              | 测量结果                                                                                    |                                       | 结果判定                                  |                                       |                                       | 未查 |
|-------------------|-----------------------------------------------------------------------------------------|---------------------------------------|---------------------------------------|---------------------------------------|---------------------------------------|----|
|                   | 实测值                                                                                     | 单位                                    | 正常                                    | 异常                                    |                                       |    |
|                   |                                                                                         |                                       |                                       | 无临床意义                                 | 有临床意义                                 |    |
| 凝血酶原时间 (PT)       | <input type="checkbox"/> <sub>1</sub> S <input type="checkbox"/> <sub>2</sub> 其他: _____ | <input type="checkbox"/> <sub>1</sub> | <input type="checkbox"/> <sub>2</sub> | <input type="checkbox"/> <sub>3</sub> | <input type="checkbox"/> <sub>0</sub> |    |
| 活化部分凝血活酶时间 (APTT) | <input type="checkbox"/> <sub>1</sub> S <input type="checkbox"/> <sub>2</sub> 其他: _____ | <input type="checkbox"/> <sub>1</sub> | <input type="checkbox"/> <sub>2</sub> | <input type="checkbox"/> <sub>3</sub> | <input type="checkbox"/> <sub>0</sub> |    |

|                   |            |
|-------------------|------------|
| 研究方案编号: KY2020-29 | 治疗期        |
| 研究中心编号  __        | 受试者筛选号  __ |
| 访视 3 (D7±1d)      |            |

|               |                                                                                          |                                       |                                       |                                       |                                       |
|---------------|------------------------------------------------------------------------------------------|---------------------------------------|---------------------------------------|---------------------------------------|---------------------------------------|
| 凝血酶时间 (TT)    | <input type="checkbox"/> <sub>1</sub> S <input type="checkbox"/> <sub>2</sub> 其他: ____   | <input type="checkbox"/> <sub>1</sub> | <input type="checkbox"/> <sub>2</sub> | <input type="checkbox"/> <sub>3</sub> | <input type="checkbox"/> <sub>0</sub> |
| 血浆纤维蛋白原 (Fbg) | <input type="checkbox"/> <sub>1</sub> g/L <input type="checkbox"/> <sub>2</sub> 其他: ____ | <input type="checkbox"/> <sub>1</sub> | <input type="checkbox"/> <sub>2</sub> | <input type="checkbox"/> <sub>3</sub> | <input type="checkbox"/> <sub>0</sub> |
| 国际标准化比率 (INR) | <input type="checkbox"/> <sub>1</sub> 不适用 <input type="checkbox"/> <sub>2</sub> 其他: ____ | <input type="checkbox"/> <sub>1</sub> | <input type="checkbox"/> <sub>2</sub> | <input type="checkbox"/> <sub>3</sub> | <input type="checkbox"/> <sub>0</sub> |

| <b>C 反应蛋白 (CRP)</b> <input type="checkbox"/> <sub>0</sub> 未查, 原因 _____ |      |                                                                                           |                                       |                                       |                                       |
|------------------------------------------------------------------------|------|-------------------------------------------------------------------------------------------|---------------------------------------|---------------------------------------|---------------------------------------|
| 采样日期:  __ 年 __ 月 __ 日                                                  |      |                                                                                           | 正常值范围编号:  __                          |                                       |                                       |
| 检查项目                                                                   | 测量结果 |                                                                                           | 结果判定                                  |                                       |                                       |
| C 反应蛋白 (CRP)                                                           | 实测值  | 单位                                                                                        | 正常                                    | 异常                                    |                                       |
|                                                                        |      |                                                                                           |                                       | 无临床意义                                 | 有临床意义                                 |
|                                                                        |      | <input type="checkbox"/> <sub>1</sub> mg/L <input type="checkbox"/> <sub>2</sub> 其他: ____ | <input type="checkbox"/> <sub>1</sub> | <input type="checkbox"/> <sub>2</sub> | <input type="checkbox"/> <sub>3</sub> |

| <b>血沉 (ESR)</b> <input type="checkbox"/> <sub>0</sub> 未查, 原因 _____ |      |                                                                                           |                                       |                                       |                                       |
|--------------------------------------------------------------------|------|-------------------------------------------------------------------------------------------|---------------------------------------|---------------------------------------|---------------------------------------|
| 采样日期:  __ 年 __ 月 __ 日                                              |      |                                                                                           | 正常值范围编号:  __                          |                                       |                                       |
| 检查项目                                                               | 测量结果 |                                                                                           | 结果判定                                  |                                       |                                       |
| 血沉 (ESR)                                                           | 实测值  | 单位                                                                                        | 正常                                    | 异常                                    |                                       |
|                                                                    |      |                                                                                           |                                       | 无临床意义                                 | 有临床意义                                 |
|                                                                    |      | <input type="checkbox"/> <sub>1</sub> mm/h <input type="checkbox"/> <sub>2</sub> 其他: ____ | <input type="checkbox"/> <sub>1</sub> | <input type="checkbox"/> <sub>2</sub> | <input type="checkbox"/> <sub>3</sub> |

| <b>TNF-α</b> <input type="checkbox"/> <sub>0</sub> 未查, 原因 _____ |      |                                                                                            |                                       |                                       |                                       |
|-----------------------------------------------------------------|------|--------------------------------------------------------------------------------------------|---------------------------------------|---------------------------------------|---------------------------------------|
| 采样日期:  __ 年 __ 月 __ 日                                           |      |                                                                                            | 正常值范围编号:  __                          |                                       |                                       |
| 检查项目                                                            | 测量结果 |                                                                                            | 结果判定                                  |                                       |                                       |
| TNF-α                                                           | 实测值  | 单位                                                                                         | 正常                                    | 异常                                    |                                       |
|                                                                 |      |                                                                                            |                                       | 无临床意义                                 | 有临床意义                                 |
|                                                                 |      | <input type="checkbox"/> <sub>1</sub> pg/mL <input type="checkbox"/> <sub>2</sub> 其他: ____ | <input type="checkbox"/> <sub>1</sub> | <input type="checkbox"/> <sub>2</sub> | <input type="checkbox"/> <sub>3</sub> |

| <b>IL-6</b> <input type="checkbox"/> <sub>0</sub> 未查, 原因 _____ |      |                                                                                            |                                       |                                       |                                       |
|----------------------------------------------------------------|------|--------------------------------------------------------------------------------------------|---------------------------------------|---------------------------------------|---------------------------------------|
| 采样日期:  __ 年 __ 月 __ 日                                          |      |                                                                                            | 正常值范围编号:  __                          |                                       |                                       |
| 检查项目                                                           | 测量结果 |                                                                                            | 结果判定                                  |                                       |                                       |
| IL-6                                                           | 实测值  | 单位                                                                                         | 正常                                    | 异常                                    |                                       |
|                                                                |      |                                                                                            |                                       | 无临床意义                                 | 有临床意义                                 |
|                                                                |      | <input type="checkbox"/> <sub>1</sub> pg/mL <input type="checkbox"/> <sub>2</sub> 其他: ____ | <input type="checkbox"/> <sub>1</sub> | <input type="checkbox"/> <sub>2</sub> | <input type="checkbox"/> <sub>3</sub> |



|                   |            |
|-------------------|------------|
| 研究方案编号: KY2020-29 | 治疗期        |
| 研究中心编号  __        | 受试者筛选号  __ |
| 访视 3 (D7±1d)      |            |

|                                                                     |                                                                                                                                                                                                                        |
|---------------------------------------------------------------------|------------------------------------------------------------------------------------------------------------------------------------------------------------------------------------------------------------------------|
| <b>新型冠状病毒核酸检测</b> <input type="checkbox"/> <sub>0</sub> 未查, 原因_____ |                                                                                                                                                                                                                        |
| 采样部位 (可多选)                                                          | <input type="checkbox"/> <sub>0</sub> 上呼吸道 <input type="checkbox"/> <sub>1</sub> 下呼吸道                                                                                                                                  |
| 上呼吸道                                                                | 采样日期:  __ _ _ 年 __ _ 月 __ _ 日<br>检查结果: <input type="checkbox"/> <sub>1</sub> 阴性 <input type="checkbox"/> <sub>2</sub> 阳性 <input type="checkbox"/> <sub>3</sub> 无法判断 <input type="checkbox"/> <sub>4</sub> 其他, 请描述_____ |
| 下呼吸道                                                                | 采样日期:  __ _ _ 年 __ _ 月 __ _ 日<br>检查结果: <input type="checkbox"/> <sub>1</sub> 阴性 <input type="checkbox"/> <sub>2</sub> 阳性 <input type="checkbox"/> <sub>3</sub> 无法判断 <input type="checkbox"/> <sub>4</sub> 其他, 请描述_____ |
| 结果判定                                                                | <input type="checkbox"/> <sub>1</sub> 阴性 <input type="checkbox"/> <sub>2</sub> 阳性 <input type="checkbox"/> <sub>3</sub> 无法判断 <input type="checkbox"/> <sub>4</sub> 其他, 请描述_____                                        |

|                                                                          |
|--------------------------------------------------------------------------|
| <b>指脉氧饱和度 (不吸氧情况下)</b> <input type="checkbox"/> <sub>0</sub> 未查, 原因_____ |
| 检查日期:  __ _ _ 年 __ _ 月 __ _ 日                                            |
| 实测值: _____% (静息状态)                                                       |

|                                                                                                                                                                                         |
|-----------------------------------------------------------------------------------------------------------------------------------------------------------------------------------------|
| <b>是否转成重型/危重型肺炎</b> <input type="checkbox"/> <sub>0</sub> 未评价      评价日期 __ _ _ 年 __ _ 月 __ _ 日                                                                                          |
| 是否转成重型/危重型肺炎: <input type="checkbox"/> <sub>0</sub> 否 <input type="checkbox"/> <sub>1</sub> 是, 临床分型: <input type="checkbox"/> <sub>1</sub> 重型 <input type="checkbox"/> <sub>2</sub> 危重型 |
| 转成重型/危重型肺炎日期:  __ _ _ 年 __ _ 月 __ _ 日                                                                                                                                                   |

自上次访视以来, 受试者如有不良事件发生, 请填写“不良事件”表; 如有合并药物治疗, 请填写“既往/合并药物治疗”表; 如有合并非药物治疗, 请填写“既往/合并非药物治疗”表; 如有计划外检查, 请填写“计划外检查”表; 如有 IMV/NIV、ECMO、HFNC、氧疗, 请填写在“IMV/NIV、ECMO、HFNC、氧疗”表中。



|                   |                                          |
|-------------------|------------------------------------------|
| 研究方案编号: KY2020-29 | 治疗期                                      |
| 研究中心编号            | 受试者筛选号                     访视 4 (D10±1d) |

|                 |                                                                                             |                                       |                                       |                                       |                                       |
|-----------------|---------------------------------------------------------------------------------------------|---------------------------------------|---------------------------------------|---------------------------------------|---------------------------------------|
| 谷丙转氨酶 (ALT)     | <input type="checkbox"/> <sub>1</sub> U/L <input type="checkbox"/> <sub>2</sub> 其他: ____    | <input type="checkbox"/> <sub>1</sub> | <input type="checkbox"/> <sub>2</sub> | <input type="checkbox"/> <sub>3</sub> | <input type="checkbox"/> <sub>0</sub> |
| 谷草转氨酶 (AST)     | <input type="checkbox"/> <sub>1</sub> U/L <input type="checkbox"/> <sub>2</sub> 其他: ____    | <input type="checkbox"/> <sub>1</sub> | <input type="checkbox"/> <sub>2</sub> | <input type="checkbox"/> <sub>3</sub> | <input type="checkbox"/> <sub>0</sub> |
| 总胆红素 (TBIL)     | <input type="checkbox"/> <sub>1</sub> μmol/L <input type="checkbox"/> <sub>2</sub> 其他: ____ | <input type="checkbox"/> <sub>1</sub> | <input type="checkbox"/> <sub>2</sub> | <input type="checkbox"/> <sub>3</sub> | <input type="checkbox"/> <sub>0</sub> |
| 白蛋白 (ALB)       | <input type="checkbox"/> <sub>1</sub> g/L <input type="checkbox"/> <sub>2</sub> 其他: ____    | <input type="checkbox"/> <sub>1</sub> | <input type="checkbox"/> <sub>2</sub> | <input type="checkbox"/> <sub>3</sub> | <input type="checkbox"/> <sub>0</sub> |
| γ-谷氨酰转肽酶 (GGT)  | <input type="checkbox"/> <sub>1</sub> U/L <input type="checkbox"/> <sub>2</sub> 其他: ____    | <input type="checkbox"/> <sub>1</sub> | <input type="checkbox"/> <sub>2</sub> | <input type="checkbox"/> <sub>3</sub> | <input type="checkbox"/> <sub>0</sub> |
| 乳酸脱氢酶 (LDH)     | <input type="checkbox"/> <sub>1</sub> U/L <input type="checkbox"/> <sub>2</sub> 其他: ____    | <input type="checkbox"/> <sub>1</sub> | <input type="checkbox"/> <sub>2</sub> | <input type="checkbox"/> <sub>3</sub> | <input type="checkbox"/> <sub>0</sub> |
| 肌酸激酶 (CK)       | <input type="checkbox"/> <sub>1</sub> U/L <input type="checkbox"/> <sub>2</sub> 其他: ____    | <input type="checkbox"/> <sub>1</sub> | <input type="checkbox"/> <sub>2</sub> | <input type="checkbox"/> <sub>3</sub> | <input type="checkbox"/> <sub>0</sub> |
| 肌酸激酶同工酶 (CK-MB) | <input type="checkbox"/> <sub>1</sub> U/L <input type="checkbox"/> <sub>2</sub> 其他: ____    | <input type="checkbox"/> <sub>1</sub> | <input type="checkbox"/> <sub>2</sub> | <input type="checkbox"/> <sub>3</sub> | <input type="checkbox"/> <sub>0</sub> |
| 血尿素氮 (BUN)      | <input type="checkbox"/> <sub>1</sub> mmol/L <input type="checkbox"/> <sub>2</sub> 其他: ____ | <input type="checkbox"/> <sub>1</sub> | <input type="checkbox"/> <sub>2</sub> | <input type="checkbox"/> <sub>3</sub> | <input type="checkbox"/> <sub>0</sub> |
| 尿素 (Urea)       | <input type="checkbox"/> <sub>1</sub> mmol/L <input type="checkbox"/> <sub>2</sub> 其他: ____ | <input type="checkbox"/> <sub>1</sub> | <input type="checkbox"/> <sub>2</sub> | <input type="checkbox"/> <sub>3</sub> | <input type="checkbox"/> <sub>0</sub> |
| 血肌酐 (CR)        | <input type="checkbox"/> <sub>1</sub> μmol/L <input type="checkbox"/> <sub>2</sub> 其他: ____ | <input type="checkbox"/> <sub>1</sub> | <input type="checkbox"/> <sub>2</sub> | <input type="checkbox"/> <sub>3</sub> | <input type="checkbox"/> <sub>0</sub> |

**尿常规** <sub>0</sub> 未查, 原因 \_\_\_\_\_  
<sub>1</sub> 不适用

采样日期: | | | | | | 年 | | | | | | 月 | | | | | | 日  
正常值范围编号: | | | | | | | | | |

| 检查项目   | 测量结果                                                                                        |                                       | 结果判定                                  |                                       |                                       | 未查 |
|--------|---------------------------------------------------------------------------------------------|---------------------------------------|---------------------------------------|---------------------------------------|---------------------------------------|----|
|        | 实测值                                                                                         | 单位                                    | 正常                                    | 异常                                    |                                       |    |
|        |                                                                                             |                                       |                                       | 无临床意义                                 | 有临床意义                                 |    |
| 尿蛋白    | <input type="checkbox"/> <sub>1</sub> 不适用 <input type="checkbox"/> <sub>2</sub> 其他: ____    | <input type="checkbox"/> <sub>1</sub> | <input type="checkbox"/> <sub>2</sub> | <input type="checkbox"/> <sub>3</sub> | <input type="checkbox"/> <sub>0</sub> |    |
| 尿葡萄糖   | <input type="checkbox"/> <sub>1</sub> mmol/L <input type="checkbox"/> <sub>2</sub> 其他: ____ | <input type="checkbox"/> <sub>1</sub> | <input type="checkbox"/> <sub>2</sub> | <input type="checkbox"/> <sub>3</sub> | <input type="checkbox"/> <sub>0</sub> |    |
| 尿 PH 值 | <input type="checkbox"/> <sub>1</sub> 不适用 <input type="checkbox"/> <sub>2</sub> 其他: ____    | <input type="checkbox"/> <sub>1</sub> | <input type="checkbox"/> <sub>2</sub> | <input type="checkbox"/> <sub>3</sub> | <input type="checkbox"/> <sub>0</sub> |    |
| 尿红细胞   | <input type="checkbox"/> <sub>1</sub> 不适用 <input type="checkbox"/> <sub>2</sub> 其他: ____    | <input type="checkbox"/> <sub>1</sub> | <input type="checkbox"/> <sub>2</sub> | <input type="checkbox"/> <sub>3</sub> | <input type="checkbox"/> <sub>0</sub> |    |
| 尿白细胞   | <input type="checkbox"/> <sub>1</sub> 不适用 <input type="checkbox"/> <sub>2</sub> 其他: ____    | <input type="checkbox"/> <sub>1</sub> | <input type="checkbox"/> <sub>2</sub> | <input type="checkbox"/> <sub>3</sub> | <input type="checkbox"/> <sub>0</sub> |    |
| 尿酮体    | <input type="checkbox"/> <sub>1</sub> 不适用 <input type="checkbox"/> <sub>2</sub> 其他: ____    | <input type="checkbox"/> <sub>1</sub> | <input type="checkbox"/> <sub>2</sub> | <input type="checkbox"/> <sub>3</sub> | <input type="checkbox"/> <sub>0</sub> |    |

**凝血功能** <sub>0</sub> 未查, 原因 \_\_\_\_\_

采样日期: | | | | | | 年 | | | | | | 月 | | | | | | 日  
正常值范围编号: | | | | | | | | | |

| 检查项目              | 测量结果                                                                                   |                                       | 结果判定                                  |                                       |                                       | 未查 |
|-------------------|----------------------------------------------------------------------------------------|---------------------------------------|---------------------------------------|---------------------------------------|---------------------------------------|----|
|                   | 实测值                                                                                    | 单位                                    | 正常                                    | 异常                                    |                                       |    |
|                   |                                                                                        |                                       |                                       | 无临床意义                                 | 有临床意义                                 |    |
| 凝血酶原时间 (PT)       | <input type="checkbox"/> <sub>1</sub> S <input type="checkbox"/> <sub>2</sub> 其他: ____ | <input type="checkbox"/> <sub>1</sub> | <input type="checkbox"/> <sub>2</sub> | <input type="checkbox"/> <sub>3</sub> | <input type="checkbox"/> <sub>0</sub> |    |
| 活化部分凝血活酶时间 (APTT) | <input type="checkbox"/> <sub>1</sub> S <input type="checkbox"/> <sub>2</sub> 其他: ____ | <input type="checkbox"/> <sub>1</sub> | <input type="checkbox"/> <sub>2</sub> | <input type="checkbox"/> <sub>3</sub> | <input type="checkbox"/> <sub>0</sub> |    |

|                   |            |
|-------------------|------------|
| 研究方案编号: KY2020-29 | 治疗期        |
| 研究中心编号  __        | 受试者筛选号  __ |
| 访视 4 (D10±1d)     |            |

|               |                                                                                          |                                       |                                       |                                       |                                       |
|---------------|------------------------------------------------------------------------------------------|---------------------------------------|---------------------------------------|---------------------------------------|---------------------------------------|
| 凝血酶时间 (TT)    | <input type="checkbox"/> <sub>1</sub> S <input type="checkbox"/> <sub>2</sub> 其他: ____   | <input type="checkbox"/> <sub>1</sub> | <input type="checkbox"/> <sub>2</sub> | <input type="checkbox"/> <sub>3</sub> | <input type="checkbox"/> <sub>0</sub> |
| 血浆纤维蛋白原 (Fbg) | <input type="checkbox"/> <sub>1</sub> g/L <input type="checkbox"/> <sub>2</sub> 其他: ____ | <input type="checkbox"/> <sub>1</sub> | <input type="checkbox"/> <sub>2</sub> | <input type="checkbox"/> <sub>3</sub> | <input type="checkbox"/> <sub>0</sub> |
| 国际标准化比率 (INR) | <input type="checkbox"/> <sub>1</sub> 不适用 <input type="checkbox"/> <sub>2</sub> 其他: ____ | <input type="checkbox"/> <sub>1</sub> | <input type="checkbox"/> <sub>2</sub> | <input type="checkbox"/> <sub>3</sub> | <input type="checkbox"/> <sub>0</sub> |

| <b>C 反应蛋白 (CRP)</b> <input type="checkbox"/> <sub>0</sub> 未查, 原因 _____ |      |                                                                                           |                                       |                                       |                                       |
|------------------------------------------------------------------------|------|-------------------------------------------------------------------------------------------|---------------------------------------|---------------------------------------|---------------------------------------|
| 采样日期:  __ 年 __ 月 __ 日                                                  |      |                                                                                           | 正常值范围编号:  __                          |                                       |                                       |
| 检查项目                                                                   | 测量结果 |                                                                                           | 结果判定                                  |                                       |                                       |
| C 反应蛋白 (CRP)                                                           | 实测值  | 单位                                                                                        | 正常                                    | 异常                                    |                                       |
|                                                                        |      |                                                                                           |                                       | 无临床意义                                 | 有临床意义                                 |
|                                                                        |      | <input type="checkbox"/> <sub>1</sub> mg/L <input type="checkbox"/> <sub>2</sub> 其他: ____ | <input type="checkbox"/> <sub>1</sub> | <input type="checkbox"/> <sub>2</sub> | <input type="checkbox"/> <sub>3</sub> |

| <b>血沉 (ESR)</b> <input type="checkbox"/> <sub>0</sub> 未查, 原因 _____ |      |                                                                                           |                                       |                                       |                                       |
|--------------------------------------------------------------------|------|-------------------------------------------------------------------------------------------|---------------------------------------|---------------------------------------|---------------------------------------|
| 采样日期:  __ 年 __ 月 __ 日                                              |      |                                                                                           | 正常值范围编号:  __                          |                                       |                                       |
| 检查项目                                                               | 测量结果 |                                                                                           | 结果判定                                  |                                       |                                       |
| 血沉 (ESR)                                                           | 实测值  | 单位                                                                                        | 正常                                    | 异常                                    |                                       |
|                                                                    |      |                                                                                           |                                       | 无临床意义                                 | 有临床意义                                 |
|                                                                    |      | <input type="checkbox"/> <sub>1</sub> mm/h <input type="checkbox"/> <sub>2</sub> 其他: ____ | <input type="checkbox"/> <sub>1</sub> | <input type="checkbox"/> <sub>2</sub> | <input type="checkbox"/> <sub>3</sub> |

| <b>TNF-α</b> <input type="checkbox"/> <sub>0</sub> 未查, 原因 _____ |      |                                                                                            |                                       |                                       |                                       |
|-----------------------------------------------------------------|------|--------------------------------------------------------------------------------------------|---------------------------------------|---------------------------------------|---------------------------------------|
| 采样日期:  __ 年 __ 月 __ 日                                           |      |                                                                                            | 正常值范围编号:  __                          |                                       |                                       |
| 检查项目                                                            | 测量结果 |                                                                                            | 结果判定                                  |                                       |                                       |
| TNF-α                                                           | 实测值  | 单位                                                                                         | 正常                                    | 异常                                    |                                       |
|                                                                 |      |                                                                                            |                                       | 无临床意义                                 | 有临床意义                                 |
|                                                                 |      | <input type="checkbox"/> <sub>1</sub> pg/mL <input type="checkbox"/> <sub>2</sub> 其他: ____ | <input type="checkbox"/> <sub>1</sub> | <input type="checkbox"/> <sub>2</sub> | <input type="checkbox"/> <sub>3</sub> |

| <b>IL-6</b> <input type="checkbox"/> <sub>0</sub> 未查, 原因 _____ |      |                                                                                            |                                       |                                       |                                       |
|----------------------------------------------------------------|------|--------------------------------------------------------------------------------------------|---------------------------------------|---------------------------------------|---------------------------------------|
| 采样日期:  __ 年 __ 月 __ 日                                          |      |                                                                                            | 正常值范围编号:  __                          |                                       |                                       |
| 检查项目                                                           | 测量结果 |                                                                                            | 结果判定                                  |                                       |                                       |
| IL-6                                                           | 实测值  | 单位                                                                                         | 正常                                    | 异常                                    |                                       |
|                                                                |      |                                                                                            |                                       | 无临床意义                                 | 有临床意义                                 |
|                                                                |      | <input type="checkbox"/> <sub>1</sub> pg/mL <input type="checkbox"/> <sub>2</sub> 其他: ____ | <input type="checkbox"/> <sub>1</sub> | <input type="checkbox"/> <sub>2</sub> | <input type="checkbox"/> <sub>3</sub> |

|                   |                     |
|-------------------|---------------------|
| 研究方案编号: KY2020-29 | 治疗期                 |
| 研究中心编号  __        | 受试者筛选号  __ __ __ __ |
| 访视 4 (D10±1d)     |                     |

|                                                                     |                                                                                                                                                                                                                               |
|---------------------------------------------------------------------|-------------------------------------------------------------------------------------------------------------------------------------------------------------------------------------------------------------------------------|
| <b>新型冠状病毒核酸检测</b> <input type="checkbox"/> <sub>0</sub> 未查, 原因_____ |                                                                                                                                                                                                                               |
| 采样部位 (可多选)                                                          | <input type="checkbox"/> <sub>0</sub> 上呼吸道 <input type="checkbox"/> <sub>1</sub> 下呼吸道                                                                                                                                         |
| 上呼吸道                                                                | 采样日期:  __ __ __ __ 年 __ __ 月 __ __ 日<br>检查结果: <input type="checkbox"/> <sub>1</sub> 阴性 <input type="checkbox"/> <sub>2</sub> 阳性 <input type="checkbox"/> <sub>3</sub> 无法判断 <input type="checkbox"/> <sub>4</sub> 其他, 请描述_____ |
| 下呼吸道                                                                | 采样日期:  __ __ __ __ 年 __ __ 月 __ __ 日<br>检查结果: <input type="checkbox"/> <sub>1</sub> 阴性 <input type="checkbox"/> <sub>2</sub> 阳性 <input type="checkbox"/> <sub>3</sub> 无法判断 <input type="checkbox"/> <sub>4</sub> 其他, 请描述_____ |
| 结果判定                                                                | <input type="checkbox"/> <sub>1</sub> 阴性 <input type="checkbox"/> <sub>2</sub> 阳性 <input type="checkbox"/> <sub>3</sub> 无法判断 <input type="checkbox"/> <sub>4</sub> 其他, 请描述_____                                               |

|                                                                          |
|--------------------------------------------------------------------------|
| <b>指脉氧饱和度 (不吸氧情况下)</b> <input type="checkbox"/> <sub>0</sub> 未查, 原因_____ |
| 检查日期:  __ __ __ __ 年 __ __ 月 __ __ 日                                     |
| 实测值: _____% (静息状态)                                                       |

|                                                                                                                                                                                         |
|-----------------------------------------------------------------------------------------------------------------------------------------------------------------------------------------|
| <b>是否转成重型/危重型肺炎</b> <input type="checkbox"/> <sub>0</sub> 未评价      评价日期 __ __ __ __ 年 __ __ 月 __ __ 日                                                                                   |
| 是否转成重型/危重型肺炎: <input type="checkbox"/> <sub>0</sub> 否 <input type="checkbox"/> <sub>1</sub> 是, 临床分型: <input type="checkbox"/> <sub>1</sub> 重型 <input type="checkbox"/> <sub>2</sub> 危重型 |
| 转成重型/危重型肺炎日期:  __ __ __ __ 年 __ __ 月 __ __ 日                                                                                                                                            |

自上次访视以来, 受试者如有不良事件发生, 请填写“不良事件”表; 如有合并药物治疗, 请填写“既往/合并药物治疗”表; 如有合并非药物治疗, 请填写“既往/合并非药物治疗”表; 如有计划外检查, 请填写“计划外检查”表; 如有 IMV/NIV、ECMO、HFNC、氧疗, 请填写在“IMV/NIV、ECMO、HFNC、氧疗”表中。

|                   |                     |
|-------------------|---------------------|
| 研究方案编号: KY2020-29 | 治疗期                 |
| 研究中心编号  __        | 受试者筛选号  __ __ __ __ |
| 访视 5 (D14±1d)     |                     |

本次访视日期: |\_\_|\_\_|\_\_|年|\_\_|\_\_|月|\_\_|\_\_|日

|                                              |                                     |      |                                                                                                                                                                                                        |
|----------------------------------------------|-------------------------------------|------|--------------------------------------------------------------------------------------------------------------------------------------------------------------------------------------------------------|
| 生命体征 <input type="checkbox"/> _0 未查, 原因_____ |                                     |      |                                                                                                                                                                                                        |
| 检查日期                                         | __ __ __ 年 __ __ 月 __ __ 日          |      |                                                                                                                                                                                                        |
| 日最高体温                                        | __ __ . __ °C                       | 测量方式 | <input type="checkbox"/> _1 腋下 <input type="checkbox"/> _2 口腔 <input type="checkbox"/> _3 肛门<br><input type="checkbox"/> _4 耳朵 <input type="checkbox"/> _5 未知 <input type="checkbox"/> _6 其他, 请描述_____ |
| 呼吸频率                                         | __ __ 次/分                           | 脉搏   | __ __ __ 次/分                                                                                                                                                                                           |
| 血压                                           | __ __ __ / __ __ __  mmHg (收缩压/舒张压) |      |                                                                                                                                                                                                        |

| 体格检查 <input type="checkbox"/> _0 未查, 原因_____ |                             |                             |                             |                             |       |
|----------------------------------------------|-----------------------------|-----------------------------|-----------------------------|-----------------------------|-------|
| 检查日期:  __ __ __ 年 __ __ 月 __ __ 日            |                             |                             |                             |                             |       |
| 检查部位                                         | 检查结果                        |                             |                             |                             | 异常请描述 |
|                                              | 1=正常                        | 2=异常无临床意义                   | 3=异常有临床意义                   | 0=未查                        |       |
| 整体外观                                         | <input type="checkbox"/> _1 | <input type="checkbox"/> _2 | <input type="checkbox"/> _3 | <input type="checkbox"/> _0 |       |
| 头                                            | <input type="checkbox"/> _1 | <input type="checkbox"/> _2 | <input type="checkbox"/> _3 | <input type="checkbox"/> _0 |       |
| 眼                                            | <input type="checkbox"/> _1 | <input type="checkbox"/> _2 | <input type="checkbox"/> _3 | <input type="checkbox"/> _0 |       |
| 耳                                            | <input type="checkbox"/> _1 | <input type="checkbox"/> _2 | <input type="checkbox"/> _3 | <input type="checkbox"/> _0 |       |
| 鼻                                            | <input type="checkbox"/> _1 | <input type="checkbox"/> _2 | <input type="checkbox"/> _3 | <input type="checkbox"/> _0 |       |
| 喉                                            | <input type="checkbox"/> _1 | <input type="checkbox"/> _2 | <input type="checkbox"/> _3 | <input type="checkbox"/> _0 |       |
| 颈部及甲状腺                                       | <input type="checkbox"/> _1 | <input type="checkbox"/> _2 | <input type="checkbox"/> _3 | <input type="checkbox"/> _0 |       |
| 皮肤                                           | <input type="checkbox"/> _1 | <input type="checkbox"/> _2 | <input type="checkbox"/> _3 | <input type="checkbox"/> _0 |       |
| 心血管系统                                        | <input type="checkbox"/> _1 | <input type="checkbox"/> _2 | <input type="checkbox"/> _3 | <input type="checkbox"/> _0 |       |
| 胸部及肺                                         | <input type="checkbox"/> _1 | <input type="checkbox"/> _2 | <input type="checkbox"/> _3 | <input type="checkbox"/> _0 |       |
| 腹部                                           | <input type="checkbox"/> _1 | <input type="checkbox"/> _2 | <input type="checkbox"/> _3 | <input type="checkbox"/> _0 |       |
| 神经系统                                         | <input type="checkbox"/> _1 | <input type="checkbox"/> _2 | <input type="checkbox"/> _3 | <input type="checkbox"/> _0 |       |
| 骨骼肌系统                                        | <input type="checkbox"/> _1 | <input type="checkbox"/> _2 | <input type="checkbox"/> _3 | <input type="checkbox"/> _0 |       |
| 淋巴系统                                         | <input type="checkbox"/> _1 | <input type="checkbox"/> _2 | <input type="checkbox"/> _3 | <input type="checkbox"/> _0 |       |

|                   |                     |
|-------------------|---------------------|
| 研究方案编号: KY2020-29 | 治疗期                 |
| 研究中心编号  __        | 受试者筛选号  __ __ __ __ |
| 访视 5 (D14±1d)     |                     |

**有无呼吸道症状** <sub>0</sub> 未查, 原因 \_\_\_\_\_

检查日期: |\_\_|\_\_|\_\_|年|\_\_|\_\_|月|\_\_|\_\_|日

受试者有无呼吸道症状: <sub>0</sub> 无 <sub>1</sub> 有, 请描述: \_\_\_\_\_

**血常规** <sub>0</sub> 未查, 原因 \_\_\_\_\_

采样日期: |\_\_|\_\_|\_\_|年|\_\_|\_\_|月|\_\_|\_\_|日 正常值范围编号: |\_\_|\_\_|\_\_|

| 检查项目          | 测量结果 |                                                                                                           | 结果判定                                  |                                       |                                       | 未查                                    |
|---------------|------|-----------------------------------------------------------------------------------------------------------|---------------------------------------|---------------------------------------|---------------------------------------|---------------------------------------|
|               | 实测值  | 单位                                                                                                        | 正常                                    | 异常                                    |                                       |                                       |
|               |      |                                                                                                           |                                       | 无临床意义                                 | 有临床意义                                 |                                       |
| 红细胞计数 (RBC)   |      | <input type="checkbox"/> <sub>1</sub> 10 <sup>12</sup> /L <input type="checkbox"/> <sub>2</sub> 其他: _____ | <input type="checkbox"/> <sub>1</sub> | <input type="checkbox"/> <sub>2</sub> | <input type="checkbox"/> <sub>3</sub> | <input type="checkbox"/> <sub>0</sub> |
| 白细胞计数 (WBC)   |      | <input type="checkbox"/> <sub>1</sub> 10 <sup>9</sup> /L <input type="checkbox"/> <sub>2</sub> 其他: _____  | <input type="checkbox"/> <sub>1</sub> | <input type="checkbox"/> <sub>2</sub> | <input type="checkbox"/> <sub>3</sub> | <input type="checkbox"/> <sub>0</sub> |
| 血红蛋白 (Hb)     |      | <input type="checkbox"/> <sub>1</sub> g/L <input type="checkbox"/> <sub>2</sub> 其他: _____                 | <input type="checkbox"/> <sub>1</sub> | <input type="checkbox"/> <sub>2</sub> | <input type="checkbox"/> <sub>3</sub> | <input type="checkbox"/> <sub>0</sub> |
| 血小板计数 (PLT)   |      | <input type="checkbox"/> <sub>1</sub> 10 <sup>9</sup> /L <input type="checkbox"/> <sub>2</sub> 其他: _____  | <input type="checkbox"/> <sub>1</sub> | <input type="checkbox"/> <sub>2</sub> | <input type="checkbox"/> <sub>3</sub> | <input type="checkbox"/> <sub>0</sub> |
| 中性粒细胞计数 (ANC) |      | <input type="checkbox"/> <sub>1</sub> 10 <sup>9</sup> /L <input type="checkbox"/> <sub>2</sub> 其他: _____  | <input type="checkbox"/> <sub>1</sub> | <input type="checkbox"/> <sub>2</sub> | <input type="checkbox"/> <sub>3</sub> | <input type="checkbox"/> <sub>0</sub> |
| 淋巴细胞计数 (LY)   |      | <input type="checkbox"/> <sub>1</sub> 10 <sup>9</sup> /L <input type="checkbox"/> <sub>2</sub> 其他: _____  | <input type="checkbox"/> <sub>1</sub> | <input type="checkbox"/> <sub>2</sub> | <input type="checkbox"/> <sub>3</sub> | <input type="checkbox"/> <sub>0</sub> |
| 单核细胞计数 (MO)   |      | <input type="checkbox"/> <sub>1</sub> 10 <sup>9</sup> /L <input type="checkbox"/> <sub>2</sub> 其他: _____  | <input type="checkbox"/> <sub>1</sub> | <input type="checkbox"/> <sub>2</sub> | <input type="checkbox"/> <sub>3</sub> | <input type="checkbox"/> <sub>0</sub> |
| 嗜酸性粒细胞计数 (EO) |      | <input type="checkbox"/> <sub>1</sub> 10 <sup>9</sup> /L <input type="checkbox"/> <sub>2</sub> 其他: _____  | <input type="checkbox"/> <sub>1</sub> | <input type="checkbox"/> <sub>2</sub> | <input type="checkbox"/> <sub>3</sub> | <input type="checkbox"/> <sub>0</sub> |
| 嗜碱性粒细胞计数 (BA) |      | <input type="checkbox"/> <sub>1</sub> 10 <sup>9</sup> /L <input type="checkbox"/> <sub>2</sub> 其他: _____  | <input type="checkbox"/> <sub>1</sub> | <input type="checkbox"/> <sub>2</sub> | <input type="checkbox"/> <sub>3</sub> | <input type="checkbox"/> <sub>0</sub> |

**血生化** <sub>0</sub> 未查, 原因 \_\_\_\_\_

采样日期: |\_\_|\_\_|\_\_|年|\_\_|\_\_|月|\_\_|\_\_|日 正常值范围编号: |\_\_|\_\_|\_\_|

| 检查项目            | 测量结果 |                                                                                              | 结果判定                                  |                                       |                                       | 未查                                    |
|-----------------|------|----------------------------------------------------------------------------------------------|---------------------------------------|---------------------------------------|---------------------------------------|---------------------------------------|
|                 | 实测值  | 单位                                                                                           | 正常                                    | 异常                                    |                                       |                                       |
|                 |      |                                                                                              |                                       | 无临床意义                                 | 有临床意义                                 |                                       |
| 谷丙转氨酶 (ALT)     |      | <input type="checkbox"/> <sub>1</sub> U/L <input type="checkbox"/> <sub>2</sub> 其他: _____    | <input type="checkbox"/> <sub>1</sub> | <input type="checkbox"/> <sub>2</sub> | <input type="checkbox"/> <sub>3</sub> | <input type="checkbox"/> <sub>0</sub> |
| 谷草转氨酶 (AST)     |      | <input type="checkbox"/> <sub>1</sub> U/L <input type="checkbox"/> <sub>2</sub> 其他: _____    | <input type="checkbox"/> <sub>1</sub> | <input type="checkbox"/> <sub>2</sub> | <input type="checkbox"/> <sub>3</sub> | <input type="checkbox"/> <sub>0</sub> |
| 总胆红素 (TBIL)     |      | <input type="checkbox"/> <sub>1</sub> μmol/L <input type="checkbox"/> <sub>2</sub> 其他: _____ | <input type="checkbox"/> <sub>1</sub> | <input type="checkbox"/> <sub>2</sub> | <input type="checkbox"/> <sub>3</sub> | <input type="checkbox"/> <sub>0</sub> |
| 白蛋白 (ALB)       |      | <input type="checkbox"/> <sub>1</sub> g/L <input type="checkbox"/> <sub>2</sub> 其他: _____    | <input type="checkbox"/> <sub>1</sub> | <input type="checkbox"/> <sub>2</sub> | <input type="checkbox"/> <sub>3</sub> | <input type="checkbox"/> <sub>0</sub> |
| γ-谷氨酰转肽酶 (GGT)  |      | <input type="checkbox"/> <sub>1</sub> U/L <input type="checkbox"/> <sub>2</sub> 其他: _____    | <input type="checkbox"/> <sub>1</sub> | <input type="checkbox"/> <sub>2</sub> | <input type="checkbox"/> <sub>3</sub> | <input type="checkbox"/> <sub>0</sub> |
| 乳酸脱氢酶 (LDH)     |      | <input type="checkbox"/> <sub>1</sub> U/L <input type="checkbox"/> <sub>2</sub> 其他: _____    | <input type="checkbox"/> <sub>1</sub> | <input type="checkbox"/> <sub>2</sub> | <input type="checkbox"/> <sub>3</sub> | <input type="checkbox"/> <sub>0</sub> |
| 肌酸激酶 (CK)       |      | <input type="checkbox"/> <sub>1</sub> U/L <input type="checkbox"/> <sub>2</sub> 其他: _____    | <input type="checkbox"/> <sub>1</sub> | <input type="checkbox"/> <sub>2</sub> | <input type="checkbox"/> <sub>3</sub> | <input type="checkbox"/> <sub>0</sub> |
| 肌酸激酶同工酶 (CK-MB) |      | <input type="checkbox"/> <sub>1</sub> U/L <input type="checkbox"/> <sub>2</sub> 其他: _____    | <input type="checkbox"/> <sub>1</sub> | <input type="checkbox"/> <sub>2</sub> | <input type="checkbox"/> <sub>3</sub> | <input type="checkbox"/> <sub>0</sub> |
| 血尿素氮 (BUN)      |      | <input type="checkbox"/> <sub>1</sub> mmol/L <input type="checkbox"/> <sub>2</sub> 其他: _____ | <input type="checkbox"/> <sub>1</sub> | <input type="checkbox"/> <sub>2</sub> | <input type="checkbox"/> <sub>3</sub> | <input type="checkbox"/> <sub>0</sub> |
| 尿素 (Urea)       |      | <input type="checkbox"/> <sub>1</sub> mmol/L <input type="checkbox"/> <sub>2</sub> 其他: _____ | <input type="checkbox"/> <sub>1</sub> | <input type="checkbox"/> <sub>2</sub> | <input type="checkbox"/> <sub>3</sub> | <input type="checkbox"/> <sub>0</sub> |

|                   |                     |
|-------------------|---------------------|
| 研究方案编号: KY2020-29 | 治疗期                 |
| 研究中心编号  __        | 受试者筛选号  __ __ __ __ |
| 访视 5 (D14±1d)     |                     |

|          |                                                                                             |                                       |                                       |                                       |                                       |
|----------|---------------------------------------------------------------------------------------------|---------------------------------------|---------------------------------------|---------------------------------------|---------------------------------------|
| 血肌酐 (CR) | <input type="checkbox"/> <sub>1</sub> μmol/L <input type="checkbox"/> <sub>2</sub> 其他: ____ | <input type="checkbox"/> <sub>1</sub> | <input type="checkbox"/> <sub>2</sub> | <input type="checkbox"/> <sub>3</sub> | <input type="checkbox"/> <sub>0</sub> |
|----------|---------------------------------------------------------------------------------------------|---------------------------------------|---------------------------------------|---------------------------------------|---------------------------------------|

| 尿常规 <input type="checkbox"/> <sub>0</sub> 未查, 原因 _____ |                                                                                             |                                       |                                       |                                       |                                       |    |
|--------------------------------------------------------|---------------------------------------------------------------------------------------------|---------------------------------------|---------------------------------------|---------------------------------------|---------------------------------------|----|
| 采样日期:  __ __ __ 年 __ __ 月 __ __ 日                      |                                                                                             |                                       |                                       | 正常值范围编号:  __ __ __                    |                                       |    |
| 检查项目                                                   | 测量结果                                                                                        |                                       | 结果判定                                  |                                       |                                       | 未查 |
|                                                        | 实测值                                                                                         | 单位                                    | 正常                                    | 异常                                    |                                       |    |
|                                                        |                                                                                             |                                       |                                       | 无临床意义                                 | 有临床意义                                 |    |
| 尿蛋白                                                    | <input type="checkbox"/> <sub>1</sub> 不适用 <input type="checkbox"/> <sub>2</sub> 其他: ____    | <input type="checkbox"/> <sub>1</sub> | <input type="checkbox"/> <sub>2</sub> | <input type="checkbox"/> <sub>3</sub> | <input type="checkbox"/> <sub>0</sub> |    |
| 尿葡萄糖                                                   | <input type="checkbox"/> <sub>1</sub> mmol/L <input type="checkbox"/> <sub>2</sub> 其他: ____ | <input type="checkbox"/> <sub>1</sub> | <input type="checkbox"/> <sub>2</sub> | <input type="checkbox"/> <sub>3</sub> | <input type="checkbox"/> <sub>0</sub> |    |
| 尿 PH 值                                                 | <input type="checkbox"/> <sub>1</sub> 不适用 <input type="checkbox"/> <sub>2</sub> 其他: ____    | <input type="checkbox"/> <sub>1</sub> | <input type="checkbox"/> <sub>2</sub> | <input type="checkbox"/> <sub>3</sub> | <input type="checkbox"/> <sub>0</sub> |    |
| 尿红细胞                                                   | <input type="checkbox"/> <sub>1</sub> 不适用 <input type="checkbox"/> <sub>2</sub> 其他: ____    | <input type="checkbox"/> <sub>1</sub> | <input type="checkbox"/> <sub>2</sub> | <input type="checkbox"/> <sub>3</sub> | <input type="checkbox"/> <sub>0</sub> |    |
| 尿白细胞                                                   | <input type="checkbox"/> <sub>1</sub> 不适用 <input type="checkbox"/> <sub>2</sub> 其他: ____    | <input type="checkbox"/> <sub>1</sub> | <input type="checkbox"/> <sub>2</sub> | <input type="checkbox"/> <sub>3</sub> | <input type="checkbox"/> <sub>0</sub> |    |
| 尿酮体                                                    | <input type="checkbox"/> <sub>1</sub> 不适用 <input type="checkbox"/> <sub>2</sub> 其他: ____    | <input type="checkbox"/> <sub>1</sub> | <input type="checkbox"/> <sub>2</sub> | <input type="checkbox"/> <sub>3</sub> | <input type="checkbox"/> <sub>0</sub> |    |

| 凝血功能 <input type="checkbox"/> <sub>0</sub> 未查, 原因 _____ |                                                                                          |                                       |                                       |                                       |                                       |    |
|---------------------------------------------------------|------------------------------------------------------------------------------------------|---------------------------------------|---------------------------------------|---------------------------------------|---------------------------------------|----|
| 采样日期:  __ __ __ 年 __ __ 月 __ __ 日                       |                                                                                          |                                       |                                       | 正常值范围编号:  __ __ __                    |                                       |    |
| 检查项目                                                    | 测量结果                                                                                     |                                       | 结果判定                                  |                                       |                                       | 未查 |
|                                                         | 实测值                                                                                      | 单位                                    | 正常                                    | 异常                                    |                                       |    |
|                                                         |                                                                                          |                                       |                                       | 无临床意义                                 | 有临床意义                                 |    |
| 凝血酶原时间 (PT)                                             | <input type="checkbox"/> <sub>1</sub> S <input type="checkbox"/> <sub>2</sub> 其他: ____   | <input type="checkbox"/> <sub>1</sub> | <input type="checkbox"/> <sub>2</sub> | <input type="checkbox"/> <sub>3</sub> | <input type="checkbox"/> <sub>0</sub> |    |
| 活化部分凝血活酶时间 (APTT)                                       | <input type="checkbox"/> <sub>1</sub> S <input type="checkbox"/> <sub>2</sub> 其他: ____   | <input type="checkbox"/> <sub>1</sub> | <input type="checkbox"/> <sub>2</sub> | <input type="checkbox"/> <sub>3</sub> | <input type="checkbox"/> <sub>0</sub> |    |
| 凝血酶时间 (TT)                                              | <input type="checkbox"/> <sub>1</sub> S <input type="checkbox"/> <sub>2</sub> 其他: ____   | <input type="checkbox"/> <sub>1</sub> | <input type="checkbox"/> <sub>2</sub> | <input type="checkbox"/> <sub>3</sub> | <input type="checkbox"/> <sub>0</sub> |    |
| 血浆纤维蛋白原 (Fbg)                                           | <input type="checkbox"/> <sub>1</sub> g/L <input type="checkbox"/> <sub>2</sub> 其他: ____ | <input type="checkbox"/> <sub>1</sub> | <input type="checkbox"/> <sub>2</sub> | <input type="checkbox"/> <sub>3</sub> | <input type="checkbox"/> <sub>0</sub> |    |
| 国际标准化比率 (INR)                                           | <input type="checkbox"/> <sub>1</sub> 不适用 <input type="checkbox"/> <sub>2</sub> 其他: ____ | <input type="checkbox"/> <sub>1</sub> | <input type="checkbox"/> <sub>2</sub> | <input type="checkbox"/> <sub>3</sub> | <input type="checkbox"/> <sub>0</sub> |    |

| C 反应蛋白 (CRP) <input type="checkbox"/> <sub>0</sub> 未查, 原因 _____ |                                                                                           |                                       |                                       |                                       |                                       |    |
|-----------------------------------------------------------------|-------------------------------------------------------------------------------------------|---------------------------------------|---------------------------------------|---------------------------------------|---------------------------------------|----|
| 采样日期:  __ __ __ 年 __ __ 月 __ __ 日                               |                                                                                           |                                       |                                       | 正常值范围编号:  __ __ __                    |                                       |    |
| 检查项目                                                            | 测量结果                                                                                      |                                       | 结果判定                                  |                                       |                                       | 未查 |
|                                                                 | 实测值                                                                                       | 单位                                    | 正常                                    | 异常                                    |                                       |    |
|                                                                 |                                                                                           |                                       |                                       | 无临床意义                                 | 有临床意义                                 |    |
| C 反应蛋白 (CRP)                                                    | <input type="checkbox"/> <sub>1</sub> mg/L <input type="checkbox"/> <sub>2</sub> 其他: ____ | <input type="checkbox"/> <sub>1</sub> | <input type="checkbox"/> <sub>2</sub> | <input type="checkbox"/> <sub>3</sub> | <input type="checkbox"/> <sub>0</sub> |    |

|                                                             |  |  |  |                    |  |  |
|-------------------------------------------------------------|--|--|--|--------------------|--|--|
| 血沉 (ESR) <input type="checkbox"/> <sub>0</sub> 未查, 原因 _____ |  |  |  |                    |  |  |
| 采样日期:  __ __ __ 年 __ __ 月 __ __ 日                           |  |  |  | 正常值范围编号:  __ __ __ |  |  |



|                   |        |
|-------------------|--------|
| 研究方案编号: KY2020-29 | 治疗期    |
| 研究中心编号            | 受试者筛选号 |
| 访视 5 (D14±1d)     |        |

| 检查项目     | 测量结果 |                                                                                            | 结果判定                                  |                                       |                                       |
|----------|------|--------------------------------------------------------------------------------------------|---------------------------------------|---------------------------------------|---------------------------------------|
|          | 实测值  | 单位                                                                                         | 正常                                    | 异常                                    |                                       |
| 血沉 (ESR) |      |                                                                                            |                                       | 无临床意义                                 | 有临床意义                                 |
|          |      | <input type="checkbox"/> <sub>1</sub> mm/h <input type="checkbox"/> <sub>2</sub> 其他: _____ | <input type="checkbox"/> <sub>1</sub> | <input type="checkbox"/> <sub>2</sub> | <input type="checkbox"/> <sub>3</sub> |

| <b>TNF-α</b> <input type="checkbox"/> <sub>0</sub> 未查, 原因 _____ |      |                                                                                             |                                       |                                       |                                       |
|-----------------------------------------------------------------|------|---------------------------------------------------------------------------------------------|---------------------------------------|---------------------------------------|---------------------------------------|
| 采样日期:           年       月       日                               |      |                                                                                             | 正常值范围编号:                              |                                       |                                       |
| 检查项目                                                            | 测量结果 |                                                                                             | 结果判定                                  |                                       |                                       |
|                                                                 | 实测值  | 单位                                                                                          | 正常                                    | 异常                                    |                                       |
| TNF-α                                                           |      |                                                                                             |                                       | 无临床意义                                 | 有临床意义                                 |
|                                                                 |      | <input type="checkbox"/> <sub>1</sub> pg/mL <input type="checkbox"/> <sub>2</sub> 其他: _____ | <input type="checkbox"/> <sub>1</sub> | <input type="checkbox"/> <sub>2</sub> | <input type="checkbox"/> <sub>3</sub> |

| <b>IL-6</b> <input type="checkbox"/> <sub>0</sub> 未查, 原因 _____ |      |                                                                                             |                                       |                                       |                                       |
|----------------------------------------------------------------|------|---------------------------------------------------------------------------------------------|---------------------------------------|---------------------------------------|---------------------------------------|
| 采样日期:           年       月       日                              |      |                                                                                             | 正常值范围编号:                              |                                       |                                       |
| 检查项目                                                           | 测量结果 |                                                                                             | 结果判定                                  |                                       |                                       |
|                                                                | 实测值  | 单位                                                                                          | 正常                                    | 异常                                    |                                       |
| IL-6                                                           |      |                                                                                             |                                       | 无临床意义                                 | 有临床意义                                 |
|                                                                |      | <input type="checkbox"/> <sub>1</sub> pg/mL <input type="checkbox"/> <sub>2</sub> 其他: _____ | <input type="checkbox"/> <sub>1</sub> | <input type="checkbox"/> <sub>2</sub> | <input type="checkbox"/> <sub>3</sub> |

|                                                                                                                                            |  |  |          |  |  |
|--------------------------------------------------------------------------------------------------------------------------------------------|--|--|----------|--|--|
| <b>尿或血清 HCG (仅适用于育龄女性)</b> <input type="checkbox"/> <sub>0</sub> 未查, 原因 _____<br><input type="checkbox"/> <sub>1</sub> 不适用 (男性或不具有生育能力的女性) |  |  |          |  |  |
| 采样日期:           年       月       日                                                                                                          |  |  | 正常值范围编号: |  |  |
| 采样类别: <input type="checkbox"/> <sub>1</sub> 血液 <input type="checkbox"/> <sub>2</sub> 尿液                                                    |  |  |          |  |  |
| 检查结果: <input type="checkbox"/> <sub>1</sub> 阴性 <input type="checkbox"/> <sub>2</sub> 阳性 <input type="checkbox"/> <sub>3</sub> 其他: _____    |  |  |          |  |  |
| 单位: <input type="checkbox"/> <sub>1</sub> 不适用 <input type="checkbox"/> <sub>2</sub> mIU/mL <input type="checkbox"/> <sub>3</sub> 其他: _____ |  |  |          |  |  |

|                                                                                                                                            |  |  |  |  |  |
|--------------------------------------------------------------------------------------------------------------------------------------------|--|--|--|--|--|
| <b>12 导联心电图</b> <input type="checkbox"/> <sub>0</sub> 未查, 原因 _____                                                                         |  |  |  |  |  |
| 检查日期:           年       月       日                                                                                                          |  |  |  |  |  |
| 检查结果: <input type="checkbox"/> <sub>1</sub> 正常 <input type="checkbox"/> <sub>2</sub> 异常无临床意义 <input type="checkbox"/> <sub>3</sub> 异常有临床意义 |  |  |  |  |  |
| 若“异常”, 请描述: _____<br>_____                                                                                                                 |  |  |  |  |  |

|                                                                                                                                            |  |  |  |  |  |
|--------------------------------------------------------------------------------------------------------------------------------------------|--|--|--|--|--|
| <b>胸部 CT</b> <input type="checkbox"/> <sub>0</sub> 未查, 原因 _____<br><input type="checkbox"/> <sub>1</sub> 不适用                               |  |  |  |  |  |
| 检查日期:           年       月       日                                                                                                          |  |  |  |  |  |
| 检查结果: <input type="checkbox"/> <sub>1</sub> 正常 <input type="checkbox"/> <sub>2</sub> 异常无临床意义 <input type="checkbox"/> <sub>3</sub> 异常有临床意义 |  |  |  |  |  |

|                   |                     |
|-------------------|---------------------|
| 研究方案编号: KY2020-29 | 治疗期                 |
| 研究中心编号  __        | 受试者筛选号  __ __ __ __ |
| 访视 5 (D14±1d)     |                     |

若异常, 请描述: \_\_\_\_\_

是否胸部 CT 病灶吸收较基线≥50%? <sub>0</sub> 否 <sub>1</sub> 是 <sub>2</sub> 无法判断 <sub>3</sub> 不适用  
<sub>4</sub> 其他, 请描述: \_\_\_\_\_

|                                                                     |                                                                                                                                                                                                                            |
|---------------------------------------------------------------------|----------------------------------------------------------------------------------------------------------------------------------------------------------------------------------------------------------------------------|
| <b>新型冠状病毒核酸检测</b> <input type="checkbox"/> <sub>0</sub> 未查, 原因_____ |                                                                                                                                                                                                                            |
| 采样部位 (可多选)                                                          | <input type="checkbox"/> <sub>0</sub> 上呼吸道 <input type="checkbox"/> <sub>1</sub> 下呼吸道                                                                                                                                      |
| 上呼吸道                                                                | 采样日期:  __ __ __ 年 __ __ 月 __ __ 日<br>检查结果: <input type="checkbox"/> <sub>1</sub> 阴性 <input type="checkbox"/> <sub>2</sub> 阳性 <input type="checkbox"/> <sub>3</sub> 无法判断 <input type="checkbox"/> <sub>4</sub> 其他, 请描述_____ |
| 下呼吸道                                                                | 采样日期:  __ __ __ 年 __ __ 月 __ __ 日<br>检查结果: <input type="checkbox"/> <sub>1</sub> 阴性 <input type="checkbox"/> <sub>2</sub> 阳性 <input type="checkbox"/> <sub>3</sub> 无法判断 <input type="checkbox"/> <sub>4</sub> 其他, 请描述_____ |
| 结果判定                                                                | <input type="checkbox"/> <sub>1</sub> 阴性 <input type="checkbox"/> <sub>2</sub> 阳性 <input type="checkbox"/> <sub>3</sub> 无法判断 <input type="checkbox"/> <sub>4</sub> 其他, 请描述_____                                            |

|                                                                          |
|--------------------------------------------------------------------------|
| <b>指脉氧饱和度 (不吸氧情况下)</b> <input type="checkbox"/> <sub>0</sub> 未查, 原因_____ |
| 检查日期:  __ __ __ 年 __ __ 月 __ __ 日                                        |
| 实测值: _____% (静息状态)                                                       |

|                                                                                                                                                                                         |
|-----------------------------------------------------------------------------------------------------------------------------------------------------------------------------------------|
| <b>是否转成重型/危重型肺炎</b> <input type="checkbox"/> <sub>0</sub> 未评价 评价日期 __ __ __ 年 __ __ 月 __ __ 日                                                                                           |
| 是否转成重型/危重型肺炎: <input type="checkbox"/> <sub>0</sub> 否 <input type="checkbox"/> <sub>1</sub> 是, 临床分型: <input type="checkbox"/> <sub>1</sub> 重型 <input type="checkbox"/> <sub>2</sub> 危重型 |
| 转成重型/危重型肺炎日期:  __ __ __ 年 __ __ 月 __ __ 日                                                                                                                                               |

自上次访视以来, 受试者如有不良事件发生, 请填写“不良事件”表; 如有合并药物治疗, 请填写“既往/合并药物治疗”表; 如有合并非药物治疗, 请填写“既往/合并非药物治疗”表; 如有计划外检查, 请填写“计划外检查”表; 如有 IMV/NIV、ECMO、HFNC、HFNC、氧疗, 请填写在“IMV/NIV、ECMO、HFNC、氧疗”表中。

|                                                      |             |
|------------------------------------------------------|-------------|
| 研究方案编号: KY2020-29                                    | <b>治疗结束</b> |
| 研究中心编号  __   __  受试者筛选号  __   __   __   __   __   __ |             |

| 治疗结束                                                                                                                                                                                                                                                                                                                                                                                                                                                  |
|-------------------------------------------------------------------------------------------------------------------------------------------------------------------------------------------------------------------------------------------------------------------------------------------------------------------------------------------------------------------------------------------------------------------------------------------------------|
| 受试者是否按研究方案完成了所有治疗? <input type="checkbox"/> 否 <input type="checkbox"/> 是                                                                                                                                                                                                                                                                                                                                                                              |
| 治疗结束日期:  __   __   __  年  __   __  月  __   __  日                                                                                                                                                                                                                                                                                                                                                                                                      |
| <p>如提前退出治疗, 请选择最重要的原因 (单选):</p> <p><input type="checkbox"/> 研究期间出现疾病恶化, 经研究者综合评估后需要改变治疗</p> <p><input type="checkbox"/> 药物不良事件导致病情加重的出现</p> <p><input type="checkbox"/> 患者不愿意继续使用研究药物</p> <p><input type="checkbox"/> 妊娠</p> <p><input type="checkbox"/> 受试者失访</p> <p><input type="checkbox"/> 受试者死亡</p> <p><input type="checkbox"/> 受试者撤回知情同意</p> <p><input type="checkbox"/> 研究整体中止</p> <p><input type="checkbox"/> 其他, 请描述: _____</p> <p>_____</p> |
| <p>备注 (请记录其他需要补充说明的事由):</p> <p>_____</p> <p>_____</p> <p>_____</p>                                                                                                                                                                                                                                                                                                                                                                                    |

|                   |                     |
|-------------------|---------------------|
| 研究方案编号: KY2020-29 | 延伸随访期               |
| 研究中心编号  __        | 受试者筛选号  __ __ __ __ |
|                   | 访视 6 (D21±2d)       |

访视类型: <sub>1</sub> 电话随访      <sub>2</sub> 医院随访

本次访视日期: |\_\_|\_\_|\_\_|年|\_\_|月|\_\_|日

如受试者已出院, 以下内容可不进行, 如未进行请留空; 如受试者未出院, 请进行以下检查。

|                                                         |                               |      |                                                                                                                                                                                                                                                                     |
|---------------------------------------------------------|-------------------------------|------|---------------------------------------------------------------------------------------------------------------------------------------------------------------------------------------------------------------------------------------------------------------------|
| 生命体征 <input type="checkbox"/> <sub>0</sub> 未查, 原因 _____ |                               |      |                                                                                                                                                                                                                                                                     |
| 检查日期                                                    | __ __ __ 年 __ 月 __ 日          |      |                                                                                                                                                                                                                                                                     |
| 日最高体温                                                   | __ __ . __ °C                 | 测量方式 | <input type="checkbox"/> <sub>1</sub> 腋下 <input type="checkbox"/> <sub>2</sub> 口腔 <input type="checkbox"/> <sub>3</sub> 肛门<br><input type="checkbox"/> <sub>4</sub> 耳朵 <input type="checkbox"/> <sub>5</sub> 未知 <input type="checkbox"/> <sub>6</sub> 其他, 请描述 _____ |
| 呼吸频率                                                    | __ __ 次/分                     | 脉搏   | __ __ 次/分                                                                                                                                                                                                                                                           |
| 血压                                                      | __ __ / __ __  mmHg (收缩压/舒张压) |      |                                                                                                                                                                                                                                                                     |

| 体格检查 <input type="checkbox"/> <sub>0</sub> 未查, 原因 _____ |                                       |                                       |                                       |                                       |       |
|---------------------------------------------------------|---------------------------------------|---------------------------------------|---------------------------------------|---------------------------------------|-------|
| 检查日期:  __ __ __ 年 __ 月 __ 日                             |                                       |                                       |                                       |                                       |       |
| 检查部位                                                    | 检查结果                                  |                                       |                                       |                                       | 异常请描述 |
|                                                         | 1=正常                                  | 2=异常无临床意义                             | 3=异常有临床意义                             | 0=未查                                  |       |
| 整体外观                                                    | <input type="checkbox"/> <sub>1</sub> | <input type="checkbox"/> <sub>2</sub> | <input type="checkbox"/> <sub>3</sub> | <input type="checkbox"/> <sub>0</sub> |       |
| 头                                                       | <input type="checkbox"/> <sub>1</sub> | <input type="checkbox"/> <sub>2</sub> | <input type="checkbox"/> <sub>3</sub> | <input type="checkbox"/> <sub>0</sub> |       |
| 眼                                                       | <input type="checkbox"/> <sub>1</sub> | <input type="checkbox"/> <sub>2</sub> | <input type="checkbox"/> <sub>3</sub> | <input type="checkbox"/> <sub>0</sub> |       |
| 耳                                                       | <input type="checkbox"/> <sub>1</sub> | <input type="checkbox"/> <sub>2</sub> | <input type="checkbox"/> <sub>3</sub> | <input type="checkbox"/> <sub>0</sub> |       |
| 鼻                                                       | <input type="checkbox"/> <sub>1</sub> | <input type="checkbox"/> <sub>2</sub> | <input type="checkbox"/> <sub>3</sub> | <input type="checkbox"/> <sub>0</sub> |       |
| 喉                                                       | <input type="checkbox"/> <sub>1</sub> | <input type="checkbox"/> <sub>2</sub> | <input type="checkbox"/> <sub>3</sub> | <input type="checkbox"/> <sub>0</sub> |       |
| 颈部及甲状腺                                                  | <input type="checkbox"/> <sub>1</sub> | <input type="checkbox"/> <sub>2</sub> | <input type="checkbox"/> <sub>3</sub> | <input type="checkbox"/> <sub>0</sub> |       |
| 皮肤                                                      | <input type="checkbox"/> <sub>1</sub> | <input type="checkbox"/> <sub>2</sub> | <input type="checkbox"/> <sub>3</sub> | <input type="checkbox"/> <sub>0</sub> |       |
| 心血管系统                                                   | <input type="checkbox"/> <sub>1</sub> | <input type="checkbox"/> <sub>2</sub> | <input type="checkbox"/> <sub>3</sub> | <input type="checkbox"/> <sub>0</sub> |       |
| 胸部及肺                                                    | <input type="checkbox"/> <sub>1</sub> | <input type="checkbox"/> <sub>2</sub> | <input type="checkbox"/> <sub>3</sub> | <input type="checkbox"/> <sub>0</sub> |       |
| 腹部                                                      | <input type="checkbox"/> <sub>1</sub> | <input type="checkbox"/> <sub>2</sub> | <input type="checkbox"/> <sub>3</sub> | <input type="checkbox"/> <sub>0</sub> |       |
| 神经系统                                                    | <input type="checkbox"/> <sub>1</sub> | <input type="checkbox"/> <sub>2</sub> | <input type="checkbox"/> <sub>3</sub> | <input type="checkbox"/> <sub>0</sub> |       |

|                   |             |
|-------------------|-------------|
| 研究方案编号: KY2020-29 | 延伸随访期       |
| 研究中心编号  ___       | 受试者筛选号  ___ |
| 访视 6 (D21±2d)     |             |

|       |                                       |                                       |                                       |                                       |  |
|-------|---------------------------------------|---------------------------------------|---------------------------------------|---------------------------------------|--|
| 骨骼肌系统 | <input type="checkbox"/> <sub>1</sub> | <input type="checkbox"/> <sub>2</sub> | <input type="checkbox"/> <sub>3</sub> | <input type="checkbox"/> <sub>0</sub> |  |
| 淋巴系统  | <input type="checkbox"/> <sub>1</sub> | <input type="checkbox"/> <sub>2</sub> | <input type="checkbox"/> <sub>3</sub> | <input type="checkbox"/> <sub>0</sub> |  |

|                                                                                                         |
|---------------------------------------------------------------------------------------------------------|
| 有无呼吸道症状 <input type="checkbox"/> <sub>0</sub> 未查, 原因_____                                               |
| 检查日期:  ___ 年 ___ 月 ___ 日                                                                                |
| 受试者有无呼吸道症状: <input type="checkbox"/> <sub>0</sub> 无 <input type="checkbox"/> <sub>1</sub> 有, 请描述: _____ |

| 血常规 <input type="checkbox"/> <sub>0</sub> 未查, 原因_____ |                                                                                                           |    |                                       |                                       |                                       |                                       |
|-------------------------------------------------------|-----------------------------------------------------------------------------------------------------------|----|---------------------------------------|---------------------------------------|---------------------------------------|---------------------------------------|
| 采样日期:  ___ 年 ___ 月 ___ 日 正常值范围编号:  ___                |                                                                                                           |    |                                       |                                       |                                       |                                       |
| 检查项目                                                  | 测量结果                                                                                                      |    | 结果判定                                  |                                       |                                       | 未查                                    |
|                                                       | 实测值                                                                                                       | 单位 | 正常                                    | 异常                                    |                                       |                                       |
|                                                       |                                                                                                           |    |                                       | 无临床意义                                 | 有临床意义                                 |                                       |
| 红细胞计数 (RBC)                                           | <input type="checkbox"/> <sub>1</sub> 10 <sup>12</sup> /L <input type="checkbox"/> <sub>2</sub> 其他: _____ |    | <input type="checkbox"/> <sub>1</sub> | <input type="checkbox"/> <sub>2</sub> | <input type="checkbox"/> <sub>3</sub> | <input type="checkbox"/> <sub>0</sub> |
| 白细胞计数 (WBC)                                           | <input type="checkbox"/> <sub>1</sub> 10 <sup>9</sup> /L <input type="checkbox"/> <sub>2</sub> 其他: _____  |    | <input type="checkbox"/> <sub>1</sub> | <input type="checkbox"/> <sub>2</sub> | <input type="checkbox"/> <sub>3</sub> | <input type="checkbox"/> <sub>0</sub> |
| 血红蛋白 (Hb)                                             | <input type="checkbox"/> <sub>1</sub> g/L <input type="checkbox"/> <sub>2</sub> 其他: _____                 |    | <input type="checkbox"/> <sub>1</sub> | <input type="checkbox"/> <sub>2</sub> | <input type="checkbox"/> <sub>3</sub> | <input type="checkbox"/> <sub>0</sub> |
| 血小板计数 (PLT)                                           | <input type="checkbox"/> <sub>1</sub> 10 <sup>9</sup> /L <input type="checkbox"/> <sub>2</sub> 其他: _____  |    | <input type="checkbox"/> <sub>1</sub> | <input type="checkbox"/> <sub>2</sub> | <input type="checkbox"/> <sub>3</sub> | <input type="checkbox"/> <sub>0</sub> |
| 中性粒细胞计数 (ANC)                                         | <input type="checkbox"/> <sub>1</sub> 10 <sup>9</sup> /L <input type="checkbox"/> <sub>2</sub> 其他: _____  |    | <input type="checkbox"/> <sub>1</sub> | <input type="checkbox"/> <sub>2</sub> | <input type="checkbox"/> <sub>3</sub> | <input type="checkbox"/> <sub>0</sub> |
| 淋巴细胞计数 (LY)                                           | <input type="checkbox"/> <sub>1</sub> 10 <sup>9</sup> /L <input type="checkbox"/> <sub>2</sub> 其他: _____  |    | <input type="checkbox"/> <sub>1</sub> | <input type="checkbox"/> <sub>2</sub> | <input type="checkbox"/> <sub>3</sub> | <input type="checkbox"/> <sub>0</sub> |
| 单核细胞计数 (MO)                                           | <input type="checkbox"/> <sub>1</sub> 10 <sup>9</sup> /L <input type="checkbox"/> <sub>2</sub> 其他: _____  |    | <input type="checkbox"/> <sub>1</sub> | <input type="checkbox"/> <sub>2</sub> | <input type="checkbox"/> <sub>3</sub> | <input type="checkbox"/> <sub>0</sub> |
| 嗜酸性粒细胞计数 (EO)                                         | <input type="checkbox"/> <sub>1</sub> 10 <sup>9</sup> /L <input type="checkbox"/> <sub>2</sub> 其他: _____  |    | <input type="checkbox"/> <sub>1</sub> | <input type="checkbox"/> <sub>2</sub> | <input type="checkbox"/> <sub>3</sub> | <input type="checkbox"/> <sub>0</sub> |
| 嗜碱性粒细胞计数 (BA)                                         | <input type="checkbox"/> <sub>1</sub> 10 <sup>9</sup> /L <input type="checkbox"/> <sub>2</sub> 其他: _____  |    | <input type="checkbox"/> <sub>1</sub> | <input type="checkbox"/> <sub>2</sub> | <input type="checkbox"/> <sub>3</sub> | <input type="checkbox"/> <sub>0</sub> |

| 血生化 <input type="checkbox"/> <sub>0</sub> 未查, 原因_____ |                                                                                              |    |                                       |                                       |                                       |                                       |
|-------------------------------------------------------|----------------------------------------------------------------------------------------------|----|---------------------------------------|---------------------------------------|---------------------------------------|---------------------------------------|
| 采样日期:  ___ 年 ___ 月 ___ 日 正常值范围编号:  ___                |                                                                                              |    |                                       |                                       |                                       |                                       |
| 检查项目                                                  | 测量结果                                                                                         |    | 结果判定                                  |                                       |                                       | 未查                                    |
|                                                       | 实测值                                                                                          | 单位 | 正常                                    | 异常                                    |                                       |                                       |
|                                                       |                                                                                              |    |                                       | 无临床意义                                 | 有临床意义                                 |                                       |
| 谷丙转氨酶 (ALT)                                           | <input type="checkbox"/> <sub>1</sub> U/L <input type="checkbox"/> <sub>2</sub> 其他: _____    |    | <input type="checkbox"/> <sub>1</sub> | <input type="checkbox"/> <sub>2</sub> | <input type="checkbox"/> <sub>3</sub> | <input type="checkbox"/> <sub>0</sub> |
| 谷草转氨酶 (AST)                                           | <input type="checkbox"/> <sub>1</sub> U/L <input type="checkbox"/> <sub>2</sub> 其他: _____    |    | <input type="checkbox"/> <sub>1</sub> | <input type="checkbox"/> <sub>2</sub> | <input type="checkbox"/> <sub>3</sub> | <input type="checkbox"/> <sub>0</sub> |
| 总胆红素 (TBIL)                                           | <input type="checkbox"/> <sub>1</sub> μmol/L <input type="checkbox"/> <sub>2</sub> 其他: _____ |    | <input type="checkbox"/> <sub>1</sub> | <input type="checkbox"/> <sub>2</sub> | <input type="checkbox"/> <sub>3</sub> | <input type="checkbox"/> <sub>0</sub> |
| 白蛋白 (ALB)                                             | <input type="checkbox"/> <sub>1</sub> g/L <input type="checkbox"/> <sub>2</sub> 其他: _____    |    | <input type="checkbox"/> <sub>1</sub> | <input type="checkbox"/> <sub>2</sub> | <input type="checkbox"/> <sub>3</sub> | <input type="checkbox"/> <sub>0</sub> |
| γ-谷氨酰转肽酶 (GGT)                                        | <input type="checkbox"/> <sub>1</sub> U/L <input type="checkbox"/> <sub>2</sub> 其他: _____    |    | <input type="checkbox"/> <sub>1</sub> | <input type="checkbox"/> <sub>2</sub> | <input type="checkbox"/> <sub>3</sub> | <input type="checkbox"/> <sub>0</sub> |
| 乳酸脱氢酶 (LDH)                                           | <input type="checkbox"/> <sub>1</sub> U/L <input type="checkbox"/> <sub>2</sub> 其他: _____    |    | <input type="checkbox"/> <sub>1</sub> | <input type="checkbox"/> <sub>2</sub> | <input type="checkbox"/> <sub>3</sub> | <input type="checkbox"/> <sub>0</sub> |





|                   |                    |
|-------------------|--------------------|
| 研究方案编号: KY2020-29 | 延伸随访期              |
| 研究中心编号  __ _      | 受试者筛选号  __ _ _ _ _ |
| 访视 6 (D21±2d)     |                    |

|  |
|--|
|  |
|--|

|                      |                                                                                                                                                                      |
|----------------------|----------------------------------------------------------------------------------------------------------------------------------------------------------------------|
| <b>胸部 CT</b>         | <input type="checkbox"/> <sub>0</sub> 未查, 原因_____                                                                                                                    |
|                      | <input type="checkbox"/> <sub>1</sub> 不适用                                                                                                                            |
| 检查日期:                | __ _ _ _ _ 年 __ _ 月 __ _ 日                                                                                                                                           |
| 检查结果:                | <input type="checkbox"/> <sub>1</sub> 正常 <input type="checkbox"/> <sub>2</sub> 异常无临床意义 <input type="checkbox"/> <sub>3</sub> 异常有临床意义                                 |
| 若异常, 请描述:            | _____                                                                                                                                                                |
| 是否胸部 CT 病灶吸收较基线≥50%? | <input type="checkbox"/> <sub>0</sub> 否 <input type="checkbox"/> <sub>1</sub> 是 <input type="checkbox"/> <sub>2</sub> 无法判断 <input type="checkbox"/> <sub>3</sub> 不适用 |
|                      | <input type="checkbox"/> <sub>4</sub> 其他, 请描述: _____                                                                                                                 |

|                   |                                                                                                                                                                                                                            |
|-------------------|----------------------------------------------------------------------------------------------------------------------------------------------------------------------------------------------------------------------------|
| <b>新型冠状病毒核酸检测</b> | <input type="checkbox"/> <sub>0</sub> 未查, 原因_____                                                                                                                                                                          |
| 采样部位 (可多选)        | <input type="checkbox"/> <sub>0</sub> 上呼吸道 <input type="checkbox"/> <sub>1</sub> 下呼吸道                                                                                                                                      |
| 上呼吸道              | 采样日期:  __ _ _ _ _ 年 __ _ 月 __ _ 日<br>检查结果: <input type="checkbox"/> <sub>1</sub> 阴性 <input type="checkbox"/> <sub>2</sub> 阳性 <input type="checkbox"/> <sub>3</sub> 无法判断 <input type="checkbox"/> <sub>4</sub> 其他, 请描述_____ |
| 下呼吸道              | 采样日期:  __ _ _ _ _ 年 __ _ 月 __ _ 日<br>检查结果: <input type="checkbox"/> <sub>1</sub> 阴性 <input type="checkbox"/> <sub>2</sub> 阳性 <input type="checkbox"/> <sub>3</sub> 无法判断 <input type="checkbox"/> <sub>4</sub> 其他, 请描述_____ |
| 结果判定              | <input type="checkbox"/> <sub>1</sub> 阴性 <input type="checkbox"/> <sub>2</sub> 阳性 <input type="checkbox"/> <sub>3</sub> 无法判断 <input type="checkbox"/> <sub>4</sub> 其他, 请描述_____                                            |

|                        |                                                   |
|------------------------|---------------------------------------------------|
| <b>指脉氧饱和度 (不吸氧情况下)</b> | <input type="checkbox"/> <sub>0</sub> 未查, 原因_____ |
| 检查日期:                  | __ _ _ _ _ 年 __ _ 月 __ _ 日                        |
| 实测值:                   | _____ % (静息状态)                                    |

|                     |                                                                                        |                                                                                    |
|---------------------|----------------------------------------------------------------------------------------|------------------------------------------------------------------------------------|
| <b>是否转成重型/危重型肺炎</b> | <input type="checkbox"/> <sub>0</sub> 未评价                                              | 评价日期 __ _ _ _ _ 年 __ _ 月 __ _ 日                                                    |
| 是否转成重型/危重型肺炎:       | <input type="checkbox"/> <sub>0</sub> 否 <input type="checkbox"/> <sub>1</sub> 是, 临床分型: | <input type="checkbox"/> <sub>1</sub> 重型 <input type="checkbox"/> <sub>2</sub> 危重型 |
| 转成重型/危重型肺炎日期:       | __ _ _ _ _ 年 __ _ 月 __ _ 日                                                             |                                                                                    |

自上次访视以来, 受试者如有不良事件发生, 请填写“不良事件”表; 如有合并药物治疗, 请填写“既往/合并药物治疗”表; 如有合并非药物治疗, 请填写“既往/合并非药物治疗”表; 如有计划外检查, 请填写“计划外检查”表; 如有 IMV/NIV、ECMO、HFNC、HFNC、氧疗, 请填写在“IMV/NIV、ECMO、HFNC、氧疗”表中。



|                   |            |
|-------------------|------------|
| 研究方案编号: KY2020-29 | 延伸随访期      |
| 研究中心编号  __        | 受试者筛选号  __ |
| 访视 7 (D28±2d)     |            |

访视类型: <sub>1</sub> 电话随访      <sub>2</sub> 医院随访

本次访视日期: |\_\_|年|\_\_|月|\_\_|日

如受试者已出院, 以下内容可不进行, 如未进行请留空; 如受试者未出院, 请进行以下检查。

|                                                         |                         |      |                                                                                                                                                                                                                                                                     |
|---------------------------------------------------------|-------------------------|------|---------------------------------------------------------------------------------------------------------------------------------------------------------------------------------------------------------------------------------------------------------------------|
| 生命体征 <input type="checkbox"/> <sub>0</sub> 未查, 原因 _____ |                         |      |                                                                                                                                                                                                                                                                     |
| 检查日期                                                    | __ 年 __ 月 __ 日          |      |                                                                                                                                                                                                                                                                     |
| 日最高体温                                                   | __ . __ °C              | 测量方式 | <input type="checkbox"/> <sub>1</sub> 腋下 <input type="checkbox"/> <sub>2</sub> 口腔 <input type="checkbox"/> <sub>3</sub> 肛门<br><input type="checkbox"/> <sub>4</sub> 耳朵 <input type="checkbox"/> <sub>5</sub> 未知 <input type="checkbox"/> <sub>6</sub> 其他, 请描述 _____ |
| 呼吸频率                                                    | __ 次/分                  | 脉搏   | __ 次/分                                                                                                                                                                                                                                                              |
| 血压                                                      | __ / __  mmHg (收缩压/舒张压) |      |                                                                                                                                                                                                                                                                     |

| 体格检查 <input type="checkbox"/> <sub>0</sub> 未查, 原因 _____ |                                       |                                       |                                       |                                       |       |
|---------------------------------------------------------|---------------------------------------|---------------------------------------|---------------------------------------|---------------------------------------|-------|
| 检查日期:  __ 年 __ 月 __ 日                                   |                                       |                                       |                                       |                                       |       |
| 检查部位                                                    | 检查结果                                  |                                       |                                       |                                       | 异常请描述 |
|                                                         | 1=正常                                  | 2=异常无临床意义                             | 3=异常有临床意义                             | 0=未查                                  |       |
| 整体外观                                                    | <input type="checkbox"/> <sub>1</sub> | <input type="checkbox"/> <sub>2</sub> | <input type="checkbox"/> <sub>3</sub> | <input type="checkbox"/> <sub>0</sub> |       |
| 头                                                       | <input type="checkbox"/> <sub>1</sub> | <input type="checkbox"/> <sub>2</sub> | <input type="checkbox"/> <sub>3</sub> | <input type="checkbox"/> <sub>0</sub> |       |
| 眼                                                       | <input type="checkbox"/> <sub>1</sub> | <input type="checkbox"/> <sub>2</sub> | <input type="checkbox"/> <sub>3</sub> | <input type="checkbox"/> <sub>0</sub> |       |
| 耳                                                       | <input type="checkbox"/> <sub>1</sub> | <input type="checkbox"/> <sub>2</sub> | <input type="checkbox"/> <sub>3</sub> | <input type="checkbox"/> <sub>0</sub> |       |
| 鼻                                                       | <input type="checkbox"/> <sub>1</sub> | <input type="checkbox"/> <sub>2</sub> | <input type="checkbox"/> <sub>3</sub> | <input type="checkbox"/> <sub>0</sub> |       |
| 喉                                                       | <input type="checkbox"/> <sub>1</sub> | <input type="checkbox"/> <sub>2</sub> | <input type="checkbox"/> <sub>3</sub> | <input type="checkbox"/> <sub>0</sub> |       |
| 颈部及甲状腺                                                  | <input type="checkbox"/> <sub>1</sub> | <input type="checkbox"/> <sub>2</sub> | <input type="checkbox"/> <sub>3</sub> | <input type="checkbox"/> <sub>0</sub> |       |
| 皮肤                                                      | <input type="checkbox"/> <sub>1</sub> | <input type="checkbox"/> <sub>2</sub> | <input type="checkbox"/> <sub>3</sub> | <input type="checkbox"/> <sub>0</sub> |       |
| 心血管系统                                                   | <input type="checkbox"/> <sub>1</sub> | <input type="checkbox"/> <sub>2</sub> | <input type="checkbox"/> <sub>3</sub> | <input type="checkbox"/> <sub>0</sub> |       |
| 胸部及肺                                                    | <input type="checkbox"/> <sub>1</sub> | <input type="checkbox"/> <sub>2</sub> | <input type="checkbox"/> <sub>3</sub> | <input type="checkbox"/> <sub>0</sub> |       |
| 腹部                                                      | <input type="checkbox"/> <sub>1</sub> | <input type="checkbox"/> <sub>2</sub> | <input type="checkbox"/> <sub>3</sub> | <input type="checkbox"/> <sub>0</sub> |       |
| 神经系统                                                    | <input type="checkbox"/> <sub>1</sub> | <input type="checkbox"/> <sub>2</sub> | <input type="checkbox"/> <sub>3</sub> | <input type="checkbox"/> <sub>0</sub> |       |

|                   |            |
|-------------------|------------|
| 研究方案编号: KY2020-29 | 延伸随访期      |
| 研究中心编号  __        | 受试者筛选号  __ |
| 访视 7 (D28±2d)     |            |

|       |                                       |                                       |                                       |                                       |  |
|-------|---------------------------------------|---------------------------------------|---------------------------------------|---------------------------------------|--|
| 骨骼肌系统 | <input type="checkbox"/> <sub>1</sub> | <input type="checkbox"/> <sub>2</sub> | <input type="checkbox"/> <sub>3</sub> | <input type="checkbox"/> <sub>0</sub> |  |
| 淋巴系统  | <input type="checkbox"/> <sub>1</sub> | <input type="checkbox"/> <sub>2</sub> | <input type="checkbox"/> <sub>3</sub> | <input type="checkbox"/> <sub>0</sub> |  |

**有无呼吸道症状** <sub>0</sub> 未查, 原因 \_\_\_\_\_

检查日期: |\_\_| |\_\_| |\_\_| |\_\_| 年 |\_\_| |\_\_| 月 |\_\_| |\_\_| 日

受试者有无呼吸道症状: <sub>0</sub> 无 <sub>1</sub> 有, 请描述: \_\_\_\_\_

**血常规** <sub>0</sub> 未查, 原因 \_\_\_\_\_

采样日期: |\_\_| |\_\_| |\_\_| |\_\_| 年 |\_\_| |\_\_| 月 |\_\_| |\_\_| 日 正常值范围编号: |\_\_| |\_\_| |\_\_| |\_\_|

| 检查项目          | 测量结果                                                      |                                                 | 结果判定                                  |                                       |                                       | 未查                                    |
|---------------|-----------------------------------------------------------|-------------------------------------------------|---------------------------------------|---------------------------------------|---------------------------------------|---------------------------------------|
|               | 实测值                                                       | 单位                                              | 正常                                    | 异常                                    |                                       |                                       |
|               |                                                           |                                                 |                                       | 无临床意义                                 | 有临床意义                                 |                                       |
| 红细胞计数 (RBC)   | <input type="checkbox"/> <sub>1</sub> 10 <sup>12</sup> /L | <input type="checkbox"/> <sub>2</sub> 其他: _____ | <input type="checkbox"/> <sub>1</sub> | <input type="checkbox"/> <sub>2</sub> | <input type="checkbox"/> <sub>3</sub> | <input type="checkbox"/> <sub>0</sub> |
| 白细胞计数 (WBC)   | <input type="checkbox"/> <sub>1</sub> 10 <sup>9</sup> /L  | <input type="checkbox"/> <sub>2</sub> 其他: _____ | <input type="checkbox"/> <sub>1</sub> | <input type="checkbox"/> <sub>2</sub> | <input type="checkbox"/> <sub>3</sub> | <input type="checkbox"/> <sub>0</sub> |
| 血红蛋白 (Hb)     | <input type="checkbox"/> <sub>1</sub> g/L                 | <input type="checkbox"/> <sub>2</sub> 其他: _____ | <input type="checkbox"/> <sub>1</sub> | <input type="checkbox"/> <sub>2</sub> | <input type="checkbox"/> <sub>3</sub> | <input type="checkbox"/> <sub>0</sub> |
| 血小板计数 (PLT)   | <input type="checkbox"/> <sub>1</sub> 10 <sup>9</sup> /L  | <input type="checkbox"/> <sub>2</sub> 其他: _____ | <input type="checkbox"/> <sub>1</sub> | <input type="checkbox"/> <sub>2</sub> | <input type="checkbox"/> <sub>3</sub> | <input type="checkbox"/> <sub>0</sub> |
| 中性粒细胞计数 (ANC) | <input type="checkbox"/> <sub>1</sub> 10 <sup>9</sup> /L  | <input type="checkbox"/> <sub>2</sub> 其他: _____ | <input type="checkbox"/> <sub>1</sub> | <input type="checkbox"/> <sub>2</sub> | <input type="checkbox"/> <sub>3</sub> | <input type="checkbox"/> <sub>0</sub> |
| 淋巴细胞计数 (LY)   | <input type="checkbox"/> <sub>1</sub> 10 <sup>9</sup> /L  | <input type="checkbox"/> <sub>2</sub> 其他: _____ | <input type="checkbox"/> <sub>1</sub> | <input type="checkbox"/> <sub>2</sub> | <input type="checkbox"/> <sub>3</sub> | <input type="checkbox"/> <sub>0</sub> |
| 单核细胞计数 (MO)   | <input type="checkbox"/> <sub>1</sub> 10 <sup>9</sup> /L  | <input type="checkbox"/> <sub>2</sub> 其他: _____ | <input type="checkbox"/> <sub>1</sub> | <input type="checkbox"/> <sub>2</sub> | <input type="checkbox"/> <sub>3</sub> | <input type="checkbox"/> <sub>0</sub> |
| 嗜酸性粒细胞计数 (EO) | <input type="checkbox"/> <sub>1</sub> 10 <sup>9</sup> /L  | <input type="checkbox"/> <sub>2</sub> 其他: _____ | <input type="checkbox"/> <sub>1</sub> | <input type="checkbox"/> <sub>2</sub> | <input type="checkbox"/> <sub>3</sub> | <input type="checkbox"/> <sub>0</sub> |
| 嗜碱性粒细胞计数 (BA) | <input type="checkbox"/> <sub>1</sub> 10 <sup>9</sup> /L  | <input type="checkbox"/> <sub>2</sub> 其他: _____ | <input type="checkbox"/> <sub>1</sub> | <input type="checkbox"/> <sub>2</sub> | <input type="checkbox"/> <sub>3</sub> | <input type="checkbox"/> <sub>0</sub> |

**血生化** <sub>0</sub> 未查, 原因 \_\_\_\_\_

采样日期: |\_\_| |\_\_| |\_\_| |\_\_| 年 |\_\_| |\_\_| 月 |\_\_| |\_\_| 日 正常值范围编号: |\_\_| |\_\_| |\_\_| |\_\_|

| 检查项目           | 测量结果                                         |                                                 | 结果判定                                  |                                       |                                       | 未查                                    |
|----------------|----------------------------------------------|-------------------------------------------------|---------------------------------------|---------------------------------------|---------------------------------------|---------------------------------------|
|                | 实测值                                          | 单位                                              | 正常                                    | 异常                                    |                                       |                                       |
|                |                                              |                                                 |                                       | 无临床意义                                 | 有临床意义                                 |                                       |
| 谷丙转氨酶 (ALT)    | <input type="checkbox"/> <sub>1</sub> U/L    | <input type="checkbox"/> <sub>2</sub> 其他: _____ | <input type="checkbox"/> <sub>1</sub> | <input type="checkbox"/> <sub>2</sub> | <input type="checkbox"/> <sub>3</sub> | <input type="checkbox"/> <sub>0</sub> |
| 谷草转氨酶 (AST)    | <input type="checkbox"/> <sub>1</sub> U/L    | <input type="checkbox"/> <sub>2</sub> 其他: _____ | <input type="checkbox"/> <sub>1</sub> | <input type="checkbox"/> <sub>2</sub> | <input type="checkbox"/> <sub>3</sub> | <input type="checkbox"/> <sub>0</sub> |
| 总胆红素 (TBIL)    | <input type="checkbox"/> <sub>1</sub> μmol/L | <input type="checkbox"/> <sub>2</sub> 其他: _____ | <input type="checkbox"/> <sub>1</sub> | <input type="checkbox"/> <sub>2</sub> | <input type="checkbox"/> <sub>3</sub> | <input type="checkbox"/> <sub>0</sub> |
| 白蛋白 (ALB)      | <input type="checkbox"/> <sub>1</sub> g/L    | <input type="checkbox"/> <sub>2</sub> 其他: _____ | <input type="checkbox"/> <sub>1</sub> | <input type="checkbox"/> <sub>2</sub> | <input type="checkbox"/> <sub>3</sub> | <input type="checkbox"/> <sub>0</sub> |
| γ-谷氨酰转肽酶 (GGT) | <input type="checkbox"/> <sub>1</sub> U/L    | <input type="checkbox"/> <sub>2</sub> 其他: _____ | <input type="checkbox"/> <sub>1</sub> | <input type="checkbox"/> <sub>2</sub> | <input type="checkbox"/> <sub>3</sub> | <input type="checkbox"/> <sub>0</sub> |
| 乳酸脱氢酶 (LDH)    | <input type="checkbox"/> <sub>1</sub> U/L    | <input type="checkbox"/> <sub>2</sub> 其他: _____ | <input type="checkbox"/> <sub>1</sub> | <input type="checkbox"/> <sub>2</sub> | <input type="checkbox"/> <sub>3</sub> | <input type="checkbox"/> <sub>0</sub> |

|                   |            |
|-------------------|------------|
| 研究方案编号: KY2020-29 | 延伸随访期      |
| 研究中心编号  __        | 受试者筛选号  __ |
| 访视 7 (D28±2d)     |            |

|                 |                                                                                             |                                       |                                       |                                       |                                       |
|-----------------|---------------------------------------------------------------------------------------------|---------------------------------------|---------------------------------------|---------------------------------------|---------------------------------------|
| 肌酸激酶 (CK)       | <input type="checkbox"/> <sub>1</sub> U/L <input type="checkbox"/> <sub>2</sub> 其他: ____    | <input type="checkbox"/> <sub>1</sub> | <input type="checkbox"/> <sub>2</sub> | <input type="checkbox"/> <sub>3</sub> | <input type="checkbox"/> <sub>0</sub> |
| 肌酸激酶同工酶 (CK-MB) | <input type="checkbox"/> <sub>1</sub> U/L <input type="checkbox"/> <sub>2</sub> 其他: ____    | <input type="checkbox"/> <sub>1</sub> | <input type="checkbox"/> <sub>2</sub> | <input type="checkbox"/> <sub>3</sub> | <input type="checkbox"/> <sub>0</sub> |
| 血尿素氮 (BUN)      | <input type="checkbox"/> <sub>1</sub> mmol/L <input type="checkbox"/> <sub>2</sub> 其他: ____ | <input type="checkbox"/> <sub>1</sub> | <input type="checkbox"/> <sub>2</sub> | <input type="checkbox"/> <sub>3</sub> | <input type="checkbox"/> <sub>0</sub> |
| 尿素 (Urea)       | <input type="checkbox"/> <sub>1</sub> mmol/L <input type="checkbox"/> <sub>2</sub> 其他: ____ | <input type="checkbox"/> <sub>1</sub> | <input type="checkbox"/> <sub>2</sub> | <input type="checkbox"/> <sub>3</sub> | <input type="checkbox"/> <sub>0</sub> |
| 血肌酐 (CR)        | <input type="checkbox"/> <sub>1</sub> μmol/L <input type="checkbox"/> <sub>2</sub> 其他: ____ | <input type="checkbox"/> <sub>1</sub> | <input type="checkbox"/> <sub>2</sub> | <input type="checkbox"/> <sub>3</sub> | <input type="checkbox"/> <sub>0</sub> |

| 尿常规 <input type="checkbox"/> <sub>0</sub> 未查, 原因 _____ |                                                                                             |    |                                       |                                       |                                       |                                       |
|--------------------------------------------------------|---------------------------------------------------------------------------------------------|----|---------------------------------------|---------------------------------------|---------------------------------------|---------------------------------------|
| 采样日期:  __   __   __  年  __   __  月  __   __  日         |                                                                                             |    |                                       | 正常值范围编号:  __   __   __   __           |                                       |                                       |
| 检查项目                                                   | 测量结果                                                                                        |    | 结果判定                                  |                                       |                                       | 未查                                    |
|                                                        | 实测值                                                                                         | 单位 | 正常                                    | 异常                                    |                                       |                                       |
|                                                        |                                                                                             |    |                                       | 无临床意义                                 | 有临床意义                                 |                                       |
| 尿蛋白                                                    | <input type="checkbox"/> <sub>1</sub> 不适用 <input type="checkbox"/> <sub>2</sub> 其他: ____    |    | <input type="checkbox"/> <sub>1</sub> | <input type="checkbox"/> <sub>2</sub> | <input type="checkbox"/> <sub>3</sub> | <input type="checkbox"/> <sub>0</sub> |
| 尿葡萄糖                                                   | <input type="checkbox"/> <sub>1</sub> mmol/L <input type="checkbox"/> <sub>2</sub> 其他: ____ |    | <input type="checkbox"/> <sub>1</sub> | <input type="checkbox"/> <sub>2</sub> | <input type="checkbox"/> <sub>3</sub> | <input type="checkbox"/> <sub>0</sub> |
| 尿 PH 值                                                 | <input type="checkbox"/> <sub>1</sub> 不适用 <input type="checkbox"/> <sub>2</sub> 其他: ____    |    | <input type="checkbox"/> <sub>1</sub> | <input type="checkbox"/> <sub>2</sub> | <input type="checkbox"/> <sub>3</sub> | <input type="checkbox"/> <sub>0</sub> |
| 尿红细胞                                                   | <input type="checkbox"/> <sub>1</sub> 不适用 <input type="checkbox"/> <sub>2</sub> 其他: ____    |    | <input type="checkbox"/> <sub>1</sub> | <input type="checkbox"/> <sub>2</sub> | <input type="checkbox"/> <sub>3</sub> | <input type="checkbox"/> <sub>0</sub> |
| 尿白细胞                                                   | <input type="checkbox"/> <sub>1</sub> 不适用 <input type="checkbox"/> <sub>2</sub> 其他: ____    |    | <input type="checkbox"/> <sub>1</sub> | <input type="checkbox"/> <sub>2</sub> | <input type="checkbox"/> <sub>3</sub> | <input type="checkbox"/> <sub>0</sub> |
| 尿酮体                                                    | <input type="checkbox"/> <sub>1</sub> 不适用 <input type="checkbox"/> <sub>2</sub> 其他: ____    |    | <input type="checkbox"/> <sub>1</sub> | <input type="checkbox"/> <sub>2</sub> | <input type="checkbox"/> <sub>3</sub> | <input type="checkbox"/> <sub>0</sub> |

| 凝血功能 <input type="checkbox"/> <sub>0</sub> 未查, 原因 _____ |                                                                                          |    |                                       |                                       |                                       |                                       |
|---------------------------------------------------------|------------------------------------------------------------------------------------------|----|---------------------------------------|---------------------------------------|---------------------------------------|---------------------------------------|
| 采样日期:  __   __   __  年  __   __  月  __   __  日          |                                                                                          |    |                                       | 正常值范围编号:  __   __   __   __           |                                       |                                       |
| 检查项目                                                    | 测量结果                                                                                     |    | 结果判定                                  |                                       |                                       | 未查                                    |
|                                                         | 实测值                                                                                      | 单位 | 正常                                    | 异常                                    |                                       |                                       |
|                                                         |                                                                                          |    |                                       | 无临床意义                                 | 有临床意义                                 |                                       |
| 凝血酶原时间 (PT)                                             | <input type="checkbox"/> <sub>1</sub> S <input type="checkbox"/> <sub>2</sub> 其他: ____   |    | <input type="checkbox"/> <sub>1</sub> | <input type="checkbox"/> <sub>2</sub> | <input type="checkbox"/> <sub>3</sub> | <input type="checkbox"/> <sub>0</sub> |
| 活化部分凝血活酶时间 (APTT)                                       | <input type="checkbox"/> <sub>1</sub> S <input type="checkbox"/> <sub>2</sub> 其他: ____   |    | <input type="checkbox"/> <sub>1</sub> | <input type="checkbox"/> <sub>2</sub> | <input type="checkbox"/> <sub>3</sub> | <input type="checkbox"/> <sub>0</sub> |
| 凝血酶时间 (TT)                                              | <input type="checkbox"/> <sub>1</sub> S <input type="checkbox"/> <sub>2</sub> 其他: ____   |    | <input type="checkbox"/> <sub>1</sub> | <input type="checkbox"/> <sub>2</sub> | <input type="checkbox"/> <sub>3</sub> | <input type="checkbox"/> <sub>0</sub> |
| 血浆纤维蛋白原 (Fbg)                                           | <input type="checkbox"/> <sub>1</sub> g/L <input type="checkbox"/> <sub>2</sub> 其他: ____ |    | <input type="checkbox"/> <sub>1</sub> | <input type="checkbox"/> <sub>2</sub> | <input type="checkbox"/> <sub>3</sub> | <input type="checkbox"/> <sub>0</sub> |
| 国际标准化比率 (INR)                                           | <input type="checkbox"/> <sub>1</sub> 不适用 <input type="checkbox"/> <sub>2</sub> 其他: ____ |    | <input type="checkbox"/> <sub>1</sub> | <input type="checkbox"/> <sub>2</sub> | <input type="checkbox"/> <sub>3</sub> | <input type="checkbox"/> <sub>0</sub> |

| C 反应蛋白 (CRP) <input type="checkbox"/> <sub>0</sub> 未查, 原因 _____ |      |    |      |                             |  |  |
|-----------------------------------------------------------------|------|----|------|-----------------------------|--|--|
| 采样日期:  __   __   __  年  __   __  月  __   __  日                  |      |    |      | 正常值范围编号:  __   __   __   __ |  |  |
| 检查项目                                                            | 测量结果 |    | 结果判定 |                             |  |  |
|                                                                 | 实测值  | 单位 | 正常   | 异常                          |  |  |

|                   |               |
|-------------------|---------------|
| 研究方案编号: KY2020-29 | 延伸随访期         |
| 研究中心编号  __        | 受试者筛选号  __    |
|                   | 访视 7 (D28±2d) |

|              |                                            |                                                |                                       |                                       |                                       |
|--------------|--------------------------------------------|------------------------------------------------|---------------------------------------|---------------------------------------|---------------------------------------|
| C 反应蛋白 (CRP) |                                            |                                                |                                       | 无临床意义                                 | 有临床意义                                 |
|              | <input type="checkbox"/> <sub>1</sub> mg/L | <input type="checkbox"/> <sub>2</sub> 其他: ____ | <input type="checkbox"/> <sub>1</sub> | <input type="checkbox"/> <sub>2</sub> | <input type="checkbox"/> <sub>3</sub> |

|                                                            |      |                                                                                           |              |                                       |                                       |
|------------------------------------------------------------|------|-------------------------------------------------------------------------------------------|--------------|---------------------------------------|---------------------------------------|
| 血沉 (ESR) <input type="checkbox"/> <sub>0</sub> 未查, 原因_____ |      |                                                                                           |              |                                       |                                       |
| 采样日期:  __ 年 __ 月 __ 日                                      |      |                                                                                           | 正常值范围编号:  __ |                                       |                                       |
| 检查项目                                                       | 测量结果 |                                                                                           | 结果判定         |                                       |                                       |
| 血沉 (ESR)                                                   | 实测值  | 单位                                                                                        | 正常           | 异常                                    |                                       |
|                                                            |      | <input type="checkbox"/> <sub>1</sub> mm/h <input type="checkbox"/> <sub>2</sub> 其他: ____ |              | <input type="checkbox"/> <sub>1</sub> | 无临床意义                                 |
|                                                            |      |                                                                                           |              | <input type="checkbox"/> <sub>2</sub> | <input type="checkbox"/> <sub>3</sub> |

|                                                         |      |                                                                                            |              |                                       |                                       |
|---------------------------------------------------------|------|--------------------------------------------------------------------------------------------|--------------|---------------------------------------|---------------------------------------|
| TNF-α <input type="checkbox"/> <sub>0</sub> 未查, 原因_____ |      |                                                                                            |              |                                       |                                       |
| 采样日期:  __ 年 __ 月 __ 日                                   |      |                                                                                            | 正常值范围编号:  __ |                                       |                                       |
| 检查项目                                                    | 测量结果 |                                                                                            | 结果判定         |                                       |                                       |
| TNF-α                                                   | 实测值  | 单位                                                                                         | 正常           | 异常                                    |                                       |
|                                                         |      | <input type="checkbox"/> <sub>1</sub> pg/mL <input type="checkbox"/> <sub>2</sub> 其他: ____ |              | <input type="checkbox"/> <sub>1</sub> | 无临床意义                                 |
|                                                         |      |                                                                                            |              | <input type="checkbox"/> <sub>2</sub> | <input type="checkbox"/> <sub>3</sub> |

|                                                        |      |                                                                                            |              |                                       |                                       |
|--------------------------------------------------------|------|--------------------------------------------------------------------------------------------|--------------|---------------------------------------|---------------------------------------|
| IL-6 <input type="checkbox"/> <sub>0</sub> 未查, 原因_____ |      |                                                                                            |              |                                       |                                       |
| 采样日期:  __ 年 __ 月 __ 日                                  |      |                                                                                            | 正常值范围编号:  __ |                                       |                                       |
| 检查项目                                                   | 测量结果 |                                                                                            | 结果判定         |                                       |                                       |
| IL-6                                                   | 实测值  | 单位                                                                                         | 正常           | 异常                                    |                                       |
|                                                        |      | <input type="checkbox"/> <sub>1</sub> pg/mL <input type="checkbox"/> <sub>2</sub> 其他: ____ |              | <input type="checkbox"/> <sub>1</sub> | 无临床意义                                 |
|                                                        |      |                                                                                            |              | <input type="checkbox"/> <sub>2</sub> | <input type="checkbox"/> <sub>3</sub> |

|                                                                                                                                            |  |  |  |  |  |
|--------------------------------------------------------------------------------------------------------------------------------------------|--|--|--|--|--|
| 12 导联心电图 <input type="checkbox"/> <sub>0</sub> 未查, 原因_____                                                                                 |  |  |  |  |  |
| 检查日期:  __ 年 __ 月 __ 日                                                                                                                      |  |  |  |  |  |
| 检查结果: <input type="checkbox"/> <sub>1</sub> 正常 <input type="checkbox"/> <sub>2</sub> 异常无临床意义 <input type="checkbox"/> <sub>3</sub> 异常有临床意义 |  |  |  |  |  |
| 若“异常”, 请描述: _____                                                                                                                          |  |  |  |  |  |

|                                                                                                                                            |  |  |  |  |  |
|--------------------------------------------------------------------------------------------------------------------------------------------|--|--|--|--|--|
| 胸部 CT <input type="checkbox"/> <sub>0</sub> 未查, 原因_____                                                                                    |  |  |  |  |  |
| <input type="checkbox"/> <sub>1</sub> 不适用                                                                                                  |  |  |  |  |  |
| 检查日期:  __ 年 __ 月 __ 日                                                                                                                      |  |  |  |  |  |
| 检查结果: <input type="checkbox"/> <sub>1</sub> 正常 <input type="checkbox"/> <sub>2</sub> 异常无临床意义 <input type="checkbox"/> <sub>3</sub> 异常有临床意义 |  |  |  |  |  |

|                   |                                     |
|-------------------|-------------------------------------|
| 研究方案编号: KY2020-29 | 延伸随访期                               |
| 研究中心编号  __        | 受试者筛选号  __   __   __   __   __   __ |
| 访视 7 (D28±2d)     |                                     |

若异常, 请描述: \_\_\_\_\_

是否胸部 CT 病灶吸收较基线≥50%? 0 否 1 是 2 无法判断 3 不适用  
4 其他, 请描述: \_\_\_\_\_

|                                                          |                                                                                                                                                                                                  |
|----------------------------------------------------------|--------------------------------------------------------------------------------------------------------------------------------------------------------------------------------------------------|
| <b>新型冠状病毒核酸检测</b> <input type="checkbox"/> 0 未查, 原因_____ |                                                                                                                                                                                                  |
| 采样部位 (可多选)                                               | <input type="checkbox"/> 0 上呼吸道 <input type="checkbox"/> 1 下呼吸道                                                                                                                                  |
| 上呼吸道                                                     | 采样日期:  __   __   __   __  年  __   __  月  __   __  日<br>检查结果: <input type="checkbox"/> 1 阴性 <input type="checkbox"/> 2 阳性 <input type="checkbox"/> 3 无法判断 <input type="checkbox"/> 4 其他, 请描述_____ |
| 下呼吸道                                                     | 采样日期:  __   __   __   __  年  __   __  月  __   __  日<br>检查结果: <input type="checkbox"/> 1 阴性 <input type="checkbox"/> 2 阳性 <input type="checkbox"/> 3 无法判断 <input type="checkbox"/> 4 其他, 请描述_____ |
| 结果判定                                                     | <input type="checkbox"/> 1 阴性 <input type="checkbox"/> 2 阳性 <input type="checkbox"/> 3 无法判断 <input type="checkbox"/> 4 其他, 请描述_____                                                              |

|                                                               |
|---------------------------------------------------------------|
| <b>指脉氧饱和度 (不吸氧情况下)</b> <input type="checkbox"/> 0 未查, 原因_____ |
| 检查日期:  __   __   __   __  年  __   __  月  __   __  日           |
| 实测值: _____% (静息状态)                                            |

|                                                                                                                                             |
|---------------------------------------------------------------------------------------------------------------------------------------------|
| <b>是否转成重型/危重型肺炎</b> <input type="checkbox"/> 0 未评价 评价日期  __   __   __   __  年  __   __  月  __   __  日                                       |
| 是否转成重型/危重型肺炎: <input type="checkbox"/> 0 否 <input type="checkbox"/> 1 是, 临床分型: <input type="checkbox"/> 1 重型 <input type="checkbox"/> 2 危重型 |
| 转成重型/危重型肺炎日期:  __   __   __   __  年  __   __  月  __   __  日                                                                                 |

自上次访视以来, 受试者如有不良事件发生, 请填写“不良事件”表; 如有合并药物治疗, 请填写“既往/合并药物治疗”表; 如有合并非药物治疗, 请填写“既往/合并非药物治疗”表; 如有计划外检查, 请填写“计划外检查”表。; 如有 IMV/NIV、ECMO、HFNC、氧疗, 请填写在“IMV/NIV、ECMO、HFNC、氧疗”表中。

|                                                                                            |                 |
|--------------------------------------------------------------------------------------------|-----------------|
| 研究方案编号: KY2020-29                                                                          | <b>试验药物使用情况</b> |
| 研究中心编号 <input type="text"/> <input type="text"/> <input type="text"/> <input type="text"/> |                 |

受试者是否使用试验药物?      <sub>0</sub> 否      <sub>1</sub> 是      <sub>2</sub> 不适用 (对照组)

**试验药物使用情况**

| 服药天数 | 是否用药                                                                               | 用药日期                                                                    | 计划每日给药<br>总剂量 (mg)   | 实际每日给药<br>总剂量 (mg)   | 给药频率<br>(1)          | 给药情况<br>(2)          | 如剂量调整或暂停给药, 请<br>说明原因                                                                                 | 如漏服、<br>多服, 或<br>其他情况<br>请说明 |
|------|------------------------------------------------------------------------------------|-------------------------------------------------------------------------|----------------------|----------------------|----------------------|----------------------|-------------------------------------------------------------------------------------------------------|------------------------------|
| 第__天 | <input type="checkbox"/> <sub>0</sub> 否<br><input type="checkbox"/> <sub>1</sub> 是 | <input type="text"/> 年 <input type="text"/> 月<br><input type="text"/> 日 | <input type="text"/> | <input type="text"/> | <input type="text"/> | <input type="text"/> | <input type="checkbox"/> <sub>1</sub> 不良事件, 编号: __<br><input type="checkbox"/> <sub>2</sub> 其他: _____ |                              |
| 第__天 | <input type="checkbox"/> <sub>0</sub> 否<br><input type="checkbox"/> <sub>1</sub> 是 | <input type="text"/> 年 <input type="text"/> 月<br><input type="text"/> 日 | <input type="text"/> | <input type="text"/> | <input type="text"/> | <input type="text"/> | <input type="checkbox"/> <sub>1</sub> 不良事件, 编号: __<br><input type="checkbox"/> <sub>2</sub> 其他: _____ |                              |
| 第__天 | <input type="checkbox"/> <sub>0</sub> 否<br><input type="checkbox"/> <sub>1</sub> 是 | <input type="text"/> 年 <input type="text"/> 月<br><input type="text"/> 日 | <input type="text"/> | <input type="text"/> | <input type="text"/> | <input type="text"/> | <input type="checkbox"/> <sub>1</sub> 不良事件, 编号: __<br><input type="checkbox"/> <sub>2</sub> 其他: _____ |                              |
| 第__天 | <input type="checkbox"/> <sub>0</sub> 否<br><input type="checkbox"/> <sub>1</sub> 是 | <input type="text"/> 年 <input type="text"/> 月<br><input type="text"/> 日 | <input type="text"/> | <input type="text"/> | <input type="text"/> | <input type="text"/> | <input type="checkbox"/> <sub>1</sub> 不良事件, 编号: __<br><input type="checkbox"/> <sub>2</sub> 其他: _____ |                              |
| 第__天 | <input type="checkbox"/> <sub>0</sub> 否<br><input type="checkbox"/> <sub>1</sub> 是 | <input type="text"/> 年 <input type="text"/> 月<br><input type="text"/> 日 | <input type="text"/> | <input type="text"/> | <input type="text"/> | <input type="text"/> | <input type="checkbox"/> <sub>1</sub> 不良事件, 编号: __<br><input type="checkbox"/> <sub>2</sub> 其他: _____ |                              |
| 第__天 | <input type="checkbox"/> <sub>0</sub> 否<br><input type="checkbox"/> <sub>1</sub> 是 | <input type="text"/> 年 <input type="text"/> 月<br><input type="text"/> 日 | <input type="text"/> | <input type="text"/> | <input type="text"/> | <input type="text"/> | <input type="checkbox"/> <sub>1</sub> 不良事件, 编号: __<br><input type="checkbox"/> <sub>2</sub> 其他: _____ |                              |
| 第__天 | <input type="checkbox"/> <sub>0</sub> 否<br><input type="checkbox"/> <sub>1</sub> 是 | <input type="text"/> 年 <input type="text"/> 月<br><input type="text"/> 日 | <input type="text"/> | <input type="text"/> | <input type="text"/> | <input type="text"/> | <input type="checkbox"/> <sub>1</sub> 不良事件, 编号: __<br><input type="checkbox"/> <sub>2</sub> 其他: _____ |                              |
| 第__天 | <input type="checkbox"/> <sub>0</sub> 否<br><input type="checkbox"/> <sub>1</sub> 是 | <input type="text"/> 年 <input type="text"/> 月<br><input type="text"/> 日 | <input type="text"/> | <input type="text"/> | <input type="text"/> | <input type="text"/> | <input type="checkbox"/> <sub>1</sub> 不良事件, 编号: __<br><input type="checkbox"/> <sub>2</sub> 其他: _____ |                              |

(1) 给药频率: 1=每日三次 2=每日两次 3=每日一次 4=未知 5=其他, 请在横线处具体描述  
(2) 给药情况: 1=不适用 2=剂量调整 3=漏服 4=多服 5=暂停给药 6=其他, 请在横线处具体描述

|                                                                                                                                                                                |                 |
|--------------------------------------------------------------------------------------------------------------------------------------------------------------------------------|-----------------|
| 研究方案编号: KY2020-29                                                                                                                                                              | <b>试验药物使用情况</b> |
| 研究中心编号 <input type="text"/> |                 |

| 试验药物使用情况 |                                                                                    |                                                                      |                      |                      |                      |                      |                                                                                                       |                  |
|----------|------------------------------------------------------------------------------------|----------------------------------------------------------------------|----------------------|----------------------|----------------------|----------------------|-------------------------------------------------------------------------------------------------------|------------------|
| 服药天数     | 是否用药                                                                               | 用药日期                                                                 | 计划每日给药总剂量 (mg)       | 实际每日给药总剂量 (mg)       | 给药频率 (1)             | 给药情况 (2)             | 如剂量调整或暂停给药, 请说明原因                                                                                     | 如漏服、多服, 或其他情况请说明 |
| 第__天     | <input type="checkbox"/> <sub>0</sub> 否<br><input type="checkbox"/> <sub>1</sub> 是 | <input type="text"/> 年 <input type="text"/> 月 <input type="text"/> 日 | <input type="text"/> | <input type="text"/> | <input type="text"/> | <input type="text"/> | <input type="checkbox"/> <sub>1</sub> 不良事件, 编号: __<br><input type="checkbox"/> <sub>2</sub> 其他: _____ |                  |
| 第__天     | <input type="checkbox"/> <sub>0</sub> 否<br><input type="checkbox"/> <sub>1</sub> 是 | <input type="text"/> 年 <input type="text"/> 月 <input type="text"/> 日 | <input type="text"/> | <input type="text"/> | <input type="text"/> | <input type="text"/> | <input type="checkbox"/> <sub>1</sub> 不良事件, 编号: __<br><input type="checkbox"/> <sub>2</sub> 其他: _____ |                  |
| 第__天     | <input type="checkbox"/> <sub>0</sub> 否<br><input type="checkbox"/> <sub>1</sub> 是 | <input type="text"/> 年 <input type="text"/> 月 <input type="text"/> 日 | <input type="text"/> | <input type="text"/> | <input type="text"/> | <input type="text"/> | <input type="checkbox"/> <sub>1</sub> 不良事件, 编号: __<br><input type="checkbox"/> <sub>2</sub> 其他: _____ |                  |
| 第__天     | <input type="checkbox"/> <sub>0</sub> 否<br><input type="checkbox"/> <sub>1</sub> 是 | <input type="text"/> 年 <input type="text"/> 月 <input type="text"/> 日 | <input type="text"/> | <input type="text"/> | <input type="text"/> | <input type="text"/> | <input type="checkbox"/> <sub>1</sub> 不良事件, 编号: __<br><input type="checkbox"/> <sub>2</sub> 其他: _____ |                  |
| 第__天     | <input type="checkbox"/> <sub>0</sub> 否<br><input type="checkbox"/> <sub>1</sub> 是 | <input type="text"/> 年 <input type="text"/> 月 <input type="text"/> 日 | <input type="text"/> | <input type="text"/> | <input type="text"/> | <input type="text"/> | <input type="checkbox"/> <sub>1</sub> 不良事件, 编号: __<br><input type="checkbox"/> <sub>2</sub> 其他: _____ |                  |
| 第__天     | <input type="checkbox"/> <sub>0</sub> 否<br><input type="checkbox"/> <sub>1</sub> 是 | <input type="text"/> 年 <input type="text"/> 月 <input type="text"/> 日 | <input type="text"/> | <input type="text"/> | <input type="text"/> | <input type="text"/> | <input type="checkbox"/> <sub>1</sub> 不良事件, 编号: __<br><input type="checkbox"/> <sub>2</sub> 其他: _____ |                  |
| 第__天     | <input type="checkbox"/> <sub>0</sub> 否<br><input type="checkbox"/> <sub>1</sub> 是 | <input type="text"/> 年 <input type="text"/> 月 <input type="text"/> 日 | <input type="text"/> | <input type="text"/> | <input type="text"/> | <input type="text"/> | <input type="checkbox"/> <sub>1</sub> 不良事件, 编号: __<br><input type="checkbox"/> <sub>2</sub> 其他: _____ |                  |

(1) 给药频率: 1=每日三次 2=每日两次 3=每日一次 4=未知 5=其他, 请在横线处具体描述  
(2) 给药情况: 1=不适用 2=剂量调整 3=漏服 4=多服 5=暂停给药 6=其他, 请在横线处具体描述

|                                                  |                 |
|--------------------------------------------------|-----------------|
| 研究方案编号: KY2020-29                                | <b>试验药物使用情况</b> |
| 研究中心编号 <input type="text"/> <input type="text"/> |                 |

受试者是否发生不良事件?  否  是, 请参照表格下方的编码详细填写在下表中。

| 不良事件                                 |        |                                                                         |                                                                            |                                                                         |                      |                                                                    |                                                    |                                                                                           |                      |                          |                       |
|--------------------------------------|--------|-------------------------------------------------------------------------|----------------------------------------------------------------------------|-------------------------------------------------------------------------|----------------------|--------------------------------------------------------------------|----------------------------------------------------|-------------------------------------------------------------------------------------------|----------------------|--------------------------|-----------------------|
| 编号                                   | 不良事件名称 | 开始日期                                                                    | 研究结束时是否持续?                                                                 |                                                                         | CTCAE<br>等级<br>(1)   | 采取的措施                                                              |                                                    | 与研究药<br>物的关系<br>(4)                                                                       | AE<br>转归<br>(5)      | 是否为SAE?                  |                       |
|                                      |        |                                                                         | 是                                                                          | 否→结束日期                                                                  |                      | 对研究药物<br>的措施 (2)                                                   | 其它措施<br>(3)                                        |                                                                                           |                      | 否                        | 是, SAE<br>具体类型<br>(6) |
| 1                                    |        | <input type="text"/> 年<br><input type="text"/> 月 <input type="text"/> 日 | <input type="checkbox"/>                                                   | <input type="text"/> 年<br><input type="text"/> 月 <input type="text"/> 日 | <input type="text"/> | <input type="text"/>                                               | <input type="text"/>                               | <input type="text"/>                                                                      | <input type="text"/> | <input type="checkbox"/> | <input type="text"/>  |
| 2                                    |        | <input type="text"/> 年<br><input type="text"/> 月 <input type="text"/> 日 | <input type="checkbox"/>                                                   | <input type="text"/> 年<br><input type="text"/> 月 <input type="text"/> 日 | <input type="text"/> | <input type="text"/>                                               | <input type="text"/>                               | <input type="text"/>                                                                      | <input type="text"/> | <input type="checkbox"/> | <input type="text"/>  |
| 3                                    |        | <input type="text"/> 年<br><input type="text"/> 月 <input type="text"/> 日 | <input type="checkbox"/>                                                   | <input type="text"/> 年<br><input type="text"/> 月 <input type="text"/> 日 | <input type="text"/> | <input type="text"/>                                               | <input type="text"/>                               | <input type="text"/>                                                                      | <input type="text"/> | <input type="checkbox"/> | <input type="text"/>  |
| 4                                    |        | <input type="text"/> 年<br><input type="text"/> 月 <input type="text"/> 日 | <input type="checkbox"/>                                                   | <input type="text"/> 年<br><input type="text"/> 月 <input type="text"/> 日 | <input type="text"/> | <input type="text"/>                                               | <input type="text"/>                               | <input type="text"/>                                                                      | <input type="text"/> | <input type="checkbox"/> | <input type="text"/>  |
| (1) CTCAE等级                          |        | (2) 对研究药物的措施                                                            | (3) 其它措施                                                                   |                                                                         |                      | (4) 与研究药物关系                                                        | (5) AE转归                                           | (6) SAE具体类型                                                                               |                      |                          |                       |
| 1=1级<br>2=2级<br>3=3级<br>4=4级<br>5=5级 |        | 1=维持目前治疗<br>2=用药暂停<br>3=用药终止<br>4=减小剂量<br>5=不适用<br>6=其它, 请在横线处具体描述      | 1=无<br>2=合并用药, 填写既往/合并药物治疗表<br>3=合并非药物治疗, 填写既往/合并非药物治疗表<br>4=其它, 请在横线处具体描述 |                                                                         |                      | 1=肯定有关<br>2=很可能有关<br>3=可能有关<br>4=可能无关<br>5=肯定无关<br>6=待评价<br>7=无法评价 | 1=未恢复/未治愈<br>2=恢复/治愈<br>3=恢复但留有后遗症<br>4=死亡<br>5=未知 | 1=危及生命<br>2=导致死亡<br>3=需住院治疗或延长目前住院时间<br>4=导致永久或显著的残疾或功能障碍<br>5=导致先天畸形/出生缺陷<br>6=其它重要的医学事件 |                      |                          |                       |



|                                     |          |
|-------------------------------------|----------|
| 研究方案编号: KY2020-29                   | 试验药物使用情况 |
| 研究中心编号  __   __                     |          |
| 受试者筛选号  __   __   __   __   __   __ |          |

| 不良事件                                 |                                                                    |                                                                            |                          |                                   |                                                                    |                                                    |                                                                                         |                     |                 |                          |                       |
|--------------------------------------|--------------------------------------------------------------------|----------------------------------------------------------------------------|--------------------------|-----------------------------------|--------------------------------------------------------------------|----------------------------------------------------|-----------------------------------------------------------------------------------------|---------------------|-----------------|--------------------------|-----------------------|
| 编号                                   | 不良事件名称                                                             | 开始日期                                                                       | 研究结束时是否持续?               |                                   | CTCAE等级<br>(1)                                                     | 采取的措施                                              |                                                                                         | 与研究药<br>物的关系<br>(4) | AE<br>转归<br>(5) | 是否为SAE?                  |                       |
|                                      |                                                                    |                                                                            | 是                        | 否→结束日期                            |                                                                    | 对研究药物<br>的措施(2)                                    | 其它措施<br>(3)                                                                             |                     |                 | 否                        | 是, SAE<br>具体类型<br>(6) |
|                                      |                                                                    | __   __   __ 年<br> __   __   __ 日                                          | <input type="checkbox"/> | __   __   __ 年<br> __   __   __ 日 | __                                                                 | __                                                 | __                                                                                      | __                  | __              | <input type="checkbox"/> | __                    |
|                                      |                                                                    | __   __   __ 年<br> __   __   __ 日                                          | <input type="checkbox"/> | __   __   __ 年<br> __   __   __ 日 | __                                                                 | __                                                 | __                                                                                      | __                  | __              | <input type="checkbox"/> | __                    |
|                                      |                                                                    | __   __   __ 年<br> __   __   __ 日                                          | <input type="checkbox"/> | __   __   __ 年<br> __   __   __ 日 | __                                                                 | __                                                 | __                                                                                      | __                  | __              | <input type="checkbox"/> | __                    |
|                                      |                                                                    | __   __   __ 年<br> __   __   __ 日                                          | <input type="checkbox"/> | __   __   __ 年<br> __   __   __ 日 | __                                                                 | __                                                 | __                                                                                      | __                  | __              | <input type="checkbox"/> | __                    |
|                                      |                                                                    | __   __   __ 年<br> __   __   __ 日                                          | <input type="checkbox"/> | __   __   __ 年<br> __   __   __ 日 | __                                                                 | __                                                 | __                                                                                      | __                  | __              | <input type="checkbox"/> | __                    |
| (1) CTCAE等级                          | (2) 对研究药物的措施                                                       | (3) 其它措施                                                                   |                          |                                   | (4) 与研究药物关系                                                        | (5) AE转归                                           | (6) SAE具体类型                                                                             |                     |                 |                          |                       |
| 1=1级<br>2=2级<br>3=3级<br>4=4级<br>5=5级 | 1=维持目前治疗<br>2=用药暂停<br>3=用药终止<br>4=减小剂量<br>5=不适用<br>6=其它, 请在横线处具体描述 | 1=无<br>2=合并用药, 填写既往/合并药物治疗表<br>3=合并非药物治疗, 填写既往/合并非药物治疗表<br>4=其它, 请在横线处具体描述 |                          |                                   | 1=肯定有关<br>2=很可能有关<br>3=可能有关<br>4=可能无关<br>5=肯定无关<br>6=待评价<br>7=无法评价 | 1=未恢复/未治愈<br>2=恢复/治愈<br>3=恢复但留有后遗症<br>4=死亡<br>5=未知 | 1=危及生命<br>2=导致死亡<br>3=需住院或延长目前住院时间<br>4=导致永久或显著的残疾或功能障碍<br>5=导致先天畸形/出生缺陷<br>6=其它重要的医学事件 |                     |                 |                          |                       |

|                             |                  |
|-----------------------------|------------------|
| 研究方案编号: KY2020-29           | <b>既往/合并药物治疗</b> |
| 研究中心编号 <input type="text"/> |                  |

受试者是否有既往/合并药物治疗?  否  是, 请参照表格下方的编码详细填写在下表中。

**既往/合并药物治疗**

| 编号 | 药物名称<br>(通用名) | 适应症<br>(1)           | 适应症<br>备注 | 单次<br>剂量 | 剂量单位<br>(2)          | 给药频率<br>(3)          | 给药途径<br>(4)          | 开始日期                                                                    | 研究结束时是否持续?               |                                                                         | 是否为指南<br>推荐的标准<br>治疗 (5) |
|----|---------------|----------------------|-----------|----------|----------------------|----------------------|----------------------|-------------------------------------------------------------------------|--------------------------|-------------------------------------------------------------------------|--------------------------|
|    |               |                      |           |          |                      |                      |                      |                                                                         | 是                        | 否→结束日期                                                                  |                          |
| 1  |               | <input type="text"/> |           |          | <input type="text"/> | <input type="text"/> | <input type="text"/> | <input type="text"/> 年<br><input type="text"/> 月 <input type="text"/> 日 | <input type="checkbox"/> | <input type="text"/> 年<br><input type="text"/> 月 <input type="text"/> 日 | <input type="text"/>     |
| 2  |               | <input type="text"/> |           |          | <input type="text"/> | <input type="text"/> | <input type="text"/> | <input type="text"/> 年<br><input type="text"/> 月 <input type="text"/> 日 | <input type="checkbox"/> | <input type="text"/> 年<br><input type="text"/> 月 <input type="text"/> 日 | <input type="text"/>     |
| 3  |               | <input type="text"/> |           |          | <input type="text"/> | <input type="text"/> | <input type="text"/> | <input type="text"/> 年<br><input type="text"/> 月 <input type="text"/> 日 | <input type="checkbox"/> | <input type="text"/> 年<br><input type="text"/> 月 <input type="text"/> 日 | <input type="text"/>     |
| 4  |               | <input type="text"/> |           |          | <input type="text"/> | <input type="text"/> | <input type="text"/> | <input type="text"/> 年<br><input type="text"/> 月 <input type="text"/> 日 | <input type="checkbox"/> | <input type="text"/> 年<br><input type="text"/> 月 <input type="text"/> 日 | <input type="text"/>     |
| 5  |               | <input type="text"/> |           |          | <input type="text"/> | <input type="text"/> | <input type="text"/> | <input type="text"/> 年<br><input type="text"/> 月 <input type="text"/> 日 | <input type="checkbox"/> | <input type="text"/> 年<br><input type="text"/> 月 <input type="text"/> 日 | <input type="text"/>     |

| (1) 适应症                                                                                     | (2) 剂量单位                                                 |                                                                | (3) 给药频率                                                               |                                                                   | (4) 给药途径                                                                        |                                                                     | (5) 指南推<br>荐标准治疗    |
|---------------------------------------------------------------------------------------------|----------------------------------------------------------|----------------------------------------------------------------|------------------------------------------------------------------------|-------------------------------------------------------------------|---------------------------------------------------------------------------------|---------------------------------------------------------------------|---------------------|
| 1=本研究疾病<br>2=既往/伴随疾病 (请在备注处<br>填写既往/伴随疾病编号)<br>3=不良事件 (请在备注处填写<br>不良事件编号)<br>4=其它 (请在备注处描述) | 1=微克(μg)<br>2=毫克(mg)<br>3=克(g)<br>4=毫升(mL)<br>5=国际单位(IU) | 6=单位(U)<br>7=片(Tab)<br>8=胶囊(Cap)<br>9=未知<br>10=其它, 请在<br>横线处填写 | 1=每日一次(qd)<br>2=每日二次(bid)<br>3=每日三次(tid)<br>4=每日四次(qid)<br>5=隔日一次(qod) | 6=每周一次(qw)<br>7=睡前(hs)<br>8=按需(prn)<br>9=未知<br>10=其它, 请在横<br>线处填写 | 1=口服(PO)<br>2=静脉滴注(IVgtt)<br>3=静脉注射(IV)<br>4=肌内注射(IM)<br>5=皮下注射(SQ)<br>6=舌下(SL) | 7=局部 (皮肤) (TOP)<br>8=眼(OPH)<br>9=吸入(INH)<br>10=未知<br>11=其它, 请在横线处填写 | 0=否<br>1=是<br>2=不适用 |

|                             |           |
|-----------------------------|-----------|
| 研究方案编号: KY2020-29           | 既往/合并药物治疗 |
| 研究中心编号 <input type="text"/> |           |

受试者筛选号

| 既往/合并药物治疗                                                                                   |               |                      |                                                                                                                                     |          |                      |                                                                                                                                                       |                      |                                                                                                                                                                      |                          |                                                                         |                          |
|---------------------------------------------------------------------------------------------|---------------|----------------------|-------------------------------------------------------------------------------------------------------------------------------------|----------|----------------------|-------------------------------------------------------------------------------------------------------------------------------------------------------|----------------------|----------------------------------------------------------------------------------------------------------------------------------------------------------------------|--------------------------|-------------------------------------------------------------------------|--------------------------|
| 编号                                                                                          | 药物名称<br>(通用名) | 适应症<br>(1)           | 适应症<br>备注                                                                                                                           | 单次<br>剂量 | 剂量单位<br>(2)          | 给药频率<br>(3)                                                                                                                                           | 给药途径<br>(4)          | 开始日期                                                                                                                                                                 | 研究结束时是否持续?               |                                                                         | 是否为指南<br>推荐的标准<br>治疗 (5) |
|                                                                                             |               |                      |                                                                                                                                     |          |                      |                                                                                                                                                       |                      |                                                                                                                                                                      | 是                        | 否→结束日期                                                                  |                          |
|                                                                                             |               | <input type="text"/> |                                                                                                                                     |          | <input type="text"/> | <input type="text"/>                                                                                                                                  | <input type="text"/> | <input type="text"/> 年<br><input type="text"/> 月 <input type="text"/> 日                                                                                              | <input type="checkbox"/> | <input type="text"/> 年<br><input type="text"/> 月 <input type="text"/> 日 | <input type="text"/>     |
|                                                                                             |               | <input type="text"/> |                                                                                                                                     |          | <input type="text"/> | <input type="text"/>                                                                                                                                  | <input type="text"/> | <input type="text"/> 年<br><input type="text"/> 月 <input type="text"/> 日                                                                                              | <input type="checkbox"/> | <input type="text"/> 年<br><input type="text"/> 月 <input type="text"/> 日 | <input type="text"/>     |
|                                                                                             |               | <input type="text"/> |                                                                                                                                     |          | <input type="text"/> | <input type="text"/>                                                                                                                                  | <input type="text"/> | <input type="text"/> 年<br><input type="text"/> 月 <input type="text"/> 日                                                                                              | <input type="checkbox"/> | <input type="text"/> 年<br><input type="text"/> 月 <input type="text"/> 日 | <input type="text"/>     |
|                                                                                             |               | <input type="text"/> |                                                                                                                                     |          | <input type="text"/> | <input type="text"/>                                                                                                                                  | <input type="text"/> | <input type="text"/> 年<br><input type="text"/> 月 <input type="text"/> 日                                                                                              | <input type="checkbox"/> | <input type="text"/> 年<br><input type="text"/> 月 <input type="text"/> 日 | <input type="text"/>     |
|                                                                                             |               | <input type="text"/> |                                                                                                                                     |          | <input type="text"/> | <input type="text"/>                                                                                                                                  | <input type="text"/> | <input type="text"/> 年<br><input type="text"/> 月 <input type="text"/> 日                                                                                              | <input type="checkbox"/> | <input type="text"/> 年<br><input type="text"/> 月 <input type="text"/> 日 | <input type="text"/>     |
| (1) 适应症                                                                                     |               |                      | (2) 剂量单位                                                                                                                            |          |                      | (3) 给药频率                                                                                                                                              |                      | (4) 给药途径                                                                                                                                                             |                          | (5) 指南推<br>荐标准治疗                                                        |                          |
| 1=本研究疾病<br>2=既往/伴随疾病 (请在备注处<br>填写既往/伴随疾病编号)<br>3=不良事件 (请在备注处填写<br>不良事件编号)<br>4=其它 (请在备注处描述) |               |                      | 1=微克(μg)      6=单位(U)<br>2=毫克(mg)      7=片(Tab)<br>3=克(g)          8=胶囊(Cap)<br>4=毫升(mL)      9=未知<br>5=国际单位(IU) 10=其它, 请在<br>横线处填写 |          |                      | 1=每日一次(qd)      6=每周一次(qw)<br>2=每日二次(bid)      7=睡前(hs)<br>3=每日三次(tid)      8=按需(prn)<br>4=每日四次(qid)      9=未知<br>5=隔日一次(qod)      10=其它, 请在横<br>线处填写 |                      | 1=口服(PO)          7=局部 (皮肤) (TOP)<br>2=静脉滴注(IVgtt)      8=眼(OPH)<br>3=静脉注射(IV)      9=吸入(INH)<br>4=肌内注射(IM)      10=未知<br>5=皮下注射(SQ)      11=其它, 请在横线处填写<br>6=舌下(SL) |                          | 0=否<br>1=是<br>2=不适用                                                     |                          |

|                   |                   |
|-------------------|-------------------|
| 研究方案编号: KY2020-29 | <b>既往/合并非药物治疗</b> |
| 研究中心编号  __   __   |                   |

受试者是否有既往/合并非药物治疗?  否  是, 请填写下表。

**既往/合并非药物治疗**

| 编号 | 治疗名称<br>(请用专业的医学术语描述) | 适应症<br>(1) | 适应症备注 | 开始日期           | 研究结束时是否持续?               |                | 是否为指南推荐的标准治疗<br>(2) |
|----|-----------------------|------------|-------|----------------|--------------------------|----------------|---------------------|
|    |                       |            |       |                | 是                        | 否→结束日期         |                     |
| 1  |                       | __         |       | __ 年 __ 月 __ 日 | <input type="checkbox"/> | __ 年 __ 月 __ 日 | __                  |
| 2  |                       | __         |       | __ 年 __ 月 __ 日 | <input type="checkbox"/> | __ 年 __ 月 __ 日 | __                  |
| 3  |                       | __         |       | __ 年 __ 月 __ 日 | <input type="checkbox"/> | __ 年 __ 月 __ 日 | __                  |
| 4  |                       | __         |       | __ 年 __ 月 __ 日 | <input type="checkbox"/> | __ 年 __ 月 __ 日 | __                  |
| 5  |                       | __         |       | __ 年 __ 月 __ 日 | <input type="checkbox"/> | __ 年 __ 月 __ 日 | __                  |
| 6  |                       | __         |       | __ 年 __ 月 __ 日 | <input type="checkbox"/> | __ 年 __ 月 __ 日 | __                  |
| 7  |                       | __         |       | __ 年 __ 月 __ 日 | <input type="checkbox"/> | __ 年 __ 月 __ 日 | __                  |
| 8  |                       | __         |       | __ 年 __ 月 __ 日 | <input type="checkbox"/> | __ 年 __ 月 __ 日 | __                  |

(1) 适应症: 1=本研究疾病 2=既往/伴随疾病 (请在备注处填写既往/伴随疾病编号) 3=不良事件 (请在备注处填写不良事件编号) 4=其它 (请在备注处描述)  
(2) 是否为指南推荐的标准治疗: 0=否 1=是 2=不适用

|                   |            |
|-------------------|------------|
| 研究方案编号: KY2020-29 | 既往/合并非药物治疗 |
| 研究中心编号  __        |            |

| 既往/合并非药物治疗 |                       |            |       |                           |                          |                           |                     |
|------------|-----------------------|------------|-------|---------------------------|--------------------------|---------------------------|---------------------|
| 编号         | 治疗名称<br>(请用专业的医学术语描述) | 适应症<br>(1) | 适应症备注 | 开始日期                      | 研究结束时是否持续?               |                           | 是否为指南推荐的标准治疗<br>(2) |
|            |                       |            |       |                           | 是                        | 否→结束日期                    |                     |
|            |                       | __         |       | __ _ __ _ 年 __ _ 月 __ _ 日 | <input type="checkbox"/> | __ _ __ _ 年 __ _ 月 __ _ 日 | __                  |
|            |                       | __         |       | __ _ __ _ 年 __ _ 月 __ _ 日 | <input type="checkbox"/> | __ _ __ _ 年 __ _ 月 __ _ 日 | __                  |
|            |                       | __         |       | __ _ __ _ 年 __ _ 月 __ _ 日 | <input type="checkbox"/> | __ _ __ _ 年 __ _ 月 __ _ 日 | __                  |
|            |                       | __         |       | __ _ __ _ 年 __ _ 月 __ _ 日 | <input type="checkbox"/> | __ _ __ _ 年 __ _ 月 __ _ 日 | __                  |
|            |                       | __         |       | __ _ __ _ 年 __ _ 月 __ _ 日 | <input type="checkbox"/> | __ _ __ _ 年 __ _ 月 __ _ 日 | __                  |
|            |                       | __         |       | __ _ __ _ 年 __ _ 月 __ _ 日 | <input type="checkbox"/> | __ _ __ _ 年 __ _ 月 __ _ 日 | __                  |
|            |                       | __         |       | __ _ __ _ 年 __ _ 月 __ _ 日 | <input type="checkbox"/> | __ _ __ _ 年 __ _ 月 __ _ 日 | __                  |
|            |                       | __         |       | __ _ __ _ 年 __ _ 月 __ _ 日 | <input type="checkbox"/> | __ _ __ _ 年 __ _ 月 __ _ 日 | __                  |
|            |                       | __         |       | __ _ __ _ 年 __ _ 月 __ _ 日 | <input type="checkbox"/> | __ _ __ _ 年 __ _ 月 __ _ 日 | __                  |

(1) 适应症: 1=本研究疾病 2=既往/伴随疾病 (请在备注处填写既往/伴随疾病编号) 3=不良事件 (请在备注处填写不良事件编号) 4=其它 (请在备注处描述)  
(2) 是否为指南推荐的标准治疗: 0=否 1=是 2=不适用

|                   |                             |
|-------------------|-----------------------------|
| 研究方案编号: KY2020-29 | <b>IMV/NIV、ECMO、HFNC、氧疗</b> |
| 研究中心编号  __   __   |                             |

受试者是否有IMV/NIV、ECMO、HFNC、氧疗?       否       是, 请填写下表。

**IMV/NIV、ECMO、HFNC、氧疗**

| 编号 | 治疗名称                                                                                                                                                                                                                     | 治疗开始日期                | 治疗开始时间    | 治疗结束日期                | 治疗结束时间    |
|----|--------------------------------------------------------------------------------------------------------------------------------------------------------------------------------------------------------------------------|-----------------------|-----------|-----------------------|-----------|
| 1  | <input type="checkbox"/> <sub>1</sub> IMV <input type="checkbox"/> <sub>3</sub> ECMO<br><input type="checkbox"/> <sub>2</sub> NIV <input type="checkbox"/> <sub>4</sub> HFNC<br><input type="checkbox"/> <sub>5</sub> 氧疗 | _ _ _ _ 年 _ _ 月 _ _ 日 | _ _ : _ _ | _ _ _ _ 年 _ _ 月 _ _ 日 | _ _ : _ _ |
| 2  | <input type="checkbox"/> <sub>1</sub> IMV <input type="checkbox"/> <sub>3</sub> ECMO<br><input type="checkbox"/> <sub>2</sub> NIV <input type="checkbox"/> <sub>4</sub> HFNC<br><input type="checkbox"/> <sub>5</sub> 氧疗 | _ _ _ _ 年 _ _ 月 _ _ 日 | _ _ : _ _ | _ _ _ _ 年 _ _ 月 _ _ 日 | _ _ : _ _ |
| 3  | <input type="checkbox"/> <sub>1</sub> IMV <input type="checkbox"/> <sub>3</sub> ECMO<br><input type="checkbox"/> <sub>2</sub> NIV <input type="checkbox"/> <sub>4</sub> HFNC<br><input type="checkbox"/> <sub>5</sub> 氧疗 | _ _ _ _ 年 _ _ 月 _ _ 日 | _ _ : _ _ | _ _ _ _ 年 _ _ 月 _ _ 日 | _ _ : _ _ |
| 4  | <input type="checkbox"/> <sub>1</sub> IMV <input type="checkbox"/> <sub>3</sub> ECMO<br><input type="checkbox"/> <sub>2</sub> NIV <input type="checkbox"/> <sub>4</sub> HFNC<br><input type="checkbox"/> <sub>5</sub> 氧疗 | _ _ _ _ 年 _ _ 月 _ _ 日 | _ _ : _ _ | _ _ _ _ 年 _ _ 月 _ _ 日 | _ _ : _ _ |
| 5  | <input type="checkbox"/> <sub>1</sub> IMV <input type="checkbox"/> <sub>3</sub> ECMO<br><input type="checkbox"/> <sub>2</sub> NIV <input type="checkbox"/> <sub>4</sub> HFNC<br><input type="checkbox"/> <sub>5</sub> 氧疗 | _ _ _ _ 年 _ _ 月 _ _ 日 | _ _ : _ _ | _ _ _ _ 年 _ _ 月 _ _ 日 | _ _ : _ _ |
| 6  | <input type="checkbox"/> <sub>1</sub> IMV <input type="checkbox"/> <sub>3</sub> ECMO<br><input type="checkbox"/> <sub>2</sub> NIV <input type="checkbox"/> <sub>4</sub> HFNC<br><input type="checkbox"/> <sub>5</sub> 氧疗 | _ _ _ _ 年 _ _ 月 _ _ 日 | _ _ : _ _ | _ _ _ _ 年 _ _ 月 _ _ 日 | _ _ : _ _ |
| 7  | <input type="checkbox"/> <sub>1</sub> IMV <input type="checkbox"/> <sub>3</sub> ECMO<br><input type="checkbox"/> <sub>2</sub> NIV <input type="checkbox"/> <sub>4</sub> HFNC<br><input type="checkbox"/> <sub>5</sub> 氧疗 | _ _ _ _ 年 _ _ 月 _ _ 日 | _ _ : _ _ | _ _ _ _ 年 _ _ 月 _ _ 日 | _ _ : _ _ |

|                             |                             |
|-----------------------------|-----------------------------|
| 研究方案编号: KY2020-29           | <b>IMV/NIV、ECMO、HFNC、氧疗</b> |
| 研究中心编号 <input type="text"/> |                             |

受试者筛选号

**IMV/NIV、ECMO、HFNC、氧疗**

| 编号 | 治疗名称                                                                                                                                                                                                                     | 治疗开始日期                                                               | 治疗开始时间                                      | 治疗结束日期                                                               | 治疗结束时间                                      |
|----|--------------------------------------------------------------------------------------------------------------------------------------------------------------------------------------------------------------------------|----------------------------------------------------------------------|---------------------------------------------|----------------------------------------------------------------------|---------------------------------------------|
|    | <input type="checkbox"/> <sub>1</sub> IMV <input type="checkbox"/> <sub>3</sub> ECMO<br><input type="checkbox"/> <sub>2</sub> NIV <input type="checkbox"/> <sub>4</sub> HFNC<br><input type="checkbox"/> <sub>5</sub> 氧疗 | <input type="text"/> 年 <input type="text"/> 月 <input type="text"/> 日 | <input type="text"/> : <input type="text"/> | <input type="text"/> 年 <input type="text"/> 月 <input type="text"/> 日 | <input type="text"/> : <input type="text"/> |
|    | <input type="checkbox"/> <sub>1</sub> IMV <input type="checkbox"/> <sub>3</sub> ECMO<br><input type="checkbox"/> <sub>2</sub> NIV <input type="checkbox"/> <sub>4</sub> HFNC<br><input type="checkbox"/> <sub>5</sub> 氧疗 | <input type="text"/> 年 <input type="text"/> 月 <input type="text"/> 日 | <input type="text"/> : <input type="text"/> | <input type="text"/> 年 <input type="text"/> 月 <input type="text"/> 日 | <input type="text"/> : <input type="text"/> |
|    | <input type="checkbox"/> <sub>1</sub> IMV <input type="checkbox"/> <sub>3</sub> ECMO<br><input type="checkbox"/> <sub>2</sub> NIV <input type="checkbox"/> <sub>4</sub> HFNC<br><input type="checkbox"/> <sub>5</sub> 氧疗 | <input type="text"/> 年 <input type="text"/> 月 <input type="text"/> 日 | <input type="text"/> : <input type="text"/> | <input type="text"/> 年 <input type="text"/> 月 <input type="text"/> 日 | <input type="text"/> : <input type="text"/> |
|    | <input type="checkbox"/> <sub>1</sub> IMV <input type="checkbox"/> <sub>3</sub> ECMO<br><input type="checkbox"/> <sub>2</sub> NIV <input type="checkbox"/> <sub>4</sub> HFNC<br><input type="checkbox"/> <sub>5</sub> 氧疗 | <input type="text"/> 年 <input type="text"/> 月 <input type="text"/> 日 | <input type="text"/> : <input type="text"/> | <input type="text"/> 年 <input type="text"/> 月 <input type="text"/> 日 | <input type="text"/> : <input type="text"/> |
|    | <input type="checkbox"/> <sub>1</sub> IMV <input type="checkbox"/> <sub>3</sub> ECMO<br><input type="checkbox"/> <sub>2</sub> NIV <input type="checkbox"/> <sub>4</sub> HFNC<br><input type="checkbox"/> <sub>5</sub> 氧疗 | <input type="text"/> 年 <input type="text"/> 月 <input type="text"/> 日 | <input type="text"/> : <input type="text"/> | <input type="text"/> 年 <input type="text"/> 月 <input type="text"/> 日 | <input type="text"/> : <input type="text"/> |
|    | <input type="checkbox"/> <sub>1</sub> IMV <input type="checkbox"/> <sub>3</sub> ECMO<br><input type="checkbox"/> <sub>2</sub> NIV <input type="checkbox"/> <sub>4</sub> HFNC<br><input type="checkbox"/> <sub>5</sub> 氧疗 | <input type="text"/> 年 <input type="text"/> 月 <input type="text"/> 日 | <input type="text"/> : <input type="text"/> | <input type="text"/> 年 <input type="text"/> 月 <input type="text"/> 日 | <input type="text"/> : <input type="text"/> |
|    | <input type="checkbox"/> <sub>1</sub> IMV <input type="checkbox"/> <sub>3</sub> ECMO<br><input type="checkbox"/> <sub>2</sub> NIV <input type="checkbox"/> <sub>4</sub> HFNC<br><input type="checkbox"/> <sub>5</sub> 氧疗 | <input type="text"/> 年 <input type="text"/> 月 <input type="text"/> 日 | <input type="text"/> : <input type="text"/> | <input type="text"/> 年 <input type="text"/> 月 <input type="text"/> 日 | <input type="text"/> : <input type="text"/> |
|    | <input type="checkbox"/> <sub>1</sub> IMV <input type="checkbox"/> <sub>3</sub> ECMO<br><input type="checkbox"/> <sub>2</sub> NIV <input type="checkbox"/> <sub>4</sub> HFNC<br><input type="checkbox"/> <sub>5</sub> 氧疗 | <input type="text"/> 年 <input type="text"/> 月 <input type="text"/> 日 | <input type="text"/> : <input type="text"/> | <input type="text"/> 年 <input type="text"/> 月 <input type="text"/> 日 | <input type="text"/> : <input type="text"/> |







|                                                      |             |
|------------------------------------------------------|-------------|
| 研究方案编号: KY2020-29                                    | <b>研究总结</b> |
| 研究中心编号  __   __  受试者筛选号  __   __   __   __   __   __ |             |

| 研究总结                                                                                                                                                                                                                                                                                                                                                                                                                                                                                                                                                          |
|---------------------------------------------------------------------------------------------------------------------------------------------------------------------------------------------------------------------------------------------------------------------------------------------------------------------------------------------------------------------------------------------------------------------------------------------------------------------------------------------------------------------------------------------------------------|
| <p>受试者是否按研究方案完成了研究？</p> <p><input type="checkbox"/><sub>1</sub> 是，完成日期： __   __   __   __  年  __   __  月  __   __  日</p> <p><input type="checkbox"/><sub>0</sub> 否，终止日期： __   __   __   __  年  __   __  月  __   __  日</p>                                                                                                                                                                                                                                                                                                                                     |
| <p>如提前退出研究，请选择最重要的原因（单选）：</p> <p><input type="checkbox"/><sub>1</sub> 研究期间出现疾病恶化，经研究者综合评估后需要改变治疗</p> <p><input type="checkbox"/><sub>2</sub> 药物不良事件导致病情加重的出现</p> <p><input type="checkbox"/><sub>3</sub> 患者不愿意继续使用研究药物</p> <p><input type="checkbox"/><sub>4</sub> 妊娠</p> <p><input type="checkbox"/><sub>5</sub> 受试者失访</p> <p><input type="checkbox"/><sub>6</sub> 受试者死亡</p> <p><input type="checkbox"/><sub>7</sub> 受试者撤回知情同意</p> <p><input type="checkbox"/><sub>8</sub> 研究整体中止</p> <p><input type="checkbox"/><sub>9</sub> 其他，请描述： _____</p> <p>_____</p> |
| <p>备注（请记录其他需要补充说明的事由）：</p> <p>_____</p> <p>_____</p> <p>_____</p>                                                                                                                                                                                                                                                                                                                                                                                                                                                                                             |

|                                                       |      |
|-------------------------------------------------------|------|
| 研究方案编号: KY2020-29                                     | 住院情况 |
| 研究中心编号 [ ] [ ] 受试者筛选号 [ ] [ ] [ ] [ ] [ ] [ ] [ ] [ ] |      |

| 住院情况                                                                                              |
|---------------------------------------------------------------------------------------------------|
| 受试者是否因新型冠状病毒肺炎住院? <input type="checkbox"/> <sub>0</sub> 否 <input type="checkbox"/> <sub>1</sub> 是 |
| 如是, 入院日期: [ ] [ ] [ ] [ ] 年 [ ] [ ] 月 [ ] [ ] 日                                                   |
| 研究结束时是否出院: <input type="checkbox"/> <sub>0</sub> 否 <input type="checkbox"/> <sub>1</sub> 是        |
| 如是, 出院日期: [ ] [ ] [ ] [ ] 年 [ ] [ ] 月 [ ] [ ] 日                                                   |

|                             |                             |           |
|-----------------------------|-----------------------------|-----------|
| 研究方案编号: KY2020-29           |                             | <b>死亡</b> |
| 研究中心编号 <input type="text"/> | 受试者筛选号 <input type="text"/> |           |

  

| 死亡                                                                                                                                                                     |
|------------------------------------------------------------------------------------------------------------------------------------------------------------------------|
| 受试者是否死亡? <input type="checkbox"/> <sub>0</sub> 否 <input type="checkbox"/> <sub>1</sub> 是, 请填写。 <input type="checkbox"/> <sub>2</sub> 未知                                |
| 死亡日期: <input type="text"/> 年 <input type="text"/> 月 <input type="text"/> 日                                                                                             |
| 死亡原因: <input type="checkbox"/> <sub>1</sub> 不良事件<br><input type="checkbox"/> <sub>2</sub> 未知<br><input type="checkbox"/> <sub>3</sub> 其他, 请描述: _____<br>_____<br>_____ |

|                             |                 |
|-----------------------------|-----------------|
| 研究方案编号: KY2020-29           | <b>CRF 审核声明</b> |
| 研究中心编号 <input type="text"/> |                 |

| 研究者声明                                                                                                                                                            |
|------------------------------------------------------------------------------------------------------------------------------------------------------------------|
| <p>我已审核并确认此病例报告中记录的所有数据均真实、准确、可靠、完整无误，并与原始资料一致，所有错误或遗漏均已得到更正或注明。</p> <p>主要研究者签字: _____ 签字日期: <input type="text"/>年<input type="text"/>月<input type="text"/>日</p> |

| CRA 声明                                                                                                                                         |
|------------------------------------------------------------------------------------------------------------------------------------------------|
| <p>我已核对并确认此病例报告中记录的所有数据均真实、准确、可靠、完整无误，并与原始资料一致。</p> <p>CRA 签字: _____ 签字日期: <input type="text"/>年<input type="text"/>月<input type="text"/>日</p> |

|                                |          |
|--------------------------------|----------|
| 研究方案编号: KY2020-29              | 附表-计划外检查 |
| 研究中心编号  _ _  受试者筛选号  _ _ _ _ _ |          |

|                                                   |                               |      |                                                                                                                                                                                                                                                                     |
|---------------------------------------------------|-------------------------------|------|---------------------------------------------------------------------------------------------------------------------------------------------------------------------------------------------------------------------------------------------------------------------|
| <b>生命体征</b> <input type="checkbox"/> 未查, 原因 _____ |                               |      |                                                                                                                                                                                                                                                                     |
| 检查日期                                              | _ _ _ _ 年 _ _ 月 _ _ 日         |      |                                                                                                                                                                                                                                                                     |
| 日最高体温                                             | _ _ . _ °C                    | 测量方式 | <input type="checkbox"/> <sub>1</sub> 腋下 <input type="checkbox"/> <sub>2</sub> 口腔 <input type="checkbox"/> <sub>3</sub> 肛门<br><input type="checkbox"/> <sub>4</sub> 耳朵 <input type="checkbox"/> <sub>5</sub> 未知 <input type="checkbox"/> <sub>6</sub> 其他, 请描述 _____ |
| 呼吸频率                                              | _ _ 次/分                       | 脉搏   | _ _ _ 次/分                                                                                                                                                                                                                                                           |
| 血压                                                | _ _ _ / _ _ _  mmHg (收缩压/舒张压) |      |                                                                                                                                                                                                                                                                     |

|                                                   |                               |      |                                                                                                                                                                                                                                                                     |
|---------------------------------------------------|-------------------------------|------|---------------------------------------------------------------------------------------------------------------------------------------------------------------------------------------------------------------------------------------------------------------------|
| <b>生命体征</b> <input type="checkbox"/> 未查, 原因 _____ |                               |      |                                                                                                                                                                                                                                                                     |
| 检查日期                                              | _ _ _ _ 年 _ _ 月 _ _ 日         |      |                                                                                                                                                                                                                                                                     |
| 日最高体温                                             | _ _ . _ °C                    | 测量方式 | <input type="checkbox"/> <sub>1</sub> 腋下 <input type="checkbox"/> <sub>2</sub> 口腔 <input type="checkbox"/> <sub>3</sub> 肛门<br><input type="checkbox"/> <sub>4</sub> 耳朵 <input type="checkbox"/> <sub>5</sub> 未知 <input type="checkbox"/> <sub>6</sub> 其他, 请描述 _____ |
| 呼吸频率                                              | _ _ 次/分                       | 脉搏   | _ _ _ 次/分                                                                                                                                                                                                                                                           |
| 血压                                                | _ _ _ / _ _ _  mmHg (收缩压/舒张压) |      |                                                                                                                                                                                                                                                                     |

|                                                   |                               |      |                                                                                                                                                                                                                                                                     |
|---------------------------------------------------|-------------------------------|------|---------------------------------------------------------------------------------------------------------------------------------------------------------------------------------------------------------------------------------------------------------------------|
| <b>生命体征</b> <input type="checkbox"/> 未查, 原因 _____ |                               |      |                                                                                                                                                                                                                                                                     |
| 检查日期                                              | _ _ _ _ 年 _ _ 月 _ _ 日         |      |                                                                                                                                                                                                                                                                     |
| 日最高体温                                             | _ _ . _ °C                    | 测量方式 | <input type="checkbox"/> <sub>1</sub> 腋下 <input type="checkbox"/> <sub>2</sub> 口腔 <input type="checkbox"/> <sub>3</sub> 肛门<br><input type="checkbox"/> <sub>4</sub> 耳朵 <input type="checkbox"/> <sub>5</sub> 未知 <input type="checkbox"/> <sub>6</sub> 其他, 请描述 _____ |
| 呼吸频率                                              | _ _ 次/分                       | 脉搏   | _ _ _ 次/分                                                                                                                                                                                                                                                           |
| 血压                                                | _ _ _ / _ _ _  mmHg (收缩压/舒张压) |      |                                                                                                                                                                                                                                                                     |

|                                                   |                               |      |                                                                                                                                                                                                                                                                     |
|---------------------------------------------------|-------------------------------|------|---------------------------------------------------------------------------------------------------------------------------------------------------------------------------------------------------------------------------------------------------------------------|
| <b>生命体征</b> <input type="checkbox"/> 未查, 原因 _____ |                               |      |                                                                                                                                                                                                                                                                     |
| 检查日期                                              | _ _ _ _ 年 _ _ 月 _ _ 日         |      |                                                                                                                                                                                                                                                                     |
| 日最高体温                                             | _ _ . _ °C                    | 测量方式 | <input type="checkbox"/> <sub>1</sub> 腋下 <input type="checkbox"/> <sub>2</sub> 口腔 <input type="checkbox"/> <sub>3</sub> 肛门<br><input type="checkbox"/> <sub>4</sub> 耳朵 <input type="checkbox"/> <sub>5</sub> 未知 <input type="checkbox"/> <sub>6</sub> 其他, 请描述 _____ |
| 呼吸频率                                              | _ _ 次/分                       | 脉搏   | _ _ _ 次/分                                                                                                                                                                                                                                                           |
| 血压                                                | _ _ _ / _ _ _  mmHg (收缩压/舒张压) |      |                                                                                                                                                                                                                                                                     |

|                   |          |
|-------------------|----------|
| 研究方案编号: KY2020-29 | 附表-计划外检查 |
| 研究中心编号  __   __   |          |

体格检查  未查, 原因 \_\_\_\_\_

检查日期: |\_\_| |\_\_| |年|\_\_| |\_\_| |月|\_\_| |\_\_| |日

| 检查部位   | 检查结果                                  |                                       |                                       |                                       | 异常请描述 |
|--------|---------------------------------------|---------------------------------------|---------------------------------------|---------------------------------------|-------|
|        | 1=正常                                  | 2=异常无临床意义                             | 3=异常有临床意义                             | 0=未查                                  |       |
| 整体外观   | <input type="checkbox"/> <sub>1</sub> | <input type="checkbox"/> <sub>2</sub> | <input type="checkbox"/> <sub>3</sub> | <input type="checkbox"/> <sub>0</sub> |       |
| 头      | <input type="checkbox"/> <sub>1</sub> | <input type="checkbox"/> <sub>2</sub> | <input type="checkbox"/> <sub>3</sub> | <input type="checkbox"/> <sub>0</sub> |       |
| 眼      | <input type="checkbox"/> <sub>1</sub> | <input type="checkbox"/> <sub>2</sub> | <input type="checkbox"/> <sub>3</sub> | <input type="checkbox"/> <sub>0</sub> |       |
| 耳      | <input type="checkbox"/> <sub>1</sub> | <input type="checkbox"/> <sub>2</sub> | <input type="checkbox"/> <sub>3</sub> | <input type="checkbox"/> <sub>0</sub> |       |
| 鼻      | <input type="checkbox"/> <sub>1</sub> | <input type="checkbox"/> <sub>2</sub> | <input type="checkbox"/> <sub>3</sub> | <input type="checkbox"/> <sub>0</sub> |       |
| 喉      | <input type="checkbox"/> <sub>1</sub> | <input type="checkbox"/> <sub>2</sub> | <input type="checkbox"/> <sub>3</sub> | <input type="checkbox"/> <sub>0</sub> |       |
| 颈部及甲状腺 | <input type="checkbox"/> <sub>1</sub> | <input type="checkbox"/> <sub>2</sub> | <input type="checkbox"/> <sub>3</sub> | <input type="checkbox"/> <sub>0</sub> |       |
| 皮肤     | <input type="checkbox"/> <sub>1</sub> | <input type="checkbox"/> <sub>2</sub> | <input type="checkbox"/> <sub>3</sub> | <input type="checkbox"/> <sub>0</sub> |       |
| 心血管系统  | <input type="checkbox"/> <sub>1</sub> | <input type="checkbox"/> <sub>2</sub> | <input type="checkbox"/> <sub>3</sub> | <input type="checkbox"/> <sub>0</sub> |       |
| 胸部及肺   | <input type="checkbox"/> <sub>1</sub> | <input type="checkbox"/> <sub>2</sub> | <input type="checkbox"/> <sub>3</sub> | <input type="checkbox"/> <sub>0</sub> |       |
| 腹部     | <input type="checkbox"/> <sub>1</sub> | <input type="checkbox"/> <sub>2</sub> | <input type="checkbox"/> <sub>3</sub> | <input type="checkbox"/> <sub>0</sub> |       |
| 神经系统   | <input type="checkbox"/> <sub>1</sub> | <input type="checkbox"/> <sub>2</sub> | <input type="checkbox"/> <sub>3</sub> | <input type="checkbox"/> <sub>0</sub> |       |
| 骨骼肌系统  | <input type="checkbox"/> <sub>1</sub> | <input type="checkbox"/> <sub>2</sub> | <input type="checkbox"/> <sub>3</sub> | <input type="checkbox"/> <sub>0</sub> |       |
| 淋巴系统   | <input type="checkbox"/> <sub>1</sub> | <input type="checkbox"/> <sub>2</sub> | <input type="checkbox"/> <sub>3</sub> | <input type="checkbox"/> <sub>0</sub> |       |

|                                                                                                                                                                                |                 |
|--------------------------------------------------------------------------------------------------------------------------------------------------------------------------------|-----------------|
| 研究方案编号: KY2020-29                                                                                                                                                              | <b>附表-计划外检查</b> |
| 研究中心编号 <input type="text"/> <input type="text"/> <input type="text"/> <input type="text"/> <input type="text"/> <input type="text"/>                                           |                 |
| 受试者筛选号 <input type="text"/> |                 |

|                                                                                                                                                                                                                                                                                                                   |
|-------------------------------------------------------------------------------------------------------------------------------------------------------------------------------------------------------------------------------------------------------------------------------------------------------------------|
| <b>有无呼吸道症状</b> <input type="checkbox"/> <sub>0</sub> 未查, 原因 _____                                                                                                                                                                                                                                                 |
| 检查日期: <input type="text"/> <input type="text"/> <input type="text"/> <input type="text"/> <input type="text"/> <input type="text"/> 年 <input type="text"/> <input type="text"/> <input type="text"/> <input type="text"/> 月 <input type="text"/> <input type="text"/> <input type="text"/> <input type="text"/> 日 |
| 受试者有无呼吸道症状: <input type="checkbox"/> <sub>0</sub> 无 <input type="checkbox"/> <sub>1</sub> 有, 请描述: _____                                                                                                                                                                                                           |
| _____                                                                                                                                                                                                                                                                                                             |

|                                                                                                                                                                                                                                                                                                                   |
|-------------------------------------------------------------------------------------------------------------------------------------------------------------------------------------------------------------------------------------------------------------------------------------------------------------------|
| <b>有无呼吸道症状</b> <input type="checkbox"/> <sub>0</sub> 未查, 原因 _____                                                                                                                                                                                                                                                 |
| 检查日期: <input type="text"/> <input type="text"/> <input type="text"/> <input type="text"/> <input type="text"/> <input type="text"/> 年 <input type="text"/> <input type="text"/> <input type="text"/> <input type="text"/> 月 <input type="text"/> <input type="text"/> <input type="text"/> <input type="text"/> 日 |
| 受试者有无呼吸道症状: <input type="checkbox"/> <sub>0</sub> 无 <input type="checkbox"/> <sub>1</sub> 有, 请描述: _____                                                                                                                                                                                                           |
| _____                                                                                                                                                                                                                                                                                                             |

|                                                                                                                                                                                                                                                                                                                   |
|-------------------------------------------------------------------------------------------------------------------------------------------------------------------------------------------------------------------------------------------------------------------------------------------------------------------|
| <b>有无呼吸道症状</b> <input type="checkbox"/> <sub>0</sub> 未查, 原因 _____                                                                                                                                                                                                                                                 |
| 检查日期: <input type="text"/> <input type="text"/> <input type="text"/> <input type="text"/> <input type="text"/> <input type="text"/> 年 <input type="text"/> <input type="text"/> <input type="text"/> <input type="text"/> 月 <input type="text"/> <input type="text"/> <input type="text"/> <input type="text"/> 日 |
| 受试者有无呼吸道症状: <input type="checkbox"/> <sub>0</sub> 无 <input type="checkbox"/> <sub>1</sub> 有, 请描述: _____                                                                                                                                                                                                           |
| _____                                                                                                                                                                                                                                                                                                             |

|                                                                                                                                                                                                                                                                                                                   |
|-------------------------------------------------------------------------------------------------------------------------------------------------------------------------------------------------------------------------------------------------------------------------------------------------------------------|
| <b>有无呼吸道症状</b> <input type="checkbox"/> <sub>0</sub> 未查, 原因 _____                                                                                                                                                                                                                                                 |
| 检查日期: <input type="text"/> <input type="text"/> <input type="text"/> <input type="text"/> <input type="text"/> <input type="text"/> 年 <input type="text"/> <input type="text"/> <input type="text"/> <input type="text"/> 月 <input type="text"/> <input type="text"/> <input type="text"/> <input type="text"/> 日 |
| 受试者有无呼吸道症状: <input type="checkbox"/> <sub>0</sub> 无 <input type="checkbox"/> <sub>1</sub> 有, 请描述: _____                                                                                                                                                                                                           |
| _____                                                                                                                                                                                                                                                                                                             |

|                                                                                                                                                                                                                                                                                                                   |
|-------------------------------------------------------------------------------------------------------------------------------------------------------------------------------------------------------------------------------------------------------------------------------------------------------------------|
| <b>有无呼吸道症状</b> <input type="checkbox"/> <sub>0</sub> 未查, 原因 _____                                                                                                                                                                                                                                                 |
| 检查日期: <input type="text"/> <input type="text"/> <input type="text"/> <input type="text"/> <input type="text"/> <input type="text"/> 年 <input type="text"/> <input type="text"/> <input type="text"/> <input type="text"/> 月 <input type="text"/> <input type="text"/> <input type="text"/> <input type="text"/> 日 |
| 受试者有无呼吸道症状: <input type="checkbox"/> <sub>0</sub> 无 <input type="checkbox"/> <sub>1</sub> 有, 请描述: _____                                                                                                                                                                                                           |
| _____                                                                                                                                                                                                                                                                                                             |

|                                                                                                                                                                                                                                                                                                                   |
|-------------------------------------------------------------------------------------------------------------------------------------------------------------------------------------------------------------------------------------------------------------------------------------------------------------------|
| <b>有无呼吸道症状</b> <input type="checkbox"/> <sub>0</sub> 未查, 原因 _____                                                                                                                                                                                                                                                 |
| 检查日期: <input type="text"/> <input type="text"/> <input type="text"/> <input type="text"/> <input type="text"/> <input type="text"/> 年 <input type="text"/> <input type="text"/> <input type="text"/> <input type="text"/> 月 <input type="text"/> <input type="text"/> <input type="text"/> <input type="text"/> 日 |
| 受试者有无呼吸道症状: <input type="checkbox"/> <sub>0</sub> 无 <input type="checkbox"/> <sub>1</sub> 有, 请描述: _____                                                                                                                                                                                                           |
| _____                                                                                                                                                                                                                                                                                                             |

|                                                                                                                                                                                                                                                                                                                   |
|-------------------------------------------------------------------------------------------------------------------------------------------------------------------------------------------------------------------------------------------------------------------------------------------------------------------|
| <b>有无呼吸道症状</b> <input type="checkbox"/> <sub>0</sub> 未查, 原因 _____                                                                                                                                                                                                                                                 |
| 检查日期: <input type="text"/> <input type="text"/> <input type="text"/> <input type="text"/> <input type="text"/> <input type="text"/> 年 <input type="text"/> <input type="text"/> <input type="text"/> <input type="text"/> 月 <input type="text"/> <input type="text"/> <input type="text"/> <input type="text"/> 日 |
| 受试者有无呼吸道症状: <input type="checkbox"/> <sub>0</sub> 无 <input type="checkbox"/> <sub>1</sub> 有, 请描述: _____                                                                                                                                                                                                           |
| _____                                                                                                                                                                                                                                                                                                             |



|                                                                                            |                 |
|--------------------------------------------------------------------------------------------|-----------------|
| 研究方案编号: KY2020-29                                                                          | <b>附表-计划外检查</b> |
| 研究中心编号 <input style="width: 40px;" type="text"/> <input style="width: 40px;" type="text"/> |                 |

| <b>血常规</b> <input type="checkbox"/> <sub>0</sub> 未查, 原因 _____                                                                                                                                                                                                                                                     |      |                                                                                                           |                                       |                                                                                                                                        |                                       |                                       |
|-------------------------------------------------------------------------------------------------------------------------------------------------------------------------------------------------------------------------------------------------------------------------------------------------------------------|------|-----------------------------------------------------------------------------------------------------------|---------------------------------------|----------------------------------------------------------------------------------------------------------------------------------------|---------------------------------------|---------------------------------------|
| 采样日期: <input style="width: 40px;" type="text"/> <input style="width: 40px;" type="text"/> <input style="width: 40px;" type="text"/> 年 <input style="width: 40px;" type="text"/> <input style="width: 40px;" type="text"/> 月 <input style="width: 40px;" type="text"/> <input style="width: 40px;" type="text"/> 日 |      |                                                                                                           |                                       | 正常值范围编号: <input style="width: 40px;" type="text"/> <input style="width: 40px;" type="text"/> <input style="width: 40px;" type="text"/> |                                       |                                       |
| 检查项目                                                                                                                                                                                                                                                                                                              | 测量结果 |                                                                                                           | 结果判定                                  |                                                                                                                                        |                                       | 未查                                    |
|                                                                                                                                                                                                                                                                                                                   | 实测值  | 单位                                                                                                        | 正常                                    | 异常                                                                                                                                     |                                       |                                       |
|                                                                                                                                                                                                                                                                                                                   |      |                                                                                                           |                                       | 无临床意义                                                                                                                                  | 有临床意义                                 |                                       |
| 红细胞计数 (RBC)                                                                                                                                                                                                                                                                                                       |      | <input type="checkbox"/> <sub>1</sub> 10 <sup>12</sup> /L <input type="checkbox"/> <sub>2</sub> 其他: _____ | <input type="checkbox"/> <sub>1</sub> | <input type="checkbox"/> <sub>2</sub>                                                                                                  | <input type="checkbox"/> <sub>3</sub> | <input type="checkbox"/> <sub>0</sub> |
| 白细胞计数 (WBC)                                                                                                                                                                                                                                                                                                       |      | <input type="checkbox"/> <sub>1</sub> 10 <sup>9</sup> /L <input type="checkbox"/> <sub>2</sub> 其他: _____  | <input type="checkbox"/> <sub>1</sub> | <input type="checkbox"/> <sub>2</sub>                                                                                                  | <input type="checkbox"/> <sub>3</sub> | <input type="checkbox"/> <sub>0</sub> |
| 血红蛋白 (Hb)                                                                                                                                                                                                                                                                                                         |      | <input type="checkbox"/> <sub>1</sub> g/L <input type="checkbox"/> <sub>2</sub> 其他: _____                 | <input type="checkbox"/> <sub>1</sub> | <input type="checkbox"/> <sub>2</sub>                                                                                                  | <input type="checkbox"/> <sub>3</sub> | <input type="checkbox"/> <sub>0</sub> |
| 血小板计数 (PLT)                                                                                                                                                                                                                                                                                                       |      | <input type="checkbox"/> <sub>1</sub> 10 <sup>9</sup> /L <input type="checkbox"/> <sub>2</sub> 其他: _____  | <input type="checkbox"/> <sub>1</sub> | <input type="checkbox"/> <sub>2</sub>                                                                                                  | <input type="checkbox"/> <sub>3</sub> | <input type="checkbox"/> <sub>0</sub> |
| 中性粒细胞计数 (ANC)                                                                                                                                                                                                                                                                                                     |      | <input type="checkbox"/> <sub>1</sub> 10 <sup>9</sup> /L <input type="checkbox"/> <sub>2</sub> 其他: _____  | <input type="checkbox"/> <sub>1</sub> | <input type="checkbox"/> <sub>2</sub>                                                                                                  | <input type="checkbox"/> <sub>3</sub> | <input type="checkbox"/> <sub>0</sub> |
| 淋巴细胞计数 (LY)                                                                                                                                                                                                                                                                                                       |      | <input type="checkbox"/> <sub>1</sub> 10 <sup>9</sup> /L <input type="checkbox"/> <sub>2</sub> 其他: _____  | <input type="checkbox"/> <sub>1</sub> | <input type="checkbox"/> <sub>2</sub>                                                                                                  | <input type="checkbox"/> <sub>3</sub> | <input type="checkbox"/> <sub>0</sub> |
| 单核细胞计数 (MO)                                                                                                                                                                                                                                                                                                       |      | <input type="checkbox"/> <sub>1</sub> 10 <sup>9</sup> /L <input type="checkbox"/> <sub>2</sub> 其他: _____  | <input type="checkbox"/> <sub>1</sub> | <input type="checkbox"/> <sub>2</sub>                                                                                                  | <input type="checkbox"/> <sub>3</sub> | <input type="checkbox"/> <sub>0</sub> |
| 嗜酸性粒细胞计数 (EO)                                                                                                                                                                                                                                                                                                     |      | <input type="checkbox"/> <sub>1</sub> 10 <sup>9</sup> /L <input type="checkbox"/> <sub>2</sub> 其他: _____  | <input type="checkbox"/> <sub>1</sub> | <input type="checkbox"/> <sub>2</sub>                                                                                                  | <input type="checkbox"/> <sub>3</sub> | <input type="checkbox"/> <sub>0</sub> |
| 嗜碱性粒细胞计数 (BA)                                                                                                                                                                                                                                                                                                     |      | <input type="checkbox"/> <sub>1</sub> 10 <sup>9</sup> /L <input type="checkbox"/> <sub>2</sub> 其他: _____  | <input type="checkbox"/> <sub>1</sub> | <input type="checkbox"/> <sub>2</sub>                                                                                                  | <input type="checkbox"/> <sub>3</sub> | <input type="checkbox"/> <sub>0</sub> |

| <b>血常规</b> <input type="checkbox"/> <sub>0</sub> 未查, 原因 _____                                                                                                                                                                                                                                                     |      |                                                                                                           |                                       |                                                                                                                                        |                                       |                                       |
|-------------------------------------------------------------------------------------------------------------------------------------------------------------------------------------------------------------------------------------------------------------------------------------------------------------------|------|-----------------------------------------------------------------------------------------------------------|---------------------------------------|----------------------------------------------------------------------------------------------------------------------------------------|---------------------------------------|---------------------------------------|
| 采样日期: <input style="width: 40px;" type="text"/> <input style="width: 40px;" type="text"/> <input style="width: 40px;" type="text"/> 年 <input style="width: 40px;" type="text"/> <input style="width: 40px;" type="text"/> 月 <input style="width: 40px;" type="text"/> <input style="width: 40px;" type="text"/> 日 |      |                                                                                                           |                                       | 正常值范围编号: <input style="width: 40px;" type="text"/> <input style="width: 40px;" type="text"/> <input style="width: 40px;" type="text"/> |                                       |                                       |
| 检查项目                                                                                                                                                                                                                                                                                                              | 测量结果 |                                                                                                           | 结果判定                                  |                                                                                                                                        |                                       | 未查                                    |
|                                                                                                                                                                                                                                                                                                                   | 实测值  | 单位                                                                                                        | 正常                                    | 异常                                                                                                                                     |                                       |                                       |
|                                                                                                                                                                                                                                                                                                                   |      |                                                                                                           |                                       | 无临床意义                                                                                                                                  | 有临床意义                                 |                                       |
| 红细胞计数 (RBC)                                                                                                                                                                                                                                                                                                       |      | <input type="checkbox"/> <sub>1</sub> 10 <sup>12</sup> /L <input type="checkbox"/> <sub>2</sub> 其他: _____ | <input type="checkbox"/> <sub>1</sub> | <input type="checkbox"/> <sub>2</sub>                                                                                                  | <input type="checkbox"/> <sub>3</sub> | <input type="checkbox"/> <sub>0</sub> |
| 白细胞计数 (WBC)                                                                                                                                                                                                                                                                                                       |      | <input type="checkbox"/> <sub>1</sub> 10 <sup>9</sup> /L <input type="checkbox"/> <sub>2</sub> 其他: _____  | <input type="checkbox"/> <sub>1</sub> | <input type="checkbox"/> <sub>2</sub>                                                                                                  | <input type="checkbox"/> <sub>3</sub> | <input type="checkbox"/> <sub>0</sub> |
| 血红蛋白 (Hb)                                                                                                                                                                                                                                                                                                         |      | <input type="checkbox"/> <sub>1</sub> g/L <input type="checkbox"/> <sub>2</sub> 其他: _____                 | <input type="checkbox"/> <sub>1</sub> | <input type="checkbox"/> <sub>2</sub>                                                                                                  | <input type="checkbox"/> <sub>3</sub> | <input type="checkbox"/> <sub>0</sub> |
| 血小板计数 (PLT)                                                                                                                                                                                                                                                                                                       |      | <input type="checkbox"/> <sub>1</sub> 10 <sup>9</sup> /L <input type="checkbox"/> <sub>2</sub> 其他: _____  | <input type="checkbox"/> <sub>1</sub> | <input type="checkbox"/> <sub>2</sub>                                                                                                  | <input type="checkbox"/> <sub>3</sub> | <input type="checkbox"/> <sub>0</sub> |
| 中性粒细胞计数 (ANC)                                                                                                                                                                                                                                                                                                     |      | <input type="checkbox"/> <sub>1</sub> 10 <sup>9</sup> /L <input type="checkbox"/> <sub>2</sub> 其他: _____  | <input type="checkbox"/> <sub>1</sub> | <input type="checkbox"/> <sub>2</sub>                                                                                                  | <input type="checkbox"/> <sub>3</sub> | <input type="checkbox"/> <sub>0</sub> |
| 淋巴细胞计数 (LY)                                                                                                                                                                                                                                                                                                       |      | <input type="checkbox"/> <sub>1</sub> 10 <sup>9</sup> /L <input type="checkbox"/> <sub>2</sub> 其他: _____  | <input type="checkbox"/> <sub>1</sub> | <input type="checkbox"/> <sub>2</sub>                                                                                                  | <input type="checkbox"/> <sub>3</sub> | <input type="checkbox"/> <sub>0</sub> |
| 单核细胞计数 (MO)                                                                                                                                                                                                                                                                                                       |      | <input type="checkbox"/> <sub>1</sub> 10 <sup>9</sup> /L <input type="checkbox"/> <sub>2</sub> 其他: _____  | <input type="checkbox"/> <sub>1</sub> | <input type="checkbox"/> <sub>2</sub>                                                                                                  | <input type="checkbox"/> <sub>3</sub> | <input type="checkbox"/> <sub>0</sub> |
| 嗜酸性粒细胞计数 (EO)                                                                                                                                                                                                                                                                                                     |      | <input type="checkbox"/> <sub>1</sub> 10 <sup>9</sup> /L <input type="checkbox"/> <sub>2</sub> 其他: _____  | <input type="checkbox"/> <sub>1</sub> | <input type="checkbox"/> <sub>2</sub>                                                                                                  | <input type="checkbox"/> <sub>3</sub> | <input type="checkbox"/> <sub>0</sub> |
| 嗜碱性粒细胞计数 (BA)                                                                                                                                                                                                                                                                                                     |      | <input type="checkbox"/> <sub>1</sub> 10 <sup>9</sup> /L <input type="checkbox"/> <sub>2</sub> 其他: _____  | <input type="checkbox"/> <sub>1</sub> | <input type="checkbox"/> <sub>2</sub>                                                                                                  | <input type="checkbox"/> <sub>3</sub> | <input type="checkbox"/> <sub>0</sub> |

|                                                                                            |                 |
|--------------------------------------------------------------------------------------------|-----------------|
| 研究方案编号: KY2020-29                                                                          | <b>附表-计划外检查</b> |
| 研究中心编号 <input style="width: 40px;" type="text"/> <input style="width: 40px;" type="text"/> |                 |

| <b>血生化</b> <input type="checkbox"/> 未查, 原因 _____                                                                                                                                                                                                                       |                                                                                              |                                       |                                       |                                                                                                                                                                                  |                                       |    |
|------------------------------------------------------------------------------------------------------------------------------------------------------------------------------------------------------------------------------------------------------------------------|----------------------------------------------------------------------------------------------|---------------------------------------|---------------------------------------|----------------------------------------------------------------------------------------------------------------------------------------------------------------------------------|---------------------------------------|----|
| 采样日期 <input style="width: 40px;" type="text"/> <input style="width: 40px;" type="text"/> 年 <input style="width: 40px;" type="text"/> <input style="width: 40px;" type="text"/> 月 <input style="width: 40px;" type="text"/> <input style="width: 40px;" type="text"/> 日 |                                                                                              |                                       |                                       | 正常值范围编号: <input style="width: 40px;" type="text"/> <input style="width: 40px;" type="text"/> <input style="width: 40px;" type="text"/> <input style="width: 40px;" type="text"/> |                                       |    |
| 检查项目                                                                                                                                                                                                                                                                   | 测量结果                                                                                         |                                       | 结果判定                                  |                                                                                                                                                                                  |                                       | 未查 |
|                                                                                                                                                                                                                                                                        | 实测值                                                                                          | 单位                                    | 正常                                    | 异常                                                                                                                                                                               |                                       |    |
|                                                                                                                                                                                                                                                                        |                                                                                              |                                       |                                       | 无临床意义                                                                                                                                                                            | 有临床意义                                 |    |
| 谷丙转氨酶 (ALT)                                                                                                                                                                                                                                                            | <input type="checkbox"/> <sub>1</sub> U/L <input type="checkbox"/> <sub>2</sub> 其他: _____    | <input type="checkbox"/> <sub>1</sub> | <input type="checkbox"/> <sub>2</sub> | <input type="checkbox"/> <sub>3</sub>                                                                                                                                            | <input type="checkbox"/> <sub>0</sub> |    |
| 谷草转氨酶 (AST)                                                                                                                                                                                                                                                            | <input type="checkbox"/> <sub>1</sub> U/L <input type="checkbox"/> <sub>2</sub> 其他: _____    | <input type="checkbox"/> <sub>1</sub> | <input type="checkbox"/> <sub>2</sub> | <input type="checkbox"/> <sub>3</sub>                                                                                                                                            | <input type="checkbox"/> <sub>0</sub> |    |
| 总胆红素 (TBIL)                                                                                                                                                                                                                                                            | <input type="checkbox"/> <sub>1</sub> μmol/L <input type="checkbox"/> <sub>2</sub> 其他: _____ | <input type="checkbox"/> <sub>1</sub> | <input type="checkbox"/> <sub>2</sub> | <input type="checkbox"/> <sub>3</sub>                                                                                                                                            | <input type="checkbox"/> <sub>0</sub> |    |
| 白蛋白 (ALB)                                                                                                                                                                                                                                                              | <input type="checkbox"/> <sub>1</sub> g/L <input type="checkbox"/> <sub>2</sub> 其他: _____    | <input type="checkbox"/> <sub>1</sub> | <input type="checkbox"/> <sub>2</sub> | <input type="checkbox"/> <sub>3</sub>                                                                                                                                            | <input type="checkbox"/> <sub>0</sub> |    |
| γ-谷氨酰转肽酶 (GGT)                                                                                                                                                                                                                                                         | <input type="checkbox"/> <sub>1</sub> U/L <input type="checkbox"/> <sub>2</sub> 其他: _____    | <input type="checkbox"/> <sub>1</sub> | <input type="checkbox"/> <sub>2</sub> | <input type="checkbox"/> <sub>3</sub>                                                                                                                                            | <input type="checkbox"/> <sub>0</sub> |    |
| 乳酸脱氢酶 (LDH)                                                                                                                                                                                                                                                            | <input type="checkbox"/> <sub>1</sub> U/L <input type="checkbox"/> <sub>2</sub> 其他: _____    | <input type="checkbox"/> <sub>1</sub> | <input type="checkbox"/> <sub>2</sub> | <input type="checkbox"/> <sub>3</sub>                                                                                                                                            | <input type="checkbox"/> <sub>0</sub> |    |
| 肌酸激酶 (CK)                                                                                                                                                                                                                                                              | <input type="checkbox"/> <sub>1</sub> U/L <input type="checkbox"/> <sub>2</sub> 其他: _____    | <input type="checkbox"/> <sub>1</sub> | <input type="checkbox"/> <sub>2</sub> | <input type="checkbox"/> <sub>3</sub>                                                                                                                                            | <input type="checkbox"/> <sub>0</sub> |    |
| 肌酸激酶同工酶 (CK-MB)                                                                                                                                                                                                                                                        | <input type="checkbox"/> <sub>1</sub> U/L <input type="checkbox"/> <sub>2</sub> 其他: _____    | <input type="checkbox"/> <sub>1</sub> | <input type="checkbox"/> <sub>2</sub> | <input type="checkbox"/> <sub>3</sub>                                                                                                                                            | <input type="checkbox"/> <sub>0</sub> |    |
| 血尿素氮 (BUN)                                                                                                                                                                                                                                                             | <input type="checkbox"/> <sub>1</sub> mmol/L <input type="checkbox"/> <sub>2</sub> 其他: _____ | <input type="checkbox"/> <sub>1</sub> | <input type="checkbox"/> <sub>2</sub> | <input type="checkbox"/> <sub>3</sub>                                                                                                                                            | <input type="checkbox"/> <sub>0</sub> |    |
| 尿素 (Urea)                                                                                                                                                                                                                                                              | <input type="checkbox"/> <sub>1</sub> mmol/L <input type="checkbox"/> <sub>2</sub> 其他: _____ | <input type="checkbox"/> <sub>1</sub> | <input type="checkbox"/> <sub>2</sub> | <input type="checkbox"/> <sub>3</sub>                                                                                                                                            | <input type="checkbox"/> <sub>0</sub> |    |
| 血肌酐 (CR)                                                                                                                                                                                                                                                               | <input type="checkbox"/> <sub>1</sub> μmol/L <input type="checkbox"/> <sub>2</sub> 其他: _____ | <input type="checkbox"/> <sub>1</sub> | <input type="checkbox"/> <sub>2</sub> | <input type="checkbox"/> <sub>3</sub>                                                                                                                                            | <input type="checkbox"/> <sub>0</sub> |    |

| <b>血生化</b> <input type="checkbox"/> 未查, 原因 _____                                                                                                                                                                                                                       |                                                                                              |                                       |                                       |                                                                                                                                                                                  |                                       |    |
|------------------------------------------------------------------------------------------------------------------------------------------------------------------------------------------------------------------------------------------------------------------------|----------------------------------------------------------------------------------------------|---------------------------------------|---------------------------------------|----------------------------------------------------------------------------------------------------------------------------------------------------------------------------------|---------------------------------------|----|
| 采样日期 <input style="width: 40px;" type="text"/> <input style="width: 40px;" type="text"/> 年 <input style="width: 40px;" type="text"/> <input style="width: 40px;" type="text"/> 月 <input style="width: 40px;" type="text"/> <input style="width: 40px;" type="text"/> 日 |                                                                                              |                                       |                                       | 正常值范围编号: <input style="width: 40px;" type="text"/> <input style="width: 40px;" type="text"/> <input style="width: 40px;" type="text"/> <input style="width: 40px;" type="text"/> |                                       |    |
| 检查项目                                                                                                                                                                                                                                                                   | 测量结果                                                                                         |                                       | 结果判定                                  |                                                                                                                                                                                  |                                       | 未查 |
|                                                                                                                                                                                                                                                                        | 实测值                                                                                          | 单位                                    | 正常                                    | 异常                                                                                                                                                                               |                                       |    |
|                                                                                                                                                                                                                                                                        |                                                                                              |                                       |                                       | 无临床意义                                                                                                                                                                            | 有临床意义                                 |    |
| 谷丙转氨酶 (ALT)                                                                                                                                                                                                                                                            | <input type="checkbox"/> <sub>1</sub> U/L <input type="checkbox"/> <sub>2</sub> 其他: _____    | <input type="checkbox"/> <sub>1</sub> | <input type="checkbox"/> <sub>2</sub> | <input type="checkbox"/> <sub>3</sub>                                                                                                                                            | <input type="checkbox"/> <sub>0</sub> |    |
| 谷草转氨酶 (AST)                                                                                                                                                                                                                                                            | <input type="checkbox"/> <sub>1</sub> U/L <input type="checkbox"/> <sub>2</sub> 其他: _____    | <input type="checkbox"/> <sub>1</sub> | <input type="checkbox"/> <sub>2</sub> | <input type="checkbox"/> <sub>3</sub>                                                                                                                                            | <input type="checkbox"/> <sub>0</sub> |    |
| 总胆红素 (TBIL)                                                                                                                                                                                                                                                            | <input type="checkbox"/> <sub>1</sub> μmol/L <input type="checkbox"/> <sub>2</sub> 其他: _____ | <input type="checkbox"/> <sub>1</sub> | <input type="checkbox"/> <sub>2</sub> | <input type="checkbox"/> <sub>3</sub>                                                                                                                                            | <input type="checkbox"/> <sub>0</sub> |    |
| 白蛋白 (ALB)                                                                                                                                                                                                                                                              | <input type="checkbox"/> <sub>1</sub> g/L <input type="checkbox"/> <sub>2</sub> 其他: _____    | <input type="checkbox"/> <sub>1</sub> | <input type="checkbox"/> <sub>2</sub> | <input type="checkbox"/> <sub>3</sub>                                                                                                                                            | <input type="checkbox"/> <sub>0</sub> |    |
| γ-谷氨酰转肽酶 (GGT)                                                                                                                                                                                                                                                         | <input type="checkbox"/> <sub>1</sub> U/L <input type="checkbox"/> <sub>2</sub> 其他: _____    | <input type="checkbox"/> <sub>1</sub> | <input type="checkbox"/> <sub>2</sub> | <input type="checkbox"/> <sub>3</sub>                                                                                                                                            | <input type="checkbox"/> <sub>0</sub> |    |
| 乳酸脱氢酶 (LDH)                                                                                                                                                                                                                                                            | <input type="checkbox"/> <sub>1</sub> U/L <input type="checkbox"/> <sub>2</sub> 其他: _____    | <input type="checkbox"/> <sub>1</sub> | <input type="checkbox"/> <sub>2</sub> | <input type="checkbox"/> <sub>3</sub>                                                                                                                                            | <input type="checkbox"/> <sub>0</sub> |    |
| 肌酸激酶 (CK)                                                                                                                                                                                                                                                              | <input type="checkbox"/> <sub>1</sub> U/L <input type="checkbox"/> <sub>2</sub> 其他: _____    | <input type="checkbox"/> <sub>1</sub> | <input type="checkbox"/> <sub>2</sub> | <input type="checkbox"/> <sub>3</sub>                                                                                                                                            | <input type="checkbox"/> <sub>0</sub> |    |
| 肌酸激酶同工酶 (CK-MB)                                                                                                                                                                                                                                                        | <input type="checkbox"/> <sub>1</sub> U/L <input type="checkbox"/> <sub>2</sub> 其他: _____    | <input type="checkbox"/> <sub>1</sub> | <input type="checkbox"/> <sub>2</sub> | <input type="checkbox"/> <sub>3</sub>                                                                                                                                            | <input type="checkbox"/> <sub>0</sub> |    |
| 血尿素氮 (BUN)                                                                                                                                                                                                                                                             | <input type="checkbox"/> <sub>1</sub> mmol/L <input type="checkbox"/> <sub>2</sub> 其他: _____ | <input type="checkbox"/> <sub>1</sub> | <input type="checkbox"/> <sub>2</sub> | <input type="checkbox"/> <sub>3</sub>                                                                                                                                            | <input type="checkbox"/> <sub>0</sub> |    |
| 尿素 (Urea)                                                                                                                                                                                                                                                              | <input type="checkbox"/> <sub>1</sub> mmol/L <input type="checkbox"/> <sub>2</sub> 其他: _____ | <input type="checkbox"/> <sub>1</sub> | <input type="checkbox"/> <sub>2</sub> | <input type="checkbox"/> <sub>3</sub>                                                                                                                                            | <input type="checkbox"/> <sub>0</sub> |    |
| 血肌酐 (CR)                                                                                                                                                                                                                                                               | <input type="checkbox"/> <sub>1</sub> μmol/L <input type="checkbox"/> <sub>2</sub> 其他: _____ | <input type="checkbox"/> <sub>1</sub> | <input type="checkbox"/> <sub>2</sub> | <input type="checkbox"/> <sub>3</sub>                                                                                                                                            | <input type="checkbox"/> <sub>0</sub> |    |

|                                                                                            |                 |
|--------------------------------------------------------------------------------------------|-----------------|
| 研究方案编号: KY2020-29                                                                          | <b>附表-计划外检查</b> |
| 研究中心编号 <input style="width: 50px;" type="text"/> <input style="width: 50px;" type="text"/> |                 |

| 尿常规 <input type="checkbox"/> 未查, 原因 _____                                                                                                                                                                                         |      |                                                                                              |                                       |                                                                                                                                        |                                       |                                       |
|-----------------------------------------------------------------------------------------------------------------------------------------------------------------------------------------------------------------------------------|------|----------------------------------------------------------------------------------------------|---------------------------------------|----------------------------------------------------------------------------------------------------------------------------------------|---------------------------------------|---------------------------------------|
| 采样日期: <input style="width: 20px;" type="text"/> / <input style="width: 20px;" type="text"/> / <input style="width: 20px;" type="text"/> 年 <input style="width: 20px;" type="text"/> 月 <input style="width: 20px;" type="text"/> 日 |      |                                                                                              |                                       | 正常值范围编号: <input style="width: 20px;" type="text"/> <input style="width: 20px;" type="text"/> <input style="width: 20px;" type="text"/> |                                       |                                       |
| 检查项目                                                                                                                                                                                                                              | 测量结果 |                                                                                              | 结果判定                                  |                                                                                                                                        |                                       | 未查                                    |
|                                                                                                                                                                                                                                   | 实测值  | 单位                                                                                           | 正常                                    | 异常                                                                                                                                     |                                       |                                       |
|                                                                                                                                                                                                                                   |      |                                                                                              |                                       | 无临床意义                                                                                                                                  | 有临床意义                                 |                                       |
| 尿蛋白                                                                                                                                                                                                                               |      | <input type="checkbox"/> <sub>1</sub> 不适用 <input type="checkbox"/> <sub>2</sub> 其他: _____    | <input type="checkbox"/> <sub>1</sub> | <input type="checkbox"/> <sub>2</sub>                                                                                                  | <input type="checkbox"/> <sub>3</sub> | <input type="checkbox"/> <sub>0</sub> |
| 尿葡萄糖                                                                                                                                                                                                                              |      | <input type="checkbox"/> <sub>1</sub> mmol/L <input type="checkbox"/> <sub>2</sub> 其他: _____ | <input type="checkbox"/> <sub>1</sub> | <input type="checkbox"/> <sub>2</sub>                                                                                                  | <input type="checkbox"/> <sub>3</sub> | <input type="checkbox"/> <sub>0</sub> |
| 尿 PH 值                                                                                                                                                                                                                            |      | <input type="checkbox"/> <sub>1</sub> 不适用 <input type="checkbox"/> <sub>2</sub> 其他: _____    | <input type="checkbox"/> <sub>1</sub> | <input type="checkbox"/> <sub>2</sub>                                                                                                  | <input type="checkbox"/> <sub>3</sub> | <input type="checkbox"/> <sub>0</sub> |
| 尿红细胞                                                                                                                                                                                                                              |      | <input type="checkbox"/> <sub>1</sub> 不适用 <input type="checkbox"/> <sub>2</sub> 其他: _____    | <input type="checkbox"/> <sub>1</sub> | <input type="checkbox"/> <sub>2</sub>                                                                                                  | <input type="checkbox"/> <sub>3</sub> | <input type="checkbox"/> <sub>0</sub> |
| 尿白细胞                                                                                                                                                                                                                              |      | <input type="checkbox"/> <sub>1</sub> 不适用 <input type="checkbox"/> <sub>2</sub> 其他: _____    | <input type="checkbox"/> <sub>1</sub> | <input type="checkbox"/> <sub>2</sub>                                                                                                  | <input type="checkbox"/> <sub>3</sub> | <input type="checkbox"/> <sub>0</sub> |
| 尿酮体                                                                                                                                                                                                                               |      | <input type="checkbox"/> <sub>1</sub> 不适用 <input type="checkbox"/> <sub>2</sub> 其他: _____    | <input type="checkbox"/> <sub>1</sub> | <input type="checkbox"/> <sub>2</sub>                                                                                                  | <input type="checkbox"/> <sub>3</sub> | <input type="checkbox"/> <sub>0</sub> |

| 尿常规 <input type="checkbox"/> 未查, 原因 _____                                                                                                                                                                                         |      |                                                                                              |                                       |                                                                                                                                        |                                       |                                       |
|-----------------------------------------------------------------------------------------------------------------------------------------------------------------------------------------------------------------------------------|------|----------------------------------------------------------------------------------------------|---------------------------------------|----------------------------------------------------------------------------------------------------------------------------------------|---------------------------------------|---------------------------------------|
| 采样日期: <input style="width: 20px;" type="text"/> / <input style="width: 20px;" type="text"/> / <input style="width: 20px;" type="text"/> 年 <input style="width: 20px;" type="text"/> 月 <input style="width: 20px;" type="text"/> 日 |      |                                                                                              |                                       | 正常值范围编号: <input style="width: 20px;" type="text"/> <input style="width: 20px;" type="text"/> <input style="width: 20px;" type="text"/> |                                       |                                       |
| 检查项目                                                                                                                                                                                                                              | 测量结果 |                                                                                              | 结果判定                                  |                                                                                                                                        |                                       | 未查                                    |
|                                                                                                                                                                                                                                   | 实测值  | 单位                                                                                           | 正常                                    | 异常                                                                                                                                     |                                       |                                       |
|                                                                                                                                                                                                                                   |      |                                                                                              |                                       | 无临床意义                                                                                                                                  | 有临床意义                                 |                                       |
| 尿蛋白                                                                                                                                                                                                                               |      | <input type="checkbox"/> <sub>1</sub> 不适用 <input type="checkbox"/> <sub>2</sub> 其他: _____    | <input type="checkbox"/> <sub>1</sub> | <input type="checkbox"/> <sub>2</sub>                                                                                                  | <input type="checkbox"/> <sub>3</sub> | <input type="checkbox"/> <sub>0</sub> |
| 尿葡萄糖                                                                                                                                                                                                                              |      | <input type="checkbox"/> <sub>1</sub> mmol/L <input type="checkbox"/> <sub>2</sub> 其他: _____ | <input type="checkbox"/> <sub>1</sub> | <input type="checkbox"/> <sub>2</sub>                                                                                                  | <input type="checkbox"/> <sub>3</sub> | <input type="checkbox"/> <sub>0</sub> |
| 尿 PH 值                                                                                                                                                                                                                            |      | <input type="checkbox"/> <sub>1</sub> 不适用 <input type="checkbox"/> <sub>2</sub> 其他: _____    | <input type="checkbox"/> <sub>1</sub> | <input type="checkbox"/> <sub>2</sub>                                                                                                  | <input type="checkbox"/> <sub>3</sub> | <input type="checkbox"/> <sub>0</sub> |
| 尿红细胞                                                                                                                                                                                                                              |      | <input type="checkbox"/> <sub>1</sub> 不适用 <input type="checkbox"/> <sub>2</sub> 其他: _____    | <input type="checkbox"/> <sub>1</sub> | <input type="checkbox"/> <sub>2</sub>                                                                                                  | <input type="checkbox"/> <sub>3</sub> | <input type="checkbox"/> <sub>0</sub> |
| 尿白细胞                                                                                                                                                                                                                              |      | <input type="checkbox"/> <sub>1</sub> 不适用 <input type="checkbox"/> <sub>2</sub> 其他: _____    | <input type="checkbox"/> <sub>1</sub> | <input type="checkbox"/> <sub>2</sub>                                                                                                  | <input type="checkbox"/> <sub>3</sub> | <input type="checkbox"/> <sub>0</sub> |
| 尿酮体                                                                                                                                                                                                                               |      | <input type="checkbox"/> <sub>1</sub> 不适用 <input type="checkbox"/> <sub>2</sub> 其他: _____    | <input type="checkbox"/> <sub>1</sub> | <input type="checkbox"/> <sub>2</sub>                                                                                                  | <input type="checkbox"/> <sub>3</sub> | <input type="checkbox"/> <sub>0</sub> |

| 尿常规 <input type="checkbox"/> 未查, 原因 _____                                                                                                                                                                                         |      |                                                                                              |                                       |                                                                                                                                        |                                       |                                       |
|-----------------------------------------------------------------------------------------------------------------------------------------------------------------------------------------------------------------------------------|------|----------------------------------------------------------------------------------------------|---------------------------------------|----------------------------------------------------------------------------------------------------------------------------------------|---------------------------------------|---------------------------------------|
| 采样日期: <input style="width: 20px;" type="text"/> / <input style="width: 20px;" type="text"/> / <input style="width: 20px;" type="text"/> 年 <input style="width: 20px;" type="text"/> 月 <input style="width: 20px;" type="text"/> 日 |      |                                                                                              |                                       | 正常值范围编号: <input style="width: 20px;" type="text"/> <input style="width: 20px;" type="text"/> <input style="width: 20px;" type="text"/> |                                       |                                       |
| 检查项目                                                                                                                                                                                                                              | 测量结果 |                                                                                              | 结果判定                                  |                                                                                                                                        |                                       | 未查                                    |
|                                                                                                                                                                                                                                   | 实测值  | 单位                                                                                           | 正常                                    | 异常                                                                                                                                     |                                       |                                       |
|                                                                                                                                                                                                                                   |      |                                                                                              |                                       | 无临床意义                                                                                                                                  | 有临床意义                                 |                                       |
| 尿蛋白                                                                                                                                                                                                                               |      | <input type="checkbox"/> <sub>1</sub> 不适用 <input type="checkbox"/> <sub>2</sub> 其他: _____    | <input type="checkbox"/> <sub>1</sub> | <input type="checkbox"/> <sub>2</sub>                                                                                                  | <input type="checkbox"/> <sub>3</sub> | <input type="checkbox"/> <sub>0</sub> |
| 尿葡萄糖                                                                                                                                                                                                                              |      | <input type="checkbox"/> <sub>1</sub> mmol/L <input type="checkbox"/> <sub>2</sub> 其他: _____ | <input type="checkbox"/> <sub>1</sub> | <input type="checkbox"/> <sub>2</sub>                                                                                                  | <input type="checkbox"/> <sub>3</sub> | <input type="checkbox"/> <sub>0</sub> |
| 尿 PH 值                                                                                                                                                                                                                            |      | <input type="checkbox"/> <sub>1</sub> 不适用 <input type="checkbox"/> <sub>2</sub> 其他: _____    | <input type="checkbox"/> <sub>1</sub> | <input type="checkbox"/> <sub>2</sub>                                                                                                  | <input type="checkbox"/> <sub>3</sub> | <input type="checkbox"/> <sub>0</sub> |
| 尿红细胞                                                                                                                                                                                                                              |      | <input type="checkbox"/> <sub>1</sub> 不适用 <input type="checkbox"/> <sub>2</sub> 其他: _____    | <input type="checkbox"/> <sub>1</sub> | <input type="checkbox"/> <sub>2</sub>                                                                                                  | <input type="checkbox"/> <sub>3</sub> | <input type="checkbox"/> <sub>0</sub> |
| 尿白细胞                                                                                                                                                                                                                              |      | <input type="checkbox"/> <sub>1</sub> 不适用 <input type="checkbox"/> <sub>2</sub> 其他: _____    | <input type="checkbox"/> <sub>1</sub> | <input type="checkbox"/> <sub>2</sub>                                                                                                  | <input type="checkbox"/> <sub>3</sub> | <input type="checkbox"/> <sub>0</sub> |
| 尿酮体                                                                                                                                                                                                                               |      | <input type="checkbox"/> <sub>1</sub> 不适用 <input type="checkbox"/> <sub>2</sub> 其他: _____    | <input type="checkbox"/> <sub>1</sub> | <input type="checkbox"/> <sub>2</sub>                                                                                                  | <input type="checkbox"/> <sub>3</sub> | <input type="checkbox"/> <sub>0</sub> |

|                             |          |
|-----------------------------|----------|
| 研究方案编号: KY2020-29           | 附表-计划外检查 |
| 研究中心编号 <input type="text"/> |          |

受试者筛选号

| 凝血功能 <input type="checkbox"/> 未查, 原因 <input type="text"/>                  |                                           |                                                                |                                       |                                       |                                       |                                       |
|----------------------------------------------------------------------------|-------------------------------------------|----------------------------------------------------------------|---------------------------------------|---------------------------------------|---------------------------------------|---------------------------------------|
| 采样日期: <input type="text"/> 年 <input type="text"/> 月 <input type="text"/> 日 |                                           |                                                                |                                       | 正常值范围编号: <input type="text"/>         |                                       |                                       |
| 检查项目                                                                       | 测量结果                                      |                                                                | 结果判定                                  |                                       |                                       | 未查                                    |
|                                                                            | 实测值                                       | 单位                                                             | 正常                                    | 异常                                    |                                       |                                       |
|                                                                            |                                           |                                                                |                                       | 无临床意义                                 | 有临床意义                                 |                                       |
| 凝血酶原时间 (PT)                                                                | <input type="checkbox"/> <sub>1</sub> S   | <input type="checkbox"/> <sub>2</sub> 其他: <input type="text"/> | <input type="checkbox"/> <sub>1</sub> | <input type="checkbox"/> <sub>2</sub> | <input type="checkbox"/> <sub>3</sub> | <input type="checkbox"/> <sub>0</sub> |
| 活化部分凝血活酶时间 (APTT)                                                          | <input type="checkbox"/> <sub>1</sub> S   | <input type="checkbox"/> <sub>2</sub> 其他: <input type="text"/> | <input type="checkbox"/> <sub>1</sub> | <input type="checkbox"/> <sub>2</sub> | <input type="checkbox"/> <sub>3</sub> | <input type="checkbox"/> <sub>0</sub> |
| 凝血酶时间 (TT)                                                                 | <input type="checkbox"/> <sub>1</sub> S   | <input type="checkbox"/> <sub>2</sub> 其他: <input type="text"/> | <input type="checkbox"/> <sub>1</sub> | <input type="checkbox"/> <sub>2</sub> | <input type="checkbox"/> <sub>3</sub> | <input type="checkbox"/> <sub>0</sub> |
| 血浆纤维蛋白原 (Fbg)                                                              | <input type="checkbox"/> <sub>1</sub> g/L | <input type="checkbox"/> <sub>2</sub> 其他: <input type="text"/> | <input type="checkbox"/> <sub>1</sub> | <input type="checkbox"/> <sub>2</sub> | <input type="checkbox"/> <sub>3</sub> | <input type="checkbox"/> <sub>0</sub> |
| 国际标准化比率 (INR)                                                              | <input type="checkbox"/> <sub>1</sub> 不适用 | <input type="checkbox"/> <sub>2</sub> 其他: <input type="text"/> | <input type="checkbox"/> <sub>1</sub> | <input type="checkbox"/> <sub>2</sub> | <input type="checkbox"/> <sub>3</sub> | <input type="checkbox"/> <sub>0</sub> |

| 凝血功能 <input type="checkbox"/> 未查, 原因 <input type="text"/>                  |                                           |                                                                |                                       |                                       |                                       |                                       |
|----------------------------------------------------------------------------|-------------------------------------------|----------------------------------------------------------------|---------------------------------------|---------------------------------------|---------------------------------------|---------------------------------------|
| 采样日期: <input type="text"/> 年 <input type="text"/> 月 <input type="text"/> 日 |                                           |                                                                |                                       | 正常值范围编号: <input type="text"/>         |                                       |                                       |
| 检查项目                                                                       | 测量结果                                      |                                                                | 结果判定                                  |                                       |                                       | 未查                                    |
|                                                                            | 实测值                                       | 单位                                                             | 正常                                    | 异常                                    |                                       |                                       |
|                                                                            |                                           |                                                                |                                       | 无临床意义                                 | 有临床意义                                 |                                       |
| 凝血酶原时间 (PT)                                                                | <input type="checkbox"/> <sub>1</sub> S   | <input type="checkbox"/> <sub>2</sub> 其他: <input type="text"/> | <input type="checkbox"/> <sub>1</sub> | <input type="checkbox"/> <sub>2</sub> | <input type="checkbox"/> <sub>3</sub> | <input type="checkbox"/> <sub>0</sub> |
| 活化部分凝血活酶时间 (APTT)                                                          | <input type="checkbox"/> <sub>1</sub> S   | <input type="checkbox"/> <sub>2</sub> 其他: <input type="text"/> | <input type="checkbox"/> <sub>1</sub> | <input type="checkbox"/> <sub>2</sub> | <input type="checkbox"/> <sub>3</sub> | <input type="checkbox"/> <sub>0</sub> |
| 凝血酶时间 (TT)                                                                 | <input type="checkbox"/> <sub>1</sub> S   | <input type="checkbox"/> <sub>2</sub> 其他: <input type="text"/> | <input type="checkbox"/> <sub>1</sub> | <input type="checkbox"/> <sub>2</sub> | <input type="checkbox"/> <sub>3</sub> | <input type="checkbox"/> <sub>0</sub> |
| 血浆纤维蛋白原 (Fbg)                                                              | <input type="checkbox"/> <sub>1</sub> g/L | <input type="checkbox"/> <sub>2</sub> 其他: <input type="text"/> | <input type="checkbox"/> <sub>1</sub> | <input type="checkbox"/> <sub>2</sub> | <input type="checkbox"/> <sub>3</sub> | <input type="checkbox"/> <sub>0</sub> |
| 国际标准化比率 (INR)                                                              | <input type="checkbox"/> <sub>1</sub> 不适用 | <input type="checkbox"/> <sub>2</sub> 其他: <input type="text"/> | <input type="checkbox"/> <sub>1</sub> | <input type="checkbox"/> <sub>2</sub> | <input type="checkbox"/> <sub>3</sub> | <input type="checkbox"/> <sub>0</sub> |

| 凝血功能 <input type="checkbox"/> 未查, 原因 <input type="text"/>                  |                                           |                                                                |                                       |                                       |                                       |                                       |
|----------------------------------------------------------------------------|-------------------------------------------|----------------------------------------------------------------|---------------------------------------|---------------------------------------|---------------------------------------|---------------------------------------|
| 采样日期: <input type="text"/> 年 <input type="text"/> 月 <input type="text"/> 日 |                                           |                                                                |                                       | 正常值范围编号: <input type="text"/>         |                                       |                                       |
| 检查项目                                                                       | 测量结果                                      |                                                                | 结果判定                                  |                                       |                                       | 未查                                    |
|                                                                            | 实测值                                       | 单位                                                             | 正常                                    | 异常                                    |                                       |                                       |
|                                                                            |                                           |                                                                |                                       | 无临床意义                                 | 有临床意义                                 |                                       |
| 凝血酶原时间 (PT)                                                                | <input type="checkbox"/> <sub>1</sub> S   | <input type="checkbox"/> <sub>2</sub> 其他: <input type="text"/> | <input type="checkbox"/> <sub>1</sub> | <input type="checkbox"/> <sub>2</sub> | <input type="checkbox"/> <sub>3</sub> | <input type="checkbox"/> <sub>0</sub> |
| 活化部分凝血活酶时间 (APTT)                                                          | <input type="checkbox"/> <sub>1</sub> S   | <input type="checkbox"/> <sub>2</sub> 其他: <input type="text"/> | <input type="checkbox"/> <sub>1</sub> | <input type="checkbox"/> <sub>2</sub> | <input type="checkbox"/> <sub>3</sub> | <input type="checkbox"/> <sub>0</sub> |
| 凝血酶时间 (TT)                                                                 | <input type="checkbox"/> <sub>1</sub> S   | <input type="checkbox"/> <sub>2</sub> 其他: <input type="text"/> | <input type="checkbox"/> <sub>1</sub> | <input type="checkbox"/> <sub>2</sub> | <input type="checkbox"/> <sub>3</sub> | <input type="checkbox"/> <sub>0</sub> |
| 血浆纤维蛋白原 (Fbg)                                                              | <input type="checkbox"/> <sub>1</sub> g/L | <input type="checkbox"/> <sub>2</sub> 其他: <input type="text"/> | <input type="checkbox"/> <sub>1</sub> | <input type="checkbox"/> <sub>2</sub> | <input type="checkbox"/> <sub>3</sub> | <input type="checkbox"/> <sub>0</sub> |
| 国际标准化比率 (INR)                                                              | <input type="checkbox"/> <sub>1</sub> 不适用 | <input type="checkbox"/> <sub>2</sub> 其他: <input type="text"/> | <input type="checkbox"/> <sub>1</sub> | <input type="checkbox"/> <sub>2</sub> | <input type="checkbox"/> <sub>3</sub> | <input type="checkbox"/> <sub>0</sub> |

|                             |          |
|-----------------------------|----------|
| 研究方案编号: KY2020-29           | 附表-计划外检查 |
| 研究中心编号 <input type="text"/> |          |

| C 反应蛋白 (CRP) <input type="checkbox"/> <sub>0</sub> 未查, 原因 <input type="text"/> |      |                                                                                                           |                               |                                       |                                       |
|--------------------------------------------------------------------------------|------|-----------------------------------------------------------------------------------------------------------|-------------------------------|---------------------------------------|---------------------------------------|
| 采样日期: <input type="text"/> 年 <input type="text"/> 月 <input type="text"/> 日     |      |                                                                                                           | 正常值范围编号: <input type="text"/> |                                       |                                       |
| 检查项目                                                                           | 测量结果 |                                                                                                           | 结果判定                          |                                       |                                       |
| C 反应蛋白 (CRP)                                                                   | 实测值  | 单位                                                                                                        | 正常                            | 异常                                    |                                       |
|                                                                                |      | <input type="checkbox"/> <sub>1</sub> mg/L <input type="checkbox"/> <sub>2</sub> 其他: <input type="text"/> |                               | <input type="checkbox"/> <sub>1</sub> | 无临床意义                                 |
|                                                                                |      |                                                                                                           |                               | <input type="checkbox"/> <sub>2</sub> | <input type="checkbox"/> <sub>3</sub> |

| C 反应蛋白 (CRP) <input type="checkbox"/> <sub>0</sub> 未查, 原因 <input type="text"/> |      |                                                                                                           |                               |                                       |                                       |
|--------------------------------------------------------------------------------|------|-----------------------------------------------------------------------------------------------------------|-------------------------------|---------------------------------------|---------------------------------------|
| 采样日期: <input type="text"/> 年 <input type="text"/> 月 <input type="text"/> 日     |      |                                                                                                           | 正常值范围编号: <input type="text"/> |                                       |                                       |
| 检查项目                                                                           | 测量结果 |                                                                                                           | 结果判定                          |                                       |                                       |
| C 反应蛋白 (CRP)                                                                   | 实测值  | 单位                                                                                                        | 正常                            | 异常                                    |                                       |
|                                                                                |      | <input type="checkbox"/> <sub>1</sub> mg/L <input type="checkbox"/> <sub>2</sub> 其他: <input type="text"/> |                               | <input type="checkbox"/> <sub>1</sub> | 无临床意义                                 |
|                                                                                |      |                                                                                                           |                               | <input type="checkbox"/> <sub>2</sub> | <input type="checkbox"/> <sub>3</sub> |

| C 反应蛋白 (CRP) <input type="checkbox"/> <sub>0</sub> 未查, 原因 <input type="text"/> |      |                                                                                                           |                               |                                       |                                       |
|--------------------------------------------------------------------------------|------|-----------------------------------------------------------------------------------------------------------|-------------------------------|---------------------------------------|---------------------------------------|
| 采样日期: <input type="text"/> 年 <input type="text"/> 月 <input type="text"/> 日     |      |                                                                                                           | 正常值范围编号: <input type="text"/> |                                       |                                       |
| 检查项目                                                                           | 测量结果 |                                                                                                           | 结果判定                          |                                       |                                       |
| C 反应蛋白 (CRP)                                                                   | 实测值  | 单位                                                                                                        | 正常                            | 异常                                    |                                       |
|                                                                                |      | <input type="checkbox"/> <sub>1</sub> mg/L <input type="checkbox"/> <sub>2</sub> 其他: <input type="text"/> |                               | <input type="checkbox"/> <sub>1</sub> | 无临床意义                                 |
|                                                                                |      |                                                                                                           |                               | <input type="checkbox"/> <sub>2</sub> | <input type="checkbox"/> <sub>3</sub> |

| C 反应蛋白 (CRP) <input type="checkbox"/> <sub>0</sub> 未查, 原因 <input type="text"/> |      |                                                                                                           |                               |                                       |                                       |
|--------------------------------------------------------------------------------|------|-----------------------------------------------------------------------------------------------------------|-------------------------------|---------------------------------------|---------------------------------------|
| 采样日期: <input type="text"/> 年 <input type="text"/> 月 <input type="text"/> 日     |      |                                                                                                           | 正常值范围编号: <input type="text"/> |                                       |                                       |
| 检查项目                                                                           | 测量结果 |                                                                                                           | 结果判定                          |                                       |                                       |
| C 反应蛋白 (CRP)                                                                   | 实测值  | 单位                                                                                                        | 正常                            | 异常                                    |                                       |
|                                                                                |      | <input type="checkbox"/> <sub>1</sub> mg/L <input type="checkbox"/> <sub>2</sub> 其他: <input type="text"/> |                               | <input type="checkbox"/> <sub>1</sub> | 无临床意义                                 |
|                                                                                |      |                                                                                                           |                               | <input type="checkbox"/> <sub>2</sub> | <input type="checkbox"/> <sub>3</sub> |

| C 反应蛋白 (CRP) <input type="checkbox"/> <sub>0</sub> 未查, 原因 <input type="text"/> |      |                                                                                                           |                               |                                       |                                       |
|--------------------------------------------------------------------------------|------|-----------------------------------------------------------------------------------------------------------|-------------------------------|---------------------------------------|---------------------------------------|
| 采样日期: <input type="text"/> 年 <input type="text"/> 月 <input type="text"/> 日     |      |                                                                                                           | 正常值范围编号: <input type="text"/> |                                       |                                       |
| 检查项目                                                                           | 测量结果 |                                                                                                           | 结果判定                          |                                       |                                       |
| C 反应蛋白 (CRP)                                                                   | 实测值  | 单位                                                                                                        | 正常                            | 异常                                    |                                       |
|                                                                                |      | <input type="checkbox"/> <sub>1</sub> mg/L <input type="checkbox"/> <sub>2</sub> 其他: <input type="text"/> |                               | <input type="checkbox"/> <sub>1</sub> | 无临床意义                                 |
|                                                                                |      |                                                                                                           |                               | <input type="checkbox"/> <sub>2</sub> | <input type="checkbox"/> <sub>3</sub> |

|                             |          |
|-----------------------------|----------|
| 研究方案编号: KY2020-29           | 附表-计划外检查 |
| 研究中心编号 <input type="text"/> |          |

| 血沉 (ESR) <input type="checkbox"/> 未查, 原因 <input type="text"/>              |      |                                                                                                           |                               |                                       |                                       |
|----------------------------------------------------------------------------|------|-----------------------------------------------------------------------------------------------------------|-------------------------------|---------------------------------------|---------------------------------------|
| 采样日期: <input type="text"/> 年 <input type="text"/> 月 <input type="text"/> 日 |      |                                                                                                           | 正常值范围编号: <input type="text"/> |                                       |                                       |
| 检查项目                                                                       | 测量结果 |                                                                                                           | 结果判定                          |                                       |                                       |
| 血沉 (ESR)                                                                   | 实测值  | 单位                                                                                                        | 正常                            | 异常                                    |                                       |
|                                                                            |      | <input type="checkbox"/> <sub>1</sub> mm/h <input type="checkbox"/> <sub>2</sub> 其他: <input type="text"/> |                               | <input type="checkbox"/> <sub>1</sub> | 无临床意义                                 |
|                                                                            |      |                                                                                                           |                               | <input type="checkbox"/> <sub>2</sub> | <input type="checkbox"/> <sub>3</sub> |

| 血沉 (ESR) <input type="checkbox"/> 未查, 原因 <input type="text"/>              |      |                                                                                                           |                               |                                       |                                       |
|----------------------------------------------------------------------------|------|-----------------------------------------------------------------------------------------------------------|-------------------------------|---------------------------------------|---------------------------------------|
| 采样日期: <input type="text"/> 年 <input type="text"/> 月 <input type="text"/> 日 |      |                                                                                                           | 正常值范围编号: <input type="text"/> |                                       |                                       |
| 检查项目                                                                       | 测量结果 |                                                                                                           | 结果判定                          |                                       |                                       |
| 血沉 (ESR)                                                                   | 实测值  | 单位                                                                                                        | 正常                            | 异常                                    |                                       |
|                                                                            |      | <input type="checkbox"/> <sub>1</sub> mm/h <input type="checkbox"/> <sub>2</sub> 其他: <input type="text"/> |                               | <input type="checkbox"/> <sub>1</sub> | 无临床意义                                 |
|                                                                            |      |                                                                                                           |                               | <input type="checkbox"/> <sub>2</sub> | <input type="checkbox"/> <sub>3</sub> |

| 血沉 (ESR) <input type="checkbox"/> 未查, 原因 <input type="text"/>              |      |                                                                                                           |                               |                                       |                                       |
|----------------------------------------------------------------------------|------|-----------------------------------------------------------------------------------------------------------|-------------------------------|---------------------------------------|---------------------------------------|
| 采样日期: <input type="text"/> 年 <input type="text"/> 月 <input type="text"/> 日 |      |                                                                                                           | 正常值范围编号: <input type="text"/> |                                       |                                       |
| 检查项目                                                                       | 测量结果 |                                                                                                           | 结果判定                          |                                       |                                       |
| 血沉 (ESR)                                                                   | 实测值  | 单位                                                                                                        | 正常                            | 异常                                    |                                       |
|                                                                            |      | <input type="checkbox"/> <sub>1</sub> mm/h <input type="checkbox"/> <sub>2</sub> 其他: <input type="text"/> |                               | <input type="checkbox"/> <sub>1</sub> | 无临床意义                                 |
|                                                                            |      |                                                                                                           |                               | <input type="checkbox"/> <sub>2</sub> | <input type="checkbox"/> <sub>3</sub> |

| 血沉 (ESR) <input type="checkbox"/> 未查, 原因 <input type="text"/>              |      |                                                                                                           |                               |                                       |                                       |
|----------------------------------------------------------------------------|------|-----------------------------------------------------------------------------------------------------------|-------------------------------|---------------------------------------|---------------------------------------|
| 采样日期: <input type="text"/> 年 <input type="text"/> 月 <input type="text"/> 日 |      |                                                                                                           | 正常值范围编号: <input type="text"/> |                                       |                                       |
| 检查项目                                                                       | 测量结果 |                                                                                                           | 结果判定                          |                                       |                                       |
| 血沉 (ESR)                                                                   | 实测值  | 单位                                                                                                        | 正常                            | 异常                                    |                                       |
|                                                                            |      | <input type="checkbox"/> <sub>1</sub> mm/h <input type="checkbox"/> <sub>2</sub> 其他: <input type="text"/> |                               | <input type="checkbox"/> <sub>1</sub> | 无临床意义                                 |
|                                                                            |      |                                                                                                           |                               | <input type="checkbox"/> <sub>2</sub> | <input type="checkbox"/> <sub>3</sub> |

| 血沉 (ESR) <input type="checkbox"/> 未查, 原因 <input type="text"/>              |      |                                                                                                           |                               |                                       |                                       |
|----------------------------------------------------------------------------|------|-----------------------------------------------------------------------------------------------------------|-------------------------------|---------------------------------------|---------------------------------------|
| 采样日期: <input type="text"/> 年 <input type="text"/> 月 <input type="text"/> 日 |      |                                                                                                           | 正常值范围编号: <input type="text"/> |                                       |                                       |
| 检查项目                                                                       | 测量结果 |                                                                                                           | 结果判定                          |                                       |                                       |
| 血沉 (ESR)                                                                   | 实测值  | 单位                                                                                                        | 正常                            | 异常                                    |                                       |
|                                                                            |      | <input type="checkbox"/> <sub>1</sub> mm/h <input type="checkbox"/> <sub>2</sub> 其他: <input type="text"/> |                               | <input type="checkbox"/> <sub>1</sub> | 无临床意义                                 |
|                                                                            |      |                                                                                                           |                               | <input type="checkbox"/> <sub>2</sub> | <input type="checkbox"/> <sub>3</sub> |

|                             |          |
|-----------------------------|----------|
| 研究方案编号: KY2020-29           | 附表-计划外检查 |
| 研究中心编号 <input type="text"/> |          |

| TNF- $\alpha$ <input type="checkbox"/> <sub>0</sub> 未查, 原因 _____           |      |                                                                                             |                               |                                       |                                       |
|----------------------------------------------------------------------------|------|---------------------------------------------------------------------------------------------|-------------------------------|---------------------------------------|---------------------------------------|
| 采样日期: <input type="text"/> 年 <input type="text"/> 月 <input type="text"/> 日 |      |                                                                                             | 正常值范围编号: <input type="text"/> |                                       |                                       |
| 检查项目                                                                       | 测量结果 |                                                                                             | 结果判定                          |                                       |                                       |
| TNF- $\alpha$                                                              | 实测值  | 单位                                                                                          | 正常                            | 异常                                    |                                       |
|                                                                            |      | <input type="checkbox"/> <sub>1</sub> pg/mL <input type="checkbox"/> <sub>2</sub> 其他: _____ |                               | <input type="checkbox"/> <sub>1</sub> | 无临床意义                                 |
|                                                                            |      |                                                                                             |                               | <input type="checkbox"/> <sub>2</sub> | <input type="checkbox"/> <sub>3</sub> |

| TNF- $\alpha$ <input type="checkbox"/> <sub>0</sub> 未查, 原因 _____           |      |                                                                                             |                               |                                       |                                       |
|----------------------------------------------------------------------------|------|---------------------------------------------------------------------------------------------|-------------------------------|---------------------------------------|---------------------------------------|
| 采样日期: <input type="text"/> 年 <input type="text"/> 月 <input type="text"/> 日 |      |                                                                                             | 正常值范围编号: <input type="text"/> |                                       |                                       |
| 检查项目                                                                       | 测量结果 |                                                                                             | 结果判定                          |                                       |                                       |
| TNF- $\alpha$                                                              | 实测值  | 单位                                                                                          | 正常                            | 异常                                    |                                       |
|                                                                            |      | <input type="checkbox"/> <sub>1</sub> pg/mL <input type="checkbox"/> <sub>2</sub> 其他: _____ |                               | <input type="checkbox"/> <sub>1</sub> | 无临床意义                                 |
|                                                                            |      |                                                                                             |                               | <input type="checkbox"/> <sub>2</sub> | <input type="checkbox"/> <sub>3</sub> |

| TNF- $\alpha$ <input type="checkbox"/> <sub>0</sub> 未查, 原因 _____           |      |                                                                                             |                               |                                       |                                       |
|----------------------------------------------------------------------------|------|---------------------------------------------------------------------------------------------|-------------------------------|---------------------------------------|---------------------------------------|
| 采样日期: <input type="text"/> 年 <input type="text"/> 月 <input type="text"/> 日 |      |                                                                                             | 正常值范围编号: <input type="text"/> |                                       |                                       |
| 检查项目                                                                       | 测量结果 |                                                                                             | 结果判定                          |                                       |                                       |
| TNF- $\alpha$                                                              | 实测值  | 单位                                                                                          | 正常                            | 异常                                    |                                       |
|                                                                            |      | <input type="checkbox"/> <sub>1</sub> pg/mL <input type="checkbox"/> <sub>2</sub> 其他: _____ |                               | <input type="checkbox"/> <sub>1</sub> | 无临床意义                                 |
|                                                                            |      |                                                                                             |                               | <input type="checkbox"/> <sub>2</sub> | <input type="checkbox"/> <sub>3</sub> |

| TNF- $\alpha$ <input type="checkbox"/> <sub>0</sub> 未查, 原因 _____           |      |                                                                                             |                               |                                       |                                       |
|----------------------------------------------------------------------------|------|---------------------------------------------------------------------------------------------|-------------------------------|---------------------------------------|---------------------------------------|
| 采样日期: <input type="text"/> 年 <input type="text"/> 月 <input type="text"/> 日 |      |                                                                                             | 正常值范围编号: <input type="text"/> |                                       |                                       |
| 检查项目                                                                       | 测量结果 |                                                                                             | 结果判定                          |                                       |                                       |
| TNF- $\alpha$                                                              | 实测值  | 单位                                                                                          | 正常                            | 异常                                    |                                       |
|                                                                            |      | <input type="checkbox"/> <sub>1</sub> pg/mL <input type="checkbox"/> <sub>2</sub> 其他: _____ |                               | <input type="checkbox"/> <sub>1</sub> | 无临床意义                                 |
|                                                                            |      |                                                                                             |                               | <input type="checkbox"/> <sub>2</sub> | <input type="checkbox"/> <sub>3</sub> |

| TNF- $\alpha$ <input type="checkbox"/> <sub>0</sub> 未查, 原因 _____           |      |                                                                                             |                               |                                       |                                       |
|----------------------------------------------------------------------------|------|---------------------------------------------------------------------------------------------|-------------------------------|---------------------------------------|---------------------------------------|
| 采样日期: <input type="text"/> 年 <input type="text"/> 月 <input type="text"/> 日 |      |                                                                                             | 正常值范围编号: <input type="text"/> |                                       |                                       |
| 检查项目                                                                       | 测量结果 |                                                                                             | 结果判定                          |                                       |                                       |
| TNF- $\alpha$                                                              | 实测值  | 单位                                                                                          | 正常                            | 异常                                    |                                       |
|                                                                            |      | <input type="checkbox"/> <sub>1</sub> pg/mL <input type="checkbox"/> <sub>2</sub> 其他: _____ |                               | <input type="checkbox"/> <sub>1</sub> | 无临床意义                                 |
|                                                                            |      |                                                                                             |                               | <input type="checkbox"/> <sub>2</sub> | <input type="checkbox"/> <sub>3</sub> |

|                             |          |
|-----------------------------|----------|
| 研究方案编号: KY2020-29           | 附表-计划外检查 |
| 研究中心编号 <input type="text"/> |          |

| IL-6 <input type="checkbox"/> <sub>0</sub> 未查, 原因 <input type="text"/>     |      |                                                                                                            |                               |                                       |                                       |
|----------------------------------------------------------------------------|------|------------------------------------------------------------------------------------------------------------|-------------------------------|---------------------------------------|---------------------------------------|
| 采样日期: <input type="text"/> 年 <input type="text"/> 月 <input type="text"/> 日 |      |                                                                                                            | 正常值范围编号: <input type="text"/> |                                       |                                       |
| 检查项目                                                                       | 测量结果 |                                                                                                            | 结果判定                          |                                       |                                       |
| IL-6                                                                       | 实测值  | 单位                                                                                                         | 正常                            | 异常                                    |                                       |
|                                                                            |      | <input type="checkbox"/> <sub>1</sub> pg/mL <input type="checkbox"/> <sub>2</sub> 其他: <input type="text"/> |                               | <input type="checkbox"/> <sub>1</sub> | 无临床意义                                 |
|                                                                            |      |                                                                                                            |                               | <input type="checkbox"/> <sub>2</sub> | <input type="checkbox"/> <sub>3</sub> |

| IL-6 <input type="checkbox"/> <sub>0</sub> 未查, 原因 <input type="text"/>     |      |                                                                                                            |                               |                                       |                                       |
|----------------------------------------------------------------------------|------|------------------------------------------------------------------------------------------------------------|-------------------------------|---------------------------------------|---------------------------------------|
| 采样日期: <input type="text"/> 年 <input type="text"/> 月 <input type="text"/> 日 |      |                                                                                                            | 正常值范围编号: <input type="text"/> |                                       |                                       |
| 检查项目                                                                       | 测量结果 |                                                                                                            | 结果判定                          |                                       |                                       |
| IL-6                                                                       | 实测值  | 单位                                                                                                         | 正常                            | 异常                                    |                                       |
|                                                                            |      | <input type="checkbox"/> <sub>1</sub> pg/mL <input type="checkbox"/> <sub>2</sub> 其他: <input type="text"/> |                               | <input type="checkbox"/> <sub>1</sub> | 无临床意义                                 |
|                                                                            |      |                                                                                                            |                               | <input type="checkbox"/> <sub>2</sub> | <input type="checkbox"/> <sub>3</sub> |

| IL-6 <input type="checkbox"/> <sub>0</sub> 未查, 原因 <input type="text"/>     |      |                                                                                                            |                               |                                       |                                       |
|----------------------------------------------------------------------------|------|------------------------------------------------------------------------------------------------------------|-------------------------------|---------------------------------------|---------------------------------------|
| 采样日期: <input type="text"/> 年 <input type="text"/> 月 <input type="text"/> 日 |      |                                                                                                            | 正常值范围编号: <input type="text"/> |                                       |                                       |
| 检查项目                                                                       | 测量结果 |                                                                                                            | 结果判定                          |                                       |                                       |
| IL-6                                                                       | 实测值  | 单位                                                                                                         | 正常                            | 异常                                    |                                       |
|                                                                            |      | <input type="checkbox"/> <sub>1</sub> pg/mL <input type="checkbox"/> <sub>2</sub> 其他: <input type="text"/> |                               | <input type="checkbox"/> <sub>1</sub> | 无临床意义                                 |
|                                                                            |      |                                                                                                            |                               | <input type="checkbox"/> <sub>2</sub> | <input type="checkbox"/> <sub>3</sub> |

| IL-6 <input type="checkbox"/> <sub>0</sub> 未查, 原因 <input type="text"/>     |      |                                                                                                            |                               |                                       |                                       |
|----------------------------------------------------------------------------|------|------------------------------------------------------------------------------------------------------------|-------------------------------|---------------------------------------|---------------------------------------|
| 采样日期: <input type="text"/> 年 <input type="text"/> 月 <input type="text"/> 日 |      |                                                                                                            | 正常值范围编号: <input type="text"/> |                                       |                                       |
| 检查项目                                                                       | 测量结果 |                                                                                                            | 结果判定                          |                                       |                                       |
| IL-6                                                                       | 实测值  | 单位                                                                                                         | 正常                            | 异常                                    |                                       |
|                                                                            |      | <input type="checkbox"/> <sub>1</sub> pg/mL <input type="checkbox"/> <sub>2</sub> 其他: <input type="text"/> |                               | <input type="checkbox"/> <sub>1</sub> | 无临床意义                                 |
|                                                                            |      |                                                                                                            |                               | <input type="checkbox"/> <sub>2</sub> | <input type="checkbox"/> <sub>3</sub> |

| IL-6 <input type="checkbox"/> <sub>0</sub> 未查, 原因 <input type="text"/>     |      |                                                                                                            |                               |                                       |                                       |
|----------------------------------------------------------------------------|------|------------------------------------------------------------------------------------------------------------|-------------------------------|---------------------------------------|---------------------------------------|
| 采样日期: <input type="text"/> 年 <input type="text"/> 月 <input type="text"/> 日 |      |                                                                                                            | 正常值范围编号: <input type="text"/> |                                       |                                       |
| 检查项目                                                                       | 测量结果 |                                                                                                            | 结果判定                          |                                       |                                       |
| IL-6                                                                       | 实测值  | 单位                                                                                                         | 正常                            | 异常                                    |                                       |
|                                                                            |      | <input type="checkbox"/> <sub>1</sub> pg/mL <input type="checkbox"/> <sub>2</sub> 其他: <input type="text"/> |                               | <input type="checkbox"/> <sub>1</sub> | 无临床意义                                 |
|                                                                            |      |                                                                                                            |                               | <input type="checkbox"/> <sub>2</sub> | <input type="checkbox"/> <sub>3</sub> |





|                                                                                            |                 |
|--------------------------------------------------------------------------------------------|-----------------|
| 研究方案编号: KY2020-29                                                                          | <b>附表-计划外检查</b> |
| 研究中心编号 <input type="text"/> <input type="text"/> <input type="text"/> <input type="text"/> |                 |

|                                                                                                                                                                                     |
|-------------------------------------------------------------------------------------------------------------------------------------------------------------------------------------|
| <b>12 导联心电图</b> <input type="checkbox"/> <sub>0</sub> 未查, 原因_____                                                                                                                   |
| 检查日期: <input type="text"/> <input type="text"/> <input type="text"/> <input type="text"/> 年 <input type="text"/> <input type="text"/> 月 <input type="text"/> <input type="text"/> 日 |
| 检查结果: <input type="checkbox"/> <sub>1</sub> 正常 <input type="checkbox"/> <sub>2</sub> 异常无临床意义 <input type="checkbox"/> <sub>3</sub> 异常有临床意义                                          |
| 若“异常”, 请描述: _____<br>_____                                                                                                                                                          |

|                                                                                                                                                                                     |
|-------------------------------------------------------------------------------------------------------------------------------------------------------------------------------------|
| <b>12 导联心电图</b> <input type="checkbox"/> <sub>0</sub> 未查, 原因_____                                                                                                                   |
| 检查日期: <input type="text"/> <input type="text"/> <input type="text"/> <input type="text"/> 年 <input type="text"/> <input type="text"/> 月 <input type="text"/> <input type="text"/> 日 |
| 检查结果: <input type="checkbox"/> <sub>1</sub> 正常 <input type="checkbox"/> <sub>2</sub> 异常无临床意义 <input type="checkbox"/> <sub>3</sub> 异常有临床意义                                          |
| 若“异常”, 请描述: _____<br>_____                                                                                                                                                          |

|                                                                                                                                                                                     |
|-------------------------------------------------------------------------------------------------------------------------------------------------------------------------------------|
| <b>12 导联心电图</b> <input type="checkbox"/> <sub>0</sub> 未查, 原因_____                                                                                                                   |
| 检查日期: <input type="text"/> <input type="text"/> <input type="text"/> <input type="text"/> 年 <input type="text"/> <input type="text"/> 月 <input type="text"/> <input type="text"/> 日 |
| 检查结果: <input type="checkbox"/> <sub>1</sub> 正常 <input type="checkbox"/> <sub>2</sub> 异常无临床意义 <input type="checkbox"/> <sub>3</sub> 异常有临床意义                                          |
| 若“异常”, 请描述: _____<br>_____                                                                                                                                                          |

|                                                                                                                                                                                     |
|-------------------------------------------------------------------------------------------------------------------------------------------------------------------------------------|
| <b>12 导联心电图</b> <input type="checkbox"/> <sub>0</sub> 未查, 原因_____                                                                                                                   |
| 检查日期: <input type="text"/> <input type="text"/> <input type="text"/> <input type="text"/> 年 <input type="text"/> <input type="text"/> 月 <input type="text"/> <input type="text"/> 日 |
| 检查结果: <input type="checkbox"/> <sub>1</sub> 正常 <input type="checkbox"/> <sub>2</sub> 异常无临床意义 <input type="checkbox"/> <sub>3</sub> 异常有临床意义                                          |
| 若“异常”, 请描述: _____<br>_____                                                                                                                                                          |

|                                                                                                                                                                                     |
|-------------------------------------------------------------------------------------------------------------------------------------------------------------------------------------|
| <b>12 导联心电图</b> <input type="checkbox"/> <sub>0</sub> 未查, 原因_____                                                                                                                   |
| 检查日期: <input type="text"/> <input type="text"/> <input type="text"/> <input type="text"/> 年 <input type="text"/> <input type="text"/> 月 <input type="text"/> <input type="text"/> 日 |
| 检查结果: <input type="checkbox"/> <sub>1</sub> 正常 <input type="checkbox"/> <sub>2</sub> 异常无临床意义 <input type="checkbox"/> <sub>3</sub> 异常有临床意义                                          |
| 若“异常”, 请描述: _____<br>_____                                                                                                                                                          |

|                                                                                                                                                                                     |
|-------------------------------------------------------------------------------------------------------------------------------------------------------------------------------------|
| <b>12 导联心电图</b> <input type="checkbox"/> <sub>0</sub> 未查, 原因_____                                                                                                                   |
| 检查日期: <input type="text"/> <input type="text"/> <input type="text"/> <input type="text"/> 年 <input type="text"/> <input type="text"/> 月 <input type="text"/> <input type="text"/> 日 |
| 检查结果: <input type="checkbox"/> <sub>1</sub> 正常 <input type="checkbox"/> <sub>2</sub> 异常无临床意义 <input type="checkbox"/> <sub>3</sub> 异常有临床意义                                          |
| 若“异常”, 请描述: _____<br>_____                                                                                                                                                          |

|                             |          |
|-----------------------------|----------|
| 研究方案编号: KY2020-29           | 附表-计划外检查 |
| 研究中心编号 <input type="text"/> |          |

|                                                 |                                                                                                                                                                                                                                                                     |
|-------------------------------------------------|---------------------------------------------------------------------------------------------------------------------------------------------------------------------------------------------------------------------------------------------------------------------|
| 新型冠状病毒核酸检测 <input type="checkbox"/> 未查, 原因_____ |                                                                                                                                                                                                                                                                     |
| 采样部位 (可多选)                                      | <input type="checkbox"/> <sub>0</sub> 上呼吸道 <input type="checkbox"/> <sub>1</sub> 下呼吸道                                                                                                                                                                               |
| 上呼吸道                                            | 采样日期: <input type="text"/> 年 <input type="text"/> 月 <input type="text"/> 日<br>检查结果: <input type="checkbox"/> <sub>1</sub> 阴性 <input type="checkbox"/> <sub>2</sub> 阳性 <input type="checkbox"/> <sub>3</sub> 无法判断 <input type="checkbox"/> <sub>4</sub> 其他, 请描述_____ |
| 下呼吸道                                            | 采样日期: <input type="text"/> 年 <input type="text"/> 月 <input type="text"/> 日<br>检查结果: <input type="checkbox"/> <sub>1</sub> 阴性 <input type="checkbox"/> <sub>2</sub> 阳性 <input type="checkbox"/> <sub>3</sub> 无法判断 <input type="checkbox"/> <sub>4</sub> 其他, 请描述_____ |
| 结果判定                                            | <input type="checkbox"/> <sub>1</sub> 阴性 <input type="checkbox"/> <sub>2</sub> 阳性 <input type="checkbox"/> <sub>3</sub> 无法判断 <input type="checkbox"/> <sub>4</sub> 其他, 请描述_____                                                                                     |

|                                                 |                                                                                                                                                                                                                                                                     |
|-------------------------------------------------|---------------------------------------------------------------------------------------------------------------------------------------------------------------------------------------------------------------------------------------------------------------------|
| 新型冠状病毒核酸检测 <input type="checkbox"/> 未查, 原因_____ |                                                                                                                                                                                                                                                                     |
| 采样部位 (可多选)                                      | <input type="checkbox"/> <sub>0</sub> 上呼吸道 <input type="checkbox"/> <sub>1</sub> 下呼吸道                                                                                                                                                                               |
| 上呼吸道                                            | 采样日期: <input type="text"/> 年 <input type="text"/> 月 <input type="text"/> 日<br>检查结果: <input type="checkbox"/> <sub>1</sub> 阴性 <input type="checkbox"/> <sub>2</sub> 阳性 <input type="checkbox"/> <sub>3</sub> 无法判断 <input type="checkbox"/> <sub>4</sub> 其他, 请描述_____ |
| 下呼吸道                                            | 采样日期: <input type="text"/> 年 <input type="text"/> 月 <input type="text"/> 日<br>检查结果: <input type="checkbox"/> <sub>1</sub> 阴性 <input type="checkbox"/> <sub>2</sub> 阳性 <input type="checkbox"/> <sub>3</sub> 无法判断 <input type="checkbox"/> <sub>4</sub> 其他, 请描述_____ |
| 结果判定                                            | <input type="checkbox"/> <sub>1</sub> 阴性 <input type="checkbox"/> <sub>2</sub> 阳性 <input type="checkbox"/> <sub>3</sub> 无法判断 <input type="checkbox"/> <sub>4</sub> 其他, 请描述_____                                                                                     |

|                                                 |                                                                                                                                                                                                                                                                     |
|-------------------------------------------------|---------------------------------------------------------------------------------------------------------------------------------------------------------------------------------------------------------------------------------------------------------------------|
| 新型冠状病毒核酸检测 <input type="checkbox"/> 未查, 原因_____ |                                                                                                                                                                                                                                                                     |
| 采样部位 (可多选)                                      | <input type="checkbox"/> <sub>0</sub> 上呼吸道 <input type="checkbox"/> <sub>1</sub> 下呼吸道                                                                                                                                                                               |
| 上呼吸道                                            | 采样日期: <input type="text"/> 年 <input type="text"/> 月 <input type="text"/> 日<br>检查结果: <input type="checkbox"/> <sub>1</sub> 阴性 <input type="checkbox"/> <sub>2</sub> 阳性 <input type="checkbox"/> <sub>3</sub> 无法判断 <input type="checkbox"/> <sub>4</sub> 其他, 请描述_____ |
| 下呼吸道                                            | 采样日期: <input type="text"/> 年 <input type="text"/> 月 <input type="text"/> 日<br>检查结果: <input type="checkbox"/> <sub>1</sub> 阴性 <input type="checkbox"/> <sub>2</sub> 阳性 <input type="checkbox"/> <sub>3</sub> 无法判断 <input type="checkbox"/> <sub>4</sub> 其他, 请描述_____ |
| 结果判定                                            | <input type="checkbox"/> <sub>1</sub> 阴性 <input type="checkbox"/> <sub>2</sub> 阳性 <input type="checkbox"/> <sub>3</sub> 无法判断 <input type="checkbox"/> <sub>4</sub> 其他, 请描述_____                                                                                     |

|                                                 |                                                                                                                                                                                                                                                                     |
|-------------------------------------------------|---------------------------------------------------------------------------------------------------------------------------------------------------------------------------------------------------------------------------------------------------------------------|
| 新型冠状病毒核酸检测 <input type="checkbox"/> 未查, 原因_____ |                                                                                                                                                                                                                                                                     |
| 采样部位 (可多选)                                      | <input type="checkbox"/> <sub>0</sub> 上呼吸道 <input type="checkbox"/> <sub>1</sub> 下呼吸道                                                                                                                                                                               |
| 上呼吸道                                            | 采样日期: <input type="text"/> 年 <input type="text"/> 月 <input type="text"/> 日<br>检查结果: <input type="checkbox"/> <sub>1</sub> 阴性 <input type="checkbox"/> <sub>2</sub> 阳性 <input type="checkbox"/> <sub>3</sub> 无法判断 <input type="checkbox"/> <sub>4</sub> 其他, 请描述_____ |
| 下呼吸道                                            | 采样日期: <input type="text"/> 年 <input type="text"/> 月 <input type="text"/> 日<br>检查结果: <input type="checkbox"/> <sub>1</sub> 阴性 <input type="checkbox"/> <sub>2</sub> 阳性 <input type="checkbox"/> <sub>3</sub> 无法判断 <input type="checkbox"/> <sub>4</sub> 其他, 请描述_____ |
| 结果判定                                            | <input type="checkbox"/> <sub>1</sub> 阴性 <input type="checkbox"/> <sub>2</sub> 阳性 <input type="checkbox"/> <sub>3</sub> 无法判断 <input type="checkbox"/> <sub>4</sub> 其他, 请描述_____                                                                                     |

|                                                                                                                                      |                 |
|--------------------------------------------------------------------------------------------------------------------------------------|-----------------|
| 研究方案编号: KY2020-29                                                                                                                    | <b>附表-计划外检查</b> |
| 研究中心编号 <input type="text"/> <input type="text"/> <input type="text"/> <input type="text"/> <input type="text"/> <input type="text"/> |                 |

|                                                                                                                                                                                     |
|-------------------------------------------------------------------------------------------------------------------------------------------------------------------------------------|
| <b>指脉氧饱和度</b> （不吸氧情况下） <input type="checkbox"/> 未查，原因_____                                                                                                                          |
| 检查日期: <input type="text"/> <input type="text"/> <input type="text"/> <input type="text"/> 年 <input type="text"/> <input type="text"/> 月 <input type="text"/> <input type="text"/> 日 |
| 实测值: _____ %（静息状态）                                                                                                                                                                  |

|                                                                                                                                                                                     |
|-------------------------------------------------------------------------------------------------------------------------------------------------------------------------------------|
| <b>指脉氧饱和度</b> （不吸氧情况下） <input type="checkbox"/> 未查，原因_____                                                                                                                          |
| 检查日期: <input type="text"/> <input type="text"/> <input type="text"/> <input type="text"/> 年 <input type="text"/> <input type="text"/> 月 <input type="text"/> <input type="text"/> 日 |
| 实测值: _____ %（静息状态）                                                                                                                                                                  |

|                                                                                                                                                                                     |
|-------------------------------------------------------------------------------------------------------------------------------------------------------------------------------------|
| <b>指脉氧饱和度</b> （不吸氧情况下） <input type="checkbox"/> 未查，原因_____                                                                                                                          |
| 检查日期: <input type="text"/> <input type="text"/> <input type="text"/> <input type="text"/> 年 <input type="text"/> <input type="text"/> 月 <input type="text"/> <input type="text"/> 日 |
| 实测值: _____ %（静息状态）                                                                                                                                                                  |

|                                                                                                                                                                                     |
|-------------------------------------------------------------------------------------------------------------------------------------------------------------------------------------|
| <b>指脉氧饱和度</b> （不吸氧情况下） <input type="checkbox"/> 未查，原因_____                                                                                                                          |
| 检查日期: <input type="text"/> <input type="text"/> <input type="text"/> <input type="text"/> 年 <input type="text"/> <input type="text"/> 月 <input type="text"/> <input type="text"/> 日 |
| 实测值: _____ %（静息状态）                                                                                                                                                                  |

|                                                                                                                                                                                     |
|-------------------------------------------------------------------------------------------------------------------------------------------------------------------------------------|
| <b>指脉氧饱和度</b> （不吸氧情况下） <input type="checkbox"/> 未查，原因_____                                                                                                                          |
| 检查日期: <input type="text"/> <input type="text"/> <input type="text"/> <input type="text"/> 年 <input type="text"/> <input type="text"/> 月 <input type="text"/> <input type="text"/> 日 |
| 实测值: _____ %（静息状态）                                                                                                                                                                  |

|                                                                                                                                                                                     |
|-------------------------------------------------------------------------------------------------------------------------------------------------------------------------------------|
| <b>指脉氧饱和度</b> （不吸氧情况下） <input type="checkbox"/> 未查，原因_____                                                                                                                          |
| 检查日期: <input type="text"/> <input type="text"/> <input type="text"/> <input type="text"/> 年 <input type="text"/> <input type="text"/> 月 <input type="text"/> <input type="text"/> 日 |
| 实测值: _____ %（静息状态）                                                                                                                                                                  |

|                                                                                                                                                                                     |
|-------------------------------------------------------------------------------------------------------------------------------------------------------------------------------------|
| <b>指脉氧饱和度</b> （不吸氧情况下） <input type="checkbox"/> 未查，原因_____                                                                                                                          |
| 检查日期: <input type="text"/> <input type="text"/> <input type="text"/> <input type="text"/> 年 <input type="text"/> <input type="text"/> 月 <input type="text"/> <input type="text"/> 日 |
| 实测值: _____ %（静息状态）                                                                                                                                                                  |

|                             |          |
|-----------------------------|----------|
| 研究方案编号: KY2020-29           | 附表-计划外检查 |
| 研究中心编号 <input type="text"/> |          |

|               |                                                                      |                                   |                                                                      |
|---------------|----------------------------------------------------------------------|-----------------------------------|----------------------------------------------------------------------|
| 是否转成重型/危重型肺炎  | <input type="checkbox"/> 未评价                                         | 评价日期                              | <input type="text"/> 年 <input type="text"/> 月 <input type="text"/> 日 |
| 是否转成重型/危重型肺炎: | <input type="checkbox"/> 否                                           | <input type="checkbox"/> 是, 临床分型: | <input type="checkbox"/> 重型 <input type="checkbox"/> 危重型             |
| 转成重型/危重型肺炎日期: | <input type="text"/> 年 <input type="text"/> 月 <input type="text"/> 日 |                                   |                                                                      |

|               |                                                                      |                                   |                                                                      |
|---------------|----------------------------------------------------------------------|-----------------------------------|----------------------------------------------------------------------|
| 是否转成重型/危重型肺炎  | <input type="checkbox"/> 未评价                                         | 评价日期                              | <input type="text"/> 年 <input type="text"/> 月 <input type="text"/> 日 |
| 是否转成重型/危重型肺炎: | <input type="checkbox"/> 否                                           | <input type="checkbox"/> 是, 临床分型: | <input type="checkbox"/> 重型 <input type="checkbox"/> 危重型             |
| 转成重型/危重型肺炎日期: | <input type="text"/> 年 <input type="text"/> 月 <input type="text"/> 日 |                                   |                                                                      |

|               |                                                                      |                                   |                                                                      |
|---------------|----------------------------------------------------------------------|-----------------------------------|----------------------------------------------------------------------|
| 是否转成重型/危重型肺炎  | <input type="checkbox"/> 未评价                                         | 评价日期                              | <input type="text"/> 年 <input type="text"/> 月 <input type="text"/> 日 |
| 是否转成重型/危重型肺炎: | <input type="checkbox"/> 否                                           | <input type="checkbox"/> 是, 临床分型: | <input type="checkbox"/> 重型 <input type="checkbox"/> 危重型             |
| 转成重型/危重型肺炎日期: | <input type="text"/> 年 <input type="text"/> 月 <input type="text"/> 日 |                                   |                                                                      |

|               |                                                                      |                                   |                                                                      |
|---------------|----------------------------------------------------------------------|-----------------------------------|----------------------------------------------------------------------|
| 是否转成重型/危重型肺炎  | <input type="checkbox"/> 未评价                                         | 评价日期                              | <input type="text"/> 年 <input type="text"/> 月 <input type="text"/> 日 |
| 是否转成重型/危重型肺炎: | <input type="checkbox"/> 否                                           | <input type="checkbox"/> 是, 临床分型: | <input type="checkbox"/> 重型 <input type="checkbox"/> 危重型             |
| 转成重型/危重型肺炎日期: | <input type="text"/> 年 <input type="text"/> 月 <input type="text"/> 日 |                                   |                                                                      |

|               |                                                                      |                                   |                                                                      |
|---------------|----------------------------------------------------------------------|-----------------------------------|----------------------------------------------------------------------|
| 是否转成重型/危重型肺炎  | <input type="checkbox"/> 未评价                                         | 评价日期                              | <input type="text"/> 年 <input type="text"/> 月 <input type="text"/> 日 |
| 是否转成重型/危重型肺炎: | <input type="checkbox"/> 否                                           | <input type="checkbox"/> 是, 临床分型: | <input type="checkbox"/> 重型 <input type="checkbox"/> 危重型             |
| 转成重型/危重型肺炎日期: | <input type="text"/> 年 <input type="text"/> 月 <input type="text"/> 日 |                                   |                                                                      |

|               |                                                                      |                                   |                                                                      |
|---------------|----------------------------------------------------------------------|-----------------------------------|----------------------------------------------------------------------|
| 是否转成重型/危重型肺炎  | <input type="checkbox"/> 未评价                                         | 评价日期                              | <input type="text"/> 年 <input type="text"/> 月 <input type="text"/> 日 |
| 是否转成重型/危重型肺炎: | <input type="checkbox"/> 否                                           | <input type="checkbox"/> 是, 临床分型: | <input type="checkbox"/> 重型 <input type="checkbox"/> 危重型             |
| 转成重型/危重型肺炎日期: | <input type="text"/> 年 <input type="text"/> 月 <input type="text"/> 日 |                                   |                                                                      |

|               |                                                                      |                                   |                                                                      |
|---------------|----------------------------------------------------------------------|-----------------------------------|----------------------------------------------------------------------|
| 是否转成重型/危重型肺炎  | <input type="checkbox"/> 未评价                                         | 评价日期                              | <input type="text"/> 年 <input type="text"/> 月 <input type="text"/> 日 |
| 是否转成重型/危重型肺炎: | <input type="checkbox"/> 否                                           | <input type="checkbox"/> 是, 临床分型: | <input type="checkbox"/> 重型 <input type="checkbox"/> 危重型             |
| 转成重型/危重型肺炎日期: | <input type="text"/> 年 <input type="text"/> 月 <input type="text"/> 日 |                                   |                                                                      |

|               |                                                                      |                                   |                                                                      |
|---------------|----------------------------------------------------------------------|-----------------------------------|----------------------------------------------------------------------|
| 是否转成重型/危重型肺炎  | <input type="checkbox"/> 未评价                                         | 评价日期                              | <input type="text"/> 年 <input type="text"/> 月 <input type="text"/> 日 |
| 是否转成重型/危重型肺炎: | <input type="checkbox"/> 否                                           | <input type="checkbox"/> 是, 临床分型: | <input type="checkbox"/> 重型 <input type="checkbox"/> 危重型             |
| 转成重型/危重型肺炎日期: | <input type="text"/> 年 <input type="text"/> 月 <input type="text"/> 日 |                                   |                                                                      |



|                             |          |
|-----------------------------|----------|
| 研究方案编号: KY2020-29           | 附表-计划外检查 |
| 研究中心编号 <input type="text"/> |          |

动脉血气分析 未查, 原因\_\_\_\_\_

是否吸氧: 否 是, 吸氧浓度 (FiO2): \_\_\_\_\_%

采样日期: 年月日 正常值范围编号:

| 检查项目          | 测量结果 |                                                                      | 结果判定                       |                            |                            | 未查                         |
|---------------|------|----------------------------------------------------------------------|----------------------------|----------------------------|----------------------------|----------------------------|
|               | 实测值  | 单位                                                                   | 正常                         | 异常                         |                            |                            |
|               |      |                                                                      |                            | 无临床意义                      | 有临床意义                      |                            |
| 动脉血氧分压 (PaO2) |      | <input type="checkbox"/> 1 mmHg <input type="checkbox"/> 2 其他: _____ | <input type="checkbox"/> 1 | <input type="checkbox"/> 2 | <input type="checkbox"/> 3 | <input type="checkbox"/> 0 |
| 血氧饱和度 (SaO2)  |      | <input type="checkbox"/> 1 % <input type="checkbox"/> 2 其他: _____    | <input type="checkbox"/> 1 | <input type="checkbox"/> 2 | <input type="checkbox"/> 3 | <input type="checkbox"/> 0 |

动脉血气分析 未查, 原因\_\_\_\_\_

是否吸氧: 否 是, 吸氧浓度 (FiO2): \_\_\_\_\_%

采样日期: 年月日 正常值范围编号:

| 检查项目          | 测量结果 |                                                                      | 结果判定                       |                            |                            | 未查                         |
|---------------|------|----------------------------------------------------------------------|----------------------------|----------------------------|----------------------------|----------------------------|
|               | 实测值  | 单位                                                                   | 正常                         | 异常                         |                            |                            |
|               |      |                                                                      |                            | 无临床意义                      | 有临床意义                      |                            |
| 动脉血氧分压 (PaO2) |      | <input type="checkbox"/> 1 mmHg <input type="checkbox"/> 2 其他: _____ | <input type="checkbox"/> 1 | <input type="checkbox"/> 2 | <input type="checkbox"/> 3 | <input type="checkbox"/> 0 |
| 血氧饱和度 (SaO2)  |      | <input type="checkbox"/> 1 % <input type="checkbox"/> 2 其他: _____    | <input type="checkbox"/> 1 | <input type="checkbox"/> 2 | <input type="checkbox"/> 3 | <input type="checkbox"/> 0 |

动脉血气分析 未查, 原因\_\_\_\_\_

是否吸氧: 否 是, 吸氧浓度 (FiO2): \_\_\_\_\_%

采样日期: 年月日 正常值范围编号:

| 检查项目          | 测量结果 |                                                                      | 结果判定                       |                            |                            | 未查                         |
|---------------|------|----------------------------------------------------------------------|----------------------------|----------------------------|----------------------------|----------------------------|
|               | 实测值  | 单位                                                                   | 正常                         | 异常                         |                            |                            |
|               |      |                                                                      |                            | 无临床意义                      | 有临床意义                      |                            |
| 动脉血氧分压 (PaO2) |      | <input type="checkbox"/> 1 mmHg <input type="checkbox"/> 2 其他: _____ | <input type="checkbox"/> 1 | <input type="checkbox"/> 2 | <input type="checkbox"/> 3 | <input type="checkbox"/> 0 |
| 血氧饱和度 (SaO2)  |      | <input type="checkbox"/> 1 % <input type="checkbox"/> 2 其他: _____    | <input type="checkbox"/> 1 | <input type="checkbox"/> 2 | <input type="checkbox"/> 3 | <input type="checkbox"/> 0 |

|                             |          |
|-----------------------------|----------|
| 研究方案编号: KY2020-29           | 附表-计划外检查 |
| 研究中心编号 <input type="text"/> |          |

|                                                          |                                                                                                                                                                                                                                                                                                                                                                                              |
|----------------------------------------------------------|----------------------------------------------------------------------------------------------------------------------------------------------------------------------------------------------------------------------------------------------------------------------------------------------------------------------------------------------------------------------------------------------|
| 临床状态 <input type="checkbox"/> <sub>0</sub> 未评价, 原因 _____ |                                                                                                                                                                                                                                                                                                                                                                                              |
| 评价日期                                                     | <input type="text"/> 年 <input type="text"/> 月 <input type="text"/> 日                                                                                                                                                                                                                                                                                                                         |
| 评价结果                                                     | <input type="checkbox"/> <sub>1</sub> 1级: 出院<br><input type="checkbox"/> <sub>2</sub> 2级: 住院, 不需要氧疗<br><input type="checkbox"/> <sub>3</sub> 3级: 住院, 需要氧疗 (非NIV/HFNC)<br><input type="checkbox"/> <sub>4</sub> 4级: ICU/住院, 需要无创机械通气 (NIV) /高流量鼻导管氧疗 (HFNC)<br><input type="checkbox"/> <sub>5</sub> 5级: ICU, 需要体外膜肺氧合 (ECMO) 和/或有创机械通气 (IMV)<br><input type="checkbox"/> <sub>6</sub> 6级: 死亡 |

|                                                          |                                                                                                                                                                                                                                                                                                                                                                                              |
|----------------------------------------------------------|----------------------------------------------------------------------------------------------------------------------------------------------------------------------------------------------------------------------------------------------------------------------------------------------------------------------------------------------------------------------------------------------|
| 临床状态 <input type="checkbox"/> <sub>0</sub> 未评价, 原因 _____ |                                                                                                                                                                                                                                                                                                                                                                                              |
| 评价日期                                                     | <input type="text"/> 年 <input type="text"/> 月 <input type="text"/> 日                                                                                                                                                                                                                                                                                                                         |
| 评价结果                                                     | <input type="checkbox"/> <sub>1</sub> 1级: 出院<br><input type="checkbox"/> <sub>2</sub> 2级: 住院, 不需要氧疗<br><input type="checkbox"/> <sub>3</sub> 3级: 住院, 需要氧疗 (非NIV/HFNC)<br><input type="checkbox"/> <sub>4</sub> 4级: ICU/住院, 需要无创机械通气 (NIV) /高流量鼻导管氧疗 (HFNC)<br><input type="checkbox"/> <sub>5</sub> 5级: ICU, 需要体外膜肺氧合 (ECMO) 和/或有创机械通气 (IMV)<br><input type="checkbox"/> <sub>6</sub> 6级: 死亡 |

|                                                          |                                                                                                                                                                                                                                                                                                                                                                                              |
|----------------------------------------------------------|----------------------------------------------------------------------------------------------------------------------------------------------------------------------------------------------------------------------------------------------------------------------------------------------------------------------------------------------------------------------------------------------|
| 临床状态 <input type="checkbox"/> <sub>0</sub> 未评价, 原因 _____ |                                                                                                                                                                                                                                                                                                                                                                                              |
| 评价日期                                                     | <input type="text"/> 年 <input type="text"/> 月 <input type="text"/> 日                                                                                                                                                                                                                                                                                                                         |
| 评价结果                                                     | <input type="checkbox"/> <sub>1</sub> 1级: 出院<br><input type="checkbox"/> <sub>2</sub> 2级: 住院, 不需要氧疗<br><input type="checkbox"/> <sub>3</sub> 3级: 住院, 需要氧疗 (非NIV/HFNC)<br><input type="checkbox"/> <sub>4</sub> 4级: ICU/住院, 需要无创机械通气 (NIV) /高流量鼻导管氧疗 (HFNC)<br><input type="checkbox"/> <sub>5</sub> 5级: ICU, 需要体外膜肺氧合 (ECMO) 和/或有创机械通气 (IMV)<br><input type="checkbox"/> <sub>6</sub> 6级: 死亡 |

|                                                          |                                                                                                                                                                                                                                                                                                                                                                                              |
|----------------------------------------------------------|----------------------------------------------------------------------------------------------------------------------------------------------------------------------------------------------------------------------------------------------------------------------------------------------------------------------------------------------------------------------------------------------|
| 临床状态 <input type="checkbox"/> <sub>0</sub> 未评价, 原因 _____ |                                                                                                                                                                                                                                                                                                                                                                                              |
| 评价日期                                                     | <input type="text"/> 年 <input type="text"/> 月 <input type="text"/> 日                                                                                                                                                                                                                                                                                                                         |
| 评价结果                                                     | <input type="checkbox"/> <sub>1</sub> 1级: 出院<br><input type="checkbox"/> <sub>2</sub> 2级: 住院, 不需要氧疗<br><input type="checkbox"/> <sub>3</sub> 3级: 住院, 需要氧疗 (非NIV/HFNC)<br><input type="checkbox"/> <sub>4</sub> 4级: ICU/住院, 需要无创机械通气 (NIV) /高流量鼻导管氧疗 (HFNC)<br><input type="checkbox"/> <sub>5</sub> 5级: ICU, 需要体外膜肺氧合 (ECMO) 和/或有创机械通气 (IMV)<br><input type="checkbox"/> <sub>6</sub> 6级: 死亡 |



|                                                  |                 |
|--------------------------------------------------|-----------------|
| 研究方案编号: KY2020-29                                | <b>附表-计划外检查</b> |
| 研究中心编号 <input type="text"/> <input type="text"/> |                 |

|                 |                                                                      |
|-----------------|----------------------------------------------------------------------|
| <b>签署知情同意书</b>  |                                                                      |
| 签署知情同意书日期       | <input type="text"/> 年 <input type="text"/> 月 <input type="text"/> 日 |
| 知情同意书版本号        | <input type="text"/>                                                 |
| 签署知情同意书时适用方案版本号 | <input type="text"/> . <input type="text"/>                          |

|                 |                                                                      |
|-----------------|----------------------------------------------------------------------|
| <b>签署知情同意书</b>  |                                                                      |
| 签署知情同意书日期       | <input type="text"/> 年 <input type="text"/> 月 <input type="text"/> 日 |
| 知情同意书版本号        | <input type="text"/>                                                 |
| 签署知情同意书时适用方案版本号 | <input type="text"/> . <input type="text"/>                          |

|                 |                                                                      |
|-----------------|----------------------------------------------------------------------|
| <b>签署知情同意书</b>  |                                                                      |
| 签署知情同意书日期       | <input type="text"/> 年 <input type="text"/> 月 <input type="text"/> 日 |
| 知情同意书版本号        | <input type="text"/>                                                 |
| 签署知情同意书时适用方案版本号 | <input type="text"/> . <input type="text"/>                          |

|                 |                                                                      |
|-----------------|----------------------------------------------------------------------|
| <b>签署知情同意书</b>  |                                                                      |
| 签署知情同意书日期       | <input type="text"/> 年 <input type="text"/> 月 <input type="text"/> 日 |
| 知情同意书版本号        | <input type="text"/>                                                 |
| 签署知情同意书时适用方案版本号 | <input type="text"/> . <input type="text"/>                          |

|                 |                                                                      |
|-----------------|----------------------------------------------------------------------|
| <b>签署知情同意书</b>  |                                                                      |
| 签署知情同意书日期       | <input type="text"/> 年 <input type="text"/> 月 <input type="text"/> 日 |
| 知情同意书版本号        | <input type="text"/>                                                 |
| 签署知情同意书时适用方案版本号 | <input type="text"/> . <input type="text"/>                          |

# 硫酸羟氯喹治疗新型冠状病毒肺炎的一项随机、对照、开放的多中心研究

## 病例报告表

### (Case Report Form)

中心编号:

受试者筛选号:

受试者姓名缩写:

研究中心名称 (正楷): \_\_\_\_\_

研究医生姓名 (正楷): \_\_\_\_\_

版本号及日期: 3.0 版/2020 年 2 月 25 日

适用临床分型: 重型

#### 保密声明

本文件包含的相关信息涉及商业机密和商业信息, 这些商业信息术语保密内容或专有信息, 若非法规范要求, 任何人不得擅自公开这些保密内容。任何接触到该文件的个人应当了解文件的专有性或机密性, 并不得擅自公开文件。以上文件保密方面的限制条款将适用于未来提供给你的任何注明具有专有性或机密性的资料。

## 填表指南

1. 病例报告表须由授权人员负责观察记录，并对CRF中的每一页认真检查并签字。
2. 试验医师应熟悉试验方案，并掌握GCP原则。
3. 请用蓝色或黑色签字笔填写，字迹应清晰，易于辨认，英文最好用大写字母，例如：**CASE REPORT FORM**。
4. 在开放的方格中填写数字时，每一格填写一个数字；如果数字位数少于相应的格子数时请以零填充，不可出现空格。例如：**56Kg**，填入空格中为：|0|5|6|·|0|0|Kg。
5. 日期采用国际ISO8601日期格式：yyymmdd。例如2007年12月21日写成|2|0|0|7|年|1|2|月|2|1|日。
6. 表中凡有“□”的项目，请在符合的方框内打“×”，或填写相关数字，如果未做或数据无法获得，请在相应空格上填写ND（未完成）或NK（无法获知）；不适用填写NA。
7. 每项填写内容务必准确，不得随便涂改，禁止使用涂改液或以其他方式掩盖原始数据。如发现填写内容有误，请用单横线划去错误的记录，使原有记录仍可辨认，在右上方填写正确记录，并注明修改者的姓名缩写及修改日期。如：~~-58.6~~<sup>56.8 ZH 2007-12-21</sup>。
8. 患者姓名拼音缩写四格应填满，两字姓名按每个字前两个字母填写，三字姓名按三字的首字母和第三个字的第二个字母填写；四字姓名填写每一个字的首字母。每位患者姓名的拼音缩写应在其CRF中统一。举例：张红|Z|H|H|0|，李淑明|L|S|M|I|，欧阳小惠|O|Y|X|H|。
9. 不要改变病例报告表的格式，如发现表中没有填写位置填写记录者希望记录的资料时，请联系负责的CRA。
10. 病例报告表填写完成后，主要研究者应检查病例报告表的每一页记录，并在病例报告表的研究者声明处签字。

|                   |                  |
|-------------------|------------------|
| 研究方案编号: KY2020-29 | 筛选期/治疗期          |
| 研究中心编号  __        | 受试者筛选号  __ __ __ |
|                   | 访视 1 (D-3~1)     |

本次访视日期: |\_\_|\_\_|\_\_|年|\_\_|\_\_|月|\_\_|\_\_|日

| 签署知情同意书         |                                                             |
|-----------------|-------------------------------------------------------------|
| 是否签署知情同意书       | <input type="checkbox"/> _0 否 <input type="checkbox"/> _1 是 |
| 签署知情同意书日期       | __ __ __ 年 __ __ 月 __ __ 日                                  |
| 知情同意书版本号        | _____                                                       |
| 签署知情同意书时适用方案版本号 | __ __ . __                                                  |

| 确认入选/排除标准                                                                                  |                                                                                                                                                                                                                                                                                                        |
|--------------------------------------------------------------------------------------------|--------------------------------------------------------------------------------------------------------------------------------------------------------------------------------------------------------------------------------------------------------------------------------------------------------|
| 受试者是否满足所有入选标准且不满足所有排除标准? <input type="checkbox"/> _1 是 <input type="checkbox"/> _0 否, 请填写。 |                                                                                                                                                                                                                                                                                                        |
| <input type="checkbox"/> _1 不满足入选标准, 入选标准编号 (可多选)                                          | <input type="checkbox"/> _1 <input type="checkbox"/> _2 <input type="checkbox"/> _3 <input type="checkbox"/> _4 <input type="checkbox"/> _5 <input type="checkbox"/> _6 <input type="checkbox"/> _7<br><input type="checkbox"/> 其他, 请描述: _____                                                         |
| <input type="checkbox"/> _2 满足排除标准, 排除标准编号 (可多选)                                           | <input type="checkbox"/> _1 <input type="checkbox"/> _2 <input type="checkbox"/> _3 <input type="checkbox"/> _4 <input type="checkbox"/> _5 <input type="checkbox"/> _6 <input type="checkbox"/> _7<br><input type="checkbox"/> _8 <input type="checkbox"/> _9 <input type="checkbox"/> 其他, 请描述: _____ |

| 人口学资料   |                                                                          |
|---------|--------------------------------------------------------------------------|
| 性 别     | <input type="checkbox"/> _1 男 <input type="checkbox"/> _2 女              |
| 出 生 日 期 | __ __ __ 年 __ __ 月 __ __ 日    如不能获得, 请填写年龄:  __ __  岁                    |
| 民 族     | <input type="checkbox"/> _1 汉 <input type="checkbox"/> _2 其他, 请描述: _____ |

| 新型冠状病毒肺炎病史         |                                                                                                                                                               |
|--------------------|---------------------------------------------------------------------------------------------------------------------------------------------------------------|
| 首次发病日期             | __ __ __ 年 __ __ 月 __ __ 日                                                                                                                                    |
| 发病前 14 天内有无相关病源接触史 | <input type="checkbox"/> _0 无 <input type="checkbox"/> _1 有 <input type="checkbox"/> _2 未知                                                                    |
| 接触类型 (可多选)         | <input type="checkbox"/> _1 接触湖北地区<br><input type="checkbox"/> _2 接触新型冠状病毒感染者<br><input type="checkbox"/> _3 未知<br><input type="checkbox"/> _4 其他, 请描述: _____ |
| 既往有无进行抗新型冠状病毒肺炎治疗  | <input type="checkbox"/> _0 无 <input type="checkbox"/> _1 有                                                                                                   |
| 首次核酸检测阳性报告日期       | __ __ __ 年 __ __ 月 __ __ 日                                                                                                                                    |
| 入组时临床分型            | <input type="checkbox"/> _1 轻型 <input type="checkbox"/> _2 普通型 <input type="checkbox"/> _3 重型 <input type="checkbox"/> _4 危重型                                 |

|                   |              |
|-------------------|--------------|
| 研究方案编号: KY2020-29 | 筛选期/治疗期      |
| 研究中心编号  __        | 受试者筛选号  __   |
|                   | 访视 1 (D-3~1) |

注: 如进行抗新型冠状病毒肺炎治疗, 请在“既往/合并药物治疗”和“既往/合并非药物治疗”表中填写。

### 药物过敏史

受试者有无药物过敏史?

无  有, 请描述: \_\_\_\_\_

### 既往/伴随疾病

受试者是否有除新型冠状病毒肺炎之外的既往/伴随疾病?  否  是, 请填写下表。

| 编号 | 疾病名称 | 确诊日期               | 目前是否持续?                                                  | 结束日期               | 是否接受治疗                                                   |
|----|------|--------------------|----------------------------------------------------------|--------------------|----------------------------------------------------------|
| 1  |      | __ 年<br> __ 月 __ 日 | <input type="checkbox"/> 否<br><input type="checkbox"/> 是 | __ 年<br> __ 月 __ 日 | <input type="checkbox"/> 否<br><input type="checkbox"/> 是 |
| 2  |      | __ 年<br> __ 月 __ 日 | <input type="checkbox"/> 否<br><input type="checkbox"/> 是 | __ 年<br> __ 月 __ 日 | <input type="checkbox"/> 否<br><input type="checkbox"/> 是 |
| 3  |      | __ 年<br> __ 月 __ 日 | <input type="checkbox"/> 否<br><input type="checkbox"/> 是 | __ 年<br> __ 月 __ 日 | <input type="checkbox"/> 否<br><input type="checkbox"/> 是 |
| 4  |      | __ 年<br> __ 月 __ 日 | <input type="checkbox"/> 否<br><input type="checkbox"/> 是 | __ 年<br> __ 月 __ 日 | <input type="checkbox"/> 否<br><input type="checkbox"/> 是 |
| 5  |      | __ 年<br> __ 月 __ 日 | <input type="checkbox"/> 否<br><input type="checkbox"/> 是 | __ 年<br> __ 月 __ 日 | <input type="checkbox"/> 否<br><input type="checkbox"/> 是 |
| 6  |      | __ 年<br> __ 月 __ 日 | <input type="checkbox"/> 否<br><input type="checkbox"/> 是 | __ 年<br> __ 月 __ 日 | <input type="checkbox"/> 否<br><input type="checkbox"/> 是 |
| 7  |      | __ 年<br> __ 月 __ 日 | <input type="checkbox"/> 否<br><input type="checkbox"/> 是 | __ 年<br> __ 月 __ 日 | <input type="checkbox"/> 否<br><input type="checkbox"/> 是 |
| 8  |      | __ 年<br> __ 月 __ 日 | <input type="checkbox"/> 否<br><input type="checkbox"/> 是 | __ 年<br> __ 月 __ 日 | <input type="checkbox"/> 否<br><input type="checkbox"/> 是 |
| 9  |      | __ 年<br> __ 月 __ 日 | <input type="checkbox"/> 否<br><input type="checkbox"/> 是 | __ 年<br> __ 月 __ 日 | <input type="checkbox"/> 否<br><input type="checkbox"/> 是 |
| 10 |      | __ 年<br> __ 月 __ 日 | <input type="checkbox"/> 否<br><input type="checkbox"/> 是 | __ 年<br> __ 月 __ 日 | <input type="checkbox"/> 否<br><input type="checkbox"/> 是 |

### 生命体征

未查, 原因 \_\_\_\_\_

|       |                |      |                                                                                                                                                                                       |
|-------|----------------|------|---------------------------------------------------------------------------------------------------------------------------------------------------------------------------------------|
| 检查日期  | __ 年 __ 月 __ 日 |      |                                                                                                                                                                                       |
| 日最高体温 | __ . __ °C     | 测量方式 | <input type="checkbox"/> 腋下 <input type="checkbox"/> 口腔 <input type="checkbox"/> 肛门<br><input type="checkbox"/> 耳朵 <input type="checkbox"/> 未知 <input type="checkbox"/> 其他, 请描述 _____ |
| 呼吸频率  | __ 次/分         | 脉搏   | __ 次/分                                                                                                                                                                                |

|                   |                  |
|-------------------|------------------|
| 研究方案编号: KY2020-29 | 筛选期/治疗期          |
| 研究中心编号  __        | 受试者筛选号  __ __ __ |
|                   | 访视 1 (D-3~1)     |

|    |                                     |
|----|-------------------------------------|
| 血压 | __ __ __ / __ __ __  mmHg (收缩压/舒张压) |
|----|-------------------------------------|

**体格检查**      <sub>0</sub> 未查, 原因 \_\_\_\_\_

检查日期: |\_\_|\_\_|\_\_|年|\_\_|\_\_|月|\_\_|\_\_|日

| 检查部位   | 检查结果                                  |                                       |                                       |                                       | 异常请描述 |
|--------|---------------------------------------|---------------------------------------|---------------------------------------|---------------------------------------|-------|
|        | 1=正常                                  | 2=异常无临床意义                             | 3=异常有临床意义                             | 0=未查                                  |       |
| 整体外观   | <input type="checkbox"/> <sub>1</sub> | <input type="checkbox"/> <sub>2</sub> | <input type="checkbox"/> <sub>3</sub> | <input type="checkbox"/> <sub>0</sub> |       |
| 头      | <input type="checkbox"/> <sub>1</sub> | <input type="checkbox"/> <sub>2</sub> | <input type="checkbox"/> <sub>3</sub> | <input type="checkbox"/> <sub>0</sub> |       |
| 眼      | <input type="checkbox"/> <sub>1</sub> | <input type="checkbox"/> <sub>2</sub> | <input type="checkbox"/> <sub>3</sub> | <input type="checkbox"/> <sub>0</sub> |       |
| 耳      | <input type="checkbox"/> <sub>1</sub> | <input type="checkbox"/> <sub>2</sub> | <input type="checkbox"/> <sub>3</sub> | <input type="checkbox"/> <sub>0</sub> |       |
| 鼻      | <input type="checkbox"/> <sub>1</sub> | <input type="checkbox"/> <sub>2</sub> | <input type="checkbox"/> <sub>3</sub> | <input type="checkbox"/> <sub>0</sub> |       |
| 喉      | <input type="checkbox"/> <sub>1</sub> | <input type="checkbox"/> <sub>2</sub> | <input type="checkbox"/> <sub>3</sub> | <input type="checkbox"/> <sub>0</sub> |       |
| 颈部及甲状腺 | <input type="checkbox"/> <sub>1</sub> | <input type="checkbox"/> <sub>2</sub> | <input type="checkbox"/> <sub>3</sub> | <input type="checkbox"/> <sub>0</sub> |       |
| 皮肤     | <input type="checkbox"/> <sub>1</sub> | <input type="checkbox"/> <sub>2</sub> | <input type="checkbox"/> <sub>3</sub> | <input type="checkbox"/> <sub>0</sub> |       |
| 心血管系统  | <input type="checkbox"/> <sub>1</sub> | <input type="checkbox"/> <sub>2</sub> | <input type="checkbox"/> <sub>3</sub> | <input type="checkbox"/> <sub>0</sub> |       |
| 胸部及肺   | <input type="checkbox"/> <sub>1</sub> | <input type="checkbox"/> <sub>2</sub> | <input type="checkbox"/> <sub>3</sub> | <input type="checkbox"/> <sub>0</sub> |       |
| 腹部     | <input type="checkbox"/> <sub>1</sub> | <input type="checkbox"/> <sub>2</sub> | <input type="checkbox"/> <sub>3</sub> | <input type="checkbox"/> <sub>0</sub> |       |
| 神经系统   | <input type="checkbox"/> <sub>1</sub> | <input type="checkbox"/> <sub>2</sub> | <input type="checkbox"/> <sub>3</sub> | <input type="checkbox"/> <sub>0</sub> |       |
| 骨骼肌系统  | <input type="checkbox"/> <sub>1</sub> | <input type="checkbox"/> <sub>2</sub> | <input type="checkbox"/> <sub>3</sub> | <input type="checkbox"/> <sub>0</sub> |       |
| 淋巴系统   | <input type="checkbox"/> <sub>1</sub> | <input type="checkbox"/> <sub>2</sub> | <input type="checkbox"/> <sub>3</sub> | <input type="checkbox"/> <sub>0</sub> |       |

**有无呼吸道症状**      <sub>0</sub> 未查, 原因 \_\_\_\_\_

检查日期: |\_\_|\_\_|\_\_|年|\_\_|\_\_|月|\_\_|\_\_|日

受试者有无呼吸道症状: <sub>0</sub> 无      <sub>1</sub> 有, 请描述: \_\_\_\_\_

|                             |                             |
|-----------------------------|-----------------------------|
| 研究方案编号: KY2020-29           | 筛选期/治疗期                     |
| 研究中心编号 <input type="text"/> | 受试者筛选号 <input type="text"/> |
|                             | 访视 1 (D-3~1)                |

| 血常规 <input type="checkbox"/> 未查, 原因 <input type="text"/>                   |                                       |                                                                                    |                                       |                                       |                                       |                                       |
|----------------------------------------------------------------------------|---------------------------------------|------------------------------------------------------------------------------------|---------------------------------------|---------------------------------------|---------------------------------------|---------------------------------------|
| 采样日期: <input type="text"/> 年 <input type="text"/> 月 <input type="text"/> 日 |                                       |                                                                                    | 正常值范围编号: <input type="text"/>         |                                       |                                       |                                       |
| 检查项目                                                                       | 测量结果                                  |                                                                                    | 结果判定                                  |                                       |                                       | 未查                                    |
|                                                                            | 实测值                                   | 单位                                                                                 | 正常                                    | 异常                                    |                                       |                                       |
|                                                                            |                                       |                                                                                    |                                       | 无临床意义                                 | 有临床意义                                 |                                       |
| 红细胞计数 (RBC)                                                                | <input type="checkbox"/> <sub>1</sub> | 10 <sup>12</sup> /L <input type="checkbox"/> <sub>2</sub> 其他: <input type="text"/> | <input type="checkbox"/> <sub>1</sub> | <input type="checkbox"/> <sub>2</sub> | <input type="checkbox"/> <sub>3</sub> | <input type="checkbox"/> <sub>0</sub> |
| 白细胞计数 (WBC)                                                                | <input type="checkbox"/> <sub>1</sub> | 10 <sup>9</sup> /L <input type="checkbox"/> <sub>2</sub> 其他: <input type="text"/>  | <input type="checkbox"/> <sub>1</sub> | <input type="checkbox"/> <sub>2</sub> | <input type="checkbox"/> <sub>3</sub> | <input type="checkbox"/> <sub>0</sub> |
| 血红蛋白 (Hb)                                                                  | <input type="checkbox"/> <sub>1</sub> | g/L <input type="checkbox"/> <sub>2</sub> 其他: <input type="text"/>                 | <input type="checkbox"/> <sub>1</sub> | <input type="checkbox"/> <sub>2</sub> | <input type="checkbox"/> <sub>3</sub> | <input type="checkbox"/> <sub>0</sub> |
| 血小板计数 (PLT)                                                                | <input type="checkbox"/> <sub>1</sub> | 10 <sup>9</sup> /L <input type="checkbox"/> <sub>2</sub> 其他: <input type="text"/>  | <input type="checkbox"/> <sub>1</sub> | <input type="checkbox"/> <sub>2</sub> | <input type="checkbox"/> <sub>3</sub> | <input type="checkbox"/> <sub>0</sub> |
| 中性粒细胞计数 (ANC)                                                              | <input type="checkbox"/> <sub>1</sub> | 10 <sup>9</sup> /L <input type="checkbox"/> <sub>2</sub> 其他: <input type="text"/>  | <input type="checkbox"/> <sub>1</sub> | <input type="checkbox"/> <sub>2</sub> | <input type="checkbox"/> <sub>3</sub> | <input type="checkbox"/> <sub>0</sub> |
| 淋巴细胞计数 (LY)                                                                | <input type="checkbox"/> <sub>1</sub> | 10 <sup>9</sup> /L <input type="checkbox"/> <sub>2</sub> 其他: <input type="text"/>  | <input type="checkbox"/> <sub>1</sub> | <input type="checkbox"/> <sub>2</sub> | <input type="checkbox"/> <sub>3</sub> | <input type="checkbox"/> <sub>0</sub> |
| 单核细胞计数 (MO)                                                                | <input type="checkbox"/> <sub>1</sub> | 10 <sup>9</sup> /L <input type="checkbox"/> <sub>2</sub> 其他: <input type="text"/>  | <input type="checkbox"/> <sub>1</sub> | <input type="checkbox"/> <sub>2</sub> | <input type="checkbox"/> <sub>3</sub> | <input type="checkbox"/> <sub>0</sub> |
| 嗜酸性粒细胞计数 (EO)                                                              | <input type="checkbox"/> <sub>1</sub> | 10 <sup>9</sup> /L <input type="checkbox"/> <sub>2</sub> 其他: <input type="text"/>  | <input type="checkbox"/> <sub>1</sub> | <input type="checkbox"/> <sub>2</sub> | <input type="checkbox"/> <sub>3</sub> | <input type="checkbox"/> <sub>0</sub> |
| 嗜碱性粒细胞计数 (BA)                                                              | <input type="checkbox"/> <sub>1</sub> | 10 <sup>9</sup> /L <input type="checkbox"/> <sub>2</sub> 其他: <input type="text"/>  | <input type="checkbox"/> <sub>1</sub> | <input type="checkbox"/> <sub>2</sub> | <input type="checkbox"/> <sub>3</sub> | <input type="checkbox"/> <sub>0</sub> |

| 血生化 <input type="checkbox"/> 未查, 原因 <input type="text"/>                   |                                       |                                                                       |                                       |                                       |                                       |                                       |
|----------------------------------------------------------------------------|---------------------------------------|-----------------------------------------------------------------------|---------------------------------------|---------------------------------------|---------------------------------------|---------------------------------------|
| 采样日期: <input type="text"/> 年 <input type="text"/> 月 <input type="text"/> 日 |                                       |                                                                       | 正常值范围编号: <input type="text"/>         |                                       |                                       |                                       |
| 检查项目                                                                       | 测量结果                                  |                                                                       | 结果判定                                  |                                       |                                       | 未查                                    |
|                                                                            | 实测值                                   | 单位                                                                    | 正常                                    | 异常                                    |                                       |                                       |
|                                                                            |                                       |                                                                       |                                       | 无临床意义                                 | 有临床意义                                 |                                       |
| 谷丙转氨酶 (ALT)                                                                | <input type="checkbox"/> <sub>1</sub> | U/L <input type="checkbox"/> <sub>2</sub> 其他: <input type="text"/>    | <input type="checkbox"/> <sub>1</sub> | <input type="checkbox"/> <sub>2</sub> | <input type="checkbox"/> <sub>3</sub> | <input type="checkbox"/> <sub>0</sub> |
| 谷草转氨酶 (AST)                                                                | <input type="checkbox"/> <sub>1</sub> | U/L <input type="checkbox"/> <sub>2</sub> 其他: <input type="text"/>    | <input type="checkbox"/> <sub>1</sub> | <input type="checkbox"/> <sub>2</sub> | <input type="checkbox"/> <sub>3</sub> | <input type="checkbox"/> <sub>0</sub> |
| 总胆红素 (TBIL)                                                                | <input type="checkbox"/> <sub>1</sub> | μmol/L <input type="checkbox"/> <sub>2</sub> 其他: <input type="text"/> | <input type="checkbox"/> <sub>1</sub> | <input type="checkbox"/> <sub>2</sub> | <input type="checkbox"/> <sub>3</sub> | <input type="checkbox"/> <sub>0</sub> |
| 白蛋白 (ALB)                                                                  | <input type="checkbox"/> <sub>1</sub> | g/L <input type="checkbox"/> <sub>2</sub> 其他: <input type="text"/>    | <input type="checkbox"/> <sub>1</sub> | <input type="checkbox"/> <sub>2</sub> | <input type="checkbox"/> <sub>3</sub> | <input type="checkbox"/> <sub>0</sub> |
| γ-谷氨酰转肽酶 (GGT)                                                             | <input type="checkbox"/> <sub>1</sub> | U/L <input type="checkbox"/> <sub>2</sub> 其他: <input type="text"/>    | <input type="checkbox"/> <sub>1</sub> | <input type="checkbox"/> <sub>2</sub> | <input type="checkbox"/> <sub>3</sub> | <input type="checkbox"/> <sub>0</sub> |
| 乳酸脱氢酶 (LDH)                                                                | <input type="checkbox"/> <sub>1</sub> | U/L <input type="checkbox"/> <sub>2</sub> 其他: <input type="text"/>    | <input type="checkbox"/> <sub>1</sub> | <input type="checkbox"/> <sub>2</sub> | <input type="checkbox"/> <sub>3</sub> | <input type="checkbox"/> <sub>0</sub> |
| 肌酸激酶 (CK)                                                                  | <input type="checkbox"/> <sub>1</sub> | U/L <input type="checkbox"/> <sub>2</sub> 其他: <input type="text"/>    | <input type="checkbox"/> <sub>1</sub> | <input type="checkbox"/> <sub>2</sub> | <input type="checkbox"/> <sub>3</sub> | <input type="checkbox"/> <sub>0</sub> |
| 肌酸激酶同工酶 (CK-MB)                                                            | <input type="checkbox"/> <sub>1</sub> | U/L <input type="checkbox"/> <sub>2</sub> 其他: <input type="text"/>    | <input type="checkbox"/> <sub>1</sub> | <input type="checkbox"/> <sub>2</sub> | <input type="checkbox"/> <sub>3</sub> | <input type="checkbox"/> <sub>0</sub> |
| 血尿素氮 (BUN)                                                                 | <input type="checkbox"/> <sub>1</sub> | mmol/L <input type="checkbox"/> <sub>2</sub> 其他: <input type="text"/> | <input type="checkbox"/> <sub>1</sub> | <input type="checkbox"/> <sub>2</sub> | <input type="checkbox"/> <sub>3</sub> | <input type="checkbox"/> <sub>0</sub> |
| 尿素 (Urea)                                                                  | <input type="checkbox"/> <sub>1</sub> | mmol/L <input type="checkbox"/> <sub>2</sub> 其他: <input type="text"/> | <input type="checkbox"/> <sub>1</sub> | <input type="checkbox"/> <sub>2</sub> | <input type="checkbox"/> <sub>3</sub> | <input type="checkbox"/> <sub>0</sub> |
| 血肌酐 (CR)                                                                   | <input type="checkbox"/> <sub>1</sub> | μmol/L <input type="checkbox"/> <sub>2</sub> 其他: <input type="text"/> | <input type="checkbox"/> <sub>1</sub> | <input type="checkbox"/> <sub>2</sub> | <input type="checkbox"/> <sub>3</sub> | <input type="checkbox"/> <sub>0</sub> |

|                   |              |
|-------------------|--------------|
| 研究方案编号: KY2020-29 | 筛选期/治疗期      |
| 研究中心编号  __        | 受试者筛选号  __   |
|                   | 访视 1 (D-3~1) |

**尿常规** 未查, 原因\_\_\_\_\_

采样日期: |\_\_|年|\_\_|月|\_\_|日 正常值范围编号: |\_\_|

| 检查项目   | 测量结果 |                                                                        | 结果判定                       |                            |                            | 未查                         |
|--------|------|------------------------------------------------------------------------|----------------------------|----------------------------|----------------------------|----------------------------|
|        | 实测值  | 单位                                                                     | 正常                         | 异常                         |                            |                            |
|        |      |                                                                        |                            | 无临床意义                      | 有临床意义                      |                            |
| 尿蛋白    |      | <input type="checkbox"/> 1 不适用 <input type="checkbox"/> 2 其他: _____    | <input type="checkbox"/> 1 | <input type="checkbox"/> 2 | <input type="checkbox"/> 3 | <input type="checkbox"/> 0 |
| 尿葡萄糖   |      | <input type="checkbox"/> 1 mmol/L <input type="checkbox"/> 2 其他: _____ | <input type="checkbox"/> 1 | <input type="checkbox"/> 2 | <input type="checkbox"/> 3 | <input type="checkbox"/> 0 |
| 尿 PH 值 |      | <input type="checkbox"/> 1 不适用 <input type="checkbox"/> 2 其他: _____    | <input type="checkbox"/> 1 | <input type="checkbox"/> 2 | <input type="checkbox"/> 3 | <input type="checkbox"/> 0 |
| 尿红细胞   |      | <input type="checkbox"/> 1 不适用 <input type="checkbox"/> 2 其他: _____    | <input type="checkbox"/> 1 | <input type="checkbox"/> 2 | <input type="checkbox"/> 3 | <input type="checkbox"/> 0 |
| 尿白细胞   |      | <input type="checkbox"/> 1 不适用 <input type="checkbox"/> 2 其他: _____    | <input type="checkbox"/> 1 | <input type="checkbox"/> 2 | <input type="checkbox"/> 3 | <input type="checkbox"/> 0 |
| 尿酮体    |      | <input type="checkbox"/> 1 不适用 <input type="checkbox"/> 2 其他: _____    | <input type="checkbox"/> 1 | <input type="checkbox"/> 2 | <input type="checkbox"/> 3 | <input type="checkbox"/> 0 |

**凝血功能** 未查, 原因\_\_\_\_\_

采样日期: |\_\_|年|\_\_|月|\_\_|日 正常值范围编号: |\_\_|

| 检查项目              | 测量结果 |                                                                     | 结果判定                       |                            |                            | 未查                         |
|-------------------|------|---------------------------------------------------------------------|----------------------------|----------------------------|----------------------------|----------------------------|
|                   | 实测值  | 单位                                                                  | 正常                         | 异常                         |                            |                            |
|                   |      |                                                                     |                            | 无临床意义                      | 有临床意义                      |                            |
| 凝血酶原时间 (PT)       |      | <input type="checkbox"/> 1 S <input type="checkbox"/> 2 其他: _____   | <input type="checkbox"/> 1 | <input type="checkbox"/> 2 | <input type="checkbox"/> 3 | <input type="checkbox"/> 0 |
| 活化部分凝血活酶时间 (APTT) |      | <input type="checkbox"/> 1 S <input type="checkbox"/> 2 其他: _____   | <input type="checkbox"/> 1 | <input type="checkbox"/> 2 | <input type="checkbox"/> 3 | <input type="checkbox"/> 0 |
| 凝血酶时间 (TT)        |      | <input type="checkbox"/> 1 S <input type="checkbox"/> 2 其他: _____   | <input type="checkbox"/> 1 | <input type="checkbox"/> 2 | <input type="checkbox"/> 3 | <input type="checkbox"/> 0 |
| 血浆纤维蛋白原 (Fbg)     |      | <input type="checkbox"/> 1 g/L <input type="checkbox"/> 2 其他: _____ | <input type="checkbox"/> 1 | <input type="checkbox"/> 2 | <input type="checkbox"/> 3 | <input type="checkbox"/> 0 |
| 国际标准化比率 (INR)     |      | <input type="checkbox"/> 1 不适用 <input type="checkbox"/> 2 其他: _____ | <input type="checkbox"/> 1 | <input type="checkbox"/> 2 | <input type="checkbox"/> 3 | <input type="checkbox"/> 0 |

**C 反应蛋白 (CRP)** 未查, 原因\_\_\_\_\_

采样日期: |\_\_|年|\_\_|月|\_\_|日 正常值范围编号: |\_\_|

| 检查项目         | 测量结果 |                                                                      | 结果判定                       |                            |                            |
|--------------|------|----------------------------------------------------------------------|----------------------------|----------------------------|----------------------------|
|              | 实测值  | 单位                                                                   | 正常                         | 异常                         |                            |
|              |      |                                                                      |                            | 无临床意义                      | 有临床意义                      |
| C 反应蛋白 (CRP) |      | <input type="checkbox"/> 1 mg/L <input type="checkbox"/> 2 其他: _____ | <input type="checkbox"/> 1 | <input type="checkbox"/> 2 | <input type="checkbox"/> 3 |

**血沉 (ESR)** 未查, 原因\_\_\_\_\_

采样日期: |\_\_|年|\_\_|月|\_\_|日 正常值范围编号: |\_\_|

| 检查项目 | 测量结果 |    | 结果判定 |    |
|------|------|----|------|----|
|      | 实测值  | 单位 | 正常   | 异常 |
|      |      |    |      |    |



|                             |                             |
|-----------------------------|-----------------------------|
| 研究方案编号: KY2020-29           | 筛选期/治疗期                     |
| 研究中心编号 <input type="text"/> | 受试者筛选号 <input type="text"/> |
| 访视 1 (D-3~1)                |                             |

|          |                                                                                            |                                       |                                       |                                       |
|----------|--------------------------------------------------------------------------------------------|---------------------------------------|---------------------------------------|---------------------------------------|
| 血沉 (ESR) | <input type="checkbox"/> <sub>1</sub> mm/h <input type="checkbox"/> <sub>2</sub> 其他: _____ | <input type="checkbox"/> <sub>1</sub> | 无临床意义                                 | 有临床意义                                 |
|          |                                                                                            |                                       | <input type="checkbox"/> <sub>2</sub> | <input type="checkbox"/> <sub>3</sub> |

| <b>TNF-α</b> <input type="checkbox"/> <sub>0</sub> 未查, 原因_____             |      |                                                                                             |                                       |                                                                                            |
|----------------------------------------------------------------------------|------|---------------------------------------------------------------------------------------------|---------------------------------------|--------------------------------------------------------------------------------------------|
| 采样日期: <input type="text"/> 年 <input type="text"/> 月 <input type="text"/> 日 |      |                                                                                             | 正常值范围编号: <input type="text"/>         |                                                                                            |
| 检查项目                                                                       | 测量结果 |                                                                                             | 结果判定                                  |                                                                                            |
| TNF-α                                                                      | 实测值  | 单位                                                                                          | 正常                                    | 异常                                                                                         |
|                                                                            |      | <input type="checkbox"/> <sub>1</sub> pg/mL <input type="checkbox"/> <sub>2</sub> 其他: _____ | <input type="checkbox"/> <sub>1</sub> | <input type="checkbox"/> <sub>2</sub> 无临床意义<br><input type="checkbox"/> <sub>3</sub> 有临床意义 |

| <b>IL-6</b> <input type="checkbox"/> <sub>0</sub> 未查, 原因_____              |      |                                                                                             |                                       |                                                                                            |
|----------------------------------------------------------------------------|------|---------------------------------------------------------------------------------------------|---------------------------------------|--------------------------------------------------------------------------------------------|
| 采样日期: <input type="text"/> 年 <input type="text"/> 月 <input type="text"/> 日 |      |                                                                                             | 正常值范围编号: <input type="text"/>         |                                                                                            |
| 检查项目                                                                       | 测量结果 |                                                                                             | 结果判定                                  |                                                                                            |
| IL-6                                                                       | 实测值  | 单位                                                                                          | 正常                                    | 异常                                                                                         |
|                                                                            |      | <input type="checkbox"/> <sub>1</sub> pg/mL <input type="checkbox"/> <sub>2</sub> 其他: _____ | <input type="checkbox"/> <sub>1</sub> | <input type="checkbox"/> <sub>2</sub> 无临床意义<br><input type="checkbox"/> <sub>3</sub> 有临床意义 |

|                                                                                                                                            |  |  |                               |  |
|--------------------------------------------------------------------------------------------------------------------------------------------|--|--|-------------------------------|--|
| <b>尿或血清 HCG (仅适用于育龄女性)</b> <input type="checkbox"/> <sub>0</sub> 未查, 原因_____                                                               |  |  |                               |  |
| <input type="checkbox"/> <sub>1</sub> 不适用 (男性或不具有生育能力的女性)                                                                                  |  |  |                               |  |
| 采样日期: <input type="text"/> 年 <input type="text"/> 月 <input type="text"/> 日                                                                 |  |  | 正常值范围编号: <input type="text"/> |  |
| 采样类别: <input type="checkbox"/> <sub>1</sub> 血液 <input type="checkbox"/> <sub>2</sub> 尿液                                                    |  |  |                               |  |
| 检查结果: <input type="checkbox"/> <sub>1</sub> 阴性 <input type="checkbox"/> <sub>2</sub> 阳性 <input type="checkbox"/> <sub>3</sub> 其他: _____    |  |  |                               |  |
| 单位: <input type="checkbox"/> <sub>1</sub> 不适用 <input type="checkbox"/> <sub>2</sub> mIU/mL <input type="checkbox"/> <sub>3</sub> 其他: _____ |  |  |                               |  |

|                                                                                                                                            |  |  |  |  |
|--------------------------------------------------------------------------------------------------------------------------------------------|--|--|--|--|
| <b>12 导联心电图</b> <input type="checkbox"/> <sub>0</sub> 未查, 原因_____                                                                          |  |  |  |  |
| 检查日期: <input type="text"/> 年 <input type="text"/> 月 <input type="text"/> 日                                                                 |  |  |  |  |
| 检查结果: <input type="checkbox"/> <sub>1</sub> 正常 <input type="checkbox"/> <sub>2</sub> 异常无临床意义 <input type="checkbox"/> <sub>3</sub> 异常有临床意义 |  |  |  |  |
| 若“异常”, 请描述: _____                                                                                                                          |  |  |  |  |

|                                                                                                                                            |  |  |  |  |
|--------------------------------------------------------------------------------------------------------------------------------------------|--|--|--|--|
| <b>胸部 CT</b> <input type="checkbox"/> <sub>0</sub> 未查, 原因_____                                                                             |  |  |  |  |
| 检查日期: <input type="text"/> 年 <input type="text"/> 月 <input type="text"/> 日                                                                 |  |  |  |  |
| 检查结果: <input type="checkbox"/> <sub>1</sub> 正常 <input type="checkbox"/> <sub>2</sub> 异常无临床意义 <input type="checkbox"/> <sub>3</sub> 异常有临床意义 |  |  |  |  |

|                             |                             |
|-----------------------------|-----------------------------|
| 研究方案编号: KY2020-29           | 筛选期/治疗期                     |
| 研究中心编号 <input type="text"/> | 受试者筛选号 <input type="text"/> |
| 访视 1 (D-3~1)                |                             |

若异常, 请描述: \_\_\_\_\_  
 \_\_\_\_\_

|                                                                      |                                                                                                                                                                                                                                                                      |
|----------------------------------------------------------------------|----------------------------------------------------------------------------------------------------------------------------------------------------------------------------------------------------------------------------------------------------------------------|
| <b>新型冠状病毒核酸检测</b> <input type="checkbox"/> <sub>0</sub> 未查, 原因 _____ |                                                                                                                                                                                                                                                                      |
| 采样部位 (可多选)                                                           | <input type="checkbox"/> <sub>0</sub> 上呼吸道 <input type="checkbox"/> <sub>1</sub> 下呼吸道                                                                                                                                                                                |
| 上呼吸道                                                                 | 采样日期: <input type="text"/> 年 <input type="text"/> 月 <input type="text"/> 日<br>检查结果: <input type="checkbox"/> <sub>1</sub> 阴性 <input type="checkbox"/> <sub>2</sub> 阳性 <input type="checkbox"/> <sub>3</sub> 无法判断 <input type="checkbox"/> <sub>4</sub> 其他, 请描述 _____ |
| 下呼吸道                                                                 | 采样日期: <input type="text"/> 年 <input type="text"/> 月 <input type="text"/> 日<br>检查结果: <input type="checkbox"/> <sub>1</sub> 阴性 <input type="checkbox"/> <sub>2</sub> 阳性 <input type="checkbox"/> <sub>3</sub> 无法判断 <input type="checkbox"/> <sub>4</sub> 其他, 请描述 _____ |
| 结果判定                                                                 | <input type="checkbox"/> <sub>1</sub> 阴性 <input type="checkbox"/> <sub>2</sub> 阳性 <input type="checkbox"/> <sub>3</sub> 无法判断 <input type="checkbox"/> <sub>4</sub> 其他, 请描述 _____                                                                                     |

|                                                                            |
|----------------------------------------------------------------------------|
| <b>指脉氧饱和度</b> (不吸氧情况下) <input type="checkbox"/> <sub>0</sub> 未查, 原因 _____  |
| 检查日期: <input type="text"/> 年 <input type="text"/> 月 <input type="text"/> 日 |
| 实测值: _____ % (静息状态)                                                        |

| <b>动脉血气分析</b> <input type="checkbox"/> <sub>0</sub> 未查, 原因 _____                                                         |                                                                                            |    |                                       |                                       |                                       |                                       |
|--------------------------------------------------------------------------------------------------------------------------|--------------------------------------------------------------------------------------------|----|---------------------------------------|---------------------------------------|---------------------------------------|---------------------------------------|
| 是否吸氧: <input type="checkbox"/> <sub>0</sub> 否 <input type="checkbox"/> <sub>1</sub> 是, 吸氧浓度 (FiO <sub>2</sub> ): _____ % |                                                                                            |    |                                       |                                       |                                       |                                       |
| 采样日期: <input type="text"/> 年 <input type="text"/> 月 <input type="text"/> 日                                               |                                                                                            |    |                                       | 正常值范围编号: <input type="text"/>         |                                       |                                       |
| 检查项目                                                                                                                     | 测量结果                                                                                       |    | 结果判定                                  |                                       |                                       | 未查                                    |
|                                                                                                                          | 实测值                                                                                        | 单位 | 正常                                    | 异常                                    |                                       |                                       |
|                                                                                                                          |                                                                                            |    |                                       | 无临床意义                                 | 有临床意义                                 |                                       |
| 动脉血氧分压 (PaO <sub>2</sub> )                                                                                               | <input type="checkbox"/> <sub>1</sub> mmHg <input type="checkbox"/> <sub>2</sub> 其他: _____ |    | <input type="checkbox"/> <sub>1</sub> | <input type="checkbox"/> <sub>2</sub> | <input type="checkbox"/> <sub>3</sub> | <input type="checkbox"/> <sub>0</sub> |
| 血氧饱和度 (SaO <sub>2</sub> )                                                                                                | <input type="checkbox"/> <sub>1</sub> % <input type="checkbox"/> <sub>2</sub> 其他: _____    |    | <input type="checkbox"/> <sub>1</sub> | <input type="checkbox"/> <sub>2</sub> | <input type="checkbox"/> <sub>3</sub> | <input type="checkbox"/> <sub>0</sub> |

|                                                                 |                                                                                                                                                                                                                                                                                                                                                                                              |
|-----------------------------------------------------------------|----------------------------------------------------------------------------------------------------------------------------------------------------------------------------------------------------------------------------------------------------------------------------------------------------------------------------------------------------------------------------------------------|
| <b>临床状态</b> <input type="checkbox"/> <sub>0</sub> 未评价, 原因 _____ |                                                                                                                                                                                                                                                                                                                                                                                              |
| 评价日期                                                            | <input type="text"/> 年 <input type="text"/> 月 <input type="text"/> 日                                                                                                                                                                                                                                                                                                                         |
| 评价结果                                                            | <input type="checkbox"/> <sub>1</sub> 1级: 出院<br><input type="checkbox"/> <sub>2</sub> 2级: 住院, 不需要氧疗<br><input type="checkbox"/> <sub>3</sub> 3级: 住院, 需要氧疗 (非NIV/HFNC)<br><input type="checkbox"/> <sub>4</sub> 4级: ICU/住院, 需要无创机械通气 (NIV) /高流量鼻导管氧疗 (HFNC)<br><input type="checkbox"/> <sub>5</sub> 5级: ICU, 需要体外膜肺氧合 (ECMO) 和/或有创机械通气 (IMV)<br><input type="checkbox"/> <sub>6</sub> 6级: 死亡 |

|                   |                                |
|-------------------|--------------------------------|
| 研究方案编号: KY2020-29 | 筛选期/治疗期                        |
| 研究中心编号 [ ] [ ]    | 受试者筛选号 [ ] [ ] [ ] [ ] [ ] [ ] |
|                   | 访视 1 (D-3~1)                   |

|                                                                                                   |
|---------------------------------------------------------------------------------------------------|
| <b>筛选结果</b>                                                                                       |
| 受试者是否筛选成功?<br><input type="checkbox"/> 否, 筛选失败的主要原因: _____<br><input type="checkbox"/> 是, 请进行随机化。 |
| 随机日期: [ ] [ ] [ ] [ ] 年 [ ] [ ] 月 [ ] [ ] 日                                                       |
| 随机编号: _____                                                                                       |
| 随机分组: <input type="checkbox"/> <sub>1</sub> 试验组 <input type="checkbox"/> <sub>2</sub> 对照组         |

自签署知情同意书以来, 如有不良事件发生, 请填写“不良事件”表; 如有合并药物治疗, 请填写“既往/合并药物治疗”表; 如有合并非药物治疗, 请填写“既往/合并非药物治疗”表; 如有计划外检查, 请填写“计划外检查”表。; 如有 IMV/NIV、ECMO、HFNC、氧疗, 请填写在“IMV/NIV、ECMO、 HFNC、氧疗”表中。

|                   |              |
|-------------------|--------------|
| 研究方案编号: KY2020-29 | 治疗期          |
| 研究中心编号  __        | 受试者筛选号  __   |
|                   | 访视 2 (D4±1d) |

本次访视日期: |\_\_|年|\_\_|月|\_\_|日

|                                           |                         |      |                                                                                                                                                                                                                                                                    |
|-------------------------------------------|-------------------------|------|--------------------------------------------------------------------------------------------------------------------------------------------------------------------------------------------------------------------------------------------------------------------|
| 生命体征 <input type="checkbox"/> 未查, 原因_____ |                         |      |                                                                                                                                                                                                                                                                    |
| 检查日期                                      | __ 年 __ 月 __ 日          |      |                                                                                                                                                                                                                                                                    |
| 日最高体温                                     | __ . __ °C              | 测量方式 | <input type="checkbox"/> <sub>1</sub> 腋下 <input type="checkbox"/> <sub>2</sub> 口腔 <input type="checkbox"/> <sub>3</sub> 肛门<br><input type="checkbox"/> <sub>4</sub> 耳朵 <input type="checkbox"/> <sub>5</sub> 未知 <input type="checkbox"/> <sub>6</sub> 其他, 请描述_____ |
| 呼吸频率                                      | __ 次/分                  | 脉搏   | __ 次/分                                                                                                                                                                                                                                                             |
| 血压                                        | __ / __  mmHg (收缩压/舒张压) |      |                                                                                                                                                                                                                                                                    |

|                                              |                                                                   |
|----------------------------------------------|-------------------------------------------------------------------|
| 有无呼吸道症状 <input type="checkbox"/> 未查, 原因_____ |                                                                   |
| 检查日期:                                        | __ 年 __ 月 __ 日                                                    |
| 受试者有无呼吸道症状:                                  | <input type="checkbox"/> 无 <input type="checkbox"/> 有, 请描述: _____ |

| 血常规 <input type="checkbox"/> 未查, 原因_____ |                                                                                                           |    |                                       |                                       |                                       |                                       |
|------------------------------------------|-----------------------------------------------------------------------------------------------------------|----|---------------------------------------|---------------------------------------|---------------------------------------|---------------------------------------|
| 采样日期:                                    | __ 年 __ 月 __ 日                                                                                            |    |                                       | 正常值范围编号:                              | __                                    |                                       |
| 检查项目                                     | 测量结果                                                                                                      |    | 结果判定                                  |                                       |                                       | 未查                                    |
|                                          | 实测值                                                                                                       | 单位 | 正常                                    | 异常                                    |                                       |                                       |
|                                          |                                                                                                           |    |                                       | 无临床意义                                 | 有临床意义                                 |                                       |
| 红细胞计数 (RBC)                              | <input type="checkbox"/> <sub>1</sub> 10 <sup>12</sup> /L <input type="checkbox"/> <sub>2</sub> 其他: _____ |    | <input type="checkbox"/> <sub>1</sub> | <input type="checkbox"/> <sub>2</sub> | <input type="checkbox"/> <sub>3</sub> | <input type="checkbox"/> <sub>0</sub> |
| 白细胞计数 (WBC)                              | <input type="checkbox"/> <sub>1</sub> 10 <sup>9</sup> /L <input type="checkbox"/> <sub>2</sub> 其他: _____  |    | <input type="checkbox"/> <sub>1</sub> | <input type="checkbox"/> <sub>2</sub> | <input type="checkbox"/> <sub>3</sub> | <input type="checkbox"/> <sub>0</sub> |
| 血红蛋白 (Hb)                                | <input type="checkbox"/> <sub>1</sub> g/L <input type="checkbox"/> <sub>2</sub> 其他: _____                 |    | <input type="checkbox"/> <sub>1</sub> | <input type="checkbox"/> <sub>2</sub> | <input type="checkbox"/> <sub>3</sub> | <input type="checkbox"/> <sub>0</sub> |
| 血小板计数 (PLT)                              | <input type="checkbox"/> <sub>1</sub> 10 <sup>9</sup> /L <input type="checkbox"/> <sub>2</sub> 其他: _____  |    | <input type="checkbox"/> <sub>1</sub> | <input type="checkbox"/> <sub>2</sub> | <input type="checkbox"/> <sub>3</sub> | <input type="checkbox"/> <sub>0</sub> |
| 中性粒细胞计数 (ANC)                            | <input type="checkbox"/> <sub>1</sub> 10 <sup>9</sup> /L <input type="checkbox"/> <sub>2</sub> 其他: _____  |    | <input type="checkbox"/> <sub>1</sub> | <input type="checkbox"/> <sub>2</sub> | <input type="checkbox"/> <sub>3</sub> | <input type="checkbox"/> <sub>0</sub> |
| 淋巴细胞计数 (LY)                              | <input type="checkbox"/> <sub>1</sub> 10 <sup>9</sup> /L <input type="checkbox"/> <sub>2</sub> 其他: _____  |    | <input type="checkbox"/> <sub>1</sub> | <input type="checkbox"/> <sub>2</sub> | <input type="checkbox"/> <sub>3</sub> | <input type="checkbox"/> <sub>0</sub> |
| 单核细胞计数 (MO)                              | <input type="checkbox"/> <sub>1</sub> 10 <sup>9</sup> /L <input type="checkbox"/> <sub>2</sub> 其他: _____  |    | <input type="checkbox"/> <sub>1</sub> | <input type="checkbox"/> <sub>2</sub> | <input type="checkbox"/> <sub>3</sub> | <input type="checkbox"/> <sub>0</sub> |
| 嗜酸性粒细胞计数 (EO)                            | <input type="checkbox"/> <sub>1</sub> 10 <sup>9</sup> /L <input type="checkbox"/> <sub>2</sub> 其他: _____  |    | <input type="checkbox"/> <sub>1</sub> | <input type="checkbox"/> <sub>2</sub> | <input type="checkbox"/> <sub>3</sub> | <input type="checkbox"/> <sub>0</sub> |
| 嗜碱性粒细胞计数 (BA)                            | <input type="checkbox"/> <sub>1</sub> 10 <sup>9</sup> /L <input type="checkbox"/> <sub>2</sub> 其他: _____  |    | <input type="checkbox"/> <sub>1</sub> | <input type="checkbox"/> <sub>2</sub> | <input type="checkbox"/> <sub>3</sub> | <input type="checkbox"/> <sub>0</sub> |

| 血生化 <input type="checkbox"/> 未查, 原因_____ |                |    |      |          |       |    |
|------------------------------------------|----------------|----|------|----------|-------|----|
| 采样日期:                                    | __ 年 __ 月 __ 日 |    |      | 正常值范围编号: | __    |    |
| 检查项目                                     | 测量结果           |    | 结果判定 |          |       | 未查 |
|                                          | 实测值            | 单位 | 正常   | 异常       |       |    |
|                                          |                |    |      | 无临床意义    | 有临床意义 |    |

|                             |                             |
|-----------------------------|-----------------------------|
| 研究方案编号: KY2020-29           | 治疗期                         |
| 研究中心编号 <input type="text"/> | 受试者筛选号 <input type="text"/> |
| 访视 2 (D4±1d)                |                             |

|                 |                                                                                              |                                       |                                       |                                       |                                       |
|-----------------|----------------------------------------------------------------------------------------------|---------------------------------------|---------------------------------------|---------------------------------------|---------------------------------------|
| 谷丙转氨酶 (ALT)     | <input type="checkbox"/> <sub>1</sub> U/L <input type="checkbox"/> <sub>2</sub> 其他: _____    | <input type="checkbox"/> <sub>1</sub> | <input type="checkbox"/> <sub>2</sub> | <input type="checkbox"/> <sub>3</sub> | <input type="checkbox"/> <sub>0</sub> |
| 谷草转氨酶 (AST)     | <input type="checkbox"/> <sub>1</sub> U/L <input type="checkbox"/> <sub>2</sub> 其他: _____    | <input type="checkbox"/> <sub>1</sub> | <input type="checkbox"/> <sub>2</sub> | <input type="checkbox"/> <sub>3</sub> | <input type="checkbox"/> <sub>0</sub> |
| 总胆红素 (TBIL)     | <input type="checkbox"/> <sub>1</sub> μmol/L <input type="checkbox"/> <sub>2</sub> 其他: _____ | <input type="checkbox"/> <sub>1</sub> | <input type="checkbox"/> <sub>2</sub> | <input type="checkbox"/> <sub>3</sub> | <input type="checkbox"/> <sub>0</sub> |
| 白蛋白 (ALB)       | <input type="checkbox"/> <sub>1</sub> g/L <input type="checkbox"/> <sub>2</sub> 其他: _____    | <input type="checkbox"/> <sub>1</sub> | <input type="checkbox"/> <sub>2</sub> | <input type="checkbox"/> <sub>3</sub> | <input type="checkbox"/> <sub>0</sub> |
| γ-谷氨酰转肽酶 (GGT)  | <input type="checkbox"/> <sub>1</sub> U/L <input type="checkbox"/> <sub>2</sub> 其他: _____    | <input type="checkbox"/> <sub>1</sub> | <input type="checkbox"/> <sub>2</sub> | <input type="checkbox"/> <sub>3</sub> | <input type="checkbox"/> <sub>0</sub> |
| 乳酸脱氢酶 (LDH)     | <input type="checkbox"/> <sub>1</sub> U/L <input type="checkbox"/> <sub>2</sub> 其他: _____    | <input type="checkbox"/> <sub>1</sub> | <input type="checkbox"/> <sub>2</sub> | <input type="checkbox"/> <sub>3</sub> | <input type="checkbox"/> <sub>0</sub> |
| 肌酸激酶 (CK)       | <input type="checkbox"/> <sub>1</sub> U/L <input type="checkbox"/> <sub>2</sub> 其他: _____    | <input type="checkbox"/> <sub>1</sub> | <input type="checkbox"/> <sub>2</sub> | <input type="checkbox"/> <sub>3</sub> | <input type="checkbox"/> <sub>0</sub> |
| 肌酸激酶同工酶 (CK-MB) | <input type="checkbox"/> <sub>1</sub> U/L <input type="checkbox"/> <sub>2</sub> 其他: _____    | <input type="checkbox"/> <sub>1</sub> | <input type="checkbox"/> <sub>2</sub> | <input type="checkbox"/> <sub>3</sub> | <input type="checkbox"/> <sub>0</sub> |
| 血尿素氮 (BUN)      | <input type="checkbox"/> <sub>1</sub> mmol/L <input type="checkbox"/> <sub>2</sub> 其他: _____ | <input type="checkbox"/> <sub>1</sub> | <input type="checkbox"/> <sub>2</sub> | <input type="checkbox"/> <sub>3</sub> | <input type="checkbox"/> <sub>0</sub> |
| 尿素 (Urea)       | <input type="checkbox"/> <sub>1</sub> mmol/L <input type="checkbox"/> <sub>2</sub> 其他: _____ | <input type="checkbox"/> <sub>1</sub> | <input type="checkbox"/> <sub>2</sub> | <input type="checkbox"/> <sub>3</sub> | <input type="checkbox"/> <sub>0</sub> |
| 血肌酐 (CR)        | <input type="checkbox"/> <sub>1</sub> μmol/L <input type="checkbox"/> <sub>2</sub> 其他: _____ | <input type="checkbox"/> <sub>1</sub> | <input type="checkbox"/> <sub>2</sub> | <input type="checkbox"/> <sub>3</sub> | <input type="checkbox"/> <sub>0</sub> |

| 凝血功能 <input type="checkbox"/> <sub>0</sub> 未查, 原因 _____                    |                                                                                           |                                       |                                       |                                       |                                       |    |
|----------------------------------------------------------------------------|-------------------------------------------------------------------------------------------|---------------------------------------|---------------------------------------|---------------------------------------|---------------------------------------|----|
| 采样日期: <input type="text"/> 年 <input type="text"/> 月 <input type="text"/> 日 |                                                                                           |                                       |                                       | 正常值范围编号: <input type="text"/>         |                                       |    |
| 检查项目                                                                       | 测量结果                                                                                      |                                       | 结果判定                                  |                                       |                                       | 未查 |
|                                                                            | 实测值                                                                                       | 单位                                    | 正常                                    | 异常                                    |                                       |    |
|                                                                            |                                                                                           |                                       |                                       | 无临床意义                                 | 有临床意义                                 |    |
| 凝血酶原时间 (PT)                                                                | <input type="checkbox"/> <sub>1</sub> S <input type="checkbox"/> <sub>2</sub> 其他: _____   | <input type="checkbox"/> <sub>1</sub> | <input type="checkbox"/> <sub>2</sub> | <input type="checkbox"/> <sub>3</sub> | <input type="checkbox"/> <sub>0</sub> |    |
| 活化部分凝血活酶时间 (APTT)                                                          | <input type="checkbox"/> <sub>1</sub> S <input type="checkbox"/> <sub>2</sub> 其他: _____   | <input type="checkbox"/> <sub>1</sub> | <input type="checkbox"/> <sub>2</sub> | <input type="checkbox"/> <sub>3</sub> | <input type="checkbox"/> <sub>0</sub> |    |
| 凝血酶时间 (TT)                                                                 | <input type="checkbox"/> <sub>1</sub> S <input type="checkbox"/> <sub>2</sub> 其他: _____   | <input type="checkbox"/> <sub>1</sub> | <input type="checkbox"/> <sub>2</sub> | <input type="checkbox"/> <sub>3</sub> | <input type="checkbox"/> <sub>0</sub> |    |
| 血浆纤维蛋白原 (Fbg)                                                              | <input type="checkbox"/> <sub>1</sub> g/L <input type="checkbox"/> <sub>2</sub> 其他: _____ | <input type="checkbox"/> <sub>1</sub> | <input type="checkbox"/> <sub>2</sub> | <input type="checkbox"/> <sub>3</sub> | <input type="checkbox"/> <sub>0</sub> |    |
| 国际标准化比率 (INR)                                                              | <input type="checkbox"/> <sub>1</sub> 不适用 <input type="checkbox"/> <sub>2</sub> 其他: _____ | <input type="checkbox"/> <sub>1</sub> | <input type="checkbox"/> <sub>2</sub> | <input type="checkbox"/> <sub>3</sub> | <input type="checkbox"/> <sub>0</sub> |    |

| C 反应蛋白 (CRP) <input type="checkbox"/> <sub>0</sub> 未查, 原因 _____            |                                                                                            |                                       |                                       |                                       |       |  |
|----------------------------------------------------------------------------|--------------------------------------------------------------------------------------------|---------------------------------------|---------------------------------------|---------------------------------------|-------|--|
| 采样日期: <input type="text"/> 年 <input type="text"/> 月 <input type="text"/> 日 |                                                                                            |                                       |                                       | 正常值范围编号: <input type="text"/>         |       |  |
| 检查项目                                                                       | 测量结果                                                                                       |                                       | 结果判定                                  |                                       |       |  |
|                                                                            | 实测值                                                                                        | 单位                                    | 正常                                    | 异常                                    |       |  |
|                                                                            |                                                                                            |                                       |                                       | 无临床意义                                 | 有临床意义 |  |
| C 反应蛋白 (CRP)                                                               | <input type="checkbox"/> <sub>1</sub> mg/L <input type="checkbox"/> <sub>2</sub> 其他: _____ | <input type="checkbox"/> <sub>1</sub> | <input type="checkbox"/> <sub>2</sub> | <input type="checkbox"/> <sub>3</sub> |       |  |

|                                                                            |  |  |  |                               |  |  |
|----------------------------------------------------------------------------|--|--|--|-------------------------------|--|--|
| 血沉 (ESR) <input type="checkbox"/> <sub>0</sub> 未查, 原因 _____                |  |  |  |                               |  |  |
| 采样日期: <input type="text"/> 年 <input type="text"/> 月 <input type="text"/> 日 |  |  |  | 正常值范围编号: <input type="text"/> |  |  |

|                             |                             |
|-----------------------------|-----------------------------|
| 研究方案编号: KY2020-29           | 治疗期                         |
| 研究中心编号 <input type="text"/> | 受试者筛选号 <input type="text"/> |
| 访视 2 (D4±1d)                |                             |

| 检查项目     | 测量结果 |                                                                                            | 结果判定                                  |                                       |                                       |
|----------|------|--------------------------------------------------------------------------------------------|---------------------------------------|---------------------------------------|---------------------------------------|
|          | 实测值  | 单位                                                                                         | 正常                                    | 异常                                    |                                       |
| 血沉 (ESR) |      | <input type="checkbox"/> <sub>1</sub> mm/h <input type="checkbox"/> <sub>2</sub> 其他: _____ | <input type="checkbox"/> <sub>1</sub> | <input type="checkbox"/> <sub>2</sub> | <input type="checkbox"/> <sub>3</sub> |
|          |      |                                                                                            |                                       | 无临床意义                                 | 有临床意义                                 |

|                                                                                                          |
|----------------------------------------------------------------------------------------------------------|
| <b>TNF-α</b> <input type="checkbox"/> <sub>0</sub> 未查, 原因 _____                                          |
| 采样日期: <input type="text"/> 年 <input type="text"/> 月 <input type="text"/> 日 正常值范围编号: <input type="text"/> |

| 检查项目  | 测量结果 |                                                                                             | 结果判定                                  |                                       |                                       |
|-------|------|---------------------------------------------------------------------------------------------|---------------------------------------|---------------------------------------|---------------------------------------|
|       | 实测值  | 单位                                                                                          | 正常                                    | 异常                                    |                                       |
| TNF-α |      | <input type="checkbox"/> <sub>1</sub> pg/mL <input type="checkbox"/> <sub>2</sub> 其他: _____ | <input type="checkbox"/> <sub>1</sub> | <input type="checkbox"/> <sub>2</sub> | <input type="checkbox"/> <sub>3</sub> |
|       |      |                                                                                             |                                       | 无临床意义                                 | 有临床意义                                 |

|                                                                                                          |
|----------------------------------------------------------------------------------------------------------|
| <b>IL-6</b> <input type="checkbox"/> <sub>0</sub> 未查, 原因 _____                                           |
| 采样日期: <input type="text"/> 年 <input type="text"/> 月 <input type="text"/> 日 正常值范围编号: <input type="text"/> |

| 检查项目 | 测量结果 |                                                                                             | 结果判定                                  |                                       |                                       |
|------|------|---------------------------------------------------------------------------------------------|---------------------------------------|---------------------------------------|---------------------------------------|
|      | 实测值  | 单位                                                                                          | 正常                                    | 异常                                    |                                       |
| IL-6 |      | <input type="checkbox"/> <sub>1</sub> pg/mL <input type="checkbox"/> <sub>2</sub> 其他: _____ | <input type="checkbox"/> <sub>1</sub> | <input type="checkbox"/> <sub>2</sub> | <input type="checkbox"/> <sub>3</sub> |
|      |      |                                                                                             |                                       | 无临床意义                                 | 有临床意义                                 |

|                                                                                                  |                                                                                                                                                                                                                                                                      |
|--------------------------------------------------------------------------------------------------|----------------------------------------------------------------------------------------------------------------------------------------------------------------------------------------------------------------------------------------------------------------------|
| <b>新型冠状病毒核酸检测</b> <input type="checkbox"/> <sub>0</sub> 未查, 原因 _____                             |                                                                                                                                                                                                                                                                      |
| 采样部位 (可多选) <input type="checkbox"/> <sub>0</sub> 上呼吸道 <input type="checkbox"/> <sub>1</sub> 下呼吸道 |                                                                                                                                                                                                                                                                      |
| 上呼吸道                                                                                             | 采样日期: <input type="text"/> 年 <input type="text"/> 月 <input type="text"/> 日<br>检查结果: <input type="checkbox"/> <sub>1</sub> 阴性 <input type="checkbox"/> <sub>2</sub> 阳性 <input type="checkbox"/> <sub>3</sub> 无法判断 <input type="checkbox"/> <sub>4</sub> 其他, 请描述 _____ |
| 下呼吸道                                                                                             | 采样日期: <input type="text"/> 年 <input type="text"/> 月 <input type="text"/> 日<br>检查结果: <input type="checkbox"/> <sub>1</sub> 阴性 <input type="checkbox"/> <sub>2</sub> 阳性 <input type="checkbox"/> <sub>3</sub> 无法判断 <input type="checkbox"/> <sub>4</sub> 其他, 请描述 _____ |
| 结果判定                                                                                             | <input type="checkbox"/> <sub>1</sub> 阴性 <input type="checkbox"/> <sub>2</sub> 阳性 <input type="checkbox"/> <sub>3</sub> 无法判断 <input type="checkbox"/> <sub>4</sub> 其他, 请描述 _____                                                                                     |

|                                                                            |
|----------------------------------------------------------------------------|
| <b>指脉氧饱和度 (不吸氧情况下)</b> <input type="checkbox"/> <sub>0</sub> 未查, 原因 _____  |
| 检查日期: <input type="text"/> 年 <input type="text"/> 月 <input type="text"/> 日 |
| 实测值: _____ % (静息状态)                                                        |

|                                                                                                                          |
|--------------------------------------------------------------------------------------------------------------------------|
| <b>动脉血气分析</b> <input type="checkbox"/> <sub>0</sub> 未查, 原因 _____<br><input type="checkbox"/> <sub>1</sub> 不适用            |
| 是否吸氧: <input type="checkbox"/> <sub>0</sub> 否 <input type="checkbox"/> <sub>1</sub> 是, 吸氧浓度 (FiO <sub>2</sub> ): _____ % |
| 采样日期: <input type="text"/> 年 <input type="text"/> 月 <input type="text"/> 日 正常值范围编号: <input type="text"/>                 |

|                             |                             |
|-----------------------------|-----------------------------|
| 研究方案编号: KY2020-29           | 治疗期                         |
| 研究中心编号 <input type="text"/> | 受试者筛选号 <input type="text"/> |
| 访视 2 (D4±1d)                |                             |

| 检查项目                       | 测量结果 |                                                                                            | 结果判定                                  |                                       |                                       | 未查                                    |
|----------------------------|------|--------------------------------------------------------------------------------------------|---------------------------------------|---------------------------------------|---------------------------------------|---------------------------------------|
|                            | 实测值  | 单位                                                                                         | 正常                                    | 异常                                    |                                       |                                       |
|                            |      |                                                                                            |                                       | 无临床意义                                 | 有临床意义                                 |                                       |
| 动脉血氧分压 (PaO <sub>2</sub> ) |      | <input type="checkbox"/> <sub>1</sub> mmHg <input type="checkbox"/> <sub>2</sub> 其他: _____ | <input type="checkbox"/> <sub>1</sub> | <input type="checkbox"/> <sub>2</sub> | <input type="checkbox"/> <sub>3</sub> | <input type="checkbox"/> <sub>0</sub> |
| 血氧饱和度 (SaO <sub>2</sub> )  |      | <input type="checkbox"/> <sub>1</sub> % <input type="checkbox"/> <sub>2</sub> 其他: _____    | <input type="checkbox"/> <sub>1</sub> | <input type="checkbox"/> <sub>2</sub> | <input type="checkbox"/> <sub>3</sub> | <input type="checkbox"/> <sub>0</sub> |

自上次访视以来,受试者如有不良事件发生,请填写“不良事件”表;如有合并药物治疗,请填写“既往/合并药物治疗”表;如有合并非药物治疗,请填写“既往/合并非药物治疗”表;如有计划外检查,请填写“计划外检查”表。如有 IMV/NIV、ECMO、HFNC、氧疗,请填写在“IMV/NIV、ECMO、HFNC、氧疗”表中。

|                   |              |
|-------------------|--------------|
| 研究方案编号: KY2020-29 | 治疗期          |
| 研究中心编号  __        | 受试者筛选号  __   |
|                   | 访视 3 (D7±1d) |

本次访视日期: |\_\_|年|\_\_|月|\_\_|日

|                                            |                         |      |                                                                                                                                                                                                                                                                     |
|--------------------------------------------|-------------------------|------|---------------------------------------------------------------------------------------------------------------------------------------------------------------------------------------------------------------------------------------------------------------------|
| 生命体征 <input type="checkbox"/> 未查, 原因 _____ |                         |      |                                                                                                                                                                                                                                                                     |
| 检查日期                                       | __ 年 __ 月 __ 日          |      |                                                                                                                                                                                                                                                                     |
| 日最高体温                                      | __ . __ °C              | 测量方式 | <input type="checkbox"/> <sub>1</sub> 腋下 <input type="checkbox"/> <sub>2</sub> 口腔 <input type="checkbox"/> <sub>3</sub> 肛门<br><input type="checkbox"/> <sub>4</sub> 耳朵 <input type="checkbox"/> <sub>5</sub> 未知 <input type="checkbox"/> <sub>6</sub> 其他, 请描述 _____ |
| 呼吸频率                                       | __ 次/分                  | 脉搏   | __ 次/分                                                                                                                                                                                                                                                              |
| 血压                                         | __ / __  mmHg (收缩压/舒张压) |      |                                                                                                                                                                                                                                                                     |

|                                               |                                                                   |
|-----------------------------------------------|-------------------------------------------------------------------|
| 有无呼吸道症状 <input type="checkbox"/> 未查, 原因 _____ |                                                                   |
| 检查日期:                                         | __ 年 __ 月 __ 日                                                    |
| 受试者有无呼吸道症状:                                   | <input type="checkbox"/> 无 <input type="checkbox"/> 有, 请描述: _____ |

| 血常规 <input type="checkbox"/> 未查, 原因 _____ |                                                                                                           |    |                                       |                                       |                                       |                                       |
|-------------------------------------------|-----------------------------------------------------------------------------------------------------------|----|---------------------------------------|---------------------------------------|---------------------------------------|---------------------------------------|
| 采样日期:  __ 年 __ 月 __ 日                     |                                                                                                           |    | 正常值范围编号:  __                          |                                       |                                       |                                       |
| 检查项目                                      | 测量结果                                                                                                      |    | 结果判定                                  |                                       |                                       | 未查                                    |
|                                           | 实测值                                                                                                       | 单位 | 正常                                    | 异常                                    |                                       |                                       |
|                                           |                                                                                                           |    |                                       | 无临床意义                                 | 有临床意义                                 |                                       |
| 红细胞计数 (RBC)                               | <input type="checkbox"/> <sub>1</sub> 10 <sup>12</sup> /L <input type="checkbox"/> <sub>2</sub> 其他: _____ |    | <input type="checkbox"/> <sub>1</sub> | <input type="checkbox"/> <sub>2</sub> | <input type="checkbox"/> <sub>3</sub> | <input type="checkbox"/> <sub>0</sub> |
| 白细胞计数 (WBC)                               | <input type="checkbox"/> <sub>1</sub> 10 <sup>9</sup> /L <input type="checkbox"/> <sub>2</sub> 其他: _____  |    | <input type="checkbox"/> <sub>1</sub> | <input type="checkbox"/> <sub>2</sub> | <input type="checkbox"/> <sub>3</sub> | <input type="checkbox"/> <sub>0</sub> |
| 血红蛋白 (Hb)                                 | <input type="checkbox"/> <sub>1</sub> g/L <input type="checkbox"/> <sub>2</sub> 其他: _____                 |    | <input type="checkbox"/> <sub>1</sub> | <input type="checkbox"/> <sub>2</sub> | <input type="checkbox"/> <sub>3</sub> | <input type="checkbox"/> <sub>0</sub> |
| 血小板计数 (PLT)                               | <input type="checkbox"/> <sub>1</sub> 10 <sup>9</sup> /L <input type="checkbox"/> <sub>2</sub> 其他: _____  |    | <input type="checkbox"/> <sub>1</sub> | <input type="checkbox"/> <sub>2</sub> | <input type="checkbox"/> <sub>3</sub> | <input type="checkbox"/> <sub>0</sub> |
| 中性粒细胞计数 (ANC)                             | <input type="checkbox"/> <sub>1</sub> 10 <sup>9</sup> /L <input type="checkbox"/> <sub>2</sub> 其他: _____  |    | <input type="checkbox"/> <sub>1</sub> | <input type="checkbox"/> <sub>2</sub> | <input type="checkbox"/> <sub>3</sub> | <input type="checkbox"/> <sub>0</sub> |
| 淋巴细胞计数 (LY)                               | <input type="checkbox"/> <sub>1</sub> 10 <sup>9</sup> /L <input type="checkbox"/> <sub>2</sub> 其他: _____  |    | <input type="checkbox"/> <sub>1</sub> | <input type="checkbox"/> <sub>2</sub> | <input type="checkbox"/> <sub>3</sub> | <input type="checkbox"/> <sub>0</sub> |
| 单核细胞计数 (MO)                               | <input type="checkbox"/> <sub>1</sub> 10 <sup>9</sup> /L <input type="checkbox"/> <sub>2</sub> 其他: _____  |    | <input type="checkbox"/> <sub>1</sub> | <input type="checkbox"/> <sub>2</sub> | <input type="checkbox"/> <sub>3</sub> | <input type="checkbox"/> <sub>0</sub> |
| 嗜酸性粒细胞计数 (EO)                             | <input type="checkbox"/> <sub>1</sub> 10 <sup>9</sup> /L <input type="checkbox"/> <sub>2</sub> 其他: _____  |    | <input type="checkbox"/> <sub>1</sub> | <input type="checkbox"/> <sub>2</sub> | <input type="checkbox"/> <sub>3</sub> | <input type="checkbox"/> <sub>0</sub> |
| 嗜碱性粒细胞计数 (BA)                             | <input type="checkbox"/> <sub>1</sub> 10 <sup>9</sup> /L <input type="checkbox"/> <sub>2</sub> 其他: _____  |    | <input type="checkbox"/> <sub>1</sub> | <input type="checkbox"/> <sub>2</sub> | <input type="checkbox"/> <sub>3</sub> | <input type="checkbox"/> <sub>0</sub> |

| 血生化 <input type="checkbox"/> 未查, 原因 _____ |      |    |              |       |       |    |
|-------------------------------------------|------|----|--------------|-------|-------|----|
| 采样日期:  __ 年 __ 月 __ 日                     |      |    | 正常值范围编号:  __ |       |       |    |
| 检查项目                                      | 测量结果 |    | 结果判定         |       |       | 未查 |
|                                           | 实测值  | 单位 | 正常           | 异常    |       |    |
|                                           |      |    |              | 无临床意义 | 有临床意义 |    |



|                             |                             |
|-----------------------------|-----------------------------|
| 研究方案编号: KY2020-29           | 治疗期                         |
| 研究中心编号 <input type="text"/> | 受试者筛选号 <input type="text"/> |
| 访视 3 (D7±1d)                |                             |

|                 |                                                                                              |                                       |                                       |                                       |                                       |
|-----------------|----------------------------------------------------------------------------------------------|---------------------------------------|---------------------------------------|---------------------------------------|---------------------------------------|
| 谷丙转氨酶 (ALT)     | <input type="checkbox"/> <sub>1</sub> U/L <input type="checkbox"/> <sub>2</sub> 其他: _____    | <input type="checkbox"/> <sub>1</sub> | <input type="checkbox"/> <sub>2</sub> | <input type="checkbox"/> <sub>3</sub> | <input type="checkbox"/> <sub>0</sub> |
| 谷草转氨酶 (AST)     | <input type="checkbox"/> <sub>1</sub> U/L <input type="checkbox"/> <sub>2</sub> 其他: _____    | <input type="checkbox"/> <sub>1</sub> | <input type="checkbox"/> <sub>2</sub> | <input type="checkbox"/> <sub>3</sub> | <input type="checkbox"/> <sub>0</sub> |
| 总胆红素 (TBIL)     | <input type="checkbox"/> <sub>1</sub> μmol/L <input type="checkbox"/> <sub>2</sub> 其他: _____ | <input type="checkbox"/> <sub>1</sub> | <input type="checkbox"/> <sub>2</sub> | <input type="checkbox"/> <sub>3</sub> | <input type="checkbox"/> <sub>0</sub> |
| 白蛋白 (ALB)       | <input type="checkbox"/> <sub>1</sub> g/L <input type="checkbox"/> <sub>2</sub> 其他: _____    | <input type="checkbox"/> <sub>1</sub> | <input type="checkbox"/> <sub>2</sub> | <input type="checkbox"/> <sub>3</sub> | <input type="checkbox"/> <sub>0</sub> |
| γ-谷氨酰转肽酶 (GGT)  | <input type="checkbox"/> <sub>1</sub> U/L <input type="checkbox"/> <sub>2</sub> 其他: _____    | <input type="checkbox"/> <sub>1</sub> | <input type="checkbox"/> <sub>2</sub> | <input type="checkbox"/> <sub>3</sub> | <input type="checkbox"/> <sub>0</sub> |
| 乳酸脱氢酶 (LDH)     | <input type="checkbox"/> <sub>1</sub> U/L <input type="checkbox"/> <sub>2</sub> 其他: _____    | <input type="checkbox"/> <sub>1</sub> | <input type="checkbox"/> <sub>2</sub> | <input type="checkbox"/> <sub>3</sub> | <input type="checkbox"/> <sub>0</sub> |
| 肌酸激酶 (CK)       | <input type="checkbox"/> <sub>1</sub> U/L <input type="checkbox"/> <sub>2</sub> 其他: _____    | <input type="checkbox"/> <sub>1</sub> | <input type="checkbox"/> <sub>2</sub> | <input type="checkbox"/> <sub>3</sub> | <input type="checkbox"/> <sub>0</sub> |
| 肌酸激酶同工酶 (CK-MB) | <input type="checkbox"/> <sub>1</sub> U/L <input type="checkbox"/> <sub>2</sub> 其他: _____    | <input type="checkbox"/> <sub>1</sub> | <input type="checkbox"/> <sub>2</sub> | <input type="checkbox"/> <sub>3</sub> | <input type="checkbox"/> <sub>0</sub> |
| 血尿素氮 (BUN)      | <input type="checkbox"/> <sub>1</sub> mmol/L <input type="checkbox"/> <sub>2</sub> 其他: _____ | <input type="checkbox"/> <sub>1</sub> | <input type="checkbox"/> <sub>2</sub> | <input type="checkbox"/> <sub>3</sub> | <input type="checkbox"/> <sub>0</sub> |
| 尿素 (Urea)       | <input type="checkbox"/> <sub>1</sub> mmol/L <input type="checkbox"/> <sub>2</sub> 其他: _____ | <input type="checkbox"/> <sub>1</sub> | <input type="checkbox"/> <sub>2</sub> | <input type="checkbox"/> <sub>3</sub> | <input type="checkbox"/> <sub>0</sub> |
| 血肌酐 (CR)        | <input type="checkbox"/> <sub>1</sub> μmol/L <input type="checkbox"/> <sub>2</sub> 其他: _____ | <input type="checkbox"/> <sub>1</sub> | <input type="checkbox"/> <sub>2</sub> | <input type="checkbox"/> <sub>3</sub> | <input type="checkbox"/> <sub>0</sub> |

| 凝血功能 <input type="checkbox"/> <sub>0</sub> 未查, 原因 _____                    |                                                                                           |                                       |                                       |                                       |                                       |    |
|----------------------------------------------------------------------------|-------------------------------------------------------------------------------------------|---------------------------------------|---------------------------------------|---------------------------------------|---------------------------------------|----|
| 采样日期: <input type="text"/> 年 <input type="text"/> 月 <input type="text"/> 日 |                                                                                           |                                       |                                       | 正常值范围编号: <input type="text"/>         |                                       |    |
| 检查项目                                                                       | 测量结果                                                                                      |                                       | 结果判定                                  |                                       |                                       | 未查 |
|                                                                            | 实测值                                                                                       | 单位                                    | 正常                                    | 异常                                    |                                       |    |
|                                                                            |                                                                                           |                                       |                                       | 无临床意义                                 | 有临床意义                                 |    |
| 凝血酶原时间 (PT)                                                                | <input type="checkbox"/> <sub>1</sub> S <input type="checkbox"/> <sub>2</sub> 其他: _____   | <input type="checkbox"/> <sub>1</sub> | <input type="checkbox"/> <sub>2</sub> | <input type="checkbox"/> <sub>3</sub> | <input type="checkbox"/> <sub>0</sub> |    |
| 活化部分凝血活酶时间 (APTT)                                                          | <input type="checkbox"/> <sub>1</sub> S <input type="checkbox"/> <sub>2</sub> 其他: _____   | <input type="checkbox"/> <sub>1</sub> | <input type="checkbox"/> <sub>2</sub> | <input type="checkbox"/> <sub>3</sub> | <input type="checkbox"/> <sub>0</sub> |    |
| 凝血酶时间 (TT)                                                                 | <input type="checkbox"/> <sub>1</sub> S <input type="checkbox"/> <sub>2</sub> 其他: _____   | <input type="checkbox"/> <sub>1</sub> | <input type="checkbox"/> <sub>2</sub> | <input type="checkbox"/> <sub>3</sub> | <input type="checkbox"/> <sub>0</sub> |    |
| 血浆纤维蛋白原 (Fbg)                                                              | <input type="checkbox"/> <sub>1</sub> g/L <input type="checkbox"/> <sub>2</sub> 其他: _____ | <input type="checkbox"/> <sub>1</sub> | <input type="checkbox"/> <sub>2</sub> | <input type="checkbox"/> <sub>3</sub> | <input type="checkbox"/> <sub>0</sub> |    |
| 国际标准化比率 (INR)                                                              | <input type="checkbox"/> <sub>1</sub> 不适用 <input type="checkbox"/> <sub>2</sub> 其他: _____ | <input type="checkbox"/> <sub>1</sub> | <input type="checkbox"/> <sub>2</sub> | <input type="checkbox"/> <sub>3</sub> | <input type="checkbox"/> <sub>0</sub> |    |

| C 反应蛋白 (CRP) <input type="checkbox"/> <sub>0</sub> 未查, 原因 _____            |                                                                                            |                                       |                                       |                                       |                                       |    |
|----------------------------------------------------------------------------|--------------------------------------------------------------------------------------------|---------------------------------------|---------------------------------------|---------------------------------------|---------------------------------------|----|
| 采样日期: <input type="text"/> 年 <input type="text"/> 月 <input type="text"/> 日 |                                                                                            |                                       |                                       | 正常值范围编号: <input type="text"/>         |                                       |    |
| 检查项目                                                                       | 测量结果                                                                                       |                                       | 结果判定                                  |                                       |                                       | 未查 |
|                                                                            | 实测值                                                                                        | 单位                                    | 正常                                    | 异常                                    |                                       |    |
|                                                                            |                                                                                            |                                       |                                       | 无临床意义                                 | 有临床意义                                 |    |
| C 反应蛋白 (CRP)                                                               | <input type="checkbox"/> <sub>1</sub> mg/L <input type="checkbox"/> <sub>2</sub> 其他: _____ | <input type="checkbox"/> <sub>1</sub> | <input type="checkbox"/> <sub>2</sub> | <input type="checkbox"/> <sub>3</sub> | <input type="checkbox"/> <sub>0</sub> |    |

|                                                                            |  |  |  |                               |  |  |
|----------------------------------------------------------------------------|--|--|--|-------------------------------|--|--|
| 血沉 (ESR) <input type="checkbox"/> <sub>0</sub> 未查, 原因 _____                |  |  |  |                               |  |  |
| 采样日期: <input type="text"/> 年 <input type="text"/> 月 <input type="text"/> 日 |  |  |  | 正常值范围编号: <input type="text"/> |  |  |

|                             |                             |
|-----------------------------|-----------------------------|
| 研究方案编号: KY2020-29           | 治疗期                         |
| 研究中心编号 <input type="text"/> | 受试者筛选号 <input type="text"/> |
| 访视 3 (D7±1d)                |                             |

| 检查项目     | 测量结果 |                                                                                            | 结果判定                                  |                                       |                                       |
|----------|------|--------------------------------------------------------------------------------------------|---------------------------------------|---------------------------------------|---------------------------------------|
|          | 实测值  | 单位                                                                                         | 正常                                    | 异常                                    |                                       |
| 血沉 (ESR) |      | <input type="checkbox"/> <sub>1</sub> mm/h <input type="checkbox"/> <sub>2</sub> 其他: _____ | <input type="checkbox"/> <sub>1</sub> | <input type="checkbox"/> <sub>2</sub> | <input type="checkbox"/> <sub>3</sub> |
|          |      |                                                                                            |                                       | 无临床意义                                 | 有临床意义                                 |

| <b>TNF-α</b> <input type="checkbox"/> <sub>0</sub> 未查, 原因 _____            |      |                                                                                             |                                       |                                       |                                       |
|----------------------------------------------------------------------------|------|---------------------------------------------------------------------------------------------|---------------------------------------|---------------------------------------|---------------------------------------|
| 采样日期: <input type="text"/> 年 <input type="text"/> 月 <input type="text"/> 日 |      |                                                                                             | 正常值范围编号: <input type="text"/>         |                                       |                                       |
| 检查项目                                                                       | 测量结果 |                                                                                             | 结果判定                                  |                                       |                                       |
|                                                                            | 实测值  | 单位                                                                                          | 正常                                    | 异常                                    |                                       |
| TNF-α                                                                      |      | <input type="checkbox"/> <sub>1</sub> pg/mL <input type="checkbox"/> <sub>2</sub> 其他: _____ | <input type="checkbox"/> <sub>1</sub> | <input type="checkbox"/> <sub>2</sub> | <input type="checkbox"/> <sub>3</sub> |
|                                                                            |      |                                                                                             |                                       | 无临床意义                                 | 有临床意义                                 |

| <b>IL-6</b> <input type="checkbox"/> <sub>0</sub> 未查, 原因 _____             |      |                                                                                             |                                       |                                       |                                       |
|----------------------------------------------------------------------------|------|---------------------------------------------------------------------------------------------|---------------------------------------|---------------------------------------|---------------------------------------|
| 采样日期: <input type="text"/> 年 <input type="text"/> 月 <input type="text"/> 日 |      |                                                                                             | 正常值范围编号: <input type="text"/>         |                                       |                                       |
| 检查项目                                                                       | 测量结果 |                                                                                             | 结果判定                                  |                                       |                                       |
|                                                                            | 实测值  | 单位                                                                                          | 正常                                    | 异常                                    |                                       |
| IL-6                                                                       |      | <input type="checkbox"/> <sub>1</sub> pg/mL <input type="checkbox"/> <sub>2</sub> 其他: _____ | <input type="checkbox"/> <sub>1</sub> | <input type="checkbox"/> <sub>2</sub> | <input type="checkbox"/> <sub>3</sub> |
|                                                                            |      |                                                                                             |                                       | 无临床意义                                 | 有临床意义                                 |

|                                                                      |                                                                                                                                                                                                                                                                      |
|----------------------------------------------------------------------|----------------------------------------------------------------------------------------------------------------------------------------------------------------------------------------------------------------------------------------------------------------------|
| <b>新型冠状病毒核酸检测</b> <input type="checkbox"/> <sub>0</sub> 未查, 原因 _____ |                                                                                                                                                                                                                                                                      |
| 采样部位 (可多选)                                                           | <input type="checkbox"/> <sub>0</sub> 上呼吸道 <input type="checkbox"/> <sub>1</sub> 下呼吸道                                                                                                                                                                                |
| 上呼吸道                                                                 | 采样日期: <input type="text"/> 年 <input type="text"/> 月 <input type="text"/> 日<br>检查结果: <input type="checkbox"/> <sub>1</sub> 阴性 <input type="checkbox"/> <sub>2</sub> 阳性 <input type="checkbox"/> <sub>3</sub> 无法判断 <input type="checkbox"/> <sub>4</sub> 其他, 请描述 _____ |
| 下呼吸道                                                                 | 采样日期: <input type="text"/> 年 <input type="text"/> 月 <input type="text"/> 日<br>检查结果: <input type="checkbox"/> <sub>1</sub> 阴性 <input type="checkbox"/> <sub>2</sub> 阳性 <input type="checkbox"/> <sub>3</sub> 无法判断 <input type="checkbox"/> <sub>4</sub> 其他, 请描述 _____ |
| 结果判定                                                                 | <input type="checkbox"/> <sub>1</sub> 阴性 <input type="checkbox"/> <sub>2</sub> 阳性 <input type="checkbox"/> <sub>3</sub> 无法判断 <input type="checkbox"/> <sub>4</sub> 其他, 请描述 _____                                                                                     |

|                                                                            |  |
|----------------------------------------------------------------------------|--|
| <b>指脉氧饱和度 (不吸氧情况下)</b> <input type="checkbox"/> <sub>0</sub> 未查, 原因 _____  |  |
| 检查日期: <input type="text"/> 年 <input type="text"/> 月 <input type="text"/> 日 |  |
| 实测值: _____ % (静息状态)                                                        |  |

|                                                                                                                          |                               |
|--------------------------------------------------------------------------------------------------------------------------|-------------------------------|
| <b>动脉血气分析</b> <input type="checkbox"/> <sub>0</sub> 未查, 原因 _____<br><input type="checkbox"/> <sub>1</sub> 不适用            |                               |
| 是否吸氧: <input type="checkbox"/> <sub>0</sub> 否 <input type="checkbox"/> <sub>1</sub> 是, 吸氧浓度 (FiO <sub>2</sub> ): _____ % |                               |
| 采样日期: <input type="text"/> 年 <input type="text"/> 月 <input type="text"/> 日                                               | 正常值范围编号: <input type="text"/> |

|                             |                             |
|-----------------------------|-----------------------------|
| 研究方案编号: KY2020-29           | 治疗期                         |
| 研究中心编号 <input type="text"/> | 受试者筛选号 <input type="text"/> |
| 访视 3 (D7±1d)                |                             |

| 检查项目                       | 测量结果                                                                                       |                                       | 结果判定                                  |                                       |                                       | 未查 |
|----------------------------|--------------------------------------------------------------------------------------------|---------------------------------------|---------------------------------------|---------------------------------------|---------------------------------------|----|
|                            | 实测值                                                                                        | 单位                                    | 正常                                    | 异常                                    |                                       |    |
|                            |                                                                                            |                                       |                                       | 无临床意义                                 | 有临床意义                                 |    |
| 动脉血氧分压 (PaO <sub>2</sub> ) | <input type="checkbox"/> <sub>1</sub> mmHg <input type="checkbox"/> <sub>2</sub> 其他: _____ | <input type="checkbox"/> <sub>1</sub> | <input type="checkbox"/> <sub>2</sub> | <input type="checkbox"/> <sub>3</sub> | <input type="checkbox"/> <sub>0</sub> |    |
| 血氧饱和度 (SaO <sub>2</sub> )  | <input type="checkbox"/> <sub>1</sub> % <input type="checkbox"/> <sub>2</sub> 其他: _____    | <input type="checkbox"/> <sub>1</sub> | <input type="checkbox"/> <sub>2</sub> | <input type="checkbox"/> <sub>3</sub> | <input type="checkbox"/> <sub>0</sub> |    |

|      |                                                                                                                                                                                                                                                                                                                                                                                              |
|------|----------------------------------------------------------------------------------------------------------------------------------------------------------------------------------------------------------------------------------------------------------------------------------------------------------------------------------------------------------------------------------------------|
| 临床状态 | <input type="checkbox"/> <sub>0</sub> 未评价, 原因 _____                                                                                                                                                                                                                                                                                                                                          |
| 评价日期 | <input type="text"/> 年 <input type="text"/> 月 <input type="text"/> 日                                                                                                                                                                                                                                                                                                                         |
| 评价结果 | <input type="checkbox"/> <sub>1</sub> 1级: 出院<br><input type="checkbox"/> <sub>2</sub> 2级: 住院, 不需要氧疗<br><input type="checkbox"/> <sub>3</sub> 3级: 住院, 需要氧疗 (非NIV/HFNC)<br><input type="checkbox"/> <sub>4</sub> 4级: ICU/住院, 需要无创机械通气 (NIV) /高流量鼻导管氧疗 (HFNC)<br><input type="checkbox"/> <sub>5</sub> 5级: ICU, 需要体外膜肺氧合 (ECMO) 和/或有创机械通气 (IMV)<br><input type="checkbox"/> <sub>6</sub> 6级: 死亡 |

自上次访视以来, 受试者如有不良事件发生, 请填写“不良事件”表; 如有合并药物治疗, 请填写“既往/合并药物治疗”表; 如有合并非药物治疗, 请填写“既往/合并非药物治疗”表; 如有计划外检查, 请填写“计划外检查”表。如有 IMV/NIV、ECMO、HFNC、氧疗, 请填写在“IMV/NIV、ECMO、HFNC、氧疗”表中。



|                   |                                      |
|-------------------|--------------------------------------|
| 研究方案编号: KY2020-29 | 治疗期                                  |
| 研究中心编号            | 受试者筛选号                 访视 4 (D10±1d) |

|                 |                                                                                             |                                       |                                       |                                       |                                       |
|-----------------|---------------------------------------------------------------------------------------------|---------------------------------------|---------------------------------------|---------------------------------------|---------------------------------------|
| 谷丙转氨酶 (ALT)     | <input type="checkbox"/> <sub>1</sub> U/L <input type="checkbox"/> <sub>2</sub> 其他: ____    | <input type="checkbox"/> <sub>1</sub> | <input type="checkbox"/> <sub>2</sub> | <input type="checkbox"/> <sub>3</sub> | <input type="checkbox"/> <sub>0</sub> |
| 谷草转氨酶 (AST)     | <input type="checkbox"/> <sub>1</sub> U/L <input type="checkbox"/> <sub>2</sub> 其他: ____    | <input type="checkbox"/> <sub>1</sub> | <input type="checkbox"/> <sub>2</sub> | <input type="checkbox"/> <sub>3</sub> | <input type="checkbox"/> <sub>0</sub> |
| 总胆红素 (TBIL)     | <input type="checkbox"/> <sub>1</sub> μmol/L <input type="checkbox"/> <sub>2</sub> 其他: ____ | <input type="checkbox"/> <sub>1</sub> | <input type="checkbox"/> <sub>2</sub> | <input type="checkbox"/> <sub>3</sub> | <input type="checkbox"/> <sub>0</sub> |
| 白蛋白 (ALB)       | <input type="checkbox"/> <sub>1</sub> g/L <input type="checkbox"/> <sub>2</sub> 其他: ____    | <input type="checkbox"/> <sub>1</sub> | <input type="checkbox"/> <sub>2</sub> | <input type="checkbox"/> <sub>3</sub> | <input type="checkbox"/> <sub>0</sub> |
| γ-谷氨酰转肽酶 (GGT)  | <input type="checkbox"/> <sub>1</sub> U/L <input type="checkbox"/> <sub>2</sub> 其他: ____    | <input type="checkbox"/> <sub>1</sub> | <input type="checkbox"/> <sub>2</sub> | <input type="checkbox"/> <sub>3</sub> | <input type="checkbox"/> <sub>0</sub> |
| 乳酸脱氢酶 (LDH)     | <input type="checkbox"/> <sub>1</sub> U/L <input type="checkbox"/> <sub>2</sub> 其他: ____    | <input type="checkbox"/> <sub>1</sub> | <input type="checkbox"/> <sub>2</sub> | <input type="checkbox"/> <sub>3</sub> | <input type="checkbox"/> <sub>0</sub> |
| 肌酸激酶 (CK)       | <input type="checkbox"/> <sub>1</sub> U/L <input type="checkbox"/> <sub>2</sub> 其他: ____    | <input type="checkbox"/> <sub>1</sub> | <input type="checkbox"/> <sub>2</sub> | <input type="checkbox"/> <sub>3</sub> | <input type="checkbox"/> <sub>0</sub> |
| 肌酸激酶同工酶 (CK-MB) | <input type="checkbox"/> <sub>1</sub> U/L <input type="checkbox"/> <sub>2</sub> 其他: ____    | <input type="checkbox"/> <sub>1</sub> | <input type="checkbox"/> <sub>2</sub> | <input type="checkbox"/> <sub>3</sub> | <input type="checkbox"/> <sub>0</sub> |
| 血尿素氮 (BUN)      | <input type="checkbox"/> <sub>1</sub> mmol/L <input type="checkbox"/> <sub>2</sub> 其他: ____ | <input type="checkbox"/> <sub>1</sub> | <input type="checkbox"/> <sub>2</sub> | <input type="checkbox"/> <sub>3</sub> | <input type="checkbox"/> <sub>0</sub> |
| 尿素 (Urea)       | <input type="checkbox"/> <sub>1</sub> mmol/L <input type="checkbox"/> <sub>2</sub> 其他: ____ | <input type="checkbox"/> <sub>1</sub> | <input type="checkbox"/> <sub>2</sub> | <input type="checkbox"/> <sub>3</sub> | <input type="checkbox"/> <sub>0</sub> |
| 血肌酐 (CR)        | <input type="checkbox"/> <sub>1</sub> μmol/L <input type="checkbox"/> <sub>2</sub> 其他: ____ | <input type="checkbox"/> <sub>1</sub> | <input type="checkbox"/> <sub>2</sub> | <input type="checkbox"/> <sub>3</sub> | <input type="checkbox"/> <sub>0</sub> |

| <b>凝血功能</b> <input type="checkbox"/> <sub>0</sub> 未查, 原因 _____ |                                                                                          |                                       |                                       |                                       |                                       |    |
|----------------------------------------------------------------|------------------------------------------------------------------------------------------|---------------------------------------|---------------------------------------|---------------------------------------|---------------------------------------|----|
| 采样日期:             年             月             日                |                                                                                          |                                       |                                       | 正常值范围编号:                              |                                       |    |
| 检查项目                                                           | 测量结果                                                                                     |                                       | 结果判定                                  |                                       |                                       | 未查 |
|                                                                | 实测值                                                                                      | 单位                                    | 正常                                    | 异常                                    |                                       |    |
|                                                                |                                                                                          |                                       |                                       | 无临床意义                                 | 有临床意义                                 |    |
| 凝血酶原时间 (PT)                                                    | <input type="checkbox"/> <sub>1</sub> S <input type="checkbox"/> <sub>2</sub> 其他: ____   | <input type="checkbox"/> <sub>1</sub> | <input type="checkbox"/> <sub>2</sub> | <input type="checkbox"/> <sub>3</sub> | <input type="checkbox"/> <sub>0</sub> |    |
| 活化部分凝血活酶时间 (APTT)                                              | <input type="checkbox"/> <sub>1</sub> S <input type="checkbox"/> <sub>2</sub> 其他: ____   | <input type="checkbox"/> <sub>1</sub> | <input type="checkbox"/> <sub>2</sub> | <input type="checkbox"/> <sub>3</sub> | <input type="checkbox"/> <sub>0</sub> |    |
| 凝血酶时间 (TT)                                                     | <input type="checkbox"/> <sub>1</sub> S <input type="checkbox"/> <sub>2</sub> 其他: ____   | <input type="checkbox"/> <sub>1</sub> | <input type="checkbox"/> <sub>2</sub> | <input type="checkbox"/> <sub>3</sub> | <input type="checkbox"/> <sub>0</sub> |    |
| 血浆纤维蛋白原 (Fbg)                                                  | <input type="checkbox"/> <sub>1</sub> g/L <input type="checkbox"/> <sub>2</sub> 其他: ____ | <input type="checkbox"/> <sub>1</sub> | <input type="checkbox"/> <sub>2</sub> | <input type="checkbox"/> <sub>3</sub> | <input type="checkbox"/> <sub>0</sub> |    |
| 国际标准化比率 (INR)                                                  | <input type="checkbox"/> <sub>1</sub> 不适用 <input type="checkbox"/> <sub>2</sub> 其他: ____ | <input type="checkbox"/> <sub>1</sub> | <input type="checkbox"/> <sub>2</sub> | <input type="checkbox"/> <sub>3</sub> | <input type="checkbox"/> <sub>0</sub> |    |

| <b>C 反应蛋白 (CRP)</b> <input type="checkbox"/> <sub>0</sub> 未查, 原因 _____ |                                                                                           |                                       |                                       |                                       |                                       |    |
|------------------------------------------------------------------------|-------------------------------------------------------------------------------------------|---------------------------------------|---------------------------------------|---------------------------------------|---------------------------------------|----|
| 采样日期:             年             月             日                        |                                                                                           |                                       |                                       | 正常值范围编号:                              |                                       |    |
| 检查项目                                                                   | 测量结果                                                                                      |                                       | 结果判定                                  |                                       |                                       | 未查 |
|                                                                        | 实测值                                                                                       | 单位                                    | 正常                                    | 异常                                    |                                       |    |
|                                                                        |                                                                                           |                                       |                                       | 无临床意义                                 | 有临床意义                                 |    |
| C 反应蛋白 (CRP)                                                           | <input type="checkbox"/> <sub>1</sub> mg/L <input type="checkbox"/> <sub>2</sub> 其他: ____ | <input type="checkbox"/> <sub>1</sub> | <input type="checkbox"/> <sub>2</sub> | <input type="checkbox"/> <sub>3</sub> | <input type="checkbox"/> <sub>0</sub> |    |

|                                                                    |  |  |  |          |  |  |
|--------------------------------------------------------------------|--|--|--|----------|--|--|
| <b>血沉 (ESR)</b> <input type="checkbox"/> <sub>0</sub> 未查, 原因 _____ |  |  |  |          |  |  |
| 采样日期:             年             月             日                    |  |  |  | 正常值范围编号: |  |  |

|                   |                                          |
|-------------------|------------------------------------------|
| 研究方案编号: KY2020-29 | 治疗期                                      |
| 研究中心编号            | 受试者筛选号                     访视 4 (D10±1d) |

| 检查项目     | 测量结果 |                                                                                            | 结果判定                                  |                                       |                                       |
|----------|------|--------------------------------------------------------------------------------------------|---------------------------------------|---------------------------------------|---------------------------------------|
|          | 实测值  | 单位                                                                                         | 正常                                    | 异常                                    |                                       |
| 血沉 (ESR) |      | <input type="checkbox"/> <sub>1</sub> mm/h <input type="checkbox"/> <sub>2</sub> 其他: _____ | <input type="checkbox"/> <sub>1</sub> | <input type="checkbox"/> <sub>2</sub> | <input type="checkbox"/> <sub>3</sub> |
|          |      |                                                                                            |                                       | 无临床意义                                 | 有临床意义                                 |

| TNF-α <input type="checkbox"/> <sub>0</sub> 未查, 原因 _____ |      |                                                                                             |                                       |                                       |                                       |
|----------------------------------------------------------|------|---------------------------------------------------------------------------------------------|---------------------------------------|---------------------------------------|---------------------------------------|
| 采样日期:             年             月             日          |      |                                                                                             | 正常值范围编号:                              |                                       |                                       |
| 检查项目                                                     | 测量结果 |                                                                                             | 结果判定                                  |                                       |                                       |
|                                                          | 实测值  | 单位                                                                                          | 正常                                    | 异常                                    |                                       |
| TNF-α                                                    |      | <input type="checkbox"/> <sub>1</sub> pg/mL <input type="checkbox"/> <sub>2</sub> 其他: _____ | <input type="checkbox"/> <sub>1</sub> | <input type="checkbox"/> <sub>2</sub> | <input type="checkbox"/> <sub>3</sub> |
|                                                          |      |                                                                                             |                                       | 无临床意义                                 | 有临床意义                                 |

| IL-6 <input type="checkbox"/> <sub>0</sub> 未查, 原因 _____ |      |                                                                                             |                                       |                                       |                                       |
|---------------------------------------------------------|------|---------------------------------------------------------------------------------------------|---------------------------------------|---------------------------------------|---------------------------------------|
| 采样日期:             年             月             日         |      |                                                                                             | 正常值范围编号:                              |                                       |                                       |
| 检查项目                                                    | 测量结果 |                                                                                             | 结果判定                                  |                                       |                                       |
|                                                         | 实测值  | 单位                                                                                          | 正常                                    | 异常                                    |                                       |
| IL-6                                                    |      | <input type="checkbox"/> <sub>1</sub> pg/mL <input type="checkbox"/> <sub>2</sub> 其他: _____ | <input type="checkbox"/> <sub>1</sub> | <input type="checkbox"/> <sub>2</sub> | <input type="checkbox"/> <sub>3</sub> |
|                                                         |      |                                                                                             |                                       | 无临床意义                                 | 有临床意义                                 |

|                                                               |                                                                                                                                                                                                                                           |
|---------------------------------------------------------------|-------------------------------------------------------------------------------------------------------------------------------------------------------------------------------------------------------------------------------------------|
| 新型冠状病毒核酸检测 <input type="checkbox"/> <sub>0</sub> 未查, 原因 _____ |                                                                                                                                                                                                                                           |
| 采样部位 (可多选)                                                    | <input type="checkbox"/> <sub>0</sub> 上呼吸道 <input type="checkbox"/> <sub>1</sub> 下呼吸道                                                                                                                                                     |
| 上呼吸道                                                          | 采样日期:             年             月             日<br>检查结果: <input type="checkbox"/> <sub>1</sub> 阴性 <input type="checkbox"/> <sub>2</sub> 阳性 <input type="checkbox"/> <sub>3</sub> 无法判断 <input type="checkbox"/> <sub>4</sub> 其他, 请描述 _____ |
| 下呼吸道                                                          | 采样日期:             年             月             日<br>检查结果: <input type="checkbox"/> <sub>1</sub> 阴性 <input type="checkbox"/> <sub>2</sub> 阳性 <input type="checkbox"/> <sub>3</sub> 无法判断 <input type="checkbox"/> <sub>4</sub> 其他, 请描述 _____ |
| 结果判定                                                          | <input type="checkbox"/> <sub>1</sub> 阴性 <input type="checkbox"/> <sub>2</sub> 阳性 <input type="checkbox"/> <sub>3</sub> 无法判断 <input type="checkbox"/> <sub>4</sub> 其他, 请描述 _____                                                          |

|                                                                    |  |
|--------------------------------------------------------------------|--|
| 指脉氧饱和度 (不吸氧情况下) <input type="checkbox"/> <sub>0</sub> 未查, 原因 _____ |  |
| 检查日期:             年             月             日                    |  |
| 实测值: _____ % (静息状态)                                                |  |

|                                                                                                                          |  |
|--------------------------------------------------------------------------------------------------------------------------|--|
| 动脉血气分析 <input type="checkbox"/> <sub>0</sub> 未查, 原因 _____<br><input type="checkbox"/> <sub>1</sub> 不适用                   |  |
| 是否吸氧: <input type="checkbox"/> <sub>0</sub> 否 <input type="checkbox"/> <sub>1</sub> 是, 吸氧浓度 (FiO <sub>2</sub> ): _____ % |  |
| 采样日期:             年             月             日                                                                          |  |
| 正常值范围编号:                                                                                                                 |  |

|                   |            |
|-------------------|------------|
| 研究方案编号: KY2020-29 | 治疗期        |
| 研究中心编号  __        | 受试者筛选号  __ |
| 访视 4 (D10±1d)     |            |

| 检查项目                       | 测量结果 |                                                                                           | 结果判定                                  |                                       |                                       | 未查                                    |
|----------------------------|------|-------------------------------------------------------------------------------------------|---------------------------------------|---------------------------------------|---------------------------------------|---------------------------------------|
|                            | 实测值  | 单位                                                                                        | 正常                                    | 异常                                    |                                       |                                       |
|                            |      |                                                                                           |                                       | 无临床意义                                 | 有临床意义                                 |                                       |
| 动脉血氧分压 (PaO <sub>2</sub> ) |      | <input type="checkbox"/> <sub>1</sub> mmHg <input type="checkbox"/> <sub>2</sub> 其他: ____ | <input type="checkbox"/> <sub>1</sub> | <input type="checkbox"/> <sub>2</sub> | <input type="checkbox"/> <sub>3</sub> | <input type="checkbox"/> <sub>0</sub> |
| 血氧饱和度 (SaO <sub>2</sub> )  |      | <input type="checkbox"/> <sub>1</sub> % <input type="checkbox"/> <sub>2</sub> 其他: ____    | <input type="checkbox"/> <sub>1</sub> | <input type="checkbox"/> <sub>2</sub> | <input type="checkbox"/> <sub>3</sub> | <input type="checkbox"/> <sub>0</sub> |

自上次访视以来,受试者如有不良事件发生,请填写“不良事件”表;如有合并药物治疗,请填写“既往/合并药物治疗”表;如有合并非药物治疗,请填写“既往/合并非药物治疗”表;如有计划外检查,请填写“计划外检查”表。如有 IMV/NIV、ECMO、HFNC、氧疗,请填写在“IMV/NIV、ECMO、HFNC、氧疗”表中。

|                   |                     |
|-------------------|---------------------|
| 研究方案编号: KY2020-29 | 治疗期                 |
| 研究中心编号  __        | 受试者筛选号  __ __ __ __ |
| 访视 5 (D14±1d)     |                     |

本次访视日期: |\_\_|\_\_|\_\_|年|\_\_|\_\_|月|\_\_|\_\_|日

|                                           |                                     |      |                                                                                                                                                                                                                                                                    |
|-------------------------------------------|-------------------------------------|------|--------------------------------------------------------------------------------------------------------------------------------------------------------------------------------------------------------------------------------------------------------------------|
| 生命体征 <input type="checkbox"/> 未查, 原因_____ |                                     |      |                                                                                                                                                                                                                                                                    |
| 检查日期                                      | __ __ __ 年 __ __ 月 __ __ 日          |      |                                                                                                                                                                                                                                                                    |
| 日最高体温                                     | __ __ . __ °C                       | 测量方式 | <input type="checkbox"/> <sub>1</sub> 腋下 <input type="checkbox"/> <sub>2</sub> 口腔 <input type="checkbox"/> <sub>3</sub> 肛门<br><input type="checkbox"/> <sub>4</sub> 耳朵 <input type="checkbox"/> <sub>5</sub> 未知 <input type="checkbox"/> <sub>6</sub> 其他, 请描述_____ |
| 呼吸频率                                      | __ __ 次/分                           | 脉搏   | __ __ __ 次/分                                                                                                                                                                                                                                                       |
| 血压                                        | __ __ __ / __ __ __  mmHg (收缩压/舒张压) |      |                                                                                                                                                                                                                                                                    |

|                                                                                                         |                            |
|---------------------------------------------------------------------------------------------------------|----------------------------|
| 有无呼吸道症状 <input type="checkbox"/> 未查, 原因_____                                                            |                            |
| 检查日期:                                                                                                   | __ __ __ 年 __ __ 月 __ __ 日 |
| 受试者有无呼吸道症状: <input type="checkbox"/> <sub>0</sub> 无 <input type="checkbox"/> <sub>1</sub> 有, 请描述: _____ |                            |

| 血常规 <input type="checkbox"/> 未查, 原因_____ |                                                                                                           |    |                                       |                                       |                                       |                                       |
|------------------------------------------|-----------------------------------------------------------------------------------------------------------|----|---------------------------------------|---------------------------------------|---------------------------------------|---------------------------------------|
| 采样日期:  __ __ __ 年 __ __ 月 __ __ 日        |                                                                                                           |    | 正常值范围编号:  __ __ __                    |                                       |                                       |                                       |
| 检查项目                                     | 测量结果                                                                                                      |    | 结果判定                                  |                                       |                                       | 未查                                    |
|                                          | 实测值                                                                                                       | 单位 | 正常                                    | 异常                                    |                                       |                                       |
|                                          |                                                                                                           |    |                                       | 无临床意义                                 | 有临床意义                                 |                                       |
| 红细胞计数 (RBC)                              | <input type="checkbox"/> <sub>1</sub> 10 <sup>12</sup> /L <input type="checkbox"/> <sub>2</sub> 其他: _____ |    | <input type="checkbox"/> <sub>1</sub> | <input type="checkbox"/> <sub>2</sub> | <input type="checkbox"/> <sub>3</sub> | <input type="checkbox"/> <sub>0</sub> |
| 白细胞计数 (WBC)                              | <input type="checkbox"/> <sub>1</sub> 10 <sup>9</sup> /L <input type="checkbox"/> <sub>2</sub> 其他: _____  |    | <input type="checkbox"/> <sub>1</sub> | <input type="checkbox"/> <sub>2</sub> | <input type="checkbox"/> <sub>3</sub> | <input type="checkbox"/> <sub>0</sub> |
| 血红蛋白 (Hb)                                | <input type="checkbox"/> <sub>1</sub> g/L <input type="checkbox"/> <sub>2</sub> 其他: _____                 |    | <input type="checkbox"/> <sub>1</sub> | <input type="checkbox"/> <sub>2</sub> | <input type="checkbox"/> <sub>3</sub> | <input type="checkbox"/> <sub>0</sub> |
| 血小板计数 (PLT)                              | <input type="checkbox"/> <sub>1</sub> 10 <sup>9</sup> /L <input type="checkbox"/> <sub>2</sub> 其他: _____  |    | <input type="checkbox"/> <sub>1</sub> | <input type="checkbox"/> <sub>2</sub> | <input type="checkbox"/> <sub>3</sub> | <input type="checkbox"/> <sub>0</sub> |
| 中性粒细胞计数 (ANC)                            | <input type="checkbox"/> <sub>1</sub> 10 <sup>9</sup> /L <input type="checkbox"/> <sub>2</sub> 其他: _____  |    | <input type="checkbox"/> <sub>1</sub> | <input type="checkbox"/> <sub>2</sub> | <input type="checkbox"/> <sub>3</sub> | <input type="checkbox"/> <sub>0</sub> |
| 淋巴细胞计数 (LY)                              | <input type="checkbox"/> <sub>1</sub> 10 <sup>9</sup> /L <input type="checkbox"/> <sub>2</sub> 其他: _____  |    | <input type="checkbox"/> <sub>1</sub> | <input type="checkbox"/> <sub>2</sub> | <input type="checkbox"/> <sub>3</sub> | <input type="checkbox"/> <sub>0</sub> |
| 单核细胞计数 (MO)                              | <input type="checkbox"/> <sub>1</sub> 10 <sup>9</sup> /L <input type="checkbox"/> <sub>2</sub> 其他: _____  |    | <input type="checkbox"/> <sub>1</sub> | <input type="checkbox"/> <sub>2</sub> | <input type="checkbox"/> <sub>3</sub> | <input type="checkbox"/> <sub>0</sub> |
| 嗜酸性粒细胞计数 (EO)                            | <input type="checkbox"/> <sub>1</sub> 10 <sup>9</sup> /L <input type="checkbox"/> <sub>2</sub> 其他: _____  |    | <input type="checkbox"/> <sub>1</sub> | <input type="checkbox"/> <sub>2</sub> | <input type="checkbox"/> <sub>3</sub> | <input type="checkbox"/> <sub>0</sub> |
| 嗜碱性粒细胞计数 (BA)                            | <input type="checkbox"/> <sub>1</sub> 10 <sup>9</sup> /L <input type="checkbox"/> <sub>2</sub> 其他: _____  |    | <input type="checkbox"/> <sub>1</sub> | <input type="checkbox"/> <sub>2</sub> | <input type="checkbox"/> <sub>3</sub> | <input type="checkbox"/> <sub>0</sub> |

| 血生化 <input type="checkbox"/> 未查, 原因_____ |      |    |                    |       |       |    |
|------------------------------------------|------|----|--------------------|-------|-------|----|
| 采样日期:  __ __ __ 年 __ __ 月 __ __ 日        |      |    | 正常值范围编号:  __ __ __ |       |       |    |
| 检查项目                                     | 测量结果 |    | 结果判定               |       |       | 未查 |
|                                          | 实测值  | 单位 | 正常                 | 异常    |       |    |
|                                          |      |    |                    | 无临床意义 | 有临床意义 |    |



|                   |                     |
|-------------------|---------------------|
| 研究方案编号: KY2020-29 | 治疗期                 |
| 研究中心编号  __        | 受试者筛选号  __ __ __ __ |
| 访视 5 (D14±1d)     |                     |

|                 |                                                                                             |                                       |                                       |                                       |                                       |
|-----------------|---------------------------------------------------------------------------------------------|---------------------------------------|---------------------------------------|---------------------------------------|---------------------------------------|
| 谷丙转氨酶 (ALT)     | <input type="checkbox"/> <sub>1</sub> U/L <input type="checkbox"/> <sub>2</sub> 其他: ____    | <input type="checkbox"/> <sub>1</sub> | <input type="checkbox"/> <sub>2</sub> | <input type="checkbox"/> <sub>3</sub> | <input type="checkbox"/> <sub>0</sub> |
| 谷草转氨酶 (AST)     | <input type="checkbox"/> <sub>1</sub> U/L <input type="checkbox"/> <sub>2</sub> 其他: ____    | <input type="checkbox"/> <sub>1</sub> | <input type="checkbox"/> <sub>2</sub> | <input type="checkbox"/> <sub>3</sub> | <input type="checkbox"/> <sub>0</sub> |
| 总胆红素 (TBIL)     | <input type="checkbox"/> <sub>1</sub> μmol/L <input type="checkbox"/> <sub>2</sub> 其他: ____ | <input type="checkbox"/> <sub>1</sub> | <input type="checkbox"/> <sub>2</sub> | <input type="checkbox"/> <sub>3</sub> | <input type="checkbox"/> <sub>0</sub> |
| 白蛋白 (ALB)       | <input type="checkbox"/> <sub>1</sub> g/L <input type="checkbox"/> <sub>2</sub> 其他: ____    | <input type="checkbox"/> <sub>1</sub> | <input type="checkbox"/> <sub>2</sub> | <input type="checkbox"/> <sub>3</sub> | <input type="checkbox"/> <sub>0</sub> |
| γ-谷氨酰转肽酶 (GGT)  | <input type="checkbox"/> <sub>1</sub> U/L <input type="checkbox"/> <sub>2</sub> 其他: ____    | <input type="checkbox"/> <sub>1</sub> | <input type="checkbox"/> <sub>2</sub> | <input type="checkbox"/> <sub>3</sub> | <input type="checkbox"/> <sub>0</sub> |
| 乳酸脱氢酶 (LDH)     | <input type="checkbox"/> <sub>1</sub> U/L <input type="checkbox"/> <sub>2</sub> 其他: ____    | <input type="checkbox"/> <sub>1</sub> | <input type="checkbox"/> <sub>2</sub> | <input type="checkbox"/> <sub>3</sub> | <input type="checkbox"/> <sub>0</sub> |
| 肌酸激酶 (CK)       | <input type="checkbox"/> <sub>1</sub> U/L <input type="checkbox"/> <sub>2</sub> 其他: ____    | <input type="checkbox"/> <sub>1</sub> | <input type="checkbox"/> <sub>2</sub> | <input type="checkbox"/> <sub>3</sub> | <input type="checkbox"/> <sub>0</sub> |
| 肌酸激酶同工酶 (CK-MB) | <input type="checkbox"/> <sub>1</sub> U/L <input type="checkbox"/> <sub>2</sub> 其他: ____    | <input type="checkbox"/> <sub>1</sub> | <input type="checkbox"/> <sub>2</sub> | <input type="checkbox"/> <sub>3</sub> | <input type="checkbox"/> <sub>0</sub> |
| 血尿素氮 (BUN)      | <input type="checkbox"/> <sub>1</sub> mmol/L <input type="checkbox"/> <sub>2</sub> 其他: ____ | <input type="checkbox"/> <sub>1</sub> | <input type="checkbox"/> <sub>2</sub> | <input type="checkbox"/> <sub>3</sub> | <input type="checkbox"/> <sub>0</sub> |
| 尿素 (Urea)       | <input type="checkbox"/> <sub>1</sub> mmol/L <input type="checkbox"/> <sub>2</sub> 其他: ____ | <input type="checkbox"/> <sub>1</sub> | <input type="checkbox"/> <sub>2</sub> | <input type="checkbox"/> <sub>3</sub> | <input type="checkbox"/> <sub>0</sub> |
| 血肌酐 (CR)        | <input type="checkbox"/> <sub>1</sub> μmol/L <input type="checkbox"/> <sub>2</sub> 其他: ____ | <input type="checkbox"/> <sub>1</sub> | <input type="checkbox"/> <sub>2</sub> | <input type="checkbox"/> <sub>3</sub> | <input type="checkbox"/> <sub>0</sub> |

| 凝血功能 <input type="checkbox"/> <sub>0</sub> 未查, 原因 _____ |                                                                                          |    |                                       |                                       |                                       |                                       |
|---------------------------------------------------------|------------------------------------------------------------------------------------------|----|---------------------------------------|---------------------------------------|---------------------------------------|---------------------------------------|
| 采样日期:  __ __ __ 年 __ __ 月 __ __ 日                       |                                                                                          |    |                                       | 正常值范围编号:  __ __ __                    |                                       |                                       |
| 检查项目                                                    | 测量结果                                                                                     |    | 结果判定                                  |                                       |                                       | 未查                                    |
|                                                         | 实测值                                                                                      | 单位 | 正常                                    | 异常                                    |                                       |                                       |
|                                                         |                                                                                          |    |                                       | 无临床意义                                 | 有临床意义                                 |                                       |
| 凝血酶原时间 (PT)                                             | <input type="checkbox"/> <sub>1</sub> S <input type="checkbox"/> <sub>2</sub> 其他: ____   |    | <input type="checkbox"/> <sub>1</sub> | <input type="checkbox"/> <sub>2</sub> | <input type="checkbox"/> <sub>3</sub> | <input type="checkbox"/> <sub>0</sub> |
| 活化部分凝血活酶时间 (APTT)                                       | <input type="checkbox"/> <sub>1</sub> S <input type="checkbox"/> <sub>2</sub> 其他: ____   |    | <input type="checkbox"/> <sub>1</sub> | <input type="checkbox"/> <sub>2</sub> | <input type="checkbox"/> <sub>3</sub> | <input type="checkbox"/> <sub>0</sub> |
| 凝血酶时间 (TT)                                              | <input type="checkbox"/> <sub>1</sub> S <input type="checkbox"/> <sub>2</sub> 其他: ____   |    | <input type="checkbox"/> <sub>1</sub> | <input type="checkbox"/> <sub>2</sub> | <input type="checkbox"/> <sub>3</sub> | <input type="checkbox"/> <sub>0</sub> |
| 血浆纤维蛋白原 (Fbg)                                           | <input type="checkbox"/> <sub>1</sub> g/L <input type="checkbox"/> <sub>2</sub> 其他: ____ |    | <input type="checkbox"/> <sub>1</sub> | <input type="checkbox"/> <sub>2</sub> | <input type="checkbox"/> <sub>3</sub> | <input type="checkbox"/> <sub>0</sub> |
| 国际标准化比率 (INR)                                           | <input type="checkbox"/> <sub>1</sub> 不适用 <input type="checkbox"/> <sub>2</sub> 其他: ____ |    | <input type="checkbox"/> <sub>1</sub> | <input type="checkbox"/> <sub>2</sub> | <input type="checkbox"/> <sub>3</sub> | <input type="checkbox"/> <sub>0</sub> |

| C 反应蛋白 (CRP) <input type="checkbox"/> <sub>0</sub> 未查, 原因 _____ |                                                                                           |    |                                       |                                       |                                       |  |
|-----------------------------------------------------------------|-------------------------------------------------------------------------------------------|----|---------------------------------------|---------------------------------------|---------------------------------------|--|
| 采样日期:  __ __ __ 年 __ __ 月 __ __ 日                               |                                                                                           |    |                                       | 正常值范围编号:  __ __ __                    |                                       |  |
| 检查项目                                                            | 测量结果                                                                                      |    | 结果判定                                  |                                       |                                       |  |
|                                                                 | 实测值                                                                                       | 单位 | 正常                                    | 异常                                    |                                       |  |
|                                                                 |                                                                                           |    |                                       | 无临床意义                                 | 有临床意义                                 |  |
| C 反应蛋白 (CRP)                                                    | <input type="checkbox"/> <sub>1</sub> mg/L <input type="checkbox"/> <sub>2</sub> 其他: ____ |    | <input type="checkbox"/> <sub>1</sub> | <input type="checkbox"/> <sub>2</sub> | <input type="checkbox"/> <sub>3</sub> |  |

| 血沉 (ESR) <input type="checkbox"/> <sub>0</sub> 未查, 原因 _____ |      |    |      |                    |  |  |
|-------------------------------------------------------------|------|----|------|--------------------|--|--|
| 采样日期:  __ __ __ 年 __ __ 月 __ __ 日                           |      |    |      | 正常值范围编号:  __ __ __ |  |  |
| 检查项目                                                        | 测量结果 |    | 结果判定 |                    |  |  |
|                                                             | 实测值  | 单位 | 正常   | 异常                 |  |  |
|                                                             |      |    |      |                    |  |  |

|                   |                                          |
|-------------------|------------------------------------------|
| 研究方案编号: KY2020-29 | 治疗期                                      |
| 研究中心编号            | 受试者筛选号                     访视 5 (D14±1d) |

|          |                                            |                                                 |                                       |                                       |                                       |
|----------|--------------------------------------------|-------------------------------------------------|---------------------------------------|---------------------------------------|---------------------------------------|
| 血沉 (ESR) |                                            |                                                 |                                       | 无临床意义                                 | 有临床意义                                 |
|          | <input type="checkbox"/> <sub>1</sub> mm/h | <input type="checkbox"/> <sub>2</sub> 其他: _____ | <input type="checkbox"/> <sub>1</sub> | <input type="checkbox"/> <sub>2</sub> | <input type="checkbox"/> <sub>3</sub> |

|                                                                 |      |                                                                                             |                                       |                                       |                                       |
|-----------------------------------------------------------------|------|---------------------------------------------------------------------------------------------|---------------------------------------|---------------------------------------|---------------------------------------|
| <b>TNF-α</b> <input type="checkbox"/> <sub>0</sub> 未查, 原因 _____ |      |                                                                                             |                                       |                                       |                                       |
| 采样日期:             年             月             日                 |      |                                                                                             | 正常值范围编号:                              |                                       |                                       |
| 检查项目                                                            | 测量结果 |                                                                                             | 结果判定                                  |                                       |                                       |
| TNF-α                                                           | 实测值  | 单位                                                                                          | 正常                                    | 异常                                    |                                       |
|                                                                 |      | <input type="checkbox"/> <sub>1</sub> pg/mL <input type="checkbox"/> <sub>2</sub> 其他: _____ |                                       | <input type="checkbox"/> <sub>1</sub> | 无临床意义                                 |
|                                                                 |      |                                                                                             | <input type="checkbox"/> <sub>1</sub> | <input type="checkbox"/> <sub>2</sub> | <input type="checkbox"/> <sub>3</sub> |

|                                                                |      |                                                                                             |                                       |                                       |                                       |
|----------------------------------------------------------------|------|---------------------------------------------------------------------------------------------|---------------------------------------|---------------------------------------|---------------------------------------|
| <b>IL-6</b> <input type="checkbox"/> <sub>0</sub> 未查, 原因 _____ |      |                                                                                             |                                       |                                       |                                       |
| 采样日期:             年             月             日                |      |                                                                                             | 正常值范围编号:                              |                                       |                                       |
| 检查项目                                                           | 测量结果 |                                                                                             | 结果判定                                  |                                       |                                       |
| IL-6                                                           | 实测值  | 单位                                                                                          | 正常                                    | 异常                                    |                                       |
|                                                                |      | <input type="checkbox"/> <sub>1</sub> pg/mL <input type="checkbox"/> <sub>2</sub> 其他: _____ |                                       | <input type="checkbox"/> <sub>1</sub> | 无临床意义                                 |
|                                                                |      |                                                                                             | <input type="checkbox"/> <sub>1</sub> | <input type="checkbox"/> <sub>2</sub> | <input type="checkbox"/> <sub>3</sub> |

|                                                                      |                                                                                                                                                                                                                                           |
|----------------------------------------------------------------------|-------------------------------------------------------------------------------------------------------------------------------------------------------------------------------------------------------------------------------------------|
| <b>新型冠状病毒核酸检测</b> <input type="checkbox"/> <sub>0</sub> 未查, 原因 _____ |                                                                                                                                                                                                                                           |
| 采样部位 (可多选)                                                           | <input type="checkbox"/> <sub>0</sub> 上呼吸道 <input type="checkbox"/> <sub>1</sub> 下呼吸道                                                                                                                                                     |
| 上呼吸道                                                                 | 采样日期:             年             月             日<br>检查结果: <input type="checkbox"/> <sub>1</sub> 阴性 <input type="checkbox"/> <sub>2</sub> 阳性 <input type="checkbox"/> <sub>3</sub> 无法判断 <input type="checkbox"/> <sub>4</sub> 其他, 请描述 _____ |
| 下呼吸道                                                                 | 采样日期:             年             月             日<br>检查结果: <input type="checkbox"/> <sub>1</sub> 阴性 <input type="checkbox"/> <sub>2</sub> 阳性 <input type="checkbox"/> <sub>3</sub> 无法判断 <input type="checkbox"/> <sub>4</sub> 其他, 请描述 _____ |
| 结果判定                                                                 | <input type="checkbox"/> <sub>1</sub> 阴性 <input type="checkbox"/> <sub>2</sub> 阳性 <input type="checkbox"/> <sub>3</sub> 无法判断 <input type="checkbox"/> <sub>4</sub> 其他, 请描述 _____                                                          |

|                                                                           |  |
|---------------------------------------------------------------------------|--|
| <b>指脉氧饱和度 (不吸氧情况下)</b> <input type="checkbox"/> <sub>0</sub> 未查, 原因 _____ |  |
| 检查日期:             年             月             日                           |  |
| 实测值: _____ % (静息状态)                                                       |  |

|                                                                                                                          |      |          |    |
|--------------------------------------------------------------------------------------------------------------------------|------|----------|----|
| <b>动脉血气分析</b> <input type="checkbox"/> <sub>0</sub> 未查, 原因 _____<br><input type="checkbox"/> <sub>1</sub> 不适用            |      |          |    |
| 是否吸氧: <input type="checkbox"/> <sub>0</sub> 否 <input type="checkbox"/> <sub>1</sub> 是, 吸氧浓度 (FiO <sub>2</sub> ): _____ % |      |          |    |
| 采样日期:             年             月             日                                                                          |      | 正常值范围编号: |    |
| 检查项目                                                                                                                     | 测量结果 | 结果判定     | 未查 |

|                             |                                           |
|-----------------------------|-------------------------------------------|
| 研究方案编号: KY2020-29           | 治疗期                                       |
| 研究中心编号 <input type="text"/> | 受试者筛选号 <input type="text"/> 访视 5 (D14±1d) |

|                            | 实测值 | 单位                                                                                         | 正常                                    | 异常                                    |                                       |                                       |
|----------------------------|-----|--------------------------------------------------------------------------------------------|---------------------------------------|---------------------------------------|---------------------------------------|---------------------------------------|
|                            |     |                                                                                            |                                       | 无临床意义                                 | 有临床意义                                 |                                       |
| 动脉血氧分压 (PaO <sub>2</sub> ) |     | <input type="checkbox"/> <sub>1</sub> mmHg <input type="checkbox"/> <sub>2</sub> 其他: _____ | <input type="checkbox"/> <sub>1</sub> | <input type="checkbox"/> <sub>2</sub> | <input type="checkbox"/> <sub>3</sub> | <input type="checkbox"/> <sub>0</sub> |
| 血氧饱和度 (SaO <sub>2</sub> )  |     | <input type="checkbox"/> <sub>1</sub> % <input type="checkbox"/> <sub>2</sub> 其他: _____    | <input type="checkbox"/> <sub>1</sub> | <input type="checkbox"/> <sub>2</sub> | <input type="checkbox"/> <sub>3</sub> | <input type="checkbox"/> <sub>0</sub> |

|                                                          |                                                                                                                                                                                                                                                                                                                                                                                              |
|----------------------------------------------------------|----------------------------------------------------------------------------------------------------------------------------------------------------------------------------------------------------------------------------------------------------------------------------------------------------------------------------------------------------------------------------------------------|
| 临床状态 <input type="checkbox"/> <sub>0</sub> 未评价, 原因 _____ |                                                                                                                                                                                                                                                                                                                                                                                              |
| 评价日期                                                     | <input type="text"/> 年 <input type="text"/> 月 <input type="text"/> 日                                                                                                                                                                                                                                                                                                                         |
| 评价结果                                                     | <input type="checkbox"/> <sub>1</sub> 1级: 出院<br><input type="checkbox"/> <sub>2</sub> 2级: 住院, 不需要氧疗<br><input type="checkbox"/> <sub>3</sub> 3级: 住院, 需要氧疗 (非NIV/HFNC)<br><input type="checkbox"/> <sub>4</sub> 4级: ICU/住院, 需要无创机械通气 (NIV) /高流量鼻导管氧疗 (HFNC)<br><input type="checkbox"/> <sub>5</sub> 5级: ICU, 需要体外膜肺氧合 (ECMO) 和/或有创机械通气 (IMV)<br><input type="checkbox"/> <sub>6</sub> 6级: 死亡 |

自上次访视以来, 受试者如有不良事件发生, 请填写“不良事件”表; 如有合并药物治疗, 请填写“既往/合并药物治疗”表; 如有合并非药物治疗, 请填写“既往/合并非药物治疗”表; 如有计划外检查, 请填写“计划外检查”表。如有 IMV/NIV、ECMO、HFNC、氧疗, 请填写在“IMV/NIV、ECMO、HFNC、氧疗”表中。

|                   |                     |
|-------------------|---------------------|
| 研究方案编号: KY2020-29 | 治疗期                 |
| 研究中心编号  __        | 受试者筛选号  __ __ __ __ |
| 访视 6 (D21±2d)     |                     |

本次访视日期: |\_\_|\_\_|\_\_|年|\_\_|\_\_|月|\_\_|\_\_|日

|                                            |                                     |      |                                                                                                                                                                                                                                                                     |
|--------------------------------------------|-------------------------------------|------|---------------------------------------------------------------------------------------------------------------------------------------------------------------------------------------------------------------------------------------------------------------------|
| 生命体征 <input type="checkbox"/> 未查, 原因 _____ |                                     |      |                                                                                                                                                                                                                                                                     |
| 检查日期                                       | __ __ __ 年 __ __ 月 __ __ 日          |      |                                                                                                                                                                                                                                                                     |
| 日最高体温                                      | __ __ . __ °C                       | 测量方式 | <input type="checkbox"/> <sub>1</sub> 腋下 <input type="checkbox"/> <sub>2</sub> 口腔 <input type="checkbox"/> <sub>3</sub> 肛门<br><input type="checkbox"/> <sub>4</sub> 耳朵 <input type="checkbox"/> <sub>5</sub> 未知 <input type="checkbox"/> <sub>6</sub> 其他, 请描述 _____ |
| 呼吸频率                                       | __ __ 次/分                           | 脉搏   | __ __ __ 次/分                                                                                                                                                                                                                                                        |
| 血压                                         | __ __ __ / __ __ __  mmHg (收缩压/舒张压) |      |                                                                                                                                                                                                                                                                     |

| 体格检查 <input type="checkbox"/> 未查, 原因 _____ |                                       |                                       |                                       |                                       |       |
|--------------------------------------------|---------------------------------------|---------------------------------------|---------------------------------------|---------------------------------------|-------|
| 检查日期:  __ __ __ 年 __ __ 月 __ __ 日          |                                       |                                       |                                       |                                       |       |
| 检查部位                                       | 检查结果                                  |                                       |                                       |                                       | 异常请描述 |
|                                            | 1=正常                                  | 2=异常无临床意义                             | 3=异常有临床意义                             | 0=未查                                  |       |
| 整体外观                                       | <input type="checkbox"/> <sub>1</sub> | <input type="checkbox"/> <sub>2</sub> | <input type="checkbox"/> <sub>3</sub> | <input type="checkbox"/> <sub>0</sub> |       |
| 头                                          | <input type="checkbox"/> <sub>1</sub> | <input type="checkbox"/> <sub>2</sub> | <input type="checkbox"/> <sub>3</sub> | <input type="checkbox"/> <sub>0</sub> |       |
| 眼                                          | <input type="checkbox"/> <sub>1</sub> | <input type="checkbox"/> <sub>2</sub> | <input type="checkbox"/> <sub>3</sub> | <input type="checkbox"/> <sub>0</sub> |       |
| 耳                                          | <input type="checkbox"/> <sub>1</sub> | <input type="checkbox"/> <sub>2</sub> | <input type="checkbox"/> <sub>3</sub> | <input type="checkbox"/> <sub>0</sub> |       |
| 鼻                                          | <input type="checkbox"/> <sub>1</sub> | <input type="checkbox"/> <sub>2</sub> | <input type="checkbox"/> <sub>3</sub> | <input type="checkbox"/> <sub>0</sub> |       |
| 喉                                          | <input type="checkbox"/> <sub>1</sub> | <input type="checkbox"/> <sub>2</sub> | <input type="checkbox"/> <sub>3</sub> | <input type="checkbox"/> <sub>0</sub> |       |
| 颈部及甲状腺                                     | <input type="checkbox"/> <sub>1</sub> | <input type="checkbox"/> <sub>2</sub> | <input type="checkbox"/> <sub>3</sub> | <input type="checkbox"/> <sub>0</sub> |       |
| 皮肤                                         | <input type="checkbox"/> <sub>1</sub> | <input type="checkbox"/> <sub>2</sub> | <input type="checkbox"/> <sub>3</sub> | <input type="checkbox"/> <sub>0</sub> |       |
| 心血管系统                                      | <input type="checkbox"/> <sub>1</sub> | <input type="checkbox"/> <sub>2</sub> | <input type="checkbox"/> <sub>3</sub> | <input type="checkbox"/> <sub>0</sub> |       |
| 胸部及肺                                       | <input type="checkbox"/> <sub>1</sub> | <input type="checkbox"/> <sub>2</sub> | <input type="checkbox"/> <sub>3</sub> | <input type="checkbox"/> <sub>0</sub> |       |
| 腹部                                         | <input type="checkbox"/> <sub>1</sub> | <input type="checkbox"/> <sub>2</sub> | <input type="checkbox"/> <sub>3</sub> | <input type="checkbox"/> <sub>0</sub> |       |
| 神经系统                                       | <input type="checkbox"/> <sub>1</sub> | <input type="checkbox"/> <sub>2</sub> | <input type="checkbox"/> <sub>3</sub> | <input type="checkbox"/> <sub>0</sub> |       |
| 骨骼肌系统                                      | <input type="checkbox"/> <sub>1</sub> | <input type="checkbox"/> <sub>2</sub> | <input type="checkbox"/> <sub>3</sub> | <input type="checkbox"/> <sub>0</sub> |       |
| 淋巴系统                                       | <input type="checkbox"/> <sub>1</sub> | <input type="checkbox"/> <sub>2</sub> | <input type="checkbox"/> <sub>3</sub> | <input type="checkbox"/> <sub>0</sub> |       |



|                   |                    |
|-------------------|--------------------|
| 研究方案编号: KY2020-29 | 治疗期                |
| 研究中心编号  __ _      | 受试者筛选号  __ _ _ _ _ |
| 访视 6 (D21±2d)     |                    |

|            |                                                                                             |                                       |                                       |                                       |                                       |
|------------|---------------------------------------------------------------------------------------------|---------------------------------------|---------------------------------------|---------------------------------------|---------------------------------------|
| 血尿素氮 (BUN) | <input type="checkbox"/> <sub>1</sub> mmol/L <input type="checkbox"/> <sub>2</sub> 其他: ____ | <input type="checkbox"/> <sub>1</sub> | <input type="checkbox"/> <sub>2</sub> | <input type="checkbox"/> <sub>3</sub> | <input type="checkbox"/> <sub>0</sub> |
| 尿素 (Urea)  | <input type="checkbox"/> <sub>1</sub> mmol/L <input type="checkbox"/> <sub>2</sub> 其他: ____ | <input type="checkbox"/> <sub>1</sub> | <input type="checkbox"/> <sub>2</sub> | <input type="checkbox"/> <sub>3</sub> | <input type="checkbox"/> <sub>0</sub> |
| 血肌酐 (CR)   | <input type="checkbox"/> <sub>1</sub> μmol/L <input type="checkbox"/> <sub>2</sub> 其他: ____ | <input type="checkbox"/> <sub>1</sub> | <input type="checkbox"/> <sub>2</sub> | <input type="checkbox"/> <sub>3</sub> | <input type="checkbox"/> <sub>0</sub> |

| 尿常规 <input type="checkbox"/> <sub>0</sub> 未查, 原因 _____ |                                                                                             |    |                                       |                                       |                                       |                                       |
|--------------------------------------------------------|---------------------------------------------------------------------------------------------|----|---------------------------------------|---------------------------------------|---------------------------------------|---------------------------------------|
| 采样日期:  __ _ _ _ 年 __ _ 月 __ _ 日                        |                                                                                             |    |                                       | 正常值范围编号:  __ _ _ _                    |                                       |                                       |
| 检查项目                                                   | 测量结果                                                                                        |    | 结果判定                                  |                                       |                                       | 未查                                    |
|                                                        | 实测值                                                                                         | 单位 | 正常                                    | 异常                                    |                                       |                                       |
|                                                        |                                                                                             |    |                                       | 无临床意义                                 | 有临床意义                                 |                                       |
| 尿蛋白                                                    | <input type="checkbox"/> <sub>1</sub> 不适用 <input type="checkbox"/> <sub>2</sub> 其他: ____    |    | <input type="checkbox"/> <sub>1</sub> | <input type="checkbox"/> <sub>2</sub> | <input type="checkbox"/> <sub>3</sub> | <input type="checkbox"/> <sub>0</sub> |
| 尿葡萄糖                                                   | <input type="checkbox"/> <sub>1</sub> mmol/L <input type="checkbox"/> <sub>2</sub> 其他: ____ |    | <input type="checkbox"/> <sub>1</sub> | <input type="checkbox"/> <sub>2</sub> | <input type="checkbox"/> <sub>3</sub> | <input type="checkbox"/> <sub>0</sub> |
| 尿 PH 值                                                 | <input type="checkbox"/> <sub>1</sub> 不适用 <input type="checkbox"/> <sub>2</sub> 其他: ____    |    | <input type="checkbox"/> <sub>1</sub> | <input type="checkbox"/> <sub>2</sub> | <input type="checkbox"/> <sub>3</sub> | <input type="checkbox"/> <sub>0</sub> |
| 尿红细胞                                                   | <input type="checkbox"/> <sub>1</sub> 不适用 <input type="checkbox"/> <sub>2</sub> 其他: ____    |    | <input type="checkbox"/> <sub>1</sub> | <input type="checkbox"/> <sub>2</sub> | <input type="checkbox"/> <sub>3</sub> | <input type="checkbox"/> <sub>0</sub> |
| 尿白细胞                                                   | <input type="checkbox"/> <sub>1</sub> 不适用 <input type="checkbox"/> <sub>2</sub> 其他: ____    |    | <input type="checkbox"/> <sub>1</sub> | <input type="checkbox"/> <sub>2</sub> | <input type="checkbox"/> <sub>3</sub> | <input type="checkbox"/> <sub>0</sub> |
| 尿酮体                                                    | <input type="checkbox"/> <sub>1</sub> 不适用 <input type="checkbox"/> <sub>2</sub> 其他: ____    |    | <input type="checkbox"/> <sub>1</sub> | <input type="checkbox"/> <sub>2</sub> | <input type="checkbox"/> <sub>3</sub> | <input type="checkbox"/> <sub>0</sub> |

| 凝血功能 <input type="checkbox"/> <sub>0</sub> 未查, 原因 _____ |                                                                                          |    |                                       |                                       |                                       |                                       |
|---------------------------------------------------------|------------------------------------------------------------------------------------------|----|---------------------------------------|---------------------------------------|---------------------------------------|---------------------------------------|
| 采样日期:  __ _ _ _ 年 __ _ 月 __ _ 日                         |                                                                                          |    |                                       | 正常值范围编号:  __ _ _ _                    |                                       |                                       |
| 检查项目                                                    | 测量结果                                                                                     |    | 结果判定                                  |                                       |                                       | 未查                                    |
|                                                         | 实测值                                                                                      | 单位 | 正常                                    | 异常                                    |                                       |                                       |
|                                                         |                                                                                          |    |                                       | 无临床意义                                 | 有临床意义                                 |                                       |
| 凝血酶原时间 (PT)                                             | <input type="checkbox"/> <sub>1</sub> S <input type="checkbox"/> <sub>2</sub> 其他: ____   |    | <input type="checkbox"/> <sub>1</sub> | <input type="checkbox"/> <sub>2</sub> | <input type="checkbox"/> <sub>3</sub> | <input type="checkbox"/> <sub>0</sub> |
| 活化部分凝血活酶时间 (APTT)                                       | <input type="checkbox"/> <sub>1</sub> S <input type="checkbox"/> <sub>2</sub> 其他: ____   |    | <input type="checkbox"/> <sub>1</sub> | <input type="checkbox"/> <sub>2</sub> | <input type="checkbox"/> <sub>3</sub> | <input type="checkbox"/> <sub>0</sub> |
| 凝血酶时间 (TT)                                              | <input type="checkbox"/> <sub>1</sub> S <input type="checkbox"/> <sub>2</sub> 其他: ____   |    | <input type="checkbox"/> <sub>1</sub> | <input type="checkbox"/> <sub>2</sub> | <input type="checkbox"/> <sub>3</sub> | <input type="checkbox"/> <sub>0</sub> |
| 血浆纤维蛋白原 (Fbg)                                           | <input type="checkbox"/> <sub>1</sub> g/L <input type="checkbox"/> <sub>2</sub> 其他: ____ |    | <input type="checkbox"/> <sub>1</sub> | <input type="checkbox"/> <sub>2</sub> | <input type="checkbox"/> <sub>3</sub> | <input type="checkbox"/> <sub>0</sub> |
| 国际标准化比率 (INR)                                           | <input type="checkbox"/> <sub>1</sub> 不适用 <input type="checkbox"/> <sub>2</sub> 其他: ____ |    | <input type="checkbox"/> <sub>1</sub> | <input type="checkbox"/> <sub>2</sub> | <input type="checkbox"/> <sub>3</sub> | <input type="checkbox"/> <sub>0</sub> |

| C 反应蛋白 (CRP) <input type="checkbox"/> <sub>0</sub> 未查, 原因 _____ |                                                                                           |    |                                       |                                       |                                       |    |
|-----------------------------------------------------------------|-------------------------------------------------------------------------------------------|----|---------------------------------------|---------------------------------------|---------------------------------------|----|
| 采样日期:  __ _ _ _ 年 __ _ 月 __ _ 日                                 |                                                                                           |    |                                       | 正常值范围编号:  __ _ _ _                    |                                       |    |
| 检查项目                                                            | 测量结果                                                                                      |    | 结果判定                                  |                                       |                                       | 未查 |
|                                                                 | 实测值                                                                                       | 单位 | 正常                                    | 异常                                    |                                       |    |
|                                                                 |                                                                                           |    |                                       | 无临床意义                                 | 有临床意义                                 |    |
| C 反应蛋白 (CRP)                                                    | <input type="checkbox"/> <sub>1</sub> mg/L <input type="checkbox"/> <sub>2</sub> 其他: ____ |    | <input type="checkbox"/> <sub>1</sub> | <input type="checkbox"/> <sub>2</sub> | <input type="checkbox"/> <sub>3</sub> |    |



|                   |                                      |
|-------------------|--------------------------------------|
| 研究方案编号: KY2020-29 | 治疗期                                  |
| 研究中心编号            | 受试者筛选号                 访视 6 (D21±2d) |

|                                                                                                                                            |                                                                                                                                                                                                                              |
|--------------------------------------------------------------------------------------------------------------------------------------------|------------------------------------------------------------------------------------------------------------------------------------------------------------------------------------------------------------------------------|
| <b>胸部 CT</b>                                                                                                                               | <input type="checkbox"/> <sub>0</sub> 未查, 原因 _____<br><input type="checkbox"/> <sub>1</sub> 不适用                                                                                                                              |
| 检查日期:             年         月         日                                                                                                    |                                                                                                                                                                                                                              |
| 检查结果: <input type="checkbox"/> <sub>1</sub> 正常 <input type="checkbox"/> <sub>2</sub> 异常无临床意义 <input type="checkbox"/> <sub>3</sub> 异常有临床意义 |                                                                                                                                                                                                                              |
| 若异常, 请描述: _____<br>_____                                                                                                                   |                                                                                                                                                                                                                              |
| 是否胸部 CT 病灶吸收较基线≥50%?                                                                                                                       | <input type="checkbox"/> <sub>0</sub> 否 <input type="checkbox"/> <sub>1</sub> 是 <input type="checkbox"/> <sub>2</sub> 无法判断 <input type="checkbox"/> <sub>3</sub> 不适用<br><input type="checkbox"/> <sub>4</sub> 其他, 请描述: _____ |

|                   |                                                                                                                                                                                                                                   |
|-------------------|-----------------------------------------------------------------------------------------------------------------------------------------------------------------------------------------------------------------------------------|
| <b>新型冠状病毒核酸检测</b> | <input type="checkbox"/> <sub>0</sub> 未查, 原因 _____                                                                                                                                                                                |
| 采样部位 (可多选)        | <input type="checkbox"/> <sub>0</sub> 上呼吸道 <input type="checkbox"/> <sub>1</sub> 下呼吸道                                                                                                                                             |
| 上呼吸道              | 采样日期:             年         月         日<br>检查结果: <input type="checkbox"/> <sub>1</sub> 阴性 <input type="checkbox"/> <sub>2</sub> 阳性 <input type="checkbox"/> <sub>3</sub> 无法判断 <input type="checkbox"/> <sub>4</sub> 其他, 请描述 _____ |
| 下呼吸道              | 采样日期:             年         月         日<br>检查结果: <input type="checkbox"/> <sub>1</sub> 阴性 <input type="checkbox"/> <sub>2</sub> 阳性 <input type="checkbox"/> <sub>3</sub> 无法判断 <input type="checkbox"/> <sub>4</sub> 其他, 请描述 _____ |
| 结果判定              | <input type="checkbox"/> <sub>1</sub> 阴性 <input type="checkbox"/> <sub>2</sub> 阳性 <input type="checkbox"/> <sub>3</sub> 无法判断 <input type="checkbox"/> <sub>4</sub> 其他, 请描述 _____                                                  |

|                                         |                                                    |
|-----------------------------------------|----------------------------------------------------|
| <b>指脉氧饱和度 (不吸氧情况下)</b>                  | <input type="checkbox"/> <sub>0</sub> 未查, 原因 _____ |
| 检查日期:             年         月         日 |                                                    |
| 实测值: _____ % (静息状态)                     |                                                    |

| <b>动脉血气分析</b>                                                                                                            | <input type="checkbox"/> <sub>0</sub> 未查, 原因 _____<br><input type="checkbox"/> <sub>1</sub> 不适用 |                                                                                            |                                       |                                                                             |                                       |
|--------------------------------------------------------------------------------------------------------------------------|-------------------------------------------------------------------------------------------------|--------------------------------------------------------------------------------------------|---------------------------------------|-----------------------------------------------------------------------------|---------------------------------------|
| 是否吸氧: <input type="checkbox"/> <sub>0</sub> 否 <input type="checkbox"/> <sub>1</sub> 是, 吸氧浓度 (FiO <sub>2</sub> ): _____ % |                                                                                                 |                                                                                            |                                       |                                                                             |                                       |
| 采样日期:             年         月         日                                                                                  | 正常值范围编号:                                                                                        |                                                                                            |                                       |                                                                             |                                       |
| 检查项目                                                                                                                     | 测量结果                                                                                            |                                                                                            | 结果判定                                  |                                                                             | 未查                                    |
|                                                                                                                          | 实测值                                                                                             | 单位                                                                                         | 正常                                    | 异常                                                                          |                                       |
|                                                                                                                          |                                                                                                 |                                                                                            |                                       | 无临床意义    有临床意义                                                              |                                       |
| 动脉血氧分压 (PaO <sub>2</sub> )                                                                                               |                                                                                                 | <input type="checkbox"/> <sub>1</sub> mmHg <input type="checkbox"/> <sub>2</sub> 其他: _____ | <input type="checkbox"/> <sub>1</sub> | <input type="checkbox"/> <sub>2</sub> <input type="checkbox"/> <sub>3</sub> | <input type="checkbox"/> <sub>0</sub> |
| 血氧饱和度 (SaO <sub>2</sub> )                                                                                                |                                                                                                 | <input type="checkbox"/> <sub>1</sub> % <input type="checkbox"/> <sub>2</sub> 其他: _____    | <input type="checkbox"/> <sub>1</sub> | <input type="checkbox"/> <sub>2</sub> <input type="checkbox"/> <sub>3</sub> | <input type="checkbox"/> <sub>0</sub> |



|                   |                           |
|-------------------|---------------------------|
| 研究方案编号: KY2020-29 | 治疗期                       |
| 研究中心编号  __        | 受试者筛选号  __ __ __ __ __ __ |
| 访视 6 (D21±2d)     |                           |

|                                                         |                                                                                                                                                                                                                                                                                                                                                                                              |
|---------------------------------------------------------|----------------------------------------------------------------------------------------------------------------------------------------------------------------------------------------------------------------------------------------------------------------------------------------------------------------------------------------------------------------------------------------------|
| 临床状态 <input type="checkbox"/> <sub>0</sub> 未评价, 原因_____ |                                                                                                                                                                                                                                                                                                                                                                                              |
| 评价日期                                                    | __ __ __ __ 年 __ __ 月 __ __ 日                                                                                                                                                                                                                                                                                                                                                                |
| 评价结果                                                    | <input type="checkbox"/> <sub>1</sub> 1级: 出院<br><input type="checkbox"/> <sub>2</sub> 2级: 住院, 不需要氧疗<br><input type="checkbox"/> <sub>3</sub> 3级: 住院, 需要氧疗 (非NIV/HFNC)<br><input type="checkbox"/> <sub>4</sub> 4级: ICU/住院, 需要无创机械通气 (NIV) /高流量鼻导管氧疗 (HFNC)<br><input type="checkbox"/> <sub>5</sub> 5级: ICU, 需要体外膜肺氧合 (ECMO) 和/或有创机械通气 (IMV)<br><input type="checkbox"/> <sub>6</sub> 6级: 死亡 |

自上次访视以来, 受试者如有不良事件发生, 请填写“不良事件”表; 如有合并药物治疗, 请填写“既往/合并药物治疗”表; 如有合并非药物治疗, 请填写“既往/合并非药物治疗”表; 如有计划外检查, 请填写“计划外检查”表。如有 IMV/NIV、ECMO、HFNC、氧疗, 请填写在“IMV/NIV、ECMO、HFNC、氧疗”表中。



|                   |            |
|-------------------|------------|
| 研究方案编号: KY2020-29 | 延伸随访期      |
| 研究中心编号  __        | 受试者筛选号  __ |
| 访视 7 (D28±2d)     |            |

访视类型: <sub>1</sub> 电话随访      <sub>2</sub> 医院随访

本次访视日期: |\_\_|年|\_\_|月|\_\_|日

如受试者已出院，以下内容可不进行，如未进行请留空；如受试者未出院，请进行以下检查。

|                                                         |                         |      |                                                                                                                                                                                                                                                                     |
|---------------------------------------------------------|-------------------------|------|---------------------------------------------------------------------------------------------------------------------------------------------------------------------------------------------------------------------------------------------------------------------|
| 生命体征 <input type="checkbox"/> <sub>0</sub> 未查, 原因 _____ |                         |      |                                                                                                                                                                                                                                                                     |
| 检查日期                                                    | __ 年 __ 月 __ 日          |      |                                                                                                                                                                                                                                                                     |
| 日最高体温                                                   | __ . __ °C              | 测量方式 | <input type="checkbox"/> <sub>1</sub> 腋下 <input type="checkbox"/> <sub>2</sub> 口腔 <input type="checkbox"/> <sub>3</sub> 肛门<br><input type="checkbox"/> <sub>4</sub> 耳朵 <input type="checkbox"/> <sub>5</sub> 未知 <input type="checkbox"/> <sub>6</sub> 其他, 请描述 _____ |
| 呼吸频率                                                    | __ 次/分                  | 脉搏   | __ 次/分                                                                                                                                                                                                                                                              |
| 血压                                                      | __ / __  mmHg (收缩压/舒张压) |      |                                                                                                                                                                                                                                                                     |

| 体格检查 <input type="checkbox"/> <sub>0</sub> 未查, 原因 _____ |                                       |                                       |                                       |                                       |       |
|---------------------------------------------------------|---------------------------------------|---------------------------------------|---------------------------------------|---------------------------------------|-------|
| 检查日期:  __ 年 __ 月 __ 日                                   |                                       |                                       |                                       |                                       |       |
| 检查部位                                                    | 检查结果                                  |                                       |                                       |                                       | 异常请描述 |
|                                                         | 1=正常                                  | 2=异常无临床意义                             | 3=异常有临床意义                             | 0=未查                                  |       |
| 整体外观                                                    | <input type="checkbox"/> <sub>1</sub> | <input type="checkbox"/> <sub>2</sub> | <input type="checkbox"/> <sub>3</sub> | <input type="checkbox"/> <sub>0</sub> |       |
| 头                                                       | <input type="checkbox"/> <sub>1</sub> | <input type="checkbox"/> <sub>2</sub> | <input type="checkbox"/> <sub>3</sub> | <input type="checkbox"/> <sub>0</sub> |       |
| 眼                                                       | <input type="checkbox"/> <sub>1</sub> | <input type="checkbox"/> <sub>2</sub> | <input type="checkbox"/> <sub>3</sub> | <input type="checkbox"/> <sub>0</sub> |       |
| 耳                                                       | <input type="checkbox"/> <sub>1</sub> | <input type="checkbox"/> <sub>2</sub> | <input type="checkbox"/> <sub>3</sub> | <input type="checkbox"/> <sub>0</sub> |       |
| 鼻                                                       | <input type="checkbox"/> <sub>1</sub> | <input type="checkbox"/> <sub>2</sub> | <input type="checkbox"/> <sub>3</sub> | <input type="checkbox"/> <sub>0</sub> |       |
| 喉                                                       | <input type="checkbox"/> <sub>1</sub> | <input type="checkbox"/> <sub>2</sub> | <input type="checkbox"/> <sub>3</sub> | <input type="checkbox"/> <sub>0</sub> |       |
| 颈部及甲状腺                                                  | <input type="checkbox"/> <sub>1</sub> | <input type="checkbox"/> <sub>2</sub> | <input type="checkbox"/> <sub>3</sub> | <input type="checkbox"/> <sub>0</sub> |       |
| 皮肤                                                      | <input type="checkbox"/> <sub>1</sub> | <input type="checkbox"/> <sub>2</sub> | <input type="checkbox"/> <sub>3</sub> | <input type="checkbox"/> <sub>0</sub> |       |
| 心血管系统                                                   | <input type="checkbox"/> <sub>1</sub> | <input type="checkbox"/> <sub>2</sub> | <input type="checkbox"/> <sub>3</sub> | <input type="checkbox"/> <sub>0</sub> |       |
| 胸部及肺                                                    | <input type="checkbox"/> <sub>1</sub> | <input type="checkbox"/> <sub>2</sub> | <input type="checkbox"/> <sub>3</sub> | <input type="checkbox"/> <sub>0</sub> |       |
| 腹部                                                      | <input type="checkbox"/> <sub>1</sub> | <input type="checkbox"/> <sub>2</sub> | <input type="checkbox"/> <sub>3</sub> | <input type="checkbox"/> <sub>0</sub> |       |
| 神经系统                                                    | <input type="checkbox"/> <sub>1</sub> | <input type="checkbox"/> <sub>2</sub> | <input type="checkbox"/> <sub>3</sub> | <input type="checkbox"/> <sub>0</sub> |       |

|                   |               |
|-------------------|---------------|
| 研究方案编号: KY2020-29 | 延伸随访期         |
| 研究中心编号  __        | 受试者筛选号  __    |
|                   | 访视 7 (D28±2d) |

|       |                                       |                                       |                                       |                                       |  |
|-------|---------------------------------------|---------------------------------------|---------------------------------------|---------------------------------------|--|
| 骨骼肌系统 | <input type="checkbox"/> <sub>1</sub> | <input type="checkbox"/> <sub>2</sub> | <input type="checkbox"/> <sub>3</sub> | <input type="checkbox"/> <sub>0</sub> |  |
| 淋巴系统  | <input type="checkbox"/> <sub>1</sub> | <input type="checkbox"/> <sub>2</sub> | <input type="checkbox"/> <sub>3</sub> | <input type="checkbox"/> <sub>0</sub> |  |

**有无呼吸道症状** <sub>0</sub> 未查, 原因 \_\_\_\_\_

检查日期: |\_\_| |\_\_| |\_\_| 年 |\_\_| |\_\_| 月 |\_\_| |\_\_| 日

受试者有无呼吸道症状: <sub>0</sub> 无 <sub>1</sub> 有, 请描述: \_\_\_\_\_

**血常规** <sub>0</sub> 未查, 原因 \_\_\_\_\_

采样日期: |\_\_| |\_\_| |\_\_| 年 |\_\_| |\_\_| 月 |\_\_| |\_\_| 日 正常值范围编号: |\_\_| |\_\_| |\_\_| |\_\_|

| 检查项目          | 测量结果                                                      |                                                 | 结果判定                                  |                                       |                                       | 未查                                    |
|---------------|-----------------------------------------------------------|-------------------------------------------------|---------------------------------------|---------------------------------------|---------------------------------------|---------------------------------------|
|               | 实测值                                                       | 单位                                              | 正常                                    | 异常                                    |                                       |                                       |
|               |                                                           |                                                 |                                       | 无临床意义                                 | 有临床意义                                 |                                       |
| 红细胞计数 (RBC)   | <input type="checkbox"/> <sub>1</sub> 10 <sup>12</sup> /L | <input type="checkbox"/> <sub>2</sub> 其他: _____ | <input type="checkbox"/> <sub>1</sub> | <input type="checkbox"/> <sub>2</sub> | <input type="checkbox"/> <sub>3</sub> | <input type="checkbox"/> <sub>0</sub> |
| 白细胞计数 (WBC)   | <input type="checkbox"/> <sub>1</sub> 10 <sup>9</sup> /L  | <input type="checkbox"/> <sub>2</sub> 其他: _____ | <input type="checkbox"/> <sub>1</sub> | <input type="checkbox"/> <sub>2</sub> | <input type="checkbox"/> <sub>3</sub> | <input type="checkbox"/> <sub>0</sub> |
| 血红蛋白 (Hb)     | <input type="checkbox"/> <sub>1</sub> g/L                 | <input type="checkbox"/> <sub>2</sub> 其他: _____ | <input type="checkbox"/> <sub>1</sub> | <input type="checkbox"/> <sub>2</sub> | <input type="checkbox"/> <sub>3</sub> | <input type="checkbox"/> <sub>0</sub> |
| 血小板计数 (PLT)   | <input type="checkbox"/> <sub>1</sub> 10 <sup>9</sup> /L  | <input type="checkbox"/> <sub>2</sub> 其他: _____ | <input type="checkbox"/> <sub>1</sub> | <input type="checkbox"/> <sub>2</sub> | <input type="checkbox"/> <sub>3</sub> | <input type="checkbox"/> <sub>0</sub> |
| 中性粒细胞计数 (ANC) | <input type="checkbox"/> <sub>1</sub> 10 <sup>9</sup> /L  | <input type="checkbox"/> <sub>2</sub> 其他: _____ | <input type="checkbox"/> <sub>1</sub> | <input type="checkbox"/> <sub>2</sub> | <input type="checkbox"/> <sub>3</sub> | <input type="checkbox"/> <sub>0</sub> |
| 淋巴细胞计数 (LY)   | <input type="checkbox"/> <sub>1</sub> 10 <sup>9</sup> /L  | <input type="checkbox"/> <sub>2</sub> 其他: _____ | <input type="checkbox"/> <sub>1</sub> | <input type="checkbox"/> <sub>2</sub> | <input type="checkbox"/> <sub>3</sub> | <input type="checkbox"/> <sub>0</sub> |
| 单核细胞计数 (MO)   | <input type="checkbox"/> <sub>1</sub> 10 <sup>9</sup> /L  | <input type="checkbox"/> <sub>2</sub> 其他: _____ | <input type="checkbox"/> <sub>1</sub> | <input type="checkbox"/> <sub>2</sub> | <input type="checkbox"/> <sub>3</sub> | <input type="checkbox"/> <sub>0</sub> |
| 嗜酸性粒细胞计数 (EO) | <input type="checkbox"/> <sub>1</sub> 10 <sup>9</sup> /L  | <input type="checkbox"/> <sub>2</sub> 其他: _____ | <input type="checkbox"/> <sub>1</sub> | <input type="checkbox"/> <sub>2</sub> | <input type="checkbox"/> <sub>3</sub> | <input type="checkbox"/> <sub>0</sub> |
| 嗜碱性粒细胞计数 (BA) | <input type="checkbox"/> <sub>1</sub> 10 <sup>9</sup> /L  | <input type="checkbox"/> <sub>2</sub> 其他: _____ | <input type="checkbox"/> <sub>1</sub> | <input type="checkbox"/> <sub>2</sub> | <input type="checkbox"/> <sub>3</sub> | <input type="checkbox"/> <sub>0</sub> |

**血生化** <sub>0</sub> 未查, 原因 \_\_\_\_\_

采样日期: |\_\_| |\_\_| |\_\_| 年 |\_\_| |\_\_| 月 |\_\_| |\_\_| 日 正常值范围编号: |\_\_| |\_\_| |\_\_| |\_\_|

| 检查项目           | 测量结果                                         |                                                 | 结果判定                                  |                                       |                                       | 未查                                    |
|----------------|----------------------------------------------|-------------------------------------------------|---------------------------------------|---------------------------------------|---------------------------------------|---------------------------------------|
|                | 实测值                                          | 单位                                              | 正常                                    | 异常                                    |                                       |                                       |
|                |                                              |                                                 |                                       | 无临床意义                                 | 有临床意义                                 |                                       |
| 谷丙转氨酶 (ALT)    | <input type="checkbox"/> <sub>1</sub> U/L    | <input type="checkbox"/> <sub>2</sub> 其他: _____ | <input type="checkbox"/> <sub>1</sub> | <input type="checkbox"/> <sub>2</sub> | <input type="checkbox"/> <sub>3</sub> | <input type="checkbox"/> <sub>0</sub> |
| 谷草转氨酶 (AST)    | <input type="checkbox"/> <sub>1</sub> U/L    | <input type="checkbox"/> <sub>2</sub> 其他: _____ | <input type="checkbox"/> <sub>1</sub> | <input type="checkbox"/> <sub>2</sub> | <input type="checkbox"/> <sub>3</sub> | <input type="checkbox"/> <sub>0</sub> |
| 总胆红素 (TBIL)    | <input type="checkbox"/> <sub>1</sub> μmol/L | <input type="checkbox"/> <sub>2</sub> 其他: _____ | <input type="checkbox"/> <sub>1</sub> | <input type="checkbox"/> <sub>2</sub> | <input type="checkbox"/> <sub>3</sub> | <input type="checkbox"/> <sub>0</sub> |
| 白蛋白 (ALB)      | <input type="checkbox"/> <sub>1</sub> g/L    | <input type="checkbox"/> <sub>2</sub> 其他: _____ | <input type="checkbox"/> <sub>1</sub> | <input type="checkbox"/> <sub>2</sub> | <input type="checkbox"/> <sub>3</sub> | <input type="checkbox"/> <sub>0</sub> |
| γ-谷氨酰转肽酶 (GGT) | <input type="checkbox"/> <sub>1</sub> U/L    | <input type="checkbox"/> <sub>2</sub> 其他: _____ | <input type="checkbox"/> <sub>1</sub> | <input type="checkbox"/> <sub>2</sub> | <input type="checkbox"/> <sub>3</sub> | <input type="checkbox"/> <sub>0</sub> |
| 乳酸脱氢酶 (LDH)    | <input type="checkbox"/> <sub>1</sub> U/L    | <input type="checkbox"/> <sub>2</sub> 其他: _____ | <input type="checkbox"/> <sub>1</sub> | <input type="checkbox"/> <sub>2</sub> | <input type="checkbox"/> <sub>3</sub> | <input type="checkbox"/> <sub>0</sub> |

|                   |               |
|-------------------|---------------|
| 研究方案编号: KY2020-29 | 延伸随访期         |
| 研究中心编号  __        | 受试者筛选号  __    |
|                   | 访视 7 (D28±2d) |

|                 |                                                                                             |                                       |                                       |                                       |                                       |
|-----------------|---------------------------------------------------------------------------------------------|---------------------------------------|---------------------------------------|---------------------------------------|---------------------------------------|
| 肌酸激酶 (CK)       | <input type="checkbox"/> <sub>1</sub> U/L <input type="checkbox"/> <sub>2</sub> 其他: ____    | <input type="checkbox"/> <sub>1</sub> | <input type="checkbox"/> <sub>2</sub> | <input type="checkbox"/> <sub>3</sub> | <input type="checkbox"/> <sub>0</sub> |
| 肌酸激酶同工酶 (CK-MB) | <input type="checkbox"/> <sub>1</sub> U/L <input type="checkbox"/> <sub>2</sub> 其他: ____    | <input type="checkbox"/> <sub>1</sub> | <input type="checkbox"/> <sub>2</sub> | <input type="checkbox"/> <sub>3</sub> | <input type="checkbox"/> <sub>0</sub> |
| 血尿素氮 (BUN)      | <input type="checkbox"/> <sub>1</sub> mmol/L <input type="checkbox"/> <sub>2</sub> 其他: ____ | <input type="checkbox"/> <sub>1</sub> | <input type="checkbox"/> <sub>2</sub> | <input type="checkbox"/> <sub>3</sub> | <input type="checkbox"/> <sub>0</sub> |
| 尿素 (Urea)       | <input type="checkbox"/> <sub>1</sub> mmol/L <input type="checkbox"/> <sub>2</sub> 其他: ____ | <input type="checkbox"/> <sub>1</sub> | <input type="checkbox"/> <sub>2</sub> | <input type="checkbox"/> <sub>3</sub> | <input type="checkbox"/> <sub>0</sub> |
| 血肌酐 (CR)        | <input type="checkbox"/> <sub>1</sub> μmol/L <input type="checkbox"/> <sub>2</sub> 其他: ____ | <input type="checkbox"/> <sub>1</sub> | <input type="checkbox"/> <sub>2</sub> | <input type="checkbox"/> <sub>3</sub> | <input type="checkbox"/> <sub>0</sub> |

| 尿常规 <input type="checkbox"/> <sub>0</sub> 未查, 原因_____ |                                                                                             |    |                                       |                                       |                                       |                                       |
|-------------------------------------------------------|---------------------------------------------------------------------------------------------|----|---------------------------------------|---------------------------------------|---------------------------------------|---------------------------------------|
| 采样日期:  __ 年 __ 月 __ 日                                 |                                                                                             |    |                                       | 正常值范围编号:  __                          |                                       |                                       |
| 检查项目                                                  | 测量结果                                                                                        |    | 结果判定                                  |                                       |                                       | 未查                                    |
|                                                       | 实测值                                                                                         | 单位 | 正常                                    | 异常                                    |                                       |                                       |
|                                                       |                                                                                             |    |                                       | 无临床意义                                 | 有临床意义                                 |                                       |
| 尿蛋白                                                   | <input type="checkbox"/> <sub>1</sub> 不适用 <input type="checkbox"/> <sub>2</sub> 其他: ____    |    | <input type="checkbox"/> <sub>1</sub> | <input type="checkbox"/> <sub>2</sub> | <input type="checkbox"/> <sub>3</sub> | <input type="checkbox"/> <sub>0</sub> |
| 尿葡萄糖                                                  | <input type="checkbox"/> <sub>1</sub> mmol/L <input type="checkbox"/> <sub>2</sub> 其他: ____ |    | <input type="checkbox"/> <sub>1</sub> | <input type="checkbox"/> <sub>2</sub> | <input type="checkbox"/> <sub>3</sub> | <input type="checkbox"/> <sub>0</sub> |
| 尿 PH 值                                                | <input type="checkbox"/> <sub>1</sub> 不适用 <input type="checkbox"/> <sub>2</sub> 其他: ____    |    | <input type="checkbox"/> <sub>1</sub> | <input type="checkbox"/> <sub>2</sub> | <input type="checkbox"/> <sub>3</sub> | <input type="checkbox"/> <sub>0</sub> |
| 尿红细胞                                                  | <input type="checkbox"/> <sub>1</sub> 不适用 <input type="checkbox"/> <sub>2</sub> 其他: ____    |    | <input type="checkbox"/> <sub>1</sub> | <input type="checkbox"/> <sub>2</sub> | <input type="checkbox"/> <sub>3</sub> | <input type="checkbox"/> <sub>0</sub> |
| 尿白细胞                                                  | <input type="checkbox"/> <sub>1</sub> 不适用 <input type="checkbox"/> <sub>2</sub> 其他: ____    |    | <input type="checkbox"/> <sub>1</sub> | <input type="checkbox"/> <sub>2</sub> | <input type="checkbox"/> <sub>3</sub> | <input type="checkbox"/> <sub>0</sub> |
| 尿酮体                                                   | <input type="checkbox"/> <sub>1</sub> 不适用 <input type="checkbox"/> <sub>2</sub> 其他: ____    |    | <input type="checkbox"/> <sub>1</sub> | <input type="checkbox"/> <sub>2</sub> | <input type="checkbox"/> <sub>3</sub> | <input type="checkbox"/> <sub>0</sub> |

| 凝血功能 <input type="checkbox"/> <sub>0</sub> 未查, 原因_____ |                                                                                          |    |                                       |                                       |                                       |                                       |
|--------------------------------------------------------|------------------------------------------------------------------------------------------|----|---------------------------------------|---------------------------------------|---------------------------------------|---------------------------------------|
| 采样日期:  __ 年 __ 月 __ 日                                  |                                                                                          |    |                                       | 正常值范围编号:  __                          |                                       |                                       |
| 检查项目                                                   | 测量结果                                                                                     |    | 结果判定                                  |                                       |                                       | 未查                                    |
|                                                        | 实测值                                                                                      | 单位 | 正常                                    | 异常                                    |                                       |                                       |
|                                                        |                                                                                          |    |                                       | 无临床意义                                 | 有临床意义                                 |                                       |
| 凝血酶原时间 (PT)                                            | <input type="checkbox"/> <sub>1</sub> S <input type="checkbox"/> <sub>2</sub> 其他: ____   |    | <input type="checkbox"/> <sub>1</sub> | <input type="checkbox"/> <sub>2</sub> | <input type="checkbox"/> <sub>3</sub> | <input type="checkbox"/> <sub>0</sub> |
| 活化部分凝血活酶时间 (APTT)                                      | <input type="checkbox"/> <sub>1</sub> S <input type="checkbox"/> <sub>2</sub> 其他: ____   |    | <input type="checkbox"/> <sub>1</sub> | <input type="checkbox"/> <sub>2</sub> | <input type="checkbox"/> <sub>3</sub> | <input type="checkbox"/> <sub>0</sub> |
| 凝血酶时间 (TT)                                             | <input type="checkbox"/> <sub>1</sub> S <input type="checkbox"/> <sub>2</sub> 其他: ____   |    | <input type="checkbox"/> <sub>1</sub> | <input type="checkbox"/> <sub>2</sub> | <input type="checkbox"/> <sub>3</sub> | <input type="checkbox"/> <sub>0</sub> |
| 血浆纤维蛋白原 (Fbg)                                          | <input type="checkbox"/> <sub>1</sub> g/L <input type="checkbox"/> <sub>2</sub> 其他: ____ |    | <input type="checkbox"/> <sub>1</sub> | <input type="checkbox"/> <sub>2</sub> | <input type="checkbox"/> <sub>3</sub> | <input type="checkbox"/> <sub>0</sub> |
| 国际标准化比率 (INR)                                          | <input type="checkbox"/> <sub>1</sub> 不适用 <input type="checkbox"/> <sub>2</sub> 其他: ____ |    | <input type="checkbox"/> <sub>1</sub> | <input type="checkbox"/> <sub>2</sub> | <input type="checkbox"/> <sub>3</sub> | <input type="checkbox"/> <sub>0</sub> |

| C 反应蛋白 (CRP) <input type="checkbox"/> <sub>0</sub> 未查, 原因_____ |      |    |      |              |  |  |
|----------------------------------------------------------------|------|----|------|--------------|--|--|
| 采样日期:  __ 年 __ 月 __ 日                                          |      |    |      | 正常值范围编号:  __ |  |  |
| 检查项目                                                           | 测量结果 |    | 结果判定 |              |  |  |
|                                                                | 实测值  | 单位 | 正常   | 异常           |  |  |

|                             |                             |
|-----------------------------|-----------------------------|
| 研究方案编号: KY2020-29           | 延伸随访期                       |
| 研究中心编号 <input type="text"/> | 受试者筛选号 <input type="text"/> |
| 访视 7 (D28±2d)               |                             |

|              |                          |                          |                          |                          |                          |
|--------------|--------------------------|--------------------------|--------------------------|--------------------------|--------------------------|
| C 反应蛋白 (CRP) |                          |                          |                          | 无临床意义                    | 有临床意义                    |
|              | <input type="checkbox"/> | <input type="checkbox"/> | <input type="checkbox"/> | <input type="checkbox"/> | <input type="checkbox"/> |

|                                                                            |                          |                          |                               |                          |                          |
|----------------------------------------------------------------------------|--------------------------|--------------------------|-------------------------------|--------------------------|--------------------------|
| 血沉 (ESR) <input type="checkbox"/> 未查, 原因 _____                             |                          |                          |                               |                          |                          |
| 采样日期: <input type="text"/> 年 <input type="text"/> 月 <input type="text"/> 日 |                          |                          | 正常值范围编号: <input type="text"/> |                          |                          |
| 检查项目                                                                       | 测量结果                     |                          | 结果判定                          |                          |                          |
| 血沉 (ESR)                                                                   | 实测值                      | 单位                       | 正常                            | 异常                       |                          |
|                                                                            |                          |                          |                               | 无临床意义                    | 有临床意义                    |
|                                                                            | <input type="checkbox"/> | <input type="checkbox"/> | <input type="checkbox"/>      | <input type="checkbox"/> | <input type="checkbox"/> |

|                                                                            |                          |                          |                               |                          |                          |
|----------------------------------------------------------------------------|--------------------------|--------------------------|-------------------------------|--------------------------|--------------------------|
| TNF-α <input type="checkbox"/> 未查, 原因 _____                                |                          |                          |                               |                          |                          |
| 采样日期: <input type="text"/> 年 <input type="text"/> 月 <input type="text"/> 日 |                          |                          | 正常值范围编号: <input type="text"/> |                          |                          |
| 检查项目                                                                       | 测量结果                     |                          | 结果判定                          |                          |                          |
| TNF-α                                                                      | 实测值                      | 单位                       | 正常                            | 异常                       |                          |
|                                                                            |                          |                          |                               | 无临床意义                    | 有临床意义                    |
|                                                                            | <input type="checkbox"/> | <input type="checkbox"/> | <input type="checkbox"/>      | <input type="checkbox"/> | <input type="checkbox"/> |

|                                                                            |                          |                          |                               |                          |                          |
|----------------------------------------------------------------------------|--------------------------|--------------------------|-------------------------------|--------------------------|--------------------------|
| IL-6 <input type="checkbox"/> 未查, 原因 _____                                 |                          |                          |                               |                          |                          |
| 采样日期: <input type="text"/> 年 <input type="text"/> 月 <input type="text"/> 日 |                          |                          | 正常值范围编号: <input type="text"/> |                          |                          |
| 检查项目                                                                       | 测量结果                     |                          | 结果判定                          |                          |                          |
| IL-6                                                                       | 实测值                      | 单位                       | 正常                            | 异常                       |                          |
|                                                                            |                          |                          |                               | 无临床意义                    | 有临床意义                    |
|                                                                            | <input type="checkbox"/> | <input type="checkbox"/> | <input type="checkbox"/>      | <input type="checkbox"/> | <input type="checkbox"/> |

|                                                                                                     |  |  |  |  |  |
|-----------------------------------------------------------------------------------------------------|--|--|--|--|--|
| 12 导联心电图 <input type="checkbox"/> 未查, 原因 _____                                                      |  |  |  |  |  |
| 检查日期: <input type="text"/> 年 <input type="text"/> 月 <input type="text"/> 日                          |  |  |  |  |  |
| 检查结果: <input type="checkbox"/> 正常 <input type="checkbox"/> 异常无临床意义 <input type="checkbox"/> 异常有临床意义 |  |  |  |  |  |
| 若“异常”, 请描述: _____                                                                                   |  |  |  |  |  |

|                                                                                                     |  |  |  |  |  |
|-----------------------------------------------------------------------------------------------------|--|--|--|--|--|
| 胸部 CT <input type="checkbox"/> 未查, 原因 _____                                                         |  |  |  |  |  |
| <input type="checkbox"/> 不适用                                                                        |  |  |  |  |  |
| 检查日期: <input type="text"/> 年 <input type="text"/> 月 <input type="text"/> 日                          |  |  |  |  |  |
| 检查结果: <input type="checkbox"/> 正常 <input type="checkbox"/> 异常无临床意义 <input type="checkbox"/> 异常有临床意义 |  |  |  |  |  |

|                   |                     |
|-------------------|---------------------|
| 研究方案编号: KY2020-29 | 延伸随访期               |
| 研究中心编号  __        | 受试者筛选号  __ __ __ __ |
| 访视 7 (D28±2d)     |                     |

若异常, 请描述: \_\_\_\_\_

是否胸部 CT 病灶吸收较基线≥50%? \_0 否 \_1 是 \_2 无法判断 \_3 不适用  
\_4 其他, 请描述: \_\_\_\_\_

**新型冠状病毒核酸检测** \_0 未查, 原因\_\_\_\_\_

|            |                                                                                                                                                                                    |
|------------|------------------------------------------------------------------------------------------------------------------------------------------------------------------------------------|
| 采样部位 (可多选) | <input type="checkbox"/> _0 上呼吸道 <input type="checkbox"/> _1 下呼吸道                                                                                                                  |
| 上呼吸道       | 采样日期:  __ __ __ 年 __ __ 月 __ __ 日<br>检查结果: <input type="checkbox"/> _1 阴性 <input type="checkbox"/> _2 阳性 <input type="checkbox"/> _3 无法判断 <input type="checkbox"/> _4 其他, 请描述_____ |
| 下呼吸道       | 采样日期:  __ __ __ 年 __ __ 月 __ __ 日<br>检查结果: <input type="checkbox"/> _1 阴性 <input type="checkbox"/> _2 阳性 <input type="checkbox"/> _3 无法判断 <input type="checkbox"/> _4 其他, 请描述_____ |
| 结果判定       | <input type="checkbox"/> _1 阴性 <input type="checkbox"/> _2 阳性 <input type="checkbox"/> _3 无法判断 <input type="checkbox"/> _4 其他, 请描述_____                                            |

**指脉氧饱和度 (不吸氧情况下)** \_0 未查, 原因\_\_\_\_\_

检查日期: |\_\_|\_\_|\_\_|年|\_\_|\_\_|月|\_\_|\_\_|日

实测值: \_\_\_\_\_% (静息状态)

**动脉血气分析** \_0 未查, 原因\_\_\_\_\_

\_1 不适用

是否吸氧: \_0 否 \_1 是, 吸氧浓度 (FiO2): \_\_\_\_\_%

采样日期: |\_\_|\_\_|\_\_|年|\_\_|\_\_|月|\_\_|\_\_|日 正常值范围编号: |\_\_|\_\_|\_\_|

| 检查项目          | 测量结果 |                                                                        | 结果判定                        |                             |                             | 未查                          |
|---------------|------|------------------------------------------------------------------------|-----------------------------|-----------------------------|-----------------------------|-----------------------------|
|               | 实测值  | 单位                                                                     | 正常                          | 异常                          |                             |                             |
|               |      |                                                                        |                             | 无临床意义                       | 有临床意义                       |                             |
| 动脉血氧分压 (PaO2) |      | <input type="checkbox"/> _1 mmHg <input type="checkbox"/> _2 其他: _____ | <input type="checkbox"/> _1 | <input type="checkbox"/> _2 | <input type="checkbox"/> _3 | <input type="checkbox"/> _0 |
| 血氧饱和度 (SaO2)  |      | <input type="checkbox"/> _1 % <input type="checkbox"/> _2 其他: _____    | <input type="checkbox"/> _1 | <input type="checkbox"/> _2 | <input type="checkbox"/> _3 | <input type="checkbox"/> _0 |

**临床状态** \_0 未评价, 原因\_\_\_\_\_

评价日期: |\_\_|\_\_|\_\_|年|\_\_|\_\_|月|\_\_|\_\_|日

评价结果

\_1 1级: 出院  
\_2 2级: 住院, 不需要氧疗  
\_3 3级: 住院, 需要氧疗 (非NIV/HFNC)  
\_4 4级: ICU/住院, 需要无创机械通气 (NIV) /高流量鼻导管氧疗 (HFNC)

|                                                                                                      |            |               |
|------------------------------------------------------------------------------------------------------|------------|---------------|
| 研究方案编号: KY2020-29                                                                                    |            | 延伸随访期         |
| 研究中心编号  __                                                                                           | 受试者筛选号  __ | 访视 7 (D28±2d) |
| <input type="checkbox"/> 5级: ICU, 需要体外膜肺氧合 (ECMO) 和/或有创机械通气 (IMV)<br><input type="checkbox"/> 6级: 死亡 |            |               |

自上次访视以来, 受试者如有不良事件发生, 请填写“不良事件”表; 如有合并药物治疗, 请填写“既往/合并药物治疗”表; 如有合并非药物治疗, 请填写“既往/合并非药物治疗”表; 如有计划外检查, 请填写“计划外检查”表。如有 IMV/NIV、ECMO、HFNC、氧疗, 请填写在“IMV/NIV、ECMO、HFNC、氧疗”表中。



|                             |                 |
|-----------------------------|-----------------|
| 研究方案编号: KY2020-29           | <b>试验药物使用情况</b> |
| 研究中心编号 <input type="text"/> |                 |

受试者是否使用试验药物?      <sub>0</sub> 否      <sub>1</sub> 是      <sub>2</sub> 不适用 (对照组)

**试验药物使用情况**

| 服药天数 | 是否用药                                                                               | 用药日期                                                                 | 计划每日给药总剂量 (mg)       | 实际每日给药总剂量 (mg)       | 给药频率 (1)             | 给药情况 (2)             | 如剂量调整或暂停给药, 请说明原因                                                                                     | 如漏服、多服, 或其他情况请说明 |
|------|------------------------------------------------------------------------------------|----------------------------------------------------------------------|----------------------|----------------------|----------------------|----------------------|-------------------------------------------------------------------------------------------------------|------------------|
| 第__天 | <input type="checkbox"/> <sub>0</sub> 否<br><input type="checkbox"/> <sub>1</sub> 是 | <input type="text"/> 年 <input type="text"/> 月 <input type="text"/> 日 | <input type="text"/> | <input type="text"/> | <input type="text"/> | <input type="text"/> | <input type="checkbox"/> <sub>1</sub> 不良事件, 编号: __<br><input type="checkbox"/> <sub>2</sub> 其他: _____ |                  |
| 第__天 | <input type="checkbox"/> <sub>0</sub> 否<br><input type="checkbox"/> <sub>1</sub> 是 | <input type="text"/> 年 <input type="text"/> 月 <input type="text"/> 日 | <input type="text"/> | <input type="text"/> | <input type="text"/> | <input type="text"/> | <input type="checkbox"/> <sub>1</sub> 不良事件, 编号: __<br><input type="checkbox"/> <sub>2</sub> 其他: _____ |                  |
| 第__天 | <input type="checkbox"/> <sub>0</sub> 否<br><input type="checkbox"/> <sub>1</sub> 是 | <input type="text"/> 年 <input type="text"/> 月 <input type="text"/> 日 | <input type="text"/> | <input type="text"/> | <input type="text"/> | <input type="text"/> | <input type="checkbox"/> <sub>1</sub> 不良事件, 编号: __<br><input type="checkbox"/> <sub>2</sub> 其他: _____ |                  |
| 第__天 | <input type="checkbox"/> <sub>0</sub> 否<br><input type="checkbox"/> <sub>1</sub> 是 | <input type="text"/> 年 <input type="text"/> 月 <input type="text"/> 日 | <input type="text"/> | <input type="text"/> | <input type="text"/> | <input type="text"/> | <input type="checkbox"/> <sub>1</sub> 不良事件, 编号: __<br><input type="checkbox"/> <sub>2</sub> 其他: _____ |                  |
| 第__天 | <input type="checkbox"/> <sub>0</sub> 否<br><input type="checkbox"/> <sub>1</sub> 是 | <input type="text"/> 年 <input type="text"/> 月 <input type="text"/> 日 | <input type="text"/> | <input type="text"/> | <input type="text"/> | <input type="text"/> | <input type="checkbox"/> <sub>1</sub> 不良事件, 编号: __<br><input type="checkbox"/> <sub>2</sub> 其他: _____ |                  |
| 第__天 | <input type="checkbox"/> <sub>0</sub> 否<br><input type="checkbox"/> <sub>1</sub> 是 | <input type="text"/> 年 <input type="text"/> 月 <input type="text"/> 日 | <input type="text"/> | <input type="text"/> | <input type="text"/> | <input type="text"/> | <input type="checkbox"/> <sub>1</sub> 不良事件, 编号: __<br><input type="checkbox"/> <sub>2</sub> 其他: _____ |                  |
| 第__天 | <input type="checkbox"/> <sub>0</sub> 否<br><input type="checkbox"/> <sub>1</sub> 是 | <input type="text"/> 年 <input type="text"/> 月 <input type="text"/> 日 | <input type="text"/> | <input type="text"/> | <input type="text"/> | <input type="text"/> | <input type="checkbox"/> <sub>1</sub> 不良事件, 编号: __<br><input type="checkbox"/> <sub>2</sub> 其他: _____ |                  |
| 第__天 | <input type="checkbox"/> <sub>0</sub> 否<br><input type="checkbox"/> <sub>1</sub> 是 | <input type="text"/> 年 <input type="text"/> 月 <input type="text"/> 日 | <input type="text"/> | <input type="text"/> | <input type="text"/> | <input type="text"/> | <input type="checkbox"/> <sub>1</sub> 不良事件, 编号: __<br><input type="checkbox"/> <sub>2</sub> 其他: _____ |                  |

(1) 给药频率: 1=每日三次 2=每日两次 3=每日一次 4=未知 5=其他, 请在横线处具体描述  
 (2) 给药情况: 1=不适用 2=剂量调整 3=漏服 4=多服 5=暂停给药 6=其他, 请在横线处具体描述



|                                                                                                                                      |             |
|--------------------------------------------------------------------------------------------------------------------------------------|-------------|
| 研究方案编号: KY2020-29                                                                                                                    | <b>不良事件</b> |
| 研究中心编号 <input type="text"/> <input type="text"/> <input type="text"/> <input type="text"/> <input type="text"/> <input type="text"/> |             |

受试者是否发生不良事件?  否  是, 请参照表格下方的编码详细填写在下表中。

| 不良事件                                 |        |                                                                         |                                                                            |                                                                         |                      |                                                                    |                                                    |                                                                                           |                      |                          |                       |
|--------------------------------------|--------|-------------------------------------------------------------------------|----------------------------------------------------------------------------|-------------------------------------------------------------------------|----------------------|--------------------------------------------------------------------|----------------------------------------------------|-------------------------------------------------------------------------------------------|----------------------|--------------------------|-----------------------|
| 编号                                   | 不良事件名称 | 开始日期                                                                    | 研究结束时是否持续?                                                                 |                                                                         | CTCAE等级<br>(1)       | 采取的措施                                                              |                                                    | 与研究药<br>物的关系<br>(4)                                                                       | AE<br>转归<br>(5)      | 是否为SAE?                  |                       |
|                                      |        |                                                                         | 是                                                                          | 否→结束日期                                                                  |                      | 对研究药物<br>的措施 (2)                                                   | 其它措施<br>(3)                                        |                                                                                           |                      | 否                        | 是, SAE<br>具体类型<br>(6) |
| 1                                    |        | <input type="text"/> 年<br><input type="text"/> 月 <input type="text"/> 日 | <input type="checkbox"/>                                                   | <input type="text"/> 年<br><input type="text"/> 月 <input type="text"/> 日 | <input type="text"/> | <input type="text"/>                                               | <input type="text"/>                               | <input type="text"/>                                                                      | <input type="text"/> | <input type="checkbox"/> | <input type="text"/>  |
| 2                                    |        | <input type="text"/> 年<br><input type="text"/> 月 <input type="text"/> 日 | <input type="checkbox"/>                                                   | <input type="text"/> 年<br><input type="text"/> 月 <input type="text"/> 日 | <input type="text"/> | <input type="text"/>                                               | <input type="text"/>                               | <input type="text"/>                                                                      | <input type="text"/> | <input type="checkbox"/> | <input type="text"/>  |
| 3                                    |        | <input type="text"/> 年<br><input type="text"/> 月 <input type="text"/> 日 | <input type="checkbox"/>                                                   | <input type="text"/> 年<br><input type="text"/> 月 <input type="text"/> 日 | <input type="text"/> | <input type="text"/>                                               | <input type="text"/>                               | <input type="text"/>                                                                      | <input type="text"/> | <input type="checkbox"/> | <input type="text"/>  |
| 4                                    |        | <input type="text"/> 年<br><input type="text"/> 月 <input type="text"/> 日 | <input type="checkbox"/>                                                   | <input type="text"/> 年<br><input type="text"/> 月 <input type="text"/> 日 | <input type="text"/> | <input type="text"/>                                               | <input type="text"/>                               | <input type="text"/>                                                                      | <input type="text"/> | <input type="checkbox"/> | <input type="text"/>  |
| (1) CTCAE等级                          |        | (2) 对研究药物的措施                                                            | (3) 其它措施                                                                   |                                                                         |                      | (4) 与研究药物关系                                                        | (5) AE转归                                           | (6) SAE具体类型                                                                               |                      |                          |                       |
| 1=1级<br>2=2级<br>3=3级<br>4=4级<br>5=5级 |        | 1=维持目前治疗<br>2=用药暂停<br>3=用药终止<br>4=减小剂量<br>5=不适用<br>6=其它, 请在横线处具体描述      | 1=无<br>2=合并用药, 填写既往/合并药物治疗表<br>3=合并非药物治疗, 填写既往/合并非药物治疗表<br>4=其它, 请在横线处具体描述 |                                                                         |                      | 1=肯定有关<br>2=很可能有关<br>3=可能有关<br>4=可能无关<br>5=肯定无关<br>6=待评价<br>7=无法评价 | 1=未恢复/未治愈<br>2=恢复/治愈<br>3=恢复但留有后遗症<br>4=死亡<br>5=未知 | 1=危及生命<br>2=导致死亡<br>3=需住院治疗或延长目前住院时间<br>4=导致永久或显著的残疾或功能障碍<br>5=导致先天畸形/出生缺陷<br>6=其它重要的医学事件 |                      |                          |                       |

|                             |      |
|-----------------------------|------|
| 研究方案编号: KY2020-29           | 不良事件 |
| 研究中心编号 <input type="text"/> |      |

| 不良事件                                 |                                                                    |                                                                            |                          |                                                                         |                                                                    |                                                    |                                                                                           |                      |                      |                          |                       |
|--------------------------------------|--------------------------------------------------------------------|----------------------------------------------------------------------------|--------------------------|-------------------------------------------------------------------------|--------------------------------------------------------------------|----------------------------------------------------|-------------------------------------------------------------------------------------------|----------------------|----------------------|--------------------------|-----------------------|
| 编号                                   | 不良事件名称                                                             | 开始日期                                                                       | 研究结束时是否持续?               |                                                                         | CTCAE<br>等级<br>(1)                                                 | 采取的措施                                              |                                                                                           | 与研究药<br>物的关系<br>(4)  | AE<br>转归<br>(5)      | 是否为SAE?                  |                       |
|                                      |                                                                    |                                                                            | 是                        | 否→结束日期                                                                  |                                                                    | 对研究药物<br>的措施(2)                                    | 其它措施<br>(3)                                                                               |                      |                      | 否                        | 是, SAE<br>具体类型<br>(6) |
|                                      |                                                                    | <input type="text"/> 年<br><input type="text"/> 月 <input type="text"/> 日    | <input type="checkbox"/> | <input type="text"/> 年<br><input type="text"/> 月 <input type="text"/> 日 | <input type="text"/>                                               | <input type="text"/>                               | <input type="text"/>                                                                      | <input type="text"/> | <input type="text"/> | <input type="checkbox"/> | <input type="text"/>  |
|                                      |                                                                    | <input type="text"/> 年<br><input type="text"/> 月 <input type="text"/> 日    | <input type="checkbox"/> | <input type="text"/> 年<br><input type="text"/> 月 <input type="text"/> 日 | <input type="text"/>                                               | <input type="text"/>                               | <input type="text"/>                                                                      | <input type="text"/> | <input type="text"/> | <input type="checkbox"/> | <input type="text"/>  |
|                                      |                                                                    | <input type="text"/> 年<br><input type="text"/> 月 <input type="text"/> 日    | <input type="checkbox"/> | <input type="text"/> 年<br><input type="text"/> 月 <input type="text"/> 日 | <input type="text"/>                                               | <input type="text"/>                               | <input type="text"/>                                                                      | <input type="text"/> | <input type="text"/> | <input type="checkbox"/> | <input type="text"/>  |
|                                      |                                                                    | <input type="text"/> 年<br><input type="text"/> 月 <input type="text"/> 日    | <input type="checkbox"/> | <input type="text"/> 年<br><input type="text"/> 月 <input type="text"/> 日 | <input type="text"/>                                               | <input type="text"/>                               | <input type="text"/>                                                                      | <input type="text"/> | <input type="text"/> | <input type="checkbox"/> | <input type="text"/>  |
|                                      |                                                                    | <input type="text"/> 年<br><input type="text"/> 月 <input type="text"/> 日    | <input type="checkbox"/> | <input type="text"/> 年<br><input type="text"/> 月 <input type="text"/> 日 | <input type="text"/>                                               | <input type="text"/>                               | <input type="text"/>                                                                      | <input type="text"/> | <input type="text"/> | <input type="checkbox"/> | <input type="text"/>  |
| (1) CTCAE等级                          | (2) 对研究药物的措施                                                       | (3) 其它措施                                                                   |                          |                                                                         | (4) 与研究药物关系                                                        | (5) AE转归                                           | (6) SAE具体类型                                                                               |                      |                      |                          |                       |
| 1=1级<br>2=2级<br>3=3级<br>4=4级<br>5=5级 | 1=维持目前治疗<br>2=用药暂停<br>3=用药终止<br>4=减小剂量<br>5=不适用<br>6=其它, 请在横线处具体描述 | 1=无<br>2=合并用药, 填写既往/合并药物治疗表<br>3=合并非药物治疗, 填写既往/合并非药物治疗表<br>4=其它, 请在横线处具体描述 |                          |                                                                         | 1=肯定有关<br>2=很可能有关<br>3=可能有关<br>4=可能无关<br>5=肯定无关<br>6=待评价<br>7=无法评价 | 1=未恢复/未治愈<br>2=恢复/治愈<br>3=恢复但留有后遗症<br>4=死亡<br>5=未知 | 1=危及生命<br>2=导致死亡<br>3=需住院治疗或延长目前住院时间<br>4=导致永久或显著的残疾或功能障碍<br>5=导致先天畸形/出生缺陷<br>6=其它重要的医学事件 |                      |                      |                          |                       |

|                             |                  |
|-----------------------------|------------------|
| 研究方案编号: KY2020-29           | <b>既往/合并药物治疗</b> |
| 研究中心编号 <input type="text"/> |                  |

受试者是否有既往/合并药物治疗?  否  是, 请参照表格下方的编码详细填写在下表中。

**既往/合并药物治疗**

| 编号 | 药物名称<br>(通用名) | 适应症<br>(1)           | 适应症<br>备注 | 单次<br>剂量 | 剂量单位<br>(2)          | 给药频率<br>(3)          | 给药途径<br>(4)          | 开始日期                                                                    | 研究结束时是否持续?               |                                                                         | 是否为指南<br>推荐的标准<br>治疗 (5) |
|----|---------------|----------------------|-----------|----------|----------------------|----------------------|----------------------|-------------------------------------------------------------------------|--------------------------|-------------------------------------------------------------------------|--------------------------|
|    |               |                      |           |          |                      |                      |                      |                                                                         | 是                        | 否→结束日期                                                                  |                          |
| 1  |               | <input type="text"/> |           |          | <input type="text"/> | <input type="text"/> | <input type="text"/> | <input type="text"/> 年<br><input type="text"/> 月 <input type="text"/> 日 | <input type="checkbox"/> | <input type="text"/> 年<br><input type="text"/> 月 <input type="text"/> 日 | <input type="text"/>     |
| 2  |               | <input type="text"/> |           |          | <input type="text"/> | <input type="text"/> | <input type="text"/> | <input type="text"/> 年<br><input type="text"/> 月 <input type="text"/> 日 | <input type="checkbox"/> | <input type="text"/> 年<br><input type="text"/> 月 <input type="text"/> 日 | <input type="text"/>     |
| 3  |               | <input type="text"/> |           |          | <input type="text"/> | <input type="text"/> | <input type="text"/> | <input type="text"/> 年<br><input type="text"/> 月 <input type="text"/> 日 | <input type="checkbox"/> | <input type="text"/> 年<br><input type="text"/> 月 <input type="text"/> 日 | <input type="text"/>     |
| 4  |               | <input type="text"/> |           |          | <input type="text"/> | <input type="text"/> | <input type="text"/> | <input type="text"/> 年<br><input type="text"/> 月 <input type="text"/> 日 | <input type="checkbox"/> | <input type="text"/> 年<br><input type="text"/> 月 <input type="text"/> 日 | <input type="text"/>     |
| 5  |               | <input type="text"/> |           |          | <input type="text"/> | <input type="text"/> | <input type="text"/> | <input type="text"/> 年<br><input type="text"/> 月 <input type="text"/> 日 | <input type="checkbox"/> | <input type="text"/> 年<br><input type="text"/> 月 <input type="text"/> 日 | <input type="text"/>     |

| (1) 适应症                                                                                     | (2) 剂量单位                                                 |                                                                | (3) 给药频率                                                               |                                                                   | (4) 给药途径                                                                        |                                                                     | (5) 指南推<br>荐标准治疗    |
|---------------------------------------------------------------------------------------------|----------------------------------------------------------|----------------------------------------------------------------|------------------------------------------------------------------------|-------------------------------------------------------------------|---------------------------------------------------------------------------------|---------------------------------------------------------------------|---------------------|
| 1=本研究疾病<br>2=既往/伴随疾病 (请在备注处<br>填写既往/伴随疾病编号)<br>3=不良事件 (请在备注处填写<br>不良事件编号)<br>4=其它 (请在备注处描述) | 1=微克(µg)<br>2=毫克(mg)<br>3=克(g)<br>4=毫升(mL)<br>5=国际单位(IU) | 6=单位(U)<br>7=片(Tab)<br>8=胶囊(Cap)<br>9=未知<br>10=其它, 请在<br>横线处填写 | 1=每日一次(qd)<br>2=每日二次(bid)<br>3=每日三次(tid)<br>4=每日四次(qid)<br>5=隔日一次(qod) | 6=每周一次(qw)<br>7=睡前(hs)<br>8=按需(prn)<br>9=未知<br>10=其它, 请在横<br>线处填写 | 1=口服(PO)<br>2=静脉滴注(IVgtt)<br>3=静脉注射(IV)<br>4=肌内注射(IM)<br>5=皮下注射(SQ)<br>6=舌下(SL) | 7=局部 (皮肤) (TOP)<br>8=眼(OPH)<br>9=吸入(INH)<br>10=未知<br>11=其它, 请在横线处填写 | 0=否<br>1=是<br>2=不适用 |

|                             |           |
|-----------------------------|-----------|
| 研究方案编号: KY2020-29           | 既往/合并药物治疗 |
| 研究中心编号 <input type="text"/> |           |

受试者筛选号

| 既往/合并药物治疗                                                                                   |               |                      |                                                                                                                                        |          |                      |                                                                                                                                             |                      |                                                                                                                                                                  |                          |                                                                         |                          |
|---------------------------------------------------------------------------------------------|---------------|----------------------|----------------------------------------------------------------------------------------------------------------------------------------|----------|----------------------|---------------------------------------------------------------------------------------------------------------------------------------------|----------------------|------------------------------------------------------------------------------------------------------------------------------------------------------------------|--------------------------|-------------------------------------------------------------------------|--------------------------|
| 编号                                                                                          | 药物名称<br>(通用名) | 适应症<br>(1)           | 适应症<br>备注                                                                                                                              | 单次<br>剂量 | 剂量单位<br>(2)          | 给药频率<br>(3)                                                                                                                                 | 给药途径<br>(4)          | 开始日期                                                                                                                                                             | 研究结束时是否持续?               |                                                                         | 是否为指南<br>推荐的标准<br>治疗 (5) |
|                                                                                             |               |                      |                                                                                                                                        |          |                      |                                                                                                                                             |                      |                                                                                                                                                                  | 是                        | 否→结束日期                                                                  |                          |
|                                                                                             |               | <input type="text"/> |                                                                                                                                        |          | <input type="text"/> | <input type="text"/>                                                                                                                        | <input type="text"/> | <input type="text"/> 年<br><input type="text"/> 月 <input type="text"/> 日                                                                                          | <input type="checkbox"/> | <input type="text"/> 年<br><input type="text"/> 月 <input type="text"/> 日 | <input type="text"/>     |
|                                                                                             |               | <input type="text"/> |                                                                                                                                        |          | <input type="text"/> | <input type="text"/>                                                                                                                        | <input type="text"/> | <input type="text"/> 年<br><input type="text"/> 月 <input type="text"/> 日                                                                                          | <input type="checkbox"/> | <input type="text"/> 年<br><input type="text"/> 月 <input type="text"/> 日 | <input type="text"/>     |
|                                                                                             |               | <input type="text"/> |                                                                                                                                        |          | <input type="text"/> | <input type="text"/>                                                                                                                        | <input type="text"/> | <input type="text"/> 年<br><input type="text"/> 月 <input type="text"/> 日                                                                                          | <input type="checkbox"/> | <input type="text"/> 年<br><input type="text"/> 月 <input type="text"/> 日 | <input type="text"/>     |
|                                                                                             |               | <input type="text"/> |                                                                                                                                        |          | <input type="text"/> | <input type="text"/>                                                                                                                        | <input type="text"/> | <input type="text"/> 年<br><input type="text"/> 月 <input type="text"/> 日                                                                                          | <input type="checkbox"/> | <input type="text"/> 年<br><input type="text"/> 月 <input type="text"/> 日 | <input type="text"/>     |
|                                                                                             |               | <input type="text"/> |                                                                                                                                        |          | <input type="text"/> | <input type="text"/>                                                                                                                        | <input type="text"/> | <input type="text"/> 年<br><input type="text"/> 月 <input type="text"/> 日                                                                                          | <input type="checkbox"/> | <input type="text"/> 年<br><input type="text"/> 月 <input type="text"/> 日 | <input type="text"/>     |
| (1) 适应症                                                                                     |               |                      | (2) 剂量单位                                                                                                                               |          |                      | (3) 给药频率                                                                                                                                    |                      | (4) 给药途径                                                                                                                                                         |                          | (5) 指南推<br>荐标准治疗                                                        |                          |
| 1=本研究疾病<br>2=既往/伴随疾病 (请在备注处<br>填写既往/伴随疾病编号)<br>3=不良事件 (请在备注处填写<br>不良事件编号)<br>4=其它 (请在备注处描述) |               |                      | 1=微克(μg)      6=单位(U)<br>2=毫克(mg)      7=片(Tab)<br>3=克(g)          8=胶囊(Cap)<br>4=毫升(mL)      9=未知<br>5=国际单位(IU)    10=其它, 请在<br>横线处填写 |          |                      | 1=每日一次(qd)    6=每周一次(qw)<br>2=每日二次(bid)    7=睡前(hs)<br>3=每日三次(tid)    8=按需(prn)<br>4=每日四次(qid)    9=未知<br>5=隔日一次(qod)    10=其它, 请在横<br>线处填写 |                      | 1=口服(PO)        7=局部 (皮肤) (TOP)<br>2=静脉滴注(IVgtt)    8=眼(OPH)<br>3=静脉注射(IV)      9=吸入(INH)<br>4=肌内注射(IM)      10=未知<br>5=皮下注射(SQ)      11=其它, 请在横线处填写<br>6=舌下(SL) |                          | 0=否<br>1=是<br>2=不适用                                                     |                          |

|                   |                   |
|-------------------|-------------------|
| 研究方案编号: KY2020-29 | <b>既往/合并非药物治疗</b> |
| 研究中心编号  __   __   |                   |

受试者筛选号 |\_\_| |\_\_| |\_\_| |\_\_| |\_\_|

受试者是否有既往/合并非药物治疗?  否  是, 请填写下表。

**既往/合并非药物治疗**

| 编号 | 治疗名称<br>(请用专业的医学术语描述) | 适应症<br>(1) | 适应症备注 | 开始日期                             | 研究结束时是否持续?               |                                  | 是否为指南推荐的标准治疗<br>(2) |
|----|-----------------------|------------|-------|----------------------------------|--------------------------|----------------------------------|---------------------|
|    |                       |            |       |                                  | 是                        | 否→结束日期                           |                     |
| 1  |                       | __         |       | __   __   __  年  __   __   __  日 | <input type="checkbox"/> | __   __   __  年  __   __   __  日 | __                  |
| 2  |                       | __         |       | __   __   __  年  __   __   __  日 | <input type="checkbox"/> | __   __   __  年  __   __   __  日 | __                  |
| 3  |                       | __         |       | __   __   __  年  __   __   __  日 | <input type="checkbox"/> | __   __   __  年  __   __   __  日 | __                  |
| 4  |                       | __         |       | __   __   __  年  __   __   __  日 | <input type="checkbox"/> | __   __   __  年  __   __   __  日 | __                  |
| 5  |                       | __         |       | __   __   __  年  __   __   __  日 | <input type="checkbox"/> | __   __   __  年  __   __   __  日 | __                  |
| 6  |                       | __         |       | __   __   __  年  __   __   __  日 | <input type="checkbox"/> | __   __   __  年  __   __   __  日 | __                  |
| 7  |                       | __         |       | __   __   __  年  __   __   __  日 | <input type="checkbox"/> | __   __   __  年  __   __   __  日 | __                  |
| 8  |                       | __         |       | __   __   __  年  __   __   __  日 | <input type="checkbox"/> | __   __   __  年  __   __   __  日 | __                  |

(1) 适应症: 1=本研究疾病 2=既往/伴随疾病 (请在备注处填写既往/伴随疾病编号) 3=不良事件 (请在备注处填写不良事件编号) 4=其它 (请在备注处描述)  
(2) 是否为指南推荐的标准治疗: 0=否 1=是 2=不适用





|                             |                             |
|-----------------------------|-----------------------------|
| 研究方案编号: KY2020-29           | <b>IMV/NIV、ECMO、HFNC、氧疗</b> |
| 研究中心编号 <input type="text"/> |                             |

受试者是否有IMV/NIV、ECMO、HFNC、氧疗?  否  是, 请填写下表。

| IMV/NIV、ECMO、HFNC、氧疗 |                                                                                                                                                                                                                          |                                                                      |                                                                    |                                                                      |                                                                    |
|----------------------|--------------------------------------------------------------------------------------------------------------------------------------------------------------------------------------------------------------------------|----------------------------------------------------------------------|--------------------------------------------------------------------|----------------------------------------------------------------------|--------------------------------------------------------------------|
| 编号                   | 治疗名称                                                                                                                                                                                                                     | 治疗开始日期                                                               | 治疗开始时间                                                             | 治疗结束日期                                                               | 治疗结束时间                                                             |
| 1                    | <input type="checkbox"/> <sub>1</sub> IMV <input type="checkbox"/> <sub>3</sub> ECMO<br><input type="checkbox"/> <sub>2</sub> NIV <input type="checkbox"/> <sub>4</sub> HFNC<br><input type="checkbox"/> <sub>5</sub> 氧疗 | <input type="text"/> 年 <input type="text"/> 月 <input type="text"/> 日 | <input type="text"/> : <input type="text"/> : <input type="text"/> | <input type="text"/> 年 <input type="text"/> 月 <input type="text"/> 日 | <input type="text"/> : <input type="text"/> : <input type="text"/> |
| 2                    | <input type="checkbox"/> <sub>1</sub> IMV <input type="checkbox"/> <sub>3</sub> ECMO<br><input type="checkbox"/> <sub>2</sub> NIV <input type="checkbox"/> <sub>4</sub> HFNC<br><input type="checkbox"/> <sub>5</sub> 氧疗 | <input type="text"/> 年 <input type="text"/> 月 <input type="text"/> 日 | <input type="text"/> : <input type="text"/> : <input type="text"/> | <input type="text"/> 年 <input type="text"/> 月 <input type="text"/> 日 | <input type="text"/> : <input type="text"/> : <input type="text"/> |
| 3                    | <input type="checkbox"/> <sub>1</sub> IMV <input type="checkbox"/> <sub>3</sub> ECMO<br><input type="checkbox"/> <sub>2</sub> NIV <input type="checkbox"/> <sub>4</sub> HFNC<br><input type="checkbox"/> <sub>5</sub> 氧疗 | <input type="text"/> 年 <input type="text"/> 月 <input type="text"/> 日 | <input type="text"/> : <input type="text"/> : <input type="text"/> | <input type="text"/> 年 <input type="text"/> 月 <input type="text"/> 日 | <input type="text"/> : <input type="text"/> : <input type="text"/> |
| 4                    | <input type="checkbox"/> <sub>1</sub> IMV <input type="checkbox"/> <sub>3</sub> ECMO<br><input type="checkbox"/> <sub>2</sub> NIV <input type="checkbox"/> <sub>4</sub> HFNC<br><input type="checkbox"/> <sub>5</sub> 氧疗 | <input type="text"/> 年 <input type="text"/> 月 <input type="text"/> 日 | <input type="text"/> : <input type="text"/> : <input type="text"/> | <input type="text"/> 年 <input type="text"/> 月 <input type="text"/> 日 | <input type="text"/> : <input type="text"/> : <input type="text"/> |
| 5                    | <input type="checkbox"/> <sub>1</sub> IMV <input type="checkbox"/> <sub>3</sub> ECMO<br><input type="checkbox"/> <sub>2</sub> NIV <input type="checkbox"/> <sub>4</sub> HFNC<br><input type="checkbox"/> <sub>5</sub> 氧疗 | <input type="text"/> 年 <input type="text"/> 月 <input type="text"/> 日 | <input type="text"/> : <input type="text"/> : <input type="text"/> | <input type="text"/> 年 <input type="text"/> 月 <input type="text"/> 日 | <input type="text"/> : <input type="text"/> : <input type="text"/> |
| 6                    | <input type="checkbox"/> <sub>1</sub> IMV <input type="checkbox"/> <sub>3</sub> ECMO<br><input type="checkbox"/> <sub>2</sub> NIV <input type="checkbox"/> <sub>4</sub> HFNC<br><input type="checkbox"/> <sub>5</sub> 氧疗 | <input type="text"/> 年 <input type="text"/> 月 <input type="text"/> 日 | <input type="text"/> : <input type="text"/> : <input type="text"/> | <input type="text"/> 年 <input type="text"/> 月 <input type="text"/> 日 | <input type="text"/> : <input type="text"/> : <input type="text"/> |
| 7                    | <input type="checkbox"/> <sub>1</sub> IMV <input type="checkbox"/> <sub>3</sub> ECMO<br><input type="checkbox"/> <sub>2</sub> NIV <input type="checkbox"/> <sub>4</sub> HFNC<br><input type="checkbox"/> <sub>5</sub> 氧疗 | <input type="text"/> 年 <input type="text"/> 月 <input type="text"/> 日 | <input type="text"/> : <input type="text"/> : <input type="text"/> | <input type="text"/> 年 <input type="text"/> 月 <input type="text"/> 日 | <input type="text"/> : <input type="text"/> : <input type="text"/> |

|                                     |                             |
|-------------------------------------|-----------------------------|
| 研究方案编号: KY2020-29                   | <b>IMV/NIV、ECMO、HFNC、氧疗</b> |
| 研究中心编号  __   __   __   __           |                             |
| 受试者筛选号  __   __   __   __   __   __ |                             |

| IMV/NIV、ECMO、HFNC、氧疗 |                                                                                                                                                                                                                          |                                              |                     |                                              |                     |
|----------------------|--------------------------------------------------------------------------------------------------------------------------------------------------------------------------------------------------------------------------|----------------------------------------------|---------------------|----------------------------------------------|---------------------|
| 编号                   | 治疗名称                                                                                                                                                                                                                     | 治疗开始日期                                       | 治疗开始时间              | 治疗结束日期                                       | 治疗结束时间              |
|                      | <input type="checkbox"/> <sub>1</sub> IMV <input type="checkbox"/> <sub>3</sub> ECMO<br><input type="checkbox"/> <sub>2</sub> NIV <input type="checkbox"/> <sub>4</sub> HFNC<br><input type="checkbox"/> <sub>5</sub> 氧疗 | __   __   __   __  年  __   __  月  __   __  日 | __   __  :  __   __ | __   __   __   __  年  __   __  月  __   __  日 | __   __  :  __   __ |
|                      | <input type="checkbox"/> <sub>1</sub> IMV <input type="checkbox"/> <sub>3</sub> ECMO<br><input type="checkbox"/> <sub>2</sub> NIV <input type="checkbox"/> <sub>4</sub> HFNC<br><input type="checkbox"/> <sub>5</sub> 氧疗 | __   __   __   __  年  __   __  月  __   __  日 | __   __  :  __   __ | __   __   __   __  年  __   __  月  __   __  日 | __   __  :  __   __ |
|                      | <input type="checkbox"/> <sub>1</sub> IMV <input type="checkbox"/> <sub>3</sub> ECMO<br><input type="checkbox"/> <sub>2</sub> NIV <input type="checkbox"/> <sub>4</sub> HFNC<br><input type="checkbox"/> <sub>5</sub> 氧疗 | __   __   __   __  年  __   __  月  __   __  日 | __   __  :  __   __ | __   __   __   __  年  __   __  月  __   __  日 | __   __  :  __   __ |
|                      | <input type="checkbox"/> <sub>1</sub> IMV <input type="checkbox"/> <sub>3</sub> ECMO<br><input type="checkbox"/> <sub>2</sub> NIV <input type="checkbox"/> <sub>4</sub> HFNC<br><input type="checkbox"/> <sub>5</sub> 氧疗 | __   __   __   __  年  __   __  月  __   __  日 | __   __  :  __   __ | __   __   __   __  年  __   __  月  __   __  日 | __   __  :  __   __ |
|                      | <input type="checkbox"/> <sub>1</sub> IMV <input type="checkbox"/> <sub>3</sub> ECMO<br><input type="checkbox"/> <sub>2</sub> NIV <input type="checkbox"/> <sub>4</sub> HFNC<br><input type="checkbox"/> <sub>5</sub> 氧疗 | __   __   __   __  年  __   __  月  __   __  日 | __   __  :  __   __ | __   __   __   __  年  __   __  月  __   __  日 | __   __  :  __   __ |
|                      | <input type="checkbox"/> <sub>1</sub> IMV <input type="checkbox"/> <sub>3</sub> ECMO<br><input type="checkbox"/> <sub>2</sub> NIV <input type="checkbox"/> <sub>4</sub> HFNC<br><input type="checkbox"/> <sub>5</sub> 氧疗 | __   __   __   __  年  __   __  月  __   __  日 | __   __  :  __   __ | __   __   __   __  年  __   __  月  __   __  日 | __   __  :  __   __ |
|                      | <input type="checkbox"/> <sub>1</sub> IMV <input type="checkbox"/> <sub>3</sub> ECMO<br><input type="checkbox"/> <sub>2</sub> NIV <input type="checkbox"/> <sub>4</sub> HFNC<br><input type="checkbox"/> <sub>5</sub> 氧疗 | __   __   __   __  年  __   __  月  __   __  日 | __   __  :  __   __ | __   __   __   __  年  __   __  月  __   __  日 | __   __  :  __   __ |
|                      | <input type="checkbox"/> <sub>1</sub> IMV <input type="checkbox"/> <sub>3</sub> ECMO<br><input type="checkbox"/> <sub>2</sub> NIV <input type="checkbox"/> <sub>4</sub> HFNC<br><input type="checkbox"/> <sub>5</sub> 氧疗 | __   __   __   __  年  __   __  月  __   __  日 | __   __  :  __   __ | __   __   __   __  年  __   __  月  __   __  日 | __   __  :  __   __ |





|                                                      |             |
|------------------------------------------------------|-------------|
| 研究方案编号: KY2020-29                                    | <b>研究总结</b> |
| 研究中心编号  __   __  受试者筛选号  __   __   __   __   __   __ |             |

| 研究总结                                                                                                                                                                                                                                                                                                                                                                                                                                                                                                                                                                           |
|--------------------------------------------------------------------------------------------------------------------------------------------------------------------------------------------------------------------------------------------------------------------------------------------------------------------------------------------------------------------------------------------------------------------------------------------------------------------------------------------------------------------------------------------------------------------------------|
| <p>受试者是否按研究方案完成了研究?</p> <p><input type="checkbox"/><sub>1</sub> 是, 完成日期:  __   __   __   __  年  __   __  月  __   __  日</p> <p><input type="checkbox"/><sub>0</sub> 否, 终止日期:  __   __   __   __  年  __   __  月  __   __  日</p>                                                                                                                                                                                                                                                                                                                                                  |
| <p>如提前退出研究, 请选择最重要的原因 (单选):</p> <p><input type="checkbox"/><sub>1</sub> 研究期间出现疾病恶化, 经研究者综合评估后需要改变治疗</p> <p><input type="checkbox"/><sub>2</sub> 药物不良事件导致病情加重的出现</p> <p><input type="checkbox"/><sub>3</sub> 患者不愿意继续使用研究药物</p> <p><input type="checkbox"/><sub>4</sub> 妊娠</p> <p><input type="checkbox"/><sub>5</sub> 受试者失访</p> <p><input type="checkbox"/><sub>6</sub> 受试者死亡</p> <p><input type="checkbox"/><sub>7</sub> 受试者撤回知情同意</p> <p><input type="checkbox"/><sub>8</sub> 研究整体中止</p> <p><input type="checkbox"/><sub>9</sub> 其他, 请描述: _____</p> <p>_____</p> <p>_____</p> |
| <p>备注 (请记录其他需要补充说明的事由):</p> <p>_____</p> <p>_____</p> <p>_____</p>                                                                                                                                                                                                                                                                                                                                                                                                                                                                                                             |



|                             |    |
|-----------------------------|----|
| 研究方案编号: KY2020-29           | 死亡 |
| 研究中心编号 <input type="text"/> |    |

| 死亡                                                                                                                                                                     |
|------------------------------------------------------------------------------------------------------------------------------------------------------------------------|
| 受试者是否死亡? <input type="checkbox"/> <sub>0</sub> 否 <input type="checkbox"/> <sub>1</sub> 是, 请填写。 <input type="checkbox"/> <sub>2</sub> 未知                                |
| 死亡日期: <input type="text"/> 年 <input type="text"/> 月 <input type="text"/> 日                                                                                             |
| 死亡原因: <input type="checkbox"/> <sub>1</sub> 不良事件<br><input type="checkbox"/> <sub>2</sub> 未知<br><input type="checkbox"/> <sub>3</sub> 其他, 请描述: _____<br>_____<br>_____ |

|                             |                 |
|-----------------------------|-----------------|
| 研究方案编号: KY2020-29           | <b>CRF 审核声明</b> |
| 研究中心编号 <input type="text"/> |                 |

| 研究者声明                                                                                                                                                            |
|------------------------------------------------------------------------------------------------------------------------------------------------------------------|
| <p>我已审核并确认此病例报告中记录的所有数据均真实、准确、可靠、完整无误，并与原始资料一致，所有错误或遗漏均已得到更正或注明。</p> <p>主要研究者签字: _____ 签字日期: <input type="text"/>年<input type="text"/>月<input type="text"/>日</p> |

| CRA 声明                                                                                                                                         |
|------------------------------------------------------------------------------------------------------------------------------------------------|
| <p>我已核对并确认此病例报告中记录的所有数据均真实、准确、可靠、完整无误，并与原始资料一致。</p> <p>CRA 签字: _____ 签字日期: <input type="text"/>年<input type="text"/>月<input type="text"/>日</p> |







|                                                                                            |                 |
|--------------------------------------------------------------------------------------------|-----------------|
| 研究方案编号: KY2020-29                                                                          | <b>附表-计划外检查</b> |
| 研究中心编号 <input type="text"/> <input type="text"/> <input type="text"/> <input type="text"/> |                 |

|                                                                                                                                                                                     |
|-------------------------------------------------------------------------------------------------------------------------------------------------------------------------------------|
| <b>有无呼吸道症状</b> <input type="checkbox"/> <sub>0</sub> 未查, 原因 _____                                                                                                                   |
| 检查日期: <input type="text"/> <input type="text"/> <input type="text"/> <input type="text"/> 年 <input type="text"/> <input type="text"/> 月 <input type="text"/> <input type="text"/> 日 |
| 受试者有无呼吸道症状: <input type="checkbox"/> <sub>0</sub> 无 <input type="checkbox"/> <sub>1</sub> 有, 请描述: _____                                                                             |

|                                                                                                                                                                                     |
|-------------------------------------------------------------------------------------------------------------------------------------------------------------------------------------|
| <b>有无呼吸道症状</b> <input type="checkbox"/> <sub>0</sub> 未查, 原因 _____                                                                                                                   |
| 检查日期: <input type="text"/> <input type="text"/> <input type="text"/> <input type="text"/> 年 <input type="text"/> <input type="text"/> 月 <input type="text"/> <input type="text"/> 日 |
| 受试者有无呼吸道症状: <input type="checkbox"/> <sub>0</sub> 无 <input type="checkbox"/> <sub>1</sub> 有, 请描述: _____                                                                             |

|                                                                                                                                                                                     |
|-------------------------------------------------------------------------------------------------------------------------------------------------------------------------------------|
| <b>有无呼吸道症状</b> <input type="checkbox"/> <sub>0</sub> 未查, 原因 _____                                                                                                                   |
| 检查日期: <input type="text"/> <input type="text"/> <input type="text"/> <input type="text"/> 年 <input type="text"/> <input type="text"/> 月 <input type="text"/> <input type="text"/> 日 |
| 受试者有无呼吸道症状: <input type="checkbox"/> <sub>0</sub> 无 <input type="checkbox"/> <sub>1</sub> 有, 请描述: _____                                                                             |

|                                                                                                                                                                                     |
|-------------------------------------------------------------------------------------------------------------------------------------------------------------------------------------|
| <b>有无呼吸道症状</b> <input type="checkbox"/> <sub>0</sub> 未查, 原因 _____                                                                                                                   |
| 检查日期: <input type="text"/> <input type="text"/> <input type="text"/> <input type="text"/> 年 <input type="text"/> <input type="text"/> 月 <input type="text"/> <input type="text"/> 日 |
| 受试者有无呼吸道症状: <input type="checkbox"/> <sub>0</sub> 无 <input type="checkbox"/> <sub>1</sub> 有, 请描述: _____                                                                             |

|                                                                                                                                                                                     |
|-------------------------------------------------------------------------------------------------------------------------------------------------------------------------------------|
| <b>有无呼吸道症状</b> <input type="checkbox"/> <sub>0</sub> 未查, 原因 _____                                                                                                                   |
| 检查日期: <input type="text"/> <input type="text"/> <input type="text"/> <input type="text"/> 年 <input type="text"/> <input type="text"/> 月 <input type="text"/> <input type="text"/> 日 |
| 受试者有无呼吸道症状: <input type="checkbox"/> <sub>0</sub> 无 <input type="checkbox"/> <sub>1</sub> 有, 请描述: _____                                                                             |

|                                                                                                                                                                                     |
|-------------------------------------------------------------------------------------------------------------------------------------------------------------------------------------|
| <b>有无呼吸道症状</b> <input type="checkbox"/> <sub>0</sub> 未查, 原因 _____                                                                                                                   |
| 检查日期: <input type="text"/> <input type="text"/> <input type="text"/> <input type="text"/> 年 <input type="text"/> <input type="text"/> 月 <input type="text"/> <input type="text"/> 日 |
| 受试者有无呼吸道症状: <input type="checkbox"/> <sub>0</sub> 无 <input type="checkbox"/> <sub>1</sub> 有, 请描述: _____                                                                             |

|                                                                                                                                                                                     |
|-------------------------------------------------------------------------------------------------------------------------------------------------------------------------------------|
| <b>有无呼吸道症状</b> <input type="checkbox"/> <sub>0</sub> 未查, 原因 _____                                                                                                                   |
| 检查日期: <input type="text"/> <input type="text"/> <input type="text"/> <input type="text"/> 年 <input type="text"/> <input type="text"/> 月 <input type="text"/> <input type="text"/> 日 |
| 受试者有无呼吸道症状: <input type="checkbox"/> <sub>0</sub> 无 <input type="checkbox"/> <sub>1</sub> 有, 请描述: _____                                                                             |

|                                                                                            |                 |
|--------------------------------------------------------------------------------------------|-----------------|
| 研究方案编号: KY2020-29                                                                          | <b>附表-计划外检查</b> |
| 研究中心编号 <input style="width: 40px;" type="text"/> <input style="width: 40px;" type="text"/> |                 |

| <b>血常规</b> <input type="checkbox"/> <sub>0</sub> 未查, 原因 _____                                                                                                                                                                                                                                                     |      |                                                                                                           |                                       |                                                                                                                                        |                                       |                                       |
|-------------------------------------------------------------------------------------------------------------------------------------------------------------------------------------------------------------------------------------------------------------------------------------------------------------------|------|-----------------------------------------------------------------------------------------------------------|---------------------------------------|----------------------------------------------------------------------------------------------------------------------------------------|---------------------------------------|---------------------------------------|
| 采样日期: <input style="width: 40px;" type="text"/> <input style="width: 40px;" type="text"/> <input style="width: 40px;" type="text"/> 年 <input style="width: 40px;" type="text"/> <input style="width: 40px;" type="text"/> 月 <input style="width: 40px;" type="text"/> <input style="width: 40px;" type="text"/> 日 |      |                                                                                                           |                                       | 正常值范围编号: <input style="width: 40px;" type="text"/> <input style="width: 40px;" type="text"/> <input style="width: 40px;" type="text"/> |                                       |                                       |
| 检查项目                                                                                                                                                                                                                                                                                                              | 测量结果 |                                                                                                           | 结果判定                                  |                                                                                                                                        |                                       | 未查                                    |
|                                                                                                                                                                                                                                                                                                                   | 实测值  | 单位                                                                                                        | 正常                                    | 异常                                                                                                                                     |                                       |                                       |
|                                                                                                                                                                                                                                                                                                                   |      |                                                                                                           |                                       | 无临床意义                                                                                                                                  | 有临床意义                                 |                                       |
| 红细胞计数 (RBC)                                                                                                                                                                                                                                                                                                       |      | <input type="checkbox"/> <sub>1</sub> 10 <sup>12</sup> /L <input type="checkbox"/> <sub>2</sub> 其他: _____ | <input type="checkbox"/> <sub>1</sub> | <input type="checkbox"/> <sub>2</sub>                                                                                                  | <input type="checkbox"/> <sub>3</sub> | <input type="checkbox"/> <sub>0</sub> |
| 白细胞计数 (WBC)                                                                                                                                                                                                                                                                                                       |      | <input type="checkbox"/> <sub>1</sub> 10 <sup>9</sup> /L <input type="checkbox"/> <sub>2</sub> 其他: _____  | <input type="checkbox"/> <sub>1</sub> | <input type="checkbox"/> <sub>2</sub>                                                                                                  | <input type="checkbox"/> <sub>3</sub> | <input type="checkbox"/> <sub>0</sub> |
| 血红蛋白 (Hb)                                                                                                                                                                                                                                                                                                         |      | <input type="checkbox"/> <sub>1</sub> g/L <input type="checkbox"/> <sub>2</sub> 其他: _____                 | <input type="checkbox"/> <sub>1</sub> | <input type="checkbox"/> <sub>2</sub>                                                                                                  | <input type="checkbox"/> <sub>3</sub> | <input type="checkbox"/> <sub>0</sub> |
| 血小板计数 (PLT)                                                                                                                                                                                                                                                                                                       |      | <input type="checkbox"/> <sub>1</sub> 10 <sup>9</sup> /L <input type="checkbox"/> <sub>2</sub> 其他: _____  | <input type="checkbox"/> <sub>1</sub> | <input type="checkbox"/> <sub>2</sub>                                                                                                  | <input type="checkbox"/> <sub>3</sub> | <input type="checkbox"/> <sub>0</sub> |
| 中性粒细胞计数 (ANC)                                                                                                                                                                                                                                                                                                     |      | <input type="checkbox"/> <sub>1</sub> 10 <sup>9</sup> /L <input type="checkbox"/> <sub>2</sub> 其他: _____  | <input type="checkbox"/> <sub>1</sub> | <input type="checkbox"/> <sub>2</sub>                                                                                                  | <input type="checkbox"/> <sub>3</sub> | <input type="checkbox"/> <sub>0</sub> |
| 淋巴细胞计数 (LY)                                                                                                                                                                                                                                                                                                       |      | <input type="checkbox"/> <sub>1</sub> 10 <sup>9</sup> /L <input type="checkbox"/> <sub>2</sub> 其他: _____  | <input type="checkbox"/> <sub>1</sub> | <input type="checkbox"/> <sub>2</sub>                                                                                                  | <input type="checkbox"/> <sub>3</sub> | <input type="checkbox"/> <sub>0</sub> |
| 单核细胞计数 (MO)                                                                                                                                                                                                                                                                                                       |      | <input type="checkbox"/> <sub>1</sub> 10 <sup>9</sup> /L <input type="checkbox"/> <sub>2</sub> 其他: _____  | <input type="checkbox"/> <sub>1</sub> | <input type="checkbox"/> <sub>2</sub>                                                                                                  | <input type="checkbox"/> <sub>3</sub> | <input type="checkbox"/> <sub>0</sub> |
| 嗜酸性粒细胞计数 (EO)                                                                                                                                                                                                                                                                                                     |      | <input type="checkbox"/> <sub>1</sub> 10 <sup>9</sup> /L <input type="checkbox"/> <sub>2</sub> 其他: _____  | <input type="checkbox"/> <sub>1</sub> | <input type="checkbox"/> <sub>2</sub>                                                                                                  | <input type="checkbox"/> <sub>3</sub> | <input type="checkbox"/> <sub>0</sub> |
| 嗜碱性粒细胞计数 (BA)                                                                                                                                                                                                                                                                                                     |      | <input type="checkbox"/> <sub>1</sub> 10 <sup>9</sup> /L <input type="checkbox"/> <sub>2</sub> 其他: _____  | <input type="checkbox"/> <sub>1</sub> | <input type="checkbox"/> <sub>2</sub>                                                                                                  | <input type="checkbox"/> <sub>3</sub> | <input type="checkbox"/> <sub>0</sub> |

| <b>血常规</b> <input type="checkbox"/> <sub>0</sub> 未查, 原因 _____                                                                                                                                                                                                                                                     |      |                                                                                                           |                                       |                                                                                                                                        |                                       |                                       |
|-------------------------------------------------------------------------------------------------------------------------------------------------------------------------------------------------------------------------------------------------------------------------------------------------------------------|------|-----------------------------------------------------------------------------------------------------------|---------------------------------------|----------------------------------------------------------------------------------------------------------------------------------------|---------------------------------------|---------------------------------------|
| 采样日期: <input style="width: 40px;" type="text"/> <input style="width: 40px;" type="text"/> <input style="width: 40px;" type="text"/> 年 <input style="width: 40px;" type="text"/> <input style="width: 40px;" type="text"/> 月 <input style="width: 40px;" type="text"/> <input style="width: 40px;" type="text"/> 日 |      |                                                                                                           |                                       | 正常值范围编号: <input style="width: 40px;" type="text"/> <input style="width: 40px;" type="text"/> <input style="width: 40px;" type="text"/> |                                       |                                       |
| 检查项目                                                                                                                                                                                                                                                                                                              | 测量结果 |                                                                                                           | 结果判定                                  |                                                                                                                                        |                                       | 未查                                    |
|                                                                                                                                                                                                                                                                                                                   | 实测值  | 单位                                                                                                        | 正常                                    | 异常                                                                                                                                     |                                       |                                       |
|                                                                                                                                                                                                                                                                                                                   |      |                                                                                                           |                                       | 无临床意义                                                                                                                                  | 有临床意义                                 |                                       |
| 红细胞计数 (RBC)                                                                                                                                                                                                                                                                                                       |      | <input type="checkbox"/> <sub>1</sub> 10 <sup>12</sup> /L <input type="checkbox"/> <sub>2</sub> 其他: _____ | <input type="checkbox"/> <sub>1</sub> | <input type="checkbox"/> <sub>2</sub>                                                                                                  | <input type="checkbox"/> <sub>3</sub> | <input type="checkbox"/> <sub>0</sub> |
| 白细胞计数 (WBC)                                                                                                                                                                                                                                                                                                       |      | <input type="checkbox"/> <sub>1</sub> 10 <sup>9</sup> /L <input type="checkbox"/> <sub>2</sub> 其他: _____  | <input type="checkbox"/> <sub>1</sub> | <input type="checkbox"/> <sub>2</sub>                                                                                                  | <input type="checkbox"/> <sub>3</sub> | <input type="checkbox"/> <sub>0</sub> |
| 血红蛋白 (Hb)                                                                                                                                                                                                                                                                                                         |      | <input type="checkbox"/> <sub>1</sub> g/L <input type="checkbox"/> <sub>2</sub> 其他: _____                 | <input type="checkbox"/> <sub>1</sub> | <input type="checkbox"/> <sub>2</sub>                                                                                                  | <input type="checkbox"/> <sub>3</sub> | <input type="checkbox"/> <sub>0</sub> |
| 血小板计数 (PLT)                                                                                                                                                                                                                                                                                                       |      | <input type="checkbox"/> <sub>1</sub> 10 <sup>9</sup> /L <input type="checkbox"/> <sub>2</sub> 其他: _____  | <input type="checkbox"/> <sub>1</sub> | <input type="checkbox"/> <sub>2</sub>                                                                                                  | <input type="checkbox"/> <sub>3</sub> | <input type="checkbox"/> <sub>0</sub> |
| 中性粒细胞计数 (ANC)                                                                                                                                                                                                                                                                                                     |      | <input type="checkbox"/> <sub>1</sub> 10 <sup>9</sup> /L <input type="checkbox"/> <sub>2</sub> 其他: _____  | <input type="checkbox"/> <sub>1</sub> | <input type="checkbox"/> <sub>2</sub>                                                                                                  | <input type="checkbox"/> <sub>3</sub> | <input type="checkbox"/> <sub>0</sub> |
| 淋巴细胞计数 (LY)                                                                                                                                                                                                                                                                                                       |      | <input type="checkbox"/> <sub>1</sub> 10 <sup>9</sup> /L <input type="checkbox"/> <sub>2</sub> 其他: _____  | <input type="checkbox"/> <sub>1</sub> | <input type="checkbox"/> <sub>2</sub>                                                                                                  | <input type="checkbox"/> <sub>3</sub> | <input type="checkbox"/> <sub>0</sub> |
| 单核细胞计数 (MO)                                                                                                                                                                                                                                                                                                       |      | <input type="checkbox"/> <sub>1</sub> 10 <sup>9</sup> /L <input type="checkbox"/> <sub>2</sub> 其他: _____  | <input type="checkbox"/> <sub>1</sub> | <input type="checkbox"/> <sub>2</sub>                                                                                                  | <input type="checkbox"/> <sub>3</sub> | <input type="checkbox"/> <sub>0</sub> |
| 嗜酸性粒细胞计数 (EO)                                                                                                                                                                                                                                                                                                     |      | <input type="checkbox"/> <sub>1</sub> 10 <sup>9</sup> /L <input type="checkbox"/> <sub>2</sub> 其他: _____  | <input type="checkbox"/> <sub>1</sub> | <input type="checkbox"/> <sub>2</sub>                                                                                                  | <input type="checkbox"/> <sub>3</sub> | <input type="checkbox"/> <sub>0</sub> |
| 嗜碱性粒细胞计数 (BA)                                                                                                                                                                                                                                                                                                     |      | <input type="checkbox"/> <sub>1</sub> 10 <sup>9</sup> /L <input type="checkbox"/> <sub>2</sub> 其他: _____  | <input type="checkbox"/> <sub>1</sub> | <input type="checkbox"/> <sub>2</sub>                                                                                                  | <input type="checkbox"/> <sub>3</sub> | <input type="checkbox"/> <sub>0</sub> |

|                                                                                            |                 |
|--------------------------------------------------------------------------------------------|-----------------|
| 研究方案编号: KY2020-29                                                                          | <b>附表-计划外检查</b> |
| 研究中心编号 <input style="width: 40px;" type="text"/> <input style="width: 40px;" type="text"/> |                 |

| <b>血生化</b> <input type="checkbox"/> 未查, 原因 _____                                                                                                                                                                                                                       |      |                                                                                              |                                       |                                                                                                                                                                                  |                                       |                                       |
|------------------------------------------------------------------------------------------------------------------------------------------------------------------------------------------------------------------------------------------------------------------------|------|----------------------------------------------------------------------------------------------|---------------------------------------|----------------------------------------------------------------------------------------------------------------------------------------------------------------------------------|---------------------------------------|---------------------------------------|
| 采样日期 <input style="width: 40px;" type="text"/> <input style="width: 40px;" type="text"/> 年 <input style="width: 40px;" type="text"/> <input style="width: 40px;" type="text"/> 月 <input style="width: 40px;" type="text"/> <input style="width: 40px;" type="text"/> 日 |      |                                                                                              |                                       | 正常值范围编号: <input style="width: 40px;" type="text"/> <input style="width: 40px;" type="text"/> <input style="width: 40px;" type="text"/> <input style="width: 40px;" type="text"/> |                                       |                                       |
| 检查项目                                                                                                                                                                                                                                                                   | 测量结果 |                                                                                              | 结果判定                                  |                                                                                                                                                                                  |                                       | 未查                                    |
|                                                                                                                                                                                                                                                                        | 实测值  | 单位                                                                                           | 正常                                    | 异常                                                                                                                                                                               |                                       |                                       |
|                                                                                                                                                                                                                                                                        |      |                                                                                              |                                       | 无临床意义                                                                                                                                                                            | 有临床意义                                 |                                       |
| 谷丙转氨酶 (ALT)                                                                                                                                                                                                                                                            |      | <input type="checkbox"/> <sub>1</sub> U/L <input type="checkbox"/> <sub>2</sub> 其他: _____    | <input type="checkbox"/> <sub>1</sub> | <input type="checkbox"/> <sub>2</sub>                                                                                                                                            | <input type="checkbox"/> <sub>3</sub> | <input type="checkbox"/> <sub>0</sub> |
| 谷草转氨酶 (AST)                                                                                                                                                                                                                                                            |      | <input type="checkbox"/> <sub>1</sub> U/L <input type="checkbox"/> <sub>2</sub> 其他: _____    | <input type="checkbox"/> <sub>1</sub> | <input type="checkbox"/> <sub>2</sub>                                                                                                                                            | <input type="checkbox"/> <sub>3</sub> | <input type="checkbox"/> <sub>0</sub> |
| 总胆红素 (TBIL)                                                                                                                                                                                                                                                            |      | <input type="checkbox"/> <sub>1</sub> μmol/L <input type="checkbox"/> <sub>2</sub> 其他: _____ | <input type="checkbox"/> <sub>1</sub> | <input type="checkbox"/> <sub>2</sub>                                                                                                                                            | <input type="checkbox"/> <sub>3</sub> | <input type="checkbox"/> <sub>0</sub> |
| 白蛋白 (ALB)                                                                                                                                                                                                                                                              |      | <input type="checkbox"/> <sub>1</sub> g/L <input type="checkbox"/> <sub>2</sub> 其他: _____    | <input type="checkbox"/> <sub>1</sub> | <input type="checkbox"/> <sub>2</sub>                                                                                                                                            | <input type="checkbox"/> <sub>3</sub> | <input type="checkbox"/> <sub>0</sub> |
| γ-谷氨酰转肽酶 (GGT)                                                                                                                                                                                                                                                         |      | <input type="checkbox"/> <sub>1</sub> U/L <input type="checkbox"/> <sub>2</sub> 其他: _____    | <input type="checkbox"/> <sub>1</sub> | <input type="checkbox"/> <sub>2</sub>                                                                                                                                            | <input type="checkbox"/> <sub>3</sub> | <input type="checkbox"/> <sub>0</sub> |
| 乳酸脱氢酶 (LDH)                                                                                                                                                                                                                                                            |      | <input type="checkbox"/> <sub>1</sub> U/L <input type="checkbox"/> <sub>2</sub> 其他: _____    | <input type="checkbox"/> <sub>1</sub> | <input type="checkbox"/> <sub>2</sub>                                                                                                                                            | <input type="checkbox"/> <sub>3</sub> | <input type="checkbox"/> <sub>0</sub> |
| 肌酸激酶 (CK)                                                                                                                                                                                                                                                              |      | <input type="checkbox"/> <sub>1</sub> U/L <input type="checkbox"/> <sub>2</sub> 其他: _____    | <input type="checkbox"/> <sub>1</sub> | <input type="checkbox"/> <sub>2</sub>                                                                                                                                            | <input type="checkbox"/> <sub>3</sub> | <input type="checkbox"/> <sub>0</sub> |
| 肌酸激酶同工酶 (CK-MB)                                                                                                                                                                                                                                                        |      | <input type="checkbox"/> <sub>1</sub> U/L <input type="checkbox"/> <sub>2</sub> 其他: _____    | <input type="checkbox"/> <sub>1</sub> | <input type="checkbox"/> <sub>2</sub>                                                                                                                                            | <input type="checkbox"/> <sub>3</sub> | <input type="checkbox"/> <sub>0</sub> |
| 血尿素氮 (BUN)                                                                                                                                                                                                                                                             |      | <input type="checkbox"/> <sub>1</sub> mmol/L <input type="checkbox"/> <sub>2</sub> 其他: _____ | <input type="checkbox"/> <sub>1</sub> | <input type="checkbox"/> <sub>2</sub>                                                                                                                                            | <input type="checkbox"/> <sub>3</sub> | <input type="checkbox"/> <sub>0</sub> |
| 尿素 (Urea)                                                                                                                                                                                                                                                              |      | <input type="checkbox"/> <sub>1</sub> mmol/L <input type="checkbox"/> <sub>2</sub> 其他: _____ | <input type="checkbox"/> <sub>1</sub> | <input type="checkbox"/> <sub>2</sub>                                                                                                                                            | <input type="checkbox"/> <sub>3</sub> | <input type="checkbox"/> <sub>0</sub> |
| 血肌酐 (CR)                                                                                                                                                                                                                                                               |      | <input type="checkbox"/> <sub>1</sub> μmol/L <input type="checkbox"/> <sub>2</sub> 其他: _____ | <input type="checkbox"/> <sub>1</sub> | <input type="checkbox"/> <sub>2</sub>                                                                                                                                            | <input type="checkbox"/> <sub>3</sub> | <input type="checkbox"/> <sub>0</sub> |

| <b>血生化</b> <input type="checkbox"/> 未查, 原因 _____                                                                                                                                                                                                                       |      |                                                                                              |                                       |                                                                                                                                                                                  |                                       |                                       |
|------------------------------------------------------------------------------------------------------------------------------------------------------------------------------------------------------------------------------------------------------------------------|------|----------------------------------------------------------------------------------------------|---------------------------------------|----------------------------------------------------------------------------------------------------------------------------------------------------------------------------------|---------------------------------------|---------------------------------------|
| 采样日期 <input style="width: 40px;" type="text"/> <input style="width: 40px;" type="text"/> 年 <input style="width: 40px;" type="text"/> <input style="width: 40px;" type="text"/> 月 <input style="width: 40px;" type="text"/> <input style="width: 40px;" type="text"/> 日 |      |                                                                                              |                                       | 正常值范围编号: <input style="width: 40px;" type="text"/> <input style="width: 40px;" type="text"/> <input style="width: 40px;" type="text"/> <input style="width: 40px;" type="text"/> |                                       |                                       |
| 检查项目                                                                                                                                                                                                                                                                   | 测量结果 |                                                                                              | 结果判定                                  |                                                                                                                                                                                  |                                       | 未查                                    |
|                                                                                                                                                                                                                                                                        | 实测值  | 单位                                                                                           | 正常                                    | 异常                                                                                                                                                                               |                                       |                                       |
|                                                                                                                                                                                                                                                                        |      |                                                                                              |                                       | 无临床意义                                                                                                                                                                            | 有临床意义                                 |                                       |
| 谷丙转氨酶 (ALT)                                                                                                                                                                                                                                                            |      | <input type="checkbox"/> <sub>1</sub> U/L <input type="checkbox"/> <sub>2</sub> 其他: _____    | <input type="checkbox"/> <sub>1</sub> | <input type="checkbox"/> <sub>2</sub>                                                                                                                                            | <input type="checkbox"/> <sub>3</sub> | <input type="checkbox"/> <sub>0</sub> |
| 谷草转氨酶 (AST)                                                                                                                                                                                                                                                            |      | <input type="checkbox"/> <sub>1</sub> U/L <input type="checkbox"/> <sub>2</sub> 其他: _____    | <input type="checkbox"/> <sub>1</sub> | <input type="checkbox"/> <sub>2</sub>                                                                                                                                            | <input type="checkbox"/> <sub>3</sub> | <input type="checkbox"/> <sub>0</sub> |
| 总胆红素 (TBIL)                                                                                                                                                                                                                                                            |      | <input type="checkbox"/> <sub>1</sub> μmol/L <input type="checkbox"/> <sub>2</sub> 其他: _____ | <input type="checkbox"/> <sub>1</sub> | <input type="checkbox"/> <sub>2</sub>                                                                                                                                            | <input type="checkbox"/> <sub>3</sub> | <input type="checkbox"/> <sub>0</sub> |
| 白蛋白 (ALB)                                                                                                                                                                                                                                                              |      | <input type="checkbox"/> <sub>1</sub> g/L <input type="checkbox"/> <sub>2</sub> 其他: _____    | <input type="checkbox"/> <sub>1</sub> | <input type="checkbox"/> <sub>2</sub>                                                                                                                                            | <input type="checkbox"/> <sub>3</sub> | <input type="checkbox"/> <sub>0</sub> |
| γ-谷氨酰转肽酶 (GGT)                                                                                                                                                                                                                                                         |      | <input type="checkbox"/> <sub>1</sub> U/L <input type="checkbox"/> <sub>2</sub> 其他: _____    | <input type="checkbox"/> <sub>1</sub> | <input type="checkbox"/> <sub>2</sub>                                                                                                                                            | <input type="checkbox"/> <sub>3</sub> | <input type="checkbox"/> <sub>0</sub> |
| 乳酸脱氢酶 (LDH)                                                                                                                                                                                                                                                            |      | <input type="checkbox"/> <sub>1</sub> U/L <input type="checkbox"/> <sub>2</sub> 其他: _____    | <input type="checkbox"/> <sub>1</sub> | <input type="checkbox"/> <sub>2</sub>                                                                                                                                            | <input type="checkbox"/> <sub>3</sub> | <input type="checkbox"/> <sub>0</sub> |
| 肌酸激酶 (CK)                                                                                                                                                                                                                                                              |      | <input type="checkbox"/> <sub>1</sub> U/L <input type="checkbox"/> <sub>2</sub> 其他: _____    | <input type="checkbox"/> <sub>1</sub> | <input type="checkbox"/> <sub>2</sub>                                                                                                                                            | <input type="checkbox"/> <sub>3</sub> | <input type="checkbox"/> <sub>0</sub> |
| 肌酸激酶同工酶 (CK-MB)                                                                                                                                                                                                                                                        |      | <input type="checkbox"/> <sub>1</sub> U/L <input type="checkbox"/> <sub>2</sub> 其他: _____    | <input type="checkbox"/> <sub>1</sub> | <input type="checkbox"/> <sub>2</sub>                                                                                                                                            | <input type="checkbox"/> <sub>3</sub> | <input type="checkbox"/> <sub>0</sub> |
| 血尿素氮 (BUN)                                                                                                                                                                                                                                                             |      | <input type="checkbox"/> <sub>1</sub> mmol/L <input type="checkbox"/> <sub>2</sub> 其他: _____ | <input type="checkbox"/> <sub>1</sub> | <input type="checkbox"/> <sub>2</sub>                                                                                                                                            | <input type="checkbox"/> <sub>3</sub> | <input type="checkbox"/> <sub>0</sub> |
| 尿素 (Urea)                                                                                                                                                                                                                                                              |      | <input type="checkbox"/> <sub>1</sub> mmol/L <input type="checkbox"/> <sub>2</sub> 其他: _____ | <input type="checkbox"/> <sub>1</sub> | <input type="checkbox"/> <sub>2</sub>                                                                                                                                            | <input type="checkbox"/> <sub>3</sub> | <input type="checkbox"/> <sub>0</sub> |
| 血肌酐 (CR)                                                                                                                                                                                                                                                               |      | <input type="checkbox"/> <sub>1</sub> μmol/L <input type="checkbox"/> <sub>2</sub> 其他: _____ | <input type="checkbox"/> <sub>1</sub> | <input type="checkbox"/> <sub>2</sub>                                                                                                                                            | <input type="checkbox"/> <sub>3</sub> | <input type="checkbox"/> <sub>0</sub> |

|                                                  |                 |
|--------------------------------------------------|-----------------|
| 研究方案编号: KY2020-29                                | <b>附表-计划外检查</b> |
| 研究中心编号 <input style="width: 50px;" type="text"/> |                 |

受试者筛选号

| 尿常规 <input type="checkbox"/> 未查, 原因 _____                                                                                                                                                                                                                                                                                                                                                             |      |                                                                                              |                                       |                                                                                                                                                                                  |                                       |                                       |
|-------------------------------------------------------------------------------------------------------------------------------------------------------------------------------------------------------------------------------------------------------------------------------------------------------------------------------------------------------------------------------------------------------|------|----------------------------------------------------------------------------------------------|---------------------------------------|----------------------------------------------------------------------------------------------------------------------------------------------------------------------------------|---------------------------------------|---------------------------------------|
| 采样日期: <input style="width: 20px;" type="text"/> <input style="width: 20px;" type="text"/> <input style="width: 20px;" type="text"/> 年 <input style="width: 20px;" type="text"/> <input style="width: 20px;" type="text"/> <input style="width: 20px;" type="text"/> 月 <input style="width: 20px;" type="text"/> <input style="width: 20px;" type="text"/> <input style="width: 20px;" type="text"/> 日 |      |                                                                                              |                                       | 正常值范围编号: <input style="width: 20px;" type="text"/> <input style="width: 20px;" type="text"/> <input style="width: 20px;" type="text"/> <input style="width: 20px;" type="text"/> |                                       |                                       |
| 检查项目                                                                                                                                                                                                                                                                                                                                                                                                  | 测量结果 |                                                                                              | 结果判定                                  |                                                                                                                                                                                  |                                       | 未查                                    |
|                                                                                                                                                                                                                                                                                                                                                                                                       | 实测值  | 单位                                                                                           | 正常                                    | 异常                                                                                                                                                                               |                                       |                                       |
|                                                                                                                                                                                                                                                                                                                                                                                                       |      |                                                                                              |                                       | 无临床意义                                                                                                                                                                            | 有临床意义                                 |                                       |
| 尿蛋白                                                                                                                                                                                                                                                                                                                                                                                                   |      | <input type="checkbox"/> <sub>1</sub> 不适用 <input type="checkbox"/> <sub>2</sub> 其他: _____    | <input type="checkbox"/> <sub>1</sub> | <input type="checkbox"/> <sub>2</sub>                                                                                                                                            | <input type="checkbox"/> <sub>3</sub> | <input type="checkbox"/> <sub>0</sub> |
| 尿葡萄糖                                                                                                                                                                                                                                                                                                                                                                                                  |      | <input type="checkbox"/> <sub>1</sub> mmol/L <input type="checkbox"/> <sub>2</sub> 其他: _____ | <input type="checkbox"/> <sub>1</sub> | <input type="checkbox"/> <sub>2</sub>                                                                                                                                            | <input type="checkbox"/> <sub>3</sub> | <input type="checkbox"/> <sub>0</sub> |
| 尿 PH 值                                                                                                                                                                                                                                                                                                                                                                                                |      | <input type="checkbox"/> <sub>1</sub> 不适用 <input type="checkbox"/> <sub>2</sub> 其他: _____    | <input type="checkbox"/> <sub>1</sub> | <input type="checkbox"/> <sub>2</sub>                                                                                                                                            | <input type="checkbox"/> <sub>3</sub> | <input type="checkbox"/> <sub>0</sub> |
| 尿红细胞                                                                                                                                                                                                                                                                                                                                                                                                  |      | <input type="checkbox"/> <sub>1</sub> 不适用 <input type="checkbox"/> <sub>2</sub> 其他: _____    | <input type="checkbox"/> <sub>1</sub> | <input type="checkbox"/> <sub>2</sub>                                                                                                                                            | <input type="checkbox"/> <sub>3</sub> | <input type="checkbox"/> <sub>0</sub> |
| 尿白细胞                                                                                                                                                                                                                                                                                                                                                                                                  |      | <input type="checkbox"/> <sub>1</sub> 不适用 <input type="checkbox"/> <sub>2</sub> 其他: _____    | <input type="checkbox"/> <sub>1</sub> | <input type="checkbox"/> <sub>2</sub>                                                                                                                                            | <input type="checkbox"/> <sub>3</sub> | <input type="checkbox"/> <sub>0</sub> |
| 尿酮体                                                                                                                                                                                                                                                                                                                                                                                                   |      | <input type="checkbox"/> <sub>1</sub> 不适用 <input type="checkbox"/> <sub>2</sub> 其他: _____    | <input type="checkbox"/> <sub>1</sub> | <input type="checkbox"/> <sub>2</sub>                                                                                                                                            | <input type="checkbox"/> <sub>3</sub> | <input type="checkbox"/> <sub>0</sub> |

| 尿常规 <input type="checkbox"/> 未查, 原因 _____                                                                                                                                                                                                                                                                                                                                                             |      |                                                                                              |                                       |                                                                                                                                                                                  |                                       |                                       |
|-------------------------------------------------------------------------------------------------------------------------------------------------------------------------------------------------------------------------------------------------------------------------------------------------------------------------------------------------------------------------------------------------------|------|----------------------------------------------------------------------------------------------|---------------------------------------|----------------------------------------------------------------------------------------------------------------------------------------------------------------------------------|---------------------------------------|---------------------------------------|
| 采样日期: <input style="width: 20px;" type="text"/> <input style="width: 20px;" type="text"/> <input style="width: 20px;" type="text"/> 年 <input style="width: 20px;" type="text"/> <input style="width: 20px;" type="text"/> <input style="width: 20px;" type="text"/> 月 <input style="width: 20px;" type="text"/> <input style="width: 20px;" type="text"/> <input style="width: 20px;" type="text"/> 日 |      |                                                                                              |                                       | 正常值范围编号: <input style="width: 20px;" type="text"/> <input style="width: 20px;" type="text"/> <input style="width: 20px;" type="text"/> <input style="width: 20px;" type="text"/> |                                       |                                       |
| 检查项目                                                                                                                                                                                                                                                                                                                                                                                                  | 测量结果 |                                                                                              | 结果判定                                  |                                                                                                                                                                                  |                                       | 未查                                    |
|                                                                                                                                                                                                                                                                                                                                                                                                       | 实测值  | 单位                                                                                           | 正常                                    | 异常                                                                                                                                                                               |                                       |                                       |
|                                                                                                                                                                                                                                                                                                                                                                                                       |      |                                                                                              |                                       | 无临床意义                                                                                                                                                                            | 有临床意义                                 |                                       |
| 尿蛋白                                                                                                                                                                                                                                                                                                                                                                                                   |      | <input type="checkbox"/> <sub>1</sub> 不适用 <input type="checkbox"/> <sub>2</sub> 其他: _____    | <input type="checkbox"/> <sub>1</sub> | <input type="checkbox"/> <sub>2</sub>                                                                                                                                            | <input type="checkbox"/> <sub>3</sub> | <input type="checkbox"/> <sub>0</sub> |
| 尿葡萄糖                                                                                                                                                                                                                                                                                                                                                                                                  |      | <input type="checkbox"/> <sub>1</sub> mmol/L <input type="checkbox"/> <sub>2</sub> 其他: _____ | <input type="checkbox"/> <sub>1</sub> | <input type="checkbox"/> <sub>2</sub>                                                                                                                                            | <input type="checkbox"/> <sub>3</sub> | <input type="checkbox"/> <sub>0</sub> |
| 尿 PH 值                                                                                                                                                                                                                                                                                                                                                                                                |      | <input type="checkbox"/> <sub>1</sub> 不适用 <input type="checkbox"/> <sub>2</sub> 其他: _____    | <input type="checkbox"/> <sub>1</sub> | <input type="checkbox"/> <sub>2</sub>                                                                                                                                            | <input type="checkbox"/> <sub>3</sub> | <input type="checkbox"/> <sub>0</sub> |
| 尿红细胞                                                                                                                                                                                                                                                                                                                                                                                                  |      | <input type="checkbox"/> <sub>1</sub> 不适用 <input type="checkbox"/> <sub>2</sub> 其他: _____    | <input type="checkbox"/> <sub>1</sub> | <input type="checkbox"/> <sub>2</sub>                                                                                                                                            | <input type="checkbox"/> <sub>3</sub> | <input type="checkbox"/> <sub>0</sub> |
| 尿白细胞                                                                                                                                                                                                                                                                                                                                                                                                  |      | <input type="checkbox"/> <sub>1</sub> 不适用 <input type="checkbox"/> <sub>2</sub> 其他: _____    | <input type="checkbox"/> <sub>1</sub> | <input type="checkbox"/> <sub>2</sub>                                                                                                                                            | <input type="checkbox"/> <sub>3</sub> | <input type="checkbox"/> <sub>0</sub> |
| 尿酮体                                                                                                                                                                                                                                                                                                                                                                                                   |      | <input type="checkbox"/> <sub>1</sub> 不适用 <input type="checkbox"/> <sub>2</sub> 其他: _____    | <input type="checkbox"/> <sub>1</sub> | <input type="checkbox"/> <sub>2</sub>                                                                                                                                            | <input type="checkbox"/> <sub>3</sub> | <input type="checkbox"/> <sub>0</sub> |

| 尿常规 <input type="checkbox"/> 未查, 原因 _____                                                                                                                                                                                                                                                                                                                                                             |      |                                                                                              |                                       |                                                                                                                                                                                  |                                       |                                       |
|-------------------------------------------------------------------------------------------------------------------------------------------------------------------------------------------------------------------------------------------------------------------------------------------------------------------------------------------------------------------------------------------------------|------|----------------------------------------------------------------------------------------------|---------------------------------------|----------------------------------------------------------------------------------------------------------------------------------------------------------------------------------|---------------------------------------|---------------------------------------|
| 采样日期: <input style="width: 20px;" type="text"/> <input style="width: 20px;" type="text"/> <input style="width: 20px;" type="text"/> 年 <input style="width: 20px;" type="text"/> <input style="width: 20px;" type="text"/> <input style="width: 20px;" type="text"/> 月 <input style="width: 20px;" type="text"/> <input style="width: 20px;" type="text"/> <input style="width: 20px;" type="text"/> 日 |      |                                                                                              |                                       | 正常值范围编号: <input style="width: 20px;" type="text"/> <input style="width: 20px;" type="text"/> <input style="width: 20px;" type="text"/> <input style="width: 20px;" type="text"/> |                                       |                                       |
| 检查项目                                                                                                                                                                                                                                                                                                                                                                                                  | 测量结果 |                                                                                              | 结果判定                                  |                                                                                                                                                                                  |                                       | 未查                                    |
|                                                                                                                                                                                                                                                                                                                                                                                                       | 实测值  | 单位                                                                                           | 正常                                    | 异常                                                                                                                                                                               |                                       |                                       |
|                                                                                                                                                                                                                                                                                                                                                                                                       |      |                                                                                              |                                       | 无临床意义                                                                                                                                                                            | 有临床意义                                 |                                       |
| 尿蛋白                                                                                                                                                                                                                                                                                                                                                                                                   |      | <input type="checkbox"/> <sub>1</sub> 不适用 <input type="checkbox"/> <sub>2</sub> 其他: _____    | <input type="checkbox"/> <sub>1</sub> | <input type="checkbox"/> <sub>2</sub>                                                                                                                                            | <input type="checkbox"/> <sub>3</sub> | <input type="checkbox"/> <sub>0</sub> |
| 尿葡萄糖                                                                                                                                                                                                                                                                                                                                                                                                  |      | <input type="checkbox"/> <sub>1</sub> mmol/L <input type="checkbox"/> <sub>2</sub> 其他: _____ | <input type="checkbox"/> <sub>1</sub> | <input type="checkbox"/> <sub>2</sub>                                                                                                                                            | <input type="checkbox"/> <sub>3</sub> | <input type="checkbox"/> <sub>0</sub> |
| 尿 PH 值                                                                                                                                                                                                                                                                                                                                                                                                |      | <input type="checkbox"/> <sub>1</sub> 不适用 <input type="checkbox"/> <sub>2</sub> 其他: _____    | <input type="checkbox"/> <sub>1</sub> | <input type="checkbox"/> <sub>2</sub>                                                                                                                                            | <input type="checkbox"/> <sub>3</sub> | <input type="checkbox"/> <sub>0</sub> |
| 尿红细胞                                                                                                                                                                                                                                                                                                                                                                                                  |      | <input type="checkbox"/> <sub>1</sub> 不适用 <input type="checkbox"/> <sub>2</sub> 其他: _____    | <input type="checkbox"/> <sub>1</sub> | <input type="checkbox"/> <sub>2</sub>                                                                                                                                            | <input type="checkbox"/> <sub>3</sub> | <input type="checkbox"/> <sub>0</sub> |
| 尿白细胞                                                                                                                                                                                                                                                                                                                                                                                                  |      | <input type="checkbox"/> <sub>1</sub> 不适用 <input type="checkbox"/> <sub>2</sub> 其他: _____    | <input type="checkbox"/> <sub>1</sub> | <input type="checkbox"/> <sub>2</sub>                                                                                                                                            | <input type="checkbox"/> <sub>3</sub> | <input type="checkbox"/> <sub>0</sub> |
| 尿酮体                                                                                                                                                                                                                                                                                                                                                                                                   |      | <input type="checkbox"/> <sub>1</sub> 不适用 <input type="checkbox"/> <sub>2</sub> 其他: _____    | <input type="checkbox"/> <sub>1</sub> | <input type="checkbox"/> <sub>2</sub>                                                                                                                                            | <input type="checkbox"/> <sub>3</sub> | <input type="checkbox"/> <sub>0</sub> |

|                                                                                            |                 |
|--------------------------------------------------------------------------------------------|-----------------|
| 研究方案编号: KY2020-29                                                                          | <b>附表-计划外检查</b> |
| 研究中心编号 <input style="width: 50px;" type="text"/> <input style="width: 50px;" type="text"/> |                 |

| <b>凝血功能</b> <input type="checkbox"/> <sub>0</sub> 未查, 原因 _____                                                                                                                                                                    |                                                                                           |    |                                       |                                                                                                                                        |                                       |                                       |
|-----------------------------------------------------------------------------------------------------------------------------------------------------------------------------------------------------------------------------------|-------------------------------------------------------------------------------------------|----|---------------------------------------|----------------------------------------------------------------------------------------------------------------------------------------|---------------------------------------|---------------------------------------|
| 采样日期: <input style="width: 20px;" type="text"/> / <input style="width: 20px;" type="text"/> / <input style="width: 20px;" type="text"/> 年 <input style="width: 20px;" type="text"/> 月 <input style="width: 20px;" type="text"/> 日 |                                                                                           |    |                                       | 正常值范围编号: <input style="width: 20px;" type="text"/> <input style="width: 20px;" type="text"/> <input style="width: 20px;" type="text"/> |                                       |                                       |
| 检查项目                                                                                                                                                                                                                              | 测量结果                                                                                      |    | 结果判定                                  |                                                                                                                                        |                                       | 未查                                    |
|                                                                                                                                                                                                                                   | 实测值                                                                                       | 单位 | 正常                                    | 异常                                                                                                                                     |                                       |                                       |
|                                                                                                                                                                                                                                   |                                                                                           |    |                                       | 无临床意义                                                                                                                                  | 有临床意义                                 |                                       |
| 凝血酶原时间 (PT)                                                                                                                                                                                                                       | <input type="checkbox"/> <sub>1</sub> S <input type="checkbox"/> <sub>2</sub> 其他: _____   |    | <input type="checkbox"/> <sub>1</sub> | <input type="checkbox"/> <sub>2</sub>                                                                                                  | <input type="checkbox"/> <sub>3</sub> | <input type="checkbox"/> <sub>0</sub> |
| 活化部分凝血活酶时间 (APTT)                                                                                                                                                                                                                 | <input type="checkbox"/> <sub>1</sub> S <input type="checkbox"/> <sub>2</sub> 其他: _____   |    | <input type="checkbox"/> <sub>1</sub> | <input type="checkbox"/> <sub>2</sub>                                                                                                  | <input type="checkbox"/> <sub>3</sub> | <input type="checkbox"/> <sub>0</sub> |
| 凝血酶时间 (TT)                                                                                                                                                                                                                        | <input type="checkbox"/> <sub>1</sub> S <input type="checkbox"/> <sub>2</sub> 其他: _____   |    | <input type="checkbox"/> <sub>1</sub> | <input type="checkbox"/> <sub>2</sub>                                                                                                  | <input type="checkbox"/> <sub>3</sub> | <input type="checkbox"/> <sub>0</sub> |
| 血浆纤维蛋白原 (Fbg)                                                                                                                                                                                                                     | <input type="checkbox"/> <sub>1</sub> g/L <input type="checkbox"/> <sub>2</sub> 其他: _____ |    | <input type="checkbox"/> <sub>1</sub> | <input type="checkbox"/> <sub>2</sub>                                                                                                  | <input type="checkbox"/> <sub>3</sub> | <input type="checkbox"/> <sub>0</sub> |
| 国际标准化比率 (INR)                                                                                                                                                                                                                     | <input type="checkbox"/> <sub>1</sub> 不适用 <input type="checkbox"/> <sub>2</sub> 其他: _____ |    | <input type="checkbox"/> <sub>1</sub> | <input type="checkbox"/> <sub>2</sub>                                                                                                  | <input type="checkbox"/> <sub>3</sub> | <input type="checkbox"/> <sub>0</sub> |

| <b>凝血功能</b> <input type="checkbox"/> <sub>0</sub> 未查, 原因 _____                                                                                                                                                                    |                                                                                           |    |                                       |                                                                                                                                        |                                       |                                       |
|-----------------------------------------------------------------------------------------------------------------------------------------------------------------------------------------------------------------------------------|-------------------------------------------------------------------------------------------|----|---------------------------------------|----------------------------------------------------------------------------------------------------------------------------------------|---------------------------------------|---------------------------------------|
| 采样日期: <input style="width: 20px;" type="text"/> / <input style="width: 20px;" type="text"/> / <input style="width: 20px;" type="text"/> 年 <input style="width: 20px;" type="text"/> 月 <input style="width: 20px;" type="text"/> 日 |                                                                                           |    |                                       | 正常值范围编号: <input style="width: 20px;" type="text"/> <input style="width: 20px;" type="text"/> <input style="width: 20px;" type="text"/> |                                       |                                       |
| 检查项目                                                                                                                                                                                                                              | 测量结果                                                                                      |    | 结果判定                                  |                                                                                                                                        |                                       | 未查                                    |
|                                                                                                                                                                                                                                   | 实测值                                                                                       | 单位 | 正常                                    | 异常                                                                                                                                     |                                       |                                       |
|                                                                                                                                                                                                                                   |                                                                                           |    |                                       | 无临床意义                                                                                                                                  | 有临床意义                                 |                                       |
| 凝血酶原时间 (PT)                                                                                                                                                                                                                       | <input type="checkbox"/> <sub>1</sub> S <input type="checkbox"/> <sub>2</sub> 其他: _____   |    | <input type="checkbox"/> <sub>1</sub> | <input type="checkbox"/> <sub>2</sub>                                                                                                  | <input type="checkbox"/> <sub>3</sub> | <input type="checkbox"/> <sub>0</sub> |
| 活化部分凝血活酶时间 (APTT)                                                                                                                                                                                                                 | <input type="checkbox"/> <sub>1</sub> S <input type="checkbox"/> <sub>2</sub> 其他: _____   |    | <input type="checkbox"/> <sub>1</sub> | <input type="checkbox"/> <sub>2</sub>                                                                                                  | <input type="checkbox"/> <sub>3</sub> | <input type="checkbox"/> <sub>0</sub> |
| 凝血酶时间 (TT)                                                                                                                                                                                                                        | <input type="checkbox"/> <sub>1</sub> S <input type="checkbox"/> <sub>2</sub> 其他: _____   |    | <input type="checkbox"/> <sub>1</sub> | <input type="checkbox"/> <sub>2</sub>                                                                                                  | <input type="checkbox"/> <sub>3</sub> | <input type="checkbox"/> <sub>0</sub> |
| 血浆纤维蛋白原 (Fbg)                                                                                                                                                                                                                     | <input type="checkbox"/> <sub>1</sub> g/L <input type="checkbox"/> <sub>2</sub> 其他: _____ |    | <input type="checkbox"/> <sub>1</sub> | <input type="checkbox"/> <sub>2</sub>                                                                                                  | <input type="checkbox"/> <sub>3</sub> | <input type="checkbox"/> <sub>0</sub> |
| 国际标准化比率 (INR)                                                                                                                                                                                                                     | <input type="checkbox"/> <sub>1</sub> 不适用 <input type="checkbox"/> <sub>2</sub> 其他: _____ |    | <input type="checkbox"/> <sub>1</sub> | <input type="checkbox"/> <sub>2</sub>                                                                                                  | <input type="checkbox"/> <sub>3</sub> | <input type="checkbox"/> <sub>0</sub> |

| <b>凝血功能</b> <input type="checkbox"/> <sub>0</sub> 未查, 原因 _____                                                                                                                                                                    |                                                                                           |    |                                       |                                                                                                                                        |                                       |                                       |
|-----------------------------------------------------------------------------------------------------------------------------------------------------------------------------------------------------------------------------------|-------------------------------------------------------------------------------------------|----|---------------------------------------|----------------------------------------------------------------------------------------------------------------------------------------|---------------------------------------|---------------------------------------|
| 采样日期: <input style="width: 20px;" type="text"/> / <input style="width: 20px;" type="text"/> / <input style="width: 20px;" type="text"/> 年 <input style="width: 20px;" type="text"/> 月 <input style="width: 20px;" type="text"/> 日 |                                                                                           |    |                                       | 正常值范围编号: <input style="width: 20px;" type="text"/> <input style="width: 20px;" type="text"/> <input style="width: 20px;" type="text"/> |                                       |                                       |
| 检查项目                                                                                                                                                                                                                              | 测量结果                                                                                      |    | 结果判定                                  |                                                                                                                                        |                                       | 未查                                    |
|                                                                                                                                                                                                                                   | 实测值                                                                                       | 单位 | 正常                                    | 异常                                                                                                                                     |                                       |                                       |
|                                                                                                                                                                                                                                   |                                                                                           |    |                                       | 无临床意义                                                                                                                                  | 有临床意义                                 |                                       |
| 凝血酶原时间 (PT)                                                                                                                                                                                                                       | <input type="checkbox"/> <sub>1</sub> S <input type="checkbox"/> <sub>2</sub> 其他: _____   |    | <input type="checkbox"/> <sub>1</sub> | <input type="checkbox"/> <sub>2</sub>                                                                                                  | <input type="checkbox"/> <sub>3</sub> | <input type="checkbox"/> <sub>0</sub> |
| 活化部分凝血活酶时间 (APTT)                                                                                                                                                                                                                 | <input type="checkbox"/> <sub>1</sub> S <input type="checkbox"/> <sub>2</sub> 其他: _____   |    | <input type="checkbox"/> <sub>1</sub> | <input type="checkbox"/> <sub>2</sub>                                                                                                  | <input type="checkbox"/> <sub>3</sub> | <input type="checkbox"/> <sub>0</sub> |
| 凝血酶时间 (TT)                                                                                                                                                                                                                        | <input type="checkbox"/> <sub>1</sub> S <input type="checkbox"/> <sub>2</sub> 其他: _____   |    | <input type="checkbox"/> <sub>1</sub> | <input type="checkbox"/> <sub>2</sub>                                                                                                  | <input type="checkbox"/> <sub>3</sub> | <input type="checkbox"/> <sub>0</sub> |
| 血浆纤维蛋白原 (Fbg)                                                                                                                                                                                                                     | <input type="checkbox"/> <sub>1</sub> g/L <input type="checkbox"/> <sub>2</sub> 其他: _____ |    | <input type="checkbox"/> <sub>1</sub> | <input type="checkbox"/> <sub>2</sub>                                                                                                  | <input type="checkbox"/> <sub>3</sub> | <input type="checkbox"/> <sub>0</sub> |
| 国际标准化比率 (INR)                                                                                                                                                                                                                     | <input type="checkbox"/> <sub>1</sub> 不适用 <input type="checkbox"/> <sub>2</sub> 其他: _____ |    | <input type="checkbox"/> <sub>1</sub> | <input type="checkbox"/> <sub>2</sub>                                                                                                  | <input type="checkbox"/> <sub>3</sub> | <input type="checkbox"/> <sub>0</sub> |

|                             |          |
|-----------------------------|----------|
| 研究方案编号: KY2020-29           | 附表-计划外检查 |
| 研究中心编号 <input type="text"/> |          |

| <b>C 反应蛋白 (CRP)</b> <input type="checkbox"/> <sub>0</sub> 未查, 原因 <input type="text"/> |      |                                                                                                           |                               |                                       |                                       |
|---------------------------------------------------------------------------------------|------|-----------------------------------------------------------------------------------------------------------|-------------------------------|---------------------------------------|---------------------------------------|
| 采样日期: <input type="text"/> 年 <input type="text"/> 月 <input type="text"/> 日            |      |                                                                                                           | 正常值范围编号: <input type="text"/> |                                       |                                       |
| 检查项目                                                                                  | 测量结果 |                                                                                                           | 结果判定                          |                                       |                                       |
| C 反应蛋白 (CRP)                                                                          | 实测值  | 单位                                                                                                        | 正常                            | 异常                                    |                                       |
|                                                                                       |      | <input type="checkbox"/> <sub>1</sub> mg/L <input type="checkbox"/> <sub>2</sub> 其他: <input type="text"/> |                               | <input type="checkbox"/> <sub>1</sub> | 无临床意义                                 |
|                                                                                       |      |                                                                                                           |                               | <input type="checkbox"/> <sub>2</sub> | <input type="checkbox"/> <sub>3</sub> |

| <b>C 反应蛋白 (CRP)</b> <input type="checkbox"/> <sub>0</sub> 未查, 原因 <input type="text"/> |      |                                                                                                           |                               |                                       |                                       |
|---------------------------------------------------------------------------------------|------|-----------------------------------------------------------------------------------------------------------|-------------------------------|---------------------------------------|---------------------------------------|
| 采样日期: <input type="text"/> 年 <input type="text"/> 月 <input type="text"/> 日            |      |                                                                                                           | 正常值范围编号: <input type="text"/> |                                       |                                       |
| 检查项目                                                                                  | 测量结果 |                                                                                                           | 结果判定                          |                                       |                                       |
| C 反应蛋白 (CRP)                                                                          | 实测值  | 单位                                                                                                        | 正常                            | 异常                                    |                                       |
|                                                                                       |      | <input type="checkbox"/> <sub>1</sub> mg/L <input type="checkbox"/> <sub>2</sub> 其他: <input type="text"/> |                               | <input type="checkbox"/> <sub>1</sub> | 无临床意义                                 |
|                                                                                       |      |                                                                                                           |                               | <input type="checkbox"/> <sub>2</sub> | <input type="checkbox"/> <sub>3</sub> |

| <b>C 反应蛋白 (CRP)</b> <input type="checkbox"/> <sub>0</sub> 未查, 原因 <input type="text"/> |      |                                                                                                           |                               |                                       |                                       |
|---------------------------------------------------------------------------------------|------|-----------------------------------------------------------------------------------------------------------|-------------------------------|---------------------------------------|---------------------------------------|
| 采样日期: <input type="text"/> 年 <input type="text"/> 月 <input type="text"/> 日            |      |                                                                                                           | 正常值范围编号: <input type="text"/> |                                       |                                       |
| 检查项目                                                                                  | 测量结果 |                                                                                                           | 结果判定                          |                                       |                                       |
| C 反应蛋白 (CRP)                                                                          | 实测值  | 单位                                                                                                        | 正常                            | 异常                                    |                                       |
|                                                                                       |      | <input type="checkbox"/> <sub>1</sub> mg/L <input type="checkbox"/> <sub>2</sub> 其他: <input type="text"/> |                               | <input type="checkbox"/> <sub>1</sub> | 无临床意义                                 |
|                                                                                       |      |                                                                                                           |                               | <input type="checkbox"/> <sub>2</sub> | <input type="checkbox"/> <sub>3</sub> |

| <b>C 反应蛋白 (CRP)</b> <input type="checkbox"/> <sub>0</sub> 未查, 原因 <input type="text"/> |      |                                                                                                           |                               |                                       |                                       |
|---------------------------------------------------------------------------------------|------|-----------------------------------------------------------------------------------------------------------|-------------------------------|---------------------------------------|---------------------------------------|
| 采样日期: <input type="text"/> 年 <input type="text"/> 月 <input type="text"/> 日            |      |                                                                                                           | 正常值范围编号: <input type="text"/> |                                       |                                       |
| 检查项目                                                                                  | 测量结果 |                                                                                                           | 结果判定                          |                                       |                                       |
| C 反应蛋白 (CRP)                                                                          | 实测值  | 单位                                                                                                        | 正常                            | 异常                                    |                                       |
|                                                                                       |      | <input type="checkbox"/> <sub>1</sub> mg/L <input type="checkbox"/> <sub>2</sub> 其他: <input type="text"/> |                               | <input type="checkbox"/> <sub>1</sub> | 无临床意义                                 |
|                                                                                       |      |                                                                                                           |                               | <input type="checkbox"/> <sub>2</sub> | <input type="checkbox"/> <sub>3</sub> |

| <b>C 反应蛋白 (CRP)</b> <input type="checkbox"/> <sub>0</sub> 未查, 原因 <input type="text"/> |      |                                                                                                           |                               |                                       |                                       |
|---------------------------------------------------------------------------------------|------|-----------------------------------------------------------------------------------------------------------|-------------------------------|---------------------------------------|---------------------------------------|
| 采样日期: <input type="text"/> 年 <input type="text"/> 月 <input type="text"/> 日            |      |                                                                                                           | 正常值范围编号: <input type="text"/> |                                       |                                       |
| 检查项目                                                                                  | 测量结果 |                                                                                                           | 结果判定                          |                                       |                                       |
| C 反应蛋白 (CRP)                                                                          | 实测值  | 单位                                                                                                        | 正常                            | 异常                                    |                                       |
|                                                                                       |      | <input type="checkbox"/> <sub>1</sub> mg/L <input type="checkbox"/> <sub>2</sub> 其他: <input type="text"/> |                               | <input type="checkbox"/> <sub>1</sub> | 无临床意义                                 |
|                                                                                       |      |                                                                                                           |                               | <input type="checkbox"/> <sub>2</sub> | <input type="checkbox"/> <sub>3</sub> |



|                             |          |
|-----------------------------|----------|
| 研究方案编号: KY2020-29           | 附表-计划外检查 |
| 研究中心编号 <input type="text"/> |          |

| 血沉 (ESR) <input type="checkbox"/> 未查, 原因 <input type="text"/>              |      |                                                                                              |                               |                                       |                                       |
|----------------------------------------------------------------------------|------|----------------------------------------------------------------------------------------------|-------------------------------|---------------------------------------|---------------------------------------|
| 采样日期: <input type="text"/> 年 <input type="text"/> 月 <input type="text"/> 日 |      |                                                                                              | 正常值范围编号: <input type="text"/> |                                       |                                       |
| 检查项目                                                                       | 测量结果 |                                                                                              | 结果判定                          |                                       |                                       |
| 血沉 (ESR)                                                                   | 实测值  | 单位                                                                                           | 正常                            | 异常                                    |                                       |
|                                                                            |      | <input type="checkbox"/> <sub>1</sub> mm/h <input type="checkbox"/> 其他: <input type="text"/> |                               | <input type="checkbox"/> <sub>1</sub> | 无临床意义                                 |
|                                                                            |      |                                                                                              |                               | <input type="checkbox"/> <sub>2</sub> | <input type="checkbox"/> <sub>3</sub> |

| 血沉 (ESR) <input type="checkbox"/> 未查, 原因 <input type="text"/>              |      |                                                                                              |                               |                                       |                                       |
|----------------------------------------------------------------------------|------|----------------------------------------------------------------------------------------------|-------------------------------|---------------------------------------|---------------------------------------|
| 采样日期: <input type="text"/> 年 <input type="text"/> 月 <input type="text"/> 日 |      |                                                                                              | 正常值范围编号: <input type="text"/> |                                       |                                       |
| 检查项目                                                                       | 测量结果 |                                                                                              | 结果判定                          |                                       |                                       |
| 血沉 (ESR)                                                                   | 实测值  | 单位                                                                                           | 正常                            | 异常                                    |                                       |
|                                                                            |      | <input type="checkbox"/> <sub>1</sub> mm/h <input type="checkbox"/> 其他: <input type="text"/> |                               | <input type="checkbox"/> <sub>1</sub> | 无临床意义                                 |
|                                                                            |      |                                                                                              |                               | <input type="checkbox"/> <sub>2</sub> | <input type="checkbox"/> <sub>3</sub> |

| 血沉 (ESR) <input type="checkbox"/> 未查, 原因 <input type="text"/>              |      |                                                                                              |                               |                                       |                                       |
|----------------------------------------------------------------------------|------|----------------------------------------------------------------------------------------------|-------------------------------|---------------------------------------|---------------------------------------|
| 采样日期: <input type="text"/> 年 <input type="text"/> 月 <input type="text"/> 日 |      |                                                                                              | 正常值范围编号: <input type="text"/> |                                       |                                       |
| 检查项目                                                                       | 测量结果 |                                                                                              | 结果判定                          |                                       |                                       |
| 血沉 (ESR)                                                                   | 实测值  | 单位                                                                                           | 正常                            | 异常                                    |                                       |
|                                                                            |      | <input type="checkbox"/> <sub>1</sub> mm/h <input type="checkbox"/> 其他: <input type="text"/> |                               | <input type="checkbox"/> <sub>1</sub> | 无临床意义                                 |
|                                                                            |      |                                                                                              |                               | <input type="checkbox"/> <sub>2</sub> | <input type="checkbox"/> <sub>3</sub> |

| 血沉 (ESR) <input type="checkbox"/> 未查, 原因 <input type="text"/>              |      |                                                                                              |                               |                                       |                                       |
|----------------------------------------------------------------------------|------|----------------------------------------------------------------------------------------------|-------------------------------|---------------------------------------|---------------------------------------|
| 采样日期: <input type="text"/> 年 <input type="text"/> 月 <input type="text"/> 日 |      |                                                                                              | 正常值范围编号: <input type="text"/> |                                       |                                       |
| 检查项目                                                                       | 测量结果 |                                                                                              | 结果判定                          |                                       |                                       |
| 血沉 (ESR)                                                                   | 实测值  | 单位                                                                                           | 正常                            | 异常                                    |                                       |
|                                                                            |      | <input type="checkbox"/> <sub>1</sub> mm/h <input type="checkbox"/> 其他: <input type="text"/> |                               | <input type="checkbox"/> <sub>1</sub> | 无临床意义                                 |
|                                                                            |      |                                                                                              |                               | <input type="checkbox"/> <sub>2</sub> | <input type="checkbox"/> <sub>3</sub> |

| 血沉 (ESR) <input type="checkbox"/> 未查, 原因 <input type="text"/>              |      |                                                                                              |                               |                                       |                                       |
|----------------------------------------------------------------------------|------|----------------------------------------------------------------------------------------------|-------------------------------|---------------------------------------|---------------------------------------|
| 采样日期: <input type="text"/> 年 <input type="text"/> 月 <input type="text"/> 日 |      |                                                                                              | 正常值范围编号: <input type="text"/> |                                       |                                       |
| 检查项目                                                                       | 测量结果 |                                                                                              | 结果判定                          |                                       |                                       |
| 血沉 (ESR)                                                                   | 实测值  | 单位                                                                                           | 正常                            | 异常                                    |                                       |
|                                                                            |      | <input type="checkbox"/> <sub>1</sub> mm/h <input type="checkbox"/> 其他: <input type="text"/> |                               | <input type="checkbox"/> <sub>1</sub> | 无临床意义                                 |
|                                                                            |      |                                                                                              |                               | <input type="checkbox"/> <sub>2</sub> | <input type="checkbox"/> <sub>3</sub> |

|                             |          |
|-----------------------------|----------|
| 研究方案编号: KY2020-29           | 附表-计划外检查 |
| 研究中心编号 <input type="text"/> |          |

| TNF- $\alpha$ <input type="checkbox"/> <sub>0</sub> 未查, 原因 <input type="text"/> |      |                                                                                                            |                               |                                       |                                       |
|---------------------------------------------------------------------------------|------|------------------------------------------------------------------------------------------------------------|-------------------------------|---------------------------------------|---------------------------------------|
| 采样日期: <input type="text"/> 年 <input type="text"/> 月 <input type="text"/> 日      |      |                                                                                                            | 正常值范围编号: <input type="text"/> |                                       |                                       |
| 检查项目                                                                            | 测量结果 |                                                                                                            | 结果判定                          |                                       |                                       |
| TNF- $\alpha$                                                                   | 实测值  | 单位                                                                                                         | 正常                            | 异常                                    |                                       |
|                                                                                 |      | <input type="checkbox"/> <sub>1</sub> pg/mL <input type="checkbox"/> <sub>2</sub> 其他: <input type="text"/> |                               | <input type="checkbox"/> <sub>1</sub> | 无临床意义                                 |
|                                                                                 |      |                                                                                                            |                               | <input type="checkbox"/> <sub>2</sub> | <input type="checkbox"/> <sub>3</sub> |

| TNF- $\alpha$ <input type="checkbox"/> <sub>0</sub> 未查, 原因 <input type="text"/> |      |                                                                                                            |                               |                                       |                                       |
|---------------------------------------------------------------------------------|------|------------------------------------------------------------------------------------------------------------|-------------------------------|---------------------------------------|---------------------------------------|
| 采样日期: <input type="text"/> 年 <input type="text"/> 月 <input type="text"/> 日      |      |                                                                                                            | 正常值范围编号: <input type="text"/> |                                       |                                       |
| 检查项目                                                                            | 测量结果 |                                                                                                            | 结果判定                          |                                       |                                       |
| TNF- $\alpha$                                                                   | 实测值  | 单位                                                                                                         | 正常                            | 异常                                    |                                       |
|                                                                                 |      | <input type="checkbox"/> <sub>1</sub> pg/mL <input type="checkbox"/> <sub>2</sub> 其他: <input type="text"/> |                               | <input type="checkbox"/> <sub>1</sub> | 无临床意义                                 |
|                                                                                 |      |                                                                                                            |                               | <input type="checkbox"/> <sub>2</sub> | <input type="checkbox"/> <sub>3</sub> |

| TNF- $\alpha$ <input type="checkbox"/> <sub>0</sub> 未查, 原因 <input type="text"/> |      |                                                                                                            |                               |                                       |                                       |
|---------------------------------------------------------------------------------|------|------------------------------------------------------------------------------------------------------------|-------------------------------|---------------------------------------|---------------------------------------|
| 采样日期: <input type="text"/> 年 <input type="text"/> 月 <input type="text"/> 日      |      |                                                                                                            | 正常值范围编号: <input type="text"/> |                                       |                                       |
| 检查项目                                                                            | 测量结果 |                                                                                                            | 结果判定                          |                                       |                                       |
| TNF- $\alpha$                                                                   | 实测值  | 单位                                                                                                         | 正常                            | 异常                                    |                                       |
|                                                                                 |      | <input type="checkbox"/> <sub>1</sub> pg/mL <input type="checkbox"/> <sub>2</sub> 其他: <input type="text"/> |                               | <input type="checkbox"/> <sub>1</sub> | 无临床意义                                 |
|                                                                                 |      |                                                                                                            |                               | <input type="checkbox"/> <sub>2</sub> | <input type="checkbox"/> <sub>3</sub> |

| TNF- $\alpha$ <input type="checkbox"/> <sub>0</sub> 未查, 原因 <input type="text"/> |      |                                                                                                            |                               |                                       |                                       |
|---------------------------------------------------------------------------------|------|------------------------------------------------------------------------------------------------------------|-------------------------------|---------------------------------------|---------------------------------------|
| 采样日期: <input type="text"/> 年 <input type="text"/> 月 <input type="text"/> 日      |      |                                                                                                            | 正常值范围编号: <input type="text"/> |                                       |                                       |
| 检查项目                                                                            | 测量结果 |                                                                                                            | 结果判定                          |                                       |                                       |
| TNF- $\alpha$                                                                   | 实测值  | 单位                                                                                                         | 正常                            | 异常                                    |                                       |
|                                                                                 |      | <input type="checkbox"/> <sub>1</sub> pg/mL <input type="checkbox"/> <sub>2</sub> 其他: <input type="text"/> |                               | <input type="checkbox"/> <sub>1</sub> | 无临床意义                                 |
|                                                                                 |      |                                                                                                            |                               | <input type="checkbox"/> <sub>2</sub> | <input type="checkbox"/> <sub>3</sub> |

| TNF- $\alpha$ <input type="checkbox"/> <sub>0</sub> 未查, 原因 <input type="text"/> |      |                                                                                                            |                               |                                       |                                       |
|---------------------------------------------------------------------------------|------|------------------------------------------------------------------------------------------------------------|-------------------------------|---------------------------------------|---------------------------------------|
| 采样日期: <input type="text"/> 年 <input type="text"/> 月 <input type="text"/> 日      |      |                                                                                                            | 正常值范围编号: <input type="text"/> |                                       |                                       |
| 检查项目                                                                            | 测量结果 |                                                                                                            | 结果判定                          |                                       |                                       |
| TNF- $\alpha$                                                                   | 实测值  | 单位                                                                                                         | 正常                            | 异常                                    |                                       |
|                                                                                 |      | <input type="checkbox"/> <sub>1</sub> pg/mL <input type="checkbox"/> <sub>2</sub> 其他: <input type="text"/> |                               | <input type="checkbox"/> <sub>1</sub> | 无临床意义                                 |
|                                                                                 |      |                                                                                                            |                               | <input type="checkbox"/> <sub>2</sub> | <input type="checkbox"/> <sub>3</sub> |

|                             |          |
|-----------------------------|----------|
| 研究方案编号: KY2020-29           | 附表-计划外检查 |
| 研究中心编号 <input type="text"/> |          |

| IL-6 <input type="checkbox"/> 未查, 原因 <input type="text"/>                  |      |                                                                                               |                               |                                       |                                       |
|----------------------------------------------------------------------------|------|-----------------------------------------------------------------------------------------------|-------------------------------|---------------------------------------|---------------------------------------|
| 采样日期: <input type="text"/> 年 <input type="text"/> 月 <input type="text"/> 日 |      |                                                                                               | 正常值范围编号: <input type="text"/> |                                       |                                       |
| 检查项目                                                                       | 测量结果 |                                                                                               | 结果判定                          |                                       |                                       |
| IL-6                                                                       | 实测值  | 单位                                                                                            | 正常                            | 异常                                    |                                       |
|                                                                            |      | <input type="checkbox"/> <sub>1</sub> pg/mL <input type="checkbox"/> 其他: <input type="text"/> |                               | <input type="checkbox"/> <sub>1</sub> | 无临床意义                                 |
|                                                                            |      |                                                                                               |                               | <input type="checkbox"/> <sub>2</sub> | <input type="checkbox"/> <sub>3</sub> |

| IL-6 <input type="checkbox"/> 未查, 原因 <input type="text"/>                  |      |                                                                                               |                               |                                       |                                       |
|----------------------------------------------------------------------------|------|-----------------------------------------------------------------------------------------------|-------------------------------|---------------------------------------|---------------------------------------|
| 采样日期: <input type="text"/> 年 <input type="text"/> 月 <input type="text"/> 日 |      |                                                                                               | 正常值范围编号: <input type="text"/> |                                       |                                       |
| 检查项目                                                                       | 测量结果 |                                                                                               | 结果判定                          |                                       |                                       |
| IL-6                                                                       | 实测值  | 单位                                                                                            | 正常                            | 异常                                    |                                       |
|                                                                            |      | <input type="checkbox"/> <sub>1</sub> pg/mL <input type="checkbox"/> 其他: <input type="text"/> |                               | <input type="checkbox"/> <sub>1</sub> | 无临床意义                                 |
|                                                                            |      |                                                                                               |                               | <input type="checkbox"/> <sub>2</sub> | <input type="checkbox"/> <sub>3</sub> |

| IL-6 <input type="checkbox"/> 未查, 原因 <input type="text"/>                  |      |                                                                                               |                               |                                       |                                       |
|----------------------------------------------------------------------------|------|-----------------------------------------------------------------------------------------------|-------------------------------|---------------------------------------|---------------------------------------|
| 采样日期: <input type="text"/> 年 <input type="text"/> 月 <input type="text"/> 日 |      |                                                                                               | 正常值范围编号: <input type="text"/> |                                       |                                       |
| 检查项目                                                                       | 测量结果 |                                                                                               | 结果判定                          |                                       |                                       |
| IL-6                                                                       | 实测值  | 单位                                                                                            | 正常                            | 异常                                    |                                       |
|                                                                            |      | <input type="checkbox"/> <sub>1</sub> pg/mL <input type="checkbox"/> 其他: <input type="text"/> |                               | <input type="checkbox"/> <sub>1</sub> | 无临床意义                                 |
|                                                                            |      |                                                                                               |                               | <input type="checkbox"/> <sub>2</sub> | <input type="checkbox"/> <sub>3</sub> |

| IL-6 <input type="checkbox"/> 未查, 原因 <input type="text"/>                  |      |                                                                                               |                               |                                       |                                       |
|----------------------------------------------------------------------------|------|-----------------------------------------------------------------------------------------------|-------------------------------|---------------------------------------|---------------------------------------|
| 采样日期: <input type="text"/> 年 <input type="text"/> 月 <input type="text"/> 日 |      |                                                                                               | 正常值范围编号: <input type="text"/> |                                       |                                       |
| 检查项目                                                                       | 测量结果 |                                                                                               | 结果判定                          |                                       |                                       |
| IL-6                                                                       | 实测值  | 单位                                                                                            | 正常                            | 异常                                    |                                       |
|                                                                            |      | <input type="checkbox"/> <sub>1</sub> pg/mL <input type="checkbox"/> 其他: <input type="text"/> |                               | <input type="checkbox"/> <sub>1</sub> | 无临床意义                                 |
|                                                                            |      |                                                                                               |                               | <input type="checkbox"/> <sub>2</sub> | <input type="checkbox"/> <sub>3</sub> |

| IL-6 <input type="checkbox"/> 未查, 原因 <input type="text"/>                  |      |                                                                                               |                               |                                       |                                       |
|----------------------------------------------------------------------------|------|-----------------------------------------------------------------------------------------------|-------------------------------|---------------------------------------|---------------------------------------|
| 采样日期: <input type="text"/> 年 <input type="text"/> 月 <input type="text"/> 日 |      |                                                                                               | 正常值范围编号: <input type="text"/> |                                       |                                       |
| 检查项目                                                                       | 测量结果 |                                                                                               | 结果判定                          |                                       |                                       |
| IL-6                                                                       | 实测值  | 单位                                                                                            | 正常                            | 异常                                    |                                       |
|                                                                            |      | <input type="checkbox"/> <sub>1</sub> pg/mL <input type="checkbox"/> 其他: <input type="text"/> |                               | <input type="checkbox"/> <sub>1</sub> | 无临床意义                                 |
|                                                                            |      |                                                                                               |                               | <input type="checkbox"/> <sub>2</sub> | <input type="checkbox"/> <sub>3</sub> |

|                             |                 |
|-----------------------------|-----------------|
| 研究方案编号: KY2020-29           | <b>附表-计划外检查</b> |
| 研究中心编号 <input type="text"/> |                 |

|                                                                                                                                            |                               |
|--------------------------------------------------------------------------------------------------------------------------------------------|-------------------------------|
| <b>尿或血清 HCG (仅适用于育龄女性)</b> <input type="checkbox"/> <sub>0</sub> 未查, 原因_____                                                               |                               |
| <input type="checkbox"/> <sub>1</sub> 不适用 (男性或不具有生育能力的女性)                                                                                  |                               |
| 采样日期: <input type="text"/> 年 <input type="text"/> 月 <input type="text"/> 日                                                                 | 正常值范围编号: <input type="text"/> |
| 采样类别: <input type="checkbox"/> <sub>1</sub> 血液 <input type="checkbox"/> <sub>2</sub> 尿液                                                    |                               |
| 检查结果: <input type="checkbox"/> <sub>1</sub> 阴性 <input type="checkbox"/> <sub>2</sub> 阳性 <input type="checkbox"/> <sub>3</sub> 其他: _____    |                               |
| 单位: <input type="checkbox"/> <sub>1</sub> 不适用 <input type="checkbox"/> <sub>2</sub> mIU/mL <input type="checkbox"/> <sub>3</sub> 其他: _____ |                               |

|                                                                                                                                            |                               |
|--------------------------------------------------------------------------------------------------------------------------------------------|-------------------------------|
| <b>尿或血清 HCG (仅适用于育龄女性)</b> <input type="checkbox"/> <sub>0</sub> 未查, 原因_____                                                               |                               |
| <input type="checkbox"/> <sub>1</sub> 不适用 (男性或不具有生育能力的女性)                                                                                  |                               |
| 采样日期: <input type="text"/> 年 <input type="text"/> 月 <input type="text"/> 日                                                                 | 正常值范围编号: <input type="text"/> |
| 采样类别: <input type="checkbox"/> <sub>1</sub> 血液 <input type="checkbox"/> <sub>2</sub> 尿液                                                    |                               |
| 检查结果: <input type="checkbox"/> <sub>1</sub> 阴性 <input type="checkbox"/> <sub>2</sub> 阳性 <input type="checkbox"/> <sub>3</sub> 其他: _____    |                               |
| 单位: <input type="checkbox"/> <sub>1</sub> 不适用 <input type="checkbox"/> <sub>2</sub> mIU/mL <input type="checkbox"/> <sub>3</sub> 其他: _____ |                               |

|                                                                                                                                            |                               |
|--------------------------------------------------------------------------------------------------------------------------------------------|-------------------------------|
| <b>尿或血清 HCG (仅适用于育龄女性)</b> <input type="checkbox"/> <sub>0</sub> 未查, 原因_____                                                               |                               |
| <input type="checkbox"/> <sub>1</sub> 不适用 (男性或不具有生育能力的女性)                                                                                  |                               |
| 采样日期: <input type="text"/> 年 <input type="text"/> 月 <input type="text"/> 日                                                                 | 正常值范围编号: <input type="text"/> |
| 采样类别: <input type="checkbox"/> <sub>1</sub> 血液 <input type="checkbox"/> <sub>2</sub> 尿液                                                    |                               |
| 检查结果: <input type="checkbox"/> <sub>1</sub> 阴性 <input type="checkbox"/> <sub>2</sub> 阳性 <input type="checkbox"/> <sub>3</sub> 其他: _____    |                               |
| 单位: <input type="checkbox"/> <sub>1</sub> 不适用 <input type="checkbox"/> <sub>2</sub> mIU/mL <input type="checkbox"/> <sub>3</sub> 其他: _____ |                               |

|                                                                                                                                            |                               |
|--------------------------------------------------------------------------------------------------------------------------------------------|-------------------------------|
| <b>尿或血清 HCG (仅适用于育龄女性)</b> <input type="checkbox"/> <sub>0</sub> 未查, 原因_____                                                               |                               |
| <input type="checkbox"/> <sub>1</sub> 不适用 (男性或不具有生育能力的女性)                                                                                  |                               |
| 采样日期: <input type="text"/> 年 <input type="text"/> 月 <input type="text"/> 日                                                                 | 正常值范围编号: <input type="text"/> |
| 采样类别: <input type="checkbox"/> <sub>1</sub> 血液 <input type="checkbox"/> <sub>2</sub> 尿液                                                    |                               |
| 检查结果: <input type="checkbox"/> <sub>1</sub> 阴性 <input type="checkbox"/> <sub>2</sub> 阳性 <input type="checkbox"/> <sub>3</sub> 其他: _____    |                               |
| 单位: <input type="checkbox"/> <sub>1</sub> 不适用 <input type="checkbox"/> <sub>2</sub> mIU/mL <input type="checkbox"/> <sub>3</sub> 其他: _____ |                               |

|                                                                                                                                      |                 |
|--------------------------------------------------------------------------------------------------------------------------------------|-----------------|
| 研究方案编号: KY2020-29                                                                                                                    | <b>附表-计划外检查</b> |
| 研究中心编号 <input type="text"/> <input type="text"/> <input type="text"/> <input type="text"/> <input type="text"/> <input type="text"/> |                 |

|                                                                                                                                                                                     |
|-------------------------------------------------------------------------------------------------------------------------------------------------------------------------------------|
| <b>12 导联心电图</b> <input type="checkbox"/> <sub>0</sub> 未查, 原因_____                                                                                                                   |
| 检查日期: <input type="text"/> <input type="text"/> <input type="text"/> <input type="text"/> 年 <input type="text"/> <input type="text"/> 月 <input type="text"/> <input type="text"/> 日 |
| 检查结果: <input type="checkbox"/> <sub>1</sub> 正常 <input type="checkbox"/> <sub>2</sub> 异常无临床意义 <input type="checkbox"/> <sub>3</sub> 异常有临床意义                                          |
| 若“异常”, 请描述: _____<br>_____                                                                                                                                                          |

|                                                                                                                                                                                     |
|-------------------------------------------------------------------------------------------------------------------------------------------------------------------------------------|
| <b>12 导联心电图</b> <input type="checkbox"/> <sub>0</sub> 未查, 原因_____                                                                                                                   |
| 检查日期: <input type="text"/> <input type="text"/> <input type="text"/> <input type="text"/> 年 <input type="text"/> <input type="text"/> 月 <input type="text"/> <input type="text"/> 日 |
| 检查结果: <input type="checkbox"/> <sub>1</sub> 正常 <input type="checkbox"/> <sub>2</sub> 异常无临床意义 <input type="checkbox"/> <sub>3</sub> 异常有临床意义                                          |
| 若“异常”, 请描述: _____<br>_____                                                                                                                                                          |

|                                                                                                                                                                                     |
|-------------------------------------------------------------------------------------------------------------------------------------------------------------------------------------|
| <b>12 导联心电图</b> <input type="checkbox"/> <sub>0</sub> 未查, 原因_____                                                                                                                   |
| 检查日期: <input type="text"/> <input type="text"/> <input type="text"/> <input type="text"/> 年 <input type="text"/> <input type="text"/> 月 <input type="text"/> <input type="text"/> 日 |
| 检查结果: <input type="checkbox"/> <sub>1</sub> 正常 <input type="checkbox"/> <sub>2</sub> 异常无临床意义 <input type="checkbox"/> <sub>3</sub> 异常有临床意义                                          |
| 若“异常”, 请描述: _____<br>_____                                                                                                                                                          |

|                                                                                                                                                                                     |
|-------------------------------------------------------------------------------------------------------------------------------------------------------------------------------------|
| <b>12 导联心电图</b> <input type="checkbox"/> <sub>0</sub> 未查, 原因_____                                                                                                                   |
| 检查日期: <input type="text"/> <input type="text"/> <input type="text"/> <input type="text"/> 年 <input type="text"/> <input type="text"/> 月 <input type="text"/> <input type="text"/> 日 |
| 检查结果: <input type="checkbox"/> <sub>1</sub> 正常 <input type="checkbox"/> <sub>2</sub> 异常无临床意义 <input type="checkbox"/> <sub>3</sub> 异常有临床意义                                          |
| 若“异常”, 请描述: _____<br>_____                                                                                                                                                          |

|                                                                                                                                                                                     |
|-------------------------------------------------------------------------------------------------------------------------------------------------------------------------------------|
| <b>12 导联心电图</b> <input type="checkbox"/> <sub>0</sub> 未查, 原因_____                                                                                                                   |
| 检查日期: <input type="text"/> <input type="text"/> <input type="text"/> <input type="text"/> 年 <input type="text"/> <input type="text"/> 月 <input type="text"/> <input type="text"/> 日 |
| 检查结果: <input type="checkbox"/> <sub>1</sub> 正常 <input type="checkbox"/> <sub>2</sub> 异常无临床意义 <input type="checkbox"/> <sub>3</sub> 异常有临床意义                                          |
| 若“异常”, 请描述: _____<br>_____                                                                                                                                                          |

|                                                                                                                                                                                     |
|-------------------------------------------------------------------------------------------------------------------------------------------------------------------------------------|
| <b>12 导联心电图</b> <input type="checkbox"/> <sub>0</sub> 未查, 原因_____                                                                                                                   |
| 检查日期: <input type="text"/> <input type="text"/> <input type="text"/> <input type="text"/> 年 <input type="text"/> <input type="text"/> 月 <input type="text"/> <input type="text"/> 日 |
| 检查结果: <input type="checkbox"/> <sub>1</sub> 正常 <input type="checkbox"/> <sub>2</sub> 异常无临床意义 <input type="checkbox"/> <sub>3</sub> 异常有临床意义                                          |
| 若“异常”, 请描述: _____<br>_____                                                                                                                                                          |

|                             |          |
|-----------------------------|----------|
| 研究方案编号: KY2020-29           | 附表-计划外检查 |
| 研究中心编号 <input type="text"/> |          |

|                                                               |                                                                                                                                                                                                                                                                      |
|---------------------------------------------------------------|----------------------------------------------------------------------------------------------------------------------------------------------------------------------------------------------------------------------------------------------------------------------|
| 新型冠状病毒核酸检测 <input type="checkbox"/> <sub>0</sub> 未查, 原因 _____ |                                                                                                                                                                                                                                                                      |
| 采样部位 (可多选)                                                    | <input type="checkbox"/> <sub>0</sub> 上呼吸道 <input type="checkbox"/> <sub>1</sub> 下呼吸道                                                                                                                                                                                |
| 上呼吸道                                                          | 采样日期: <input type="text"/> 年 <input type="text"/> 月 <input type="text"/> 日<br>检查结果: <input type="checkbox"/> <sub>1</sub> 阴性 <input type="checkbox"/> <sub>2</sub> 阳性 <input type="checkbox"/> <sub>3</sub> 无法判断 <input type="checkbox"/> <sub>4</sub> 其他, 请描述 _____ |
| 下呼吸道                                                          | 采样日期: <input type="text"/> 年 <input type="text"/> 月 <input type="text"/> 日<br>检查结果: <input type="checkbox"/> <sub>1</sub> 阴性 <input type="checkbox"/> <sub>2</sub> 阳性 <input type="checkbox"/> <sub>3</sub> 无法判断 <input type="checkbox"/> <sub>4</sub> 其他, 请描述 _____ |
| 结果判定                                                          | <input type="checkbox"/> <sub>1</sub> 阴性 <input type="checkbox"/> <sub>2</sub> 阳性 <input type="checkbox"/> <sub>3</sub> 无法判断 <input type="checkbox"/> <sub>4</sub> 其他, 请描述 _____                                                                                     |

|                                                               |                                                                                                                                                                                                                                                                      |
|---------------------------------------------------------------|----------------------------------------------------------------------------------------------------------------------------------------------------------------------------------------------------------------------------------------------------------------------|
| 新型冠状病毒核酸检测 <input type="checkbox"/> <sub>0</sub> 未查, 原因 _____ |                                                                                                                                                                                                                                                                      |
| 采样部位 (可多选)                                                    | <input type="checkbox"/> <sub>0</sub> 上呼吸道 <input type="checkbox"/> <sub>1</sub> 下呼吸道                                                                                                                                                                                |
| 上呼吸道                                                          | 采样日期: <input type="text"/> 年 <input type="text"/> 月 <input type="text"/> 日<br>检查结果: <input type="checkbox"/> <sub>1</sub> 阴性 <input type="checkbox"/> <sub>2</sub> 阳性 <input type="checkbox"/> <sub>3</sub> 无法判断 <input type="checkbox"/> <sub>4</sub> 其他, 请描述 _____ |
| 下呼吸道                                                          | 采样日期: <input type="text"/> 年 <input type="text"/> 月 <input type="text"/> 日<br>检查结果: <input type="checkbox"/> <sub>1</sub> 阴性 <input type="checkbox"/> <sub>2</sub> 阳性 <input type="checkbox"/> <sub>3</sub> 无法判断 <input type="checkbox"/> <sub>4</sub> 其他, 请描述 _____ |
| 结果判定                                                          | <input type="checkbox"/> <sub>1</sub> 阴性 <input type="checkbox"/> <sub>2</sub> 阳性 <input type="checkbox"/> <sub>3</sub> 无法判断 <input type="checkbox"/> <sub>4</sub> 其他, 请描述 _____                                                                                     |

|                                                               |                                                                                                                                                                                                                                                                      |
|---------------------------------------------------------------|----------------------------------------------------------------------------------------------------------------------------------------------------------------------------------------------------------------------------------------------------------------------|
| 新型冠状病毒核酸检测 <input type="checkbox"/> <sub>0</sub> 未查, 原因 _____ |                                                                                                                                                                                                                                                                      |
| 采样部位 (可多选)                                                    | <input type="checkbox"/> <sub>0</sub> 上呼吸道 <input type="checkbox"/> <sub>1</sub> 下呼吸道                                                                                                                                                                                |
| 上呼吸道                                                          | 采样日期: <input type="text"/> 年 <input type="text"/> 月 <input type="text"/> 日<br>检查结果: <input type="checkbox"/> <sub>1</sub> 阴性 <input type="checkbox"/> <sub>2</sub> 阳性 <input type="checkbox"/> <sub>3</sub> 无法判断 <input type="checkbox"/> <sub>4</sub> 其他, 请描述 _____ |
| 下呼吸道                                                          | 采样日期: <input type="text"/> 年 <input type="text"/> 月 <input type="text"/> 日<br>检查结果: <input type="checkbox"/> <sub>1</sub> 阴性 <input type="checkbox"/> <sub>2</sub> 阳性 <input type="checkbox"/> <sub>3</sub> 无法判断 <input type="checkbox"/> <sub>4</sub> 其他, 请描述 _____ |
| 结果判定                                                          | <input type="checkbox"/> <sub>1</sub> 阴性 <input type="checkbox"/> <sub>2</sub> 阳性 <input type="checkbox"/> <sub>3</sub> 无法判断 <input type="checkbox"/> <sub>4</sub> 其他, 请描述 _____                                                                                     |

|                                                               |                                                                                                                                                                                                                                                                      |
|---------------------------------------------------------------|----------------------------------------------------------------------------------------------------------------------------------------------------------------------------------------------------------------------------------------------------------------------|
| 新型冠状病毒核酸检测 <input type="checkbox"/> <sub>0</sub> 未查, 原因 _____ |                                                                                                                                                                                                                                                                      |
| 采样部位 (可多选)                                                    | <input type="checkbox"/> <sub>0</sub> 上呼吸道 <input type="checkbox"/> <sub>1</sub> 下呼吸道                                                                                                                                                                                |
| 上呼吸道                                                          | 采样日期: <input type="text"/> 年 <input type="text"/> 月 <input type="text"/> 日<br>检查结果: <input type="checkbox"/> <sub>1</sub> 阴性 <input type="checkbox"/> <sub>2</sub> 阳性 <input type="checkbox"/> <sub>3</sub> 无法判断 <input type="checkbox"/> <sub>4</sub> 其他, 请描述 _____ |
| 下呼吸道                                                          | 采样日期: <input type="text"/> 年 <input type="text"/> 月 <input type="text"/> 日<br>检查结果: <input type="checkbox"/> <sub>1</sub> 阴性 <input type="checkbox"/> <sub>2</sub> 阳性 <input type="checkbox"/> <sub>3</sub> 无法判断 <input type="checkbox"/> <sub>4</sub> 其他, 请描述 _____ |
| 结果判定                                                          | <input type="checkbox"/> <sub>1</sub> 阴性 <input type="checkbox"/> <sub>2</sub> 阳性 <input type="checkbox"/> <sub>3</sub> 无法判断 <input type="checkbox"/> <sub>4</sub> 其他, 请描述 _____                                                                                     |

|                                                                                                                                      |                 |
|--------------------------------------------------------------------------------------------------------------------------------------|-----------------|
| 研究方案编号: KY2020-29                                                                                                                    | <b>附表-计划外检查</b> |
| 研究中心编号 <input type="text"/> <input type="text"/> <input type="text"/> <input type="text"/> <input type="text"/> <input type="text"/> |                 |

|                                                                                                                                                                                     |
|-------------------------------------------------------------------------------------------------------------------------------------------------------------------------------------|
| <b>指脉氧饱和度</b> （不吸氧情况下） <input type="checkbox"/> 未查，原因_____                                                                                                                          |
| 检查日期: <input type="text"/> <input type="text"/> <input type="text"/> <input type="text"/> 年 <input type="text"/> <input type="text"/> 月 <input type="text"/> <input type="text"/> 日 |
| 实测值: _____ %（静息状态）                                                                                                                                                                  |

|                                                                                                                                                                                     |
|-------------------------------------------------------------------------------------------------------------------------------------------------------------------------------------|
| <b>指脉氧饱和度</b> （不吸氧情况下） <input type="checkbox"/> 未查，原因_____                                                                                                                          |
| 检查日期: <input type="text"/> <input type="text"/> <input type="text"/> <input type="text"/> 年 <input type="text"/> <input type="text"/> 月 <input type="text"/> <input type="text"/> 日 |
| 实测值: _____ %（静息状态）                                                                                                                                                                  |

|                                                                                                                                                                                     |
|-------------------------------------------------------------------------------------------------------------------------------------------------------------------------------------|
| <b>指脉氧饱和度</b> （不吸氧情况下） <input type="checkbox"/> 未查，原因_____                                                                                                                          |
| 检查日期: <input type="text"/> <input type="text"/> <input type="text"/> <input type="text"/> 年 <input type="text"/> <input type="text"/> 月 <input type="text"/> <input type="text"/> 日 |
| 实测值: _____ %（静息状态）                                                                                                                                                                  |

|                                                                                                                                                                                     |
|-------------------------------------------------------------------------------------------------------------------------------------------------------------------------------------|
| <b>指脉氧饱和度</b> （不吸氧情况下） <input type="checkbox"/> 未查，原因_____                                                                                                                          |
| 检查日期: <input type="text"/> <input type="text"/> <input type="text"/> <input type="text"/> 年 <input type="text"/> <input type="text"/> 月 <input type="text"/> <input type="text"/> 日 |
| 实测值: _____ %（静息状态）                                                                                                                                                                  |

|                                                                                                                                                                                     |
|-------------------------------------------------------------------------------------------------------------------------------------------------------------------------------------|
| <b>指脉氧饱和度</b> （不吸氧情况下） <input type="checkbox"/> 未查，原因_____                                                                                                                          |
| 检查日期: <input type="text"/> <input type="text"/> <input type="text"/> <input type="text"/> 年 <input type="text"/> <input type="text"/> 月 <input type="text"/> <input type="text"/> 日 |
| 实测值: _____ %（静息状态）                                                                                                                                                                  |

|                                                                                                                                                                                     |
|-------------------------------------------------------------------------------------------------------------------------------------------------------------------------------------|
| <b>指脉氧饱和度</b> （不吸氧情况下） <input type="checkbox"/> 未查，原因_____                                                                                                                          |
| 检查日期: <input type="text"/> <input type="text"/> <input type="text"/> <input type="text"/> 年 <input type="text"/> <input type="text"/> 月 <input type="text"/> <input type="text"/> 日 |
| 实测值: _____ %（静息状态）                                                                                                                                                                  |

|                                                                                                                                                                                     |
|-------------------------------------------------------------------------------------------------------------------------------------------------------------------------------------|
| <b>指脉氧饱和度</b> （不吸氧情况下） <input type="checkbox"/> 未查，原因_____                                                                                                                          |
| 检查日期: <input type="text"/> <input type="text"/> <input type="text"/> <input type="text"/> 年 <input type="text"/> <input type="text"/> 月 <input type="text"/> <input type="text"/> 日 |
| 实测值: _____ %（静息状态）                                                                                                                                                                  |







|                             |          |
|-----------------------------|----------|
| 研究方案编号: KY2020-29           | 附表-计划外检查 |
| 研究中心编号 <input type="text"/> |          |

|                                                          |                                                                                                                                                                                                                                                                                                                                                                                              |
|----------------------------------------------------------|----------------------------------------------------------------------------------------------------------------------------------------------------------------------------------------------------------------------------------------------------------------------------------------------------------------------------------------------------------------------------------------------|
| 临床状态 <input type="checkbox"/> <sub>0</sub> 未评价, 原因 _____ |                                                                                                                                                                                                                                                                                                                                                                                              |
| 评价日期                                                     | <input type="text"/> 年 <input type="text"/> 月 <input type="text"/> 日                                                                                                                                                                                                                                                                                                                         |
| 评价结果                                                     | <input type="checkbox"/> <sub>1</sub> 1级: 出院<br><input type="checkbox"/> <sub>2</sub> 2级: 住院, 不需要氧疗<br><input type="checkbox"/> <sub>3</sub> 3级: 住院, 需要氧疗 (非NIV/HFNC)<br><input type="checkbox"/> <sub>4</sub> 4级: ICU/住院, 需要无创机械通气 (NIV) /高流量鼻导管氧疗 (HFNC)<br><input type="checkbox"/> <sub>5</sub> 5级: ICU, 需要体外膜肺氧合 (ECMO) 和/或有创机械通气 (IMV)<br><input type="checkbox"/> <sub>6</sub> 6级: 死亡 |

|                                                          |                                                                                                                                                                                                                                                                                                                                                                                              |
|----------------------------------------------------------|----------------------------------------------------------------------------------------------------------------------------------------------------------------------------------------------------------------------------------------------------------------------------------------------------------------------------------------------------------------------------------------------|
| 临床状态 <input type="checkbox"/> <sub>0</sub> 未评价, 原因 _____ |                                                                                                                                                                                                                                                                                                                                                                                              |
| 评价日期                                                     | <input type="text"/> 年 <input type="text"/> 月 <input type="text"/> 日                                                                                                                                                                                                                                                                                                                         |
| 评价结果                                                     | <input type="checkbox"/> <sub>1</sub> 1级: 出院<br><input type="checkbox"/> <sub>2</sub> 2级: 住院, 不需要氧疗<br><input type="checkbox"/> <sub>3</sub> 3级: 住院, 需要氧疗 (非NIV/HFNC)<br><input type="checkbox"/> <sub>4</sub> 4级: ICU/住院, 需要无创机械通气 (NIV) /高流量鼻导管氧疗 (HFNC)<br><input type="checkbox"/> <sub>5</sub> 5级: ICU, 需要体外膜肺氧合 (ECMO) 和/或有创机械通气 (IMV)<br><input type="checkbox"/> <sub>6</sub> 6级: 死亡 |

|                                                          |                                                                                                                                                                                                                                                                                                                                                                                              |
|----------------------------------------------------------|----------------------------------------------------------------------------------------------------------------------------------------------------------------------------------------------------------------------------------------------------------------------------------------------------------------------------------------------------------------------------------------------|
| 临床状态 <input type="checkbox"/> <sub>0</sub> 未评价, 原因 _____ |                                                                                                                                                                                                                                                                                                                                                                                              |
| 评价日期                                                     | <input type="text"/> 年 <input type="text"/> 月 <input type="text"/> 日                                                                                                                                                                                                                                                                                                                         |
| 评价结果                                                     | <input type="checkbox"/> <sub>1</sub> 1级: 出院<br><input type="checkbox"/> <sub>2</sub> 2级: 住院, 不需要氧疗<br><input type="checkbox"/> <sub>3</sub> 3级: 住院, 需要氧疗 (非NIV/HFNC)<br><input type="checkbox"/> <sub>4</sub> 4级: ICU/住院, 需要无创机械通气 (NIV) /高流量鼻导管氧疗 (HFNC)<br><input type="checkbox"/> <sub>5</sub> 5级: ICU, 需要体外膜肺氧合 (ECMO) 和/或有创机械通气 (IMV)<br><input type="checkbox"/> <sub>6</sub> 6级: 死亡 |

|                                                          |                                                                                                                                                                                                                                                                                                                                                                                              |
|----------------------------------------------------------|----------------------------------------------------------------------------------------------------------------------------------------------------------------------------------------------------------------------------------------------------------------------------------------------------------------------------------------------------------------------------------------------|
| 临床状态 <input type="checkbox"/> <sub>0</sub> 未评价, 原因 _____ |                                                                                                                                                                                                                                                                                                                                                                                              |
| 评价日期                                                     | <input type="text"/> 年 <input type="text"/> 月 <input type="text"/> 日                                                                                                                                                                                                                                                                                                                         |
| 评价结果                                                     | <input type="checkbox"/> <sub>1</sub> 1级: 出院<br><input type="checkbox"/> <sub>2</sub> 2级: 住院, 不需要氧疗<br><input type="checkbox"/> <sub>3</sub> 3级: 住院, 需要氧疗 (非NIV/HFNC)<br><input type="checkbox"/> <sub>4</sub> 4级: ICU/住院, 需要无创机械通气 (NIV) /高流量鼻导管氧疗 (HFNC)<br><input type="checkbox"/> <sub>5</sub> 5级: ICU, 需要体外膜肺氧合 (ECMO) 和/或有创机械通气 (IMV)<br><input type="checkbox"/> <sub>6</sub> 6级: 死亡 |

|                                                      |          |
|------------------------------------------------------|----------|
| 研究方案编号: KY2020-29                                    | 附表-计划外检查 |
| 研究中心编号  __   __  受试者筛选号  __   __   __   __   __   __ |          |

|                 |                                              |
|-----------------|----------------------------------------------|
| <b>签署知情同意书</b>  |                                              |
| 签署知情同意书日期       | __   __   __   __  年  __   __  月  __   __  日 |
| 知情同意书版本号        | _____                                        |
| 签署知情同意书时适用方案版本号 | __   __  .  __   __                          |

|                 |                                              |
|-----------------|----------------------------------------------|
| <b>签署知情同意书</b>  |                                              |
| 签署知情同意书日期       | __   __   __   __  年  __   __  月  __   __  日 |
| 知情同意书版本号        | _____                                        |
| 签署知情同意书时适用方案版本号 | __   __  .  __   __                          |

|                 |                                              |
|-----------------|----------------------------------------------|
| <b>签署知情同意书</b>  |                                              |
| 签署知情同意书日期       | __   __   __   __  年  __   __  月  __   __  日 |
| 知情同意书版本号        | _____                                        |
| 签署知情同意书时适用方案版本号 | __   __  .  __   __                          |

|                 |                                              |
|-----------------|----------------------------------------------|
| <b>签署知情同意书</b>  |                                              |
| 签署知情同意书日期       | __   __   __   __  年  __   __  月  __   __  日 |
| 知情同意书版本号        | _____                                        |
| 签署知情同意书时适用方案版本号 | __   __  .  __   __                          |

|                 |                                              |
|-----------------|----------------------------------------------|
| <b>签署知情同意书</b>  |                                              |
| 签署知情同意书日期       | __   __   __   __  年  __   __  月  __   __  日 |
| 知情同意书版本号        | _____                                        |
| 签署知情同意书时适用方案版本号 | __   __  .  __   __                          |

# **Final Patient Consent Form: KY2020-29**

Version date. 13 February 2020

This is the translated version of the Patient Consent Form  
in English.

**HYDROXYCHLOROQUINE SULFATE IN THE TREATMENT OF COVID-19  
INFECTION -A RANDOMIZED, OPEN MULTICENTER STUDY**

**INFORMED CONSENT**

Dear Sir or Madame:

We invite you to participate in a randomized, controlled, open multicenter study of hydroxychloroquine sulfate in the treatment of COVID-19 infection clinical research. Before you agree to participate in this study, please read the following message carefully. You may also discuss it with your relatives and ask your doctor or researcher any questions you wish to know until you get a satisfied answer. If you agree to participate in this study, please sign the informed consent and keep a copy of the informed consent signed by both parties.

**I. RESEARCH BACKGROUND AND PURPOSE:**

Since December 2019, a number of cases of COVID-19 pneumonia have been found in wuhan, Hubei province. With the spread of the epidemic, such cases have also been found in other parts of China and abroad. So far, there is still a lack of effective and specific anti-coronavirus drugs in the treatment of COVID-19 pneumonia. Using drugs with potential antiviral effects and already been clinically proven safety in humans is one of the fastest solutions. Hydroxychloroquine (HCQ) sulfate is an antimalarial and immunoregulatory drug that has been clinically used for decades. It was first used in the treatment of systemic lupus erythematosus (SLE) in 1955 and rheumatoid arthritis in 1988. Hydroxychloroquine sulfate has multiple mechanisms of action such as immune regulation, anti-inflammatory, inhibition of cell proliferation and mutagenicity, reduction of blood lipid, anti-thrombotic, and reduction of diabetes risk, etc. The indications of hydroxychloroquine sulfate in clinical practice extends from rheumatic immune diseases to dermatology, oncology and

other fields. Recently, clinical studies have confirmed hydroxychloroquine sulfate possible antiviral effect of high doses in various respiratory viruses (including coronavirus SARS and Middle East respiratory virus). The drug safety of hydroxychloroquine sulfate has been widely recognized, and the drug's tissue distribution concentration is also high.

Therefore, we conducted a national multi-center clinical study to investigate the effect of hydroxychloroquine sulfate on the viral negative conversion rate, clinical symptom remission, improvement of laboratory examination result, and prevention of increased progression. It is expected that hydroxychloroquine sulfate can be confirmed as effective drug in treating patients with COVID-19 infection.

## **II. PROCEDURES**

This study was carried out in 20 centers across the country. After you participate in this study, we will follow up and observe your condition for 28 days, including 14 days or 21 days according to the disease severity after treatment and 7 days after treatment. You will receive standard care according to Chinese guideline of COVID-19 pneumonia edition 6 or standard care and hydroxychloroquine sulfate orally. Routine consultation and physical examination, chest HRCT, vital signs monitoring, relevant blood examination and viral nucleic acid sampling will be done according to the protocol.

## **III. WHAT DO YOU NEED TO DO TO PARTICIPATE IN THIS STUDY**

To participate in this study, the doctor will treat your disease according to the current COVID - 19 pneumonia Chinese guideline. Give fully active treatment, follow-up, and randomly with or without use of hydroxychloroquine sulfate orally (for 14-21 days according to the disease severity).

Investigators will collect your demographic information, evaluate your clinical condition before the treatment, 4 days, 7 days, 10 days, 14 days and 21 days (for severe pneumonia) during the

treatment. Laboratory examination and safety of the treatment were followed up along with the treatment and 7 days after treatment.

#### **IV. POSSIBLE BENEFITS OF PARTICIPATING IN THIS STUDY**

Your participation in this study may contribute to your recovery from COVID 19 infection.

#### **V. POSSIBLE ADVERSE REACTIONS, RISKS AND RISK PREVENTION MEASURES IN THE STUDY**

You will not be at additional risk if you are enrolled in a routine medical program where all examinations are for diseases.

#### **VI. DESCRIPTION OF EXPENSES**

The required examination and treatment in this study are completed according to the routine of diagnosis and treatment, and there will be no additional cost for you to participate in this study.

#### **VII. COMPENSATION FOR PARTICIPATION IN THE STUDY, INCLUDING COMPENSATION FOR INJURY**

This study is related to diseases of public health emergencies. There is no corresponding financial compensation. At the same time, the treatment you received after participating in this study is carried out in accordance with the standard management of diseases. The additional hydroxychloroquine sulfate tablets you received are commonly used as a routine clinical medication, but individual patients may still have individual adverse drug reactions. However, since the drug has been on the market for many years, investigators are familiar with the type and severity of adverse reactions, and will take corresponding treatment according to the condition if it happens. Corresponding measures will include stopping the use of the drug according to the severity of the adverse reactions. Your participation will make an important contribution to the treatment of covid-

19 infection and provide help for the future treatment of similar patients. We appreciate your participation very much.

#### **VIII. ALTERNATIVE PLAN**

This is a clinical observation study, if you are not willing to participate in this study, according to the routine management of the disease, will not affect your clinical treatment.

#### **IX. CONFIDENTIALITY OF YOUR PERSONAL INFORMATION**

Your medical records (including research medical records and physical and laboratory examination reports) will be kept in the hospital as required. In addition to investigators, ethics committees, supervision, auditing, pharmaceutical administration departments and other relevant personnel will be allowed to access your medical records, other personnel not related to the study will not have access to your medical records without permission. Public reports of the results of this study will not disclose your personal identity. We will do everything we can to protect the privacy of your personal medical information.

#### **X. TERMINATION OF STUDY**

Participation in the study is entirely voluntary. You may refuse to participate in the study or withdraw from the study without reason at any time during the study. This will not affect your relationship with your doctor, nor will it affect the loss of your medical or other benefits. In addition, your participation in this study may be terminated for the following reasons:

1. You did not follow the study protocol.
2. You fail to conduct follow-up observation on time.



## **XI. ETHICS COMMITTEE**

This study was reported to the human research ethics committee of Ruijin hospital affiliated to the school of medicine of Shanghai Jiao tong university, and was approved after a comprehensive review by the committee, including risk assessment of the subjects.

-----

I confirm that I have read and understood the informed consent of this study, voluntarily accepted the treatment in this study, and agreed to use my medical data for the publication of this study.

Subject signature:                      contact:                      date:

Proxy signature (if necessary):                      relationship with subject:                      date:

Witness (if required):                      relationship with subject:                      date:

I confirm that I have explained to the patient the details of the study, including its rights and possible benefits and risks, and given him a copy of the signed informed consent.

Signature of investigator:

Contact information:                      (mobile phone)                      date:

# **Final Patient Consent Form: KY2020-29**

Version date. 13 February 2020

This is the original version of the Patient Consent Form  
in Chinese.

---

## 上海交通大学医学院附属瑞金医院人体研究知情同意书

### 硫酸羟氯喹治疗新型冠状病毒肺炎的一项随机对照、开放的多中心研究 知情同意书

尊敬的\_\_\_\_\_患者：您好！

我们将邀请您参加一项“硫酸羟氯喹治疗新型冠状病毒肺炎的一项随机对照、开放的多中心研究”的临床研究。在您同意参加这项研究之前，请仔细阅读以下内容，您也可以和您的亲属一起讨论，并向您的医生或研究人员提出任何您希望了解的问题，直至得到满意的答复。如果您同意参加本研究，请您签署知情同意书，并且保存一份双方签字的知情同意书的复印件。

#### 一、 研究背景和研究目的

2019 年 12 月以来，湖北省武汉市陆续发现了多例新型冠状病毒感染的肺炎患者，随着疫情的蔓延，我国其他地区及境外也相继发现了此类病例。有效控制病毒复制可以改善疾病进展和临床转归，但迄今为止，目前对 2019-nCoV 感染的肺炎的诊治方案中仍缺乏有效特异的抗冠状病毒药物[3]。尽早使用有潜在抗病毒效应且临床已经证明其在人体使用中有良好安全性的药物是解决这一问题的最快方案之一。硫酸羟氯喹 (hydroxychloroquine, HCQ) 是目前已经在临床应用数十年的抗疟疾和免疫调节药物，1955 年开始用于治疗系统性红斑狼疮 ( SLE )，1988 年开始用于治疗类风湿关节炎，其调节免疫的作用及安全性和有效性已经得到了临床的广泛认可。硫酸羟氯喹具有免疫调节、抗炎、抑制细胞增生和诱变、降低血脂以及抗血栓、降低糖尿病风险等多重作用机制，在临床上羟氯喹应用范围从风湿免疫疾病延伸到皮肤、肿瘤等领域。同时，在抗病毒方面，硫酸羟氯喹也有明显的治疗作用，有临床研究证实对各种呼吸道病毒（包括冠状病毒 SARS 和中东呼吸道病毒）高剂量使用可能存在的抗病毒疗效。其药物的安全性和组织中的分布浓度也有很好的表现。

---

因此，我们开展了一个全国多中心的临床研究，拟对该药物在轻型/普通型新型冠状病毒肺炎患者的病毒转阴率、临床症状缓解、实验室检查指标的改善、预防疾病严重度增加的作用，预期可证实该药物可作为新型冠状病毒肺炎的轻中度患者抗病毒治疗用药。

## 二、具体程序和流程

本次研究在全国多家单位开展，您参加本项目后，我们会对您的病情跟踪观察 21 天其中治疗 14 天，停药后观察 7 天。期间，按照疾病诊治的流程，接受常规的问诊和体格检查、胸部 HRCT、生命体征监测、相关血液检查、病毒核酸采样检查。

研究过程中治疗原则参照国家卫健委发布的第五版新型冠状病毒感染的肺炎诊疗方案进行。

## 三、如果参加研究您需要做什么

参与本项目医生会对您的病情按照目前新型冠状病毒肺炎的诊疗方案给予积极治疗、随访，并随机加用或不加用硫酸羟氯喹片的口服药物治疗（疗程 14 天），治疗开始前、第 4 天、第 7 天、第 10 天和第 14 天会进行相应的临床症状的评估和血液学疗效的评估检查。研究第 14 天会进行胸部 CT 的复查，治疗结束后 7 天再次随访治疗的疗效和安全性。

## 四、参加本研究可能给您带来的受益

您参加本次研究可能有助于您本次新型冠状病毒肺炎的好转康复。

## 五、参加本研究可能发生的不良反应、风险以及风险防范措施

您参加本研究所需检查均为疾病的常规诊疗项目，因此不会额外增加您的风险。

## 六、费用情况说明

本研究的所需检查、治疗都是根据诊疗常规完成，不会因参加本项目而额外增加您的费用。

## 七、参与研究的补偿，包括损伤的赔偿

本项目是一项突发公共卫生事件相关的疾病研究，没有相应的经济补偿。同时，您参与本项目后所接受诊疗按照疾病常规管理进行，所接受的额外硫酸羟氯喹片治疗，作为临床常用药物，仍存在个别患者可能出现个体化的药物不良反应。但因该药物上市多年，不良反应的类型及严重

---

程度研究者均熟悉，将会根据病情采取相应的治疗措施，并根据不良反应的严重程度采取包括停止使用该药物使用在内的相应措施，不会因参与本项目而造成您的损伤。您的参与将为新型冠状病毒肺炎的诊治做出重要的贡献，为同类患者未来的诊断和治疗提供帮助，再次我们向您表示感谢。

## 八、替代方案

这是一项临床观察研究，若您不愿意参加本研究，就按照疾病的常规管理，不会影响您的临床治疗。

## 九、您个人信息的保密

您的医疗记录（包括研究病历及理化检查报告等）将按规定保存在医院。除研究者、伦理委员会、监查、稽查、药政管理部门等相关人员将被允许查阅您的医疗记录外，其他与研究无关的人员在未得到允许的情况下，无权查阅您的医疗记录。本研究结果的公开报告将不会披露您的个人身份。我们将在允许的范围内，尽一切努力保护您个人医疗资料的隐私。

## 十、终止参加研究

是否参加本项研究完全取决于您的自愿。您可以拒绝参加此项研究，或在研究过程中的任何时间无理由退出研究，这都不会影响您和医生的关系，都不会影响对您的医疗或有其他方面利益的损失。考虑到本疾病属于国家关注的突发性公共卫生事件，如果您退出研究后，研究者将继续收集您的诊疗信息，以便科研人员及临床医生日后更好的了解病毒疫情爆发时紧急情况下的治疗方案，使整个社会以及国家受益。

此外，由于以下原因，可能会终止您参与本研究：

- 1、您未遵从研究医生的医嘱。
- 2、您未按时进行随访观察。

## 十一、伦理委员会

本研究已向上海交通大学医学院附属瑞金医院人体研究伦理委员会报告，经委员会的全面审查和包括对受试者的风险评估，并获得了批准。

---

-----

我确认已阅读并理解了本研究的知情同意书，自愿接受本研究中的治疗方法，并同意将我的医疗数据用于本研究的发表。

受试者签名：\_\_\_\_\_ 联系方式：\_\_\_\_\_ 日期：\_\_\_\_\_

代理人签名：\_\_\_\_\_与受试者关系\_\_\_\_\_联系方式\_\_\_\_\_ 日期\_\_\_\_\_

(如果需要)

见证人 (如果需要)：\_\_\_\_\_ 联系方式：\_\_\_\_\_ 日期：\_\_\_\_\_

我确认已向患者解释了本研究的详细情况，包括其权利以及可能的受益和风险，并给其一份签署过的知情同意书副本。

研究者签名：\_\_\_\_\_

联系方式：\_\_\_\_\_ (手机)\_\_\_\_\_ 日期：\_\_\_\_\_
